# Supplementary material for: A tectonic carpet of Variscan flysch at the base of a rootless accretionary prism in northwestern Iberia: U–Pb zircon age constrains from sediments and volcanic olistoliths
Source: Copernicus journal article supplement (doi:10.5194/se-12-835-2021), 2021-04-15
Supplement: Supplementary file 1 [file se-12-835-2021-supplement.zip]

## Cluster 2 - Multiple Gondwana-derived sources

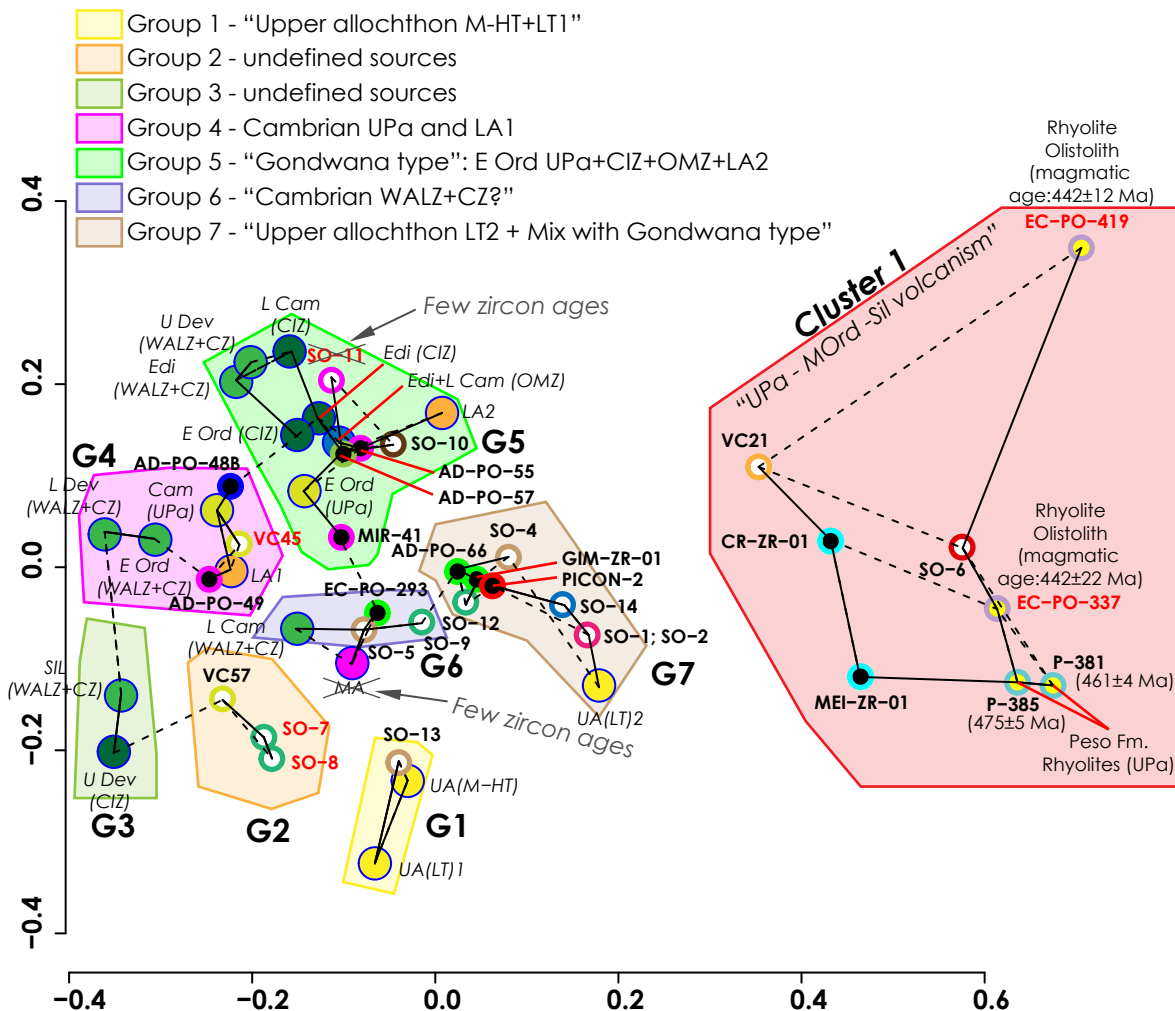

## This study

## Detrital Rocks

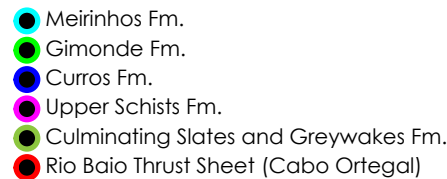

## Volcanic rocks

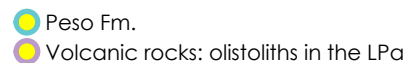

## Previous studies

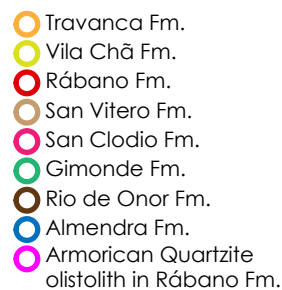

### Source A

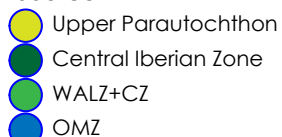

**Source B**

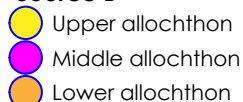

Olistoliths are labeled in red
