# Supplementary material for: A tectonic carpet of Variscan flysch at the base of a rootless accretionary prism in northwestern Iberia: U–Pb zircon age constrains from sediments and volcanic olistoliths
Source: Copernicus journal article supplement (doi:10.5194/se-12-835-2021), 2021-04-15
Supplement: Supplementary file 1 [file Supplementary Table 10_AD-PO-57.xls]

## Sheet: PlotDat0
Source sheet	all data	0.593587	0.0751443	0	0	0.217708	0.0315113	0.644066	0.080038	0.68813	0.0844357	0.695139	0.0853065	0.705255	0.0856932	0.744625	0.0883154	0.757508	0.0923195	0.749258	0.0927748	0.803673	0.0944338	0.834495	0.0939751	0.815106	0.0950134	0.815631	0.0963295	0.828097	0.0979337	0.814759	0.0972361	0.840789	0.0982991	0.851419	0.098059	0.845207	0.0992022	0.850366	0.0980578	0.855772	0.0995002	0.869253	0.0990856	0.828764	0.101239	0.85879	0.101477
Plot name	Concordia0	0.6309	0.0793536	0.131529	0.0196543	0.482812	0.0640155	0.641948	0.0805976	0.68573	0.0851487	0.692878	0.0858439	0.702916	0.0863006	0.741705	0.0893371	0.754883	0.0930924	0.7467	0.0935233	0.800503	0.0953509	0.829946	0.0955906	0.812157	0.0959454	0.812646	0.097259	0.825521	0.0983434	0.811699	0.0982604	0.837801	0.0992052	0.848006	0.0992252	0.842334	0.0999704	0.846703	0.099374	0.852811	0.100376	0.865557	0.100379	0.826041	0.101919	0.855892	0.102201
Plot Type	1	0.64117	0.0799316	0.280357	0.0396948	0.805631	0.097544	0.635911	0.0807154	0.678888	0.0853921	0.686427	0.0859023	0.696244	0.0864308	0.733345	0.0898931	0.747399	0.0933545	0.739412	0.0937617	0.791451	0.0956739	0.816807	0.0967222	0.803724	0.096366	0.804117	0.0976523	0.818144	0.0981942	0.802952	0.0987601	0.829262	0.0995738	0.838221	0.0998637	0.834129	0.100183	0.836176	0.100198	0.844346	0.100716	0.854944	0.101146	0.818275	0.102034	0.847616	0.102347
1st free col	213	0.649431	0.0804091	0.448761	0.0601292	1.19873	0.132129	0.626446	0.0803818	0.668159	0.0851463	0.67631	0.085477	0.685779	0.0860731	0.720222	0.0899383	0.73566	0.0930846	0.727983	0.0934706	0.777248	0.0953767	0.796144	0.0972783	0.79049	0.0962412	0.790736	0.0974776	0.806563	0.097498	0.789226	0.0986946	0.815863	0.0993749	0.822858	0.0999228	0.821255	0.099824	0.819635	0.100464	0.831065	0.100491	0.838275	0.101325	0.806095	0.101573	0.834632	0.101903
Sigma Level	2	0.674557	0.0835884	0.639315	0.0809653	1.67741	0.167804	0.614319	0.0796239	0.654411	0.0844313	0.663347	0.0846025	0.67237	0.0852565	0.7034	0.0894691	0.720619	0.0923046	0.71334	0.0926736	0.759047	0.0944834	0.76963	0.0972138	0.773528	0.095581	0.773586	0.0967489	0.791716	0.0963112	0.771634	0.0980693	0.798689	0.0986248	0.803162	0.0993977	0.804755	0.0989214	0.798422	0.10015	0.814042	0.0997211	0.816899	0.100901	0.790488	0.100575	0.817993	0.100904
Absolute Errs	FALSE	0.694892	0.0867878	0.854932	0.102211	2.2603	0.204603	0.600513	0.0785031	0.638758	0.0833048	0.648586	0.0833495	0.657102	0.0840472	0.684241	0.0885235	0.703493	0.0910776	0.696668	0.0914352	0.738322	0.0930662	0.739413	0.0965339	0.754211	0.094439	0.754058	0.0955255	0.774807	0.0947301	0.751601	0.0969347	0.779133	0.0973841	0.780727	0.098331	0.785968	0.0975485	0.774255	0.0992818	0.794656	0.0984675	0.792549	0.0999092	0.772717	0.0991195	0.799046	0.0994319
Symbol Type	1	0.688305	0.0872261	1.09891	0.123874	2.97009	0.242562	0.586145	0.0771102	0.622469	0.0818583	0.633225	0.0818197	0.641213	0.0825432	0.664298	0.087178	0.685671	0.0895031	0.679319	0.0898559	0.716751	0.09124	0.707941	0.0952937	0.734105	0.0929077	0.733732	0.0939063	0.757205	0.0928826	0.730749	0.0953829	0.758779	0.0957535	0.757373	0.096809	0.766413	0.0958168	0.749092	0.097929	0.77448	0.096832	0.767197	0.098429	0.754223	0.0973251	0.779326	0.0976053
Inverse Plot	FALSE	0.727886	0.0880178	1.37498	0.145963	3.83441	0.281716	0.57238	0.075558	0.606863	0.0802088	0.618507	0.0801369	0.625989	0.0808663	0.645186	0.0855418	0.668595	0.0877086	0.662698	0.0880635	0.696082	0.0891528	0.677764	0.0935937	0.714838	0.091111	0.714256	0.0920225	0.740336	0.0909185	0.710768	0.0935395	0.739274	0.0938649	0.73499	0.0949551	0.747677	0.0938664	0.724971	0.0962016	0.755146	0.0949472	0.742897	0.0965807	0.736505	0.095337	0.76043	0.0955725
Color Plot	TRUE	0.723925	0.0896179	1.68735	0.168486	4.8869	0.322105	0.560333	0.0739723	0.593204	0.0784901	0.605626	0.0784374	0.612665	0.0791524	0.628453	0.0837473	0.65365	0.0858395	0.648151	0.0862033	0.677989	0.0869736	0.651327	0.0915716	0.697971	0.0891947	0.697207	0.0900268	0.725566	0.0889969	0.693278	0.0915539	0.722201	0.0918714	0.715392	0.0929194	0.731276	0.0918553	0.703847	0.0942395	0.738221	0.0929657	0.721617	0.094514	0.720996	0.0933162	0.74389	0.0934981
3D plot	FALSE	0.744466	0.0896332	2.04082	0.191452	6.16853	0.363766	0.55098	0.0724816	0.582599	0.0768413	0.595624	0.076859	0.602319	0.0775403	0.615455	0.0819399	0.642046	0.0840472	0.636858	0.084426	0.663939	0.084879	0.630772	0.0893912	0.684871	0.0873139	0.683967	0.0880808	0.714093	0.0872735	0.679693	0.0895869	0.708941	0.0899345	0.700167	0.090867	0.718539	0.0899466	0.68743	0.0922018	0.725076	0.0910482	0.705082	0.0923964	0.708955	0.0914265	0.731046	0.0915501
Linear	FALSE	0.744219	0.0906407	2.44077	0.214869	7.72917	0.40674	0.545079	0.0712065	0.575907	0.075396	0.589312	0.0755295	0.595789	0.0761606	0.607246	0.0802661	0.634724	0.082477	0.629732	0.0828755	0.65507	0.0830387	0.617763	0.0872292	0.676599	0.085621	0.675609	0.0863422	0.706846	0.0858878	0.671117	0.0877979	0.700569	0.0882111	0.690547	0.088964	0.710498	0.0882948	0.677052	0.0902534	0.716777	0.0893498	0.694631	0.0903994	0.701356	0.089821	0.722938	0.0898865
Data Range	AC3:AG104	0.766254	0.0914429	2.89333	0.238746	9.62957	0.451068	0.543108	0.0702505	0.573671	0.0742714	0.587201	0.0745567	0.593606	0.075125	0.60449	0.0788615	0.632275	0.081256	0.627352	0.0816774	0.6521	0.0816018	0.613355	0.0852607	0.673825	0.0842531	0.672808	0.0849518	0.704411	0.0849522	0.668242	0.0863319	0.697763	0.0868408	0.687314	0.0873646	0.707805	0.0870337	0.673552	0.0885522	0.713996	0.0880083	0.69111	0.0886848	0.698814	0.0886297	0.720223	0.0886419
Filled Symbols	FALSE	0.741501	0.091784	3.40542	0.263093	11.9437	0.496793	0.545226	0.0696909	0.576071	0.0735585	0.589462	0.0740193	0.595945	0.0745176	0.60741	0.0778398	0.6349	0.0804831	0.629909	0.0809289	0.655269	0.0806846	0.617904	0.0836451	0.676774	0.0833211	0.675793	0.0840223	0.706987	0.0845424	0.671302	0.0853075	0.700751	0.0859347	0.690728	0.0861984	0.710678	0.0862656	0.677214	0.087236	0.716957	0.0871323	0.694806	0.0873915	0.701537	0.0879492	0.72312	0.0879172
ConcAge	FALSE	0.769276	0.0925699	3.98486	0.287918	14.7617	0.543959	0.551262	0.0695732	0.582912	0.073315	0.595912	0.0739608	0.602617	0.0743874	0.61577	0.0772838	0.642384	0.080221	0.637198	0.0806906	0.664322	0.0803616	0.631043	0.0825135	0.685207	0.0829005	0.684322	0.083629	0.714364	0.0846916	0.680049	0.0848078	0.709291	0.0855661	0.700512	0.0855599	0.718884	0.0860525	0.687742	0.0864116	0.725421	0.0867928	0.705419	0.0866243	0.709303	0.0878345	0.731396	0.0877711
ConcSwap	FALSE	0.769367	0.0927118	4.64051	0.313231	18.1931	0.592611	0.560727	0.0699067	0.593642	0.0735608	0.606029	0.0743861	0.613082	0.0747451	0.628892	0.0772386	0.654123	0.0804909	0.648627	0.0809817	0.678524	0.0806588	0.651706	0.0819574	0.698441	0.0830253	0.697703	0.0838038	0.725945	0.0853878	0.693775	0.0848733	0.72269	0.085765	0.715875	0.0855008	0.731758	0.0864119	0.704282	0.0861456	0.738703	0.0870172	0.722088	0.0864453	0.721483	0.0882951	0.74438	0.0882154
1st Symbol-row	1	0.776506	0.093118	5.3824	0.339042	22.3716	0.642797	0.572854	0.0706646	0.60739	0.0742759	0.618993	0.0752607	0.626491	0.0755617	0.645714	0.0777078	0.669164	0.0812709	0.66327	0.0817787	0.696725	0.0815522	0.67822	0.0820219	0.715403	0.0836855	0.714853	0.0845324	0.740792	0.0865746	0.711367	0.0854987	0.739863	0.0865151	0.735572	0.0860259	0.748257	0.0873146	0.725495	0.0864596	0.755726	0.0877874	0.743464	0.0868691	0.737091	0.0892934	0.761019	0.0892142
		0.761959	0.093305	6.22187	0.365359	27.4597	0.694563	0.586661	0.0717854	0.623042	0.0754023	0.633753	0.0765136	0.641759	0.076771	0.664873	0.0786534	0.68629	0.0824979	0.679942	0.083017	0.717451	0.0829694	0.708437	0.0827018	0.73472	0.0848275	0.734381	0.0857559	0.757701	0.0881557	0.7314	0.0866332	0.759419	0.0877558	0.758006	0.0870926	0.767045	0.0886874	0.749662	0.0873282	0.775111	0.0890411	0.767814	0.0878612	0.754861	0.0907488	0.779966	0.0906865
		0.784884	0.0937543	7.17175	0.392195	33.6556	0.747961	0.601029	0.0731783	0.639332	0.0768488	0.649115	0.0780435	0.657648	0.078275	0.684816	0.0799989	0.704112	0.0840724	0.697291	0.0845963	0.739022	0.0847955	0.739909	0.083942	0.754826	0.0863588	0.754707	0.0873751	0.775303	0.0900032	0.752252	0.0881851	0.779774	0.0893864	0.781361	0.0886146	0.786599	0.0904192	0.774825	0.088681	0.795288	0.0906765	0.793166	0.0893414	0.773355	0.0925432	0.799687	0.0925131
		0.780182	0.0938852	8.24657	0.419557	IsoLine	IsoLine	0.614794	0.0747305	0.654938	0.0784983	0.663832	0.0797263	0.672872	0.0799519	0.703929	0.0816351	0.721188	0.0858669	0.713912	0.0863887	0.759691	0.0868828	0.770086	0.085642	0.774093	0.0881554	0.774183	0.0892588	0.792172	0.0919673	0.772233	0.0900285	0.799278	0.091275	0.803744	0.0904685	0.805336	0.0923696	0.798946	0.0904084	0.814622	0.0925613	0.817466	0.0911897	0.791074	0.0945313	0.818582	0.0945459
		0.763789	0.0949342	9.46276	0.447457			0.626841	0.0763162	0.668597	0.080217	0.676714	0.0814257	0.686197	0.0816658	0.720661	0.0834296	0.736133	0.087736	0.728458	0.0882489	0.777783	0.0890619	0.796522	0.0876641	0.79096	0.0900718	0.791232	0.0912546	0.806942	0.0938889	0.789723	0.0920141	0.816352	0.0932685	0.823341	0.0925042	0.821737	0.0943806	0.820071	0.0923705	0.831547	0.0945428	0.838746	0.0932564	0.806582	0.0965521	0.835122	0.0966203
		0.789506	0.0950592	10.8389	0.475906			0.636193	0.0778069	0.679201	0.0818658	0.686716	0.0830041	0.696542	0.0832779	0.733659	0.085237	0.747737	0.0895283	0.739752	0.0900263	0.791833	0.0911565	0.817078	0.0898445	0.80406	0.0919526	0.804472	0.0932005	0.818415	0.0956123	0.803308	0.0939811	0.829612	0.0952054	0.838567	0.0945566	0.834473	0.0962894	0.836487	0.0944082	0.844691	0.0964603	0.855281	0.095374	0.818624	0.0984418	0.847966	0.0985683
		0.791403	0.0952405	12.3961	0.504914			0.642094	0.079082	0.685893	0.0833111	0.693028	0.0843336	0.703072	0.0846576	0.741869	0.0869108	0.755059	0.0910985	0.746878	0.0915768	0.800702	0.0929968	0.830087	0.0920065	0.812332	0.0936455	0.81283	0.0949391	0.825662	0.096998	0.811885	0.09577	0.837984	0.0969288	0.848186	0.0964596	0.842514	0.0979412	0.846866	0.0963566	0.85299	0.0981587	0.865732	0.097371	0.826223	0.100047	0.856074	0.100232
		0.807396	0.0954873	14.158	0.534492			0.644066	0.080038	0.68813	0.0844357	0.695139	0.0853065	0.705255	0.0856932	0.744625	0.0883154	0.757508	0.0923195	0.749258	0.0927748	0.803673	0.0944338	0.834495	0.0939751	0.815106	0.0950134	0.815631	0.0963295	0.828097	0.0979337	0.814759	0.0972361	0.840789	0.0982991	0.851419	0.098059	0.845207	0.0992022	0.850366	0.0980578	0.855772	0.0995002	0.869253	0.0990856	0.828764	0.101239	0.85879	0.101477
		0.798659	0.096389	16.1518	0.564651
		0.774537	0.0964092	18.4077	0.595403
		0.813246	0.0974077	20.9604	0.62676
		0.796138	0.0978715	23.8488	0.658732
		0.833296	0.0979454	27.1171	0.691334
		0.79293	0.0980086	30.8153	0.724576
		0.831499	0.0981621	35	0.758471
		0.838337	0.0982723	35	0.758471
		0.814387	0.0982899	IsoLine	IsoLine
		0.836604	0.0985374
		0.821378	0.0987304
		0.855619	0.0995124
		0.830866	0.0995223
		0.835173	0.0997144
		0.833028	0.100115
		0.826569	0.100812
		0.830187	0.100977
		0.871098	0.101519
		0.861036	0.101939
		0.863529	0.101991
		0.852149	0.102611
		0.890402	0.102621
		0.850659	0.102978
		0.853714	0.103259
		0.89202	0.104148
		0.88937	0.104352
		0.890461	0.104927
		0.882294	0.105589
		0.890778	0.106913
		0.927643	0.107375
		0.899655	0.107795
		0.917626	0.107889
		0.897665	0.108163
		0.915876	0.10873
		0.916035	0.108767
		0.921323	0.109188
		0.916968	0.109496
		0.910534	0.109619
		0.952034	0.11021
		0.934171	0.111671
		0.936182	0.112125
		0.970239	0.112404
		0.956281	0.112726
		0.969323	0.112902
		0.974604	0.11532
		1.00856	0.115681
		1.06395	0.117692
		1.13589	0.124757
		1.26682	0.138513
		1.26961	0.140515
		1.39118	0.145328
		1.77209	0.178844
		1.70759	0.171975
		1.58128	0.165593
		1.63032	0.166203
		1.69145	0.169763
		2.31924	0.211867
		3.70191	0.275469
		5.56474	0.357639
		5.33084	0.341783
		5.62824	0.358587
		5.62716	0.353786
		5.8823	0.36278
		5.47817	0.336678
		5.34006	0.325111
		6.3117	0.378428
		6.52517	0.37116
		7.37143	0.412205
		7.14565	0.389294
		7.15408	0.38492
		7.80768	0.405584
		8.75851	0.416903
		10.9255	0.466534
		10.6063	0.446395
		13.7455	0.560081
		13.6104	0.532922
		13.6207	0.528115
		14.9863	0.561449
		24.5042	0.643131
		IsoLine	IsoLine
[truncated: 162 more columns]

## Sheet: PlotDat1
Source sheet	all data	0.593587	0.0751443	0	0	0.217708	0.0315113	0.644066	0.080038	0.68813	0.0844357	0.695139	0.0853065	0.705255	0.0856932	0.744625	0.0883154	0.757508	0.0923195	0.749258	0.0927748	0.803673	0.0944338	0.834495	0.0939751	0.815106	0.0950134	0.815631	0.0963295	0.828097	0.0979337	0.814759	0.0972361	0.840789	0.0982991	0.851419	0.098059	0.845207	0.0992022	0.850366	0.0980578	0.855772	0.0995002	0.869253	0.0990856	0.828764	0.101239	0.85879	0.101477
Plot name	Concordia0	0.6309	0.0793536	0.0558399	0.00859534	0.482812	0.0640155	0.641948	0.0805976	0.68573	0.0851487	0.692878	0.0858439	0.702916	0.0863006	0.741705	0.0893371	0.754883	0.0930924	0.7467	0.0935233	0.800503	0.0953509	0.832027	0.0952023	0.812157	0.0959454	0.812646	0.097259	0.825521	0.0983434	0.811699	0.0982604	0.837801	0.0992052	0.848006	0.0992252	0.842334	0.0999704	0.846703	0.099374	0.852811	0.100376	0.865557	0.100379	0.826041	0.101919	0.855892	0.102201
Plot Type	1	0.64117	0.0799316	0.114798	0.0172646	0.805631	0.097544	0.635911	0.0807154	0.678888	0.0853921	0.686427	0.0859023	0.696244	0.0864308	0.733345	0.0898931	0.747399	0.0933545	0.739412	0.0937617	0.791451	0.0956739	0.824834	0.0961855	0.803724	0.096366	0.804117	0.0976523	0.818144	0.0981942	0.802952	0.0987601	0.829262	0.0995738	0.838221	0.0998637	0.834129	0.100183	0.836176	0.100198	0.844346	0.100716	0.854944	0.101146	0.818275	0.102034	0.847616	0.102347
1st free col	213	0.649431	0.0804091	0.177048	0.0260083	1.19873	0.132129	0.626446	0.0803818	0.668159	0.0851463	0.67631	0.085477	0.685779	0.0860731	0.720222	0.0899383	0.73566	0.0930846	0.727983	0.0934706	0.777248	0.0953767	0.813231	0.0968816	0.79049	0.0962412	0.790736	0.0974776	0.806563	0.097498	0.789226	0.0986946	0.815863	0.0993749	0.822858	0.0999228	0.821255	0.099824	0.819635	0.100464	0.831065	0.100491	0.838275	0.101325	0.806095	0.101573	0.834632	0.101903
Sigma Level	2	0.674557	0.0835884	0.242774	0.0348272	1.67741	0.167804	0.614319	0.0796239	0.654411	0.0844313	0.663347	0.0846025	0.67237	0.0852565	0.7034	0.0894691	0.720619	0.0923046	0.71334	0.0926736	0.759047	0.0944834	0.797725	0.0972603	0.773528	0.095581	0.773586	0.0967489	0.791716	0.0963112	0.771634	0.0980693	0.798689	0.0986248	0.803162	0.0993977	0.804755	0.0989214	0.798422	0.10015	0.814042	0.0997211	0.816899	0.100901	0.790488	0.100575	0.817993	0.100904
Absolute Errs	FALSE	0.694892	0.0867878	0.31217	0.0437219	2.2603	0.204603	0.600513	0.0785031	0.638758	0.0833048	0.648586	0.0833495	0.657102	0.0840472	0.684241	0.0885235	0.703493	0.0910776	0.696668	0.0914352	0.738322	0.0930662	0.778993	0.097305	0.754211	0.094439	0.754058	0.0955255	0.774807	0.0947301	0.751601	0.0969347	0.779133	0.0973841	0.780727	0.098331	0.785968	0.0975485	0.774255	0.0992818	0.794656	0.0984675	0.792549	0.0999092	0.772717	0.0991195	0.799046	0.0994319
Symbol Type	1	0.688305	0.0872261	0.385442	0.0526931	2.97009	0.242562	0.586145	0.0771102	0.622469	0.0818583	0.633225	0.0818197	0.641213	0.0825432	0.664298	0.087178	0.685671	0.0895031	0.679319	0.0898559	0.716751	0.09124	0.757855	0.0970137	0.734105	0.0929077	0.733732	0.0939063	0.757205	0.0928826	0.730749	0.0953829	0.758779	0.0957535	0.757373	0.096809	0.766413	0.0958168	0.749092	0.097929	0.77448	0.096832	0.767197	0.098429	0.754223	0.0973251	0.779326	0.0976053
Inverse Plot	FALSE	0.727886	0.0880178	0.462805	0.0617413	3.83441	0.281716	0.57238	0.075558	0.606863	0.0802088	0.618507	0.0801369	0.625989	0.0808663	0.645186	0.0855418	0.668595	0.0877086	0.662698	0.0880635	0.696082	0.0891528	0.735233	0.0963992	0.714838	0.091111	0.714256	0.0920225	0.740336	0.0909185	0.710768	0.0935395	0.739274	0.0938649	0.73499	0.0949551	0.747677	0.0938664	0.724971	0.0962016	0.755146	0.0949472	0.742897	0.0965807	0.736505	0.095337	0.76043	0.0955725
Color Plot	TRUE	0.723925	0.0896179	0.544488	0.0708673	IsoLine	IsoLine	0.560333	0.0739723	0.593204	0.0784901	0.605626	0.0784374	0.612665	0.0791524	0.628453	0.0837473	0.65365	0.0858395	0.648151	0.0862033	0.677989	0.0869736	0.712118	0.0954883	0.697971	0.0891947	0.697207	0.0900268	0.725566	0.0889969	0.693278	0.0915539	0.722201	0.0918714	0.715392	0.0929194	0.731276	0.0918553	0.703847	0.0942395	0.738221	0.0929657	0.721617	0.094514	0.720996	0.0933162	0.74389	0.0934981
3D plot	FALSE	0.744466	0.0896332	0.630731	0.0800718			0.55098	0.0724816	0.582599	0.0768413	0.595624	0.076859	0.602319	0.0775403	0.615455	0.0819399	0.642046	0.0840472	0.636858	0.084426	0.663939	0.084879	0.689519	0.0943208	0.684871	0.0873139	0.683967	0.0880808	0.714093	0.0872735	0.679693	0.0895869	0.708941	0.0899345	0.700167	0.090867	0.718539	0.0899466	0.68743	0.0922018	0.725076	0.0910482	0.705082	0.0923964	0.708955	0.0914265	0.731046	0.0915501
Linear	FALSE	0.744219	0.0906407	0.721791	0.0893554			0.545079	0.0712065	0.575907	0.075396	0.589312	0.0755295	0.595789	0.0761606	0.607246	0.0802661	0.634724	0.082477	0.629732	0.0828755	0.65507	0.0830387	0.668423	0.0929478	0.676599	0.085621	0.675609	0.0863422	0.706846	0.0858878	0.671117	0.0877979	0.700569	0.0882111	0.690547	0.088964	0.710498	0.0882948	0.677052	0.0902534	0.716777	0.0893498	0.694631	0.0903994	0.701356	0.089821	0.722938	0.0898865
Data Range	AC3:AG104	0.766254	0.0914429	0.817936	0.0987188			0.543108	0.0702505	0.573671	0.0742714	0.587201	0.0745567	0.593606	0.075125	0.60449	0.0788615	0.632275	0.081256	0.627352	0.0816774	0.6521	0.0816018	0.649753	0.0914292	0.673825	0.0842531	0.672808	0.0849518	0.704411	0.0849522	0.668242	0.0863319	0.697763	0.0868408	0.687314	0.0873646	0.707805	0.0870337	0.673552	0.0885522	0.713996	0.0880083	0.69111	0.0886848	0.698814	0.0886297	0.720223	0.0886419
Filled Symbols	FALSE	0.741501	0.091784	0.919449	0.108163			0.545226	0.0696909	0.576071	0.0735585	0.589462	0.0740193	0.595945	0.0745176	0.60741	0.0778398	0.6349	0.0804831	0.629909	0.0809289	0.655269	0.0806846	0.634325	0.0898315	0.676774	0.0833211	0.675793	0.0840223	0.706987	0.0845424	0.671302	0.0853075	0.700751	0.0859347	0.690728	0.0861984	0.710678	0.0862656	0.677214	0.087236	0.716957	0.0871323	0.694806	0.0873915	0.701537	0.0879492	0.72312	0.0879172
ConcAge	FALSE	0.769276	0.0925699	1.02663	0.117688			0.551262	0.0695732	0.582912	0.073315	0.595912	0.0739608	0.602617	0.0743874	0.61577	0.0772838	0.642384	0.080221	0.637198	0.0806906	0.664322	0.0803616	0.622812	0.0882245	0.685207	0.0829005	0.684322	0.083629	0.714364	0.0846916	0.680049	0.0848078	0.709291	0.0855661	0.700512	0.0855599	0.718884	0.0860525	0.687742	0.0864116	0.725421	0.0867928	0.705419	0.0866243	0.709303	0.0878345	0.731396	0.0877711
ConcSwap	FALSE	0.769367	0.0927118	1.1398	0.127295			0.560727	0.0699067	0.593642	0.0735608	0.606029	0.0743861	0.613082	0.0747451	0.628892	0.0772386	0.654123	0.0804909	0.648627	0.0809817	0.678524	0.0806588	0.615719	0.0866783	0.698441	0.0830253	0.697703	0.0838038	0.725945	0.0853878	0.693775	0.0848733	0.72269	0.085765	0.715875	0.0855008	0.731758	0.0864119	0.704282	0.0861456	0.738703	0.0870172	0.722088	0.0864453	0.721483	0.0882951	0.74438	0.0882154
1st Symbol-row	1	0.776506	0.093118	1.25928	0.136984			0.572854	0.0706646	0.60739	0.0742759	0.618993	0.0752607	0.626491	0.0755617	0.645714	0.0777078	0.669164	0.0812709	0.66327	0.0817787	0.696725	0.0815522	0.613355	0.0852607	0.715403	0.0836855	0.714853	0.0845324	0.740792	0.0865746	0.711367	0.0854987	0.739863	0.0865151	0.735572	0.0860259	0.748257	0.0873146	0.725495	0.0864596	0.755726	0.0877874	0.743464	0.0868691	0.737091	0.0892934	0.761019	0.0892142
		0.761959	0.093305	1.38544	0.146757			0.586661	0.0717854	0.623042	0.0754023	0.633753	0.0765136	0.641759	0.076771	0.664873	0.0786534	0.68629	0.0824979	0.679942	0.083017	0.717451	0.0829694	0.615823	0.0840334	0.73472	0.0848275	0.734381	0.0857559	0.757701	0.0881557	0.7314	0.0866332	0.759419	0.0877558	0.758006	0.0870926	0.767045	0.0886874	0.749662	0.0873282	0.775111	0.0890411	0.767814	0.0878612	0.754861	0.0907488	0.779966	0.0906865
		0.784884	0.0937543	1.51864	0.156614			0.601029	0.0731783	0.639332	0.0768488	0.649115	0.0780435	0.657648	0.078275	0.684816	0.0799989	0.704112	0.0840724	0.697291	0.0845963	0.739022	0.0847955	0.623016	0.0830502	0.754826	0.0863588	0.754707	0.0873751	0.775303	0.0900032	0.752252	0.0881851	0.779774	0.0893864	0.781361	0.0886146	0.786599	0.0904192	0.774825	0.088681	0.795288	0.0906765	0.793166	0.0893414	0.773355	0.0925432	0.799687	0.0925131
		0.780182	0.0938852	1.65929	0.166555			0.614794	0.0747305	0.654938	0.0784983	0.663832	0.0797263	0.672872	0.0799519	0.703929	0.0816351	0.721188	0.0858669	0.713912	0.0863887	0.759691	0.0868828	0.634619	0.0823541	0.774093	0.0881554	0.774183	0.0892588	0.792172	0.0919673	0.772233	0.0900285	0.799278	0.091275	0.803744	0.0904685	0.805336	0.0923696	0.798946	0.0904084	0.814622	0.0925613	0.817466	0.0911897	0.791074	0.0945313	0.818582	0.0945459
		0.763789	0.0949342	1.80778	0.176582			0.626841	0.0763162	0.668597	0.080217	0.676714	0.0814257	0.686197	0.0816658	0.720661	0.0834296	0.736133	0.087736	0.728458	0.0882489	0.777783	0.0890619	0.650125	0.0819754	0.79096	0.0900718	0.791232	0.0912546	0.806942	0.0938889	0.789723	0.0920141	0.816352	0.0932685	0.823341	0.0925042	0.821737	0.0943806	0.820071	0.0923705	0.831547	0.0945428	0.838746	0.0932564	0.806582	0.0965521	0.835122	0.0966203
		0.789506	0.0950592	1.96457	0.186695			0.636193	0.0778069	0.679201	0.0818658	0.686716	0.0830041	0.696542	0.0832779	0.733659	0.085237	0.747737	0.0895283	0.739752	0.0900263	0.791833	0.0911565	0.668857	0.0819307	0.80406	0.0919526	0.804472	0.0932005	0.818415	0.0956123	0.803308	0.0939811	0.829612	0.0952054	0.838567	0.0945566	0.834473	0.0962894	0.836487	0.0944082	0.844691	0.0964603	0.855281	0.095374	0.818624	0.0984418	0.847966	0.0985683
		0.791403	0.0952405	2.13011	0.196895			0.642094	0.079082	0.685893	0.0833111	0.693028	0.0843336	0.703072	0.0846576	0.741869	0.0869108	0.755059	0.0910985	0.746878	0.0915768	0.800702	0.0929968	0.689995	0.082222	0.812332	0.0936455	0.81283	0.0949391	0.825662	0.096998	0.811885	0.09577	0.837984	0.0969288	0.848186	0.0964596	0.842514	0.0979412	0.846866	0.0963566	0.85299	0.0981587	0.865732	0.097371	0.826223	0.100047	0.856074	0.100232
		0.807396	0.0954873	2.30489	0.207183			0.644066	0.080038	0.68813	0.0844357	0.695139	0.0853065	0.705255	0.0856932	0.744625	0.0883154	0.757508	0.0923195	0.749258	0.0927748	0.803673	0.0944338	0.712617	0.0828365	0.815106	0.0950134	0.815631	0.0963295	0.828097	0.0979337	0.814759	0.0972361	0.840789	0.0982991	0.851419	0.098059	0.845207	0.0992022	0.850366	0.0980578	0.855772	0.0995002	0.869253	0.0990856	0.828764	0.101239	0.85879	0.101477
		0.798659	0.096389	2.48944	0.217559																			0.735732	0.0837474
		0.774537	0.0964092	2.68428	0.228024																			0.758331	0.0849149
		0.813246	0.0974077	2.89001	0.23858																			0.779427	0.0862879
		0.796138	0.0978715	3.10723	0.249226																			0.798097	0.0878065
		0.833296	0.0979454	3.33658	0.259963																			0.813525	0.0894042
		0.79293	0.0980086	3.57873	0.270793																			0.825038	0.0910112
		0.831499	0.0981621	3.83441	0.281716																			0.832131	0.0925574
		0.838337	0.0982723	4	0.288474																			0.834495	0.0939751
		0.814387	0.0982899	IsoLine	IsoLine
		0.836604	0.0985374
		0.821378	0.0987304
		0.855619	0.0995124
		0.830866	0.0995223
		0.835173	0.0997144
		0.833028	0.100115
		0.826569	0.100812
		0.830187	0.100977
		0.871098	0.101519
		0.861036	0.101939
		0.863529	0.101991
		0.852149	0.102611
		0.890402	0.102621
		0.850659	0.102978
		0.853714	0.103259
		0.89202	0.104148
		0.88937	0.104352
		0.890461	0.104927
		0.882294	0.105589
		0.890778	0.106913
		0.927643	0.107375
		0.899655	0.107795
		0.917626	0.107889
		0.897665	0.108163
		0.915876	0.10873
		0.916035	0.108767
		0.921323	0.109188
		0.916968	0.109496
		0.910534	0.109619
		0.952034	0.11021
		0.934171	0.111671
		0.936182	0.112125
		0.970239	0.112404
		0.956281	0.112726
		0.969323	0.112902
		0.974604	0.11532
		1.00856	0.115681
		1.06395	0.117692
		1.13589	0.124757
		1.26682	0.138513
		1.26961	0.140515
		1.39118	0.145328
		1.77209	0.178844
		1.70759	0.171975
		1.58128	0.165593
		1.63032	0.166203
		1.69145	0.169763
		2.31924	0.211867
		3.70191	0.275469
		5.56474	0.357639
		5.33084	0.341783
		5.62824	0.358587
		5.62716	0.353786
		5.8823	0.36278
		5.47817	0.336678
		5.34006	0.325111
		6.3117	0.378428
		6.52517	0.37116
		7.37143	0.412205
		7.14565	0.389294
		7.15408	0.38492
		7.80768	0.405584
		8.75851	0.416903
		10.9255	0.466534
		10.6063	0.446395
		13.7455	0.560081
		13.6104	0.532922
		13.6207	0.528115
		14.9863	0.561449
		24.5042	0.643131
		IsoLine	IsoLine
[truncated: 162 more columns]

## Sheet: PlotDat2
Source sheet	all data	0.593587	0.0751443	0	0	0.103498	0.0156334	0.644066	0.080038	0.68813	0.0844357	0.695139	0.0853065	0.705255	0.0856932	0.744625	0.0883154	0.757508	0.0923195	0.749258	0.0927748	0.803673	0.0944338	0.834495	0.0939751	0.815106	0.0950134	0.815631	0.0963295	0.828097	0.0979337	0.814759	0.0972361	0.840789	0.0982991	0.851419	0.098059	0.845207	0.0992022	0.850366	0.0980578	0.855772	0.0995002	0.869253	0.0990856	0.828764	0.101239	0.85879	0.101477
Plot name	Concordia0	0.6309	0.0793536	0.0345435	0.00536346	0.217708	0.0315113	0.641948	0.0805976	0.68573	0.0851487	0.692878	0.0858439	0.702916	0.0863006	0.743033	0.0891074	0.754883	0.0930924	0.7467	0.0935233	0.801943	0.0951622	0.832027	0.0952023	0.813498	0.0957444	0.814002	0.0970612	0.825521	0.0983434	0.81309	0.0980359	0.839159	0.0990138	0.84956	0.0989626	0.843639	0.099818	0.848374	0.0990673	0.854156	0.100193	0.867241	0.100082	0.826041	0.101919	0.855892	0.102201
Plot Type	1	0.64117	0.0799316	0.0702803	0.0107557	0.343738	0.0476374	0.635911	0.0807154	0.678888	0.0853921	0.686427	0.0859023	0.696244	0.0864308	0.738449	0.0896582	0.747399	0.0933545	0.739412	0.0937617	0.796977	0.0955783	0.824834	0.0961855	0.808872	0.0962084	0.809323	0.0975123	0.818144	0.0981942	0.808292	0.0985624	0.834475	0.099447	0.844195	0.099593	0.839138	0.100141	0.842605	0.099825	0.849514	0.100604	0.861425	0.100807	0.818275	0.102034	0.847616	0.102347
1st free col	213	0.649431	0.0804091	0.107252	0.0161768	0.482812	0.0640155	0.626446	0.0803818	0.668159	0.0851463	0.67631	0.085477	0.685779	0.0860731	0.731072	0.0899437	0.73566	0.0930846	0.727983	0.0934706	0.788991	0.0956641	0.813231	0.0968816	0.801432	0.096385	0.801799	0.097663	0.806563	0.097498	0.800575	0.0987927	0.826941	0.0995795	0.835561	0.0999227	0.831899	0.100157	0.833312	0.100298	0.842046	0.100716	0.852058	0.10123	0.806095	0.101573	0.834632	0.101903
Sigma Level	2	0.674557	0.0835884	0.1455	0.0216271	0.636279	0.0806498	0.614319	0.0796239	0.654411	0.0844313	0.663347	0.0846025	0.67237	0.0852565	0.721226	0.0899515	0.720619	0.0923046	0.71334	0.0926736	0.778334	0.0954156	0.797725	0.0972603	0.791502	0.0962665	0.791759	0.0975068	0.791716	0.0963112	0.790276	0.0987167	0.816887	0.0994057	0.824033	0.0999372	0.822239	0.0998655	0.820901	0.100465	0.83208	0.100524	0.83955	0.101332	0.790488	0.100575	0.817993	0.100904
Absolute Errs	FALSE	0.694892	0.0867878	0.18507	0.0271065	0.805631	0.097544	0.600513	0.0785031	0.638758	0.0833048	0.648586	0.0833495	0.657102	0.0840472	0.70934	0.0896811	0.703493	0.0910776	0.696668	0.0914352	0.765473	0.0948439	0.778993	0.097305	0.779517	0.0958581	0.779641	0.0970506	0.774807	0.0947301	0.777845	0.0983377	0.804752	0.0989332	0.810116	0.099636	0.81058	0.099279	0.805913	0.100319	0.820052	0.100036	0.824447	0.101108	0.772717	0.0991195	0.799046	0.0994319
Symbol Type	1	0.688305	0.0872261	0.226006	0.0326154	0.99251	0.114702	0.586145	0.0771102	0.622469	0.0818583	0.633225	0.0818197	0.641213	0.0825432	0.695933	0.0891445	0.685671	0.0895031	0.679319	0.0898559	0.750969	0.0939738	0.757855	0.0970137	0.765999	0.0951777	0.765975	0.0963142	0.757205	0.0928826	0.763826	0.0976723	0.791067	0.0981826	0.794418	0.0990321	0.797433	0.0984232	0.789004	0.0998665	0.806486	0.0992728	0.80741	0.100569	0.754223	0.0973251	0.779326	0.0976053
Inverse Plot	FALSE	0.727886	0.0880178	0.268357	0.0381538	1.19873	0.132129	0.57238	0.075558	0.606863	0.0802088	0.618507	0.0801369	0.625989	0.0808663	0.681592	0.0883651	0.668595	0.0877086	0.662698	0.0880635	0.735456	0.0928434	0.735233	0.0963992	0.75154	0.0942549	0.751358	0.0953299	0.740336	0.0909185	0.748831	0.0967495	0.77643	0.0971866	0.777625	0.098152	0.78337	0.0973356	0.770913	0.0991274	0.791976	0.0982688	0.789182	0.0997378	0.736505	0.095337	0.76043	0.0955725
Color Plot	TRUE	0.723925	0.0896179	0.31217	0.0437219	1.42629	0.149828	0.560333	0.0739723	0.593204	0.0784901	0.605626	0.0784374	0.612665	0.0791524	0.666944	0.0873769	0.65365	0.0858395	0.648151	0.0862033	0.719613	0.0915021	0.712118	0.0954883	0.736773	0.0931301	0.736429	0.0941406	0.725566	0.0889969	0.733516	0.0956097	0.761479	0.0959889	0.760472	0.0970341	0.769008	0.0960636	0.752431	0.0981338	0.777157	0.0970676	0.770561	0.0986506	0.720996	0.0933162	0.74389	0.0934981
3D plot	FALSE	0.744466	0.0896332	0.357497	0.0493199	1.67741	0.167804	0.55098	0.0724816	0.582599	0.0768413	0.595624	0.076859	0.602319	0.0775403	0.652629	0.0862231	0.642046	0.0840472	0.636858	0.084426	0.704131	0.0900085	0.689519	0.0943208	0.722341	0.0918526	0.72184	0.0927983	0.714093	0.0872735	0.718549	0.0943027	0.74687	0.0946418	0.743707	0.0957273	0.754973	0.0946629	0.734366	0.0969291	0.762675	0.0957216	0.752361	0.0973551	0.708955	0.0914265	0.731046	0.0915501
Linear	FALSE	0.744219	0.0906407	0.40439	0.0549478	IsoLine	IsoLine	0.545079	0.0712065	0.575907	0.075396	0.589312	0.0755295	0.595789	0.0761606	0.639272	0.0849542	0.634724	0.082477	0.629732	0.0828755	0.689687	0.0884279	0.668423	0.0929478	0.708876	0.090478	0.70823	0.0913618	0.706846	0.0858878	0.704586	0.0928856	0.73324	0.0932041	0.728063	0.0942887	0.741879	0.0931947	0.717506	0.0955661	0.749163	0.0942896	0.735376	0.095908	0.701356	0.089821	0.722938	0.0898865
Data Range	AC3:AG104	0.766254	0.0914429	0.452903	0.060606			0.543108	0.0702505	0.573671	0.0742714	0.587201	0.0745567	0.593606	0.075125	0.627457	0.0836255	0.632275	0.081256	0.627352	0.0816774	0.676912	0.0868294	0.649753	0.0914292	0.696967	0.0890665	0.696192	0.0898937	0.704411	0.0849522	0.692236	0.0914203	0.721184	0.0917387	0.714225	0.0927813	0.730299	0.0917231	0.702589	0.0941042	0.737213	0.0928341	0.72035	0.0943725	0.698814	0.0886297	0.720223	0.0886419
Filled Symbols	FALSE	0.741501	0.091784	0.503091	0.0662945			0.545226	0.0696909	0.576071	0.0735585	0.589462	0.0740193	0.595945	0.0745176	0.617701	0.0822953	0.6349	0.0804831	0.629909	0.0809289	0.666366	0.0852828	0.634325	0.0898315	0.687134	0.0876797	0.686254	0.0884583	0.706987	0.0845424	0.68204	0.089971	0.711231	0.0903096	0.702797	0.0912707	0.720738	0.0903125	0.690267	0.0926074	0.727347	0.0914189	0.707938	0.0928157	0.701537	0.0879492	0.72312	0.0879172
ConcAge	FALSE	0.769276	0.0925699	0.555013	0.0720136			0.551262	0.0695732	0.582912	0.073315	0.595912	0.0739608	0.602617	0.0743874	0.610429	0.0810216	0.642384	0.080221	0.637198	0.0806906	0.658508	0.0838557	0.622812	0.0882245	0.679806	0.0863784	0.678849	0.0871182	0.714364	0.0846916	0.674441	0.0886009	0.703814	0.0889793	0.694278	0.0898232	0.713615	0.0890245	0.681078	0.0911411	0.719994	0.0901058	0.698684	0.0913057	0.709303	0.0878345	0.731396	0.0877711
ConcSwap	FALSE	0.769367	0.0927118	0.608729	0.0777633			0.560727	0.0699067	0.593642	0.0735608	0.606029	0.0743861	0.613082	0.0747451	0.60596	0.07986	0.654123	0.0804909	0.648627	0.0809817	0.653682	0.0826106	0.615719	0.0866783	0.675304	0.0852193	0.674301	0.0859321	0.725945	0.0853878	0.669774	0.0873699	0.699259	0.087806	0.68904	0.0885019	0.70924	0.0879154	0.675424	0.0897694	0.715478	0.0889521	0.692992	0.0899083	0.721483	0.0882951	0.74438	0.0882154
1st Symbol-row	1	0.776506	0.093118	0.6643	0.0835438			0.572854	0.0706646	0.60739	0.0742759	0.618993	0.0752607	0.626491	0.0755617	0.60449	0.0788615	0.669164	0.0812709	0.66327	0.0817787	0.6521	0.0816018	0.613355	0.0852607	0.673825	0.0842531	0.672808	0.0849518	0.740792	0.0865746	0.668242	0.0863319	0.697763	0.0868408	0.687314	0.0873646	0.707805	0.0870337	0.673552	0.0885522	0.713996	0.0880083	0.69111	0.0886848	0.737091	0.0892934	0.761019	0.0892142
		0.761959	0.093305	0.721791	0.0893554			0.586661	0.0717854	0.623042	0.0754023	0.633753	0.0765136	0.641759	0.076771	0.606081	0.0780695	0.68629	0.0824979	0.679942	0.083017	0.653829	0.0808734	0.615823	0.0840334	0.675434	0.0835221	0.674437	0.0842201	0.757701	0.0881557	0.669911	0.0855321	0.699394	0.0861261	0.689173	0.086461	0.709373	0.0864179	0.675543	0.0875427	0.715611	0.0873156	0.693122	0.0876886	0.754861	0.0907488	0.779966	0.0906865
		0.784884	0.0937543	0.781268	0.0951981			0.601029	0.0731783	0.639332	0.0768488	0.649115	0.0780435	0.657648	0.078275	0.610665	0.0775187	0.704112	0.0840724	0.697291	0.0845963	0.658796	0.0804572	0.623016	0.0830502	0.680059	0.0830581	0.679116	0.0837691	0.775303	0.0900032	0.674709	0.0850055	0.704078	0.0856929	0.694538	0.0858305	0.713874	0.0860949	0.681312	0.086785	0.720254	0.0869044	0.698938	0.0869632	0.773355	0.0925432	0.799687	0.0925131
		0.780182	0.0938852	0.842799	0.101072			0.614794	0.0747305	0.654938	0.0784983	0.663832	0.0797263	0.672872	0.0799519	0.618042	0.0772331	0.721188	0.0858669	0.713912	0.0863887	0.666782	0.0803715	0.634619	0.0823541	0.687499	0.0828815	0.686639	0.0836183	0.792172	0.0919673	0.682426	0.0847752	0.711611	0.0855604	0.703173	0.0855009	0.721113	0.0860789	0.690605	0.0863123	0.727722	0.0867924	0.708305	0.0865403	0.791074	0.0945313	0.818582	0.0945459
		0.763789	0.0949342	0.906456	0.106978			0.626841	0.0763162	0.668597	0.080217	0.676714	0.0814257	0.686197	0.0816658	0.627889	0.0772254	0.736133	0.087736	0.728458	0.0882489	0.677438	0.0806199	0.650125	0.0819754	0.697429	0.083	0.69668	0.0837745	0.806942	0.0938889	0.692725	0.0848512	0.721665	0.0857341	0.7147	0.0854864	0.730773	0.0863705	0.703017	0.0861453	0.737687	0.0869848	0.720813	0.0864384	0.806582	0.0965521	0.835122	0.0966203
		0.789506	0.0950592	0.972312	0.112915			0.636193	0.0778069	0.679201	0.0818658	0.686716	0.0830041	0.696542	0.0832779	0.639775	0.0774957	0.747737	0.0895283	0.739752	0.0900263	0.690299	0.0811917	0.668857	0.0819307	0.709415	0.0834084	0.708798	0.0842307	0.818415	0.0956123	0.705156	0.0852302	0.7338	0.0862067	0.728617	0.0857876	0.742432	0.086957	0.718004	0.0862911	0.749716	0.087473	0.735916	0.086662	0.818624	0.0984418	0.847966	0.0985683
		0.791403	0.0952405	1.04044	0.118884			0.642094	0.079082	0.685893	0.0833111	0.693028	0.0843336	0.703072	0.0846576	0.653181	0.0780324	0.755059	0.0910985	0.746878	0.0915768	0.704803	0.0820618	0.689995	0.082222	0.722932	0.0840888	0.722464	0.0849671	0.825662	0.096998	0.719175	0.0858957	0.747485	0.0869573	0.744315	0.0863915	0.75558	0.0878128	0.734913	0.0867435	0.763281	0.0882358	0.752953	0.0872012	0.826223	0.100047	0.856074	0.100232
		0.807396	0.0954873	1.11093	0.124885			0.644066	0.080038	0.68813	0.0844357	0.695139	0.0853065	0.705255	0.0856932	0.667522	0.0788118	0.757508	0.0923195	0.749258	0.0927748	0.720316	0.0831922	0.712617	0.0828365	0.737391	0.0850116	0.737081	0.0859515	0.828097	0.0979337	0.73417	0.0868185	0.762123	0.0879533	0.761108	0.0872716	0.769642	0.0889004	0.753004	0.0874826	0.777791	0.0892397	0.771181	0.0880326	0.828764	0.101239	0.85879	0.101477
		0.798659	0.096389	1.18385	0.130918											0.68217	0.0798					0.73616	0.0845335	0.735732	0.0837474	0.752159	0.0861363	0.75201	0.0871408			0.749485	0.0879583	0.777073	0.089151	0.778262	0.0883895	0.784005	0.0901724	0.771486	0.0884762	0.792611	0.0904409	0.789802	0.0891198
		0.774537	0.0964092	1.25928	0.136984											0.696486	0.0809538					0.751642	0.0860271	0.758331	0.0849149	0.76659	0.0874139	0.766599	0.088483			0.764452	0.0892653	0.791683	0.0904981	0.795027	0.0896963	0.798039	0.0915731	0.789552	0.0896809	0.807093	0.0917869	0.808002	0.0904153
		0.813246	0.0974077	1.33733	0.143082											0.709843	0.0822227					0.766086	0.0876076	0.779427	0.0862879	0.780055	0.0887885	0.780209	0.0899196			0.778415	0.0906824	0.805313	0.0919358	0.81067	0.0911348	0.811133	0.0930413	0.806411	0.0910439	0.820604	0.093219	0.824987	0.0918624
		0.796138	0.0978715	1.41807	0.149213											0.721658	0.0835513					0.77886	0.0892062	0.798097	0.0878065	0.791964	0.0902	0.792247	0.0913876			0.790765	0.0921476	0.817368	0.0934012	0.824508	0.0926423	0.822713	0.0945128	0.821328	0.0925058	0.832554	0.0946744	0.840013	0.0933979
		0.833296	0.0979454	1.50159	0.155377											0.731414	0.0848816					0.789407	0.0907527	0.813525	0.0894042	0.801798	0.0915867	0.802185	0.0928231			0.800962	0.0935969	0.827322	0.0948303	0.835937	0.0941529	0.832274	0.0959234	0.833651	0.0940026	0.842421	0.0960896	0.852425	0.0949547
		0.79293	0.0980086	1.58801	0.161574											0.738685	0.0861553					0.797264	0.0921798	0.825038	0.0910112	0.809125	0.0928881	0.80959	0.0941631			0.80856	0.094967	0.834738	0.0961605	0.844456	0.0956004	0.839397	0.0972114	0.84284	0.0954689	0.849773	0.0974027	0.861679	0.0964647
		0.831499	0.0981621	1.67741	0.167804											0.743154	0.0873168					0.80209	0.0934249	0.832131	0.0925574	0.813627	0.0940472	0.814138	0.0953492			0.813227	0.096198	0.839294	0.0973339	0.849693	0.0969217	0.843772	0.0983205	0.848494	0.0968406	0.854289	0.0985564	0.867371	0.0978621
		0.838337	0.0982723	1.76989	0.174067											0.744625	0.0883154					0.803673	0.0944338	0.834495	0.0939751	0.815106	0.0950134	0.815631	0.0963295			0.814759	0.0972361	0.840789	0.0982991	0.851419	0.098059	0.845207	0.0992022	0.850366	0.0980578	0.855772	0.0995002	0.869253	0.0990856
		0.814387	0.0982899	1.8	0.176049
		0.836604	0.0985374	IsoLine	IsoLine
		0.821378	0.0987304
		0.855619	0.0995124
		0.830866	0.0995223
		0.835173	0.0997144
		0.833028	0.100115
		0.826569	0.100812
		0.830187	0.100977
		0.871098	0.101519
		0.861036	0.101939
		0.863529	0.101991
		0.852149	0.102611
		0.890402	0.102621
		0.850659	0.102978
		0.853714	0.103259
		0.89202	0.104148
		0.88937	0.104352
		0.890461	0.104927
		0.882294	0.105589
		0.890778	0.106913
		0.927643	0.107375
		0.899655	0.107795
		0.917626	0.107889
		0.897665	0.108163
		0.915876	0.10873
		0.916035	0.108767
		0.921323	0.109188
		0.916968	0.109496
		0.910534	0.109619
		0.952034	0.11021
		0.934171	0.111671
		0.936182	0.112125
		0.970239	0.112404
		0.956281	0.112726
		0.969323	0.112902
		0.974604	0.11532
		1.00856	0.115681
		1.06395	0.117692
		1.13589	0.124757
		1.26682	0.138513
		1.26961	0.140515
		1.39118	0.145328
		1.77209	0.178844
		1.70759	0.171975
		1.58128	0.165593
		1.63032	0.166203
		1.69145	0.169763
		2.31924	0.211867
		3.70191	0.275469
		5.56474	0.357639
		5.33084	0.341783
		5.62824	0.358587
		5.62716	0.353786
		5.8823	0.36278
		5.47817	0.336678
		5.34006	0.325111
		6.3117	0.378428
		6.52517	0.37116
		7.37143	0.412205
		7.14565	0.389294
		7.15408	0.38492
		7.80768	0.405584
		8.75851	0.416903
		10.9255	0.466534
		10.6063	0.446395
		13.7455	0.560081
		13.6104	0.532922
		13.6207	0.528115
		14.9863	0.561449
		24.5042	0.643131
		IsoLine	IsoLine
[truncated: 162 more columns]

## Sheet: PlotDat3
Source sheet	all data	0.593587	0.0751443	0.543504	0.0706383	0.574259	0.0739651	0.605627	0.0773023	0.637621	0.0806498	0.670251	0.0840077	0.703532	0.087376	0.52	0.068175	0.52	0.0680531	0.52	0.0682969	0.512308	0.0673218	0.644066	0.080038	0.68813	0.0844357	0.695139	0.0853065	0.65883	0.0816446
Plot name	Concordia1	0.6309	0.0793536	0.543459	0.0706652	0.574211	0.0739934	0.605576	0.0773318	0.637566	0.0806807	0.670194	0.08404	0.703471	0.0874097	0.52	0.068175	0.52	0.0680531	0.52	0.0682969	0.542391	0.0706383	0.643538	0.0803647	0.687533	0.0848401	0.694577	0.0856272	0.658276	0.0819289
Plot Type	1	0.64117	0.0799316	0.543327	0.07069	0.574071	0.0740194	0.605427	0.077359	0.637408	0.0807091	0.670025	0.0840696	0.703293	0.0874405	0.526132	0.0688526	0.526132	0.0687294	0.526132	0.0689758	0.573073	0.0739651	0.642038	0.0805898	0.685833	0.0851378	0.692975	0.085837	0.656695	0.0821054
1st free col	33	IsoLine	IsoLine	0.54312	0.0707106	0.57385	0.0740409	0.605192	0.0773816	0.637158	0.0807327	0.66976	0.0840942	0.703012	0.0874662	0.532288	0.0695306	0.532288	0.0694062	0.532288	0.069655	0.604365	0.0773023	0.639596	0.080709	0.683064	0.0853228	0.690365	0.085932	0.654128	0.0821694
Sigma Level	2			0.542853	0.0707253	0.573566	0.0740564	0.604889	0.0773978	0.636837	0.0807496	0.66942	0.0841119	0.702651	0.0874846	0.538469	0.070209	0.538469	0.0700834	0.538469	0.0703347	0.636279	0.0806498	0.636257	0.0807198	0.67928	0.0853917	0.686797	0.0859101	0.650647	0.082119
Absolute Errs	FALSE			0.54255	0.070733	0.573242	0.0740644	0.604545	0.0774062	0.63647	0.0807584	0.669031	0.084121	0.70224	0.0874941	0.544676	0.0708879	0.544676	0.070761	0.544676	0.0710148	0.668829	0.0840077	0.632088	0.0806221	0.674555	0.085343	0.682341	0.0857718	0.646346	0.0819557
Symbol Type	1			0.542233	0.070733	0.572904	0.0740644	0.604185	0.0774062	0.636089	0.0807584	0.668626	0.084121	0.701811	0.0874941	0.550907	0.0715672	0.550907	0.071439	0.550907	0.0716953	0.702025	0.087376	0.62717	0.0804177	0.668979	0.0851777	0.677084	0.0855199	0.641342	0.0816839
Inverse Plot	FALSE			0.541929	0.0707253	0.57258	0.0740564	0.603841	0.0773978	0.635722	0.0807496	0.668238	0.0841119	0.7014	0.0874846	0.557163	0.0722469	0.557163	0.0721175	0.557163	0.0723763	IsoLine	IsoLine	0.621598	0.0801107	0.662663	0.0848991	0.671128	0.0851592	0.635772	0.0813111
Color Plot	TRUE			0.541663	0.0707106	0.572296	0.0740409	0.603538	0.0773816	0.635401	0.0807327	0.667897	0.0840942	0.701039	0.0874662	0.563445	0.072927	0.563445	0.0727963	0.563445	0.0730577			0.615481	0.0797071	0.655728	0.0845126	0.664588	0.0846968	0.629788	0.0808473
3D plot	FALSE			0.541455	0.07069	0.572075	0.0740194	0.603303	0.077359	0.635151	0.0807091	0.667632	0.0840696	0.700758	0.0874405	0.569752	0.0736076	0.569752	0.0734757	0.569752	0.0737396			0.608938	0.0792146	0.64831	0.0840256	0.657593	0.0841416	0.623553	0.0803052
Linear	FALSE			0.541324	0.0706652	0.571935	0.0739934	0.603154	0.0773318	0.634993	0.0806807	0.667464	0.08404	0.70058	0.0874097	0.576084	0.0742886	0.576084	0.0741554	0.576084	0.0744218			0.602096	0.078643	0.640553	0.0834477	0.650279	0.0835045	0.617237	0.0796997
Data Range	AC3:AG5			0.541279	0.0706383	0.571887	0.0739651	0.603103	0.0773023	0.634938	0.0806498	0.667406	0.0840077	0.700519	0.087376	0.582442	0.0749701	0.582442	0.0748356	0.582442	0.0751046			0.595088	0.0780032	0.632608	0.0827901	0.642787	0.0827978	0.611013	0.0790472
Filled Symbols	FALSE			0.541324	0.0706113	0.571935	0.0739368	0.603154	0.0772727	0.634993	0.0806188	0.667464	0.0839754	0.70058	0.0873424	0.588825	0.075652	0.588825	0.0755162	0.588825	0.0757877			0.588051	0.0773078	0.62463	0.0820657	0.635263	0.0820354	0.605049	0.0783656
ConcAge	TRUE			0.541455	0.0705865	0.572075	0.0739108	0.603303	0.0772455	0.635151	0.0805904	0.667632	0.0839458	0.700758	0.0873116	0.595235	0.0763343	0.595235	0.0761973	0.595235	0.0764713			0.581122	0.0765702	0.616774	0.0812884	0.627855	0.081232	0.59951	0.0776734
ConcSwap	FALSE			0.541663	0.070566	0.572296	0.0738893	0.603538	0.0772229	0.635401	0.0805668	0.667897	0.0839212	0.701039	0.0872859	0.60167	0.077017	0.60167	0.0768787	0.60167	0.0771553			0.574435	0.0758049	0.609193	0.0804735	0.620705	0.0804033	0.594546	0.0769895
1st Symbol-row	1			0.541929	0.0705512	0.57258	0.0738738	0.603841	0.0772067	0.635722	0.0805499	0.668238	0.0839035	0.7014	0.0872675	0.608131	0.0777002	0.608131	0.0775606	0.608131	0.0778397			0.568122	0.0750268	0.602035	0.0796368	0.613954	0.0795654	0.590292	0.0763326
				0.542233	0.0705436	0.572904	0.0738658	0.604185	0.0771983	0.636089	0.0805411	0.668626	0.0838944	0.701811	0.087258	0.614618	0.0783838	0.614618	0.078243	0.614618	0.0785246			0.562303	0.0742509	0.595438	0.0787945	0.607733	0.0787346	0.586864	0.0757206
				0.54255	0.0705436	0.573242	0.0738658	0.604545	0.0771983	0.63647	0.0805411	0.669031	0.0838944	0.70224	0.087258	0.621132	0.0790678	0.621132	0.0789257	0.621132	0.0792099			0.557094	0.0734924	0.589532	0.0779632	0.602162	0.0779271	0.584357	0.0751702
				0.542853	0.0705512	0.573566	0.0738738	0.604889	0.0772067	0.636837	0.0805499	0.66942	0.0839035	0.702651	0.0872675	0.627671	0.0797523	0.627671	0.079609	0.627671	0.0798957			0.552595	0.0727661	0.58443	0.0771589	0.597351	0.0771586	0.582837	0.0746963
				0.54312	0.070566	0.57385	0.0738893	0.605192	0.0772229	0.637158	0.0805668	0.66976	0.0839212	0.703012	0.0872859	0.634237	0.0804372	0.634237	0.0802926	0.634237	0.0805819			0.548894	0.0720861	0.580234	0.0763973	0.593393	0.0764442	0.582348	0.074312
				0.543327	0.0705865	0.574071	0.0739108	0.605427	0.0772455	0.637408	0.0805904	0.670025	0.0839458	0.703293	0.0873116	0.64083	0.0811226	0.64083	0.0809767	0.64083	0.0812685			0.546063	0.0714656	0.577023	0.0756933	0.590364	0.0757976	0.582901	0.0740277
				0.543459	0.0706113	0.574211	0.0739368	0.605576	0.0772727	0.637566	0.0806188	0.670194	0.0839754	0.703471	0.0873424	0.647449	0.0818084	0.647449	0.0816612	0.647449	0.0819556			0.544157	0.0709167	0.574861	0.0750605	0.588324	0.0752314	0.584483	0.0738512
				0.543504	0.0706383	0.574259	0.0739651	0.605627	0.0773023	0.637621	0.0806498	0.670251	0.0840077	0.703532	0.087376	0.654095	0.0824946	0.654095	0.0823461	0.654095	0.0826431			0.543213	0.07045	0.57379	0.0745113	0.587313	0.0747567	0.58705	0.0737872
				ConcTikEll	ConcTikEll	ConcTikEll	ConcTikEll	ConcTikEll	ConcTikEll	ConcTikEll	ConcTikEll	ConcTikEll	ConcTikEll	ConcTikEll	ConcTikEll	0.660767	0.0831812	0.660767	0.0830315	0.660767	0.083331			0.543249	0.0700748	0.57383	0.0740563	0.587351	0.0743828	0.590531	0.0738375
																0.667467	0.0838683	0.667467	0.0837173	0.667467	0.0840194			0.544265	0.0697982	0.574982	0.0737044	0.588435	0.0741169	0.594832	0.0740008
																0.674193	0.0845558	0.674193	0.0844035	0.674193	0.0847082			0.546241	0.0696257	0.577221	0.0734625	0.590547	0.0739641	0.599836	0.0742726
																0.680947	0.0852438	0.680947	0.0850902	0.680947	0.0853974			0.549139	0.0695605	0.580506	0.0733352	0.593643	0.0739275	0.605406	0.0746455
																0.687728	0.0859322	0.687728	0.0857773	0.687728	0.0860871			0.552902	0.0696041	0.584771	0.0733251	0.597665	0.0740077	0.61139	0.0751093
																0.694536	0.086621	0.694536	0.0864648	0.694536	0.0867772			0.557457	0.0697555	0.589934	0.0734323	0.602533	0.0742033	0.617625	0.0756513
																0.701372	0.0873103	0.701372	0.0871528	0.701372	0.0874678			0.562714	0.0700118	0.595895	0.0736548	0.608153	0.0745103	0.623941	0.0762569
																0.708235	0.088	0.708235	0.0878412	0.706658	0.088			0.568573	0.070368	0.602536	0.0739882	0.614416	0.0749229	0.630165	0.0769093
																0.708235	0.088	0.709824	0.088	ConcBand	ConcBand			0.574919	0.0708171	0.60973	0.074426	0.6212	0.075433	0.636129	0.077591
																IsoLine	IsoLine	ConcBand	ConcBand					0.581628	0.0713505	0.617336	0.0749597	0.628373	0.0760306	0.641668	0.0782832
																								0.58857	0.0719577	0.625206	0.075579	0.635794	0.0767041	0.646632	0.078967
																								0.595609	0.0726269	0.633187	0.0762717	0.64332	0.0774405	0.650886	0.079624
																								0.602609	0.0733451	0.641123	0.0770244	0.650804	0.0782253	0.654314	0.080236
																								0.609434	0.0740984	0.648861	0.0778225	0.658101	0.0790434	0.656821	0.0807864
																								0.61595	0.074872	0.656248	0.0786503	0.665068	0.0798787	0.658341	0.0812603
																								0.622031	0.0756509	0.663143	0.0794918	0.67157	0.0807151	0.65883	0.0816446
																								0.627558	0.0764199	0.66941	0.0803307	0.677481	0.0815362	Cyan	Cyan
																								0.632424	0.0771641	0.674927	0.0811505	0.682684	0.0823261
																								0.636534	0.077869	0.679587	0.0819353	0.68708	0.0830694
																								0.639808	0.0785209	0.6833	0.0826699	0.690582	0.0837516
																								0.642182	0.079107	0.685993	0.08334	0.693122	0.0843594
																								0.643611	0.0796161	0.687613	0.0839324	0.694651	0.0848811
																								0.644066	0.080038	0.68813	0.0844357	0.695139	0.0853065

## Sheet: PlotDat4
Source sheet	all data	0.442219	0.0588051	0.412373	0.0557947	0.426375	0.0574338	0.440515	0.0590754	0.454796	0.0607196	0.469218	0.0623663	0.404831	0.055	0.405659	0.055	0.404007	0.055	0.411563	0.0557947	0.530881	0.0595039	0.467992	0.0606144	0.537202	0.0601257	0.475306	0.0616587	0.464628	0.0602735
Plot name	Concordia1	0.440946	0.0589657	0.41234	0.0558158	0.42634	0.0574556	0.44048	0.0590978	0.454759	0.0607426	0.46918	0.06239	0.404831	0.055	0.407446	0.0552108	0.404831	0.0550977	0.425533	0.0574338	0.530501	0.0597577	0.467714	0.060848	0.536825	0.0603472	0.475021	0.061899	0.464333	0.0604757
Plot Type	1	0.449139	0.0595977	0.412244	0.0558353	0.426241	0.0574756	0.440377	0.0591184	0.454652	0.0607638	0.469069	0.0624118	0.407446	0.0553091	0.410066	0.0555194	0.407446	0.0554074	0.439642	0.0590754	0.529367	0.0600033	0.466914	0.061045	0.5357	0.0605624	0.474201	0.062103	0.463473	0.0606483
1st free col	33	0.447538	0.0600419	0.412093	0.0558514	0.426084	0.0574922	0.440214	0.0591355	0.454483	0.0607814	0.468894	0.0624299	0.410066	0.0556182	0.41269	0.0558281	0.410066	0.0557171	0.45389	0.0607196	0.52749	0.0602387	0.465609	0.0612015	0.533836	0.0607694	0.472862	0.062267	0.462071	0.0607866
Sigma Level	2	IsoLine	IsoLine	0.411899	0.055863	0.425883	0.0575041	0.440005	0.0591478	0.454267	0.060794	0.46867	0.0624428	0.41269	0.0559275	0.41532	0.0561368	0.41269	0.0560269	0.46828	0.0623663	0.524886	0.0604619	0.463824	0.0613145	0.53125	0.0609664	0.47103	0.0623877	0.460166	0.0608867
Absolute Errs	FALSE			0.411678	0.055869	0.425653	0.0575103	0.439766	0.0591542	0.454019	0.0608006	0.468413	0.0624496	0.41532	0.0562368	0.417954	0.0564457	0.41532	0.0563368	IsoLine	IsoLine	0.521576	0.060671	0.461594	0.0613818	0.527963	0.0611517	0.46874	0.0624627	0.45781	0.060946
Symbol Type	1			0.411448	0.055869	0.425414	0.0575103	0.439518	0.0591542	0.453762	0.0608006	0.468146	0.0624496	0.417954	0.0565463	0.420594	0.0567547	0.417954	0.0566468			0.517589	0.0608641	0.458962	0.0614021	0.524004	0.0613237	0.466039	0.0624906	0.455067	0.0609629
Inverse Plot	FALSE			0.411226	0.055863	0.425184	0.0575041	0.439279	0.0591478	0.453514	0.060794	0.46789	0.0624428	0.420594	0.0568558	0.423238	0.0570637	0.420594	0.0569569			0.512959	0.0610396	0.455979	0.0613749	0.519406	0.061481	0.462977	0.0624708	0.452012	0.0609368
Color Plot	TRUE			0.411033	0.0558514	0.424982	0.0574922	0.43907	0.0591355	0.453297	0.0607814	0.467665	0.0624299	0.423238	0.0571654	0.425887	0.0573729	0.423238	0.0572671			0.507726	0.0611961	0.452704	0.0613009	0.514209	0.0616223	0.459614	0.0624037	0.448728	0.0608685
3D plot	FALSE			0.410882	0.0558353	0.424826	0.0574756	0.438907	0.0591184	0.453129	0.0607638	0.46749	0.0624118	0.425887	0.0574751	0.428541	0.0576821	0.425887	0.0575774			0.501934	0.0613322	0.4492	0.0611814	0.508456	0.0617462	0.456017	0.0622907	0.445305	0.0607599
Linear	FALSE			0.410786	0.0558158	0.424726	0.0574556	0.438804	0.0590978	0.453021	0.0607426	0.467379	0.06239	0.428541	0.0577849	0.431201	0.0579914	0.428541	0.0578878			0.495632	0.0614468	0.445535	0.0610187	0.502197	0.0618519	0.452254	0.0621339	0.441836	0.0606139
Data Range	AC3:AG6			0.410753	0.0557947	0.424692	0.0574338	0.438769	0.0590754	0.452985	0.0607196	0.467341	0.0623663	0.431201	0.0580948	0.433865	0.0583008	0.431201	0.0581982			0.488875	0.0615388	0.441781	0.0608162	0.495486	0.0619383	0.4484	0.0619364	0.438416	0.0604346
Filled Symbols	FALSE			0.410786	0.0557735	0.424726	0.057412	0.438804	0.059053	0.453021	0.0606965	0.467379	0.0623426	0.433865	0.0584048	0.436534	0.0586103	0.433865	0.0585088			0.481719	0.0616074	0.438011	0.0605776	0.488379	0.0620047	0.444529	0.061702	0.435138	0.0602267
ConcAge	TRUE			0.410882	0.0557541	0.424826	0.057392	0.438907	0.0590323	0.453129	0.0606753	0.46749	0.0623208	0.436534	0.0587149	0.439208	0.0589199	0.436534	0.0588194			0.474227	0.0616522	0.434297	0.0603076	0.480937	0.0620506	0.440716	0.0614353	0.432092	0.059996
ConcSwap	FALSE			0.411033	0.055738	0.424982	0.0573753	0.43907	0.0590152	0.453297	0.0606577	0.467665	0.0623027	0.439208	0.059025	0.441886	0.0592296	0.439208	0.0591301			0.466461	0.0616727	0.430714	0.0600115	0.473224	0.0620756	0.437037	0.0611415	0.42936	0.0597487
1st Symbol-row	1			0.411226	0.0557264	0.425184	0.0573634	0.439279	0.059003	0.453514	0.0606451	0.46789	0.0622897	0.441886	0.0593353	0.44457	0.0595394	0.441886	0.0594409			0.458489	0.0616687	0.427329	0.059695	0.465306	0.0620794	0.433561	0.0608263	0.427017	0.0594917
				0.411448	0.0557204	0.425414	0.0573572	0.439518	0.0589966	0.453762	0.0606385	0.468146	0.062283	0.44457	0.0596456	0.447259	0.0598493	0.44457	0.0597519			0.450378	0.0616403	0.424209	0.0593644	0.45725	0.0620621	0.430358	0.0604958	0.425127	0.0592319
				0.411678	0.0557204	0.425653	0.0573572	0.439766	0.0589966	0.454019	0.0606385	0.468413	0.062283	0.447259	0.0599561	0.449953	0.0601592	0.447259	0.0600629			0.442197	0.0615877	0.421416	0.059026	0.449124	0.0620237	0.427489	0.0601565	0.423742	0.0589763
				0.411899	0.0557264	0.425883	0.0573634	0.440005	0.059003	0.454267	0.0606451	0.46867	0.0622897	0.449953	0.0602666	0.452652	0.0604693	0.449953	0.060374			0.434016	0.0615113	0.419002	0.0586864	0.440999	0.0619647	0.42501	0.059815	0.422899	0.0587321
				0.412093	0.055738	0.426084	0.0573753	0.440214	0.0590152	0.454483	0.0606577	0.468894	0.0623027	0.452652	0.0605772	0.455356	0.0607794	0.452652	0.0606851			0.425906	0.0614119	0.417015	0.0583523	0.432943	0.0618854	0.42297	0.0594778	0.422622	0.0585058
				0.412244	0.0557541	0.426241	0.057392	0.440377	0.0590323	0.454652	0.0606753	0.469069	0.0623208	0.455356	0.0608879	0.458065	0.0610896	0.455356	0.0609964			0.417934	0.0612902	0.415495	0.0580301	0.425025	0.0617867	0.421408	0.0591517	0.422917	0.0583036
				0.41234	0.0557735	0.42634	0.057412	0.44048	0.059053	0.454759	0.0606965	0.46918	0.0623426	0.458065	0.0611987	0.460779	0.0614	0.458065	0.0613078			0.41017	0.0611473	0.414469	0.0577261	0.417313	0.0616692	0.420355	0.0588428	0.423778	0.058131
				0.412373	0.0557947	0.426375	0.0574338	0.440515	0.0590754	0.454796	0.0607196	0.469218	0.0623663	0.460779	0.0615096	0.463498	0.0617104	0.460779	0.0616192			0.402679	0.0609845	0.413959	0.0574462	0.409873	0.0615341	0.41983	0.0585573	0.425179	0.0579928
				ConcTikEll	ConcTikEll	ConcTikEll	ConcTikEll	ConcTikEll	ConcTikEll	ConcTikEll	ConcTikEll	ConcTikEll	ConcTikEll	0.463498	0.0618206	0.466222	0.0620209	0.463498	0.0619308			0.395525	0.060803	0.413974	0.057196	0.402767	0.0613825	0.419845	0.0583008	0.427084	0.0578926
														0.466222	0.0621317	0.468952	0.0623315	0.466222	0.0622424			0.38877	0.0606045	0.414515	0.0569801	0.396057	0.0612156	0.420399	0.0580781	0.42944	0.0578333
														0.468952	0.0624428	0.471686	0.0626421	0.468952	0.0625542			0.382471	0.0603906	0.415569	0.0568029	0.3898	0.0610349	0.421481	0.0578936	0.432183	0.0578165
														0.471686	0.0627541	0.474425	0.0629529	0.471686	0.062866			0.376682	0.0601633	0.417118	0.0566678	0.38405	0.060842	0.423071	0.0577509	0.435238	0.0578425
														0.474425	0.0630654	0.47717	0.0632638	0.474425	0.0631779			0.371452	0.0599243	0.41913	0.0565775	0.378854	0.0606385	0.425136	0.0576528	0.438522	0.0579108
														0.47717	0.0633769	0.479919	0.0635747	0.47717	0.0634899			0.366825	0.0596758	0.421567	0.0565336	0.374258	0.060426	0.427638	0.0576013	0.441945	0.0580194
														0.479919	0.0636884	0.482674	0.0638858	0.479919	0.063802			0.362842	0.0594198	0.424382	0.0565371	0.370301	0.0602065	0.430527	0.0575972	0.445414	0.0581654
														0.482674	0.064	0.483687	0.064	0.481666	0.064			0.359536	0.0591586	0.427518	0.0565878	0.367017	0.0599819	0.433747	0.0576407	0.448834	0.0583447
														0.482674	0.064	ConcBand	ConcBand	ConcBand	ConcBand			0.356935	0.0588944	0.430916	0.0566848	0.364433	0.0597539	0.437235	0.057731	0.452112	0.0585526
														IsoLine	IsoLine							0.355062	0.0586295	0.43451	0.0568262	0.362572	0.0595246	0.440924	0.0578662	0.455159	0.0587833
																						0.353933	0.058366	0.438228	0.0570093	0.36145	0.0592959	0.444742	0.0580438	0.457891	0.0590306
																						0.353556	0.0581063	0.442	0.0572304	0.361076	0.0590698	0.448614	0.0582603	0.460233	0.0592876
																						0.353937	0.0578525	0.445751	0.0574853	0.361453	0.0588483	0.452465	0.0585114	0.462123	0.0595474
																						0.35507	0.0576069	0.449408	0.057769	0.362578	0.0586331	0.456221	0.0587924	0.463508	0.059803
																						0.356947	0.0573715	0.452901	0.0580761	0.364441	0.0584261	0.459807	0.0590976	0.464351	0.0600472
																						0.359552	0.0571483	0.456161	0.0584004	0.367028	0.0582291	0.463154	0.0594213	0.464628	0.0602735
																						0.362861	0.0569392	0.459125	0.0587357	0.370314	0.0580438	0.466198	0.059757	Cyan	Cyan
																						0.366848	0.0567461	0.461735	0.0590755	0.374274	0.0578718	0.468878	0.0600983
																						0.371478	0.0565705	0.46394	0.0594132	0.378872	0.0577145	0.471143	0.0604384
																						0.376711	0.056414	0.465698	0.0597422	0.384069	0.0575732	0.472949	0.0607709
																						0.382504	0.0562779	0.466974	0.060056	0.389822	0.0574493	0.47426	0.0610891
																						0.388805	0.0561634	0.467744	0.0603487	0.39608	0.0573436	0.47505	0.061387
																						0.395563	0.0560714	0.467992	0.0606144	0.402792	0.0572572	0.475306	0.0616587
																						0.402718	0.0560027	Black	Black	0.409899	0.0571908	Black	Black
																						0.410211	0.055958			0.41734	0.0571449
																						0.417976	0.0559375			0.425053	0.0571199
																						0.425949	0.0559415			0.432972	0.0571161
																						0.43406	0.0559699			0.441028	0.0571334
																						0.442241	0.0560225			0.449153	0.0571718
																						0.450421	0.0560989			0.457279	0.0572308
																						0.458532	0.0561983			0.465335	0.0573101
																						0.466503	0.05632			0.473252	0.0574088
																						0.474268	0.0564629			0.480965	0.0575263
																						0.481758	0.0566257			0.488405	0.0576614
																						0.488912	0.0568072			0.495511	0.057813
																						0.495667	0.0570057			0.50222	0.0579799
																						0.501966	0.0572195			0.508477	0.0581606
																						0.507756	0.0574469			0.514228	0.0583535
																						0.512986	0.0576859			0.519424	0.058557
																						0.517612	0.0579344			0.524019	0.0587695
																						0.521596	0.0581904			0.527976	0.058989
																						0.524902	0.0584515			0.531261	0.0592136
																						0.527502	0.0587157			0.533844	0.0594416
																						0.529375	0.0589807			0.535705	0.0596709
																						0.530505	0.0592442			0.536828	0.0598996
																						0.530881	0.0595039			0.537202	0.0601257
																						Black	Black			Black	Black

## Sheet: PlotDat7
Source sheet	all data	0.442219	0.0588051	0	0	0.217708	0.0315113	0.530881	0.0595039	0.467992	0.0606144	0.537202	0.0601257	0.475306	0.0616587	0.644066	0.080038	0.68813	0.0844357	0.695139	0.0853065	0.705255	0.0856932	0.744625	0.0883154	0.757508	0.0923195	0.749258	0.0927748	0.803673	0.0944338	0.834495	0.0939751	0.815106	0.0950134	0.815631	0.0963295	0.828097	0.0979337	0.814759	0.0972361	0.840789	0.0982991	0.829384	0.0949517	0.851419	0.098059	0.845207	0.0992022
Plot name	Concordia0	0.440946	0.0589657	0.131529	0.0196543	0.482812	0.0640155	0.527283	0.0602596	0.466866	0.061053	0.533631	0.0607877	0.474151	0.0621114	0.641948	0.0805976	0.68573	0.0851487	0.692878	0.0858439	0.702916	0.0863006	0.741705	0.0893371	0.754883	0.0930924	0.7467	0.0935233	0.800503	0.0953509	0.829946	0.0955906	0.812157	0.0959454	0.812646	0.097259	0.825521	0.0983434	0.811699	0.0982604	0.837801	0.0992052	0.825939	0.0960853	0.848006	0.0992252	0.842334	0.0999704
Plot Type	1	0.449139	0.0595977	0.280357	0.0396948	0.805631	0.097544	0.516794	0.0608974	0.463639	0.0613226	0.523214	0.0613534	0.47084	0.0623964	0.635911	0.0807154	0.678888	0.0853921	0.686427	0.0859023	0.696244	0.0864308	0.733345	0.0898931	0.747399	0.0933545	0.739412	0.0937617	0.791451	0.0956739	0.816807	0.0967222	0.803724	0.096366	0.804117	0.0976523	0.818144	0.0981942	0.802952	0.0987601	0.829262	0.0995738	0.815953	0.0969362	0.838221	0.0998637	0.834129	0.100183
1st free col	247	0.447538	0.0600419	0.448761	0.0601292	1.19873	0.132129	0.500264	0.0613657	0.458575	0.0614012	0.506797	0.0617769	0.465641	0.0624907	0.626446	0.0803818	0.668159	0.0851463	0.67631	0.085477	0.685779	0.0860731	0.720222	0.0899383	0.73566	0.0930846	0.727983	0.0934706	0.777248	0.0953767	0.796144	0.0972783	0.79049	0.0962412	0.790736	0.0974776	0.806563	0.097498	0.789226	0.0986946	0.815863	0.0993749	0.800233	0.0974355	0.822858	0.0999228	0.821255	0.099824
Sigma Level	2	0.593587	0.0751443	0.639315	0.0809653	1.67741	0.167804	0.47903	0.0616265	0.452082	0.0612825	0.485708	0.0620238	0.458976	0.0623866	0.614319	0.0796239	0.654411	0.0844313	0.663347	0.0846025	0.67237	0.0852565	0.7034	0.0894691	0.720619	0.0923046	0.71334	0.0926736	0.759047	0.0944834	0.76963	0.0972138	0.773528	0.095581	0.773586	0.0967489	0.791716	0.0963112	0.771634	0.0980693	0.798689	0.0986248	0.780054	0.0975427	0.803162	0.0993977	0.804755	0.0989214
Absolute Errs	FALSE	0.6309	0.0793536	0.854932	0.102211	2.2603	0.204603	0.454815	0.0616588	0.444687	0.0609761	0.461657	0.0620742	0.451384	0.0620925	0.600513	0.0785031	0.638758	0.0833048	0.648586	0.0833495	0.657102	0.0840472	0.684241	0.0885235	0.703493	0.0910776	0.696668	0.0914352	0.738322	0.0930662	0.739413	0.0965339	0.754211	0.094439	0.754058	0.0955255	0.774807	0.0947301	0.751601	0.0969347	0.779133	0.0973841	0.757051	0.097249	0.780727	0.098331	0.785968	0.0975485
Symbol Type	1	0.64117	0.0799316	1.09891	0.123874	2.97009	0.242562	0.429579	0.0614599	0.436989	0.0605068	0.436592	0.0619239	0.44348	0.0616323	0.586145	0.0771102	0.622469	0.0818583	0.633225	0.0818197	0.641213	0.0825432	0.664298	0.087178	0.685671	0.0895031	0.679319	0.0898559	0.716751	0.09124	0.707941	0.0952937	0.734105	0.0929077	0.733732	0.0939063	0.757205	0.0928826	0.730749	0.0953829	0.758779	0.0957535	0.733086	0.0965784	0.757373	0.096809	0.766413	0.0958168
Inverse Plot	FALSE	0.649431	0.0804091	1.37498	0.145963	3.83441	0.281716	0.405367	0.0610459	0.429612	0.0599127	0.412543	0.0615852	0.435905	0.0610433	0.57238	0.075558	0.606863	0.0802088	0.618507	0.0801369	0.625989	0.0808663	0.645186	0.0855418	0.668595	0.0877086	0.662698	0.0880635	0.696082	0.0891528	0.677764	0.0935937	0.714838	0.091111	0.714256	0.0920225	0.740336	0.0909185	0.710768	0.0935395	0.739274	0.0938649	0.710102	0.0955852	0.73499	0.0949551	0.747677	0.0938664
Color Plot	TRUE	0.674557	0.0835884	1.68735	0.168486	4.8869	0.322105	0.384141	0.0604504	0.423153	0.0592419	0.391459	0.0610855	0.429273	0.0603731	0.560333	0.0739723	0.593204	0.0784901	0.605626	0.0784374	0.612665	0.0791524	0.628453	0.0837473	0.65365	0.0858395	0.648151	0.0862033	0.677989	0.0869736	0.651327	0.0915716	0.697971	0.0891947	0.697207	0.0900268	0.725566	0.0889969	0.693278	0.0915539	0.722201	0.0918714	0.689961	0.0943497	0.715392	0.0929194	0.731276	0.0918553
3D plot	FALSE	0.694892	0.0867878	2.04082	0.191452	6.16853	0.363766	0.367619	0.0597216	0.418135	0.0585487	0.375047	0.0604652	0.42412	0.0596761	0.55098	0.0724816	0.582599	0.0768413	0.595624	0.076859	0.602319	0.0775403	0.615455	0.0819399	0.642046	0.0840472	0.636858	0.084426	0.663939	0.084879	0.630772	0.0893912	0.684871	0.0873139	0.683967	0.0880808	0.714093	0.0872735	0.679693	0.0895869	0.708941	0.0899345	0.674294	0.0929721	0.700167	0.090867	0.718539	0.0899466
Linear	FALSE	0.688305	0.0872261	2.44077	0.214869	7.72917	0.40674	0.357142	0.0589185	0.414966	0.0578893	0.364639	0.0597747	0.420865	0.0590088	0.545079	0.0712065	0.575907	0.075396	0.589312	0.0755295	0.595789	0.0761606	0.607246	0.0802661	0.634724	0.082477	0.629732	0.0828755	0.65507	0.0830387	0.617763	0.0872292	0.676599	0.085621	0.675609	0.0863422	0.706846	0.0858878	0.671117	0.0877979	0.700569	0.0882111	0.664371	0.091564	0.690547	0.088964	0.710498	0.0882948
Data Range	AC3:AG121	0.727886	0.0880178	2.89333	0.238746	9.62957	0.451068	0.353556	0.0581063	0.413901	0.0573171	0.361076	0.0590698	0.41977	0.0584251	0.543108	0.0702505	0.573671	0.0742714	0.587201	0.0745567	0.593606	0.075125	0.60449	0.0788615	0.632275	0.081256	0.627352	0.0816774	0.6521	0.0816018	0.613355	0.0852607	0.673825	0.0842531	0.672808	0.0849518	0.704411	0.0849522	0.668242	0.0863319	0.697763	0.0868408	0.660994	0.0902395	0.687314	0.0873646	0.707805	0.0870337
Filled Symbols	FALSE	0.723925	0.0896179	3.40542	0.263093	11.9437	0.496793	0.357154	0.0573506	0.415027	0.0568784	0.364647	0.0584077	0.420925	0.0579724	0.545226	0.0696909	0.576071	0.0735585	0.589462	0.0740193	0.595945	0.0745176	0.60741	0.0778398	0.6349	0.0804831	0.629909	0.0809289	0.655269	0.0806846	0.617904	0.0836451	0.676774	0.0833211	0.675793	0.0840223	0.706987	0.0845424	0.671302	0.0853075	0.700751	0.0859347	0.664439	0.0891059	0.690728	0.0861984	0.710678	0.0862656
ConcAge	FALSE	0.744466	0.0896332	3.98486	0.287918	14.7617	0.543959	0.367643	0.0567128	0.418253	0.0566089	0.375063	0.0578421	0.424236	0.0576874	0.551262	0.0695732	0.582912	0.073315	0.595912	0.0739608	0.602617	0.0743874	0.61577	0.0772838	0.642384	0.080221	0.637198	0.0806906	0.664322	0.0803616	0.631043	0.0825135	0.685207	0.0829005	0.684322	0.083629	0.714364	0.0846916	0.680049	0.0848078	0.709291	0.0855661	0.674426	0.088255	0.700512	0.0855599	0.718884	0.0860525
ConcSwap	FALSE	0.744219	0.0906407	4.64051	0.313231	18.1931	0.592611	0.384174	0.0562445	0.423318	0.0565303	0.391481	0.0574186	0.429435	0.0575932	0.560727	0.0699067	0.593642	0.0735608	0.606029	0.0743861	0.613082	0.0747451	0.628892	0.0772386	0.654123	0.0804909	0.648627	0.0809817	0.678524	0.0806588	0.651706	0.0819574	0.698441	0.0830253	0.697703	0.0838038	0.725945	0.0853878	0.693775	0.0848733	0.72269	0.085765	0.690146	0.0877557	0.715875	0.0855008	0.731758	0.0864119
1st Symbol-row	1	0.766254	0.0914429	5.3824	0.339042	22.3716	0.642797	0.405407	0.0559837	0.429811	0.056649	0.412569	0.0571717	0.4361	0.0576973	0.572854	0.0706646	0.60739	0.0742759	0.618993	0.0752607	0.626491	0.0755617	0.645714	0.0777078	0.669164	0.0812709	0.66327	0.0817787	0.696725	0.0815522	0.67822	0.0820219	0.715403	0.0836855	0.714853	0.0845324	0.740792	0.0865746	0.711367	0.0854987	0.739863	0.0865151	0.710325	0.0876485	0.735572	0.0860259	0.748257	0.0873146
		0.741501	0.091784	6.22187	0.365359	27.4597	0.694563	0.429622	0.0559514	0.437206	0.0569554	0.436621	0.0571213	0.443692	0.0579913	0.586661	0.0717854	0.623042	0.0754023	0.633753	0.0765136	0.641759	0.076771	0.664873	0.0786534	0.68629	0.0824979	0.679942	0.083017	0.717451	0.0829694	0.708437	0.0827018	0.73472	0.0848275	0.734381	0.0857559	0.757701	0.0881557	0.7314	0.0866332	0.759419	0.0877558	0.733328	0.0879422	0.758006	0.0870926	0.767045	0.0886874
		0.769276	0.0925699	7.17175	0.392195	33.6556	0.747961	0.454858	0.0561503	0.444904	0.0574247	0.461686	0.0572716	0.451596	0.0584515	0.601029	0.0731783	0.639332	0.0768488	0.649115	0.0780435	0.657648	0.078275	0.684816	0.0799989	0.704112	0.0840724	0.697291	0.0845963	0.739022	0.0847955	0.739909	0.083942	0.754826	0.0863588	0.754707	0.0873751	0.775303	0.0900032	0.752252	0.0881851	0.779774	0.0893864	0.757292	0.0886128	0.781361	0.0886146	0.786599	0.0904192
		0.745189	0.0925956	8.24657	0.419557	IsoLine	IsoLine	0.47907	0.0565643	0.452281	0.0580188	0.485735	0.0576103	0.459171	0.0590406	0.614794	0.0747305	0.654938	0.0784983	0.663832	0.0797263	0.672872	0.0799519	0.703929	0.0816351	0.721188	0.0858669	0.713912	0.0863887	0.759691	0.0868828	0.770086	0.085642	0.774093	0.0881554	0.774183	0.0892588	0.792172	0.0919673	0.772233	0.0900285	0.799278	0.091275	0.780276	0.089606	0.803744	0.0904685	0.805336	0.0923696
		0.769367	0.0927118	9.46276	0.447457			0.500297	0.0571598	0.45874	0.0586896	0.506819	0.05811	0.465803	0.0597107	0.626841	0.0763162	0.668597	0.080217	0.676714	0.0814257	0.686197	0.0816658	0.720661	0.0834296	0.736133	0.087736	0.728458	0.0882489	0.777783	0.0890619	0.796522	0.0876641	0.79096	0.0900718	0.791232	0.0912546	0.806942	0.0938889	0.789723	0.0920141	0.816352	0.0932685	0.800418	0.0908415	0.823341	0.0925042	0.821737	0.0943806
		0.776506	0.093118	10.8389	0.475906			0.516818	0.0578886	0.463758	0.0593828	0.52323	0.0587303	0.470956	0.0604077	0.636193	0.0778069	0.679201	0.0818658	0.686716	0.0830041	0.696542	0.0832779	0.733659	0.085237	0.747737	0.0895283	0.739752	0.0900263	0.791833	0.0911565	0.817078	0.0898445	0.80406	0.0919526	0.804472	0.0932005	0.818415	0.0956123	0.803308	0.0939811	0.829612	0.0952054	0.816085	0.0922191	0.838567	0.0945566	0.834473	0.0962894
		0.761959	0.093305	12.3961	0.504914			0.527296	0.0586917	0.466927	0.0600422	0.533639	0.0594208	0.474211	0.0610751	0.642094	0.079082	0.685893	0.0833111	0.693028	0.0843336	0.703072	0.0846576	0.741869	0.0869108	0.755059	0.0910985	0.746878	0.0915768	0.800702	0.0929968	0.830087	0.0920065	0.812332	0.0936455	0.81283	0.0949391	0.825662	0.096998	0.811885	0.09577	0.837984	0.0969288	0.826008	0.0936272	0.848186	0.0964596	0.842514	0.0979412
		0.784884	0.0937543	14.158	0.534492			0.530881	0.0595039	0.467992	0.0606144	0.537202	0.0601257	0.475306	0.0616587	0.644066	0.080038	0.68813	0.0844357	0.695139	0.0853065	0.705255	0.0856932	0.744625	0.0883154	0.757508	0.0923195	0.749258	0.0927748	0.803673	0.0944338	0.834495	0.0939751	0.815106	0.0950134	0.815631	0.0963295	0.828097	0.0979337	0.814759	0.0972361	0.840789	0.0982991	0.829384	0.0949517	0.851419	0.098059	0.845207	0.0992022
		0.780182	0.0938852	16.1518	0.564651			Black	Black	Black	Black	Black	Black	Black	Black	Black	Black	Black	Black	Black	Black	Black	Black	Black	Black	Black	Black	Black	Black	Black	Black	Black	Black	Black	Black	Black	Black	Black	Black	Black	Black	Black	Black	Black	Black	Black	Black	Black	Black
		0.763789	0.0949342	18.4077	0.595403
		0.789506	0.0950592	20.9604	0.62676
		0.791403	0.0952405	23.8488	0.658732
		0.807396	0.0954873	27.1171	0.691334
		0.798659	0.096389	30.8153	0.724576
		0.774537	0.0964092	35	0.758471
		0.813246	0.0974077	35	0.758471
		0.796138	0.0978715	IsoLine	IsoLine
		0.833296	0.0979454
		0.79293	0.0980086
		0.831499	0.0981621
		0.838337	0.0982723
		0.814387	0.0982899
		0.836604	0.0985374
		0.821378	0.0987304
		0.855619	0.0995124
		0.830866	0.0995223
		0.835173	0.0997144
		0.833028	0.100115
		0.826569	0.100812
		0.830187	0.100977
		0.871098	0.101519
		0.861036	0.101939
		0.863529	0.101991
		0.852149	0.102611
		0.890402	0.102621
		0.850659	0.102978
		0.853714	0.103259
		0.89202	0.104148
		0.88937	0.104352
		0.890461	0.104927
		0.882294	0.105589
		0.890778	0.106913
		0.927643	0.107375
		0.899655	0.107795
		0.917626	0.107889
		0.897665	0.108163
		0.915876	0.10873
		0.916035	0.108767
		0.921323	0.109188
		0.916968	0.109496
		0.910534	0.109619
		0.952034	0.11021
		0.934171	0.111671
		0.936182	0.112125
		0.994184	0.112146
		0.970239	0.112404
		0.956281	0.112726
		0.969323	0.112902
		0.974604	0.11532
		1.00856	0.115681
		1.0247	0.116452
		1.06395	0.117692
		1.13589	0.124757
		1.26941	0.135263
		1.26682	0.138513
		1.26961	0.140515
		1.39118	0.145328
		1.60776	0.160943
		1.58128	0.165593
		1.63032	0.166203
		1.77209	0.178844
		1.70759	0.171975
		1.69145	0.169763
		1.74193	0.171676
		2.07654	0.190558
		2.31924	0.211867
		3.65212	0.276142
		3.70191	0.275469
		5.56474	0.357639
		5.33084	0.341783
		5.62824	0.358587
		5.67649	0.359821
		5.62716	0.353786
		5.8823	0.36278
		5.47817	0.336678
		5.34006	0.325111
		6.3117	0.378428
		6.52517	0.37116
		7.37143	0.412205
		7.14565	0.389294
		7.15408	0.38492
		7.80768	0.405584
		9.48288	0.452876
		8.75851	0.416903
		10.9255	0.466534
		10.6063	0.446395
		12.1577	0.498305
		13.7455	0.560081
		12.8882	0.521398
		12.9951	0.517329
		13.6104	0.532922
		13.6207	0.528115
		14.9863	0.561449
		24.5042	0.643131
		IsoLine	IsoLine
[truncated: 196 more columns]

## Sheet: PlotDat5
Source sheet	all data	0.442219	0.0588051	0.3	0.0421818	0.343738	0.0476374	0.530881	0.0595039	0.593587	0.0751443	0.644066	0.080038	0.68813	0.0844357	0.695139	0.0853065	0.593587	0.0751443	0.65883	0.0816446	0.620589	0.0779783	0.744625	0.0883154	0.757508	0.0923195	0.749258	0.0927748	0.803673	0.0944338	0.834495	0.0939751	0.815106	0.0950134	0.815631	0.0963295	0.828097	0.0979337	0.814759	0.0972361	0.840789	0.0982991	0.829384	0.0949517	0.851419	0.098059	0.845207	0.0992022
Plot name	Concordia0	0.440946	0.0589657	0.312171	0.0437219	0.411563	0.0557947	0.528939	0.0600672	0.6309	0.0793536	0.642908	0.0804903	0.686819	0.0850027	0.693904	0.0857463	0.6309	0.0793536	0.657226	0.0820683	IsoLine	IsoLine	0.743033	0.0891074	0.756074	0.0929344	0.747861	0.0933718	0.801943	0.0951622	0.832027	0.0952023	0.813498	0.0957444	0.814002	0.0970612	0.825521	0.0983434	0.81309	0.0980359	0.839159	0.0990138	0.827519	0.0958072	0.84956	0.0989626	0.843639	0.099818
Plot Type	1	0.449139	0.0595977	0.343738	0.0476374	0.482812	0.0640155	0.523207	0.0605753	0.64117	0.0799316	0.639596	0.080709	0.683064	0.0853228	0.690365	0.085932	0.64117	0.0799316	0.652654	0.0821607	0.700317	0.0864223	0.738449	0.0896582	0.751967	0.0932806	0.74386	0.0937002	0.796977	0.0955783	0.824834	0.0961855	0.808872	0.0962084	0.809323	0.0975123	0.818144	0.0981942	0.808292	0.0985624	0.834475	0.099447	0.822056	0.0965224	0.844195	0.099593	0.839138	0.100141
1st free col	25	0.447538	0.0600419	0.376064	0.0515675	0.557657	0.0723004	0.513935	0.061006	IsoLine	IsoLine	0.634272	0.0806844	0.67703	0.085382	0.684675	0.0858554	IsoLine	IsoLine	0.645484	0.0819142	0.694431	0.0863979	0.731072	0.0899437	0.745365	0.093343	0.737432	0.0937457	0.788991	0.0956641	0.813231	0.0968816	0.801432	0.096385	0.801799	0.097663	0.806563	0.097498	0.800575	0.0987927	0.826941	0.0995795	0.813233	0.0970659	0.835561	0.0999227	0.831899	0.100157
Sigma Level	2	0.593587	0.0751443	0.409168	0.0555124	0.636279	0.0806498	0.501529	0.0613406	0.452082	0.0612825	0.62717	0.0804177	0.668979	0.0851777	0.677084	0.0855199	0.668979	0.0851777	0.636298	0.0813489	0.686579	0.0861117	0.721226	0.0899515	0.736558	0.093119	0.728857	0.0935062	0.778334	0.0954156	0.797725	0.0972603	0.791502	0.0962665	0.791759	0.0975068	0.791716	0.0963112	0.790276	0.0987167	0.816887	0.0994057	0.801436	0.0974141	0.824033	0.0999372	0.822239	0.0998655
Absolute Errs	FALSE	0.6309	0.0793536	0.443068	0.059472	0.718871	0.0890642	0.486531	0.0615643	0.444687	0.0609761	0.6186	0.0799206	0.659264	0.0847189	0.667923	0.0849402	0.659264	0.0847189	0.625838	0.0805105	0.677104	0.0855763	0.70934	0.0896811	0.725929	0.0926182	0.718509	0.0929922	0.765473	0.0948439	0.778993	0.097305	0.779517	0.0958581	0.779641	0.0970506	0.774807	0.0947301	0.777845	0.0983377	0.804752	0.0989332	0.787181	0.0975517	0.810116	0.099636	0.81058	0.099279
Symbol Type	1	0.64117	0.0799316	0.477784	0.0634465	0.805631	0.097544	0.469596	0.0616674	0.436989	0.0605068	0.608938	0.0792146	0.64831	0.0840256	0.657593	0.0841416	0.64831	0.0840256	0.614954	0.079467	0.666419	0.0848151	0.695933	0.0891445	0.713944	0.0918626	0.706841	0.0922263	0.750969	0.0939738	0.757855	0.0970137	0.765999	0.0951777	0.765975	0.0963142	0.757205	0.0928826	0.763826	0.0976723	0.791067	0.0981826	0.771091	0.0974727	0.794418	0.0990321	0.797433	0.0984232
Inverse Plot	FALSE	0.649431	0.0804091	0.513336	0.067436	0.89677	0.10609	0.451465	0.0616455	0.429612	0.0599127	0.598604	0.0783308	0.636594	0.0831281	0.646546	0.083159	0.636594	0.0831281	0.604526	0.0783028	0.654991	0.0838613	0.681592	0.0883651	0.701126	0.0908852	0.694363	0.0912418	0.735456	0.0928434	0.735233	0.0963992	0.75154	0.0942549	0.751358	0.0953299	0.740336	0.0909185	0.748831	0.0967495	0.77643	0.0971866	0.753869	0.0971805	0.777625	0.098152	0.78337	0.0973356
Color Plot	FALSE	0.674557	0.0835884	0.549742	0.0714404	0.99251	0.114702	0.432929	0.0614994	0.423153	0.0592419	0.588051	0.0773078	0.62463	0.0820657	0.635263	0.0820354	0.62463	0.0820657	0.595399	0.0771124	0.643321	0.0827566	0.666944	0.0873769	0.688035	0.0897288	0.681621	0.0900818	0.719613	0.0915021	0.712118	0.0954883	0.736773	0.0931301	0.736429	0.0941406	0.725566	0.0889969	0.733516	0.0956097	0.761479	0.0959889	0.736267	0.096688	0.760472	0.0970341	0.769008	0.0960636
3D plot	FALSE	0.694892	0.0867878	0.587024	0.0754598	1.09308	0.123382	0.4148	0.0612355	0.418135	0.0585487	0.57774	0.0761901	0.61294	0.0808847	0.624239	0.0808198	0.61294	0.0808847	0.588313	0.0759921	0.631917	0.0815493	0.652629	0.0862231	0.675245	0.0884438	0.66917	0.088797	0.704131	0.0900085	0.689519	0.0943208	0.722341	0.0918526	0.72184	0.0927983	0.714093	0.0872735	0.718549	0.0943027	0.74687	0.0946418	0.719056	0.0960166	0.743707	0.0957273	0.754973	0.0946629
Linear	FALSE	0.688305	0.0872261	0.625203	0.0794943	1.19873	0.132129	0.397869	0.0608655	0.414966	0.0578893	0.568122	0.0750268	0.602035	0.0796368	0.613954	0.0795654	0.602035	0.0796368	0.583842	0.0750328	0.621279	0.0802922	0.639272	0.0849542	0.663313	0.0870864	0.657556	0.0874436	0.689687	0.0884279	0.668423	0.0929478	0.708876	0.090478	0.70823	0.0913618	0.706846	0.0858878	0.704586	0.0928856	0.73324	0.0932041	0.702986	0.0951956	0.728063	0.0942887	0.741879	0.0931947
Data Range	AC3:AG121	0.727886	0.0880178	0.664301	0.0835439	1.30971	0.140944	0.382876	0.0604053	0.413901	0.0573171	0.559616	0.0738686	0.592391	0.0783765	0.604859	0.0783269	0.592391	0.0783765	0.582348	0.074312	0.611871	0.0790402	0.627457	0.0836255	0.652761	0.085716	0.647286	0.0860806	0.676912	0.0868294	0.649753	0.0914292	0.696967	0.0890665	0.696192	0.0898937	0.704411	0.0849522	0.692236	0.0914203	0.721184	0.0917387	0.688761	0.0942611	0.714225	0.0927813	0.730299	0.0917231
Filled Symbols	FALSE	0.723925	0.0896179	0.704339	0.0876087	1.42629	0.149828	0.370477	0.0598753	0.415027	0.0568784	0.552595	0.0727661	0.58443	0.0771589	0.597351	0.0771586	0.58443	0.0771589	0.583952	0.0738883	0.604105	0.0778481	0.617701	0.0822953	0.64405	0.0843924	0.638808	0.0847677	0.666366	0.0852828	0.634325	0.0898315	0.687134	0.0876797	0.686254	0.0884583	0.706987	0.0845424	0.68204	0.089971	0.711231	0.0903096	0.677002	0.0932537	0.702797	0.0912707	0.720738	0.0903125
ConcAge	FALSE	0.744466	0.0896332	0.74534	0.0916888	1.54876	0.158781	0.361213	0.0592985	0.418253	0.0566089	0.547366	0.0717676	0.578501	0.0760372	0.591758	0.0761116	0.578501	0.0760372	0.588524	0.0737959	0.59832	0.0767678	0.610429	0.0810216	0.637562	0.0831735	0.632494	0.0835623	0.658508	0.0838557	0.622812	0.0882245	0.679806	0.0863784	0.678849	0.0871182	0.714364	0.0846916	0.674441	0.0886009	0.703814	0.0889793	0.668224	0.0922176	0.694278	0.0898232	0.713615	0.0890245
ConcSwap	FALSE	0.744219	0.0906407	0.787328	0.0957842	1.67741	0.167804	0.355489	0.0587001	0.423318	0.0565303	0.544157	0.0709167	0.574861	0.0750605	0.588324	0.0752314	0.574861	0.0750605	0.595694	0.0740424	0.594768	0.0758467	0.60596	0.07986	0.633579	0.0821126	0.628618	0.082517	0.653682	0.0826106	0.615719	0.0866783	0.675304	0.0852193	0.674301	0.0859321	0.725945	0.0853878	0.669774	0.0873699	0.699259	0.087806	0.662809	0.091198	0.68904	0.0885019	0.70924	0.0879154
1st Symbol-row	1	0.766254	0.0914429	0.830326	0.0998949	IsoLine	IsoLine	0.353556	0.0581063	0.429811	0.056649	0.543108	0.0702505	0.573671	0.0742714	0.587201	0.0745567	0.573671	0.0742714	0.60488	0.0746077	0.593606	0.075125	0.60449	0.0788615	0.632275	0.081256	0.627352	0.0816774	0.6521	0.0816018	0.613355	0.0852607	0.673825	0.0842531	0.672808	0.0849518	0.740792	0.0865746	0.668242	0.0863319	0.697763	0.0868408	0.660994	0.0902395	0.687314	0.0873646	0.707805	0.0870337
		0.741501	0.091784	0.874358	0.104021			0.355499	0.057543	0.437206	0.0569554	0.544265	0.0697982	0.574982	0.0737044	0.588435	0.0741169	0.574982	0.0737044	0.615339	0.0754461	0.594883	0.0746343	0.606081	0.0780695	0.633709	0.0806411	0.628749	0.0810804	0.653829	0.0808734	0.615823	0.0840334	0.675434	0.0835221	0.674437	0.0842201	0.757701	0.0881557	0.669911	0.0855321	0.699394	0.0861261	0.66286	0.089384	0.689173	0.086461	0.709373	0.0864179
		0.769276	0.0925699	0.91945	0.108163			0.361231	0.0570349	0.444904	0.0574247	0.547578	0.0695795	0.578736	0.0733843	0.591975	0.0739312	0.578736	0.0733843	0.626224	0.0764896	0.598544	0.0743959	0.610665	0.0775187	0.637816	0.0802949	0.632749	0.080752	0.658796	0.0804572	0.623016	0.0830502	0.680059	0.0830581	0.679116	0.0837691	0.775303	0.0900032	0.674709	0.0850055	0.704078	0.0856929	0.668323	0.0886688	0.694538	0.0858305	0.713874	0.0860949
		0.745189	0.0925956	0.965626	0.11232			0.370502	0.0566042	0.452281	0.0580188	0.552902	0.0696041	0.584771	0.0733251	0.597665	0.0740077	0.584771	0.0733251	0.636652	0.0776537	0.60443	0.0744203	0.618042	0.0772331	0.644418	0.0802325	0.639178	0.0807066	0.666782	0.0803715	0.634619	0.0823541	0.687499	0.0828815	0.686639	0.0836183	0.792172	0.0919673	0.682426	0.0847752	0.711611	0.0855604	0.677146	0.0881253	0.703173	0.0855009	0.721113	0.0860789
		0.769367	0.0927118	1.01291	0.116493			0.382908	0.0562696	0.45874	0.0586896	0.560004	0.0698708	0.592822	0.0735294	0.605256	0.0743432	0.592822	0.0735294	0.645779	0.0788442	0.612282	0.0747065	0.627889	0.0772254	0.653225	0.0804565	0.647753	0.0809461	0.677438	0.0806199	0.650125	0.0819754	0.697429	0.083	0.69668	0.0837745	0.806942	0.0938889	0.692725	0.0848512	0.721665	0.0857341	0.688943	0.0877771	0.7147	0.0854864	0.730773	0.0863705
		0.776506	0.093118	1.06134	0.120681			0.397907	0.0560459	0.463758	0.0593828	0.568573	0.070368	0.602536	0.0739882	0.614416	0.0749229	0.602536	0.0739882	0.652865	0.0799645	0.621757	0.0752419	0.639775	0.0774957	0.663854	0.0809573	0.658101	0.08146	0.690299	0.0811917	0.668857	0.0819307	0.709415	0.0834084	0.708798	0.0842307	0.818415	0.0956123	0.705156	0.0852302	0.7338	0.0862067	0.703198	0.0876395	0.728617	0.0857876	0.742432	0.086957
		0.761959	0.093305	1.11093	0.124885			0.414841	0.0559428	0.466927	0.0600422	0.578236	0.0710739	0.613491	0.0746815	0.624746	0.0757215	0.613491	0.0746815	0.657336	0.0809238	0.632442	0.0760031	0.653181	0.0780324	0.675839	0.0817129	0.669768	0.082226	0.704803	0.0820618	0.689995	0.082222	0.722932	0.0840888	0.722464	0.0849671	0.825662	0.096998	0.719175	0.0858957	0.747485	0.0869573	0.719288	0.0877185	0.744315	0.0863915	0.75558	0.0878128
		0.784884	0.0937543	1.16171	0.129105			0.432973	0.0559647	0.467992	0.0606144	0.58857	0.0719577	0.625206	0.075579	0.635794	0.0767041	0.625206	0.075579	0.65883	0.0816446	0.64387	0.0769569	0.667522	0.0788118	0.688657	0.0826903	0.682246	0.0832104	0.720316	0.0831922	0.712617	0.0828365	0.737391	0.0850116	0.737081	0.0859515	0.828097	0.0979337	0.73417	0.0868185	0.762123	0.0879533	0.73651	0.0880107	0.761108	0.0872716	0.769642	0.0889004
		0.780182	0.0938852	1.21371	0.133341			0.451508	0.0561108	Black	Black	0.599123	0.0729808	0.63717	0.0766415	0.647077	0.0778278	0.63717	0.0766415	0.647077	0.0778278	0.65554	0.0780616	0.68217	0.0798	0.701748	0.0838467	0.694989	0.0843704	0.73616	0.0845335	0.735732	0.0837474	0.752159	0.0861363	0.75201	0.0871408	Black	Black	0.749485	0.0879583	0.777073	0.089151	0.754112	0.0885032	0.778262	0.0883895	0.784005	0.0901724
		0.763789	0.0949342	1.26697	0.137593			0.469638	0.0563746			0.609434	0.0740984	0.648861	0.0778225	0.658101	0.0790434	0.648861	0.0778225	0.658101	0.0790434	0.666944	0.0792689	0.696486	0.0809538	0.714538	0.0851317	0.70744	0.0856552	0.751642	0.0860271	0.758331	0.0849149	0.76659	0.0874139	0.766599	0.088483			0.764452	0.0892653	0.791683	0.0904981	0.771323	0.0891746	0.795027	0.0896963	0.798039	0.0915731
		0.789506	0.0950592	1.32151	0.14186			0.486569	0.0567447			0.619052	0.0752617	0.659766	0.0790704	0.668386	0.0802978	0.659766	0.0790704	0.668386	0.0802978	0.677582	0.080526	0.709843	0.0822227	0.72647	0.0864891	0.719054	0.0870087	0.766086	0.0876076	0.779427	0.0862879	0.780055	0.0887885	0.780209	0.0899196			0.778415	0.0906824	0.805313	0.0919358	0.787393	0.0899956	0.81067	0.0911348	0.811133	0.0930413
		0.791403	0.0952405	1.37736	0.146144			0.501562	0.0572048			0.627558	0.0764199	0.66941	0.0803307	0.677481	0.0815362	0.66941	0.0803307	0.677481	0.0815362	0.68699	0.081778	0.721658	0.0835513	0.737022	0.0878595	0.729324	0.0883716	0.77886	0.0892062	0.798097	0.0878065	0.791964	0.0902	0.792247	0.0913876			0.790765	0.0921476	0.817368	0.0934012	0.801617	0.0909301	0.824508	0.0926423	0.822713	0.0945128
		0.807396	0.0954873	1.43455	0.150443			0.513961	0.0577349			0.634578	0.0775224	0.67737	0.0815482	0.684989	0.0827045	0.67737	0.0815482	0.684989	0.0827045	0.694756	0.0829701	0.731414	0.0848816	0.745733	0.0891831	0.737802	0.0896845	0.789407	0.0907527	0.813525	0.0894042	0.801798	0.0915867	0.802185	0.0928231			0.800962	0.0935969	0.827322	0.0948303	0.813376	0.0919375	0.835937	0.0941529	0.832274	0.0959234
		0.798659	0.096389	1.49312	0.154759			0.523225	0.0583117			0.639808	0.0785209	0.6833	0.0826699	0.690582	0.0837516	0.6833	0.0826699	0.690582	0.0837516	0.700541	0.0840504	0.738685	0.0861553	0.752221	0.090402	0.744116	0.09089	0.797264	0.0921798	0.825038	0.0910112	0.809125	0.0928881	0.80959	0.0941631			0.80856	0.094967	0.834738	0.0961605	0.822155	0.0929736	0.844456	0.0956004	0.839397	0.0972114
		0.774537	0.0964092	1.55309	0.159091			0.528948	0.0589101			0.643017	0.0793718	0.686939	0.0836466	0.694015	0.0846317	0.686939	0.0836466	0.694015	0.0846317	0.704093	0.0849715	0.743154	0.0873168	0.756204	0.0914629	0.747991	0.0919353	0.80209	0.0934249	0.832131	0.0925574	0.813627	0.0940472	0.814138	0.0953492			0.813227	0.096198	0.839294	0.0973339	0.82757	0.0939932	0.849693	0.0969217	0.843772	0.0983205
		0.813246	0.0974077	1.61451	0.163439			0.530881	0.0595039			0.644066	0.080038	0.68813	0.0844357	0.695139	0.0853065	0.68813	0.0844357	0.695139	0.0853065	0.705255	0.0856932	0.744625	0.0883154	0.757508	0.0923195	0.749258	0.0927748	0.803673	0.0944338	0.834495	0.0939751	0.815106	0.0950134	0.815631	0.0963295			0.814759	0.0972361	0.840789	0.0982991	0.829384	0.0949517	0.851419	0.098059	0.845207	0.0992022
		0.796138	0.0978715	1.67741	0.167804			Black	Black			Black	Black	Black	Black	Black	Black	Black	Black	Black	Black	Black	Black	Black	Black	Black	Black	Black	Black	Black	Black	Black	Black	Black	Black	Black	Black			Black	Black	Black	Black	Black	Black	Black	Black	Black	Black
		0.833296	0.0979454	1.7	0.16934
		0.79293	0.0980086	IsoLine	IsoLine
		0.831499	0.0981621
		0.838337	0.0982723
		0.814387	0.0982899
		0.836604	0.0985374
		0.821378	0.0987304
		0.855619	0.0995124
		0.830866	0.0995223
		0.835173	0.0997144
		0.833028	0.100115
		0.826569	0.100812
		0.830187	0.100977
		0.871098	0.101519
		0.861036	0.101939
		0.863529	0.101991
		0.852149	0.102611
		0.890402	0.102621
		0.850659	0.102978
		0.853714	0.103259
		0.89202	0.104148
		0.88937	0.104352
		0.890461	0.104927
		0.882294	0.105589
		0.890778	0.106913
		0.927643	0.107375
		0.899655	0.107795
		0.917626	0.107889
		0.897665	0.108163
		0.915876	0.10873
		0.916035	0.108767
		0.921323	0.109188
		0.916968	0.109496
		0.910534	0.109619
		0.952034	0.11021
		0.934171	0.111671
		0.936182	0.112125
		0.994184	0.112146
		0.970239	0.112404
		0.956281	0.112726
		0.969323	0.112902
		0.974604	0.11532
		1.00856	0.115681
		1.0247	0.116452
		1.06395	0.117692
		1.13589	0.124757
		1.26941	0.135263
		1.26682	0.138513
		1.26961	0.140515
		1.39118	0.145328
		1.60776	0.160943
		1.58128	0.165593
		1.63032	0.166203
		1.77209	0.178844
		1.70759	0.171975
		1.69145	0.169763
		1.74193	0.171676
		2.07654	0.190558
		2.31924	0.211867
		3.65212	0.276142
		3.70191	0.275469
		5.56474	0.357639
		5.33084	0.341783
		5.62824	0.358587
		5.67649	0.359821
		5.62716	0.353786
		5.8823	0.36278
		5.47817	0.336678
		5.34006	0.325111
		6.3117	0.378428
		6.52517	0.37116
		7.37143	0.412205
		7.14565	0.389294
		7.15408	0.38492
		7.80768	0.405584
		9.48288	0.452876
		8.75851	0.416903
		10.9255	0.466534
		10.6063	0.446395
		12.1577	0.498305
		13.7455	0.560081
		12.8882	0.521398
		12.9951	0.517329
		13.6104	0.532922
		13.6207	0.528115
		14.9863	0.561449
		24.5042	0.643131
		IsoLine	IsoLine
				0.442219	0.0588051	0.464628	0.0602735	0.443625	0.0593897
				0.440946	0.0589657	0.463762	0.0606045	IsoLine	IsoLine
				0.449139	0.0595977	0.461265	0.060837
				0.447538	0.0600419	0.457338	0.0609522
				IsoLine	IsoLine	0.4523	0.0609409
						0.44656	0.0608039
						0.440582	0.0605523
						0.43485	0.0602066
						0.429829	0.0597946
						0.425926	0.0593499
						0.423457	0.0589083
						0.422622	0.0585058
						0.423488	0.0581748
						0.425986	0.0579423
						0.429912	0.0578271
						0.43495	0.0578384
						0.44069	0.0579754
						0.446668	0.058227
						0.4524	0.0585727
						0.457421	0.0589847
						0.461324	0.0594295
						0.463793	0.059871
						0.464628	0.0602735
[truncated: 206 more columns]

## Sheet: PlotDat6
Source sheet	all data	0.442219	0.0588051	0	0	0.217708	0.0315113	0.530881	0.0595039	0.467992	0.0606144	0.537202	0.0601257	0.475306	0.0616587	0.644066	0.080038	0.68813	0.0844357	0.695139	0.0853065	0.705255	0.0856932	0.744625	0.0883154	0.757508	0.0923195	0.749258	0.0927748	0.803673	0.0944338	0.834495	0.0939751	0.815106	0.0950134	0.815631	0.0963295	0.828097	0.0979337	0.814759	0.0972361	0.840789	0.0982991	0.829384	0.0949517	0.851419	0.098059	0.845207	0.0992022
Plot name	Concordia1	0.440946	0.0589657	0.131529	0.0196543	0.482812	0.0640155	0.527283	0.0602596	0.466866	0.061053	0.533631	0.0607877	0.474151	0.0621114	0.641948	0.0805976	0.68573	0.0851487	0.692878	0.0858439	0.702916	0.0863006	0.741705	0.0893371	0.754883	0.0930924	0.7467	0.0935233	0.800503	0.0953509	0.829946	0.0955906	0.812157	0.0959454	0.812646	0.097259	0.825521	0.0983434	0.811699	0.0982604	0.837801	0.0992052	0.825939	0.0960853	0.848006	0.0992252	0.842334	0.0999704
Plot Type	1	0.449139	0.0595977	0.280357	0.0396948	0.805631	0.097544	0.516794	0.0608974	0.463639	0.0613226	0.523214	0.0613534	0.47084	0.0623964	0.635911	0.0807154	0.678888	0.0853921	0.686427	0.0859023	0.696244	0.0864308	0.733345	0.0898931	0.747399	0.0933545	0.739412	0.0937617	0.791451	0.0956739	0.816807	0.0967222	0.803724	0.096366	0.804117	0.0976523	0.818144	0.0981942	0.802952	0.0987601	0.829262	0.0995738	0.815953	0.0969362	0.838221	0.0998637	0.834129	0.100183
1st free col	247	0.447538	0.0600419	0.448761	0.0601292	1.19873	0.132129	0.500264	0.0613657	0.458575	0.0614012	0.506797	0.0617769	0.465641	0.0624907	0.626446	0.0803818	0.668159	0.0851463	0.67631	0.085477	0.685779	0.0860731	0.720222	0.0899383	0.73566	0.0930846	0.727983	0.0934706	0.777248	0.0953767	0.796144	0.0972783	0.79049	0.0962412	0.790736	0.0974776	0.806563	0.097498	0.789226	0.0986946	0.815863	0.0993749	0.800233	0.0974355	0.822858	0.0999228	0.821255	0.099824
Sigma Level	2	0.593587	0.0751443	0.639315	0.0809653	1.67741	0.167804	0.47903	0.0616265	0.452082	0.0612825	0.485708	0.0620238	0.458976	0.0623866	0.614319	0.0796239	0.654411	0.0844313	0.663347	0.0846025	0.67237	0.0852565	0.7034	0.0894691	0.720619	0.0923046	0.71334	0.0926736	0.759047	0.0944834	0.76963	0.0972138	0.773528	0.095581	0.773586	0.0967489	0.791716	0.0963112	0.771634	0.0980693	0.798689	0.0986248	0.780054	0.0975427	0.803162	0.0993977	0.804755	0.0989214
Absolute Errs	FALSE	0.6309	0.0793536	0.854932	0.102211	2.2603	0.204603	0.454815	0.0616588	0.444687	0.0609761	0.461657	0.0620742	0.451384	0.0620925	0.600513	0.0785031	0.638758	0.0833048	0.648586	0.0833495	0.657102	0.0840472	0.684241	0.0885235	0.703493	0.0910776	0.696668	0.0914352	0.738322	0.0930662	0.739413	0.0965339	0.754211	0.094439	0.754058	0.0955255	0.774807	0.0947301	0.751601	0.0969347	0.779133	0.0973841	0.757051	0.097249	0.780727	0.098331	0.785968	0.0975485
Symbol Type	1	0.64117	0.0799316	1.09891	0.123874	2.97009	0.242562	0.429579	0.0614599	0.436989	0.0605068	0.436592	0.0619239	0.44348	0.0616323	0.586145	0.0771102	0.622469	0.0818583	0.633225	0.0818197	0.641213	0.0825432	0.664298	0.087178	0.685671	0.0895031	0.679319	0.0898559	0.716751	0.09124	0.707941	0.0952937	0.734105	0.0929077	0.733732	0.0939063	0.757205	0.0928826	0.730749	0.0953829	0.758779	0.0957535	0.733086	0.0965784	0.757373	0.096809	0.766413	0.0958168
Inverse Plot	FALSE	0.649431	0.0804091	1.37498	0.145963	3.83441	0.281716	0.405367	0.0610459	0.429612	0.0599127	0.412543	0.0615852	0.435905	0.0610433	0.57238	0.075558	0.606863	0.0802088	0.618507	0.0801369	0.625989	0.0808663	0.645186	0.0855418	0.668595	0.0877086	0.662698	0.0880635	0.696082	0.0891528	0.677764	0.0935937	0.714838	0.091111	0.714256	0.0920225	0.740336	0.0909185	0.710768	0.0935395	0.739274	0.0938649	0.710102	0.0955852	0.73499	0.0949551	0.747677	0.0938664
Color Plot	FALSE	0.674557	0.0835884	1.68735	0.168486	4.8869	0.322105	0.384141	0.0604504	0.423153	0.0592419	0.391459	0.0610855	0.429273	0.0603731	0.560333	0.0739723	0.593204	0.0784901	0.605626	0.0784374	0.612665	0.0791524	0.628453	0.0837473	0.65365	0.0858395	0.648151	0.0862033	0.677989	0.0869736	0.651327	0.0915716	0.697971	0.0891947	0.697207	0.0900268	0.725566	0.0889969	0.693278	0.0915539	0.722201	0.0918714	0.689961	0.0943497	0.715392	0.0929194	0.731276	0.0918553
3D plot	FALSE	0.694892	0.0867878	2.04082	0.191452	6.16853	0.363766	0.367619	0.0597216	0.418135	0.0585487	0.375047	0.0604652	0.42412	0.0596761	0.55098	0.0724816	0.582599	0.0768413	0.595624	0.076859	0.602319	0.0775403	0.615455	0.0819399	0.642046	0.0840472	0.636858	0.084426	0.663939	0.084879	0.630772	0.0893912	0.684871	0.0873139	0.683967	0.0880808	0.714093	0.0872735	0.679693	0.0895869	0.708941	0.0899345	0.674294	0.0929721	0.700167	0.090867	0.718539	0.0899466
Linear	FALSE	0.688305	0.0872261	2.44077	0.214869	7.72917	0.40674	0.357142	0.0589185	0.414966	0.0578893	0.364639	0.0597747	0.420865	0.0590088	0.545079	0.0712065	0.575907	0.075396	0.589312	0.0755295	0.595789	0.0761606	0.607246	0.0802661	0.634724	0.082477	0.629732	0.0828755	0.65507	0.0830387	0.617763	0.0872292	0.676599	0.085621	0.675609	0.0863422	0.706846	0.0858878	0.671117	0.0877979	0.700569	0.0882111	0.664371	0.091564	0.690547	0.088964	0.710498	0.0882948
Data Range	AC3:AG121	0.727886	0.0880178	2.89333	0.238746	9.62957	0.451068	0.353556	0.0581063	0.413901	0.0573171	0.361076	0.0590698	0.41977	0.0584251	0.543108	0.0702505	0.573671	0.0742714	0.587201	0.0745567	0.593606	0.075125	0.60449	0.0788615	0.632275	0.081256	0.627352	0.0816774	0.6521	0.0816018	0.613355	0.0852607	0.673825	0.0842531	0.672808	0.0849518	0.704411	0.0849522	0.668242	0.0863319	0.697763	0.0868408	0.660994	0.0902395	0.687314	0.0873646	0.707805	0.0870337
Filled Symbols	FALSE	0.723925	0.0896179	3.40542	0.263093	11.9437	0.496793	0.357154	0.0573506	0.415027	0.0568784	0.364647	0.0584077	0.420925	0.0579724	0.545226	0.0696909	0.576071	0.0735585	0.589462	0.0740193	0.595945	0.0745176	0.60741	0.0778398	0.6349	0.0804831	0.629909	0.0809289	0.655269	0.0806846	0.617904	0.0836451	0.676774	0.0833211	0.675793	0.0840223	0.706987	0.0845424	0.671302	0.0853075	0.700751	0.0859347	0.664439	0.0891059	0.690728	0.0861984	0.710678	0.0862656
ConcAge	FALSE	0.744466	0.0896332	3.98486	0.287918	14.7617	0.543959	0.367643	0.0567128	0.418253	0.0566089	0.375063	0.0578421	0.424236	0.0576874	0.551262	0.0695732	0.582912	0.073315	0.595912	0.0739608	0.602617	0.0743874	0.61577	0.0772838	0.642384	0.080221	0.637198	0.0806906	0.664322	0.0803616	0.631043	0.0825135	0.685207	0.0829005	0.684322	0.083629	0.714364	0.0846916	0.680049	0.0848078	0.709291	0.0855661	0.674426	0.088255	0.700512	0.0855599	0.718884	0.0860525
ConcSwap	FALSE	0.744219	0.0906407	4.64051	0.313231	18.1931	0.592611	0.384174	0.0562445	0.423318	0.0565303	0.391481	0.0574186	0.429435	0.0575932	0.560727	0.0699067	0.593642	0.0735608	0.606029	0.0743861	0.613082	0.0747451	0.628892	0.0772386	0.654123	0.0804909	0.648627	0.0809817	0.678524	0.0806588	0.651706	0.0819574	0.698441	0.0830253	0.697703	0.0838038	0.725945	0.0853878	0.693775	0.0848733	0.72269	0.085765	0.690146	0.0877557	0.715875	0.0855008	0.731758	0.0864119
1st Symbol-row	1	0.766254	0.0914429	5.3824	0.339042	22.3716	0.642797	0.405407	0.0559837	0.429811	0.056649	0.412569	0.0571717	0.4361	0.0576973	0.572854	0.0706646	0.60739	0.0742759	0.618993	0.0752607	0.626491	0.0755617	0.645714	0.0777078	0.669164	0.0812709	0.66327	0.0817787	0.696725	0.0815522	0.67822	0.0820219	0.715403	0.0836855	0.714853	0.0845324	0.740792	0.0865746	0.711367	0.0854987	0.739863	0.0865151	0.710325	0.0876485	0.735572	0.0860259	0.748257	0.0873146
		0.741501	0.091784	6.22187	0.365359	27.4597	0.694563	0.429622	0.0559514	0.437206	0.0569554	0.436621	0.0571213	0.443692	0.0579913	0.586661	0.0717854	0.623042	0.0754023	0.633753	0.0765136	0.641759	0.076771	0.664873	0.0786534	0.68629	0.0824979	0.679942	0.083017	0.717451	0.0829694	0.708437	0.0827018	0.73472	0.0848275	0.734381	0.0857559	0.757701	0.0881557	0.7314	0.0866332	0.759419	0.0877558	0.733328	0.0879422	0.758006	0.0870926	0.767045	0.0886874
		0.769276	0.0925699	7.17175	0.392195	33.6556	0.747961	0.454858	0.0561503	0.444904	0.0574247	0.461686	0.0572716	0.451596	0.0584515	0.601029	0.0731783	0.639332	0.0768488	0.649115	0.0780435	0.657648	0.078275	0.684816	0.0799989	0.704112	0.0840724	0.697291	0.0845963	0.739022	0.0847955	0.739909	0.083942	0.754826	0.0863588	0.754707	0.0873751	0.775303	0.0900032	0.752252	0.0881851	0.779774	0.0893864	0.757292	0.0886128	0.781361	0.0886146	0.786599	0.0904192
		0.745189	0.0925956	8.24657	0.419557	IsoLine	IsoLine	0.47907	0.0565643	0.452281	0.0580188	0.485735	0.0576103	0.459171	0.0590406	0.614794	0.0747305	0.654938	0.0784983	0.663832	0.0797263	0.672872	0.0799519	0.703929	0.0816351	0.721188	0.0858669	0.713912	0.0863887	0.759691	0.0868828	0.770086	0.085642	0.774093	0.0881554	0.774183	0.0892588	0.792172	0.0919673	0.772233	0.0900285	0.799278	0.091275	0.780276	0.089606	0.803744	0.0904685	0.805336	0.0923696
		0.769367	0.0927118	9.46276	0.447457			0.500297	0.0571598	0.45874	0.0586896	0.506819	0.05811	0.465803	0.0597107	0.626841	0.0763162	0.668597	0.080217	0.676714	0.0814257	0.686197	0.0816658	0.720661	0.0834296	0.736133	0.087736	0.728458	0.0882489	0.777783	0.0890619	0.796522	0.0876641	0.79096	0.0900718	0.791232	0.0912546	0.806942	0.0938889	0.789723	0.0920141	0.816352	0.0932685	0.800418	0.0908415	0.823341	0.0925042	0.821737	0.0943806
		0.776506	0.093118	10.8389	0.475906			0.516818	0.0578886	0.463758	0.0593828	0.52323	0.0587303	0.470956	0.0604077	0.636193	0.0778069	0.679201	0.0818658	0.686716	0.0830041	0.696542	0.0832779	0.733659	0.085237	0.747737	0.0895283	0.739752	0.0900263	0.791833	0.0911565	0.817078	0.0898445	0.80406	0.0919526	0.804472	0.0932005	0.818415	0.0956123	0.803308	0.0939811	0.829612	0.0952054	0.816085	0.0922191	0.838567	0.0945566	0.834473	0.0962894
		0.761959	0.093305	12.3961	0.504914			0.527296	0.0586917	0.466927	0.0600422	0.533639	0.0594208	0.474211	0.0610751	0.642094	0.079082	0.685893	0.0833111	0.693028	0.0843336	0.703072	0.0846576	0.741869	0.0869108	0.755059	0.0910985	0.746878	0.0915768	0.800702	0.0929968	0.830087	0.0920065	0.812332	0.0936455	0.81283	0.0949391	0.825662	0.096998	0.811885	0.09577	0.837984	0.0969288	0.826008	0.0936272	0.848186	0.0964596	0.842514	0.0979412
		0.784884	0.0937543	14.158	0.534492			0.530881	0.0595039	0.467992	0.0606144	0.537202	0.0601257	0.475306	0.0616587	0.644066	0.080038	0.68813	0.0844357	0.695139	0.0853065	0.705255	0.0856932	0.744625	0.0883154	0.757508	0.0923195	0.749258	0.0927748	0.803673	0.0944338	0.834495	0.0939751	0.815106	0.0950134	0.815631	0.0963295	0.828097	0.0979337	0.814759	0.0972361	0.840789	0.0982991	0.829384	0.0949517	0.851419	0.098059	0.845207	0.0992022
		0.780182	0.0938852	16.1518	0.564651			Black	Black	Black	Black	Black	Black	Black	Black	Black	Black	Black	Black	Black	Black	Black	Black	Black	Black	Black	Black	Black	Black	Black	Black	Black	Black	Black	Black	Black	Black	Black	Black	Black	Black	Black	Black	Black	Black	Black	Black	Black	Black
		0.763789	0.0949342	18.4077	0.595403
		0.789506	0.0950592	20.9604	0.62676
		0.791403	0.0952405	23.8488	0.658732
		0.807396	0.0954873	27.1171	0.691334
		0.798659	0.096389	30.8153	0.724576
		0.774537	0.0964092	35	0.758471
		0.813246	0.0974077	35	0.758471
		0.796138	0.0978715	IsoLine	IsoLine
		0.833296	0.0979454
		0.79293	0.0980086
		0.831499	0.0981621
		0.838337	0.0982723
		0.814387	0.0982899
		0.836604	0.0985374
		0.821378	0.0987304
		0.855619	0.0995124
		0.830866	0.0995223
		0.835173	0.0997144
		0.833028	0.100115
		0.826569	0.100812
		0.830187	0.100977
		0.871098	0.101519
		0.861036	0.101939
		0.863529	0.101991
		0.852149	0.102611
		0.890402	0.102621
		0.850659	0.102978
		0.853714	0.103259
		0.89202	0.104148
		0.88937	0.104352
		0.890461	0.104927
		0.882294	0.105589
		0.890778	0.106913
		0.927643	0.107375
		0.899655	0.107795
		0.917626	0.107889
		0.897665	0.108163
		0.915876	0.10873
		0.916035	0.108767
		0.921323	0.109188
		0.916968	0.109496
		0.910534	0.109619
		0.952034	0.11021
		0.934171	0.111671
		0.936182	0.112125
		0.994184	0.112146
		0.970239	0.112404
		0.956281	0.112726
		0.969323	0.112902
		0.974604	0.11532
		1.00856	0.115681
		1.0247	0.116452
		1.06395	0.117692
		1.13589	0.124757
		1.26941	0.135263
		1.26682	0.138513
		1.26961	0.140515
		1.39118	0.145328
		1.60776	0.160943
		1.58128	0.165593
		1.63032	0.166203
		1.77209	0.178844
		1.70759	0.171975
		1.69145	0.169763
		1.74193	0.171676
		2.07654	0.190558
		2.31924	0.211867
		3.65212	0.276142
		3.70191	0.275469
		5.56474	0.357639
		5.33084	0.341783
		5.62824	0.358587
		5.67649	0.359821
		5.62716	0.353786
		5.8823	0.36278
		5.47817	0.336678
		5.34006	0.325111
		6.3117	0.378428
		6.52517	0.37116
		7.37143	0.412205
		7.14565	0.389294
		7.15408	0.38492
		7.80768	0.405584
		9.48288	0.452876
		8.75851	0.416903
		10.9255	0.466534
		10.6063	0.446395
		12.1577	0.498305
		13.7455	0.560081
		12.8882	0.521398
		12.9951	0.517329
		13.6104	0.532922
		13.6207	0.528115
		14.9863	0.561449
		24.5042	0.643131
		IsoLine	IsoLine
[truncated: 196 more columns]

## Sheet: PlotDat8
Source sheet	all data	0.442219	0.0588051	0.3	0.042188	0.343738	0.0476374	0.530881	0.0595039	0.593587	0.0751443	0.644066	0.080038	0.68813	0.0844357	0.695139	0.0853065	0.593587	0.0751443	0.65883	0.0816446	0.620589	0.0779783	0.744625	0.0883154	0.757508	0.0923195	0.749258	0.0927748	0.803673	0.0944338	0.834495	0.0939751	0.815106	0.0950134	0.815631	0.0963295	0.828097	0.0979337	0.814759	0.0972361	0.840789	0.0982991	0.829384	0.0949517	0.851419	0.098059	0.845207	0.0992022
Plot name	Concordia2	0.440946	0.0589657	0.307722	0.0431638	0.411563	0.0557947	0.528939	0.0600672	0.6309	0.0793536	0.642908	0.0804903	0.686819	0.0850027	0.693904	0.0857463	0.6309	0.0793536	0.657954	0.0819867	IsoLine	IsoLine	0.743622	0.0889597	0.756074	0.0929344	0.747861	0.0933718	0.802581	0.0950339	0.832946	0.0949626	0.814091	0.0956118	0.814603	0.0969296	0.826693	0.0982883	0.813706	0.0978892	0.839761	0.0988859	0.828216	0.0956376	0.850248	0.0987939	0.843639	0.099818
Plot Type	1	0.449139	0.0595977	0.325608	0.0453982	0.482812	0.0640155	0.523207	0.0605753	0.64117	0.0799316	0.639596	0.080709	0.683064	0.0853228	0.690365	0.085932	0.64117	0.0799316	0.655445	0.0821537	0.700317	0.0864223	0.740734	0.0894575	0.751967	0.0932806	0.74386	0.0937002	0.799452	0.0954427	0.828423	0.0958043	0.811177	0.0960472	0.811655	0.0973581	0.822648	0.0983437	0.810683	0.0983758	0.836809	0.0993004	0.824783	0.0962405	0.84687	0.099363	0.839138	0.100141
1st free col	25	0.447538	0.0600419	0.343738	0.0476374	0.557657	0.0723004	0.513935	0.061006	IsoLine	IsoLine	0.634272	0.0806844	0.67703	0.085382	0.684675	0.0858554	IsoLine	IsoLine	0.651412	0.0821382	0.694431	0.0863979	0.736042	0.0897952	0.745365	0.093343	0.737432	0.0937457	0.79437	0.0956489	0.821049	0.0964773	0.806444	0.0963076	0.806868	0.0976034	0.816138	0.0980975	0.805773	0.0986826	0.832016	0.0995314	0.819178	0.096744	0.841378	0.0997505	0.831899	0.100157
Sigma Level	2	0.593587	0.0751443	0.362116	0.0498813	0.636279	0.0806498	0.501529	0.0613406	0.458962	0.0614021	0.62717	0.0804177	0.668979	0.0851777	0.677084	0.0855199	0.668979	0.0851777	0.646033	0.0819409	0.686579	0.0861117	0.729672	0.0899636	0.736558	0.093119	0.728857	0.0935062	0.787475	0.095647	0.811026	0.0969631	0.80002	0.0963859	0.800371	0.0976587	0.807449	0.0975605	0.79911	0.0988012	0.825511	0.0995724	0.811556	0.0971344	0.833921	0.0999461	0.822239	0.0998655
Absolute Errs	FALSE	0.6309	0.0793536	0.380745	0.0521301	0.718871	0.0890642	0.486531	0.0615643	0.454374	0.0613437	0.6186	0.0799206	0.659264	0.0847189	0.667923	0.0849402	0.659264	0.0847189	0.639541	0.0815704	0.677104	0.0855763	0.721799	0.0899581	0.725929	0.0926182	0.718509	0.0929922	0.778955	0.0954369	0.798628	0.0972486	0.79208	0.0962801	0.792344	0.0975227	0.796958	0.0967561	0.790875	0.0987283	0.817473	0.0994225	0.802123	0.097401	0.824704	0.0999444	0.81058	0.099279
Symbol Type	1	0.64117	0.0799316	0.399629	0.0543837	0.805631	0.097544	0.469596	0.0616674	0.4492	0.0611814	0.608938	0.0792146	0.64831	0.0840256	0.657593	0.0841416	0.64831	0.0840256	0.632221	0.0810429	0.666419	0.0848151	0.712637	0.0897788	0.713944	0.0918626	0.706841	0.0922263	0.769041	0.0950245	0.784191	0.097326	0.782842	0.0959929	0.783003	0.0971989	0.785126	0.0957196	0.781294	0.0984661	0.808119	0.0990856	0.791137	0.0975364	0.813977	0.0997454	0.797433	0.0984232
Inverse Plot	FALSE	0.649431	0.0804091	0.418772	0.0566422	0.89677	0.10609	0.451465	0.0616455	0.443665	0.0609222	0.598604	0.0783308	0.636594	0.0831281	0.646546	0.083159	0.636594	0.0831281	0.624393	0.0803815	0.654991	0.0838613	0.702437	0.0894307	0.701126	0.0908852	0.694363	0.0912418	0.758005	0.094421	0.768111	0.0971931	0.772557	0.0955323	0.772605	0.0966962	0.772469	0.0944961	0.770627	0.0980216	0.797706	0.098571	0.778898	0.0975371	0.802034	0.0993545	0.78337	0.0973356
Color Plot	FALSE	0.674557	0.0835884	0.438176	0.0589054	0.99251	0.114702	0.432929	0.0614994	0.438011	0.0605776	0.588051	0.0773078	0.62463	0.0820657	0.635263	0.0820354	0.62463	0.0820657	0.616398	0.0796151	0.643321	0.0827566	0.691476	0.0889232	0.688035	0.0897288	0.681621	0.0900818	0.746148	0.0936428	0.750825	0.0968536	0.761505	0.0949107	0.761432	0.0960283	0.75954	0.0931391	0.759166	0.0974069	0.786518	0.0978927	0.76574	0.097403	0.789199	0.0987824	0.769008	0.0960636
3D plot	FALSE	0.694892	0.0867878	0.457846	0.0611736	IsoLine	IsoLine	0.4148	0.0612355	0.432485	0.0601625	0.57774	0.0761901	0.61294	0.0808847	0.624239	0.0808198	0.61294	0.0808847	0.608587	0.0787771	0.631917	0.0815493	0.680054	0.0882702	0.675245	0.0884438	0.66917	0.088797	0.733792	0.0927112	0.732806	0.0963167	0.749989	0.0941452	0.74979	0.0952135	0.746905	0.0917081	0.747222	0.0966389	0.774859	0.0970692	0.75202	0.0971378	0.775824	0.0980447	0.754973	0.0946629
Linear	FALSE	0.688305	0.0872261	0.477784	0.0634465			0.397869	0.0608655	0.427329	0.059695	0.568122	0.0750268	0.602035	0.0796368	0.613954	0.0795654	0.602035	0.0796368	0.6013	0.0779042	0.621279	0.0802922	0.668482	0.0874895	0.663313	0.0870864	0.657556	0.0874436	0.721275	0.0916515	0.714544	0.095597	0.738322	0.0932566	0.737996	0.0942739	0.735116	0.0902654	0.735123	0.0957384	0.763048	0.096123	0.738115	0.0967487	0.762272	0.0971616	0.741879	0.0931947
Data Range	AC3:AG121	0.727886	0.0880178	0.497996	0.0657244			0.382876	0.0604053	0.422768	0.0591958	0.559616	0.0738686	0.592391	0.0783765	0.604859	0.0783269	0.592391	0.0783765	0.594856	0.0770345	0.611871	0.0790402	0.657075	0.0866024	0.652761	0.085716	0.647286	0.0860806	0.708939	0.0904927	0.696539	0.0947143	0.726823	0.0922692	0.726371	0.0932353	0.724687	0.0888742	0.723198	0.0947301	0.751407	0.0950799	0.724402	0.0962463	0.748914	0.0961571	0.730299	0.0917231
Filled Symbols	FALSE	0.723925	0.0896179	0.518484	0.0680071			0.370477	0.0598753	0.419002	0.0586864	0.552595	0.0727661	0.58443	0.0771589	0.597351	0.0771586	0.58443	0.0771589	0.589537	0.0762061	0.604105	0.0778481	0.646145	0.0856331	0.64405	0.0843924	0.638808	0.0847677	0.697119	0.0892664	0.67928	0.0936926	0.715805	0.0912099	0.715234	0.0921258	0.716075	0.0875953	0.711772	0.0936414	0.740254	0.0939683	0.711257	0.0956443	0.736114	0.0950586	0.720738	0.0903125
ConcAge	FALSE	0.744466	0.0896332	0.539252	0.0702947			0.361213	0.0592985	0.416195	0.0581893	0.547366	0.0717676	0.578501	0.0760372	0.591758	0.0761116	0.578501	0.0760372	0.585575	0.0754551	0.59832	0.0767678	0.635991	0.084608	0.637562	0.0831735	0.632494	0.0835623	0.686139	0.0880061	0.663239	0.0925597	0.705569	0.0901076	0.704887	0.0909759	0.709656	0.0864845	0.701156	0.0925021	0.729892	0.0928185	0.699037	0.0949591	0.72422	0.0938961	0.713615	0.0890245
ConcSwap	FALSE	0.744219	0.0906407	0.560304	0.0725872			0.355489	0.0587001	0.414469	0.0577261	0.544157	0.0709167	0.574861	0.0750605	0.588324	0.0752314	0.574861	0.0750605	0.583143	0.0748144	0.594768	0.0758467	0.626888	0.0835551	0.633579	0.0821126	0.628618	0.082517	0.676297	0.0867461	0.648853	0.0913465	0.696394	0.0889923	0.695613	0.0898168	0.705711	0.0855904	0.691642	0.0913431	0.720604	0.091662	0.688076	0.0942095	0.713559	0.0927012	0.70924	0.0879154
1st Symbol-row	1	0.766254	0.0914429	0.581644	0.0748847			0.353556	0.0581063	0.413901	0.0573171	0.543108	0.0702505	0.573671	0.0742714	0.587201	0.0745567	0.573671	0.0742714	0.582348	0.074312	0.593606	0.075125	0.619086	0.0825031	0.632275	0.081256	0.627352	0.0816774	0.667863	0.0855207	0.636516	0.0900862	0.68853	0.0878946	0.687665	0.0886801	0.704411	0.0849522	0.683487	0.0901962	0.712644	0.0905303	0.678673	0.0934158	0.704419	0.0915067	0.707805	0.0870337
		0.741501	0.091784	0.603276	0.077187			0.355499	0.057543	0.414515	0.0569801	0.544265	0.0697982	0.574982	0.0737044	0.588435	0.0741169	0.574982	0.0737044	0.583224	0.0739698	0.594883	0.0746343	0.612796	0.0814807	0.633709	0.0806411	0.628749	0.0810804	0.661066	0.0843635	0.626562	0.0888132	0.682191	0.0868442	0.681259	0.087597	0.705815	0.0845975	0.676915	0.0890926	0.706229	0.0894542	0.671084	0.0925998	0.697051	0.0903451	0.709373	0.0864179
		0.769276	0.0925699	0.625203	0.0794943			0.361231	0.0570349	0.416284	0.0567299	0.547578	0.0695795	0.578736	0.0733843	0.591975	0.0739312	0.578736	0.0733843	0.585733	0.0738028	0.598544	0.0743959	0.608192	0.0805158	0.637816	0.0802949	0.632749	0.080752	0.656091	0.083306	0.619264	0.0875621	0.677552	0.0858699	0.676571	0.0865969	0.70986	0.0845421	0.672104	0.0880624	0.701533	0.088463	0.665517	0.0917837	0.691656	0.089248	0.713874	0.0860949
		0.745189	0.0925956	0.647431	0.0818065			0.370502	0.0566042	0.41913	0.0565775	0.552902	0.0696041	0.584771	0.0733251	0.597665	0.0740077	0.584771	0.0733251	0.589766	0.0738183	0.60443	0.0744203	0.605397	0.0796347	0.644418	0.0802325	0.639178	0.0807066	0.653075	0.0823769	0.614822	0.086367	0.674738	0.0849983	0.673728	0.0857071	0.71637	0.0847883	0.669187	0.0871337	0.698686	0.0875839	0.662123	0.0909897	0.68838	0.0882454	0.721113	0.0860789
		0.769367	0.0927118	0.669963	0.0841237			0.382908	0.0562696	0.422931	0.0565294	0.560004	0.0698708	0.592822	0.0735294	0.605256	0.0743432	0.592822	0.0735294	0.595145	0.0740157	0.612282	0.0747065	0.60449	0.0788615	0.653225	0.0804565	0.647753	0.0809461	0.6521	0.0816018	0.613355	0.0852607	0.673825	0.0842531	0.672808	0.0849518	0.725059	0.0853253	0.668242	0.0863319	0.697763	0.0868408	0.660994	0.0902395	0.687314	0.0873646	0.730773	0.0863705
		0.776506	0.093118	0.692802	0.0864458			0.397907	0.0560459	0.427518	0.0565878	0.568573	0.070368	0.602536	0.0739882	0.614416	0.0749229	0.602536	0.0739882	0.601637	0.0743862	0.621757	0.0752419	0.605493	0.0782172	0.663854	0.0809573	0.658101	0.08146	0.653192	0.0810016	0.614904	0.0842731	0.67484	0.0836547	0.673836	0.0843518	0.73555	0.0861297	0.669295	0.0856787	0.698792	0.086254	0.662163	0.0895536	0.688486	0.0866296	0.742432	0.086957
		0.761959	0.093305	0.715954	0.0887729			0.414841	0.0559428	0.432693	0.0567501	0.578236	0.0710739	0.613491	0.0746815	0.624746	0.0757215	0.613491	0.0746815	0.608957	0.0749136	0.632442	0.0760031	0.60838	0.0777194	0.675839	0.0817129	0.669768	0.082226	0.656321	0.0805929	0.619427	0.0834314	0.677754	0.0832193	0.676784	0.0839232	0.747382	0.0871662	0.672318	0.0851922	0.701743	0.0858395	0.665596	0.0889507	0.691864	0.0860606	0.75558	0.0878128
		0.784884	0.0937543	0.739423	0.091105			0.432973	0.0559647	0.438228	0.0570093	0.58857	0.0719577	0.625206	0.075579	0.635794	0.0767041	0.625206	0.075579	0.616785	0.0755751	0.64387	0.0769569	0.613073	0.0773817	0.688657	0.0826903	0.682246	0.0832104	0.661402	0.0803866	0.626801	0.0827584	0.682487	0.0829589	0.681571	0.083678	0.760039	0.0883897	0.677228	0.0848854	0.706537	0.0856085	0.6712	0.0884471	0.697356	0.085673	0.769642	0.0889004
		0.780182	0.0938852	0.763213	0.0934421			0.451508	0.0561108	0.443882	0.0573539	0.599123	0.0729808	0.63717	0.0766415	0.647077	0.0778278	0.63717	0.0766415	0.62478	0.0763415	0.65554	0.0780616	0.619442	0.0772133	0.701748	0.0838467	0.694989	0.0843704	0.668297	0.0803886	0.636824	0.0822726	0.688911	0.0828806	0.688068	0.0836226	0.772968	0.0897467	0.683891	0.0847668	0.713041	0.0855675	0.678823	0.0880568	0.704812	0.0854775	0.784005	0.0901724
		0.763789	0.0949342	0.787328	0.0957842			0.469638	0.0563746	0.449408	0.057769	0.609434	0.0740984	0.648861	0.0778225	0.658101	0.0790434	0.648861	0.0778225	0.632591	0.0771795	0.666944	0.0792689	0.627315	0.0772188	0.714538	0.0851317	0.70744	0.0856552	0.676818	0.0805986	0.649222	0.0819871	0.696851	0.0829864	0.696095	0.0837587	0.785603	0.0911777	0.692126	0.0848396	0.72108	0.0857174	0.688255	0.0877902	0.714029	0.0854792	0.798039	0.0915731
		0.789506	0.0950592	0.811773	0.0981313			0.486569	0.0567447	0.454564	0.0582364	0.619052	0.0752617	0.659766	0.0790704	0.668386	0.0802978	0.659766	0.0790704	0.639878	0.0780524	0.677582	0.080526	0.636477	0.0773981	0.72647	0.0864891	0.719054	0.0870087	0.686731	0.081011	0.663659	0.0819097	0.706089	0.0832736	0.705436	0.0840825	0.797392	0.0926204	0.701707	0.0851018	0.730433	0.0860543	0.699241	0.0876548	0.724756	0.0856782	0.811133	0.0930413
		0.791403	0.0952405	0.836552	0.100483			0.501562	0.0572048	0.459125	0.0587357	0.627558	0.0764199	0.66941	0.0803307	0.677481	0.0815362	0.66941	0.0803307	0.646322	0.0789221	0.68699	0.081778	0.646677	0.0777462	0.737022	0.0878595	0.729324	0.0883716	0.697767	0.0816145	0.679739	0.0820426	0.716374	0.0837342	0.715834	0.0845851	0.807821	0.0940116	0.712374	0.0855463	0.740846	0.0865689	0.71148	0.0876541	0.736699	0.0860691	0.822713	0.0945128
		0.807396	0.0954873	0.861671	0.102841			0.513961	0.0577349	0.462891	0.0592451	0.634578	0.0775224	0.67737	0.0815482	0.684989	0.0827045	0.67737	0.0815482	0.651641	0.0797505	0.694756	0.0829701	0.657638	0.0782537	0.745733	0.0891831	0.737802	0.0896845	0.709625	0.0823927	0.697025	0.0823821	0.727426	0.0843558	0.727007	0.085253	0.816433	0.0952905	0.723835	0.086161	0.752035	0.0872472	0.724639	0.0877882	0.749534	0.0866412	0.832274	0.0959234
		0.798659	0.096389	0.887132	0.105203			0.523225	0.0583117	0.465698	0.0597422	0.639808	0.0785209	0.6833	0.0826699	0.690582	0.0837516	0.6833	0.0826699	0.655603	0.0805015	0.700541	0.0840504	0.669061	0.0789067	0.752221	0.090402	0.744116	0.09089	0.72198	0.0833244	0.715044	0.0829191	0.738942	0.0851213	0.738649	0.0860678	0.822852	0.0964013	0.735779	0.086929	0.763693	0.0880707	0.738358	0.0880534	0.76291	0.0873789	0.839397	0.0972114
		0.774537	0.0964092	0.912942	0.10757			0.528948	0.0589101	0.467424	0.0602054	0.643017	0.0793718	0.686939	0.0836466	0.694015	0.0846317	0.686939	0.0836466	0.658035	0.0811422	0.704093	0.0849715	0.680633	0.0796874	0.756204	0.0914629	0.747991	0.0919353	0.734497	0.084384	0.733306	0.0836387	0.750609	0.0860098	0.750443	0.0870074	0.826797	0.0972954	0.747878	0.0878295	0.775504	0.0890169	0.752264	0.0884425	0.776461	0.088262	0.843772	0.0983205
		0.813246	0.0974077	0.939105	0.109942			0.530881	0.0595039	0.467992	0.0606144	0.644066	0.080038	0.68813	0.0844357	0.695139	0.0853065	0.68813	0.0844357	0.65883	0.0816446	0.705255	0.0856932	0.692039	0.0805745	0.757508	0.0923195	0.749258	0.0927748	0.746834	0.0855428	0.751311	0.0845214	0.762108	0.0869972	0.762068	0.0880461	0.828097	0.0979337	0.759803	0.0888378	0.787145	0.09006	0.765976	0.0889449	0.789819	0.0892665	0.845207	0.0992022
		0.796138	0.0978715	0.965626	0.11232			Black	Black	Black	Black	Black	Black	Black	Black	Black	Black	Black	Black	Black	Black	Black	Black	0.702969	0.0815438	Black	Black	Black	Black	0.758653	0.0867691	0.76857	0.0855432	0.773126	0.0880566	0.773205	0.0891555	Black	Black	0.771229	0.0899265	0.798299	0.0911716	0.779122	0.0895469	0.80262	0.090365	Black	Black
		0.833296	0.0979454	0.99251	0.114702																			0.713124	0.0825689					0.769634	0.0880294	0.784611	0.086676	0.783362	0.0891589	0.783552	0.0903055			0.781845	0.0910659	0.808661	0.0923214	0.791342	0.0902321	0.814513	0.0915275
		0.79293	0.0980086	1	0.115359																			0.722227	0.0836218					0.779475	0.0892895	0.798997	0.0878892	0.792538	0.0902741	0.792826	0.0914646			0.791359	0.0922248	0.817949	0.0934779	0.802303	0.0909817	0.825175	0.0927223
		0.831499	0.0981621	IsoLine	IsoLine																			0.730029	0.0846738					0.78791	0.0905148	0.811334	0.0891495	0.800402	0.0913719	0.800774	0.0926012			0.799514	0.0933718	0.825909	0.0946096	0.811706	0.0917754	0.834314	0.0939169
		0.838337	0.0982723																					0.736318	0.0856962					0.794707	0.091672	0.821288	0.0904225	0.80674	0.0924223	0.80718	0.0936843			0.806086	0.0944754	0.832324	0.0956857	0.819295	0.0925914	0.841682	0.0950785
		0.814387	0.0982899																					0.740923	0.0866611					0.799681	0.0927296	0.828586	0.0916737	0.811379	0.0933965	0.811868	0.0946844			0.810897	0.0955056	0.83702	0.0966769	0.824862	0.0934075	0.847077	0.0961756
		0.836604	0.0985374																					0.743717	0.0875422					0.802697	0.0936586	0.833028	0.0928687	0.814194	0.0942682	0.814711	0.0955743			0.813814	0.0964343	0.839867	0.097556	0.828256	0.0942015	0.850353	0.0971782
		0.821378	0.0987304																					0.744625	0.0883154					0.803673	0.0944338	0.834495	0.0939751	0.815106	0.0950134	0.815631	0.0963295			0.814759	0.0972361	0.840789	0.0982991	0.829384	0.0949517	0.851419	0.098059
		0.855619	0.0995124																					Black	Black					Black	Black	Black	Black	Black	Black	Black	Black			Black	Black	Black	Black	Black	Black	Black	Black
		0.830866	0.0995223
		0.835173	0.0997144
		0.833028	0.100115
		0.826569	0.100812
		0.830187	0.100977
		0.871098	0.101519
		0.861036	0.101939
		0.863529	0.101991
		0.852149	0.102611
		0.890402	0.102621
		0.850659	0.102978
		0.853714	0.103259
		0.89202	0.104148
		0.88937	0.104352
		0.890461	0.104927
		0.882294	0.105589
		0.890778	0.106913
		0.927643	0.107375
		0.899655	0.107795
		0.917626	0.107889
		0.897665	0.108163
		0.915876	0.10873
		0.916035	0.108767
		0.921323	0.109188
		0.916968	0.109496
		0.910534	0.109619
		0.952034	0.11021
		0.934171	0.111671
		0.936182	0.112125
		0.994184	0.112146
		0.970239	0.112404
		0.956281	0.112726
		0.969323	0.112902
		0.974604	0.11532
		1.00856	0.115681
		1.0247	0.116452
		1.06395	0.117692
		1.13589	0.124757
		1.26941	0.135263
		1.26682	0.138513
		1.26961	0.140515
		1.39118	0.145328
		1.60776	0.160943
		1.58128	0.165593
		1.63032	0.166203
		1.77209	0.178844
		1.70759	0.171975
		1.69145	0.169763
		1.74193	0.171676
		2.07654	0.190558
		2.31924	0.211867
		3.65212	0.276142
		3.70191	0.275469
		5.56474	0.357639
		5.33084	0.341783
		5.62824	0.358587
		5.67649	0.359821
		5.62716	0.353786
		5.8823	0.36278
		5.47817	0.336678
		5.34006	0.325111
		6.3117	0.378428
		6.52517	0.37116
		7.37143	0.412205
		7.14565	0.389294
		7.15408	0.38492
		7.80768	0.405584
		9.48288	0.452876
		8.75851	0.416903
		10.9255	0.466534
		10.6063	0.446395
		12.1577	0.498305
		13.7455	0.560081
		12.8882	0.521398
		12.9951	0.517329
		13.6104	0.532922
		13.6207	0.528115
		14.9863	0.561449
		24.5042	0.643131
		IsoLine	IsoLine
				0.442219	0.0588051	0.464628	0.0602735	0.443625	0.0593897
				0.440946	0.0589657	0.463762	0.0606045	IsoLine	IsoLine
				0.449139	0.0595977	0.461265	0.060837
				0.447538	0.0600419	0.457338	0.0609522
				IsoLine	IsoLine	0.4523	0.0609409
						0.44656	0.0608039
						0.440582	0.0605523
						0.43485	0.0602066
						0.429829	0.0597946
						0.425926	0.0593499
						0.423457	0.0589083
						0.422622	0.0585058
						0.423488	0.0581748
						0.425986	0.0579423
						0.429912	0.0578271
						0.43495	0.0578384
						0.44069	0.0579754
						0.446668	0.058227
						0.4524	0.0585727
						0.457421	0.0589847
						0.461324	0.0594295
						0.463793	0.059871
						0.464628	0.0602735
[truncated: 206 more columns]

## Sheet: data table
AD-PO-57	207Pb	Ua	Pba	Thc	206Pb	206Pbe	2 s	207Pbe	2 s	207Pbe	2 s	rho	206Pb	2 s	207Pb	2 s	207Pb	2 s
Spot number	(cps)	(ppm)	(ppm)	U	204Pb	238U	%	235U	%	206Pb	%		238U	(Ma)	235U	(Ma)	206Pb	(Ma)	conc %
A-175	17287.2	630.772	69.8032	0.926621	4.42752	0.1113	6.14039	1.013	8.36812	0.066	5.7	0.733784	680.312	39.6451	710.173	42.7497	805.765	119.011	84.4305
A-176	2760.77	109.456	11.4837	0.430015	1.0299	0.1055	6.29715	0.9702	8.82722	0.06675	6.2	0.713379	646.292	38.7244	688.576	44.1376	829.281	129.009	77.934
A-177	12750.8	479.011	63.893	1.15215	0	0.133	6.04278	1.394	7.79433	0.07603	4.9	0.775279	804.905	45.7246	886.257	46.0792	1095.19	98.556	73.4948
A-178	2310.46	115.543	10.5966	0.485355	0.461532	0.09271	6.39678	0.7694	8.71418	0.0602	5.9	0.734066	571.555	34.9872	579.4	38.4744	610.276	127.901	93.6552
A-179	13607.1	91.0647	33.4156	0.363168	0.16537	0.3538	6.12147	5.627	6.57053	0.1154	2.4	0.931656	1952.65	103.125	1920.27	56.649	1885.48	42.9852	103.563
A-180	94827.3	650.642	220.092	0.493625	0.1898	0.3251	6.2362	5.34	6.35987	0.1192	1.2	0.980555	1814.64	98.6319	1875.3	54.3915	1943.19	22.3188	93.3847
A-181	13271.9	57.0702	24.496	0.660946	1.18493	0.4056	6.7004	7.808	7.91929	0.1397	4.2	0.846086	2194.7	124.636	2209.09	71.2815	2222.47	73.1388	98.7503
A-182	2681.67	173.601	13.7022	0.372994	0	0.07993	6.13959	0.6412	6.87768	0.05819	3.1	0.892683	495.714	29.294	503.03	27.283	536.445	67.8345	92.4073
A-183	38775.2	885.003	111.367	0.349772	0	0.1238	6.84139	1.569	7.61388	0.09196	3.3	0.898542	752.147	48.5688	957.926	47.2135	1466.04	63.4691	51.3046
A-184	2464.82	201.124	11.8542	0.5342	0.431737	0.05978	6.30354	0.465	9.40468	0.05643	7	0.670255	374.293	22.9218	387.753	30.3118	468.874	154.521	79.8281
A-188	9238.01	408.818	39.5385	0.164874	0.19788	0.09787	6.13917	0.7961	6.54747	0.05901	2.3	0.937641	601.923	35.2804	594.648	29.4681	566.988	49.5505	106.162
A-189	58763.6	174.908	106.942	1.36241	0	0.5601	6.29898	13.75	6.43478	0.178	1.3	0.978896	2866.96	145.778	2732.33	60.9066	2634.28	21.847	108.833
A-190	6481.77	226.405	24.7363	0.869611	1.51142	0.1102	6.24406	0.952	9.94004	0.06267	7.7	0.628173	673.965	39.9576	679.161	49.2247	696.423	164.794	96.7752
A-191	4125.78	196.087	18.3523	0.737048	0	0.09048	7.15783	1.399	12.6802	0.1122	10	0.564489	558.358	38.2843	888.72	75.0941	1835.09	189.608	30.4267
A-192	111951	323.809	189.469	0.649657	0.0535486	0.5329	6.11727	13.61	6.1849	0.1853	0.91	0.989066	2753.75	137.094	2722.98	58.5021	2700.24	15.0597	101.982
A-193	56728.3	147.374	91.4505	0.525038	0.0768447	0.5614	6.1183	14.99	6.22441	0.1936	1.1	0.982953	2872.62	141.818	2814.37	59.2481	2772.9	18.7681	103.596
A-194	16396.2	263.226	56.0987	0.670724	0.576138	0.2119	6.42769	2.319	7.21483	0.07942	3.3	0.8909	1238.76	72.4405	1218.19	51.1874	1181.94	64.7703	104.807
A-195	9936.33	61.641	23.9713	1.64697	0.450951	0.3712	6.24032	6.525	6.79026	0.1275	2.7	0.91901	2034.86	108.892	2049.3	59.7849	2063.87	47.2054	98.5944
A-196	39891.9	400.831	66.8784	0.70596	0.454285	0.1606	9.68117	2.595	10.0929	0.1172	2.9	0.95921	960.22	86.3684	1299.31	73.9769	1913.79	51.1995	50.1738
A-197	7082.23	348.973	33.225	0.533832	0	0.09641	6.26425	0.7745	7.45256	0.05828	4	0.84055	593.331	35.5086	582.362	33.0288	539.816	88.3035	109.914
A-198	10227.6	440.63	41.6622	0.211839	0.891501	0.09549	6.32527	0.8074	7.21151	0.06134	3.5	0.877108	587.908	35.5415	600.992	32.7107	650.662	74.3599	90.3554
A-199	9761.94	407.09	43.5572	0.187386	0.657774	0.1082	6.73675	0.8977	7.68231	0.06021	3.7	0.876917	662.072	42.3881	650.479	36.8992	610.457	79.8046	108.455
A-200	10498.1	416.033	47.7353	0.354239	0.194415	0.1157	6.11138	1.009	6.53374	0.06325	2.3	0.935358	705.657	40.8489	708.144	33.3125	716.038	49.0837	98.5502
A-201	3288.6	219.461	16.2717	0.239729	0	0.07514	6.07201	0.5936	6.94856	0.05731	3.4	0.873852	467.074	27.3577	473.156	26.2805	502.757	74.3593	92.9026
A-202	8205.47	369.521	36.0627	0.351303	0.118399	0.09854	6.06579	0.8366	7.09702	0.06159	3.7	0.854695	605.832	35.0745	617.27	32.8254	659.445	78.9821	91.87
A-203	2843.9	138.092	11.8222	0.52201	0.571766	0.08651	6.30544	0.724	7.87039	0.06072	4.7	0.801159	534.841	32.3629	553.052	33.5617	628.765	101.488	85.0621
A-204	28246.3	971.91	120.561	0.121896	1.588	0.1248	6.81169	1.136	7.71218	0.06605	3.6	0.883239	757.884	48.7056	770.559	41.6452	807.477	75.6839	93.8583
A-205	3688.65	207.795	18.621	0.269581	0	0.09064	6.33028	0.7442	7.8403	0.05957	4.6	0.807403	559.325	33.9143	564.865	33.9674	587.237	100.367	95.2468
A-206	14920.1	134.689	37.767	0.745439	0.132862	0.2699	6.20909	4.359	6.73752	0.1172	2.6	0.92157	1540.53	85.0824	1704.69	55.647	1912.82	46.9412	80.5373
A-207	41521.6	181.674	80.9955	0.487063	0.0770061	0.4169	6.21966	8.759	6.38635	0.1524	1.4	0.9739	2246.4	117.972	2313.18	58.2008	2372.67	24.7179	94.6783
A-211	4398.28	226.098	20.0481	0.343268	0.322462	0.08963	6.15606	0.7445	7.7531	0.06026	4.7	0.794012	553.368	32.6445	565.008	33.596	612.153	101.836	90.3969
A-212	4422.52	99.4433	17.7735	0.584446	0.371166	0.1788	6.28631	1.772	7.70126	0.07188	4.4	0.81627	1060.66	61.4798	1035.29	49.9885	982.083	90.5952	108.001
A-213	7266.92	367.794	36.2965	1.1381	0.114001	0.09971	6.05851	0.8352	7.26506	0.06076	4	0.833923	612.735	35.4129	616.478	33.5713	630.25	86.3702	97.2209
A-214	18257.4	851.747	77.0855	0.336264	1.54056	0.09144	6.17973	0.7663	6.5945	0.06079	2.3	0.937103	564.065	33.3762	577.612	29.049	631.263	49.5769	89.355
A-215	9244.61	292.633	29.6351	0.506409	2.56614	0.1018	6.26501	0.9312	7.64444	0.06635	4.4	0.81955	625.097	37.3235	668.273	37.4278	816.72	91.5356	76.5375
A-216	3368.21	155.706	16.0959	0.818504	0	0.1044	6.25884	0.8894	7.27635	0.06183	3.7	0.860162	639.862	38.1246	646.031	34.7783	667.652	79.449	95.8377
A-217	16557.6	580.998	47.6229	0.32748	4.43496	0.08282	7.20796	0.6936	10.3872	0.06076	7.5	0.693924	512.942	35.54	534.957	43.1942	629.964	161.125	81.424
A-218	1530.8	65.4072	6.69967	2.04617	0.853676	0.1029	6.43287	0.9563	9.44874	0.06742	6.9	0.680818	631.351	38.6885	681.356	46.8978	850.259	143.855	74.2539
A-219	12025.9	480.932	53.6709	0.365374	0.7386	0.1121	6.55243	1.042	7.72154	0.06742	4.1	0.848591	684.955	42.579	724.829	40.0047	850.237	84.9128	80.5604
A-220	2200.11	93.4033	9.50455	0.502506	0.794596	0.1026	6.44398	0.8904	8.10807	0.06295	4.9	0.794762	629.75	38.6618	646.585	38.7774	705.824	104.692	89.222
A-221	8264.64	310.834	42.8201	0.189804	0	0.1385	6.40921	1.267	7.96805	0.06635	4.7	0.804363	836.247	50.266	830.968	45.2147	816.875	98.9264	102.371
A-222	1967.03	78.423	8.74157	0.731007	0	0.1116	10.2026	1.1	11.6822	0.07154	5.7	0.873346	681.868	66.0153	753.434	62.1384	972.214	116.055	70.1356
A-223	5056.98	338.565	25.0534	0.203399	2.11753	0.07482	7.10683	0.6191	8.50962	0.06003	4.7	0.835152	465.114	31.8905	489.289	33.0394	604.138	101.266	76.988
A-224	9558.07	218.956	36.345	0.533628	0.288312	0.1662	6.11606	1.63	7.09731	0.07116	3.6	0.861743	991.154	56.1893	981.982	44.6671	961.531	73.5581	103.081
A-225	6833.71	344.496	32.2993	0.33479	0.249869	0.09493	6.13327	0.7638	6.95089	0.05837	3.3	0.882373	584.653	34.2803	576.194	30.5631	542.973	71.4991	107.676
A-226	7832.9	625.714	56.4824	0.158717	4.15749	0.09057	7.01182	0.8594	9.40316	0.06885	6.3	0.745687	558.881	37.5371	629.812	44.1301	893.502	129.348	62.5495
A-227	2708.29	121.786	12.6244	1.75295	0.467168	0.1043	6.12118	0.9474	8.84766	0.06592	6.4	0.691841	639.374	37.2589	676.724	43.7045	803.075	133.791	79.6157
A-228	11634.7	542.823	51.1445	0.270671	0.287635	0.09524	6.04225	0.7914	6.87363	0.06028	3.3	0.879048	586.456	33.8711	591.968	30.8333	613.15	70.7914	95.6464
A-229	11197	93.1346	26.8576	0.378565	0.119009	0.2762	6.51689	4.694	7.29579	0.1233	3.3	0.89324	1572.23	90.9227	1766.1	61.0691	2003.74	58.2409	78.4649
A-230	17405.2	636.789	53.5667	0.684702	2.34083	0.0847	6.1777	0.7562	9.49857	0.06477	7.2	0.650383	524.1	31.0961	571.828	41.5296	766.409	151.997	68.3839
A-234	6276.92	320.574	29.5366	0.447488	0.331754	0.09312	6.20387	0.7765	7.22913	0.0605	3.7	0.858176	573.951	34.068	583.488	32.0844	620.783	80.07	92.456
A-235	18451.6	812.224	71.5651	0.275974	0.465557	0.08834	6.61743	0.8485	7.18312	0.06968	2.8	0.921247	545.684	34.6241	623.815	33.4788	918.458	57.46	59.413
A-236	5850.55	307.769	27.2723	0.696446	0.289152	0.0895	6.17411	0.7559	7.23162	0.06128	3.8	0.853766	552.551	32.6939	571.659	31.6111	648.39	80.8644	85.2189
A-237	5195.05	213.238	23.1862	0.723712	0.257303	0.1093	6.09175	1.011	7.62806	0.06716	4.6	0.798597	668.401	38.6775	709.604	38.9474	842.272	95.5509	79.3568
A-238	2790.62	120.924	12.9226	0.807038	0	0.1079	6.25341	0.9176	8.58034	0.0617	5.9	0.728807	660.475	39.2568	661.104	41.6904	663.251	125.869	99.5814
A-239	7476.33	221.252	30.8983	0.417307	0.453282	0.1405	6.1517	1.27	7.31689	0.06555	4	0.840754	847.576	48.858	832.217	41.56	791.428	83.1186	107.094
A-240	3291.43	151.676	14.6197	1.37452	0.433153	0.09741	6.35529	0.8132	8.40269	0.06057	5.5	0.75634	599.199	36.3646	604.273	38.266	623.353	118.548	96.1251
A-241	26630.6	205.958	72.8742	0.920348	0.188577	0.3418	6.07687	5.331	6.40612	0.1132	2	0.948604	1895.24	99.7853	1873.82	54.7721	1850.15	36.6583	102.437
A-242	5426.57	321.997	25.5758	0.454256	0.238824	0.08041	6.13266	0.6494	7.02364	0.05859	3.4	0.873145	498.564	29.4228	508.128	28.0796	551.406	74.7367	90.4169
A-243	1314.27	71.7492	7.5549	0.820812	0	0.107	6.63937	0.7953	14.3148	0.0539	13	0.463813	655.519	41.3826	594.167	64.3879	366.351	285.838	178.932
A-244	21630.1	123.827	53.5772	0.996205	0	0.4122	6.195	7.371	6.51227	0.1297	2	0.951281	2224.99	116.567	2157.51	58.2256	2093.89	35.2871	106.261
A-245	5445.85	470.549	26.0599	0.375515	0.696803	0.05625	6.19739	0.4256	8.70683	0.0549	6.1	0.711785	352.771	21.2752	360.064	26.3943	407.326	136.852	86.6065
A-246	8425.55	376.909	40.5712	0.717897	0.166878	0.1087	6.1744	0.9159	6.80812	0.06111	2.9	0.906916	665.366	39.0333	660.177	33.0466	642.488	61.6633	103.561
A-247	7190.4	353.871	31.8135	0.489373	1.26571	0.09057	6.41956	0.8011	7.58668	0.06417	4	0.846163	558.886	34.3668	597.449	34.2634	746.687	85.4457	74.8487
A-248	2933.58	131.448	11.3954	0.78197	1.06933	0.08739	6.22654	0.7634	8.43887	0.06337	5.7	0.737841	540.105	32.2596	575.942	37.0936	719.98	120.901	75.0167
A-249	9434.78	408.969	42.205	0.464027	0.162188	0.1041	6.24837	0.892	6.82939	0.06214	2.8	0.914923	638.669	37.9933	647.454	32.6934	678.208	58.9107	94.1702
A-250	4449.81	221.996	22.407	0.657433	0.182818	0.1019	6.29387	0.861	7.26626	0.06128	3.6	0.866178	625.764	37.5336	630.688	34.1356	648.381	77.987	96.5118
A-251	5904.36	288.227	28.0606	1.00378	0.55931	0.09827	6.54275	0.8383	7.79337	0.06189	4.2	0.839528	604.276	37.7398	618.228	36.0868	669.65	90.6195	90.2376
A-259	6466.8	294.879	29.6661	0.111336	0.163545	0.1015	6.14976	0.8711	6.77702	0.06225	2.8	0.907442	623.306	36.5369	636.163	32.0361	682.109	60.8167	91.3791
A-260	3886.33	187.858	20.0378	1.3358	0.543484	0.1078	6.37253	0.8997	7.83977	0.06055	4.6	0.812846	659.931	39.9733	651.543	37.6994	622.597	98.4956	105.996
A-261	6915.45	343.446	34.8624	0.674707	0.287576	0.1026	6.31674	0.8521	7.14582	0.06025	3.3	0.883977	629.693	37.8951	625.828	33.3827	611.884	72.1892	102.911
A-262	16313.2	744.892	72.2677	0.123814	2.56958	0.09795	6.4325	0.8333	7.24298	0.06172	3.3	0.888102	602.357	36.9915	615.439	33.4283	663.869	71.318	90.7343
A-263	1356.54	63.0829	6.29807	0.527166	0.953253	0.101	6.43746	0.8302	10.4198	0.05965	8.2	0.61781	620.13	38.0606	613.716	47.9921	590.118	177.688	105.086
A-264	2983.4	158.527	14.5176	0.440143	0	0.09257	6.1877	0.7693	7.59573	0.06029	4.4	0.814628	570.718	33.7962	579.348	33.5341	613.331	95.168	93.0522
A-265	4795.42	213.815	23.1146	1.37589	0	0.1092	6.56611	0.9213	7.78562	0.06122	4.2	0.843364	668.031	41.6674	663.059	37.9083	646.191	89.8821	103.38
A-266	6572.6	303.433	32.2996	0.502579	0.220156	0.1074	6.24628	0.9276	6.84582	0.06268	2.8	0.912421	657.485	39.0434	666.394	33.4511	696.645	59.6942	94.3787
A-267	8711.29	351.903	39.3738	0.336911	0.972343	0.1129	6.27365	0.9693	7.07849	0.06229	3.3	0.886299	689.581	41.0284	688.115	35.3771	683.324	69.9992	100.916
A-268	5700.78	248.485	26.7563	0.579436	0.224429	0.1088	6.08687	0.916	6.88282	0.0611	3.2	0.884357	665.584	38.4919	660.261	33.4122	642.122	69.0763	103.654
A-269	38744.5	389.655	118.965	0.191311	0.29511	0.2935	6.75148	4.816	6.96289	0.119	1.7	0.969638	1658.81	98.7452	1787.63	58.5431	1941.47	30.455	85.4407
A-270	738.766	36.7561	3.29221	0.888659	0	0.09037	6.97152	0.7769	12.7464	0.06236	11	0.546942	557.752	37.2491	583.708	56.5868	686.017	227.758	81.303
A-271	12470	530.058	64.0983	0.436828	0	0.1221	6.14024	1.034	6.56622	0.0614	2.3	0.935126	742.741	43.0768	720.693	33.8858	652.665	49.9309	113.801
A-272	16772.4	111.783	44.0815	1.58233	0.369755	0.3784	6.0863	6.312	6.48893	0.121	2.3	0.937951	2068.94	107.714	2020.08	56.8763	1970.52	40.1088	104.995
A-273	7359.75	325.387	31.6306	1.05703	0.401423	0.09816	6.23567	0.8315	7.53006	0.06145	4.2	0.828104	603.629	35.9318	614.444	34.7123	654.502	90.5656	92.2272
A-274	3565.9	188.864	18.0065	0.750161	0	0.09639	6.12134	0.7987	8.60441	0.06011	6	0.711419	593.212	34.6919	596.072	38.7939	606.97	130.768	97.7334
A-275	17617.2	604.037	48.6462	0.374802	5.15807	0.08123	7.60721	0.7027	10.1856	0.06276	6.8	0.746863	503.468	36.8425	540.389	42.6814	699.365	144.249	71.9894
A-276	2386.29	131.021	11.198	0.479837	0.432808	0.08633	6.22992	0.7272	9.40129	0.06111	7	0.662667	533.802	31.9158	554.887	40.1898	642.368	151.365	83.0991
A-280	8567.39	423.17	44.7637	0.807081	0	0.1069	6.20274	0.8908	7.05445	0.06045	3.4	0.879265	654.796	38.6206	646.787	33.746	618.931	72.5225	105.795
A-281	13048.7	75.4761	30.624	0.661641	0.107582	0.3849	6.39365	7.154	6.88291	0.1348	2.5	0.928916	2099.23	114.555	2130.8	61.317	2161.39	44.4545	97.1238
A-282	1142.15	62.0376	5.49194	0.649002	0	0.08962	7.02947	0.7239	12.4798	0.0586	10	0.563266	553.277	37.2701	552.981	53.2126	551.765	225.081	100.274
A-283	4949.39	272.157	23.3215	0.415078	0.434707	0.08679	6.18241	0.6949	7.36274	0.05809	4	0.839689	536.511	31.8266	535.735	30.651	532.431	87.5638	100.766
A-284	5624.37	269.351	28.1439	1.81595	0.496178	0.1056	6.07683	0.8823	7.0916	0.06062	3.7	0.856906	647.081	37.4129	642.221	33.752	625.166	78.8129	103.505
A-285	3590.9	179.555	18.5939	0.988585	0	0.1048	6.26159	0.852	7.7947	0.05898	4.6	0.803314	642.468	38.289	625.729	36.4099	565.673	101.089	113.576
A-286	4789.25	132.066	21.8058	0.865781	0	0.1656	6.22747	1.581	7.34892	0.06928	3.9	0.847399	987.786	57.0329	962.874	45.7117	906.413	80.394	108.977
A-287	3095.29	171.925	16.9814	0.602473	0	0.1001	6.26055	0.7897	7.76005	0.05723	4.6	0.806767	615.061	36.7263	591.002	34.7678	499.669	100.976	123.094
A-288	3282.34	164.892	16.6538	0.643646	0	0.102	6.30939	0.8635	7.8912	0.06142	4.7	0.799547	626.066	37.6434	632.047	37.129	653.501	101.703	95.8018
A-289	6086.29	331.2	32.3509	1.22113	0.0837233	0.09873	6.26085	0.8214	7.08439	0.06036	3.3	0.883753	606.964	36.267	608.817	32.4396	615.717	71.5875	98.5784
A-290	18811.4	136.788	50.6333	1.47605	1.02745	0.3576	6.27577	5.565	6.84529	0.1129	2.7	0.916801	1970.97	106.573	1910.66	58.9181	1845.8	49.456	106.782
A-291	5592.38	272.571	27.9105	0.481501	0.33677	0.1031	6.41669	0.9177	7.18596	0.06457	3.2	0.892948	632.661	38.6674	661.163	34.9176	759.617	68.2207	83.2869
A-292	15203	648.158	70.976	0.0802657	1.06661	0.1102	7.08374	0.9971	7.51374	0.06566	2.5	0.942772	673.739	45.3166	702.321	38.0907	794.867	52.5381	84.7612
A-293	3905.16	143.868	11.5264	0.45177	3.45315	0.08004	7.13697	0.8129	10.0134	0.07368	7	0.712745	496.384	34.0971	604.068	45.5897	1032.01	141.946	48.0989
A-294	12295.7	97.2413	36.1201	0.531253	0.131231	0.3586	6.09659	5.628	6.60191	0.1139	2.5	0.923458	1975.47	103.732	1920.43	56.9212	1861.52	45.7421	106.121
A-295	16279.5	164.9	46.4076	0.563284	1.60015	0.2755	6.2588	3.702	7.87995	0.09749	4.8	0.794269	1568.5	87.139	1571.78	62.9949	1576.18	89.611	99.5128
A-296	5957.16	282.183	28.1226	1.2368	0.60813	0.1008	6.16899	0.8266	7.74317	0.05948	4.7	0.796702	619.166	36.4193	611.707	35.5788	584.183	101.59	105.988
A-297	7444.67	362.085	35.864	0.604926	0.576553	0.1001	6.26389	0.833	7.52046	0.06037	4.2	0.832914	615.083	36.7471	615.291	34.7028	616.059	89.8654	99.8415
A-298	1672.83	104.425	9.41989	0.78529	0	0.09154	6.47764	0.7053	11.2881	0.0559	9.2	0.573848	564.625	35.0184	541.964	47.4057	447.753	205.416	126.102
A-299	4538.24	186.587	21.8256	0.0938214	0	0.1177	6.27738	1.064	7.90034	0.06558	4.8	0.794571	717.266	42.611	735.768	41.3521	792.52	100.628	90.5044
A-303	38660.2	124.584	72.3442	1.96618	0.1586	0.5281	6.14393	13.62	6.27526	0.1871	1.3	0.979072	2733.5	136.879	2723.71	59.3599	2716.45	21.0539	100.628
A-304	2291.24	123.77	11.4956	0.686112	0.503583	0.09389	6.48593	0.7802	9.3284	0.06029	6.7	0.695288	578.474	35.8852	585.587	41.5115	613.262	144.839	94.3273
A-305	3356.85	209.516	17.2988	0.833024	0.607561	0.08359	6.25044	0.6746	8.48724	0.05855	5.7	0.736451	517.506	31.0821	523.48	34.7148	549.622	125.369	94.1568
A-306	7403.81	402.532	39.1347	1.22279	0.158485	0.09829	6.18236	0.8144	6.64379	0.06011	2.4	0.930548	604.379	35.6668	604.912	30.2793	606.908	52.6102	99.5833
A-307	17566.8	110.094	45.1154	0.575103	0.208952	0.3893	6.21344	7.146	6.51048	0.1332	1.9	0.954374	2119.56	112.237	2129.75	57.9908	2139.6	33.9916	99.063
A-308	5899.67	313.679	29.1049	0.310638	0	0.09375	6.06963	0.7849	7.37966	0.06074	4.2	0.822482	577.702	33.5391	588.265	32.9505	629.237	90.4362	91.8099
A-309	6141.72	366.624	31.9153	0.454036	0.587281	0.08802	7.10744	0.7279	8.50739	0.06	4.7	0.835443	543.803	37.0652	555.312	36.3894	602.781	101.181	90.2158
A-310	2554.34	122.992	11.9084	0.928119	1.20737	0.09801	6.32131	0.7929	8.92541	0.05869	6.3	0.708238	602.728	36.3734	592.833	40.0802	555.14	137.459	108.572
A-311	6419.1	396.334	17.605	0.505609	0	0.04243	7.35926	0.7395	11.7054	0.1264	9.1	0.628707	267.904	19.3117	562.122	50.5283	2048.42	160.799	13.0786
A-312	9921.56	403.865	44.5631	1.00597	0.700723	0.1109	6.27205	1.022	8.42524	0.06684	5.6	0.744436	677.964	40.3626	714.786	43.2341	832.196	117.267	81.4668
A-313	18325	901.845	91.3813	0.730687	0	0.1014	6.41578	1.001	7.16275	0.07161	3.2	0.895714	622.698	38.0821	704.373	36.3849	974.423	64.9309	63.9043
A-314	5429.12	334.303	28.7703	0.120138	0.11959	0.08723	6.12271	0.6883	7.23575	0.05725	3.9	0.846174	539.111	31.6657	531.781	29.9532	500.454	84.906	107.724
A-315	2426.67	114.157	12.3708	0.752042	0.905198	0.1095	6.20903	0.917	8.26649	0.06075	5.5	0.751108	669.823	39.5017	660.755	40.1504	629.932	117.567	106.333
A-316	2543.51	142.31	13.1238	0.81196	0	0.09331	6.26999	0.762	9.48029	0.05924	7.1	0.661371	575.054	34.4944	575.139	41.6281	575.478	154.59	99.9263
A-317	5604.94	143.045	24.5878	0.326348	0	0.172	6.21908	1.708	6.78725	0.07203	2.7	0.916288	1022.98	58.8289	1011.38	43.4635	986.335	55.3221	103.716
A-318	23187	1136.29	125.575	0.0992659	0	0.1117	6.11444	0.9342	6.35337	0.06069	1.7	0.962393	682.447	39.595	669.827	31.1577	627.602	37.1963	108.739
A-319	6032.39	214.553	16.9891	0.505987	0.923045	0.07866	7.86907	0.8708	9.58877	0.08032	5.5	0.820655	488.102	36.991	636.01	45.3198	1204.23	107.95	40.5322
A-320	2343.53	115.337	11.9857	1.26973	0	0.1049	6.63317	0.8905	8.05972	0.06157	4.6	0.823002	643.218	40.6062	646.617	38.5476	658.501	98.1614	97.6792
A-321	7786.64	388.598	43.3005	1.35455	0	0.1124	6.12223	0.9702	7.03423	0.06262	3.5	0.870349	686.697	39.8794	688.587	35.1727	694.767	73.827	98.8384
A-322	11315.9	484.909	50.6325	0.355379	1.04923	0.1048	6.48457	0.9816	9.18288	0.06792	6.5	0.706158	642.736	39.6682	694.44	46.1885	865.652	134.822	74.2487
A-326	4448.37	232.303	23.6583	0.81652	0.151967	0.103	6.06777	0.8507	7.49383	0.05993	4.4	0.809702	631.839	36.5196	625.011	34.9754	600.374	95.2076	105.241
A-327	12536	641.278	56.0369	0.619793	1.56374	0.08829	6.9984	0.7397	8.57172	0.06078	4.9	0.816453	545.426	36.6009	562.234	37.0068	630.852	106.608	86.4586
A-328	4316.53	199.123	19.6388	0.694565	0.357904	0.09951	6.25091	0.8556	7.94168	0.06238	4.9	0.787102	611.551	36.4703	627.729	37.1821	686.459	104.548	89.0877
A-329	9695.2	76.2142	28.7312	0.945943	0.152633	0.3628	6.09554	5.882	6.95095	0.1176	3.3	0.876937	1995.34	104.604	1958.63	60.3237	1920.05	59.9024	103.921
A-330	3179.45	163.826	17.7655	0.895998	0	0.1096	6.27759	0.9105	9.29696	0.06026	6.9	0.675231	670.535	39.9782	657.342	44.9896	612.327	148.164	109.506
A-331	3615.7	200.231	19.7187	0.526972	0	0.09952	6.26464	0.8309	7.41975	0.06057	4	0.84432	611.609	36.5537	614.093	34.1896	623.264	85.745	98.13
A-332	55756.8	1591.99	67.0044	0.578269	27.1448	0.04244	6.91048	0.3684	14.2651	0.06297	12	0.484433	267.967	18.1382	318.473	38.9958	706.601	265.463	37.9233
A-333	3007.62	185.019	16.775	0.430982	0	0.09178	6.24806	0.7415	8.07266	0.05861	5.1	0.773978	566.079	33.8605	563.281	34.9007	551.994	111.572	102.552
A-334	8512.41	401.158	44.5089	0.217632	0.163523	0.1121	6.05284	0.9362	6.41432	0.06057	2.1	0.943646	685.077	39.3393	670.882	31.4916	623.497	45.7816	109.877
A-335	5018.45	267.83	27.352	1.71152	0.515163	0.1033	6.25392	0.8537	7.82368	0.05998	4.7	0.799358	633.479	37.7329	626.685	36.5856	602.241	101.74	105.187
A-340	12019.3	100.207	35.0702	0.643635	0.140508	0.3367	6.16773	5.478	6.98872	0.118	3.3	0.882526	1870.67	100.146	1897.18	60.0082	1926.31	58.8882	97.1115
A-341	46745.3	195.686	99.016	0.679276	1.68987	0.4665	6.18582	10.93	6.60165	0.1699	2.3	0.937012	2468.34	126.855	2516.81	61.4111	2556.13	38.6009	96.5657
A-342	98572.9	377.97	183.358	0.125041	0	0.4464	6.17657	10.61	6.31401	0.1724	1.3	0.978234	2379.21	122.885	2489.26	58.5875	2580.33	21.8808	92.2055
A-343	5722.74	265.124	30.2737	1.48216	0.682411	0.1153	6.20746	0.9746	7.22381	0.06131	3.7	0.859306	703.571	41.375	690.834	36.203	649.586	79.335	108.311
A-344	6502.21	371.583	34.9428	0.641674	0	0.09506	6.28098	0.7895	7.17038	0.06025	3.5	0.875961	585.389	35.1481	590.892	32.1214	612.083	74.7359	95.6388
A-345	71358.6	133.543	101.105	0.995171	0.050112	0.6431	6.10479	24.5	6.27379	0.2764	1.4	0.973063	3201.31	154.034	3288.66	61.2052	3342.36	22.6182	95.7801
AD-PO-57 (Rims only)
A-41	4664.29	272.057	15.7859	0.459535	0	0.05897	3.37618	0.4409	5.0116	0.05425	3.7	0.673673	369.333	12.1189	370.92	15.572	380.847	83.2653	96.9766
A-42	4248.33	235.685	13.9229	0.530692	0	0.06004	3.33247	0.4475	5.06964	0.05408	3.8	0.657338	375.88	12.1679	375.554	15.915	373.54	86.0004	100.627
A-43	11658.5	720.207	42.2531	0.210083	0.89531	0.0596	3.40384	0.4491	16.0206	0.05467	16	0.212467	373.179	12.3417	376.676	50.4171	398.238	350.87	93.7074
A-44	9925.51	606.803	35.1228	0.241244	0.0190145	0.05881	3.98637	0.4422	16.3819	0.05456	16	0.243339	368.355	14.2723	371.816	51.0036	393.444	356.43	93.6232
A-45	7946.44	646.969	59.1653	0.0449603	1.47133	0.0926	4.37511	0.7452	9.23173	0.05838	8.1	0.473921	570.87	23.9022	565.429	40.0255	543.604	177.686	105.016
A-46	13835.8	371.739	59.8212	0.0651586	0	0.1609	4.01597	1.608	5.58176	0.07247	3.9	0.719482	962.013	35.8897	973.235	34.9425	998.654	78.7433	96.331
A-47	27017.6	676.165	116.182	0.0622621	0	0.1717	3.81306	1.742	5.24569	0.07361	3.6	0.726894	1021.34	36.0159	1024.18	33.8382	1030.25	72.8251	99.1349
A-48	11166.9	66.1121	35.934	0.533834	0	0.4983	4.46227	12.16	6.32917	0.177	4.5	0.705033	2606.51	95.6686	2616.65	59.3811	2624.51	74.6407	99.3141
A-49	15983.6	91.8096	52.3108	0.4175	0	0.5214	3.36789	12.89	4.21525	0.1793	2.5	0.798978	2705.11	74.4051	2671.51	39.7191	2646.18	42.0663	102.227
A-50	137844	439.186	172.013	0.392916	0.928554	0.3601	3.62529	8.613	5.3864	0.1735	4	0.673046	1982.51	61.8711	2297.9	49.003	2591.52	66.4587	76.5
A-51	20727.5	224.937	69.7977	0.116224	0.949838	0.297	4.45443	5.084	5.06374	0.1242	2.4	0.879672	1676.32	65.7514	1833.44	42.9653	2016.82	42.6962	83.1168
A-52	19441.1	249.77	86.1394	0.188872	0	0.3272	3.66276	6.084	4.54071	0.1349	2.7	0.80665	1824.57	58.2047	1987.97	39.5972	2162.43	46.8042	84.3759
A-59	49739.8	179.268	66.8507	0.259975	1.87991	0.3598	3.25555	5.676	3.82949	0.1145	2	0.850126	1981.33	55.5326	1927.8	33.06	1870.73	36.3728	105.912
A-60	1530.25	63.0595	7.02084	0.713593	0	0.1121	4.13505	0.9942	9.62186	0.06431	8.7	0.429756	685.2	26.8795	700.853	48.7069	751.368	183.469	91.1936
A-61	711.973	45.7377	4.00635	0.62706	0	0.08724	6.19657	0.9288	11.7101	0.07723	9.9	0.529163	539.217	32.0537	666.982	57.2554	1126.59	197.993	47.8628
A-62	19681.2	398.22	76.3088	0.171995	0	0.1906	3.38879	2.077	4.13785	0.07906	2.4	0.818975	1124.4	34.9655	1141.09	28.3584	1172.98	46.9924	95.8583
A-63	85070.2	2161.61	51.3222	0.334143	24.0567	0.02396	11.0089	0.2049	39.6909	0.06205	38	0.277365	152.652	16.6079	189.298	68.5459	675.078	815.384	22.6125
A-64	11741	436.813	58.8518	0.171063	2.52127	0.1353	3.9642	1.269	6.8066	0.06808	5.5	0.582406	817.819	30.4478	832.128	38.6589	870.532	114.644	93.9447
A-65	31895.9	697.098	80.0911	0.113027	3.01557	0.117	3.42849	0.8423	7.68076	0.05224	6.9	0.446374	713.065	23.1438	620.407	35.6563	295.424	156.879	241.37
A-66	5708.31	395.189	45.6695	0.138052	1.51182	0.1165	4.76223	1.025	7.85963	0.06384	6.3	0.605911	710.112	32.0212	716.274	40.3895	735.628	132.377	96.5315
A-67	8628.49	495.975	55.3164	0.139756	1.35151	0.1128	3.94823	0.9271	5.72821	0.05962	4.2	0.689261	689.018	25.8006	666.086	27.9809	589.24	90.0169	116.933
A-68	26325.3	588.733	59.778	0.15377	1.73999	0.103	3.30538	0.8003	4.79304	0.05638	3.5	0.68962	631.912	19.896	597.024	21.6353	466.615	76.8749	135.425
A-69	16974.1	681.916	55.629	0.0230882	2.76108	0.08304	3.60864	0.5994	15.9754	0.05237	16	0.225888	514.241	17.8362	476.842	60.7901	300.735	354.877	170.995
A-70	23074.8	234.891	66.1792	0.437813	1.31977	0.2761	4.28023	3.652	16.3566	0.09595	16	0.261682	1571.9	59.7062	1560.97	130.382	1546.21	296.651	101.662
A-71	111275	917.889	218.845	0.193556	2.42466	0.221	3.67734	4.981	4.46364	0.1636	2.5	0.823843	1286.9	42.8995	1816.15	37.7456	2492.26	42.6214	51.636
A-72	67958.6	1408.77	195.468	0.300341	7.59093	0.1295	3.13224	2.76	5.40837	0.1546	4.4	0.579148	785.102	23.1528	1344.92	40.3123	2397.25	74.9927	32.75
A-73	155669	352.53	170.659	0.438074	2.83194	0.4529	3.17934	9.483	4.00565	0.1519	2.4	0.793714	2408.03	63.8861	2385.89	36.7928	2367.04	41.5736	101.732
A-74	14861	36.3806	20.6146	0.331921	2.07209	0.5173	4.21325	13	6.76637	0.1822	5.3	0.622675	2687.84	92.6024	2679.3	63.7954	2672.86	87.6412	100.561
A-75	12260.1	32.9241	6.43768	0.330141	2.20927	0.18	10.52	4.266	12.6436	0.1719	7	0.832042	1066.91	103.442	1686.77	104	2576.13	117.177	41.4151
A-76	391615	1233.08	659.323	0.13563	1.98882	0.4669	3.30746	15.42	4.49657	0.2396	3	0.735551	2470.05	67.8657	2841.44	42.8765	3116.58	48.4944	79.2551
a within-run background-corrected mean 207Pb signal in counts per second
b U and Pb content and Th/U ratio were calculated relative to GJ-1 and are accurate to approximately 10%.
c corrected for background, mass bias, laser induced U-Pb fractionation and common Pb (if detectable, see analytical method) using
Stacey & Kramers (1975) model Pb composition. 207Pb/235U calculated using 207Pb/206Pb/(238U/206Pb × 1/137.88). Errors are
propagated by quadratic addition of within-run errors (2SE) and the reproducibility of GJ-1 (2SD).
d Rho is the error correlation defined as err206Pb/238U/err207Pb/235U.
