# Supplementary material for: A tectonic carpet of Variscan flysch at the base of a rootless accretionary prism in northwestern Iberia: U–Pb zircon age constrains from sediments and volcanic olistoliths
Source: Copernicus journal article supplement (doi:10.5194/se-12-835-2021), 2021-04-15
Supplement: Supplementary file 2 [file se-12-835-2021-supplement.zip]

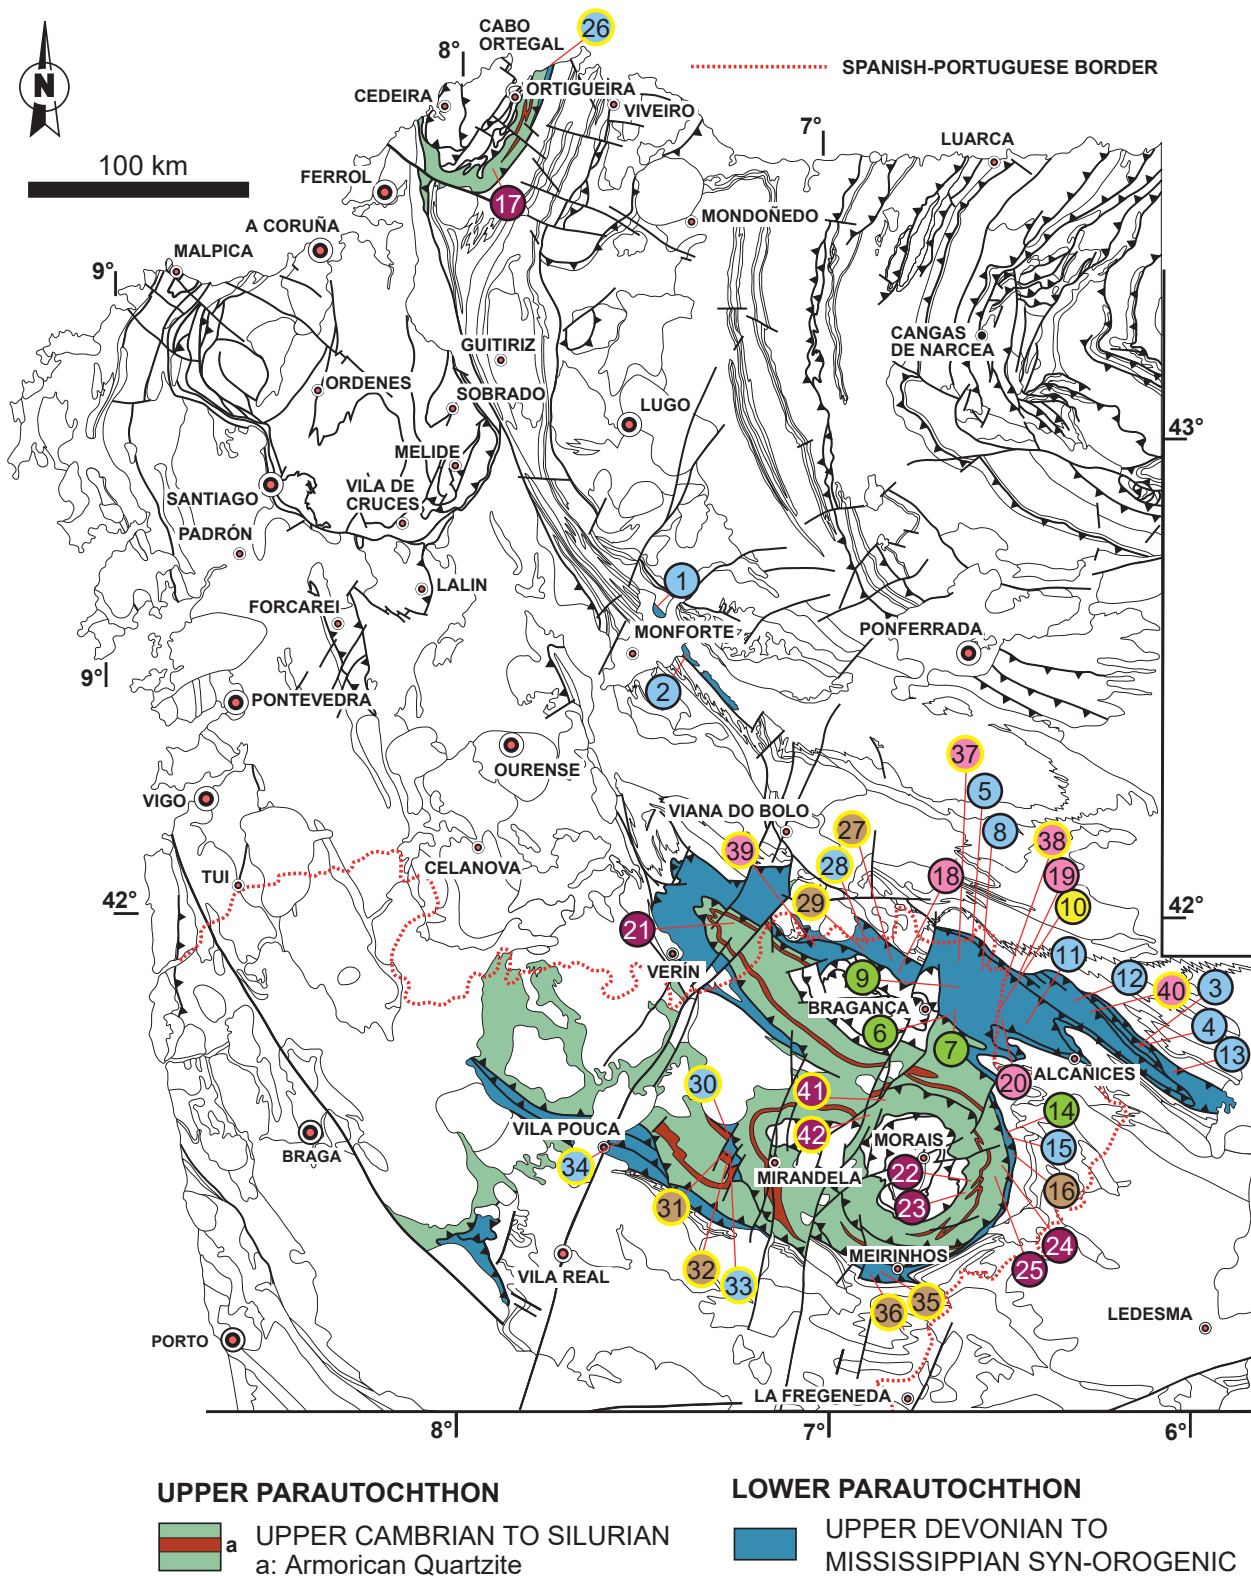

## Samples used for U-Pb zircon geochronology

⑭ Sample location

## Siliciclastic rocks

- With Variscan detrital zircons (MDA\* and/or YZ\* with 400-320 Ma)
- Without Variscan detrital zircons (MDA and/or YZ older than 400 Ma)
- Armorican Quartzite olistolith within the LPa
- Pre-Variscan siliciclastic olistolith

\*MDA - Maximum depositional age; YZ - Youngest single zircon age

## Volcanic rocks

- Felsic volcanic olistoliths from the LPa
- Rhyolites and dacites from the UPa

## Other works

*Martínez Catalán et al., 2004*

- ① SO-1
- ② SO-2

*Martínez Catalán et al., 2008*

- ③ SO-4
- ④ SO-5
- ⑤ SO-6
- ⑥ SO-7

*Martínez Catalán et al., 2016*

- ⑦ SO-8
- ⑧ SO-9
- ⑨ SO-10
- ⑩ SO-11
- ⑪ SO-12
- ⑫ SO-13
- ⑬ SO-14

*Dias da Silva et al., 2015*

- ⑭ VC-45ZIR
- ⑮ VC-21ZIR
- ⑯ VC-57ZIR

*Valverde Vaquero et al., 2004*

- ⑰ QUEIROGA

*Farias et al., 2014*

- ⑱ COS-7
- ⑲ COS-8

*González Clavijo et al., 2016*

- ⑳ NUEZ

*Valverde Vaquero et al., 2007*

- ㉑ NAVALLO

*Dias da Silva et al., 2016*

- ㉒ PR-2
- ㉓ PR-1

*Dias da Silva et al., 2014*

- ㉔ MOR-18ZIR
- ㉕ SAL-1ZIR

## This work

- ㉖ PICON-2
- ㉗ EC-PO-293
- ㉘ GIM-ZR-01
- ㉙ AD-PO-66
- ㉚ AD-PO-57
- ㉛ AD-PO-55
- ㉜ AD-PO-49
- ㉝ MIR-41
- ㉞ AD-PO-48B
- ㉟ MEI-ZR-01
- ㊱ CR-ZR-01
- ㊲ EC-PO-337
- ㊳ PET-1
- ㊴ EC-PO-419
- ㊵ RAB-1
- ㊶ P-385
- ㊷ P-381
