# Supplementary material for: A tectonic carpet of Variscan flysch at the base of a rootless accretionary prism in northwestern Iberia: U–Pb zircon age constrains from sediments and volcanic olistoliths
Source: Copernicus journal article supplement (doi:10.5194/se-12-835-2021), 2021-04-15
Supplement: Supplementary file 2 [file Supplementary Table 11_PICON2.xls]

## Sheet: PlotDat1
Source sheet	all data	0.41274	0.0557456	340		345		350		355		360		365		370		0.392198	0.0535	0.392997	0.0535	0.397729	0.0541582	0.428596	0.0566344	0.440258	0.0575408	0.434106	0.0578873	0.443574	0.0579914	0.443908	0.0582893	0.429574	0.0572436
Plot name	Concordia0	0.420685	0.0565749	0.398508	0.0541582	0.405423	0.0549761	0.412373	0.0557947	0.419356	0.0566139	0.426375	0.0574338	0.433427	0.0582543	0.440515	0.0590754	0.392198	0.0535	0.39393	0.0536109	0.404629	0.0549761	0.42828	0.0568224	0.43987	0.0577689	0.433807	0.0580603	0.443196	0.0582085	0.443567	0.0584911	0.429389	0.0573537
Plot Type	1	0.419288	0.056792	0.398493	0.0541724	0.405408	0.0549905	0.412357	0.0558093	0.419341	0.0566288	0.426358	0.0574489	0.433411	0.0582696	0.440498	0.0590909	0.39393	0.0537063	0.395664	0.0538169	0.411563	0.0557947	0.427367	0.056969	0.438744	0.0579511	0.43295	0.0581845	0.442095	0.0583865	0.442579	0.0586499	0.428854	0.0574394
1st free col	37	0.424395	0.0571906	0.398449	0.054186	0.405363	0.0550044	0.412311	0.0558234	0.419294	0.0566431	0.426311	0.0574634	0.433362	0.0582843	0.440449	0.0591058	0.395664	0.0539127	0.397401	0.054023	0.418531	0.0566139	0.425891	0.0570686	0.436925	0.0580805	0.431568	0.0582552	0.440314	0.0585186	0.440984	0.0587595	0.427989	0.0574975
Sigma Level	2	0.426754	0.0573704	0.398377	0.0541986	0.40529	0.0550172	0.412236	0.0558364	0.419217	0.0566562	0.426233	0.0574767	0.433283	0.0582979	0.440368	0.0591196	0.397401	0.0541191	0.399139	0.054229	0.425533	0.0574338	0.423911	0.0571174	0.434481	0.058152	0.429714	0.0582696	0.437922	0.0585996	0.438841	0.0588157	0.426828	0.0575256
Absolute Errs	FALSE	IsoLine	IsoLine	0.39828	0.0542096	0.405191	0.0550284	0.412136	0.0558478	0.419115	0.0566678	0.426128	0.0574885	0.433176	0.0583097	0.440259	0.0591317	0.399139	0.0543256	0.40088	0.0544352	0.43257	0.0582543	0.4215	0.0571134	0.431508	0.0581629	0.427459	0.0582273	0.435009	0.0586265	0.436234	0.0588163	0.425416	0.0575227
Symbol Type	1			0.398162	0.0542187	0.40507	0.0550376	0.412013	0.0558571	0.41899	0.0566773	0.426001	0.0574981	0.433047	0.0583195	0.440127	0.0591416	0.40088	0.0545321	0.402622	0.0546413	0.439642	0.0590754	0.418754	0.0570569	0.428118	0.0581127	0.424891	0.0581298	0.431688	0.0585982	0.433263	0.0587614	0.423806	0.0574889
Inverse Plot	FALSE			0.398027	0.0542254	0.404933	0.0550444	0.411873	0.055864	0.418847	0.0566843	0.425855	0.0575052	0.432898	0.0583268	0.439976	0.0591489	0.402622	0.0547386	0.404367	0.0548475	IsoLine	IsoLine	0.415776	0.05695	0.424442	0.0580035	0.422107	0.0579809	0.428088	0.0585158	0.430041	0.0586531	0.422061	0.0574255
Color Plot	TRUE			0.397881	0.0542296	0.404784	0.0550486	0.411721	0.0558683	0.418692	0.0566886	0.425697	0.0575096	0.432738	0.0583312	0.439812	0.0591535	0.404367	0.0549452	0.406115	0.0550537			0.412681	0.0567969	0.420623	0.0578393	0.419215	0.0577863	0.424345	0.0583824	0.426694	0.0584954	0.420248	0.057335
3D plot	FALSE			0.397729	0.054231	0.404629	0.0550501	0.411563	0.0558698	0.418531	0.0566901	0.425533	0.0575111	0.43257	0.0583327	0.439642	0.059155	0.406115	0.0551518	0.407864	0.05526			0.409589	0.0566033	0.416805	0.0576266	0.416325	0.0575535	0.420604	0.0582033	0.423348	0.0582945	0.418436	0.0572207
Linear	FALSE			0.397577	0.0542296	0.404474	0.0550486	0.411405	0.0558683	0.41837	0.0566886	0.425369	0.0575096	0.432403	0.0583312	0.439472	0.0591535	0.407864	0.0553584	0.409615	0.0554663			0.406618	0.0563768	0.413137	0.0573734	0.41355	0.0572914	0.417009	0.0579853	0.420134	0.0580581	0.416695	0.0570872
Data Range	AC3:AG7			0.397431	0.0542254	0.404325	0.0550444	0.411253	0.055864	0.418215	0.0566843	0.425211	0.0575052	0.432242	0.0583268	0.439308	0.0591489	0.409615	0.0555651	0.411369	0.0556727			0.403882	0.056126	0.409759	0.0570896	0.410995	0.0570102	0.413698	0.0577367	0.417173	0.0577953	0.415092	0.0569395
Filled Symbols	TRUE			0.397297	0.0542187	0.404188	0.0550376	0.411113	0.0558571	0.418072	0.0566773	0.425066	0.0574981	0.432094	0.0583195	0.439157	0.0591416	0.411369	0.0557719	0.413125	0.0558791			0.401486	0.0558606	0.406801	0.056786	0.408759	0.0567205	0.410797	0.0574671	0.414581	0.0575161	0.413688	0.0567834
ConcAge	TRUE			0.397178	0.0542096	0.404067	0.0550284	0.41099	0.0558478	0.417947	0.0566678	0.424938	0.0574885	0.431964	0.0583097	0.439025	0.0591317	0.413125	0.0559786	0.414883	0.0560855			0.399523	0.0555907	0.404376	0.0564742	0.406927	0.0564336	0.40842	0.057187	0.412457	0.0572314	0.412538	0.0566247
ConcSwap	FALSE			0.397082	0.0541986	0.403969	0.0550172	0.410889	0.0558364	0.417845	0.0566562	0.424834	0.0574767	0.431858	0.0582979	0.438916	0.0591196	0.414883	0.0561854	0.416643	0.056292			0.398068	0.0553269	0.402578	0.0561664	0.405571	0.0561605	0.406656	0.0569069	0.410882	0.056952	0.411685	0.0564697
1st Symbol-row	1			0.39701	0.054186	0.403895	0.0550044	0.410815	0.0558234	0.417768	0.0566431	0.424756	0.0574634	0.431778	0.0582843	0.438835	0.0591058	0.416643	0.0563923	0.418405	0.0564985			0.397177	0.0550791	0.401476	0.0558742	0.404741	0.0559116	0.405574	0.0566378	0.409918	0.0566887	0.411163	0.0563242
				0.396965	0.0541724	0.40385	0.0549905	0.410769	0.0558093	0.417721	0.0566288	0.424708	0.0574489	0.43173	0.0582696	0.438786	0.0590909	0.418405	0.0565992	0.42017	0.0567051			0.396884	0.0548569	0.401112	0.0556089	0.404471	0.0556966	0.405215	0.0563899	0.4096	0.0564515	0.410991	0.0561939
				0.39695	0.0541582	0.403835	0.0549761	0.410753	0.0557947	0.417705	0.0566139	0.424692	0.0574338	0.431713	0.0582543	0.438769	0.0590754	0.42017	0.0568061	0.421937	0.0569117			0.3972	0.0546689	0.4015	0.0553808	0.40477	0.0555237	0.405593	0.0561727	0.409941	0.0562497	0.411177	0.0560837
				0.396965	0.054144	0.40385	0.0549617	0.410769	0.0557801	0.417721	0.056599	0.424708	0.0574187	0.43173	0.058239	0.438786	0.0590599	0.421937	0.0570131	0.423706	0.0571183			0.398113	0.0545223	0.402626	0.0551986	0.405627	0.0553995	0.406694	0.0559947	0.410929	0.056091	0.411712	0.055998
				0.39701	0.0541303	0.403895	0.0549478	0.410815	0.055766	0.417768	0.0565848	0.424756	0.0574042	0.431778	0.0582242	0.438835	0.0590449	0.423706	0.0572201	0.425477	0.057325			0.399589	0.0544227	0.404445	0.0550692	0.407009	0.0553288	0.408475	0.0558627	0.412524	0.0559814	0.412576	0.05594
				0.397082	0.0541177	0.403969	0.054935	0.410889	0.055753	0.417845	0.0565716	0.424834	0.0573908	0.431858	0.0582107	0.438916	0.0590312	0.425477	0.0574272	0.42725	0.0575317			0.40157	0.0543739	0.406889	0.0549977	0.408863	0.0553143	0.410868	0.0557817	0.414667	0.0559252	0.413737	0.0559119
				0.397178	0.0541067	0.404067	0.0549238	0.41099	0.0557416	0.417947	0.05656	0.424938	0.0573791	0.431964	0.0581988	0.439025	0.0590191	0.42725	0.0576343	0.429026	0.0577385			0.40398	0.0543778	0.409863	0.0549868	0.411117	0.0553567	0.41378	0.0557548	0.417274	0.0559245	0.41515	0.0559148
				0.397297	0.0540976	0.404188	0.0549146	0.411113	0.0557323	0.418072	0.0565506	0.425066	0.0573695	0.432094	0.058189	0.439157	0.0590092	0.429026	0.0578414	0.430804	0.0579453			0.406727	0.0544343	0.413252	0.055037	0.413686	0.0554542	0.417101	0.0557831	0.420245	0.0559794	0.416759	0.0559485
				0.397431	0.0540909	0.404325	0.0549078	0.411253	0.0557253	0.418215	0.0565435	0.425211	0.0573623	0.432242	0.0581818	0.439308	0.0590018	0.430804	0.0580486	0.432584	0.0581521			0.409705	0.0545412	0.416928	0.0551462	0.41647	0.0556031	0.420702	0.0558655	0.423466	0.0560878	0.418504	0.0560119
				0.397577	0.0540868	0.404474	0.0549036	0.411405	0.0557211	0.41837	0.0565392	0.425369	0.0573579	0.432403	0.0581773	0.439472	0.0589973	0.432584	0.0582558	0.434366	0.058359			0.412799	0.0546944	0.420748	0.0553104	0.419362	0.0557977	0.424444	0.0559988	0.426814	0.0562454	0.420318	0.0561025
				0.397729	0.0540854	0.404629	0.0549022	0.411563	0.0557196	0.418531	0.0565377	0.425533	0.0573564	0.43257	0.0581758	0.439642	0.0589958	0.434366	0.0584631	0.43615	0.0585659			0.415891	0.054888	0.424565	0.0555231	0.422251	0.0560305	0.428185	0.0561779	0.43016	0.0564463	0.42213	0.0562167
				0.397881	0.0540868	0.404784	0.0549036	0.411721	0.0557211	0.418692	0.0565392	0.425697	0.0573579	0.432738	0.0581773	0.439812	0.0589973	0.43615	0.0586704	0.437937	0.0587729			0.418862	0.0551145	0.428233	0.0557763	0.425027	0.0562925	0.43178	0.056396	0.433374	0.0566827	0.423871	0.0563502
				0.398027	0.0540909	0.404933	0.0549078	0.411873	0.0557253	0.418847	0.0565435	0.425855	0.0573623	0.432898	0.0581818	0.439976	0.0590018	0.437937	0.0588777	0.439726	0.0589799			0.421598	0.0553653	0.431611	0.0560601	0.427582	0.0565738	0.435092	0.0566445	0.436334	0.0569455	0.425474	0.0564979
				0.398162	0.0540976	0.40507	0.0549146	0.412013	0.0557323	0.41899	0.0565506	0.426001	0.0573695	0.433047	0.058189	0.440127	0.0590092	0.439726	0.0590851	0.441517	0.0591869			0.423994	0.0556307	0.43457	0.0563637	0.429818	0.0568634	0.437992	0.0569141	0.438926	0.0572247	0.426877	0.0566541
				0.39828	0.0541067	0.405191	0.0549238	0.412136	0.0557416	0.419115	0.05656	0.426128	0.0573791	0.433176	0.0581988	0.440259	0.0590191	0.441517	0.0592925	0.44331	0.059394			0.425957	0.0559005	0.436994	0.0566755	0.431649	0.0571503	0.44037	0.0571943	0.441051	0.0575094	0.428028	0.0568127
				0.398377	0.0541177	0.40529	0.054935	0.412236	0.055753	0.419217	0.0565716	0.426233	0.0573908	0.433283	0.0582107	0.440368	0.0590312	0.44331	0.0595	0.444229	0.0595			0.427412	0.0561644	0.438792	0.0569833	0.433006	0.0574234	0.442133	0.0574743	0.442625	0.0577889	0.42888	0.0569678
				0.398449	0.0541303	0.405363	0.0549478	0.412311	0.055766	0.419294	0.0565848	0.426311	0.0574042	0.433362	0.0582242	0.440449	0.0590449	0.44331	0.0595	0.442396	0.0595			0.428303	0.0564122	0.439894	0.0572755	0.433835	0.0576723	0.443216	0.0577435	0.44359	0.0580522	0.429402	0.0571133
				0.398493	0.054144	0.405408	0.0549617	0.412357	0.0557801	0.419341	0.056599	0.426358	0.0574187	0.433411	0.058239	0.440498	0.0590599	IsoLine	IsoLine	0.441517	0.0593981			0.428596	0.0566344	0.440258	0.0575408	0.434106	0.0578873	0.443574	0.0579914	0.443908	0.0582893	0.429574	0.0572436
				0.398508	0.0541582	0.405423	0.0549761	0.412373	0.0557947	0.419356	0.0566139	0.426375	0.0574338	0.433427	0.0582543	0.440515	0.0590754			0.439726	0.0591903			ErrEll	ErrEll	ErrEll	ErrEll	ErrEll	ErrEll	ErrEll	ErrEll	ErrEll	ErrEll	ErrEll	ErrEll
				ConcTikEll	ConcTikEll	ConcTikEll	ConcTikEll	ConcTikEll	ConcTikEll	ConcTikEll	ConcTikEll	ConcTikEll	ConcTikEll	ConcTikEll	ConcTikEll	ConcTikEll	ConcTikEll			0.437937	0.0589826
																				0.43615	0.0587748
																				0.434366	0.0585672
																				0.432584	0.0583595
																				0.430804	0.0581519
																				0.429026	0.0579444
																				0.42725	0.0577368
																				0.425477	0.0575294
																				0.423706	0.0573219
																				0.421937	0.0571145
																				0.42017	0.0569072
																				0.418405	0.0566999
																				0.416643	0.0564926
																				0.414883	0.0562854
																				0.413125	0.0560782
																				0.411369	0.055871
																				0.409615	0.0556639
																				0.407864	0.0554568
																				0.406115	0.0552498
																				0.404367	0.0550428
																				0.402622	0.0548359
																				0.40088	0.0546289
																				0.399139	0.0544221
																				0.397401	0.0542153
																				0.395664	0.0540085
																				0.39393	0.0538017
																				0.392198	0.053595
																				0.391403	0.0535
																				0.392997	0.0535
																				ConcBand	ConcBand

## Sheet: PlotDat0
Source sheet	all data	0.41274	0.0557456	0	0	0.217708	0.0315113	0.428596	0.0566344	0.440258	0.0575408	0.434106	0.0578873	0.443574	0.0579914	0.443908	0.0582893	0.459931	0.0603888	0.46343	0.0608951	0.464938	0.0609787	0.464073	0.0612623	0.468938	0.0615866	0.482546	0.0614907	0.476819	0.0620257	0.489265	0.0628944	0.613402	0.078463	0.621767	0.0763615	0.636324	0.0791256	0.635069	0.0797529	0.68166	0.0828487	0.714742	0.085555	0.705046	0.0866022	0.738416	0.0868763
Plot name	Concordia0	0.420685	0.0565749	0.114182	0.017176	0.482812	0.0640155	0.427937	0.0568945	0.439448	0.0578579	0.433485	0.0581231	0.442783	0.0582947	0.443196	0.058569	0.459223	0.0606376	0.462638	0.0611954	0.464263	0.0612432	0.463425	0.0615009	0.468337	0.0618128	0.481449	0.0618332	0.476019	0.0623346	0.488328	0.0632362	0.611791	0.0787495	0.620689	0.07676	0.635253	0.079525	0.634277	0.0800404	0.680514	0.0832671	0.713324	0.0860125	0.704103	0.0868893	0.736278	0.0875333
Plot Type	1	0.419288	0.056792	0.241401	0.0346471	0.805631	0.097544	0.426047	0.0570616	0.437117	0.0580711	0.431714	0.058251	0.440503	0.0585086	0.441152	0.0587517	0.457209	0.0607537	0.460379	0.0613627	0.462324	0.0614121	0.461575	0.0616235	0.466622	0.0619378	0.478262	0.0621032	0.473716	0.0625467	0.485618	0.0634869	0.607194	0.0786619	0.617588	0.0770183	0.632174	0.0797895	0.63201	0.0802014	0.677212	0.0835453	0.709209	0.0863598	0.701415	0.0869989	0.730068	0.0880428
1st free col	155	0.424395	0.0571906	0.383147	0.0524182	1.19873	0.132129	0.423079	0.0571221	0.433456	0.058163	0.428936	0.0582607	0.436917	0.0586157	0.437942	0.0588224	0.45405	0.0607278	0.456835	0.0613836	0.45928	0.0614718	0.458676	0.0616202	0.46393	0.0619516	0.473242	0.0622789	0.470097	0.0626449	0.481356	0.0636262	0.599983	0.0782073	0.612715	0.0771154	0.627334	0.0798975	0.628452	0.0802229	0.672023	0.0836606	0.702731	0.0865687	0.697198	0.086922	0.72029	0.0883635
Sigma Level	2	0.426754	0.0573704	0.541077	0.0704946	1.67741	0.167804	0.419273	0.0570711	0.428759	0.0581263	0.425377	0.0581515	0.432317	0.0586074	0.433825	0.0587755	0.450004	0.0605618	0.452293	0.0612562	0.455377	0.0614173	0.45496	0.0614912	0.460481	0.0618529	0.466798	0.0623459	0.465454	0.0626212	0.475885	0.0636426	0.590743	0.0774225	0.606465	0.0770435	0.621127	0.0798403	0.623891	0.0801033	0.665367	0.0836037	0.694416	0.0866223	0.691793	0.0866648	0.707735	0.0884695
Absolute Errs	FALSE	0.443088	0.0589995	0.717041	0.0888814	2.2603	0.204603	0.414938	0.0569126	0.423409	0.0579639	0.421324	0.0579321	0.427075	0.0584843	0.429136	0.0586147	0.445397	0.0602692	0.447121	0.0609909	0.450932	0.0612532	0.45073	0.0612471	0.456553	0.0616498	0.45945	0.0622989	0.460163	0.0624776	0.469651	0.0635351	0.58022	0.0763712	0.599345	0.0768084	0.614055	0.0796226	0.618696	0.0798522	0.657783	0.0833793	0.684936	0.0865162	0.68564	0.0862482	0.693421	0.0883521
Symbol Type	1	0.444518	0.0595542	0.913096	0.107584	2.97009	0.242562	0.410425	0.0566597	0.417838	0.057689	0.417107	0.0576203	0.421616	0.0582564	0.424253	0.0583532	0.440603	0.0598738	0.441738	0.0606093	0.446303	0.0609926	0.446327	0.0609075	0.452466	0.0613588	0.451795	0.0621416	0.454654	0.0622256	0.463156	0.0633121	0.56927	0.0751384	0.591931	0.0764292	0.60669	0.079262	0.613289	0.0794899	0.649885	0.0830055	0.675059	0.0862592	0.679236	0.085706	0.678507	0.0880208
Inverse Plot	FALSE	0.448677	0.0600632	1.13154	0.126608	3.83441	0.281716	0.4061	0.0563327	0.412497	0.0573238	0.413066	0.0572414	0.416382	0.0579421	0.419573	0.058012	0.43601	0.0594075	0.436581	0.0601421	0.441867	0.0606567	0.44211	0.0605001	0.448549	0.0610034	0.444451	0.0618869	0.449373	0.0618857	0.456929	0.0629919	0.558777	0.0738241	0.584825	0.0759366	0.59963	0.0787877	0.608107	0.0790457	0.642313	0.0825126	0.665587	0.0858719	0.673101	0.0850821	0.664202	0.0875025
Color Plot	FALSE	0.448606	0.0600694	1.37492	0.145959	4.8869	0.322105	0.402312	0.0559581	0.40782	0.056898	0.409529	0.0568261	0.411797	0.057567	0.415475	0.0576189	0.431991	0.0589082	0.432066	0.0596274	0.437983	0.0602728	0.438418	0.0600577	0.445121	0.0606124	0.438015	0.0615553	0.444747	0.0614855	0.451473	0.0626003	0.549593	0.0725347	0.5786	0.0753704	0.593447	0.0782382	0.603571	0.0785558	0.635681	0.0819406	0.657285	0.0853858	0.66773	0.084427	0.651664	0.0868392
3D plot	FALSE	0.454576	0.060564	1.64609	0.165642	6.16853	0.363766	0.399369	0.0555663	0.404185	0.0564459	0.406783	0.0564081	0.408233	0.0571613	0.41229	0.0572056	0.42887	0.0584163	0.42856	0.0591067	0.434964	0.0598718	0.435552	0.0596164	0.442458	0.0602174	0.433008	0.0611737	0.441151	0.0610573	0.44723	0.0621691	0.542462	0.0713747	0.573763	0.0747766	0.588641	0.0776579	0.600047	0.0780597	0.630526	0.0813357	0.650827	0.0848403	0.66356	0.0837937	0.641909	0.0860847
Linear	FALSE	0.455649	0.0609382	1.94823	0.185663	7.72917	0.40674	0.39751	0.0551891	0.401887	0.0560043	0.40505	0.0560211	0.405978	0.0567581	0.410278	0.0568057	0.426902	0.0579717	0.426347	0.0586222	0.433057	0.0594864	0.433744	0.0592117	0.440778	0.0598506	0.429834	0.060773	0.438877	0.0606358	0.444544	0.0617332	0.53796	0.0704381	0.570704	0.0742033	0.585602	0.0770939	0.597822	0.0775977	0.627266	0.080747	0.646736	0.0842795	0.660928	0.0832337	0.635728	0.0852999
Data Range	AC3:AG75	0.457464	0.0611405	2.28486	0.206028	9.62957	0.451068	0.396884	0.0548569	0.401112	0.0556089	0.404471	0.0556966	0.405215	0.0563899	0.4096	0.0564515	0.426245	0.0576103	0.425606	0.0582133	0.432416	0.0591477	0.433139	0.0588765	0.440215	0.0595415	0.428752	0.0603858	0.438109	0.0602552	0.443633	0.0613279	0.536454	0.0698007	0.569672	0.0736969	0.584576	0.0765918	0.597075	0.0772071	0.626164	0.0802221	0.645343	0.0837488	0.660048	0.0827923	0.633622	0.0845486
Filled Symbols	FALSE	0.466449	0.0621112	2.65994	0.226743	11.9437	0.496793	0.397543	0.0545968	0.401922	0.0552918	0.405092	0.0554609	0.406006	0.0560865	0.410312	0.0561718	0.426952	0.0573615	0.426398	0.057913	0.433091	0.0588832	0.433788	0.0586379	0.440816	0.0593153	0.429849	0.0600432	0.438909	0.0599463	0.44457	0.0609861	0.538064	0.0695142	0.570751	0.0732984	0.585647	0.0761924	0.597867	0.0769197	0.62731	0.0798037	0.646762	0.0832913	0.66099	0.0825051	0.63576	0.0838915
ConcAge	FALSE	0.574928	0.0741318	3.07783	0.247813	14.7617	0.543959	0.399433	0.0544297	0.404253	0.0550786	0.406863	0.0553329	0.408287	0.0558726	0.412355	0.0559892	0.428967	0.0572453	0.428657	0.0577457	0.43503	0.0587142	0.435637	0.0585153	0.442531	0.0591903	0.433036	0.0597732	0.441212	0.0597342	0.447279	0.0607354	0.542661	0.0696018	0.573852	0.0730401	0.588726	0.0759279	0.600134	0.0767586	0.630612	0.0795255	0.650876	0.0829441	0.663678	0.0823956	0.641969	0.083382
ConcSwap	FALSE	0.59572	0.0750292	3.54345	0.269246	18.1931	0.592611	0.402401	0.0543692	0.407915	0.0549867	0.409641	0.0553232	0.411872	0.0557655	0.415566	0.0559185	0.432126	0.0572713	0.432201	0.0577248	0.438074	0.0586546	0.438537	0.0585187	0.445223	0.0591765	0.438055	0.0595976	0.444831	0.059636	0.451542	0.0605962	0.549872	0.0700564	0.578724	0.072943	0.593566	0.0758199	0.603693	0.0767371	0.635801	0.0794102	0.657354	0.0827352	0.667896	0.0824725	0.651748	0.0830613
1st Symbol-row	1	0.61045	0.0778587	4.06223	0.291046	IsoLine	IsoLine	0.406207	0.0544202	0.412611	0.0550234	0.4132	0.0554325	0.416472	0.0557739	0.419683	0.0559654	0.436172	0.0574373	0.436743	0.0578522	0.441977	0.0587091	0.442252	0.0586476	0.448672	0.0592752	0.4445	0.0595306	0.449475	0.0596597	0.457012	0.0605797	0.559113	0.0708411	0.584974	0.0730149	0.599773	0.0758771	0.608254	0.0768567	0.642457	0.0794671	0.66567	0.0826816	0.6733	0.0827297	0.664303	0.0829554
		0.616072	0.07848	4.64024	0.313221			0.410542	0.0545786	0.417961	0.0551858	0.417252	0.0556519	0.421714	0.055897	0.424372	0.0561261	0.440779	0.0577299	0.441915	0.0581175	0.446422	0.0588732	0.446483	0.0588917	0.4526	0.0594783	0.451847	0.0595776	0.454765	0.0598033	0.463247	0.0606873	0.569635	0.0718925	0.592094	0.07325	0.606845	0.0760948	0.613448	0.0771079	0.650041	0.0796915	0.67515	0.0827876	0.679453	0.0831462	0.678617	0.0830728
		0.653912	0.0815354	5.28426	0.335777			0.415055	0.0548316	0.423532	0.0554607	0.42147	0.0559637	0.427173	0.0561249	0.429255	0.0563877	0.445573	0.0581253	0.447298	0.0584991	0.451051	0.0591338	0.450885	0.0592313	0.456687	0.0597693	0.459503	0.0597349	0.460274	0.0600553	0.469741	0.0609102	0.580586	0.0731253	0.599508	0.0736292	0.61421	0.0764554	0.618856	0.0774702	0.657939	0.0800653	0.685026	0.0830446	0.685857	0.0836884	0.693531	0.083404
		0.680043	0.0846519	6.00181	0.358721			0.419381	0.0551586	0.428873	0.0558259	0.425511	0.0563425	0.432407	0.0564391	0.433935	0.0567288	0.450166	0.0585916	0.452455	0.0589663	0.455487	0.0594697	0.455103	0.0596387	0.460604	0.0601247	0.466846	0.0599896	0.465555	0.0603952	0.475968	0.0612304	0.591078	0.0744396	0.606615	0.0741219	0.62127	0.0769297	0.624037	0.0779143	0.665511	0.0805582	0.694499	0.0834319	0.691993	0.0843124	0.707836	0.0839223
		0.682547	0.0846972	6.80129	0.382058			0.423168	0.0555332	0.43355	0.0562518	0.429047	0.0567578	0.436992	0.0568143	0.438033	0.057122	0.454185	0.0590909	0.45697	0.059481	0.459371	0.0598536	0.458794	0.0600811	0.464032	0.0605157	0.473283	0.0603212	0.470181	0.0607955	0.481424	0.061622	0.600262	0.075729	0.612839	0.074688	0.627453	0.0774792	0.628574	0.0784042	0.672143	0.0811302	0.7028	0.083918	0.697363	0.0849675	0.720374	0.0845856
		0.686019	0.0857124	7.69205	0.405796			0.426111	0.0559249	0.437185	0.0567038	0.431793	0.0571759	0.440557	0.0572199	0.441217	0.0575352	0.457305	0.0595828	0.460476	0.0600017	0.46239	0.0602545	0.46166	0.0605225	0.466695	0.0609107	0.47829	0.0607028	0.473777	0.0612237	0.485667	0.0620532	0.607394	0.0768889	0.617677	0.0752818	0.632259	0.0780595	0.632097	0.0789003	0.677298	0.0817351	0.709258	0.0844636	0.701533	0.0856007	0.730128	0.0853402
		0.709822	0.0880528	8.68453	0.429942			0.427971	0.0563022	0.439483	0.0571454	0.433526	0.0575628	0.442812	0.0576232	0.44323	0.0579351	0.459274	0.0600274	0.462689	0.0604862	0.464297	0.06064	0.463469	0.0609271	0.468375	0.0612775	0.481464	0.0611034	0.476051	0.0616451	0.488353	0.0624891	0.611895	0.0778256	0.620735	0.0758551	0.635298	0.0786235	0.634323	0.0793624	0.680558	0.0823238	0.713349	0.0850244	0.704165	0.0861607	0.736309	0.0861249
		0.723282	0.0890583	9.79033	0.454503			0.428596	0.0566344	0.440258	0.0575408	0.434106	0.0578873	0.443574	0.0579914	0.443908	0.0582893	0.459931	0.0603888	0.46343	0.0608951	0.464938	0.0609787	0.464073	0.0612623	0.468938	0.0615866	0.482546	0.0614907	0.476819	0.0620257	0.489265	0.0628944	0.613402	0.078463	0.621767	0.0763615	0.636324	0.0791256	0.635069	0.0797529	0.68166	0.0828487	0.714742	0.085555	0.705046	0.0866022	0.738416	0.0868763
		0.736348	0.0894565	11.0224	0.479486			Black	Black	Black	Black	Black	Black	Black	Black	Black	Black	Black	Black	Black	Black	Black	Black	Black	Black	Black	Black	Black	Black	Black	Black	Black	Black	Black	Black	Black	Black	Black	Black	Black	Black	Black	Black	Black	Black	Black	Black	Black	Black
		0.72769	0.0896498	12.3951	0.504897
		0.727627	0.0900134	13.9246	0.530745
		0.729634	0.090135	15.6287	0.557038
		0.753084	0.0920484	17.5274	0.583781
		0.758748	0.0929588	19.6429	0.610984
		0.769189	0.0939881	22	0.638655
		0.777156	0.0948565	22	0.638655
		0.796532	0.0966945	IsoLine	IsoLine
		0.857766	0.101226
		0.85721	0.101239
		0.856252	0.101944
		0.937254	0.108732
		0.964057	0.111499
		1.01806	0.115568
		1.01861	0.117701
		1.07434	0.12126
		1.33042	0.139708
		1.42065	0.146255
		1.77925	0.169345
		1.97743	0.184045
		2.17563	0.199238
		3.39661	0.267355
		3.54772	0.270279
		3.57852	0.271113
		3.55183	0.264496
		4.96881	0.311901
		5.84106	0.353381
		6.45316	0.372756
		5.89579	0.340217
		6.49763	0.372505
		6.3778	0.365556
		6.48307	0.369358
		7.37617	0.415168
		7.00459	0.391399
		6.4722	0.359364
		7.29602	0.402598
		7.09516	0.388461
		6.68893	0.365958
		7.10768	0.38863
		7.42319	0.401855
		7.13102	0.380185
		10.1212	0.461899
		11.7804	0.493726
		11.5787	0.480741
		12.481	0.505523
		12.5464	0.506598
		13.2402	0.525919
		16.1546	0.55507
		16.3683	0.560713
		IsoLine	IsoLine
[truncated: 104 more columns]

## Sheet: PlotDat2
Source sheet	all data	0.41274	0.0557456	0.3	0.042188	0.343738	0.0476374	0.428596	0.0566344	0.440258	0.0575408	0.434106	0.0578873	0.443574	0.0579914	0.443908	0.0582893	0.459931	0.0603888	0.46343	0.0608951	0.464938	0.0609787	0.464073	0.0612623	0.468938	0.0615866	0.482546	0.0614907	0.476819	0.0620257	0.489265	0.0628944	0.613402	0.078463	0.621767	0.0763615	0.636324	0.0791256	0.635069	0.0797529	0.68166	0.0828487	0.714742	0.085555	0.705046	0.0866022	0.738416	0.0868763
Plot name	Concordia1	0.420685	0.0565749	0.307722	0.0431638	0.411563	0.0557947	0.427937	0.0568945	0.439448	0.0578579	0.433485	0.0581231	0.442783	0.0582947	0.443196	0.058569	0.459223	0.0606376	0.462638	0.0611954	0.464263	0.0612432	0.463425	0.0615009	0.468337	0.0618128	0.481449	0.0618332	0.476019	0.0623346	0.488328	0.0632362	0.612523	0.0787092	0.621181	0.0766663	0.635742	0.0794306	0.634277	0.0800404	0.681037	0.083168	0.713974	0.0858999	0.704103	0.0868893	0.737259	0.0873705
Plot Type	1	0.419288	0.056792	0.325608	0.0453982	0.482812	0.0640155	0.426047	0.0570616	0.437117	0.0580711	0.431714	0.058251	0.440503	0.0585086	0.441152	0.0587517	0.457209	0.0607537	0.460379	0.0613627	0.462324	0.0614121	0.461575	0.0616235	0.466622	0.0619378	0.478262	0.0621032	0.473716	0.0625467	0.485618	0.0634869	0.61	0.0787554	0.619482	0.0768996	0.634055	0.0796668	0.63201	0.0802014	0.679229	0.083416	0.711724	0.0861902	0.701415	0.0869989	0.733863	0.0877923
1st free col	209	0.424395	0.0571906	0.343738	0.0476374	0.557657	0.0723004	0.423079	0.0571221	0.433456	0.058163	0.428936	0.0582607	0.436917	0.0586157	0.437942	0.0588224	0.45405	0.0607278	0.456835	0.0613836	0.45928	0.0614718	0.458676	0.0616202	0.46393	0.0619516	0.473242	0.0622789	0.470097	0.0626449	0.481356	0.0636262	0.605945	0.0785996	0.616744	0.0770511	0.631336	0.0798241	0.628452	0.0802229	0.676314	0.0835819	0.708088	0.0864133	0.697198	0.086922	0.728376	0.0881231
Sigma Level	2	0.426754	0.0573704	0.362116	0.0498813	0.636279	0.0806498	0.419273	0.0570711	0.428759	0.0581263	0.425377	0.0581515	0.432317	0.0586074	0.433825	0.0587755	0.450004	0.0605618	0.452293	0.0612562	0.455377	0.0614173	0.45496	0.0614912	0.460481	0.0618529	0.466798	0.0623459	0.465454	0.0626212	0.475885	0.0636426	0.600535	0.0782484	0.613088	0.0771142	0.627705	0.0798954	0.623891	0.0801033	0.67242	0.0836582	0.703227	0.0865594	0.691793	0.0866648	0.721038	0.0883486
Absolute Errs	FALSE	0.443088	0.0589995	0.380745	0.0521301	0.718871	0.0890642	0.414938	0.0569126	0.423409	0.0579639	0.421324	0.0579321	0.427075	0.0584843	0.429136	0.0586147	0.445397	0.0602692	0.447121	0.0609909	0.450932	0.0612532	0.45073	0.0612471	0.456553	0.0616498	0.45945	0.0622989	0.460163	0.0624776	0.469651	0.0635351	0.594005	0.0777174	0.608672	0.0770862	0.623319	0.0798777	0.618696	0.0798522	0.667717	0.0836418	0.697353	0.0866222	0.68564	0.0862482	0.712169	0.0884589
Symbol Type	1	0.444518	0.0595542	0.399629	0.0543837	0.805631	0.097544	0.410425	0.0566597	0.417838	0.057689	0.417107	0.0576203	0.421616	0.0582564	0.424253	0.0583532	0.440603	0.0598738	0.441738	0.0606093	0.446303	0.0609926	0.446327	0.0609075	0.452466	0.0613588	0.451795	0.0621416	0.454654	0.0622256	0.463156	0.0633121	0.586641	0.0770296	0.603691	0.0769683	0.618371	0.0797718	0.613289	0.0794899	0.662411	0.0835334	0.690722	0.0865988	0.679236	0.085706	0.702158	0.0884492
Inverse Plot	FALSE	0.448677	0.0600632	0.418772	0.0566422	0.89677	0.10609	0.4061	0.0563327	0.412497	0.0573238	0.413066	0.0572414	0.416382	0.0579421	0.419573	0.058012	0.43601	0.0594075	0.436581	0.0601421	0.441867	0.0606567	0.44211	0.0605001	0.448549	0.0610034	0.444451	0.0618869	0.449373	0.0618857	0.456929	0.0629919	0.578766	0.0762153	0.598361	0.0767656	0.613077	0.0795823	0.608107	0.0790457	0.656734	0.0833376	0.683624	0.0864904	0.673101	0.0850821	0.691441	0.0883198
Color Plot	FALSE	0.448606	0.0600694	0.438176	0.0589054	0.99251	0.114702	0.402312	0.0559581	0.40782	0.056898	0.409529	0.0568261	0.411797	0.057567	0.415475	0.0576189	0.431991	0.0589082	0.432066	0.0596274	0.437983	0.0602728	0.438418	0.0600577	0.445121	0.0606124	0.438015	0.0615553	0.444747	0.0614855	0.451473	0.0626003	0.570723	0.0753098	0.592915	0.0764871	0.607668	0.0793174	0.603571	0.0785558	0.650933	0.083063	0.67637	0.0863016	0.66773	0.084427	0.680487	0.0880765
3D plot	FALSE	0.454576	0.060564	0.457846	0.0611736	IsoLine	IsoLine	0.399369	0.0555663	0.404185	0.0564459	0.406783	0.0564081	0.408233	0.0571613	0.41229	0.0572056	0.42887	0.0584163	0.42856	0.0591067	0.434964	0.0598718	0.435552	0.0596164	0.442458	0.0602174	0.433008	0.0611737	0.441151	0.0610573	0.44723	0.0621691	0.562863	0.0743529	0.587593	0.0761449	0.60238	0.0789888	0.600047	0.0780597	0.645262	0.0827217	0.669277	0.0860407	0.66356	0.0837937	0.669774	0.0877299
Linear	FALSE	0.455649	0.0609382	0.477784	0.0634465			0.39751	0.0551891	0.401887	0.0560043	0.40505	0.0560211	0.405978	0.0567581	0.410278	0.0568057	0.426902	0.0579717	0.426347	0.0586222	0.433057	0.0594864	0.433744	0.0592117	0.440778	0.0598506	0.429834	0.060773	0.438877	0.0606358	0.444544	0.0617332	0.555531	0.0733863	0.582625	0.0757538	0.597445	0.0786108	0.597822	0.0775977	0.639969	0.0823286	0.662654	0.0857191	0.660928	0.0832337	0.659772	0.0872951
Data Range	AC3:AG75	0.457464	0.0611405	0.497996	0.0657244			0.396884	0.0548569	0.401112	0.0556089	0.404471	0.0556966	0.405215	0.0563899	0.4096	0.0564515	0.426245	0.0576103	0.425606	0.0582133	0.432416	0.0591477	0.433139	0.0588765	0.440215	0.0595415	0.428752	0.0603858	0.438109	0.0602552	0.443633	0.0613279	0.549047	0.0724523	0.57823	0.0753312	0.593079	0.0781999	0.597075	0.0772071	0.635286	0.0819007	0.65679	0.0853508	0.660048	0.0827923	0.650917	0.0867911
Filled Symbols	FALSE	0.466449	0.0621112	0.518484	0.0680071			0.397543	0.0545968	0.401922	0.0552918	0.405092	0.0554609	0.406006	0.0560865	0.410312	0.0561718	0.426952	0.0573615	0.426398	0.057913	0.433091	0.0588832	0.433788	0.0586379	0.440816	0.0593153	0.429849	0.0600432	0.438909	0.0599463	0.44457	0.0609861	0.543693	0.0715917	0.574599	0.0748953	0.589472	0.0777742	0.597867	0.0769197	0.631417	0.081457	0.651944	0.0849521	0.66099	0.0825051	0.643596	0.08624
ConcAge	FALSE	0.574928	0.0741318	0.539252	0.0702947			0.399433	0.0544297	0.404253	0.0550786	0.406863	0.0553329	0.408287	0.0558726	0.412355	0.0559892	0.428967	0.0572453	0.428657	0.0577457	0.43503	0.0587142	0.435637	0.0585153	0.442531	0.0591903	0.433036	0.0597732	0.441212	0.0597342	0.447279	0.0607354	0.539705	0.0708421	0.571891	0.0744653	0.586781	0.0773521	0.600134	0.0767586	0.628531	0.0810166	0.648325	0.0845402	0.663678	0.0823956	0.638129	0.0856658
ConcSwap	FALSE	0.59572	0.0750292	0.560304	0.0725872			0.402401	0.0543692	0.407915	0.0549867	0.409641	0.0553232	0.411872	0.0557655	0.415566	0.0559185	0.432126	0.0572713	0.432201	0.0577248	0.438074	0.0586546	0.438537	0.0585187	0.445223	0.0591765	0.438055	0.0595976	0.444831	0.059636	0.451542	0.0605962	0.537256	0.0702363	0.570225	0.0740599	0.585126	0.0769521	0.603693	0.0767371	0.626754	0.0805989	0.646092	0.0841332	0.667896	0.0824725	0.634755	0.0850937
1st Symbol-row	1	0.61045	0.0778587	0.581644	0.0748847			0.406207	0.0544202	0.412611	0.0550234	0.4132	0.0554325	0.416472	0.0557739	0.419683	0.0559654	0.436172	0.0574373	0.436743	0.0578522	0.441977	0.0587091	0.442252	0.0586476	0.448672	0.0592752	0.4445	0.0595306	0.449475	0.0596597	0.457012	0.0605797	0.536454	0.0698007	0.569672	0.0736969	0.584576	0.0765918	0.608254	0.0768567	0.626164	0.0802221	0.645343	0.0837488	0.6733	0.0827297	0.633622	0.0845486
		0.616072	0.07848	0.603276	0.077187			0.410542	0.0545786	0.417961	0.0551858	0.417252	0.0556519	0.421714	0.055897	0.424372	0.0561261	0.440779	0.0577299	0.441915	0.0581175	0.446422	0.0588732	0.446483	0.0588917	0.4526	0.0594783	0.451847	0.0595776	0.454765	0.0598033	0.463247	0.0606873	0.537333	0.0695545	0.570259	0.0733921	0.585158	0.0762868	0.613448	0.0771079	0.626787	0.0799028	0.646111	0.0834039	0.679453	0.0831462	0.634778	0.0840544
		0.653912	0.0815354	0.625203	0.0794943			0.415055	0.0548316	0.423532	0.0554607	0.42147	0.0559637	0.427173	0.0561249	0.429255	0.0563877	0.445573	0.0581253	0.447298	0.0584991	0.451051	0.0591338	0.450885	0.0592313	0.456687	0.0597693	0.459503	0.0597349	0.460274	0.0600553	0.469741	0.0609102	0.539855	0.0695083	0.571958	0.0731589	0.586845	0.0760506	0.618856	0.0774702	0.628595	0.0796548	0.648362	0.0831136	0.685857	0.0836884	0.638174	0.0836326
		0.680043	0.0846519	0.647431	0.0818065			0.419381	0.0551586	0.428873	0.0558259	0.425511	0.0563425	0.432407	0.0564391	0.433935	0.0567288	0.450166	0.0585916	0.452455	0.0589663	0.455487	0.0594697	0.455103	0.0596387	0.460604	0.0601247	0.466846	0.0599896	0.465555	0.0603952	0.475968	0.0612304	0.54391	0.0696641	0.574695	0.0730074	0.589564	0.0758933	0.624037	0.0779143	0.63151	0.079489	0.651997	0.0828905	0.691993	0.0843124	0.643661	0.0833017
		0.682547	0.0846972	0.669963	0.0841237			0.423168	0.0555332	0.43355	0.0562518	0.429047	0.0567578	0.436992	0.0568143	0.438033	0.057122	0.454185	0.0590909	0.45697	0.059481	0.459371	0.0598536	0.458794	0.0600811	0.464032	0.0605157	0.473283	0.0603212	0.470181	0.0607955	0.481424	0.061622	0.549321	0.0700152	0.578352	0.0729442	0.593195	0.075822	0.628574	0.0784042	0.635404	0.0794126	0.656858	0.0827444	0.697363	0.0849675	0.650999	0.0830762
		0.686019	0.0857124	0.692802	0.0864458			0.426111	0.0559249	0.437185	0.0567038	0.431793	0.0571759	0.440557	0.0572199	0.441217	0.0575352	0.457305	0.0595828	0.460476	0.0600017	0.46239	0.0602545	0.46166	0.0605225	0.466695	0.0609107	0.47829	0.0607028	0.473777	0.0612237	0.485667	0.0620532	0.555851	0.0705463	0.582767	0.0729722	0.597581	0.0758397	0.632097	0.0789003	0.640107	0.079429	0.662733	0.0826817	0.701533	0.0856007	0.659868	0.0829659
		0.709822	0.0880528	0.715954	0.0887729			0.427971	0.0563022	0.439483	0.0571454	0.433526	0.0575628	0.442812	0.0576232	0.44323	0.0579351	0.459274	0.0600274	0.462689	0.0604862	0.464297	0.06064	0.463469	0.0609271	0.468375	0.0612775	0.481464	0.0611034	0.476051	0.0616451	0.488353	0.0624891	0.563214	0.071234	0.587749	0.0730901	0.602529	0.0759456	0.634323	0.0793624	0.645413	0.0795374	0.669363	0.082705	0.704165	0.0861607	0.66988	0.0829756
		0.723282	0.0890583	0.739423	0.091105			0.428596	0.0566344	0.440258	0.0575408	0.434106	0.0578873	0.443574	0.0579914	0.443908	0.0582893	0.459931	0.0603888	0.46343	0.0608951	0.464938	0.0609787	0.464073	0.0612623	0.468938	0.0615866	0.482546	0.0614907	0.476819	0.0620257	0.489265	0.0628944	0.57109	0.0720484	0.593079	0.0732928	0.607823	0.0761351	0.635069	0.0797529	0.65109	0.0797332	0.676461	0.0828135	0.705046	0.0866022	0.680597	0.083105
		0.736348	0.0894565	0.763213	0.0934421			Black	Black	Black	Black	Black	Black	Black	Black	Black	Black	Black	Black	Black	Black	Black	Black	Black	Black	Black	Black	Black	Black	Black	Black	Black	Black	0.579133	0.0729539	0.598524	0.0735713	0.613232	0.0764	Black	Black	0.656891	0.0800078	0.683715	0.0830023	Black	Black	0.691551	0.0833483
		0.72769	0.0896498	0.787328	0.0957842																													0.586992	0.0739108	0.603847	0.0739136	0.61852	0.0767286			0.662562	0.0803491	0.690809	0.0832632			0.702263	0.0836949
		0.727627	0.0900134	0.811773	0.0981313																													0.594325	0.0748774	0.608815	0.0743046	0.623455	0.0771066			0.667855	0.0807422	0.697432	0.0835848			0.712265	0.0841297
		0.729634	0.090135	0.836552	0.100483																													0.600809	0.0758114	0.61321	0.0747273	0.627821	0.0775175			0.672538	0.0811701	0.703295	0.083953			0.721121	0.0846337
		0.753084	0.0920484	0.861671	0.102841																													0.606162	0.076672	0.616841	0.0751631	0.631428	0.0779432			0.676407	0.0816139	0.708142	0.0843518			0.728442	0.0851848
		0.758748	0.0929588	0.887132	0.105203																													0.610151	0.0774216	0.619549	0.0755932	0.634119	0.0783653			0.679293	0.0820542	0.711761	0.0847637			0.733909	0.085759
		0.769189	0.0939881	0.912942	0.10757																													0.612599	0.0780274	0.621215	0.0759985	0.635774	0.0787653			0.68107	0.0824719	0.713993	0.0851707			0.737282	0.0863312
		0.777156	0.0948565	0.939105	0.109942																													0.613402	0.078463	0.621767	0.0763615	0.636324	0.0791256			0.68166	0.0828487	0.714742	0.085555			0.738416	0.0868763
		0.796532	0.0966945	0.965626	0.11232																													Black	Black	Black	Black	Black	Black			Black	Black	Black	Black			Black	Black
		0.857766	0.101226	0.99251	0.114702
		0.85721	0.101239	1	0.115359
		0.856252	0.101944	IsoLine	IsoLine
		0.937254	0.108732
		0.964057	0.111499
		1.01806	0.115568
		1.01861	0.117701
		1.07434	0.12126
		1.33042	0.139708
		1.42065	0.146255
		1.77925	0.169345
		1.97743	0.184045
		2.17563	0.199238
		3.39661	0.267355
		3.54772	0.270279
		3.57852	0.271113
		3.55183	0.264496
		4.96881	0.311901
		5.84106	0.353381
		6.45316	0.372756
		5.89579	0.340217
		6.49763	0.372505
		6.3778	0.365556
		6.48307	0.369358
		7.37617	0.415168
		7.00459	0.391399
		6.4722	0.359364
		7.29602	0.402598
		7.09516	0.388461
		6.68893	0.365958
		7.10768	0.38863
		7.42319	0.401855
		7.13102	0.380185
		10.1212	0.461899
		11.7804	0.493726
		11.5787	0.480741
		12.481	0.505523
		12.5464	0.506598
		13.2402	0.525919
		16.1546	0.55507
		16.3683	0.560713
		IsoLine	IsoLine
[truncated: 158 more columns]

## Sheet: data table
PICON-2	207Pb	Ua	Pba	Thc	206Pb	206Pbe	2 s	207Pbe	2 s	207Pbe	2 s	rho	206Pb	2 s	207Pb	2 s	207Pb	2 s
Spot number	(cps)	(ppm)	(ppm)	U	204Pb	238U	%	235U	%	206Pb	%		238U	(Ma)	235U	(Ma)	206Pb	(Ma)	conc %
a001	4030.56	152.207	12.5476	0.689262	7199.75	0.0778587	2.14168	0.61045	3.46315	0.0568646	2.72151	0.618419	483.329	9.98053	483.844	13.4175	486.284	60.0718	99.3922
a002	31192.3	98.2501	53.1367	1.72051	4986.76	0.415168	1.97431	7.37617	2.43071	0.128856	1.4179	0.812236	2238.51	37.4465	2158.09	21.9705	2082.43	24.9508	107.495
a003	56166.2	195.996	79.1231	0.363442	3103.46	0.380185	1.87204	7.13102	2.11362	0.136037	0.981252	0.885703	2077.15	33.3283	2127.92	18.9985	2177.34	17.0852	95.3983
a004	12014.9	372.586	27.5558	1.20926	270.916	0.0572297	2.18165	0.728943	7.05281	0.0923785	6.7069	0.309331	358.756	7.6175	555.933	30.6509	1475.18	127.23	24.3195
a005	18067.4	619.895	60.8597	1.02262	2885.89	0.0880528	1.94688	0.709822	2.60384	0.0584662	1.72906	0.747695	544.011	10.1646	544.641	11.0357	547.278	37.7699	99.403
a006	20506	331.182	45.937	0.11402	909.802	0.139492	1.95514	1.60989	2.88925	0.0837042	2.12725	0.676695	841.786	15.4473	974.066	18.2595	1285.69	41.424	65.4736
a007	8085.17	281.608	20.9075	1.18354	628.406	0.0612756	2.05597	0.613671	4.10494	0.0726352	3.55296	0.500852	383.378	7.65689	485.873	15.9761	1003.79	72.1131	38.193
a008	7101.49	379.673	22.1102	0.429883	11056.5	0.0577703	2.30449	0.439759	2.93837	0.0552088	1.823	0.784276	362.051	8.11857	370.082	9.15412	420.69	40.6987	86.0613
a009	60899.7	133.803	82.1301	0.2641	13448.2	0.55507	6.778	16.1546	7.08141	0.21108	2.05063	0.957154	2846.23	157.879	2885.99	70.0754	2913.85	33.2091	97.6791
a010	3313.29	165.712	12.0253	1.32519	2218.94	0.0592531	2.53726	0.461156	4.3594	0.0564463	3.54495	0.582021	371.081	9.15595	385.062	14.0674	469.968	78.4678	78.9589
a011	36581.2	378.773	77.172	0.782403	1183.76	0.184045	1.8948	1.97743	2.38808	0.0779246	1.45349	0.793442	1089.04	19.0142	1107.84	16.2332	1144.95	28.8846	95.1163
a012	24873	80.8633	33.8398	0.802865	2805.4	0.359364	1.9287	6.4722	2.28311	0.130622	1.22177	0.844768	1979.16	32.9527	2042.13	20.2811	2106.34	21.4414	93.9618
a013	10892	222.013	31.8254	1.72422	639.993	0.111499	2.27828	0.964057	5.63282	0.0627092	5.15152	0.404465	681.447	14.7497	685.396	28.4694	698.382	109.73	97.5751
a014	19986.9	62.5866	29.9443	1.22843	15295.9	0.388461	1.9297	7.09516	2.54181	0.132469	1.6544	0.759184	2115.69	34.8978	2123.44	22.8767	2130.95	28.9541	99.284
a015	8647.84	283.197	31.6695	1.7656	14880.8	0.0890583	2.15095	0.723282	2.94794	0.0589023	2.01587	0.729646	549.965	11.3489	552.603	12.6416	563.486	43.9144	97.6006
a016	10236	516.314	38.736	1.67151	6049.98	0.060564	1.88294	0.454576	2.58144	0.0544366	1.76589	0.729416	379.055	6.93531	380.479	8.22469	389.154	39.6419	97.4047
a017	2803.31	85.3785	8.5013	0.791337	1756.47	0.0920484	2.57707	0.753084	4.18378	0.0593371	3.29587	0.615966	567.64	14.0181	570.012	18.415	579.486	71.6047	97.9557
a018	9061.4	172.073	34.8528	3.20064	13552.1	0.12336	2.07906	1.15331	3.34358	0.067806	2.6186	0.621805	749.876	14.7346	778.804	18.3484	862.631	54.3241	86.929
a019	9862.87	34.726	14.9938	1.0189	1095.51	0.365958	1.87725	6.68893	3.24575	0.132563	2.6478	0.578372	2010.35	32.5034	2071.16	29.0831	2132.2	46.3333	94.2855
a020	6558.03	340.075	22.5276	0.929492	12282.4	0.0600632	1.91625	0.448677	2.96135	0.0541781	2.25778	0.647088	376.01	7.00298	376.352	9.3558	378.462	50.7796	99.3521
a021	214545	400.324	225.396	0.493134	52665.2	0.505523	2.33197	12.481	2.4021	0.179064	0.576193	0.970805	2637.49	50.6758	2641.3	22.8361	2644.22	9.56371	99.7455
a022	177038	314.42	171.754	0.233349	404.368	0.480741	2.70831	11.5787	3.07981	0.174681	1.46638	0.879376	2530.49	56.933	2570.95	29.2016	2603.01	24.4355	97.214
a023	35610.2	373.564	63.3145	0.518982	262.19	0.149725	1.95892	1.54075	4.83575	0.0746339	4.42121	0.405091	899.42	16.466	946.801	30.2211	1058.66	88.9941	84.9584
a024	31951.7	797.013	83.7907	0.529908	796.252	0.0988069	1.88436	0.990978	2.30891	0.0727404	1.33427	0.816124	607.413	10.9324	699.219	11.7366	1006.73	27.069	60.3353
a025	16583.8	180.054	22.8439	1.28643	144.985	0.0871876	2.78641	0.93691	6.8934	0.0779367	6.30515	0.404214	538.883	14.4211	671.263	34.4346	1145.26	125.293	47.0534
a026	2212.87	75.9709	7.4887	1.13665	3304.4	0.0857124	2.62832	0.686019	6.24073	0.0580485	5.66027	0.421156	530.13	13.3899	530.406	26.1163	531.593	123.974	99.7248
a027	9507.03	119.834	16.6462	0.455973	182.099	0.12126	2.43856	1.07434	12.8402	0.064257	12.6065	0.189916	737.813	17.023	740.866	69.8748	750.102	266.273	98.3617
a028	27012.7	296.808	41.2433	1.36814	155.688	0.102194	2.24086	0.969402	6.89094	0.0687984	6.51641	0.325189	627.253	13.4076	688.155	35.0388	892.7	134.549	70.2646
a029	6530.1	34.8433	15.8264	0.698077	2589.07	0.402598	2.39563	7.29602	3.6212	0.131436	2.71552	0.661557	2180.99	44.4809	2148.32	32.863	2117.24	47.5979	103.011
a030	7081.85	266.69	19.9725	0.52158	4194.45	0.0741318	5.10438	0.574928	5.46792	0.056248	1.96045	0.933515	461.001	22.7497	461.197	20.4727	462.172	43.4532	99.7466
a031	25770.3	273.18	30.7981	0.382774	132.092	0.0764159	2.39888	1.9581	9.37109	0.185844	9.05885	0.255988	474.694	10.9876	1101.23	65.024	2705.73	149.49	17.5441
a032	20671.1	778.816	33.4832	0.470297	172.849	0.0336138	3.84185	0.642667	4.95906	0.138665	3.13569	0.774712	213.126	8.05914	503.956	19.8936	2210.6	54.3988	9.64108
a033	11114.3	564.633	36.3361	0.883571	3479.39	0.0583142	1.8699	0.475781	3.2773	0.0591741	2.6915	0.570561	365.365	6.64539	395.174	10.7854	573.507	58.5335	63.7071
a034	6317.58	324.993	24.991	0.679138	575.255	0.072618	2.09672	0.581479	4.31311	0.0580749	3.76917	0.486128	451.909	9.15728	465.411	16.2315	532.588	82.5403	84.8515
a035	8472.5	278.315	25.6093	0.752164	14693.2	0.0846972	2.22112	0.682547	2.69339	0.058447	1.52348	0.824654	524.099	11.1899	528.312	11.1552	546.557	33.2834	95.8911
a036	8391.57	56.9242	15.6283	0.443636	4039.44	0.264496	1.87749	3.55183	2.85626	0.097394	2.1525	0.657325	1512.8	25.366	1538.84	22.8865	1574.81	40.2962	96.0626
a037	4501.43	235.056	15.197	0.808853	8418.67	0.0595542	2.52325	0.444518	3.47621	0.0541347	2.39107	0.725863	372.914	9.14905	373.433	10.9203	376.657	53.7946	99.0061
a038	3623.71	142.03	11.3586	0.0947392	1496.8	0.0846519	1.90393	0.680043	4.16916	0.0582637	3.70903	0.456671	523.83	9.58603	526.8	17.2816	539.692	81.1253	97.0609
a039	15450.4	535.117	39.4967	1.14892	500.68	0.0609382	1.88801	0.455649	4.82318	0.05423	4.43829	0.391446	381.329	6.99453	381.227	15.4467	380.611	99.7837	100.189
a040	4080.91	99.7107	13.6633	1.23801	6618.6	0.117701	2.05716	1.01861	3.53449	0.0627661	2.87415	0.582025	717.32	13.9802	713.215	18.2732	700.314	61.2016	102.428
a041	14458.6	454.357	36.2717	0.074076	1070.88	0.0837009	2.00174	0.644283	5.1347	0.0558272	4.72844	0.389845	518.175	9.9743	504.955	20.6372	445.501	105.109	116.313
a042	12188.6	622.637	40.3065	0.919821	2898.39	0.0581125	2.30916	0.458888	3.54383	0.0572711	2.68822	0.6516	364.136	8.1806	383.484	11.382	501.988	59.1771	72.5389
a043	6031.52	285.001	19.4455	1.06252	1854.58	0.059303	1.98628	0.511879	3.87691	0.0626023	3.32944	0.512335	371.385	7.17226	419.712	13.4163	694.747	70.9612	53.4561
a044	12973.3	164.917	31.3162	0.783646	17266.9	0.169345	1.87641	1.77925	2.71872	0.0762018	1.96737	0.690181	1008.5	17.5415	1037.91	17.8284	1100.38	39.3549	91.6502
a045	6899.99	201.601	20.7477	0.815026	741.666	0.0922494	2.07443	0.89995	3.64035	0.0707544	2.99147	0.569843	568.827	11.3042	651.701	17.6612	950.327	61.2164	59.8558
a046	6959.57	151.457	17.2386	0.426497	287.699	0.104189	2.24971	1.30178	4.61863	0.0906177	4.03368	0.487094	638.912	13.6988	846.506	26.8752	1438.58	76.8988	44.4126
a047	7909.47	334.651	25.4527	0.944277	720.454	0.0675683	2.27838	0.596891	3.36183	0.0640694	2.47202	0.67772	421.489	9.30261	475.259	12.8401	743.923	52.2659	56.6576
a048	31233.2	137.714	56.9386	0.770847	25086.9	0.372505	3.03911	6.49763	3.48609	0.126509	1.70783	0.87178	2041.18	53.3925	2045.58	31.149	2050.02	30.1634	99.5688
a049	24947.9	305.702	35.4711	0.996231	87.0531	0.0745793	3.62245	2.11382	6.53457	0.205565	5.43861	0.554351	463.686	16.2273	1153.32	46.072	2870.9	88.4097	16.1513
a050	3957.74	75.2203	8.98944	1.029	381.74	0.0950493	2.57137	1.27415	6.56323	0.0972232	6.03854	0.391784	585.33	14.404	834.244	38.0416	1571.52	113.094	37.2461
a051	19934.7	579.48	56.3317	0.726959	1809.7	0.090135	2.58047	0.729634	3.75019	0.0587097	2.72124	0.688089	556.336	13.7687	556.338	16.1917	556.349	59.352	99.9976
a052	158460	1068.96	179.124	0.481431	93.7645	0.120243	3.33952	1.52571	5.12492	0.0920259	3.88747	0.651624	731.964	23.1489	940.775	31.9313	1467.92	73.8176	49.864
a053	5489.86	279.045	19.0374	0.984662	10251.8	0.0611405	2.01832	0.457464	3.45706	0.0542659	2.80671	0.583825	382.558	7.50095	382.493	11.078	382.101	63.0853	100.12
a054	7226.45	355.151	24.3863	0.930074	537.945	0.0601884	1.90606	0.606752	5.33135	0.0731135	4.97898	0.357519	376.771	6.97941	481.51	20.6509	1017.1	100.852	37.0437
a055	23089.9	652.208	40.9471	0.980249	285.268	0.0518488	2.41183	0.44125	4.33903	0.0617228	3.60698	0.555845	325.862	7.66846	371.134	13.579	664.518	77.2601	49.0374
a056	231808	443.194	237.527	0.267444	1893.91	0.493726	2.48455	11.7804	2.60257	0.17305	0.774831	0.954654	2586.78	53.1583	2587.11	24.6553	2587.36	12.9312	99.9774
a057	324179	752.684	189.979	0.588016	32.0981	0.0520006	9.60339	3.86779	10.4146	0.539452	4.02983	0.922105	326.792	30.6738	1606.99	87.7054	4352.81	59.0351	7.50762
a058	3230.13	124.865	10.2533	0.772341	1600.52	0.0750292	2.27242	0.59572	3.57262	0.0575851	2.75676	0.636065	466.384	10.232	474.514	13.6337	514.013	60.5612	90.734
a059	21595.9	387.8	49.8931	1.18672	399.106	0.0999982	2.23881	1.37988	9.28854	0.10008	9.01469	0.241029	614.398	13.1334	880.39	56.2121	1625.58	167.651	37.7957
a060	9303.6	499.018	30.264	0.942196	3628.9	0.054325	2.18147	0.416293	3.20861	0.0555775	2.35295	0.679881	341.02	7.24998	353.397	9.62164	435.528	52.3943	78.3003
a061	7831.37	182.976	23.6655	0.966186	12427.6	0.115568	2.3495	1.01806	3.21802	0.0638904	2.19898	0.730107	705.003	15.7096	712.938	16.6191	738.005	46.5378	95.5282
a062	13753	403.468	58.2512	0.253951	9121.26	0.146255	1.99536	1.42065	2.56209	0.0704491	1.60713	0.778799	879.935	16.4332	897.635	15.3839	941.47	32.9328	93.4639
a063	347450	505.284	305.961	0.139172	33632	0.560713	1.91431	16.3683	2.61358	0.21172	1.77939	0.732447	2869.58	44.4883	2898.56	25.3231	2918.76	28.8041	98.315
a064	290468	689.291	240.429	0.53577	40.5242	0.126476	3.66294	9.75452	4.11273	0.559366	1.87014	0.890635	767.731	26.5662	2411.87	38.6015	4405.84	27.3185	17.4253
a065	54607.7	534.231	71.101	0.902166	78.7885	0.0810927	1.90521	2.86736	5.46751	0.256448	5.12483	0.348461	502.641	9.21915	1373.38	42.0187	3225.02	80.8746	15.5857
a066	4577.59	148.317	15.4367	0.899144	7762.3	0.0966945	1.89472	0.796532	3.62133	0.0597448	3.08611	0.52321	595.009	10.7781	594.87	16.4352	594.343	66.8803	100.112
a067	16409.4	51.1997	23.9964	0.869768	6539.21	0.401855	2.01461	7.42319	2.39902	0.133974	1.30255	0.839764	2177.58	37.3364	2163.77	21.6975	2150.7	22.7463	101.25
a068	4153.37	105.972	14.317	1.5328	6729.22	0.108732	2.30896	0.937254	3.82398	0.0625169	3.0482	0.603811	665.382	14.6137	671.444	18.9612	691.837	64.9981	96.1761
a069	115802	222.986	115.654	0.717164	62910	0.442721	1.90015	11.4053	2.04491	0.186842	0.755704	0.929209	2362.81	37.6984	2556.86	19.2716	2714.56	12.4604	87.0421
a070	25267.8	74.2159	34.5755	0.771583	229.807	0.38863	2.18508	7.10768	3.84597	0.132645	3.16495	0.568148	2116.47	39.5427	2125.01	34.8252	2133.27	55.3763	99.2123
a071	6868.03	156.054	15.0643	0.495876	291.575	0.0853157	2.44649	1.07485	11.2218	0.0913733	10.9519	0.218012	527.774	12.4094	741.118	60.8129	1454.39	208.341	36.2882
a072	5934.84	315.057	20.773	0.919237	11034	0.0589995	2.43946	0.443088	3.10598	0.0544678	1.92253	0.785408	369.538	8.76718	372.428	9.72981	390.443	43.1486	94.646
a073	10254.5	270.942	31.1097	0.895034	17062.7	0.101944	2.25864	0.856252	3.1236	0.0609172	2.15764	0.72309	625.79	13.4841	628.075	14.7366	636.312	46.4323	98.3464
a074	5370.21	174.483	14.3088	0.768815	2107.27	0.0731188	2.32743	0.68102	3.20786	0.0675507	2.20758	0.72554	454.918	10.2311	527.391	13.2822	854.798	45.854	53.2194
a075	34268.5	312.133	121.918	1.11183	987.778	0.340217	2.00367	5.89579	2.95463	0.125685	2.17143	0.678148	1887.71	32.8725	1960.61	25.9797	2038.47	38.4023	92.6043
a076	45872.6	1085.53	89.7131	0.135989	479.189	0.0714115	3.6364	1.05276	5.14704	0.10692	3.64261	0.706503	444.654	15.6433	730.248	27.1628	1747.57	66.7024	25.4442
a077	7751.95	242.52	24.2205	0.877704	550.286	0.0859577	2.16135	0.766628	2.72697	0.0646842	1.6628	0.792584	531.586	11.0379	577.827	12.0874	764.083	35.0422	69.5718
a078	491056	1136.31	551.875	0.196078	2772.09	0.461899	1.95182	10.1212	2.19833	0.158922	1.01147	0.887864	2447.94	39.8777	2445.91	20.5204	2444.23	17.1217	100.152
a079	27399.7	186.789	52.845	0.475536	29161.1	0.270279	2.07036	3.54772	2.30685	0.0951997	1.01744	0.897483	1542.22	28.4601	1537.93	18.4392	1532.03	19.1548	100.665
a080	25948.9	564.26	48.9069	0.928811	176.106	0.0697187	1.94213	0.567687	5.85338	0.0590553	5.52179	0.331797	434.46	8.16491	456.517	21.7535	569.134	120.174	76.3371
a081	5893.1	256.685	28.6369	1.00298	8989.61	0.0973455	1.92646	0.890989	2.98765	0.0663828	2.2836	0.644807	598.834	11.0261	646.901	14.3952	818.468	47.707	73.1652
a082	16004.3	330.552	26.8321	0.878321	164.505	0.0639616	2.33833	0.565122	10.9949	0.0640799	10.7433	0.212675	399.673	9.06824	454.855	41.132	744.269	227.134	53.7001
a083	164724	386.91	140.337	0.304204	62.9707	0.217819	3.91341	4.24187	5.20501	0.141241	3.43182	0.751853	1270.34	45.2804	1682.16	43.6952	2242.48	59.331	56.6488
a084	11078.5	559.274	34.3557	0.684835	1133	0.0571906	2.05138	0.424395	3.69264	0.05382	3.07041	0.555532	358.518	7.15775	359.189	11.2333	363.526	69.2386	98.6222
a085	71555.5	399.804	141.277	0.781786	651.855	0.311901	3.08314	4.96881	3.32653	0.115541	1.24901	0.926835	1750.06	47.4269	1814.03	28.5148	1888.33	22.4812	92.6774
a086	75020.5	617.277	84.1245	0.88213	57.7672	0.0741891	2.31178	3.22035	3.10544	0.31482	2.07351	0.744429	461.344	10.3008	1462.07	24.3503	3544.71	31.9465	13.015
a087	63642.6	204.238	83.7736	0.492446	1016.64	0.369358	1.84852	6.48307	2.23179	0.127301	1.25055	0.828267	2026.38	32.2223	2043.6	19.8251	2061.03	22.0593	98.3185
a088	2665.04	128.298	9.45112	0.577409	471.066	0.0699736	2.65483	0.631738	6.12201	0.065479	5.51642	0.433653	435.997	11.2019	497.178	24.3562	789.764	115.775	55.2059
a089	21448	301.727	29.1511	1.30509	115.195	0.064549	2.37456	0.572052	9.43391	0.0642754	9.13018	0.251704	403.231	9.28832	459.341	35.4694	750.705	192.828	53.7137
a090	2965.9	95.8845	9.31662	0.740825	5092.55	0.0896498	2.0962	0.72769	3.84568	0.0588703	3.22416	0.545078	553.466	11.1272	555.197	16.5815	562.302	70.2502	98.4286
a091	3852.94	129.625	17.5758	2.42802	6631.55	0.0900134	2.13929	0.727627	3.68395	0.0586273	2.99915	0.580706	555.616	11.3985	555.159	15.8779	553.285	65.4474	100.421
a092	5345.25	176.087	17.7452	1.04677	8842.38	0.0867235	2.19811	0.734357	3.25902	0.0614142	2.40614	0.67447	536.13	11.3179	559.107	14.1091	653.774	51.6303	82.0054
a093	121113	863.929	97.316	0.8974	62.5376	0.0534751	2.99567	0.647635	9.14954	0.0878371	8.64523	0.327413	335.821	9.81003	507.022	37.1901	1378.92	166.167	24.3539
a094	4274.48	238.518	15.3628	1.00606	3678.05	0.0565749	2.29807	0.420685	3.80162	0.0539303	3.0284	0.604496	354.762	7.93728	356.541	11.4951	368.138	68.2357	96.3664
a095	42682.5	260.373	43.4867	1.01497	52.0984	0.0817071	5.4566	3.88332	8.49735	0.3447	6.51388	0.642152	506.304	26.6248	1610.22	71.0404	3683.74	99.3939	13.7443
a096	4153.05	150.828	14.0745	1.08821	7128.95	0.0816266	2.99824	0.665557	4.31598	0.059136	3.10456	0.694682	505.825	14.6026	518.007	17.6648	572.106	67.5324	88.4145
a097	6880.1	200.796	21.9307	1.09313	4143.84	0.0939881	2.91272	0.769189	3.52475	0.0593552	1.98492	0.826363	579.08	16.1518	579.297	15.6807	580.149	43.1187	99.8158
a098	8681.38	468.959	31.1692	0.926515	16247.7	0.0600694	2.13339	0.448606	2.81714	0.054164	1.83982	0.75729	376.048	7.79778	376.303	8.89724	377.875	41.3836	99.5165
a099	11670.8	351.363	28.3562	0.911831	362.807	0.0666276	1.87901	0.87758	4.4106	0.0955282	3.99033	0.42602	415.806	7.57081	639.675	21.151	1538.51	75.0596	27.0265
a100	9099.21	400.588	22.914	0.011507	2152.74	0.0606285	2.46601	0.508883	3.89182	0.0608751	3.01083	0.63364	379.447	9.09355	417.698	13.4156	634.825	64.8089	59.7719
a101	7836.35	254.646	18.3755	0.811868	543.517	0.0617026	2.50421	0.566207	5.51989	0.0665534	4.91915	0.453671	385.972	9.38872	455.559	20.4671	823.83	102.679	46.8509
a102	144576	501.334	186.438	0.501049	7614.42	0.320369	2.37097	7.07557	2.50424	0.16018	0.806039	0.946784	1791.53	37.1922	2120.98	22.5269	2457.56	13.6259	72.8987
a103	1523.29	45.2591	4.48102	0.932047	773.115	0.0871498	2.94747	0.780635	7.7142	0.0649651	7.12891	0.382084	538.659	15.2496	585.846	34.9336	773.208	150.015	69.6654
a104	40817.1	573.649	54.8948	0.508942	206.196	0.0739779	1.94098	0.655842	3.90205	0.0642978	3.38506	0.497424	460.077	8.62453	512.067	15.8154	751.442	71.4833	61.2258
a105	16285	285.509	39.0907	1.04223	165.293	0.0911215	2.37628	1.93047	4.69408	0.153653	4.04818	0.506228	562.166	12.8054	1091.7	31.894	2386.99	68.928	23.5513
a106	23693.9	935.501	92.4788	0.0393677	682.652	0.101239	1.94605	0.85721	3.613	0.0614099	3.04412	0.538624	621.665	11.5432	628.598	17.0754	653.622	65.3214	95.1109
a107	13109.7	346.111	28.6918	1.17016	288.437	0.0628665	1.99552	0.913395	7.36552	0.105375	7.09005	0.270927	393.035	7.61328	658.861	36.3443	1720.87	130.266	22.8393
a108	97815.4	186.666	110.92	0.554079	24612.4	0.525919	2.05119	13.2402	2.28205	0.182589	1.00018	0.898838	2724.24	45.7353	2696.93	21.7762	2676.53	16.5503	101.782
a109	3042.67	82.8867	6.62756	0.540079	670.582	0.0718037	2.52379	0.771521	5.22951	0.0779291	4.5802	0.482606	447.013	10.9087	580.635	23.393	1145.07	91.0185	39.0382
a110	174383	681.185	313.235	1.21069	14894.9	0.372756	2.35749	6.45316	2.38939	0.125559	0.389138	0.986649	2042.35	41.3993	2039.54	21.2266	2036.69	6.8834	100.278
a111	20278.2	58.6768	28.9425	1.17224	706.629	0.391399	2.00117	7.00459	3.40956	0.129796	2.76051	0.586928	2129.31	36.3911	2112.01	30.7562	2095.2	48.5065	101.628
a112	6956.01	417.119	23.0597	0.470246	12879.7	0.0542005	2.29862	0.408064	3.35331	0.0546039	2.44152	0.685477	340.259	7.62292	347.48	9.9158	396.039	54.7428	85.9154
a113	136339	220.566	113.608	1.16144	69.4557	0.288398	4.12507	5.77029	5.91081	0.145112	4.23338	0.697886	1633.52	59.8005	1941.97	52.486	2289.11	72.8242	71.3604
a114	9886.13	163.813	21.2062	1.03465	393.388	0.105742	2.31306	0.960709	7.91056	0.0658935	7.56483	0.292402	647.973	14.2752	683.664	40.1395	802.994	158.429	80.6945
a115	4081.92	238.761	14.7058	0.740443	3504.76	0.0573704	2.06877	0.426754	3.28442	0.0539496	2.551	0.629874	359.614	7.23995	360.869	10.0244	368.946	57.4708	97.4705
a116	8654.05	493.196	29.7844	0.87902	7403.63	0.0546698	1.95017	0.411506	2.87987	0.0545918	2.11908	0.677172	343.128	6.5199	349.959	8.56103	395.545	47.5173	86.7482
a117	3946.61	125.617	11.3035	0.627849	4818.22	0.0839112	2.39675	0.723178	4.42733	0.0625064	3.72247	0.541354	519.426	11.9721	552.542	19.0438	691.479	79.3807	75.1182
a118	8647.87	255.513	29.5756	1.28348	3115.97	0.0968992	2.02411	0.844615	3.03118	0.0632175	2.25633	0.667762	596.211	11.537	621.689	14.1914	715.556	47.9264	83.3213
a119	4074.23	93.5978	10.9965	1.08246	1245.65	0.0986025	2.47733	1.02381	4.37734	0.0753061	3.60886	0.565945	606.214	14.3494	715.827	22.7375	1076.68	72.4466	56.3038
a120	4023.03	121.661	12.5595	0.672532	3008.62	0.0948565	2.33318	0.777156	7.28697	0.059421	6.90334	0.320185	584.195	13.0441	583.86	32.8831	582.555	149.902	100.282
a121	11300.7	463.606	40.615	1.03669	20067.9	0.07848	1.82365	0.616072	2.51956	0.0569339	1.73854	0.723794	487.044	8.5604	487.383	9.79987	488.976	38.357	99.6049
a122	5740.36	322.07	19.2151	0.697633	7207.5	0.0557456	2.01763	0.41274	3.13899	0.0536988	2.40466	0.642767	349.7	6.87138	350.847	9.35476	358.439	54.2744	97.5622
a123	13548.3	91.2373	34.4695	2.11897	4034.08	0.271113	1.98998	3.57852	2.77325	0.0957308	1.93156	0.71756	1546.45	27.4193	1544.78	22.2509	1542.5	36.3142	100.256
a124	5286.19	276.85	19.5879	1.0416	9832.49	0.0621112	2.02585	0.466449	3.9967	0.0544669	3.44522	0.506881	388.452	7.64157	388.733	12.991	390.405	77.3237	99.4997
a125	4611.98	162.611	13.3123	0.406665	8041.44	0.0815354	2.13222	0.653912	3.46721	0.0581663	2.73408	0.614967	505.281	10.3706	510.883	14.0156	536.033	59.8379	94.263
a126	2057.43	58.9764	7.11375	1.31879	3406.67	0.101226	2.27082	0.857766	4.90579	0.0614573	4.34858	0.462885	621.592	13.4701	628.903	23.2639	655.279	93.2874	94.8592
a127	140461	1227.81	217.927	0.504363	128.614	0.132197	2.98905	1.06895	4.4486	0.0586456	3.29479	0.671908	800.387	22.5377	738.226	23.6102	553.964	71.8904	144.484
a128	5235.98	118.91	9.73599	0.58416	393.857	0.0722344	2.82845	0.539843	6.78097	0.0542029	6.16291	0.417115	449.603	12.2952	438.321	24.4302	379.489	138.585	118.476
a129	5352.83	174.898	18.7737	1.10164	9173.72	0.0929588	2.13953	0.758748	3.26459	0.0591978	2.46576	0.655375	573.012	11.7414	573.288	14.4022	574.378	53.6162	99.7622
a130	13621.3	98.1138	28.4212	0.658633	5443.96	0.267355	1.98888	3.39661	3.16424	0.0921415	2.46105	0.628549	1527.36	27.1038	1503.61	25.1299	1470.3	46.7169	103.881
a131	2479.28	130.287	8.10116	0.623391	4312.06	0.0590666	2.03378	0.474426	3.81596	0.0582539	3.22882	0.532966	369.947	7.31622	394.241	12.5447	539.322	70.6264	68.5947
a132	4936.11	293.578	16.2526	0.633005	1227.21	0.052639	2.28925	0.396711	3.3346	0.0546594	2.42465	0.686514	330.703	7.38394	339.26	9.66288	398.319	54.3427	83.0248
a133	172796	602.057	110.597	0.536884	47.9885	0.0695541	7.65265	0.56479	11.8854	0.0588929	9.09392	0.643871	433.469	32.1613	454.64	44.5206	563.14	198.116	76.9735
a134	132392	511.406	217.728	1.05281	26846.3	0.365556	1.97033	6.3778	2.05235	0.126536	0.574374	0.96004	2008.46	34.0918	2029.22	18.1763	2050.4	10.1441	97.9543
a135	4430.34	140.711	14.9255	1.23355	7522.28	0.0894565	2.65047	0.736348	3.64955	0.0596994	2.50882	0.726247	552.322	14.0448	560.272	15.8379	592.699	54.3847	93.1876
a136	10330.7	192.2	34.8665	1.72975	3106.8	0.139708	1.93552	1.33042	3.61225	0.0690666	3.04993	0.535821	843.009	15.3129	859.065	21.1582	900.73	62.8951	93.5918
a137	2525.89	80.663	9.77397	1.72666	2193.89	0.0954879	2.25077	0.752909	4.33819	0.0571864	3.70862	0.518828	587.912	12.6595	569.911	19.0985	498.728	81.6855	117.882
a138	4280.03	115.885	12.8924	1.01918	1388.5	0.0951756	2.35512	0.880198	6.99702	0.0670738	6.58875	0.33659	586.074	13.2074	641.089	33.8167	840.067	137.175	69.7651
a139	17143	305.627	39.6416	1.38486	417.421	0.0949312	2.71353	1.38766	6.03404	0.106016	5.38947	0.449704	584.635	15.184	883.702	36.2474	1732.01	98.8827	33.7548
a140	8461.37	479.867	26.9551	0.522589	4690.97	0.0544014	2.10051	0.412082	2.9152	0.0549379	2.02145	0.720537	341.487	6.99007	350.373	8.67512	409.698	45.2158	83.3509
a141	350472	1067.08	428.054	0.240014	329.375	0.353381	4.38031	5.84106	4.543	0.11988	1.20485	0.964191	1950.72	74.1553	1952.52	40.1701	1954.43	21.5169	99.8102
a142	11032.6	528.114	31.308	0.348183	1434.56	0.0579743	2.69021	0.510939	3.45017	0.0639194	2.16019	0.779733	363.295	9.5101	419.081	11.9162	738.963	45.7097	49.1627
a143	10616	375.966	28.2312	0.854707	590.686	0.0631827	2.71	0.694091	7.10234	0.0796742	6.565	0.381564	394.952	10.3903	535.256	29.9853	1188.93	129.627	33.219
a144	261387	618.403	367.402	0.749042	411.772	0.506598	2.1477	12.5464	2.31383	0.179619	0.860908	0.928204	2642.09	46.7231	2646.21	21.9964	2649.36	14.2824	99.7257
a145	19924.9	110.174	18.2343	0.579937	59.8286	0.0757542	3.12951	4.05752	5.14245	0.388465	4.08056	0.608564	470.73	14.2222	1645.81	42.7799	3865.02	61.5247	12.1792
a146	36164.3	1334.11	105.604	0.278539	975.349	0.0595118	3.18928	0.464449	4.86211	0.0566022	3.66995	0.655947	372.656	11.5584	387.347	15.7793	476.067	81.1493	78.278
a147	5125.41	195.366	17.3427	0.605957	1344.31	0.082856	3.42482	0.724713	5.16193	0.0634368	3.86214	0.663477	513.147	16.9153	553.446	22.2661	722.906	81.9368	70.984
a148	14372.2	350.279	23.0058	0.609534	233.061	0.0490791	2.23661	0.881485	4.90966	0.130262	4.37062	0.455552	308.865	6.74875	641.785	23.6286	2101.5	76.7442	14.6974
a149	8216.79	467.529	30.1976	1.06943	6988.49	0.056792	2.12838	0.419288	2.88755	0.0535457	1.9514	0.737089	356.086	7.37757	355.542	8.69882	351.991	44.0943	101.164
a150	86064.6	909.783	184.463	0.331397	1611.69	0.199238	2.21531	2.17563	2.44339	0.0791976	1.0308	0.906655	1171.23	23.7695	1173.28	17.1411	1177.08	20.3885	99.5029
a within-run background-corrected mean 207Pb signal in counts per second
b U and Pb content and Th/U ratio were calculated relative to GJ-1 and are accurate to approximately 10%.
c corrected for background, mass bias, laser induced U-Pb fractionation and common Pb (if detectable, see analytical method) using
Stacey & Kramers (1975) model Pb composition. 207Pb/235U calculated using 207Pb/206Pb/(238U/206Pb × 1/137.88). Errors are
propagated by quadratic addition of within-run errors (2SE) and the reproducibility of GJ-1 (2SD).
d Rho is the error correlation defined as err206Pb/238U/err207Pb/235U.
