# Supplementary material for: A tectonic carpet of Variscan flysch at the base of a rootless accretionary prism in northwestern Iberia: U–Pb zircon age constrains from sediments and volcanic olistoliths
Source: Copernicus journal article supplement (doi:10.5194/se-12-835-2021), 2021-04-15
Supplement: Supplementary file 3 [file se-12-835-2021-supplement.zip]

| SAMPLE                                     | EASTING | NORTHING | SHORT DESCRIPTION                                                                      |
|--------------------------------------------|---------|----------|----------------------------------------------------------------------------------------|
| SILICICLASTIC ROCKS (LOWER PARAUTOCHTHON)  |         |          |                                                                                        |
| CR-ZR-01                                   | 678159  | 4569706  | Greenish-grey fine grained massive quartz lithic sandstone                             |
| MEI-ZR-01                                  | 683703  | 4569953  | Middle-grained greyish lithic sandstones with sedimentary laminations                  |
| GIM-ZR-01                                  | 674114  | 4644518  | Lithic microconglomerate, lithic-sandstones and phyllite rhythms. Light brown colour   |
| EC-PO-293                                  | 675598  | 4642546  | Quartz lithic sandstone; impure grey quartzites with <10cm clasts                      |
| AD-PO-66                                   | 673233  | 4643613  | Quartz lithic sandstone and phyllite rhythm. Feldspar and quartz eyes: pyroclastic?    |
| AD-PO-48B                                  | 621227  | 4596860  | Massive fine grain sanstone                                                            |
| MIR-41                                     | 681845  | 4609510  | Quartz lithic sandstone and phyllite rhythms (cm-dm)                                   |
| AD-PO-49                                   | 645744  | 4594230  | Quartz lithic sandstone and phyllite rhythms (cm-dm)                                   |
| AD-PO-55                                   | 644424  | 4595258  | Quartz lithic sandstone and phyllite rhythms. Fining upwards                           |
| AD-PO-57                                   | 642881  | 4597741  | Quartz lithic sandstone and phyllite rhythm (cm-dm)                                    |
| PICON-2                                    | 601064  | 4844313  | Fine-grained black quartzites with pyrite and black pelite laminations                 |
| VOLCANIC ROCKS (UPPER PARAUTOCHTHON)       |         |          |                                                                                        |
| P-381                                      | 674426  | 4603329  | Intensely foliated white rhyolite with quartz phenocrysts                              |
| P-385                                      | 681845  | 4609510  | Foliated dacites with quartz, feldspar and plagioclase phenocrysts                     |
| VOLCANIC OLISTOLITHS (LOWER PARAUTOCHTHON) |         |          |                                                                                        |
| EC-PO-337                                  | 692792  | 4642324  | Rhyodacitic pyroclastic tuff, quartz eyes and shards. Inside quartz lithic sandstone   |
| EC-PO-419                                  | 663291  | 4643585  | Acidic pyroclastic tuff, quartz eyes and S2 pervasive foliation                        |
| PEI-1                                      | 706355  | 4638642  | Welded rhyolitic tuff with disseminated pyrite. Reddish when weathered.                |
| RAB-1                                      | 730014  | 4628291  | Whitish rhyolitic pyroclastic tuff. Quartz eyes and shards. Inside grey fine sandstone |
