# Supplementary material for: A tectonic carpet of Variscan flysch at the base of a rootless accretionary prism in northwestern Iberia: U–Pb zircon age constrains from sediments and volcanic olistoliths
Source: Copernicus journal article supplement (doi:10.5194/se-12-835-2021), 2021-04-15
Supplement: Supplementary file 3 [file Supplementary Table 12_P381.xls]

## Sheet: PlotDat0
Source sheet	all data	0.635715	0.0821906	440		460		480		500		520		540		0.52	0.068175	0.52	0.0680531	0.512308	0.0673218	0.5269	0.068	0.665831	0.0833089	0.664896	0.0847723	0.58986	0.0747461	0.616457	0.0759753	0.606048	0.0769724	0.605245	0.0756491	0.609632	0.0755742	0.594633	0.0742638	0.690365	0.0851717	0.527468	0.0720245
Plot name	Concordia0	0.64431	0.0832715	0.543504	0.0706383	0.574259	0.0739651	0.605627	0.0773023	0.637621	0.0806498	0.670251	0.0840077	0.703532	0.087376	0.52	0.068175	0.52	0.0680531	0.542391	0.0706383	0.697367	0.09	0.66524	0.0836303	0.664482	0.0849997	0.589427	0.0749923	0.615778	0.076309	0.605568	0.0772297	0.604703	0.0759509	0.608992	0.0759256	0.594138	0.0745365	0.689614	0.0855741	0.589291	0.0786978
Plot Type	1	0.568191	0.0734259	0.543482	0.070657	0.574236	0.0739847	0.605603	0.0773227	0.637595	0.0806712	0.670224	0.08403	0.703503	0.0873993	0.526493	0.0688924	0.526493	0.0687692	0.573073	0.0739651			0.663514	0.0838964	0.663292	0.0851606	0.588178	0.0751784	0.613786	0.0765952	0.604192	0.0774068	0.603125	0.0761961	0.607125	0.0762141	0.592696	0.0747595	0.687418	0.0859089	0.653595	0.0854127
1st free col	43	0.581603	0.0750708	0.543419	0.0706749	0.574169	0.0740035	0.605531	0.0773425	0.637518	0.0806918	0.670143	0.0840515	0.703417	0.0874217	0.533014	0.0696103	0.533014	0.0694858	0.604365	0.0773023			0.660719	0.0840969	0.661373	0.085249	0.586161	0.0752972	0.610557	0.0768228	0.601974	0.0774967	0.600572	0.0763752	0.604104	0.0764285	0.590362	0.0749244	0.683863	0.0861631
Sigma Level	2	0.582254	0.0751413	0.543316	0.0706915	0.574059	0.0740209	0.605415	0.0773606	0.637395	0.0807108	0.670011	0.0840713	0.703278	0.0874423	0.539562	0.0703287	0.539562	0.0702028	0.636279	0.0806498			0.656964	0.0842241	0.658799	0.0852613	0.583454	0.075344	0.606215	0.0769831	0.598997	0.0774962	0.597143	0.0764815	0.600045	0.0765605	0.587226	0.0750249	0.679085	0.086327
Absolute Errs	FALSE	0.577755	0.0744775	0.543178	0.070706	0.573912	0.0740361	0.605258	0.0773765	0.637228	0.0807274	0.669835	0.0840887	0.703091	0.0874604	0.546139	0.0710476	0.546139	0.0709204	0.668829	0.0840077			0.652392	0.0842732	0.655667	0.0851972	0.580159	0.0753171	0.600928	0.0770699	0.595377	0.0774051	0.592968	0.0765107	0.595104	0.0766051	0.583409	0.075057	0.673268	0.0863943
Symbol Type	1	0.577085	0.0742861	0.543009	0.0707179	0.573732	0.0740485	0.605066	0.0773896	0.637024	0.080741	0.669619	0.0841029	0.702863	0.0874752	0.552743	0.0717669	0.552743	0.0716384	0.702025	0.087376			0.64718	0.0842423	0.652099	0.085059	0.576405	0.0752175	0.594898	0.0770799	0.591253	0.0772271	0.588209	0.0764618	0.58947	0.0765606	0.579056	0.0750196	0.666635	0.0863623
Inverse Plot	FALSE	0.569491	0.0732469	0.542817	0.0707267	0.573527	0.0740578	0.604848	0.0773993	0.636793	0.0807512	0.669373	0.0841135	0.702602	0.0874863	0.559376	0.0724867	0.559376	0.0723569	IsoLine	IsoLine			0.641527	0.0841325	0.648232	0.0848522	0.572335	0.0750491	0.588357	0.0770126	0.586783	0.0769689	0.583048	0.0763366	0.58336	0.0764287	0.574337	0.074914	0.659441	0.0862324
Color Plot	TRUE	0.652041	0.0838128	0.542608	0.0707321	0.573304	0.0740635	0.604611	0.0774053	0.636541	0.0807574	0.669106	0.08412	0.702319	0.087493	0.566037	0.073207	0.566037	0.0730758					0.63565	0.0839481	0.644214	0.0845846	0.568106	0.0748183	0.581557	0.0768708	0.582139	0.0766405	0.577684	0.07614	0.577008	0.0762145	0.569431	0.0747444	0.651963	0.0860095
3D plot	FALSE	IsoLine	IsoLine	0.542391	0.070734	0.573073	0.0740655	0.604365	0.0774073	0.636279	0.0807595	0.668829	0.0841222	0.702025	0.0874953	0.572726	0.0739278	0.572726	0.0737953					0.629776	0.0836962	0.6402	0.0842666	0.56388	0.074534	0.574758	0.0766597	0.577499	0.0762544	0.572322	0.0758795	0.57066	0.0759261	0.564527	0.0745173	0.644488	0.0857022
Linear	FALSE			0.542174	0.0707321	0.572842	0.0740635	0.604119	0.0774053	0.636018	0.0807574	0.668551	0.08412	0.701732	0.087493	0.579445	0.0746491	0.579445	0.0745152					0.62413	0.0833864	0.636343	0.0839103	0.55982	0.0742071	0.568223	0.0763876	0.573042	0.0758256	0.567169	0.0755651	0.564559	0.0755747	0.559814	0.0742413	0.637303	0.0853223
Data Range	C4:G12			0.541966	0.0707267	0.572619	0.0740578	0.603882	0.0773993	0.635766	0.0807512	0.668284	0.0841135	0.701449	0.0874863	0.586191	0.0753709	0.586191	0.0752357					0.61893	0.0830306	0.632793	0.0835295	0.556082	0.0738502	0.562201	0.0760649	0.568939	0.0753705	0.562423	0.0752089	0.558939	0.0751738	0.555473	0.0739271	0.630684	0.0848843
Filled Symbols	TRUE			0.541773	0.0707179	0.572414	0.0740485	0.603664	0.0773896	0.635534	0.080741	0.668038	0.0841029	0.701188	0.0874752	0.592967	0.0760931	0.592967	0.0759566					0.614374	0.0826426	0.629685	0.0831387	0.552809	0.073477	0.556926	0.075704	0.565348	0.0749066	0.558266	0.0748246	0.554016	0.0747388	0.551671	0.0735867	0.624886	0.0844052
ConcAge	FALSE			0.541605	0.070706	0.572234	0.0740361	0.603472	0.0773765	0.635331	0.0807274	0.667823	0.0840887	0.70096	0.0874604	0.599772	0.0768159	0.599772	0.0766779					0.610639	0.0822372	0.62714	0.0827531	0.550127	0.0731019	0.552598	0.0753188	0.562407	0.0744517	0.554858	0.074427	0.54998	0.0742864	0.548554	0.0732333	0.620132	0.0839033
ConcSwap	FALSE			0.541466	0.0706915	0.572087	0.0740209	0.603315	0.0773606	0.635164	0.0807108	0.667646	0.0840713	0.700773	0.0874423	0.606605	0.0775391	0.606605	0.0773998					0.607867	0.08183	0.625254	0.0823874	0.548139	0.0727391	0.549386	0.074924	0.560228	0.0740233	0.55233	0.0740313	0.546986	0.073834	0.546241	0.0728804	0.616604	0.083398
1st Symbol-row	1			0.541363	0.0706749	0.571977	0.0740035	0.603199	0.0773425	0.63504	0.0806918	0.667514	0.0840515	0.700634	0.0874217	0.613468	0.0782628	0.613468	0.0781222					0.606165	0.0814366	0.6241	0.0820556	0.546922	0.0724028	0.547411	0.0745349	0.558895	0.0736379	0.550779	0.0736528	0.545148	0.0733989	0.544821	0.0725416	0.614438	0.0829086
				0.5413	0.070657	0.57191	0.0739847	0.603127	0.0773227	0.634964	0.0806712	0.667434	0.08403	0.700548	0.0873993	0.62036	0.078987	0.62036	0.078845					0.6056	0.0810723	0.623723	0.0817706	0.546522	0.0721058	0.54675	0.0741663	0.558461	0.0733102	0.550265	0.0733059	0.544537	0.072998	0.54435	0.07223	0.613716	0.0824539
				0.541279	0.0706383	0.571887	0.0739651	0.603103	0.0773023	0.634938	0.0806498	0.667406	0.0840077	0.700519	0.087376	0.627282	0.0797116	0.627282	0.0795683					0.606191	0.0807509	0.624138	0.0815433	0.546955	0.0718595	0.547429	0.0738326	0.55894	0.073053	0.550807	0.0730041	0.545178	0.0726465	0.544845	0.0719573	0.614468	0.0820514
				0.5413	0.0706196	0.57191	0.0739455	0.603127	0.0772818	0.634964	0.0806284	0.667434	0.0839854	0.700548	0.0873528	0.634233	0.0804368	0.634233	0.0802922					0.607917	0.0804848	0.625327	0.0813823	0.548204	0.0716735	0.549421	0.0735464	0.560316	0.0728759	0.552385	0.0727589	0.547044	0.0723581	0.546287	0.0717343	0.616664	0.0817167
				0.541363	0.0706017	0.571977	0.0739267	0.603199	0.0772621	0.63504	0.0806078	0.667514	0.0839639	0.700634	0.0873304	0.641214	0.0811624	0.641214	0.0810164					0.610711	0.0802843	0.627246	0.081294	0.550221	0.0715547	0.55265	0.0733187	0.562535	0.072786	0.554937	0.0725798	0.550065	0.0721437	0.548621	0.0715694	0.620219	0.0814625
				0.541466	0.0705851	0.572087	0.0739093	0.603315	0.0772439	0.635164	0.0805888	0.667646	0.0839441	0.700773	0.0873098	0.648225	0.0818886	0.648225	0.0817412					0.614466	0.0801571	0.629821	0.0812817	0.552929	0.0715079	0.556992	0.0731585	0.565511	0.0727865	0.558367	0.0724735	0.554124	0.0720117	0.551757	0.0714689	0.624997	0.0812986
				0.541605	0.0705706	0.572234	0.0738941	0.603472	0.077228	0.635331	0.0805722	0.667823	0.0839267	0.70096	0.0872917	0.655265	0.0826152	0.655265	0.0824665					0.619038	0.080108	0.632952	0.0813458	0.556223	0.0715348	0.562279	0.0730717	0.569131	0.0728776	0.562541	0.0724443	0.559066	0.0719671	0.555574	0.0714368	0.630814	0.0812313
				0.541773	0.0705587	0.572414	0.0738817	0.603664	0.0772149	0.635534	0.0805585	0.668038	0.0839125	0.701188	0.0872769	0.662336	0.0833423	0.662336	0.0831923					0.624251	0.0801389	0.63652	0.0814839	0.559977	0.0716344	0.568309	0.0730617	0.573255	0.0730556	0.5673	0.0724932	0.5647	0.0720116	0.559926	0.0714742	0.637447	0.0812633
				0.541966	0.0705499	0.572619	0.0738724	0.603882	0.0772052	0.635766	0.0805484	0.668284	0.0839019	0.701449	0.0872658	0.669437	0.0840699	0.669437	0.0839185					0.629904	0.0802487	0.640387	0.0816907	0.564047	0.0718028	0.57485	0.0731289	0.577725	0.0733138	0.572461	0.0726184	0.57081	0.0721435	0.564646	0.0715798	0.644641	0.0813932
				0.542174	0.0705444	0.572842	0.0738667	0.604119	0.0771992	0.636018	0.0805421	0.668551	0.0838954	0.701732	0.0872591	0.676568	0.084798	0.676568	0.0846452					0.635781	0.0804331	0.644405	0.0819583	0.568276	0.0720336	0.58165	0.0732708	0.58237	0.0736422	0.577826	0.072815	0.577161	0.0723577	0.569552	0.0717494	0.652119	0.0816161
				0.542391	0.0705426	0.573073	0.0738647	0.604365	0.0771972	0.636279	0.08054	0.668829	0.0838932	0.702025	0.0872568	0.68373	0.0855266	0.68373	0.0853724					0.641655	0.080685	0.64842	0.0822764	0.572502	0.0723179	0.588449	0.0734818	0.587009	0.0740283	0.583187	0.0730755	0.583509	0.0726461	0.574456	0.0719766	0.659594	0.0819234
				0.542608	0.0705444	0.573304	0.0738667	0.604611	0.0771992	0.636541	0.0805421	0.669106	0.0838954	0.702319	0.0872591	0.690922	0.0862557	0.690922	0.0861001					0.6473	0.0809948	0.652276	0.0826326	0.576562	0.0726447	0.594984	0.0737539	0.591466	0.0744571	0.58834	0.0733899	0.589611	0.0729974	0.579168	0.0722525	0.666779	0.0823033
				0.542817	0.0705499	0.573527	0.0738724	0.604848	0.0772052	0.636793	0.0805484	0.669373	0.0839019	0.702602	0.0872658	0.698145	0.0869852	0.698145	0.0868283					0.652501	0.0813506	0.655827	0.0830135	0.5803	0.0730016	0.601006	0.0740766	0.595569	0.0749122	0.593086	0.0737461	0.595231	0.0733983	0.583509	0.0725667	0.673398	0.0827412
				0.543009	0.0705587	0.573732	0.0738817	0.605066	0.0772149	0.637024	0.0805585	0.669619	0.0839125	0.702863	0.0872769	0.705399	0.0877153	0.705399	0.087557					0.657057	0.0817386	0.658934	0.0834042	0.583574	0.0733749	0.606281	0.0744376	0.59916	0.0753761	0.597243	0.0741304	0.600153	0.0738333	0.587312	0.0729071	0.679196	0.0832204
				0.543178	0.0705706	0.573912	0.0738941	0.605258	0.077228	0.637228	0.0805722	0.669835	0.0839267	0.703091	0.0872917	0.712684	0.0884458	0.712684	0.0882862					0.660792	0.082144	0.66148	0.0837898	0.586256	0.07375	0.610609	0.0748228	0.602102	0.075831	0.600651	0.074528	0.604189	0.0742858	0.590429	0.0732605	0.68395	0.0837222
				0.543316	0.0705851	0.574059	0.0739093	0.605415	0.0772439	0.637395	0.0805888	0.670011	0.0839441	0.703278	0.0873098	0.72	0.0891768	0.72	0.0890158					0.663564	0.0825512	0.663366	0.0841556	0.588243	0.0741127	0.613821	0.0752176	0.604281	0.0762594	0.603179	0.0749237	0.607184	0.0747382	0.592742	0.0736134	0.687478	0.0842276
				0.543419	0.0706017	0.574169	0.0739267	0.605531	0.0772621	0.637518	0.0806078	0.670143	0.0839639	0.703417	0.0873304	0.72	0.0891768	0.72	0.0890158					0.665265	0.0829446	0.664519	0.0844873	0.589461	0.0744491	0.615796	0.0756067	0.605613	0.0766448	0.60473	0.0753022	0.609022	0.0751732	0.594161	0.0739522	0.689644	0.084717
				0.543482	0.0706196	0.574236	0.0739455	0.605603	0.0772818	0.637595	0.0806284	0.670224	0.0839854	0.703503	0.0873528	IsoLine	IsoLine	0.72	0.0893378					0.665831	0.0833089	0.664896	0.0847723	0.58986	0.0747461	0.616457	0.0759753	0.606048	0.0769724	0.605245	0.0756491	0.609632	0.0755742	0.594633	0.0742638	0.690365	0.0851717
				0.543504	0.0706383	0.574259	0.0739651	0.605627	0.0773023	0.637621	0.0806498	0.670251	0.0840077	0.703532	0.087376			0.72	0.0893378					ErrEll	ErrEll	ErrEll	ErrEll	ErrEll	ErrEll	ErrEll	ErrEll	ErrEll	ErrEll	ErrEll	ErrEll	ErrEll	ErrEll	ErrEll	ErrEll	ErrEll	ErrEll
				ConcTikEll	ConcTikEll	ConcTikEll	ConcTikEll	ConcTikEll	ConcTikEll	ConcTikEll	ConcTikEll	ConcTikEll	ConcTikEll	ConcTikEll	ConcTikEll			0.712684	0.0886054
																		0.705399	0.0878735
																		0.698145	0.0871421
																		0.690922	0.0864112
																		0.68373	0.0856807
																		0.676568	0.0849508
																		0.669437	0.0842214
																		0.662336	0.0834924
																		0.655265	0.0827639
																		0.648225	0.0820359
																		0.641214	0.0813084
																		0.634233	0.0805814
																		0.627282	0.0798549
																		0.62036	0.0791289
																		0.613468	0.0784034
																		0.606605	0.0776783
																		0.599772	0.0769538
																		0.592967	0.0762297
																		0.586191	0.0755061
																		0.579445	0.074783
																		0.572726	0.0740604
																		0.566037	0.0733383
																		0.559376	0.0726166
																		0.552743	0.0718955
																		0.546139	0.0711748
																		0.539562	0.0704546
																		0.533014	0.0697349
																		0.526493	0.0690157
																		0.52	0.0682969
																		0.52	0.0682969
																		0.52	0.0680531
																		ConcBand	ConcBand

## Sheet: PlotDat1
Source sheet	all data	0.705788	0.0895893	440		460		480		500		520		540		560		580		0.54	0.0703767	0.54	0.0702507	0.512308	0.0673218	0.553569	0.07	0.736331	0.0911549	0.667933	0.0815115	0.669608	0.0832295	0.696127	0.084478	0.664259	0.0820115	0.687207	0.0838749	0.68396	0.0829131	0.635622	0.0783157	0.673755	0.0829883	0.680313	0.0834691	0.741618	0.0905456
Plot name	Concordia0	0.634068	0.0803402	0.543504	0.0706383	0.574259	0.0739651	0.605627	0.0773023	0.637621	0.0806498	0.670251	0.0840077	0.703532	0.087376	0.737476	0.0907549	0.772097	0.0941442	0.54	0.0703767	0.54	0.0702507	0.542391	0.0706383	0.75918	0.096	0.735725	0.0914947	0.66727	0.0818611	0.669107	0.0835052	0.695352	0.0848886	0.663746	0.0822976	0.68647	0.0842833	0.683186	0.0833259	0.635068	0.0786256	0.673185	0.0833072	0.679635	0.0838482	0.740966	0.0908857
Plot Type	1	0.644565	0.0815708	0.543482	0.070657	0.574236	0.0739847	0.605603	0.0773227	0.637595	0.0806712	0.670224	0.08403	0.703503	0.0873993	0.737446	0.0907791	0.772064	0.0941693	0.54771	0.071219	0.54771	0.0710915	0.573073	0.0739651			0.733968	0.0917613	0.66533	0.0821523	0.667662	0.0837065	0.693088	0.0852294	0.662256	0.0825241	0.684326	0.0846103	0.680924	0.0836673	0.633464	0.0788658	0.671532	0.0835562	0.677672	0.0841412	0.739059	0.0911698
1st free col	55	0.656606	0.083071	0.543419	0.0706749	0.574169	0.0740035	0.605531	0.0773425	0.637518	0.0806918	0.670143	0.0840515	0.703417	0.0874217	0.737355	0.0908024	0.771968	0.0941935	0.555459	0.072062	0.555459	0.0719329	0.604365	0.0773023			0.731129	0.0919445	0.662189	0.0823738	0.66533	0.0838258	0.689422	0.0854872	0.659847	0.0826822	0.680859	0.0848433	0.677262	0.0839241	0.630872	0.0790271	0.668859	0.0837257	0.6745	0.084337	0.73597	0.091387
Sigma Level	2	0.638338	0.0807448	0.543316	0.0706915	0.574059	0.0740209	0.605415	0.0773606	0.637395	0.0807108	0.670011	0.0840713	0.703278	0.0874423	0.737208	0.0908238	0.771813	0.0942158	0.563247	0.0729056	0.563247	0.072775	0.636279	0.0806498			0.727316	0.0920371	0.657968	0.0825172	0.662199	0.0838583	0.684495	0.0856522	0.656612	0.0827659	0.676201	0.0849734	0.672341	0.0840865	0.62739	0.0791031	0.66527	0.0838093	0.67024	0.084428	0.731819	0.091529
Absolute Errs	FALSE	0.649881	0.0821647	0.543178	0.070706	0.573912	0.0740361	0.605258	0.0773765	0.637228	0.0807274	0.669835	0.0840887	0.703091	0.0874604	0.737009	0.0908426	0.771603	0.0942354	0.571073	0.07375	0.571073	0.0736177	0.668829	0.0840077			0.722676	0.0920357	0.652828	0.0825769	0.658391	0.083803	0.678496	0.085718	0.652674	0.0827719	0.670532	0.0849955	0.66635	0.0841482	0.623154	0.0790911	0.660902	0.0838037	0.665057	0.0844107	0.726764	0.0915902
Symbol Type	1	0.64449	0.0814669	0.543009	0.0707179	0.573732	0.0740485	0.605066	0.0773896	0.637024	0.080741	0.669619	0.0841029	0.702863	0.0874752	0.736768	0.090858	0.771348	0.0942514	0.578939	0.0745949	0.578939	0.0744612	0.702025	0.087376			0.717386	0.0919402	0.646967	0.0825506	0.654052	0.0836619	0.671656	0.085682	0.648186	0.0827	0.664069	0.0849089	0.659518	0.0841068	0.618326	0.0789914	0.655924	0.0837092	0.659149	0.0842857	0.721	0.0915683
Inverse Plot	FALSE	0.607744	0.0768107	0.542817	0.0707267	0.573527	0.0740578	0.604848	0.0773993	0.636793	0.0807512	0.669373	0.0841135	0.702602	0.0874863	0.736492	0.0908695	0.771057	0.0942633	0.586844	0.0754406	0.586844	0.0753052	0.735883	0.0907549			0.711651	0.0917544	0.64061	0.0824394	0.649348	0.0834405	0.664238	0.0855458	0.643319	0.0825529	0.657061	0.0847168	0.652109	0.083964	0.61309	0.0788079	0.650526	0.0835293	0.652743	0.0840579	0.714748	0.0914642
Color Plot	TRUE	0.645009	0.0814888	0.542608	0.0707321	0.573304	0.0740635	0.604611	0.0774053	0.636541	0.0807574	0.669106	0.08412	0.702319	0.087493	0.736193	0.0908766	0.770742	0.0942706	0.594789	0.0762869	0.594789	0.07615	0.770413	0.0941442			0.705691	0.0914854	0.634002	0.0822476	0.64446	0.0831472	0.656526	0.0853144	0.63826	0.0823364	0.649777	0.0844266	0.644407	0.0837253	0.60765	0.0785477	0.644916	0.083271	0.646087	0.083736	0.708249	0.0912818
3D plot	FALSE	0.646203	0.0816096	0.542391	0.070734	0.573073	0.0740655	0.604365	0.0774073	0.636279	0.0807595	0.668829	0.0841222	0.702025	0.0874953	0.735883	0.090879	0.770413	0.0942731	0.602774	0.0771339	0.602774	0.0769954	IsoLine	IsoLine			0.699734	0.0911435	0.627396	0.0819824	0.639576	0.0827933	0.648817	0.0849968	0.633205	0.0820587	0.642497	0.0840495	0.636708	0.0833997	0.602213	0.0782207	0.63931	0.0829442	0.639434	0.0833324	0.701752	0.0910282
Linear	FALSE	0.708311	0.0894283	0.542174	0.0707321	0.572842	0.0740635	0.604119	0.0774053	0.636018	0.0807574	0.668551	0.08412	0.701732	0.087493	0.735572	0.0908766	0.770085	0.0942706	0.610798	0.0779815	0.610798	0.0778415					0.69401	0.0907419	0.621047	0.0816541	0.634884	0.0823924	0.641408	0.0846052	0.628346	0.0817305	0.635501	0.0836	0.629309	0.0829999	0.596988	0.0778395	0.633922	0.0825615	0.633042	0.0828625	0.695507	0.0907132
Data Range	C13:G25	0.635254	0.0802006	0.541966	0.0707267	0.572619	0.0740578	0.603882	0.0773993	0.635766	0.0807512	0.668284	0.0841135	0.701449	0.0874863	0.735273	0.0908695	0.769769	0.0942633	0.618863	0.0788299	0.618863	0.0786882					0.688739	0.090296	0.615198	0.0812754	0.630564	0.08196	0.634583	0.0841547	0.623872	0.0813644	0.629057	0.0830953	0.622492	0.0825412	0.592177	0.0774188	0.628961	0.0821376	0.627155	0.0823445	0.689754	0.0903487
Filled Symbols	TRUE	0.65158	0.0822481	0.541773	0.0707179	0.572414	0.0740485	0.603664	0.0773896	0.635534	0.080741	0.668038	0.0841029	0.701188	0.0874752	0.734997	0.090858	0.769478	0.0942514	0.626968	0.0796788	0.626968	0.0795356					0.684122	0.0898229	0.610074	0.0808607	0.626782	0.0815126	0.628604	0.0836625	0.619954	0.0809746	0.623414	0.0825549	0.616521	0.0820412	0.587964	0.0769747	0.624617	0.0816887	0.622001	0.0817983	0.684715	0.0899489
ConcAge	FALSE	IsoLine	IsoLine	0.541605	0.070706	0.572234	0.0740361	0.603472	0.0773765	0.635331	0.0807274	0.667823	0.0840887	0.70096	0.0874604	0.734756	0.0908426	0.769223	0.0942354	0.635114	0.0805285	0.635114	0.0803837					0.680339	0.0893409	0.605872	0.080426	0.623684	0.0810674	0.623701	0.0831475	0.616742	0.0805759	0.618788	0.0819995	0.611625	0.0815191	0.584511	0.0765244	0.621056	0.0812322	0.617776	0.0812448	0.680582	0.0895291
ConcSwap	FALSE			0.541466	0.0706915	0.572087	0.0740209	0.603315	0.0773606	0.635164	0.0807108	0.667646	0.0840713	0.700773	0.0874423	0.734558	0.0908238	0.769014	0.0942158	0.6433	0.0813788	0.6433	0.0812324					0.677533	0.0888684	0.602754	0.0799879	0.621387	0.0806416	0.620063	0.0826297	0.61436	0.0801836	0.615356	0.0814504	0.607992	0.080995	0.581951	0.076085	0.618415	0.0807855	0.614644	0.0807054	0.677515	0.0891054
1st Symbol-row	1			0.541363	0.0706749	0.571977	0.0740035	0.603199	0.0773425	0.63504	0.0806918	0.667514	0.0840515	0.700634	0.0874217	0.73441	0.0908024	0.768858	0.0941935	0.651528	0.0822298	0.651528	0.0820818					0.675813	0.0884236	0.60084	0.0795635	0.619982	0.0802515	0.617829	0.0821288	0.612899	0.079813	0.613252	0.0809287	0.605761	0.080489	0.580382	0.0756735	0.616797	0.0803658	0.612725	0.0802007	0.675631	0.0886941
				0.5413	0.070657	0.57191	0.0739847	0.603127	0.0773227	0.634964	0.0806712	0.667434	0.08403	0.700548	0.0873993	0.73432	0.0907791	0.768762	0.0941693	0.659796	0.0830815	0.659796	0.0829319					0.675245	0.0880236	0.600202	0.0791688	0.619521	0.0799121	0.617085	0.0816641	0.612416	0.0794782	0.612555	0.0804546	0.605019	0.0800206	0.579865	0.0753057	0.616263	0.0799893	0.612092	0.0797501	0.675003	0.088311
				0.541279	0.0706383	0.571887	0.0739651	0.603103	0.0773023	0.634938	0.0806498	0.667406	0.0840077	0.700519	0.087376	0.734289	0.0907549	0.76873	0.0941442	0.668106	0.0839338	0.668106	0.0837826					0.675851	0.0876838	0.600865	0.0788192	0.620023	0.0796364	0.61786	0.0812535	0.61293	0.079192	0.613292	0.0800462	0.605794	0.0796078	0.580419	0.0749957	0.616833	0.0796704	0.61277	0.079371	0.675655	0.0879709
				0.5413	0.0706196	0.57191	0.0739455	0.603127	0.0772818	0.634964	0.0806284	0.667434	0.0839854	0.700548	0.0873528	0.73432	0.0907307	0.768762	0.094119	0.676458	0.0847868	0.676458	0.084634					0.677608	0.0874172	0.602805	0.0785281	0.621467	0.0794351	0.620124	0.0809127	0.614419	0.0789655	0.615436	0.0797192	0.608055	0.0792664	0.582023	0.0747555	0.618486	0.0794214	0.614733	0.0790779	0.677563	0.0876868
				0.541363	0.0706017	0.571977	0.0739267	0.603199	0.0772621	0.63504	0.0806078	0.667514	0.0839639	0.700634	0.0873304	0.73441	0.0907074	0.768858	0.0940949	0.684852	0.0856405	0.684852	0.0854861					0.680447	0.087234	0.605946	0.0783065	0.6238	0.0793159	0.62379	0.0806549	0.616828	0.0788074	0.618903	0.0794862	0.611717	0.0790096	0.584615	0.0745943	0.621159	0.0792519	0.617905	0.0788821	0.680651	0.0874696
				0.541466	0.0705851	0.572087	0.0739093	0.603315	0.0772439	0.635164	0.0805888	0.667646	0.0839441	0.700773	0.0873098	0.734558	0.0906859	0.769014	0.0940726	0.693287	0.0864948	0.693287	0.0863388					0.68426	0.0871414	0.610167	0.0781632	0.62693	0.0792833	0.628717	0.0804899	0.620064	0.0787237	0.623561	0.0793561	0.616638	0.0788473	0.588097	0.0745182	0.624748	0.0791683	0.622165	0.0787911	0.684803	0.0873276
				0.541605	0.0705706	0.572234	0.0738941	0.603472	0.077228	0.635331	0.0805722	0.667823	0.0839267	0.70096	0.0872917	0.734756	0.0906671	0.769223	0.094053	0.701765	0.0873498	0.701765	0.0871922					0.6889	0.0871429	0.615308	0.0781035	0.630738	0.0793386	0.634716	0.0804241	0.624001	0.0787177	0.62923	0.0793339	0.62263	0.0787856	0.592333	0.0745303	0.629116	0.0791739	0.627348	0.0788084	0.689858	0.0872664
				0.541773	0.0705587	0.572414	0.0738817	0.603664	0.0772149	0.635534	0.0805585	0.668038	0.0839125	0.701188	0.0872769	0.734997	0.0906517	0.769478	0.094037	0.710285	0.0882055	0.710285	0.0880463					0.69419	0.0872383	0.621169	0.0781297	0.635077	0.0794797	0.641556	0.08046	0.62849	0.0787897	0.635693	0.0794206	0.629461	0.0788269	0.597162	0.07463	0.634094	0.0792684	0.633256	0.0789334	0.695622	0.0872883
				0.541966	0.0705499	0.572619	0.0738724	0.603882	0.0772052	0.635766	0.0805484	0.668284	0.0839019	0.701449	0.0872658	0.735273	0.0906402	0.769769	0.0940251	0.718848	0.0890619	0.718848	0.0889011					0.699925	0.0874241	0.627525	0.0782409	0.639781	0.0797012	0.648974	0.0805963	0.633357	0.0789367	0.642701	0.0796127	0.636871	0.0789697	0.602397	0.0748134	0.639492	0.0794483	0.639662	0.0791612	0.701874	0.0873924
				0.542174	0.0705444	0.572842	0.0738667	0.604119	0.0771992	0.636018	0.0805421	0.668551	0.0838954	0.701732	0.0872591	0.735572	0.0906332	0.770085	0.0940178	0.727453	0.0899189	0.727453	0.0897565					0.705885	0.0876932	0.634134	0.0784328	0.644669	0.0799945	0.656686	0.0808277	0.638416	0.0791532	0.649985	0.0799028	0.644572	0.0792084	0.607837	0.0750737	0.645102	0.0797066	0.646318	0.0794832	0.708373	0.0875748
				0.542391	0.0705426	0.573073	0.0738647	0.604365	0.0771972	0.636279	0.08054	0.668829	0.0838932	0.702025	0.0872568	0.735883	0.0906308	0.770413	0.0940153	0.736102	0.0907766	0.736102	0.0906126					0.711842	0.088035	0.640739	0.0786979	0.649553	0.0803484	0.664394	0.0811453	0.643471	0.0794309	0.657265	0.0802799	0.652271	0.079534	0.613274	0.0754006	0.650708	0.0800333	0.652971	0.0798868	0.71487	0.0878284
				0.542608	0.0705444	0.573304	0.0738667	0.604611	0.0771992	0.636541	0.0805421	0.669106	0.0838954	0.702319	0.0872591	0.736193	0.0906332	0.770742	0.0940178	0.744794	0.091635	0.744794	0.0914694					0.717566	0.0884366	0.647088	0.0790262	0.654245	0.0807492	0.671804	0.0815369	0.648329	0.0797591	0.664261	0.0807294	0.659671	0.0799338	0.618499	0.0757818	0.656096	0.0804161	0.659363	0.0803566	0.721114	0.0881434
				0.542817	0.0705499	0.573527	0.0738724	0.604848	0.0772052	0.636793	0.0805484	0.669373	0.0839019	0.702602	0.0872658	0.736492	0.0906402	0.771057	0.0940251	0.75353	0.0924941	0.75353	0.0923268					0.722837	0.0888825	0.652937	0.079405	0.658565	0.0811817	0.678629	0.0819874	0.652804	0.0801252	0.670704	0.0812341	0.666487	0.0803925	0.62331	0.0762025	0.661057	0.08084	0.66525	0.0808746	0.726867	0.0885079
				0.543009	0.0705587	0.573732	0.0738817	0.605066	0.0772149	0.637024	0.0805585	0.669619	0.0839125	0.702863	0.0872769	0.736768	0.0906517	0.771348	0.094037	0.762309	0.0933538	0.762309	0.0931849					0.727454	0.0893556	0.658061	0.0798197	0.662347	0.0816291	0.684608	0.0824796	0.656722	0.0805151	0.676348	0.0817746	0.672458	0.0808926	0.627523	0.0766466	0.665401	0.0812889	0.670404	0.0814208	0.731907	0.0889077
				0.543178	0.0705706	0.573912	0.0738941	0.605258	0.077228	0.637228	0.0805722	0.669835	0.0839267	0.703091	0.0872917	0.737009	0.0906671	0.771603	0.094053	0.771133	0.0942142	0.771133	0.0940437					0.731237	0.0898376	0.662263	0.0802544	0.665446	0.0820742	0.689511	0.0829945	0.659934	0.0809138	0.680974	0.08233	0.677354	0.0814147	0.630976	0.077097	0.668962	0.0817454	0.674629	0.0819743	0.73604	0.0893275
				0.543316	0.0705851	0.574059	0.0739093	0.605415	0.0772439	0.637395	0.0805888	0.670011	0.0839441	0.703278	0.0873098	0.737208	0.0906859	0.771813	0.0940726	0.78	0.0950753	0.78	0.0949032					0.734043	0.0903101	0.665381	0.0806924	0.667742	0.0825	0.693149	0.0835124	0.662316	0.081306	0.684405	0.0828791	0.680987	0.0819388	0.633536	0.0775364	0.671603	0.0821921	0.677761	0.0825138	0.739107	0.0897512
				0.543419	0.0706017	0.574169	0.0739267	0.605531	0.0772621	0.637518	0.0806078	0.670143	0.0839639	0.703417	0.0873304	0.737355	0.0907074	0.771968	0.0940949	0.78	0.0950753	0.78	0.0949032					0.735763	0.0907549	0.667296	0.0811169	0.669147	0.0828901	0.695383	0.0840133	0.663776	0.0816766	0.68651	0.0834007	0.683218	0.0824447	0.635105	0.0779479	0.673221	0.0826118	0.67968	0.0830185	0.74099	0.0901625
				0.543482	0.0706196	0.574236	0.0739455	0.605603	0.0772818	0.637595	0.0806284	0.670224	0.0839854	0.703503	0.0873528	0.737446	0.0907307	0.772064	0.094119	IsoLine	IsoLine	0.78	0.0952474					0.736331	0.0911549	0.667933	0.0815115	0.669608	0.0832295	0.696127	0.084478	0.664259	0.0820115	0.687207	0.0838749	0.68396	0.0829131	0.635622	0.0783157	0.673755	0.0829883	0.680313	0.0834691	0.741618	0.0905456
				0.543504	0.0706383	0.574259	0.0739651	0.605627	0.0773023	0.637621	0.0806498	0.670251	0.0840077	0.703532	0.087376	0.737476	0.0907549	0.772097	0.0941442			0.78	0.0952474					ErrEll	ErrEll	ErrEll	ErrEll	ErrEll	ErrEll	ErrEll	ErrEll	ErrEll	ErrEll	ErrEll	ErrEll	ErrEll	ErrEll	ErrEll	ErrEll	ErrEll	ErrEll	ErrEll	ErrEll	ErrEll	ErrEll
				ConcTikEll	ConcTikEll	ConcTikEll	ConcTikEll	ConcTikEll	ConcTikEll	ConcTikEll	ConcTikEll	ConcTikEll	ConcTikEll	ConcTikEll	ConcTikEll	ConcTikEll	ConcTikEll	ConcTikEll	ConcTikEll			0.771133	0.0943847
																						0.762309	0.0935226
																						0.75353	0.0926613
																						0.744794	0.0918006
																						0.736102	0.0909406
																						0.727453	0.0900813
																						0.718848	0.0892227
																						0.710285	0.0883647
																						0.701765	0.0875074
																						0.693287	0.0866508
																						0.684852	0.0857948
																						0.676458	0.0849396
																						0.668106	0.084085
																						0.659796	0.083231
																						0.651528	0.0823778
																						0.6433	0.0815252
																						0.635114	0.0806733
																						0.626968	0.0798221
																						0.618863	0.0789715
																						0.610798	0.0781216
																						0.602774	0.0772724
																						0.594789	0.0764238
																						0.586844	0.075576
																						0.578939	0.0747287
																						0.571073	0.0738822
																						0.563247	0.0730363
																						0.555459	0.0721911
																						0.54771	0.0713465
																						0.54	0.0705026
																						0.54	0.0705026
																						0.54	0.0702507
																						ConcBand	ConcBand
[truncated: 6 more columns]

## Sheet: PlotDat2
Source sheet	all data	0.679016	0.0846467	300		350		400		450		500		550		600		0.3	0.0421911	0.3	0.0421166	0.279171	0.0395431	0.321435	0.04	0.71313	0.0859339	0.712771	0.0871177	0.668162	0.0825648	0.680923	0.0821976	0.658937	0.0794657	0.691545	0.0840249	0.691203	0.0843839	0.725108	0.0886479	0.650965	0.0795137	0.721247	0.0862998	0.740905	0.0889003	0.689679	0.0848388
Plot name	Concordia0	0.686172	0.0855361	0.344398	0.0476374	0.412373	0.0557947	0.483784	0.0640155	0.558806	0.0723004	0.637621	0.0806498	0.72042	0.0890642	0.807407	0.097544	0.3	0.0421911	0.3	0.0421166	0.343738	0.0476374	0.803588	0.1	0.71246	0.0862894	0.712241	0.0874092	0.667758	0.0827502	0.680332	0.0825083	0.658318	0.0797978	0.690981	0.0843352	0.690658	0.0846825	0.724556	0.0889485	0.650442	0.0797977	0.720506	0.0866766	0.740101	0.0893346	0.689212	0.0850716
Plot Type	1	0.648148	0.0807923	0.344386	0.0476498	0.412357	0.0558093	0.483765	0.0640324	0.558784	0.0723195	0.637595	0.0806712	0.720391	0.0890879	0.807373	0.0975701	0.315455	0.044133	0.315455	0.044055	0.411563	0.0557947			0.710505	0.0865818	0.710709	0.0876287	0.6666	0.0828605	0.678606	0.0827653	0.656514	0.0800687	0.689345	0.0845799	0.689086	0.0849059	0.722964	0.0891703	0.648934	0.0800059	0.718335	0.086993	0.73776	0.0896866	0.687874	0.0852242
1st free col	97	0.650782	0.0811109	0.344348	0.0476618	0.412311	0.0558234	0.48371	0.0640486	0.558718	0.0723379	0.637518	0.0806918	0.720302	0.0891107	0.807272	0.0975952	0.331094	0.0460785	0.331094	0.045997	0.482812	0.0640155			0.70734	0.0867999	0.708234	0.0877678	0.664733	0.0828912	0.67581	0.0829587	0.653595	0.0802679	0.6867	0.0847495	0.686546	0.0850456	0.720394	0.0893048	0.646499	0.0801305	0.714818	0.0872369	0.733972	0.0899428	0.685715	0.0852909
Sigma Level	2	0.627484	0.0782044	0.344287	0.0476728	0.412236	0.0558364	0.48362	0.0640636	0.558612	0.0723549	0.637395	0.0807108	0.720159	0.0891318	0.807107	0.0976184	0.346919	0.0480277	0.346919	0.0479426	0.557657	0.0723004			0.703086	0.0869351	0.704911	0.0878212	0.662229	0.0828413	0.672052	0.0830811	0.649673	0.0803879	0.683146	0.0848376	0.683136	0.0850962	0.716943	0.0893468	0.64323	0.0801666	0.71009	0.087399	0.728881	0.0900933	0.682818	0.0852691
Absolute Errs	FALSE	0.663076	0.0826277	0.344205	0.0476825	0.412136	0.0558478	0.483499	0.0640767	0.558469	0.0723697	0.637228	0.0807274	0.719967	0.0891502	0.806887	0.0976386	0.362932	0.0499804	0.362932	0.0498918	0.636279	0.0806498			0.697908	0.0869825	0.700868	0.0877867	0.659184	0.0827127	0.667477	0.0831277	0.644897	0.0804239	0.678822	0.0848408	0.678987	0.0850558	0.712745	0.0892946	0.639253	0.0801128	0.704334	0.0874731	0.722685	0.0901325	0.679295	0.0851595
Symbol Type	1	0.663909	0.0827272	0.344105	0.0476905	0.412013	0.0558571	0.483352	0.0640874	0.558295	0.0723819	0.637024	0.080741	0.719732	0.0891653	0.806617	0.0976553	0.379135	0.0519368	0.379135	0.0518447	0.718871	0.0890642			0.692003	0.0869401	0.69626	0.0876658	0.655715	0.0825102	0.66226	0.0830969	0.639453	0.0803747	0.673892	0.084759	0.674259	0.0849258	0.707961	0.0891504	0.634721	0.0799711	0.697769	0.0874562	0.71562	0.0900587	0.675281	0.0849665
Inverse Plot	FALSE	0.697494	0.086898	0.343991	0.0476964	0.411873	0.055864	0.483184	0.0640954	0.558096	0.072391	0.636793	0.0807512	0.719464	0.0891766	0.80631	0.0976676	0.395531	0.0538969	0.395531	0.0538011	0.805631	0.097544			0.685599	0.0868095	0.691265	0.087463	0.651955	0.0822417	0.656602	0.0829898	0.633549	0.080242	0.668546	0.0845952	0.669133	0.0847114	0.702775	0.0889196	0.629808	0.0797471	0.690649	0.087349	0.707959	0.0898748	0.67093	0.0846974
Color Plot	TRUE	0.624807	0.0778277	0.343867	0.0477	0.411721	0.0558683	0.483001	0.0641003	0.557881	0.0723965	0.636541	0.0807574	0.719173	0.0891835	0.805977	0.0976753	0.412122	0.0558606	0.412122	0.0557613	IsoLine	IsoLine			0.678943	0.0865958	0.686074	0.0871861	0.648048	0.0819176	0.650721	0.0828104	0.627411	0.080031	0.662991	0.0843558	0.663806	0.0844207	0.697386	0.0886112	0.624702	0.0794494	0.683247	0.0871557	0.699996	0.0895879	0.66641	0.0843626
3D plot	FALSE	0.683311	0.0851073	0.343738	0.0477012	0.411563	0.0558698	0.482812	0.064102	0.557657	0.0723984	0.636279	0.0807595	0.718871	0.0891858	0.805631	0.0976778	0.42891	0.057828	0.42891	0.057725					0.672289	0.0863073	0.680886	0.0868459	0.644145	0.0815502	0.644842	0.0825658	0.621277	0.0797499	0.657438	0.08405	0.658483	0.084065	0.692001	0.0882369	0.619601	0.0790893	0.675847	0.0868837	0.692036	0.089209	0.661894	0.083975
Linear	FALSE	0.700096	0.0871939	0.343609	0.0477	0.411405	0.0558683	0.482622	0.0641003	0.557432	0.0723965	0.636018	0.0807574	0.718568	0.0891835	0.805284	0.0976753	0.445898	0.059799	0.445898	0.0596925					0.665894	0.0859549	0.675902	0.0864553	0.640397	0.0811536	0.639191	0.0822652	0.615381	0.0794093	0.652103	0.0836896	0.653369	0.0836578	0.686827	0.0878111	0.6147	0.0786807	0.668735	0.0865434	0.684386	0.0887527	0.657556	0.0835493
Data Range	C26:G60	0.66652	0.0829872	0.343485	0.0476964	0.411253	0.055864	0.48244	0.0640954	0.557217	0.072391	0.635766	0.0807512	0.718278	0.0891766	0.804951	0.0976676	0.463088	0.0617737	0.463088	0.0616636					0.660003	0.0855522	0.671312	0.0860294	0.636946	0.0807432	0.633986	0.0819203	0.60995	0.0790225	0.647189	0.0832884	0.648659	0.0832149	0.682063	0.0873503	0.610187	0.0782394	0.662182	0.0861479	0.67734	0.0882364	0.653562	0.0831021
Filled Symbols	TRUE	0.640871	0.0797906	0.34337	0.0476905	0.411113	0.0558571	0.482271	0.0640874	0.557018	0.0723819	0.635534	0.080741	0.71801	0.0891653	0.804644	0.0976553	0.480482	0.0637521	0.480482	0.0636383					0.654843	0.0851148	0.667294	0.0855845	0.633925	0.0803347	0.629426	0.0815442	0.605193	0.0786042	0.642885	0.0828617	0.644536	0.0827532	0.677892	0.086872	0.606236	0.0777822	0.656441	0.0857125	0.671168	0.0876801	0.650067	0.0826505
ConcAge	FALSE	0.442692	0.0551139	0.34327	0.0476825	0.41099	0.0558478	0.482124	0.0640767	0.556844	0.0723697	0.635331	0.0807274	0.717775	0.0891502	0.804375	0.0976386	0.498083	0.0657341	0.498083	0.0656167					0.650611	0.0846593	0.664	0.0851378	0.631451	0.0799437	0.625687	0.0811515	0.601292	0.0781705	0.639357	0.0824261	0.641157	0.0822905	0.674474	0.0863948	0.602999	0.0773268	0.651733	0.0852537	0.666108	0.0871051	0.647203	0.0822118
ConcSwap	FALSE	0.640361	0.0797082	0.343188	0.0476728	0.410889	0.0558364	0.482003	0.0640636	0.556701	0.0723549	0.635164	0.0807108	0.717582	0.0891318	0.804154	0.0976184	0.515893	0.0677199	0.515893	0.0675988					0.647472	0.0842034	0.661559	0.0847063	0.629619	0.0795854	0.622912	0.0807573	0.598399	0.0777382	0.636741	0.0819982	0.638653	0.0818446	0.671941	0.0859369	0.6006	0.0768906	0.648239	0.0847894	0.662354	0.0865335	0.645082	0.0818029
1st Symbol-row	1	0.69859	0.0869546	0.343127	0.0476618	0.410815	0.0558234	0.481913	0.0640486	0.556595	0.0723379	0.63504	0.0806918	0.717439	0.0891107	0.80399	0.0975952	0.533915	0.0697094	0.533915	0.0695846					0.645544	0.0837645	0.660064	0.0843068	0.628499	0.0792734	0.621209	0.0803766	0.596622	0.0773238	0.635137	0.0815945	0.637119	0.0814326	0.67039	0.085516	0.599131	0.0764905	0.646092	0.0843372	0.660051	0.0859873	0.643785	0.0814395
		0.691533	0.0860719	0.34309	0.0476498	0.410769	0.0558093	0.481858	0.0640324	0.55653	0.0723195	0.634964	0.0806712	0.717351	0.0890879	0.803889	0.0975701	0.552151	0.0717025	0.552151	0.0715741					0.644903	0.0833595	0.659572	0.0839545	0.628134	0.0790198	0.620641	0.0800242	0.596032	0.0769432	0.634607	0.0812306	0.636615	0.0810704	0.669881	0.0851481	0.598648	0.0761417	0.645376	0.0839147	0.659286	0.0854875	0.643361	0.0811356
		0.663055	0.0825168	0.343077	0.0476374	0.410753	0.0557947	0.481839	0.0640155	0.556508	0.0723004	0.634938	0.0806498	0.717321	0.0890642	0.803855	0.097544	0.570604	0.0736994	0.570604	0.0735673					0.645573	0.083004	0.660102	0.083663	0.628538	0.0788343	0.621232	0.0797135	0.596651	0.076611	0.63517	0.0809203	0.637159	0.0807718	0.670433	0.0848475	0.599171	0.0758577	0.646117	0.083538	0.66009	0.0850532	0.643828	0.0809029
		0.658105	0.0818975	0.34309	0.0476249	0.410769	0.0557801	0.481858	0.0639987	0.55653	0.0722813	0.634964	0.0806284	0.717351	0.0890404	0.803889	0.0975179	0.589276	0.0757	0.589276	0.0755642					0.647528	0.0827116	0.661634	0.0834434	0.629695	0.0787241	0.622959	0.0794565	0.598455	0.0763401	0.636806	0.0806756	0.638732	0.0805484	0.672024	0.0846258	0.60068	0.0756494	0.648288	0.0832216	0.662431	0.0847012	0.645166	0.0807502
		0.640464	0.0796982	0.343127	0.0476129	0.410815	0.055766	0.481913	0.0639825	0.556595	0.0722629	0.63504	0.0806078	0.717439	0.0890176	0.80399	0.0974929	0.60817	0.0777043	0.60817	0.0775648					0.650693	0.0824935	0.664109	0.0833043	0.631562	0.0786934	0.625755	0.0792631	0.601374	0.0761409	0.639452	0.080506	0.641272	0.0804087	0.674595	0.0844913	0.603115	0.0755249	0.651805	0.0829776	0.666219	0.084445	0.647325	0.0806835
		0.620106	0.0771594	0.343188	0.0476019	0.410889	0.055753	0.482003	0.0639675	0.556701	0.0722459	0.635164	0.0805888	0.717582	0.0889965	0.804154	0.0974697	0.627289	0.0797124	0.627289	0.0795691					0.654947	0.0823582	0.667432	0.083251	0.634066	0.0787433	0.629513	0.0791407	0.605296	0.076021	0.643005	0.0804179	0.644682	0.0803581	0.678045	0.0844493	0.606384	0.0754888	0.656532	0.0828155	0.67131	0.0842944	0.650222	0.0807054
		0.689076	0.0857346	0.34327	0.0475922	0.41099	0.0557416	0.482124	0.0639544	0.556844	0.0722311	0.635331	0.0805722	0.717775	0.0889781	0.804375	0.0974495	0.646636	0.0817242	0.646636	0.0815772					0.660125	0.0823109	0.671475	0.0832854	0.637111	0.0788719	0.634088	0.079094	0.610072	0.0759849	0.64733	0.0804147	0.64883	0.0803986	0.682243	0.0845014	0.610361	0.0755426	0.662289	0.0827415	0.677506	0.0842553	0.653745	0.0808149
		0.669427	0.0832828	0.34337	0.0475843	0.411113	0.0557323	0.482271	0.0639437	0.557018	0.0722189	0.635534	0.0805585	0.71801	0.088963	0.804644	0.0974328	0.666212	0.0837398	0.666212	0.083589					0.66603	0.0823533	0.676083	0.0834064	0.640581	0.0790744	0.639304	0.0791248	0.615516	0.0760342	0.652259	0.0804965	0.653559	0.0805285	0.687027	0.0846457	0.614893	0.0756842	0.668854	0.0827584	0.684571	0.0843291	0.657759	0.0810079
		0.69097	0.0859404	0.343485	0.0475784	0.411253	0.0557253	0.48244	0.0639357	0.557217	0.0722098	0.635766	0.0805484	0.718278	0.0889517	0.804951	0.0974205	0.686021	0.0857591	0.686021	0.0856045					0.672433	0.0824839	0.681079	0.0836092	0.644341	0.0793428	0.644962	0.079232	0.62142	0.0761668	0.657605	0.0806603	0.658685	0.0807429	0.692214	0.0848764	0.619806	0.0759082	0.675974	0.0828655	0.692232	0.084513	0.66211	0.081277
		0.661339	0.0822527	0.343609	0.0475747	0.411405	0.0557211	0.482622	0.0639307	0.557432	0.0722043	0.636018	0.0805421	0.718568	0.0889448	0.805284	0.0974128	0.706065	0.0877822	0.706065	0.0876238					0.67909	0.0826975	0.68627	0.083886	0.648247	0.079667	0.650844	0.0794113	0.627558	0.0763778	0.66316	0.0808997	0.664012	0.0810336	0.697603	0.0851849	0.624911	0.076206	0.683376	0.0830588	0.700196	0.0847999	0.66663	0.0816118
		0.717562	0.0892271	0.343738	0.0475735	0.411563	0.0557196	0.482812	0.0639291	0.557657	0.0722024	0.636279	0.08054	0.718871	0.0889425	0.805631	0.0974103	0.726348	0.089809	0.726348	0.0896468					0.685744	0.0829861	0.691457	0.0842263	0.65215	0.0800344	0.656723	0.079656	0.633692	0.0766589	0.668713	0.0812054	0.669334	0.0813894	0.702988	0.0855592	0.630013	0.0765661	0.690775	0.0833308	0.708155	0.0851788	0.671146	0.0819995
		0.668474	0.0831103	0.343867	0.0475747	0.411721	0.0557211	0.483001	0.0639307	0.557881	0.0722043	0.636541	0.0805421	0.719173	0.0889448	0.805977	0.0974128	0.746872	0.0918396	0.746872	0.0916736					0.692139	0.0833385	0.696442	0.0846169	0.655899	0.0804309	0.662373	0.0799566	0.639588	0.0769995	0.674049	0.0815659	0.674449	0.0817965	0.708162	0.085985	0.634914	0.0769746	0.697888	0.0836711	0.715805	0.0856351	0.675484	0.0824251
		0.636834	0.0791624	0.343991	0.0475784	0.411873	0.0557253	0.483184	0.0639357	0.558096	0.0722098	0.636793	0.0805484	0.719464	0.0889517	0.80631	0.0974205	0.76764	0.093874	0.76764	0.0937042					0.69803	0.0837412	0.701031	0.0850428	0.65935	0.0808414	0.667579	0.0803015	0.645019	0.0773863	0.678963	0.0819671	0.679158	0.0822395	0.712926	0.0864458	0.639427	0.077416	0.704441	0.0840666	0.722851	0.0861514	0.679478	0.0828723
		0.70471	0.0875954	0.344105	0.0475843	0.412013	0.0557323	0.483352	0.0639437	0.558295	0.0722189	0.637024	0.0805585	0.719732	0.088963	0.806617	0.0974328	0.788654	0.0959122	0.788654	0.0957385					0.70319	0.0841786	0.70505	0.0854877	0.66237	0.0812499	0.672139	0.0806775	0.649776	0.0778046	0.683266	0.0823937	0.683281	0.0827012	0.717097	0.086924	0.643378	0.0778732	0.710182	0.0845021	0.729023	0.0867077	0.682974	0.083324
		0.650393	0.0808423	0.344205	0.0475922	0.412136	0.0557416	0.483499	0.0639544	0.558469	0.0722311	0.637228	0.0805722	0.719967	0.0889781	0.806887	0.0974495	0.809919	0.0979542	0.809919	0.0977767					0.707421	0.0846341	0.708343	0.0859344	0.664844	0.0816409	0.675878	0.0810702	0.653677	0.0782383	0.686794	0.0828294	0.68666	0.0831638	0.720514	0.0874013	0.646615	0.0783286	0.71489	0.0849608	0.734083	0.0872827	0.685837	0.0837627
		0.618714	0.0768802	0.344287	0.0476019	0.412236	0.055753	0.48362	0.0639675	0.558612	0.0722459	0.637395	0.0805888	0.720159	0.0889965	0.807107	0.0974697	0.831436	0.1	0.831436	0.0998186					0.710561	0.08509	0.710784	0.0863658	0.666676	0.0819992	0.678652	0.0814645	0.65657	0.0786706	0.68941	0.0832572	0.689165	0.0836097	0.723047	0.0878592	0.649014	0.0787647	0.718384	0.0854252	0.737837	0.0878542	0.687958	0.0841716
		0.696904	0.0865796	0.344348	0.0476129	0.412311	0.055766	0.48371	0.0639825	0.558718	0.0722629	0.637518	0.0806078	0.720302	0.0890176	0.807272	0.0974929	0.831436	0.1	0.833367	0.1					0.712489	0.0855289	0.712279	0.0867654	0.667797	0.0823112	0.680356	0.0818451	0.658346	0.0790851	0.691014	0.0836609	0.690699	0.0840217	0.724598	0.0882801	0.650483	0.0791649	0.720531	0.0858773	0.74014	0.0884005	0.689255	0.0845349
		0.702561	0.0872807	0.344386	0.0476249	0.412357	0.0557801	0.483765	0.0639987	0.558784	0.0722813	0.637595	0.0806284	0.720391	0.0890404	0.807373	0.0975179	IsoLine	IsoLine	0.829532	0.1					0.71313	0.0859339	0.712771	0.0871177	0.668162	0.0825648	0.680923	0.0821976	0.658937	0.0794657	0.691545	0.0840249	0.691203	0.0843839	0.725108	0.0886479	0.650965	0.0795137	0.721247	0.0862998	0.740905	0.0889003	0.689679	0.0848388
		0.694912	0.0862535	0.344398	0.0476374	0.412373	0.0557947	0.483784	0.0640155	0.558806	0.0723004	0.637621	0.0806498	0.72042	0.0890642	0.807407	0.097544			0.809919	0.0981318					ErrEll	ErrEll	ErrEll	ErrEll	ErrEll	ErrEll	ErrEll	ErrEll	ErrEll	ErrEll	ErrEll	ErrEll	ErrEll	ErrEll	ErrEll	ErrEll	ErrEll	ErrEll	ErrEll	ErrEll	ErrEll	ErrEll	ErrEll	ErrEll
		0.710874	0.0881934	ConcTikEll	ConcTikEll	ConcTikEll	ConcTikEll	ConcTikEll	ConcTikEll	ConcTikEll	ConcTikEll	ConcTikEll	ConcTikEll	ConcTikEll	ConcTikEll	ConcTikEll	ConcTikEll			0.788654	0.0960859
		IsoLine	IsoLine																	0.76764	0.0940439
																				0.746872	0.0920056
																				0.726348	0.0899712
																				0.706065	0.0879405
																				0.686021	0.0859137
																				0.666212	0.0838906
																				0.646636	0.0818713
																				0.627289	0.0798557
																				0.60817	0.0778439
																				0.589276	0.0758358
																				0.570604	0.0738315
																				0.552151	0.071831
																				0.533915	0.0698341
																				0.515893	0.067841
																				0.498083	0.0658515
																				0.480482	0.0638658
																				0.463088	0.0618838
																				0.445898	0.0599055
																				0.42891	0.0579309
																				0.412122	0.0559599
																				0.395531	0.0539926
																				0.379135	0.052029
																				0.362932	0.050069
																				0.346919	0.0481127
																				0.331094	0.0461601
																				0.315455	0.044211
																				0.3	0.0422656
																				0.3	0.0422656
																				0.3	0.0421166
																				ConcBand	ConcBand
[truncated: 48 more columns]

## Sheet: PlotDat4
Source sheet	all data	0.562192	0.079227	0	0	0.217708	0.0315113	0.649142	0.0809422	0.665831	0.0833089	0.664896	0.0847723	0.58986	0.0747461	0.616457	0.0759753	0.606048	0.0769724	0.605245	0.0756491	0.609632	0.0755742	0.594633	0.0742638	0.690365	0.0851717	0.736331	0.0911549	0.667933	0.0815115	0.669608	0.0832295	0.696127	0.084478	0.664259	0.0820115	0.687207	0.0838749	0.68396	0.0829131	0.635622	0.0783157	0.673755	0.0829883	0.680313	0.0834691	0.741618	0.0905456
Plot name	Concordia0	0.635715	0.0821906	0.0826367	0.0125848	0.482812	0.0640155	0.647455	0.0817375	0.66524	0.0836303	0.664482	0.0849997	0.589427	0.0749923	0.615778	0.076309	0.605568	0.0772297	0.604703	0.0759509	0.608992	0.0759256	0.594138	0.0745365	0.689614	0.0855741	0.735725	0.0914947	0.66727	0.0818611	0.669107	0.0835052	0.695352	0.0848886	0.663746	0.0822976	0.68647	0.0842833	0.683186	0.0833259	0.635068	0.0786256	0.673185	0.0833072	0.679635	0.0838482	0.740966	0.0908857
Plot Type	1	0.64431	0.0832715	0.172102	0.0253281	0.805631	0.097544	0.642491	0.0824363	0.663514	0.0838964	0.663292	0.0851606	0.588178	0.0751784	0.613786	0.0765952	0.604192	0.0774068	0.603125	0.0761961	0.607125	0.0762141	0.592696	0.0747595	0.687418	0.0859089	0.733968	0.0917613	0.66533	0.0821523	0.667662	0.0837065	0.693088	0.0852294	0.662256	0.0825241	0.684326	0.0846103	0.680924	0.0836673	0.633464	0.0788658	0.671532	0.0835562	0.677672	0.0841412	0.739059	0.0911698
1st free col	247	0.568191	0.0734259	0.268961	0.0382317	1.19873	0.132129	0.634442	0.0830118	0.660719	0.0840969	0.661373	0.085249	0.586161	0.0752972	0.610557	0.0768228	0.601974	0.0774967	0.600572	0.0763752	0.604104	0.0764285	0.590362	0.0749244	0.683863	0.0861631	0.731129	0.0919445	0.662189	0.0823738	0.66533	0.0838258	0.689422	0.0854872	0.659847	0.0826822	0.680859	0.0848433	0.677262	0.0839241	0.630872	0.0790271	0.668859	0.0837257	0.6745	0.084337	0.73597	0.091387
Sigma Level	2	0.581603	0.0750708	0.373824	0.0512976	1.67741	0.167804	0.623616	0.0834419	0.656964	0.0842241	0.658799	0.0852613	0.583454	0.075344	0.606215	0.0769831	0.598997	0.0774962	0.597143	0.0764815	0.600045	0.0765605	0.587226	0.0750249	0.679085	0.086327	0.727316	0.0920371	0.657968	0.0825172	0.662199	0.0838583	0.684495	0.0856522	0.656612	0.0827659	0.676201	0.0849734	0.672341	0.0840865	0.62739	0.0791031	0.66527	0.0838093	0.67024	0.084428	0.731819	0.091529
Absolute Errs	FALSE	0.582254	0.0751413	0.487352	0.064528	2.2603	0.204603	0.610429	0.08371	0.652392	0.0842732	0.655667	0.0851972	0.580159	0.0753171	0.600928	0.0770699	0.595377	0.0774051	0.592968	0.0765107	0.595104	0.0766051	0.583409	0.075057	0.673268	0.0863943	0.722676	0.0920357	0.652828	0.0825769	0.658391	0.083803	0.678496	0.085718	0.652674	0.0827719	0.670532	0.0849955	0.66635	0.0841482	0.623154	0.0790911	0.660902	0.0838037	0.665057	0.0844107	0.726764	0.0915902
Symbol Type	1	0.577755	0.0744775	0.610262	0.077925	2.97009	0.242562	0.595389	0.0838058	0.64718	0.0842423	0.652099	0.085059	0.576405	0.0752175	0.594898	0.0770799	0.591253	0.0772271	0.588209	0.0764618	0.58947	0.0765606	0.579056	0.0750196	0.666635	0.0863623	0.717386	0.0919402	0.646967	0.0825506	0.654052	0.0836619	0.671656	0.085682	0.648186	0.0827	0.664069	0.0849089	0.659518	0.0841068	0.618326	0.0789914	0.655924	0.0837092	0.659149	0.0842857	0.721	0.0915683
Inverse Plot	FALSE	0.577085	0.0742861	0.743328	0.0914905	3.83441	0.281716	0.579073	0.0837256	0.641527	0.0841325	0.648232	0.0848522	0.572335	0.0750491	0.588357	0.0770126	0.586783	0.0769689	0.583048	0.0763366	0.58336	0.0764287	0.574337	0.074914	0.659441	0.0862324	0.711651	0.0917544	0.64061	0.0824394	0.649348	0.0834405	0.664238	0.0855458	0.643319	0.0825529	0.657061	0.0847168	0.652109	0.083964	0.61309	0.0788079	0.650526	0.0835293	0.652743	0.0840579	0.714748	0.0914642
Color Plot	TRUE	0.569491	0.0732469	0.887391	0.105227	4.8869	0.322105	0.562108	0.0834726	0.63565	0.0839481	0.644214	0.0845846	0.568106	0.0748183	0.581557	0.0768708	0.582139	0.0766405	0.577684	0.07614	0.577008	0.0762145	0.569431	0.0747444	0.651963	0.0860095	0.705691	0.0914854	0.634002	0.0822476	0.64446	0.0831472	0.656526	0.0853144	0.63826	0.0823364	0.649777	0.0844266	0.644407	0.0837253	0.60765	0.0785477	0.644916	0.083271	0.646087	0.083736	0.708249	0.0912818
3D plot	FALSE	0.652041	0.0838128	1.04336	0.119136	6.16853	0.363766	0.545146	0.0830564	0.629776	0.0836962	0.6402	0.0842666	0.56388	0.074534	0.574758	0.0766597	0.577499	0.0762544	0.572322	0.0758795	0.57066	0.0759261	0.564527	0.0745173	0.644488	0.0857022	0.699734	0.0911435	0.627396	0.0819824	0.639576	0.0827933	0.648817	0.0849968	0.633205	0.0820587	0.642497	0.0840495	0.636708	0.0833997	0.602213	0.0782207	0.63931	0.0829442	0.639434	0.0833324	0.701752	0.0910282
Linear	FALSE	0.705788	0.0895893	1.21222	0.13322	7.72917	0.40674	0.52884	0.082493	0.62413	0.0833864	0.636343	0.0839103	0.55982	0.0742071	0.568223	0.0763876	0.573042	0.0758256	0.567169	0.0755651	0.564559	0.0755747	0.559814	0.0742413	0.637303	0.0853223	0.69401	0.0907419	0.621047	0.0816541	0.634884	0.0823924	0.641408	0.0846052	0.628346	0.0817305	0.635501	0.0836	0.629309	0.0829999	0.596988	0.0778395	0.633922	0.0825615	0.633042	0.0828625	0.695507	0.0907132
Data Range	C3:G121	0.634068	0.0803402	1.39503	0.147481	IsoLine	IsoLine	0.513815	0.0818042	0.61893	0.0830306	0.632793	0.0835295	0.556082	0.0738502	0.562201	0.0760649	0.568939	0.0753705	0.562423	0.0752089	0.558939	0.0751738	0.555473	0.0739271	0.630684	0.0848843	0.688739	0.090296	0.615198	0.0812754	0.630564	0.08196	0.634583	0.0841547	0.623872	0.0813644	0.629057	0.0830953	0.622492	0.0825412	0.592177	0.0774188	0.628961	0.0821376	0.627155	0.0823445	0.689754	0.0903487
Filled Symbols	TRUE	0.644565	0.0815708	1.59294	0.161922			0.500649	0.0810163	0.614374	0.0826426	0.629685	0.0831387	0.552809	0.073477	0.556926	0.075704	0.565348	0.0749066	0.558266	0.0748246	0.554016	0.0747388	0.551671	0.0735867	0.624886	0.0844052	0.684122	0.0898229	0.610074	0.0808607	0.626782	0.0815126	0.628604	0.0836625	0.619954	0.0809746	0.623414	0.0825549	0.616521	0.0820412	0.587964	0.0769747	0.624617	0.0816887	0.622001	0.0817983	0.684715	0.0899489
ConcAge	FALSE	0.656606	0.083071	1.80721	0.176545			0.489848	0.0801596	0.610639	0.0822372	0.62714	0.0827531	0.550127	0.0731019	0.552598	0.0753188	0.562407	0.0744517	0.554858	0.074427	0.54998	0.0742864	0.548554	0.0732333	0.620132	0.0839033	0.680339	0.0893409	0.605872	0.080426	0.623684	0.0810674	0.623701	0.0831475	0.616742	0.0805759	0.618788	0.0819995	0.611625	0.0815191	0.584511	0.0765244	0.621056	0.0812322	0.617776	0.0812448	0.680582	0.0895291
ConcSwap	FALSE	0.638338	0.0807448	2.03919	0.191351			0.481827	0.0792671	0.607867	0.08183	0.625254	0.0823874	0.548139	0.0727391	0.549386	0.074924	0.560228	0.0740233	0.55233	0.0740313	0.546986	0.073834	0.546241	0.0728804	0.616604	0.083398	0.677533	0.0888684	0.602754	0.0799879	0.621387	0.0806416	0.620063	0.0826297	0.61436	0.0801836	0.615356	0.0814504	0.607992	0.080995	0.581951	0.076085	0.618415	0.0807855	0.614644	0.0807054	0.677515	0.0891054
1st Symbol-row	1	0.649881	0.0821647	2.29034	0.206344			0.476895	0.078373	0.606165	0.0814366	0.6241	0.0820556	0.546922	0.0724028	0.547411	0.0745349	0.558895	0.0736379	0.550779	0.0736528	0.545148	0.0733989	0.544821	0.0725416	0.614438	0.0829086	0.675813	0.0884236	0.60084	0.0795635	0.619982	0.0802515	0.617829	0.0821288	0.612899	0.079813	0.613252	0.0809287	0.605761	0.080489	0.580382	0.0756735	0.616797	0.0803658	0.612725	0.0802007	0.675631	0.0886941
		0.64449	0.0814669	2.56225	0.221526			0.475241	0.0775118	0.6056	0.0810723	0.623723	0.0817706	0.546522	0.0721058	0.54675	0.0741663	0.558461	0.0733102	0.550265	0.0733059	0.544537	0.072998	0.54435	0.07223	0.613716	0.0824539	0.675245	0.0880236	0.600202	0.0791688	0.619521	0.0799121	0.617085	0.0816641	0.612416	0.0794782	0.612555	0.0804546	0.605019	0.0800206	0.579865	0.0753057	0.616263	0.0799893	0.612092	0.0797501	0.675003	0.088311
		0.607744	0.0768107	2.85662	0.236899			0.476928	0.0767165	0.606191	0.0807509	0.624138	0.0815433	0.546955	0.0718595	0.547429	0.0738326	0.55894	0.073053	0.550807	0.0730041	0.545178	0.0726465	0.544845	0.0719573	0.614468	0.0820514	0.675851	0.0876838	0.600865	0.0788192	0.620023	0.0796364	0.61786	0.0812535	0.61293	0.079192	0.613292	0.0800462	0.605794	0.0796078	0.580419	0.0749957	0.616833	0.0796704	0.61277	0.079371	0.675655	0.0879709
		0.645009	0.0814888	3.17532	0.252465			0.481892	0.0760177	0.607917	0.0804848	0.625327	0.0813823	0.548204	0.0716735	0.549421	0.0735464	0.560316	0.0728759	0.552385	0.0727589	0.547044	0.0723581	0.546287	0.0717343	0.616664	0.0817167	0.677608	0.0874172	0.602805	0.0785281	0.621467	0.0794351	0.620124	0.0809127	0.614419	0.0789655	0.615436	0.0797192	0.608055	0.0792664	0.582023	0.0747555	0.618486	0.0794214	0.614733	0.0790779	0.677563	0.0876868
		0.646203	0.0816096	3.52035	0.268227			0.489941	0.0754422	0.610711	0.0802843	0.627246	0.081294	0.550221	0.0715547	0.55265	0.0733187	0.562535	0.072786	0.554937	0.0725798	0.550065	0.0721437	0.548621	0.0715694	0.620219	0.0814625	0.680447	0.087234	0.605946	0.0783065	0.6238	0.0793159	0.62379	0.0806549	0.616828	0.0788074	0.618903	0.0794862	0.611717	0.0790096	0.584615	0.0745943	0.621159	0.0792519	0.617905	0.0788821	0.680651	0.0874696
		0.708311	0.0894283	3.8939	0.284187			0.500767	0.0750121	0.614466	0.0801571	0.629821	0.0812817	0.552929	0.0715079	0.556992	0.0731585	0.565511	0.0727865	0.558367	0.0724735	0.554124	0.0720117	0.551757	0.0714689	0.624997	0.0812986	0.68426	0.0871414	0.610167	0.0781632	0.62693	0.0792833	0.628717	0.0804899	0.620064	0.0787237	0.623561	0.0793561	0.616638	0.0788473	0.588097	0.0745182	0.624748	0.0791683	0.622165	0.0787911	0.684803	0.0873276
		0.635254	0.0802006	4.29831	0.300349			0.513954	0.074744	0.619038	0.080108	0.632952	0.0813458	0.556223	0.0715348	0.562279	0.0730717	0.569131	0.0728776	0.562541	0.0724443	0.559066	0.0719671	0.555574	0.0714368	0.630814	0.0812313	0.6889	0.0871429	0.615308	0.0781035	0.630738	0.0793386	0.634716	0.0804241	0.624001	0.0787177	0.62923	0.0793339	0.62263	0.0787856	0.592333	0.0745303	0.629116	0.0791739	0.627348	0.0788084	0.689858	0.0872664
		0.65158	0.0822481	4.73615	0.316713			0.528994	0.0746482	0.624251	0.0801389	0.63652	0.0814839	0.559977	0.0716344	0.568309	0.0730617	0.573255	0.0730556	0.5673	0.0724932	0.5647	0.0720116	0.559926	0.0714742	0.637447	0.0812633	0.69419	0.0872383	0.621169	0.0781297	0.635077	0.0794797	0.641556	0.08046	0.62849	0.0787897	0.635693	0.0794206	0.629461	0.0788269	0.597162	0.07463	0.634094	0.0792684	0.633256	0.0789334	0.695622	0.0872883
		0.679016	0.0846467	5.21016	0.333284			0.54531	0.0747284	0.629904	0.0802487	0.640387	0.0816907	0.564047	0.0718028	0.57485	0.0731289	0.577725	0.0733138	0.572461	0.0726184	0.57081	0.0721435	0.564646	0.0715798	0.644641	0.0813932	0.699925	0.0874241	0.627525	0.0782409	0.639781	0.0797012	0.648974	0.0805963	0.633357	0.0789367	0.642701	0.0796127	0.636871	0.0789697	0.602397	0.0748134	0.639492	0.0794483	0.639662	0.0791612	0.701874	0.0873924
		0.686172	0.0855361	5.72335	0.350063			0.562275	0.0749814	0.635781	0.0804331	0.644405	0.0819583	0.568276	0.0720336	0.58165	0.0732708	0.58237	0.0736422	0.577826	0.072815	0.577161	0.0723577	0.569552	0.0717494	0.652119	0.0816161	0.705885	0.0876932	0.634134	0.0784328	0.644669	0.0799945	0.656686	0.0808277	0.638416	0.0791532	0.649985	0.0799028	0.644572	0.0792084	0.607837	0.0750737	0.645102	0.0797066	0.646318	0.0794832	0.708373	0.0875748
		0.648148	0.0807923	6.27895	0.367054			0.579237	0.0753976	0.641655	0.080685	0.64842	0.0822764	0.572502	0.0723179	0.588449	0.0734818	0.587009	0.0740283	0.583187	0.0730755	0.583509	0.0726461	0.574456	0.0719766	0.659594	0.0819234	0.711842	0.088035	0.640739	0.0786979	0.649553	0.0803484	0.664394	0.0811453	0.643471	0.0794309	0.657265	0.0802799	0.652271	0.079534	0.613274	0.0754006	0.650708	0.0800333	0.652971	0.0798868	0.71487	0.0878284
		0.650782	0.0811109	6.88046	0.384258			0.595543	0.0759609	0.6473	0.0809948	0.652276	0.0826326	0.576562	0.0726447	0.594984	0.0737539	0.591466	0.0744571	0.58834	0.0733899	0.589611	0.0729974	0.579168	0.0722525	0.666779	0.0823033	0.717566	0.0884366	0.647088	0.0790262	0.654245	0.0807492	0.671804	0.0815369	0.648329	0.0797591	0.664261	0.0807294	0.659671	0.0799338	0.618499	0.0757818	0.656096	0.0804161	0.659363	0.0803566	0.721114	0.0881434
		0.627484	0.0782044	7.53167	0.401678			0.610568	0.0766498	0.652501	0.0813506	0.655827	0.0830135	0.5803	0.0730016	0.601006	0.0740766	0.595569	0.0749122	0.593086	0.0737461	0.595231	0.0733983	0.583509	0.0725667	0.673398	0.0827412	0.722837	0.0888825	0.652937	0.079405	0.658565	0.0811817	0.678629	0.0819874	0.652804	0.0801252	0.670704	0.0812341	0.666487	0.0803925	0.62331	0.0762025	0.661057	0.08084	0.66525	0.0808746	0.726867	0.0885079
		0.663076	0.0826277	8.2367	0.419318			0.623734	0.0774377	0.657057	0.0817386	0.658934	0.0834042	0.583574	0.0733749	0.606281	0.0744376	0.59916	0.0753761	0.597243	0.0741304	0.600153	0.0738333	0.587312	0.0729071	0.679196	0.0832204	0.727454	0.0893556	0.658061	0.0798197	0.662347	0.0816291	0.684608	0.0824796	0.656722	0.0805151	0.676348	0.0817746	0.672458	0.0808926	0.627523	0.0766466	0.665401	0.0812889	0.670404	0.0814208	0.731907	0.0889077
		0.663909	0.0827272	8.99999	0.43718			0.634535	0.0782944	0.660792	0.082144	0.66148	0.0837898	0.586256	0.07375	0.610609	0.0748228	0.602102	0.075831	0.600651	0.074528	0.604189	0.0742858	0.590429	0.0732605	0.68395	0.0837222	0.731237	0.0898376	0.662263	0.0802544	0.665446	0.0820742	0.689511	0.0829945	0.659934	0.0809138	0.680974	0.08233	0.677354	0.0814147	0.630976	0.077097	0.668962	0.0817454	0.674629	0.0819743	0.73604	0.0893275
		0.697494	0.086898	9	0.43718			0.642556	0.0791869	0.663564	0.0825512	0.663366	0.0841556	0.588243	0.0741127	0.613821	0.0752176	0.604281	0.0762594	0.603179	0.0749237	0.607184	0.0747382	0.592742	0.0736134	0.687478	0.0842276	0.734043	0.0903101	0.665381	0.0806924	0.667742	0.0825	0.693149	0.0835124	0.662316	0.081306	0.684405	0.0828791	0.680987	0.0819388	0.633536	0.0775364	0.671603	0.0821921	0.677761	0.0825138	0.739107	0.0897512
		0.624807	0.0778277	IsoLine	IsoLine			0.647488	0.0800809	0.665265	0.0829446	0.664519	0.0844873	0.589461	0.0744491	0.615796	0.0756067	0.605613	0.0766448	0.60473	0.0753022	0.609022	0.0751732	0.594161	0.0739522	0.689644	0.084717	0.735763	0.0907549	0.667296	0.0811169	0.669147	0.0828901	0.695383	0.0840133	0.663776	0.0816766	0.68651	0.0834007	0.683218	0.0824447	0.635105	0.0779479	0.673221	0.0826118	0.67968	0.0830185	0.74099	0.0901625
		0.683311	0.0851073					0.649142	0.0809422	0.665831	0.0833089	0.664896	0.0847723	0.58986	0.0747461	0.616457	0.0759753	0.606048	0.0769724	0.605245	0.0756491	0.609632	0.0755742	0.594633	0.0742638	0.690365	0.0851717	0.736331	0.0911549	0.667933	0.0815115	0.669608	0.0832295	0.696127	0.084478	0.664259	0.0820115	0.687207	0.0838749	0.68396	0.0829131	0.635622	0.0783157	0.673755	0.0829883	0.680313	0.0834691	0.741618	0.0905456
		0.700096	0.0871939					ErrEll	ErrEll	ErrEll	ErrEll	ErrEll	ErrEll	ErrEll	ErrEll	ErrEll	ErrEll	ErrEll	ErrEll	ErrEll	ErrEll	ErrEll	ErrEll	ErrEll	ErrEll	ErrEll	ErrEll	ErrEll	ErrEll	ErrEll	ErrEll	ErrEll	ErrEll	ErrEll	ErrEll	ErrEll	ErrEll	ErrEll	ErrEll	ErrEll	ErrEll	ErrEll	ErrEll	ErrEll	ErrEll	ErrEll	ErrEll	ErrEll	ErrEll
		0.66652	0.0829872
		0.640871	0.0797906
		0.442692	0.0551139
		0.640361	0.0797082
		0.69859	0.0869546
		0.691533	0.0860719
		0.663055	0.0825168
		0.658105	0.0818975
		0.640464	0.0796982
		0.620106	0.0771594
		0.689076	0.0857346
		0.669427	0.0832828
		0.69097	0.0859404
		0.661339	0.0822527
		0.717562	0.0892271
		0.668474	0.0831103
		0.636834	0.0791624
		0.70471	0.0875954
		0.650393	0.0808423
		0.618714	0.0768802
		0.696904	0.0865796
		0.702561	0.0872807
		0.694912	0.0862535
		0.710874	0.0881934
		0.663809	0.0819553
		0.727091	0.0896148
		0.730467	0.0900168
		0.655108	0.0806578
		0.721871	0.0888274
		0.674515	0.0829172
		0.67404	0.0827853
		0.667569	0.0819487
		0.718173	0.0879698
		0.623028	0.0763095
		0.640532	0.0783166
		0.611455	0.074612
		0.666466	0.0809869
		0.64654	0.0785568
		0.610267	0.0741427
		0.674902	0.0818546
		0.66779	0.0808053
		0.660362	0.0798305
		0.679447	0.0820757
		0.68067	0.0821864
		0.650712	0.078282
		0.943863	0.11323
		0.725994	0.0869802
		0.677153	0.080987
		0.656989	0.0783937
		0.857954	0.102055
		0.706613	0.0840527
		0.669895	0.0795805
		0.730842	0.0865301
		0.700184	0.0828287
		0.691803	0.081523
		0.584699	0.0686819
		0.537808	0.0630309
		0.699766	0.08192
		0.671699	0.0778227
		0.481653	0.0556799
		0.666646	0.0769167
		0.677481	0.0781266
		0.746555	0.0860912
		0.731787	0.0840732
		0.762295	0.0858502
		1.05279	0.117041
		0.86722	0.095811
		0.843398	0.0931366
		0.495745	0.054552
		0.722261	0.0782796
		1.2879	0.139068
		0.99985	0.10682
		0.744795	0.0795319
		0.730154	0.0762797
		0.775606	0.080174
		1.13711	0.109618
		1.04214	0.0995128
		0.982322	0.0879417
		5.05491	0.326795
		3.18714	0.192063
		5.13826	0.298332
		6.51114	0.373781
		6.61763	0.375159
		0.491228	0.0189945
		1.11122	0.0306133
		IsoLine	IsoLine
[truncated: 196 more columns]

## Sheet: PlotDat3
Source sheet	all data	0.569491	0.0732469	440		450		460		470		480		490		0.536563	0.07	0.537708	0.07	0.542391	0.0706383	0.594633	0.0742638	0.58986	0.0747461	0.609632	0.0755742	0.605245	0.0756491	0.616457	0.0759753	0.606048	0.0769724	0.587964	0.074822
Plot name	Concordia0	0.568191	0.0734259	0.543504	0.0706383	0.558806	0.0723004	0.574259	0.0739651	0.589866	0.0756324	0.605627	0.0773023	0.621545	0.0789747	0.536563	0.07	0.539383	0.0701832	0.557657	0.0723004	0.594138	0.0745365	0.589427	0.0749923	0.608992	0.0759256	0.604703	0.0759509	0.615778	0.076309	0.605568	0.0772297	0.587708	0.0749673
Plot Type	1	0.577085	0.0742861	0.543482	0.070657	0.558784	0.0723195	0.574236	0.0739847	0.589842	0.0756524	0.605603	0.0773227	0.62152	0.0789957	0.539383	0.0703091	0.542208	0.0704919	0.573073	0.0739651	0.592696	0.0747595	0.588178	0.0751784	0.607125	0.0762141	0.603125	0.0761961	0.613786	0.0765952	0.604192	0.0774068	0.586967	0.0750821
1st free col	37	0.577755	0.0744775	0.543419	0.0706749	0.558718	0.0723379	0.574169	0.0740035	0.589773	0.0756717	0.605531	0.0773425	0.621446	0.0790158	0.542208	0.0706183	0.545039	0.0708006	0.588642	0.0756324	0.590362	0.0749244	0.586161	0.0752972	0.604104	0.0764285	0.600572	0.0763752	0.610557	0.0768228	0.601974	0.0774967	0.585768	0.0751621
Sigma Level	2	0.581603	0.0750708	0.543316	0.0706915	0.558612	0.0723549	0.574059	0.0740209	0.58966	0.0756894	0.605415	0.0773606	0.621326	0.0790344	0.545039	0.0709275	0.547875	0.0711093	0.604365	0.0773023	0.587226	0.0750249	0.583454	0.075344	0.600045	0.0765605	0.597143	0.0764815	0.606215	0.0769831	0.598997	0.0774962	0.584158	0.0752041
Absolute Errs	FALSE	0.582254	0.0751413	0.543178	0.070706	0.558469	0.0723697	0.573912	0.0740361	0.589507	0.075705	0.605258	0.0773765	0.621164	0.0790507	0.547875	0.0712369	0.550715	0.0714182	0.620244	0.0789747	0.583409	0.075057	0.580159	0.0753171	0.595104	0.0766051	0.592968	0.0765107	0.600928	0.0770699	0.595377	0.0774051	0.582198	0.0752067
Symbol Type	1	IsoLine	IsoLine	0.543009	0.0707179	0.558295	0.0723819	0.573732	0.0740485	0.589322	0.0757178	0.605066	0.0773896	0.620967	0.079064	0.550715	0.0715464	0.553562	0.0717272	IsoLine	IsoLine	0.579056	0.0750196	0.576405	0.0752175	0.58947	0.0765606	0.588209	0.0764618	0.594898	0.0770799	0.591253	0.0772271	0.579964	0.0751695
Inverse Plot	FALSE			0.542817	0.0707267	0.558096	0.072391	0.573527	0.0740578	0.58911	0.0757273	0.604848	0.0773993	0.620742	0.0790739	0.553562	0.0718559	0.556413	0.0720362			0.574337	0.074914	0.572335	0.0750491	0.58336	0.0764287	0.583048	0.0763366	0.588357	0.0770126	0.586783	0.0769689	0.577542	0.0750942
Color Plot	TRUE			0.542608	0.0707321	0.557881	0.0723965	0.573304	0.0740635	0.588881	0.0757331	0.604611	0.0774053	0.620497	0.0790801	0.556413	0.0721655	0.55927	0.0723454			0.569431	0.0747444	0.568106	0.0748183	0.577008	0.0762145	0.577684	0.07614	0.581557	0.0768708	0.582139	0.0766405	0.575025	0.0749835
3D plot	FALSE			0.542391	0.070734	0.557657	0.0723984	0.573073	0.0740655	0.588642	0.0757351	0.604365	0.0774073	0.620244	0.0790821	0.55927	0.0724752	0.562132	0.0726546			0.564527	0.0745173	0.56388	0.074534	0.57066	0.0759261	0.572322	0.0758795	0.574758	0.0766597	0.577499	0.0762544	0.57251	0.0748418
Linear	FALSE			0.542174	0.0707321	0.557432	0.0723965	0.572842	0.0740635	0.588403	0.0757331	0.604119	0.0774053	0.61999	0.0790801	0.562132	0.072785	0.564999	0.0729639			0.559814	0.0742413	0.55982	0.0742071	0.564559	0.0755747	0.567169	0.0755651	0.568223	0.0763876	0.573042	0.0758256	0.570093	0.0746745
Data Range	AC3:AG8			0.541966	0.0707267	0.557217	0.072391	0.572619	0.0740578	0.588174	0.0757273	0.603882	0.0773993	0.619746	0.0790739	0.564999	0.0730949	0.567871	0.0732733			0.555473	0.0739271	0.556082	0.0738502	0.558939	0.0751738	0.562423	0.0752089	0.562201	0.0760649	0.568939	0.0753705	0.567866	0.0744879
Filled Symbols	TRUE			0.541773	0.0707179	0.557018	0.0723819	0.572414	0.0740485	0.587962	0.0757178	0.603664	0.0773896	0.619521	0.079064	0.567871	0.0734049	0.570749	0.0735828			0.551671	0.0735867	0.552809	0.073477	0.554016	0.0747388	0.558266	0.0748246	0.556926	0.075704	0.565348	0.0749066	0.565917	0.0742894
ConcAge	TRUE			0.541605	0.070706	0.556844	0.0723697	0.572234	0.0740361	0.587776	0.075705	0.603472	0.0773765	0.619323	0.0790507	0.570749	0.073715	0.573632	0.0738924			0.548554	0.0732333	0.550127	0.0731019	0.54998	0.0742864	0.554858	0.074427	0.552598	0.0753188	0.562407	0.0744517	0.564319	0.0740864
ConcSwap	FALSE			0.541466	0.0706915	0.556701	0.0723549	0.572087	0.0740209	0.587624	0.0756894	0.603315	0.0773606	0.619161	0.0790344	0.573632	0.0740252	0.57652	0.0742021			0.546241	0.0728804	0.548139	0.0727391	0.546986	0.073834	0.55233	0.0740313	0.549386	0.074924	0.560228	0.0740233	0.563134	0.0738869
1st Symbol-row	1			0.541363	0.0706749	0.556595	0.0723379	0.571977	0.0740035	0.587511	0.0756717	0.603199	0.0773425	0.619041	0.0790158	0.57652	0.0743354	0.579413	0.0745119			0.544821	0.0725416	0.546922	0.0724028	0.545148	0.0733989	0.550779	0.0736528	0.547411	0.0745349	0.558895	0.0736379	0.562408	0.0736984
				0.5413	0.070657	0.55653	0.0723195	0.57191	0.0739847	0.587441	0.0756524	0.603127	0.0773227	0.618967	0.0789957	0.579413	0.0746458	0.582312	0.0748217			0.54435	0.07223	0.546522	0.0721058	0.544537	0.072998	0.550265	0.0733059	0.54675	0.0741663	0.558461	0.0733102	0.562168	0.0735283
				0.541279	0.0706383	0.556508	0.0723004	0.571887	0.0739651	0.587418	0.0756324	0.603103	0.0773023	0.618942	0.0789747	0.582312	0.0749562	0.585216	0.0751317			0.544845	0.0719573	0.546955	0.0718595	0.545178	0.0726465	0.550807	0.0730041	0.547429	0.0738326	0.55894	0.073053	0.562424	0.073383
				0.5413	0.0706196	0.55653	0.0722813	0.57191	0.0739455	0.587441	0.0756123	0.603127	0.0772818	0.618967	0.0789538	0.585216	0.0752667	0.588126	0.0754417			0.546287	0.0717343	0.548204	0.0716735	0.547044	0.0723581	0.552385	0.0727589	0.549421	0.0735464	0.560316	0.0728759	0.563165	0.0732682
				0.541363	0.0706017	0.556595	0.0722629	0.571977	0.0739267	0.587511	0.0755931	0.603199	0.0772621	0.619041	0.0789336	0.588126	0.0755773	0.591041	0.0757518			0.548621	0.0715694	0.550221	0.0715547	0.550065	0.0721437	0.554937	0.0725798	0.55265	0.0733187	0.562535	0.072786	0.564364	0.0731882
				0.541466	0.0705851	0.556701	0.0722459	0.572087	0.0739093	0.587624	0.0755753	0.603315	0.0772439	0.619161	0.078915	0.591041	0.075888	0.593961	0.0760621			0.551757	0.0714689	0.552929	0.0715079	0.554124	0.0720117	0.558367	0.0724735	0.556992	0.0731585	0.565511	0.0727865	0.565974	0.0731461
				0.541605	0.0705706	0.556844	0.0722311	0.572234	0.0738941	0.587776	0.0755598	0.603472	0.077228	0.619323	0.0788988	0.593961	0.0761988	0.596886	0.0763724			0.555574	0.0714368	0.556223	0.0715348	0.559066	0.0719671	0.562541	0.0724443	0.562279	0.0730717	0.569131	0.0728776	0.567934	0.0731436
				0.541773	0.0705587	0.557018	0.0722189	0.572414	0.0738817	0.587962	0.075547	0.603664	0.0772149	0.619521	0.0788854	0.596886	0.0765097	0.599817	0.0766828			0.559926	0.0714742	0.559977	0.0716344	0.5647	0.0720116	0.5673	0.0724932	0.568309	0.0730617	0.573255	0.0730556	0.570167	0.0731807
				0.541966	0.0705499	0.557217	0.0722098	0.572619	0.0738724	0.588174	0.0755375	0.603882	0.0772052	0.619746	0.0788755	0.599817	0.0768207	0.602753	0.0769932			0.564646	0.0715798	0.564047	0.0718028	0.57081	0.0721435	0.572461	0.0726184	0.57485	0.0731289	0.577725	0.0733138	0.572589	0.0732561
				0.542174	0.0705444	0.557432	0.0722043	0.572842	0.0738667	0.588403	0.0755317	0.604119	0.0771992	0.61999	0.0788694	0.602753	0.0771317	0.605695	0.0773038			0.569552	0.0717494	0.568276	0.0720336	0.577161	0.0723577	0.577826	0.072815	0.58165	0.0732708	0.58237	0.0736422	0.575106	0.0733667
				0.542391	0.0705426	0.557657	0.0722024	0.573073	0.0738647	0.588642	0.0755297	0.604365	0.0771972	0.620244	0.0788673	0.605695	0.0774429	0.608642	0.0776145			0.574456	0.0719766	0.572502	0.0723179	0.583509	0.0726461	0.583187	0.0730755	0.588449	0.0734818	0.587009	0.0740283	0.577622	0.0735085
				0.542608	0.0705444	0.557881	0.0722043	0.573304	0.0738667	0.588881	0.0755317	0.604611	0.0771992	0.620497	0.0788694	0.608642	0.0777541	0.611595	0.0779252			0.579168	0.0722525	0.576562	0.0726447	0.589611	0.0729974	0.58834	0.0733899	0.594984	0.0737539	0.591466	0.0744571	0.580039	0.0736758
				0.542817	0.0705499	0.558096	0.0722098	0.573527	0.0738724	0.58911	0.0755375	0.604848	0.0772052	0.620742	0.0788755	0.611595	0.0780655	0.614553	0.0782361			0.583509	0.0725667	0.5803	0.0730016	0.595231	0.0733983	0.593086	0.0737461	0.601006	0.0740766	0.595569	0.0749122	0.582265	0.0738624
				0.543009	0.0705587	0.558295	0.0722189	0.573732	0.0738817	0.589322	0.075547	0.605066	0.0772149	0.620967	0.0788854	0.614553	0.0783769	0.617516	0.078547			0.587312	0.0729071	0.583574	0.0733749	0.600153	0.0738333	0.597243	0.0741304	0.606281	0.0744376	0.59916	0.0753761	0.584215	0.0740609
				0.543178	0.0705706	0.558469	0.0722311	0.573912	0.0738941	0.589507	0.0755598	0.605258	0.077228	0.621164	0.0788988	0.617516	0.0786884	0.620485	0.078858			0.590429	0.0732605	0.586256	0.07375	0.604189	0.0742858	0.600651	0.074528	0.610609	0.0748228	0.602102	0.075831	0.585813	0.0742639
				0.543316	0.0705851	0.558612	0.0722459	0.574059	0.0739093	0.58966	0.0755753	0.605415	0.0772439	0.621326	0.078915	0.620485	0.079	0.621842	0.079			0.592742	0.0736134	0.588243	0.0741127	0.607184	0.0747382	0.603179	0.0749237	0.613821	0.0752176	0.604281	0.0762594	0.586998	0.0744634
				0.543419	0.0706017	0.558718	0.0722629	0.574169	0.0739267	0.589773	0.0755931	0.605531	0.0772621	0.621446	0.0789336	0.620485	0.079	0.619135	0.079			0.594161	0.0739522	0.589461	0.0744491	0.609022	0.0751732	0.60473	0.0753022	0.615796	0.0756067	0.605613	0.0766448	0.587724	0.0746518
				0.543482	0.0706196	0.558784	0.0722813	0.574236	0.0739455	0.589842	0.0756123	0.605603	0.0772818	0.62152	0.0789538	IsoLine	IsoLine	0.617516	0.0788298			0.594633	0.0742638	0.58986	0.0747461	0.609632	0.0755742	0.605245	0.0756491	0.616457	0.0759753	0.606048	0.0769724	0.587964	0.074822
				0.543504	0.0706383	0.558806	0.0723004	0.574259	0.0739651	0.589866	0.0756324	0.605627	0.0773023	0.621545	0.0789747			0.614553	0.0785177			ErrEll	ErrEll	ErrEll	ErrEll	ErrEll	ErrEll	ErrEll	ErrEll	ErrEll	ErrEll	ErrEll	ErrEll	ErrEll	ErrEll
				ConcTikEll	ConcTikEll	ConcTikEll	ConcTikEll	ConcTikEll	ConcTikEll	ConcTikEll	ConcTikEll	ConcTikEll	ConcTikEll	ConcTikEll	ConcTikEll			0.611595	0.0782057
																		0.608642	0.0778938
																		0.605695	0.077582
																		0.602753	0.0772702
																		0.599817	0.0769586
																		0.596886	0.076647
																		0.593961	0.0763356
																		0.591041	0.0760242
																		0.588126	0.0757129
																		0.585216	0.0754017
																		0.582312	0.0750906
																		0.579413	0.0747796
																		0.57652	0.0744687
																		0.573632	0.0741579
																		0.570749	0.0738471
																		0.567871	0.0735365
																		0.564999	0.0732259
																		0.562132	0.0729155
																		0.55927	0.0726051
																		0.556413	0.0722948
																		0.553562	0.0719846
																		0.550715	0.0716745
																		0.547875	0.0713645
																		0.545039	0.0710545
																		0.542208	0.0707447
																		0.539383	0.0704349
																		0.536563	0.0701253
																		0.535424	0.07
																		0.537708	0.07
																		ConcBand	ConcBand

## Sheet: PlotDat5
Source sheet	all data	0.569491	0.0732469	0	0	0.217708	0.0315113	0.594633	0.0742638	0.58986	0.0747461	0.609632	0.0755742	0.605245	0.0756491	0.616009	0.0751815	0.616457	0.0759753	0.606048	0.0769724	0.618049	0.0764506	0.635622	0.0783157	0.631208	0.0785652	0.62415	0.0787621	0.650965	0.0795137	0.641253	0.0789768	0.658937	0.0794657	0.653614	0.0788051	0.648514	0.0789979	0.643959	0.079246	0.644376	0.0799931	0.668686	0.0807036	0.664805	0.0799311	0.64644	0.0802211
Plot name	Concordia1	0.568191	0.0734259	0.0826367	0.0125848	0.482812	0.0640155	0.593597	0.0746446	0.588959	0.0750849	0.608292	0.0760653	0.604111	0.07607	0.61471	0.0755618	0.615032	0.0764457	0.605051	0.0773206	0.61673	0.0768302	0.634466	0.0787441	0.630404	0.0788609	0.623268	0.0790944	0.649876	0.0799023	0.640468	0.079263	0.657642	0.0799292	0.652588	0.0791258	0.647523	0.079313	0.643184	0.0795157	0.6437	0.0802381	0.667369	0.0811834	0.663664	0.080302	0.645649	0.0805076
Plot Type	1	0.577085	0.0742861	0.172102	0.0253281	0.805631	0.097544	0.590609	0.074912	0.586375	0.0752893	0.604424	0.0764123	0.600842	0.0763619	0.61093	0.0758633	0.610898	0.0768048	0.602208	0.0774923	0.612893	0.0771335	0.631146	0.0790159	0.628099	0.0790383	0.620728	0.0793163	0.646756	0.0801228	0.638203	0.0794588	0.653904	0.080253	0.649611	0.0793724	0.644646	0.0795547	0.640942	0.0797122	0.641762	0.08038	0.663579	0.0814995	0.660356	0.0805822	0.643365	0.0807091
1st free col	185	0.577755	0.0744775	0.268961	0.0382317	1.19873	0.132129	0.58591	0.0750446	0.582317	0.0753427	0.598341	0.076587	0.595703	0.0765011	0.604978	0.0760614	0.604392	0.0770234	0.597748	0.0774734	0.60685	0.0773359	0.625929	0.079109	0.624479	0.0790831	0.616736	0.0794098	0.641858	0.0801574	0.634644	0.0795484	0.648026	0.0804108	0.644923	0.0795251	0.640116	0.0797034	0.637414	0.0798196	0.638719	0.0804072	0.657622	0.0816263	0.655148	0.0807491	0.639773	0.080809
Sigma Level	2	0.584105	0.0745883	0.373824	0.0512976	1.67741	0.167804	0.57988	0.0750315	0.577116	0.0752409	0.590536	0.0765753	0.58911	0.0764764	0.597335	0.0761403	0.596039	0.0770838	0.592033	0.0772657	0.59909	0.077421	0.619239	0.0790159	0.619838	0.0789916	0.611616	0.0793672	0.635578	0.0800032	0.630077	0.0795245	0.640483	0.0803899	0.638905	0.0795715	0.6343	0.079747	0.632885	0.0798292	0.634818	0.0803176	0.649981	0.0815534	0.648463	0.0807892	0.635164	0.0807994
Absolute Errs	FALSE	0.581603	0.0750708	0.487352	0.064528	2.2603	0.204603	0.573009	0.0748739	0.571191	0.074992	0.581641	0.0763781	0.581597	0.0762898	0.588619	0.0760934	0.586517	0.0769812	0.585526	0.0768858	0.590241	0.0773819	0.611618	0.0787442	0.614552	0.0787712	0.605783	0.0791921	0.628426	0.0796728	0.624873	0.0793891	0.631888	0.0801919	0.632044	0.0795078	0.62767	0.079682	0.627724	0.0797403	0.630375	0.0801184	0.641274	0.0812869	0.640842	0.0806991	0.629912	0.080681
Symbol Type	1	0.582254	0.0751413	0.610262	0.077925	2.97009	0.242562	0.565853	0.0745845	0.565023	0.0746163	0.572377	0.0760115	0.573772	0.0759563	0.579539	0.0759245	0.576597	0.0767237	0.578754	0.0763646	0.581021	0.0772218	0.603683	0.0783158	0.609049	0.0784399	0.599709	0.0788987	0.620981	0.0791929	0.619454	0.0791531	0.622936	0.079833	0.624895	0.0793391	0.620762	0.0795136	0.622348	0.07956	0.62575	0.0798258	0.632208	0.0808482	0.632902	0.0804861	0.624441	0.0804634
Inverse Plot	FALSE	0.585656	0.0758881	0.743328	0.0914905	3.83441	0.281716	0.558992	0.0741866	0.559112	0.0741441	0.563495	0.0755051	0.566271	0.0755031	0.570828	0.0756474	0.567083	0.0763324	0.572265	0.0757443	0.572176	0.0769537	0.596077	0.0777655	0.603774	0.0780244	0.593886	0.0785106	0.613845	0.0786024	0.614258	0.0788356	0.614352	0.079342	0.618038	0.0790792	0.614136	0.0792556	0.617192	0.0793029	0.621317	0.0794634	0.623517	0.080273	0.625287	0.0801677	0.619196	0.0801642
Color Plot	FALSE	0.607744	0.0768107	0.887391	0.105227	4.8869	0.322105	0.552982	0.0737127	0.553937	0.0736137	0.555713	0.0748999	0.559699	0.0749667	0.563192	0.0752846	0.558744	0.0758388	0.566586	0.0750752	0.564424	0.0765992	0.589416	0.0771379	0.599156	0.0775584	0.588786	0.0780594	0.607598	0.0779492	0.609706	0.0784624	0.606832	0.0787589	0.612029	0.0787491	0.608329	0.0789288	0.612675	0.0789899	0.617436	0.0790607	0.615904	0.0796078	0.618613	0.0797694	0.614601	0.0798077
3D plot	FALSE	0.611873	0.077401	1.04336	0.119136	6.16853	0.363766	0.548308	0.073201	0.549916	0.0730682	0.549663	0.074245	0.554591	0.0743907	0.557251	0.0748653	0.552258	0.0752831	0.562175	0.0744114	0.558391	0.0761871	0.58424	0.0764837	0.595567	0.0770796	0.584822	0.0775816	0.602744	0.0772861	0.606168	0.0780637	0.600986	0.0781309	0.607354	0.0783755	0.603812	0.0785596	0.609162	0.0786463	0.614421	0.0786503	0.609987	0.0789065	0.613422	0.0793237	0.611028	0.0794227
Linear	FALSE	0.602809	0.077731	1.21222	0.13322	7.72917	0.40674	0.545351	0.072693	0.547376	0.0725516	0.545834	0.0735934	0.551359	0.0738218	0.553486	0.0744235	0.548149	0.0747101	0.559392	0.0738068	0.554568	0.0757508	0.580968	0.075856	0.5933	0.0766269	0.582315	0.0771159	0.599679	0.0766669	0.603929	0.0776717	0.597286	0.0775089	0.604392	0.0779887	0.60095	0.0781781	0.606937	0.0782999	0.612516	0.0782653	0.606245	0.0782259	0.610133	0.0788665	0.608767	0.0790404
Data Range	AC3:AG90	0.624807	0.0778277	1.39503	0.147481	IsoLine	IsoLine	0.54435	0.07223	0.546522	0.0721058	0.544537	0.072998	0.550265	0.0733059	0.552201	0.0739952	0.54675	0.0741663	0.558461	0.0733102	0.553262	0.0753256	0.579865	0.0753057	0.592538	0.0762369	0.581469	0.0767	0.598648	0.0761417	0.603172	0.0773184	0.596032	0.0769432	0.603382	0.0776201	0.599975	0.077815	0.606182	0.0779789	0.611876	0.077937	0.604981	0.0776212	0.609014	0.078435	0.608002	0.0786919
Filled Symbols	FALSE	0.622212	0.0781476	1.59294	0.161922			0.545386	0.0718493	0.547423	0.071767	0.545877	0.0725069	0.551398	0.072885	0.553501	0.0736148	0.548175	0.0736959	0.559457	0.0729621	0.554582	0.074946	0.581021	0.0748773	0.593342	0.0759412	0.582351	0.0763677	0.599737	0.0757531	0.603957	0.0770322	0.597327	0.0764796	0.604408	0.0772994	0.600966	0.0774999	0.606957	0.0777092	0.612553	0.077692	0.606298	0.0771414	0.610155	0.0780641	0.608793	0.0784053
ConcAge	FALSE	0.627484	0.0782044	1.80721	0.176545			0.548374	0.0715818	0.550008	0.0715626	0.549745	0.0721599	0.554667	0.0725931	0.55728	0.0733134	0.552309	0.0733368	0.5623	0.0727904	0.558418	0.0746427	0.584341	0.0746055	0.595647	0.0757638	0.584891	0.0761458	0.602857	0.0755326	0.606221	0.0768363	0.601065	0.0761558	0.607385	0.0770528	0.603843	0.0772582	0.6092	0.0775127	0.614491	0.0775502	0.610088	0.0768253	0.613463	0.0777839	0.611077	0.0782039
ConcSwap	FALSE	0.628498	0.0782126	2.03919	0.191351			0.553073	0.0714492	0.554065	0.0715092	0.555828	0.0719852	0.559806	0.0724539	0.563233	0.0731152	0.558815	0.0731182	0.56676	0.0728093	0.564461	0.0744403	0.589558	0.0745124	0.599266	0.075719	0.588883	0.0760523	0.607756	0.075498	0.609781	0.0767467	0.606943	0.075998	0.612072	0.0769001	0.608373	0.0771095	0.612728	0.0774053	0.617533	0.077523	0.616045	0.0766985	0.618671	0.077617	0.614669	0.0781039
1st Symbol-row	1	0.624245	0.0784064	2.29034	0.206344			0.559102	0.0714623	0.559266	0.071611	0.563634	0.0719969	0.5664	0.0724786	0.570876	0.0730364	0.567168	0.0730577	0.572475	0.073017	0.572222	0.0743552	0.596248	0.0746054	0.603907	0.0758105	0.594003	0.0760949	0.614035	0.0756521	0.614348	0.0767706	0.614485	0.0760189	0.618091	0.0768537	0.614189	0.0770659	0.617256	0.0773957	0.621434	0.0776126	0.623686	0.0767714	0.625356	0.0775769	0.619278	0.0781135
		0.625071	0.0786125	2.56225	0.221526			0.565973	0.0716199	0.565191	0.0718599	0.572528	0.072194	0.573913	0.0726652	0.579591	0.0730833	0.57669	0.0731604	0.578982	0.0733969	0.58107	0.0743943	0.603869	0.0748772	0.609194	0.0760309	0.599836	0.07627	0.621188	0.0759826	0.619551	0.0769061	0.623081	0.0762169	0.624952	0.0769174	0.62082	0.0771309	0.622417	0.0774846	0.625877	0.0778117	0.632393	0.0770379	0.632977	0.077667	0.62453	0.078232
		0.628126	0.0789651	2.85662	0.236899			0.573129	0.0719094	0.571359	0.0722356	0.581792	0.0725606	0.581737	0.0729987	0.588672	0.0732521	0.58661	0.0734178	0.585755	0.0739181	0.59029	0.0745544	0.611804	0.0753055	0.614697	0.0763622	0.60591	0.0765634	0.628633	0.0764624	0.624971	0.0771421	0.632033	0.0765759	0.632101	0.0770861	0.627728	0.0772992	0.627794	0.077665	0.630503	0.0781044	0.641459	0.0774766	0.640917	0.0778799	0.63	0.0784496
		0.636834	0.0791624	3.17532	0.252465			0.57999	0.0723072	0.57727	0.0727078	0.590675	0.0730671	0.589239	0.0734519	0.597383	0.0735292	0.596124	0.0738092	0.592243	0.0745384	0.599135	0.0748225	0.61941	0.0758558	0.619972	0.0767777	0.611733	0.0769515	0.635769	0.0770529	0.630167	0.0774596	0.640617	0.0770668	0.638958	0.077346	0.634353	0.0775573	0.632949	0.0779221	0.634935	0.0784667	0.65015	0.0780518	0.648533	0.0781984	0.635246	0.0787488
		0.63691	0.079183	3.52035	0.268227			0.586001	0.0727811	0.582446	0.0732382	0.598456	0.0736722	0.59581	0.0739883	0.605018	0.0738921	0.604463	0.0743027	0.597923	0.0752075	0.606887	0.075177	0.626071	0.0764835	0.62459	0.0772437	0.616833	0.0774027	0.642016	0.0777062	0.634718	0.0778328	0.648137	0.0776499	0.644967	0.0776761	0.64016	0.0778841	0.637467	0.0782351	0.638816	0.0788694	0.657763	0.078717	0.655206	0.0785967	0.639841	0.0791053
		0.627221	0.0794565	3.8939	0.284187			0.590674	0.0732928	0.586466	0.0737837	0.604507	0.0743271	0.600919	0.0745643	0.610959	0.0743114	0.610949	0.0748585	0.602333	0.0758713	0.61292	0.0755891	0.631247	0.0771377	0.628178	0.0777225	0.620797	0.0778805	0.646869	0.0783693	0.638257	0.0782315	0.653983	0.0782779	0.649642	0.0780497	0.644678	0.0782533	0.64098	0.0785787	0.641831	0.0792799	0.66368	0.0794183	0.660397	0.0790424	0.643413	0.0794903
		0.641475	0.0794755	4.29831	0.300349			0.593631	0.0738008	0.589006	0.0743003	0.608335	0.0749787	0.604151	0.0751332	0.614725	0.0747531	0.615058	0.0754315	0.605116	0.0764759	0.616744	0.0760254	0.634519	0.0777653	0.630446	0.0781752	0.623304	0.0783462	0.649935	0.0789885	0.640495	0.0786234	0.657683	0.0789	0.652604	0.0784365	0.64754	0.0786348	0.643204	0.078925	0.643736	0.0796649	0.667422	0.0800989	0.663686	0.0794996	0.645674	0.0798725
		0.640464	0.0796982	4.73615	0.316713			0.594633	0.0742638	0.58986	0.0747461	0.609632	0.0755742	0.605245	0.0756491	0.616009	0.0751815	0.616457	0.0759753	0.606048	0.0769724	0.618049	0.0764506	0.635622	0.0783157	0.631208	0.0785652	0.62415	0.0787621	0.650965	0.0795137	0.641253	0.0789768	0.658937	0.0794657	0.653614	0.0788051	0.648514	0.0789979	0.643959	0.079246	0.644376	0.0799931	0.668686	0.0807036	0.664805	0.0799311	0.64644	0.0802211
		0.640361	0.0797082	5.21016	0.333284			Black	Black	Black	Black	Black	Black	Black	Black	Black	Black	Black	Black	Black	Black	Black	Black	Black	Black	Black	Black	Black	Black	Black	Black	Black	Black	Black	Black	Black	Black	Black	Black	Black	Black	Black	Black	Black	Black	Black	Black	Black	Black
		0.640871	0.0797906	5.72335	0.350063
		0.639661	0.0800568	6.27895	0.367054
		0.635254	0.0802006	6.88046	0.384258
		0.638321	0.0802402	7.53167	0.401678
		0.634068	0.0803402	8.2367	0.419318
		0.636646	0.0806498	8.99999	0.43718
		0.634938	0.0807103	9	0.43718
		0.638338	0.0807448	IsoLine	IsoLine
		0.648148	0.0807923
		0.650393	0.0808423
		0.64957	0.0809467
		0.632827	0.0810012
		0.650782	0.0811109
		0.650308	0.0812891
		0.64449	0.0814669
		0.645009	0.0814888
		0.647465	0.081531
		0.644565	0.0815708
		0.646203	0.0816096
		0.655349	0.0816271
		0.658105	0.0818975
		0.663809	0.0819553
		0.648676	0.0820285
		0.649881	0.0821647
		0.65158	0.0822481
		0.661339	0.0822527
		0.65843	0.082325
		0.663055	0.0825168
		0.663076	0.0826277
		0.663909	0.0827272
		0.67404	0.0827853
		0.674515	0.0829172
		0.66652	0.0829872
		0.656606	0.083071
		0.668474	0.0831103
		0.669427	0.0832828
		0.670336	0.0833064
		0.679016	0.0846467
		0.683311	0.0851073
		0.686172	0.0855361
		0.689076	0.0857346
		0.69097	0.0859404
		0.691533	0.0860719
		0.694912	0.0862535
		0.696904	0.0865796
		0.697494	0.086898
		0.69859	0.0869546
		0.700096	0.0871939
		0.702561	0.0872807
		0.70471	0.0875954
		0.718173	0.0879698
		0.710874	0.0881934
		0.721871	0.0888274
		0.717562	0.0892271
		0.708311	0.0894283
		0.727091	0.0896148
		0.730467	0.0900168
		0.733121	0.0913329
		0.857954	0.102055
		1.05279	0.117041
		1.2879	0.139068
		5.05491	0.326795
		6.51114	0.373781
		6.61763	0.375159
		IsoLine	IsoLine
[truncated: 134 more columns]

## Sheet: PlotDat7
Source sheet	all data	0.569491	0.0732469	0.543504	0.0706383	0.558806	0.0723004	0.574259	0.0739651	0.589866	0.0756324	0.605627	0.0773023	0.621545	0.0789747	0.536563	0.07	0.537708	0.07	0.535424	0.07	0.542391	0.0706383	0.594633	0.0742638	0.58986	0.0747461	0.609632	0.0755742	0.605245	0.0756491	0.616457	0.0759753	0.606048	0.0769724	0.587964	0.074822
Plot name	Concordia2	0.568191	0.0734259	0.543459	0.0706652	0.558759	0.072328	0.574211	0.0739934	0.589816	0.0756613	0.605576	0.0773318	0.621492	0.079005	0.536563	0.07	0.539383	0.0701832	0.536563	0.0701253	0.557657	0.0723004	0.594379	0.0744624	0.589638	0.074927	0.609486	0.0757466	0.604967	0.075869	0.616304	0.0761375	0.6058	0.0771633	0.587781	0.0749462
Plot Type	1	0.577085	0.0742861	0.543327	0.07069	0.558623	0.0723534	0.574071	0.0740194	0.589672	0.0756879	0.605427	0.077359	0.621338	0.0790328	0.539383	0.0703091	0.542208	0.0704919	0.539383	0.0704349	0.573073	0.0739651	0.593642	0.0746372	0.588998	0.0750787	0.609064	0.0759066	0.60416	0.0760619	0.615855	0.0762906	0.605094	0.0773147	0.587252	0.0750494
1st free col	39	0.577755	0.0744775	0.54312	0.0707106	0.558409	0.0723745	0.57385	0.0740409	0.589443	0.07571	0.605192	0.0773816	0.621096	0.0790559	0.542208	0.0706183	0.545039	0.0708006	0.542208	0.0707447	0.588642	0.0756324	0.592434	0.074785	0.587952	0.0751983	0.608369	0.0760527	0.602839	0.076224	0.615113	0.0764333	0.603944	0.0774239	0.58639	0.0751288
Sigma Level	2	0.581603	0.0750708	0.542853	0.0707253	0.558134	0.0723896	0.573566	0.0740564	0.58915	0.0757258	0.604889	0.0773978	0.620784	0.0790724	0.545039	0.0709275	0.547875	0.0711093	0.545039	0.0710545	0.604365	0.0773023	0.59078	0.0749029	0.586523	0.0752833	0.607407	0.0761838	0.60103	0.076352	0.614086	0.0765644	0.602371	0.0774886	0.585219	0.0751821
Absolute Errs	FALSE	0.582254	0.0751413	0.54255	0.070733	0.55782	0.0723974	0.573242	0.0740644	0.588816	0.075734	0.604545	0.0774062	0.620429	0.079081	0.547875	0.0712369	0.550715	0.0714182	0.547875	0.0713645	0.620244	0.0789747	0.588712	0.0749885	0.584736	0.0753322	0.606186	0.0762987	0.598768	0.0764436	0.612782	0.0766828	0.600407	0.0775077	0.583772	0.075208
Symbol Type	1	IsoLine	IsoLine	0.542233	0.070733	0.557493	0.0723974	0.572904	0.0740644	0.588468	0.075734	0.604185	0.0774062	0.620058	0.079081	0.550715	0.0715464	0.553562	0.0717272	0.550715	0.0716745	IsoLine	IsoLine	0.586269	0.0750402	0.582628	0.075344	0.604717	0.0763964	0.596096	0.0764969	0.611212	0.0767874	0.598089	0.0774807	0.582087	0.0752057
Inverse Plot	FALSE			0.541929	0.0707253	0.557179	0.0723896	0.57258	0.0740564	0.588133	0.0757258	0.603841	0.0773978	0.619703	0.0790724	0.553562	0.0718559	0.556413	0.0720362	0.553562	0.0719846			0.5835	0.0750571	0.580238	0.0753185	0.603012	0.0764761	0.593068	0.0765109	0.609389	0.0768773	0.595464	0.0774081	0.58021	0.0751753
Color Plot	FALSE			0.541663	0.0707106	0.556904	0.0723745	0.572296	0.0740409	0.58784	0.07571	0.603538	0.0773816	0.619391	0.0790559	0.556413	0.0721655	0.55927	0.0723454	0.556413	0.0722948			0.580458	0.0750387	0.577614	0.0752561	0.601086	0.0765371	0.589742	0.0764853	0.607329	0.0769518	0.592581	0.0772914	0.578193	0.0751176
3D plot	FALSE			0.541455	0.07069	0.55669	0.0723534	0.572075	0.0740194	0.587612	0.0756879	0.603303	0.077359	0.619149	0.0790328	0.55927	0.0724752	0.562132	0.0726546	0.55927	0.0726051			0.577203	0.0749854	0.574807	0.0751581	0.598955	0.076579	0.586182	0.0764207	0.605049	0.0770103	0.589497	0.0771329	0.576091	0.0750342
Linear	FALSE			0.541324	0.0706652	0.556554	0.072328	0.571935	0.0739934	0.587468	0.0756613	0.603154	0.0773318	0.618995	0.079005	0.562132	0.072785	0.564999	0.0729639	0.562132	0.0729155			0.573797	0.0748983	0.57187	0.0750264	0.596638	0.0766012	0.582459	0.0763182	0.60257	0.0770523	0.586272	0.0769357	0.57396	0.0749274
Data Range	AC3:AG9			0.541279	0.0706383	0.556508	0.0723004	0.571887	0.0739651	0.587418	0.0756324	0.603103	0.0773023	0.618942	0.0789747	0.564999	0.0730949	0.567871	0.0732733	0.564999	0.0732259			0.570308	0.074779	0.568863	0.0748635	0.594154	0.0766037	0.578643	0.0761799	0.599912	0.0770773	0.582969	0.0767035	0.57186	0.0748
Filled Symbols	FALSE			0.541324	0.0706113	0.556554	0.0722728	0.571935	0.0739368	0.587468	0.0756034	0.603154	0.0772727	0.618995	0.0789445	0.567871	0.0734049	0.570749	0.0735828	0.567871	0.0735365			0.566803	0.0746299	0.565842	0.0746727	0.591524	0.0765864	0.574811	0.0760084	0.597097	0.0770852	0.579652	0.0764408	0.569848	0.0746556
ConcAge	TRUE			0.541455	0.0705865	0.55669	0.0722474	0.572075	0.0739108	0.587612	0.0755769	0.603303	0.0772455	0.619149	0.0789166	0.570749	0.073715	0.573632	0.0738924	0.570749	0.0738471			0.56335	0.0744539	0.562866	0.0744576	0.588771	0.0765496	0.571036	0.0758072	0.59415	0.077076	0.576386	0.0761529	0.567977	0.0744981
ConcSwap	FALSE			0.541663	0.070566	0.556904	0.0722263	0.572296	0.0738893	0.58784	0.0755548	0.603538	0.0772229	0.619391	0.0788935	0.573632	0.0740252	0.57652	0.0742021	0.573632	0.0741579			0.560017	0.0742544	0.559995	0.0742224	0.585918	0.0764933	0.567391	0.0755801	0.591097	0.0770496	0.573234	0.0758454	0.5663	0.0743318
1st Symbol-row	1			0.541929	0.0705512	0.557179	0.0722112	0.57258	0.0738738	0.588133	0.075539	0.603841	0.0772067	0.619703	0.078877	0.57652	0.0743354	0.579413	0.0745119	0.57652	0.0744687			0.556868	0.0740353	0.557283	0.0739717	0.58299	0.0764183	0.563949	0.0753315	0.587962	0.0770063	0.570258	0.0755241	0.564863	0.0741612
				0.542233	0.0705436	0.557493	0.0722034	0.572904	0.0738658	0.588468	0.0755307	0.604185	0.0771983	0.620058	0.0788684	0.579413	0.0746458	0.582312	0.0748217	0.579413	0.0747796			0.553965	0.0738009	0.554783	0.0737104	0.580012	0.0763251	0.560775	0.0750663	0.584773	0.0769466	0.567515	0.0751953	0.563703	0.073991
				0.54255	0.0705436	0.55782	0.0722034	0.573242	0.0738658	0.588816	0.0755307	0.604545	0.0771983	0.620429	0.0788684	0.582312	0.0749562	0.585216	0.0751317	0.582312	0.0750906			0.551364	0.0735556	0.552545	0.0734435	0.577008	0.0762145	0.557931	0.0747896	0.581557	0.0768708	0.565058	0.0748655	0.562853	0.0738258
				0.542853	0.0705512	0.558134	0.0722112	0.573566	0.0738738	0.58915	0.075539	0.604889	0.0772067	0.620784	0.078877	0.585216	0.0752667	0.588126	0.0754417	0.585216	0.0754017			0.549116	0.0733044	0.55061	0.0731764	0.574006	0.0760874	0.555473	0.0745069	0.578341	0.0767797	0.562937	0.0745411	0.562337	0.0736702
				0.54312	0.070566	0.558409	0.0722263	0.57385	0.0738893	0.589443	0.0755548	0.605192	0.0772229	0.621096	0.0788935	0.588126	0.0755773	0.591041	0.0757518	0.588126	0.0757129			0.547265	0.073052	0.549018	0.072914	0.571029	0.0759449	0.553449	0.0742236	0.575153	0.0766739	0.561192	0.0742284	0.562168	0.0735283
				0.543327	0.0705865	0.558623	0.0722474	0.574071	0.0739108	0.589672	0.0755769	0.605427	0.0772455	0.621338	0.0789166	0.591041	0.075888	0.593961	0.0760621	0.591041	0.0760242			0.545846	0.0728035	0.5478	0.0726616	0.568104	0.0757883	0.551899	0.0739452	0.572021	0.0765546	0.559856	0.0739334	0.56235	0.0734041
				0.543459	0.0706113	0.558759	0.0722728	0.574211	0.0739368	0.589816	0.0756034	0.605576	0.0772727	0.621492	0.0789445	0.593961	0.0761988	0.596886	0.0763724	0.593961	0.0763356			0.544887	0.0725635	0.546978	0.0724242	0.565256	0.0756189	0.550851	0.0736772	0.56897	0.0764225	0.558957	0.0736619	0.56288	0.0733009
				0.543504	0.0706383	0.558806	0.0723004	0.574259	0.0739651	0.589866	0.0756324	0.605627	0.0773023	0.621545	0.0789747	0.596886	0.0765097	0.599817	0.0766828	0.596886	0.076647			0.544407	0.0723369	0.546569	0.0722062	0.562509	0.0754381	0.550327	0.0734248	0.566026	0.0762789	0.558511	0.0734193	0.563742	0.0732215
				ConcTikEll	ConcTikEll	ConcTikEll	ConcTikEll	ConcTikEll	ConcTikEll	ConcTikEll	ConcTikEll	ConcTikEll	ConcTikEll	ConcTikEll	ConcTikEll	0.599817	0.0768207	0.602753	0.0769932	0.599817	0.0769586			0.544416	0.072128	0.54658	0.0720119	0.559886	0.0752475	0.550337	0.0731928	0.563216	0.076125	0.558527	0.0732101	0.564912	0.0731682
																0.602753	0.0771317	0.605695	0.0773038	0.602753	0.0772702			0.544912	0.0719408	0.547013	0.0718452	0.55741	0.0750487	0.55088	0.0729859	0.560563	0.0759622	0.559005	0.0730386	0.56636	0.0731423
																0.605695	0.0774429	0.608642	0.0776145	0.605695	0.077582			0.545887	0.0717791	0.547858	0.0717092	0.555101	0.0748434	0.551947	0.072808	0.558089	0.0757917	0.559935	0.0729079	0.568045	0.0731446
																0.608642	0.0777541	0.611595	0.0779252	0.608642	0.0778938			0.547321	0.071646	0.549098	0.0716067	0.552981	0.0746333	0.553516	0.0726626	0.555815	0.075615	0.5613	0.0728208	0.569922	0.073175
																0.611595	0.0780655	0.614553	0.0782361	0.611595	0.0782057			0.549187	0.071544	0.55071	0.0715395	0.551065	0.0744202	0.555557	0.0725525	0.553762	0.0754338	0.563073	0.0727788	0.571939	0.0732327
																0.614553	0.0783769	0.617516	0.078547	0.614553	0.0785177			0.551448	0.0714751	0.552662	0.0715091	0.549372	0.0742061	0.558029	0.0724799	0.551946	0.0752494	0.565219	0.0727828	0.574041	0.0733161
																0.617516	0.0786884	0.620485	0.078858	0.617516	0.0788298			0.554061	0.0714407	0.554917	0.071516	0.547916	0.0739926	0.560886	0.0724462	0.550384	0.0750635	0.567696	0.0728327	0.576171	0.0734229
																0.620485	0.079	0.621842	0.079	0.619135	0.079			0.556973	0.0714415	0.55743	0.07156	0.546708	0.0737816	0.564071	0.072452	0.549087	0.0748776	0.570457	0.0729275	0.578271	0.0735503
																0.620485	0.079	ConcBand	ConcBand	ConcBand	ConcBand			0.560129	0.0714775	0.560152	0.0716404	0.545759	0.0735749	0.567523	0.0724972	0.548068	0.0746935	0.573448	0.0730654	0.580284	0.0736947
																IsoLine	IsoLine							0.563468	0.0715478	0.563031	0.0717556	0.545078	0.0733742	0.571173	0.072581	0.547335	0.0745125	0.57661	0.0732438	0.582154	0.0738522
																								0.566924	0.0716513	0.56601	0.0719032	0.544669	0.0731814	0.574952	0.0727017	0.546895	0.0743363	0.579882	0.073459	0.583831	0.0740185
																								0.570429	0.0717858	0.569032	0.0720805	0.544537	0.072998	0.578785	0.0728569	0.54675	0.0741663	0.5832	0.073707	0.585269	0.0741891
																								0.573917	0.0719487	0.572037	0.072284	0.544683	0.0728255	0.582598	0.0730437	0.546903	0.0740041	0.5865	0.073983	0.586429	0.0743593
																								0.577318	0.0721369	0.574968	0.0725097	0.545106	0.0726656	0.586317	0.0732584	0.547352	0.073851	0.589717	0.0742814	0.587278	0.0745245
																								0.580567	0.0723467	0.577766	0.0727532	0.545801	0.0725194	0.589869	0.0734968	0.548094	0.0737083	0.592788	0.0745967	0.587795	0.0746801
																								0.5836	0.0725741	0.580379	0.0730098	0.546763	0.0723883	0.593186	0.0737544	0.549121	0.0735772	0.595655	0.0749225	0.587964	0.074822
																								0.586359	0.0728145	0.582754	0.0732745	0.547984	0.0722735	0.596202	0.074026	0.550425	0.0734588	0.598261	0.0752525
																								0.58879	0.0730633	0.584845	0.0735422	0.549453	0.0721757	0.598859	0.0743063	0.551995	0.0733542	0.600555	0.0755804
																								0.590844	0.0733158	0.586613	0.0738076	0.551157	0.072096	0.601105	0.07459	0.553818	0.0732643	0.602493	0.0758998
																								0.592484	0.0735668	0.588021	0.0740656	0.553083	0.072035	0.602897	0.0748716	0.555878	0.0731898	0.604038	0.0762044
																								0.593675	0.0738117	0.589044	0.0743111	0.555214	0.0719932	0.604199	0.0751454	0.558158	0.0731313	0.605158	0.0764883
																								0.594396	0.0740455	0.589661	0.0745394	0.557532	0.0719709	0.604987	0.0754063	0.560637	0.0730893	0.605832	0.076746
																								0.594633	0.0742638	0.58986	0.0747461	0.560016	0.0719684	0.605245	0.0756491	0.563295	0.0730643	0.606048	0.0769724
																								Black	Black	Black	Black	0.562645	0.0719857	Black	Black	0.56611	0.0730564	Black	Black
																												0.565398	0.0720226			0.569057	0.0730656
																												0.568251	0.0720788			0.57211	0.073092
																												0.571179	0.0721538			0.575245	0.0731353
																												0.574158	0.0722471			0.578434	0.073195
																												0.577161	0.0723577			0.58165	0.0732708
																												0.580164	0.0724848			0.584866	0.0733619
																												0.58314	0.0726272			0.588054	0.0734676
																												0.586065	0.0727838			0.591186	0.073587
																												0.588913	0.0729532			0.594237	0.0737191
																												0.591661	0.073134			0.597181	0.0738627
																												0.594284	0.0733246			0.599991	0.0740165
																												0.59676	0.0735235			0.602644	0.0741794
																												0.599068	0.0737288			0.605118	0.0743499
																												0.601189	0.0739389			0.607392	0.0745266
																												0.603104	0.0741519			0.609445	0.0747078
																												0.604797	0.0743661			0.611261	0.0748922
																												0.606254	0.0745796			0.612823	0.0750781
																												0.607462	0.0747906			0.61412	0.0752639
																												0.60841	0.0749973			0.615139	0.0754481
																												0.609092	0.0751979			0.615872	0.0756291
																												0.6095	0.0753908			0.616312	0.0758053
																												0.609632	0.0755742			0.616457	0.0759753
																												Black	Black			Black	Black

## Sheet: PlotDat8
Source sheet	all data	0.569491	0.0732469	0.45	0.0602713	0.482812	0.0640155	0.594633	0.0742638	0.58986	0.0747461	0.609632	0.0755742	0.605245	0.0756491	0.616457	0.0759753	0.606048	0.0769724	0.618049	0.0764506	0.635622	0.0783157	0.631208	0.0785652	0.62415	0.0787621	0.650965	0.0795137	0.641253	0.0789768	0.658937	0.0794657	0.653614	0.0788051	0.648514	0.0789979	0.643959	0.079246	0.644376	0.0799931	0.668686	0.0807036	0.664805	0.0799311	0.64644	0.0802211	0.671787	0.0800227
Plot name	Concordia0	0.568191	0.0734259	0.452903	0.0606061	0.512308	0.0673218	0.594071	0.074553	0.589369	0.0750067	0.608905	0.075947	0.604629	0.0759691	0.615685	0.0763297	0.605504	0.0772441	0.617336	0.0767353	0.634993	0.0786439	0.63077	0.0787928	0.623671	0.0790156	0.650372	0.079814	0.640826	0.0791947	0.658234	0.0798179	0.653059	0.0790465	0.647978	0.0792352	0.643539	0.0794501	0.644008	0.0801822	0.66797	0.0810701	0.664188	0.0802108	0.646011	0.0804387	0.67112	0.0802859
Plot Type	1	0.577085	0.0742861	0.462805	0.0617414	0.542391	0.0706383	0.592434	0.074785	0.587952	0.0751983	0.606787	0.0762472	0.602839	0.076224	0.613424	0.0766292	0.603944	0.0774239	0.615238	0.0769829	0.633174	0.0788921	0.629507	0.0789595	0.622279	0.079213	0.648661	0.0800275	0.639587	0.0793668	0.656188	0.0800996	0.65143	0.0792515	0.646404	0.0794363	0.642312	0.0796176	0.642945	0.080318	0.665894	0.0813532	0.662378	0.0804456	0.64476	0.0806134	0.669157	0.0805137
1st free col	241	0.577755	0.0744775	0.472774	0.0628778	0.573073	0.0739651	0.589795	0.0749498	0.585672	0.0753124	0.603371	0.0764617	0.599953	0.0764025	0.609773	0.0768605	0.601436	0.0775039	0.611848	0.0771827	0.630243	0.0790492	0.627472	0.0790581	0.620037	0.0793457	0.645908	0.0801449	0.637587	0.0794856	0.652887	0.0802985	0.6488	0.079411	0.643862	0.0795924	0.640331	0.0797412	0.641235	0.0803948	0.662548	0.0815406	0.659455	0.0806253	0.642743	0.0807376	0.665984	0.0806961
Sigma Level	2	0.581603	0.0750708	0.482812	0.0640155	0.604365	0.0773023	0.586269	0.0750402	0.582628	0.075344	0.598806	0.0765811	0.596096	0.0764969	0.60489	0.0770136	0.598089	0.0774807	0.607313	0.0773259	0.626328	0.0791086	0.624756	0.0790843	0.617042	0.0794077	0.642233	0.080161	0.634916	0.0795459	0.648476	0.0804058	0.645282	0.0795182	0.640463	0.0796966	0.637684	0.0798154	0.638952	0.080409	0.658078	0.081624	0.655547	0.0807419	0.640048	0.0808057	0.66174	0.0808252
Absolute Errs	FALSE	0.582254	0.0751413	0.492917	0.0651545	0.636279	0.0806498	0.582009	0.0750523	0.578952	0.0752918	0.593292	0.0766002	0.591438	0.076503	0.59899	0.0770819	0.594051	0.0773552	0.601831	0.0774063	0.621602	0.0790675	0.621477	0.079037	0.613424	0.0793965	0.637796	0.0800751	0.63169	0.0795452	0.643147	0.080417	0.641031	0.0795683	0.636354	0.0797445	0.634485	0.0798371	0.636196	0.0803602	0.652679	0.0815999	0.650824	0.0807903	0.636792	0.0808149	0.656611	0.0808953
Symbol Type	1	0.585656	0.0758881	0.503092	0.0662946	0.668829	0.0840077	0.577203	0.0749854	0.574807	0.0751581	0.58707	0.0765181	0.586182	0.0764207	0.592329	0.0770622	0.589497	0.0771329	0.595642	0.0774203	0.616269	0.0789277	0.617778	0.0789181	0.609343	0.0793125	0.632791	0.079891	0.628049	0.0794833	0.637134	0.0803314	0.636232	0.0795591	0.631717	0.0797339	0.630874	0.0798053	0.633087	0.0802503	0.646588	0.0814692	0.645493	0.0807686	0.633117	0.0807648	0.65082	0.0809033
Inverse Plot	FALSE	0.607744	0.0768107	0.513336	0.067436	0.702025	0.087376	0.572059	0.0748425	0.570372	0.0749487	0.580411	0.0763385	0.580558	0.0762533	0.5852	0.0769555	0.584627	0.0768237	0.589017	0.0773674	0.610564	0.0786955	0.613821	0.078733	0.604976	0.0791594	0.627437	0.0796167	0.624153	0.0793631	0.630699	0.0801529	0.631095	0.0794911	0.626752	0.0796653	0.62701	0.0797213	0.629761	0.0800843	0.64007	0.0812377	0.639787	0.0806775	0.629185	0.0806574	0.64462	0.0808489
Color Plot	FALSE	0.611873	0.077401	0.523649	0.0685786	0.735883	0.0907549	0.566803	0.0746299	0.565842	0.0746727	0.573607	0.0760692	0.574811	0.0760084	0.577914	0.0767664	0.579652	0.0764408	0.582245	0.0772498	0.604736	0.0783809	0.609779	0.0784896	0.600515	0.0789439	0.621969	0.0792643	0.620173	0.0791897	0.624124	0.0798892	0.625844	0.0793673	0.621679	0.0795416	0.623061	0.0795888	0.626364	0.0798694	0.633412	0.0809155	0.633956	0.0805211	0.625167	0.0804976	0.638283	0.0807345
3D plot	FALSE	0.602809	0.077731	0.534033	0.0697224	0.770413	0.0941442	0.561665	0.0743569	0.561414	0.0743422	0.566954	0.075722	0.569193	0.0756966	0.570789	0.0765032	0.574792	0.0760012	0.575622	0.0770727	0.599039	0.0779976	0.605828	0.0781986	0.596154	0.0786753	0.616624	0.078849	0.616281	0.0789708	0.617696	0.0795519	0.620709	0.0791929	0.616717	0.0793684	0.6192	0.0794137	0.623044	0.079615	0.626902	0.0805167	0.628253	0.0803062	0.621239	0.0802922	0.632086	0.0805651
Linear	FALSE	0.624807	0.0778277	0.544488	0.0708674	0.805631	0.097544	0.556868	0.0740353	0.557283	0.0739717	0.560745	0.075312	0.563949	0.0753315	0.564137	0.0761774	0.570258	0.0755241	0.569438	0.0768438	0.593723	0.0775625	0.602142	0.0778728	0.592083	0.0783655	0.611637	0.0783891	0.612649	0.078716	0.611695	0.0791557	0.615915	0.0789757	0.612084	0.0791531	0.615596	0.0792036	0.619946	0.0793321	0.620827	0.0800587	0.622929	0.0800423	0.617572	0.0800504	0.626299	0.080348
Data Range	AC3:AG90	0.622212	0.0781476	0.555014	0.0720136	IsoLine	IsoLine	0.552624	0.0736793	0.553628	0.0735773	0.55525	0.0748572	0.559308	0.0749291	0.558248	0.0758032	0.566247	0.0750302	0.563962	0.0765732	0.589019	0.0770945	0.598881	0.0775264	0.588482	0.078028	0.607226	0.0779047	0.609435	0.0784362	0.606384	0.0787179	0.611671	0.0787252	0.607983	0.0789051	0.612406	0.0789676	0.617205	0.0790332	0.615451	0.0795615	0.618215	0.0797408	0.614327	0.0797825	0.621175	0.0800929
Filled Symbols	FALSE	0.627484	0.0782044	0.565612	0.0731611			0.549116	0.0733044	0.55061	0.0731764	0.550709	0.0743774	0.555473	0.0745069	0.553379	0.0753971	0.562937	0.0745411	0.559434	0.0762726	0.585134	0.0766141	0.596187	0.0771745	0.585507	0.0776774	0.603583	0.0774169	0.606779	0.0781439	0.601996	0.0782577	0.608162	0.0784523	0.604593	0.0786354	0.609769	0.0787161	0.614942	0.0787314	0.61101	0.0790469	0.614319	0.0794149	0.611646	0.0795005	0.616939	0.0798107
ConcAge	FALSE	0.628498	0.0782126	0.576282	0.0743098			0.546499	0.072927	0.548361	0.0727863	0.54732	0.0738937	0.552613	0.0740834	0.549745	0.0749767	0.560471	0.0740783	0.556053	0.0759552	0.582237	0.0761423	0.59418	0.0768325	0.583288	0.0773292	0.600867	0.0769471	0.604798	0.0778517	0.598722	0.0777952	0.605542	0.0781689	0.602061	0.0783557	0.607801	0.0784601	0.613255	0.0784397	0.607697	0.0785373	0.61141	0.0790789	0.609645	0.0792165	0.613775	0.0795139
ConcSwap	FALSE	0.624245	0.0784064	0.587024	0.0754598			0.544887	0.0725635	0.546978	0.0724242	0.545233	0.073427	0.550851	0.0736772	0.547502	0.0745603	0.558957	0.0736619	0.553965	0.0756349	0.580455	0.0756997	0.592945	0.0765153	0.581922	0.0769986	0.599198	0.0765157	0.603578	0.0775725	0.596704	0.0773505	0.603925	0.0778874	0.600499	0.0780782	0.606588	0.0782107	0.612218	0.078171	0.605658	0.0780551	0.609616	0.0787474	0.608412	0.078943	0.611821	0.0792154
1st Symbol-row	1	0.625071	0.0786125	0.59784	0.076611			0.54435	0.07223	0.546522	0.0721058	0.544537	0.072998	0.550265	0.0733059	0.54675	0.0741663	0.558461	0.0733102	0.553262	0.0753256	0.579865	0.0753057	0.592538	0.0762369	0.581469	0.0767	0.598648	0.0761417	0.603172	0.0773184	0.596032	0.0769432	0.603382	0.0776201	0.599975	0.077815	0.606182	0.0779789	0.611876	0.077937	0.604981	0.0776212	0.609014	0.078435	0.608002	0.0786919	0.611164	0.0789282
		0.628126	0.0789651	0.60873	0.0777634			0.544912	0.0719408	0.547013	0.0718452	0.545265	0.0726252	0.55088	0.0729859	0.547522	0.0738119	0.559005	0.0730386	0.553975	0.0750409	0.580494	0.0749774	0.592975	0.0760093	0.581948	0.0764465	0.599242	0.0758414	0.603598	0.0771005	0.596735	0.0765909	0.603937	0.0773787	0.600511	0.0775777	0.606602	0.0777748	0.612245	0.077748	0.605697	0.0772547	0.609632	0.0781553	0.608431	0.0784743	0.611831	0.078665
		0.636834	0.0791624	0.619693	0.078917			0.546548	0.0717088	0.54843	0.0716536	0.547382	0.072325	0.55267	0.072731	0.549783	0.0735124	0.560565	0.0728588	0.556073	0.0747933	0.582313	0.0747293	0.594239	0.0758426	0.58334	0.0762491	0.600952	0.0756278	0.604838	0.0769284	0.598781	0.0763092	0.605565	0.0771737	0.602085	0.0773766	0.607829	0.0776073	0.613307	0.0776121	0.607773	0.0769716	0.611441	0.0779205	0.609681	0.0782995	0.613794	0.0784372
		0.63691	0.079183	0.630732	0.0800719			0.549187	0.071544	0.55071	0.0715395	0.550798	0.0721105	0.555557	0.0725525	0.553434	0.0732811	0.563073	0.0727788	0.559464	0.0745935	0.585244	0.0745721	0.596273	0.075744	0.585582	0.0761164	0.603706	0.0755105	0.606837	0.0768096	0.602082	0.0761104	0.608196	0.0770142	0.604627	0.0772205	0.60981	0.0774837	0.615018	0.0775354	0.611119	0.0767842	0.614364	0.0777408	0.611698	0.0781754	0.616967	0.0782548
		0.627221	0.0794565	0.641846	0.081228			0.552714	0.0714536	0.553754	0.0715079	0.555363	0.0719911	0.559413	0.0724581	0.558317	0.0731279	0.566419	0.072802	0.563999	0.0744503	0.589159	0.0745128	0.59899	0.0757177	0.588577	0.0760544	0.607381	0.0754944	0.609508	0.0767492	0.606493	0.076003	0.611714	0.076907	0.608027	0.0771162	0.612458	0.0774095	0.617301	0.0775211	0.61559	0.0767008	0.618272	0.0776242	0.614394	0.0781072	0.621211	0.0781257
		0.641475	0.0794755	0.653035	0.0823853			0.556973	0.0714415	0.55743	0.07156	0.560877	0.071972	0.564071	0.072452	0.564217	0.0730597	0.570457	0.0729275	0.56948	0.0743699	0.593886	0.0745539	0.602269	0.0757651	0.592195	0.0760656	0.611818	0.0755803	0.612735	0.07675	0.611822	0.0759919	0.615965	0.0768569	0.612135	0.0770684	0.615657	0.0773878	0.620057	0.07757	0.620988	0.0767249	0.622995	0.0775758	0.61765	0.078098	0.62634	0.0780556
		0.640464	0.0796982	0.664301	0.0835439			0.56178	0.0715084	0.561576	0.0716938	0.5671	0.072054	0.569327	0.0725343	0.570878	0.0730794	0.575011	0.0731498	0.575669	0.0743559	0.599218	0.0746936	0.605968	0.075884	0.596276	0.0761496	0.616823	0.0757644	0.616375	0.0768118	0.617835	0.0760774	0.620764	0.0768661	0.616773	0.077079	0.619267	0.0774197	0.623166	0.0776798	0.627079	0.0768556	0.628326	0.0775975	0.621324	0.0781482	0.632131	0.0780476
		0.640361	0.0797082	0.675643	0.0847037			0.566924	0.0716513	0.56601	0.0719032	0.573759	0.0722336	0.574952	0.0727017	0.578007	0.0731861	0.579882	0.073459	0.582294	0.0744088	0.604923	0.0749259	0.609925	0.0760691	0.600643	0.0763027	0.622176	0.0760386	0.620271	0.0769321	0.62427	0.076256	0.625901	0.0769341	0.621737	0.0771476	0.623131	0.0775037	0.626492	0.0778458	0.633597	0.0770871	0.634032	0.0776886	0.625257	0.0782556	0.638331	0.078102
		0.640871	0.0797906	0.687063	0.0858648			0.57218	0.0718639	0.57054	0.0721792	0.580563	0.0725029	0.580699	0.0729466	0.585293	0.0733752	0.584856	0.0738418	0.589066	0.0745264	0.610751	0.0752405	0.613967	0.0763125	0.605104	0.0765182	0.627645	0.0763911	0.624252	0.0771054	0.630845	0.0765196	0.631152	0.0770579	0.626811	0.0772712	0.62708	0.0776361	0.629889	0.0780607	0.640256	0.0774093	0.639863	0.077845	0.629274	0.0784154	0.644668	0.0782164
		0.639661	0.0800568	0.698561	0.0870271			0.577318	0.0721369	0.574968	0.0725097	0.587215	0.0728501	0.586317	0.0732584	0.592418	0.0736384	0.589717	0.0742814	0.595689	0.0747035	0.616448	0.0756237	0.617917	0.0766034	0.609465	0.0767868	0.63299	0.0768064	0.628143	0.0773243	0.637273	0.0768569	0.636287	0.0772323	0.631772	0.0774445	0.630941	0.0778112	0.633209	0.0783152	0.646765	0.0778081	0.645566	0.0780598	0.633203	0.0786207	0.650865	0.0783858
		0.635254	0.0802006	0.710137	0.0881907			0.582114	0.0724585	0.579099	0.0728802	0.593424	0.0732601	0.591561	0.0736235	0.59907	0.0739642	0.594251	0.0747586	0.601874	0.0749324	0.621764	0.0760589	0.621604	0.0769293	0.613535	0.0770966	0.637977	0.0772663	0.631775	0.0775792	0.643274	0.0772531	0.641081	0.0774495	0.636405	0.0776598	0.634545	0.0780214	0.636307	0.078598	0.65284	0.0782661	0.65089	0.0783238	0.636869	0.0788626	0.656652	0.0786029
		0.638321	0.0802402	0.721792	0.0893555			0.586359	0.0728145	0.582754	0.0732745	0.59892	0.0737149	0.596202	0.074026	0.604959	0.0743383	0.598261	0.0752525	0.607349	0.075203	0.626468	0.0765269	0.624865	0.0772757	0.617137	0.0774341	0.642388	0.0777507	0.63499	0.0778589	0.648584	0.0776909	0.645325	0.0777	0.640506	0.0779077	0.637736	0.0782573	0.639047	0.0788969	0.658216	0.0787633	0.655604	0.0786253	0.640114	0.0791304	0.661776	0.0788581
		0.634068	0.0803402	0.733526	0.0905215			0.589867	0.0731894	0.585772	0.0736755	0.603461	0.0741947	0.600036	0.0744481	0.609828	0.0747445	0.601571	0.0757416	0.611877	0.0755036	0.630353	0.0770072	0.627558	0.0776276	0.620112	0.0777847	0.646031	0.0782385	0.637645	0.0781513	0.652973	0.0781511	0.648834	0.0779729	0.643897	0.0781774	0.640373	0.0785088	0.641311	0.0791988	0.662657	0.0792779	0.6595	0.0789512	0.642796	0.0794125	0.666012	0.0791402
		0.636646	0.0806498	0.74534	0.0916888			0.592484	0.0735668	0.588021	0.0740656	0.606849	0.0746785	0.602897	0.0748716	0.613462	0.0751649	0.604038	0.0762044	0.615258	0.075821	0.63325	0.077479	0.629566	0.0779696	0.622331	0.0781328	0.648746	0.0787083	0.639627	0.0784434	0.656247	0.0786137	0.651454	0.0782563	0.646428	0.0784572	0.642341	0.0787648	0.642998	0.0794904	0.66597	0.0797875	0.662409	0.0792872	0.644797	0.0796965	0.669176	0.079437
		0.634938	0.0807103	0.757235	0.0928574			0.594096	0.0739303	0.589404	0.0744277	0.608937	0.0751451	0.604659	0.0752778	0.615705	0.0755812	0.605552	0.0766208	0.617346	0.0761414	0.635032	0.0779216	0.630801	0.0782867	0.623697	0.0784635	0.650415	0.0791397	0.640847	0.0787227	0.658264	0.0790583	0.653071	0.0785378	0.64799	0.0787347	0.643554	0.0790142	0.644035	0.0797591	0.668009	0.0802697	0.664203	0.0796187	0.64603	0.07997	0.67113	0.0797355
		0.638338	0.0807448	0.769211	0.0940271			0.594633	0.0742638	0.58986	0.0747461	0.609632	0.0755742	0.605245	0.0756491	0.616457	0.0759753	0.606048	0.0769724	0.618049	0.0764506	0.635622	0.0783157	0.631208	0.0785652	0.62415	0.0787621	0.650965	0.0795137	0.641253	0.0789768	0.658937	0.0794657	0.653614	0.0788051	0.648514	0.0789979	0.643959	0.079246	0.644376	0.0799931	0.668686	0.0807036	0.664805	0.0799311	0.64644	0.0802211	0.671787	0.0800227
		0.648148	0.0807923	0.781269	0.0951982			Black	Black	Black	Black	Black	Black	Black	Black	Black	Black	Black	Black	Black	Black	Black	Black	Black	Black	Black	Black	Black	Black	Black	Black	Black	Black	Black	Black	Black	Black	Black	Black	Black	Black	Black	Black	Black	Black	Black	Black	Black	Black
		0.650393	0.0808423	0.793408	0.0963705
		0.64957	0.0809467	0.805631	0.097544
		0.632827	0.0810012	0.817937	0.0987189
		0.650782	0.0811109	0.830326	0.0998949
		0.650308	0.0812891	0.831439	0.1
		0.64449	0.0814669	IsoLine	IsoLine
		0.645009	0.0814888
		0.647465	0.081531
		0.644565	0.0815708
		0.646203	0.0816096
		0.655349	0.0816271
		0.658105	0.0818975
		0.663809	0.0819553
		0.648676	0.0820285
		0.649881	0.0821647
		0.65158	0.0822481
		0.661339	0.0822527
		0.65843	0.082325
		0.663055	0.0825168
		0.663076	0.0826277
		0.663909	0.0827272
		0.67404	0.0827853
		0.674515	0.0829172
		0.66652	0.0829872
		0.656606	0.083071
		0.668474	0.0831103
		0.669427	0.0832828
		0.670336	0.0833064
		0.679016	0.0846467
		0.683311	0.0851073
		0.686172	0.0855361
		0.689076	0.0857346
		0.69097	0.0859404
		0.691533	0.0860719
		0.694912	0.0862535
		0.696904	0.0865796
		0.697494	0.086898
		0.69859	0.0869546
		0.700096	0.0871939
		0.702561	0.0872807
		0.70471	0.0875954
		0.718173	0.0879698
		0.710874	0.0881934
		0.721871	0.0888274
		0.717562	0.0892271
		0.708311	0.0894283
		0.727091	0.0896148
		0.730467	0.0900168
		0.733121	0.0913329
		0.857954	0.102055
		1.05279	0.117041
		1.2879	0.139068
		5.05491	0.326795
		6.51114	0.373781
		6.61763	0.375159
		IsoLine	IsoLine
[truncated: 190 more columns]

## Sheet: PlotDat10
Source sheet	all data	0.611873	0.077401	0.589866	0.0756324	0.605627	0.0773023	0.621545	0.0789747	0.637621	0.0806498	0.653855	0.0823274	0.573398	0.074	0.574635	0.074	0.572167	0.074	0.573073	0.0739651	0.631208	0.0785652	0.62415	0.0787621	0.64644	0.0802211	0.663133	0.0813308	0.674749	0.080853	0.667933	0.0815115	0.667873	0.0812472	0.660614	0.0814269	0.642659	0.0801788
Plot name	Concordia5	0.602809	0.077731	0.589816	0.0756613	0.605576	0.0773318	0.621492	0.079005	0.637566	0.0806807	0.653799	0.082359	0.573398	0.074	0.576593	0.07421	0.573398	0.0741327	0.588642	0.0756324	0.63101	0.0787232	0.623934	0.0789368	0.646247	0.0803705	0.662852	0.0815479	0.674391	0.0810638	0.667595	0.0817656	0.667566	0.0814383	0.660359	0.0816076	0.642435	0.0803233
Plot Type	1	0.627221	0.0794565	0.589672	0.0756879	0.605427	0.077359	0.621338	0.0790328	0.637408	0.0807091	0.653636	0.0823881	0.576593	0.0743433	0.579795	0.0745527	0.576593	0.0744766	0.604365	0.0773023	0.630439	0.0788555	0.623306	0.0790881	0.645683	0.0805021	0.662035	0.0817388	0.673331	0.0812586	0.666603	0.0819919	0.666656	0.081614	0.659609	0.0817709	0.641779	0.0804473
1st free col	41	0.635254	0.0802006	0.589443	0.07571	0.605192	0.0773816	0.621096	0.0790559	0.637158	0.0807327	0.653379	0.0824122	0.579795	0.0746867	0.583004	0.0748956	0.579795	0.0748206	0.620244	0.0789747	0.629507	0.0789595	0.622279	0.079213	0.64476	0.0806134	0.660696	0.0818998	0.671589	0.0814335	0.664979	0.082186	0.665163	0.081771	0.658379	0.0819135	0.640711	0.0805475
Sigma Level	2	0.638321	0.0802402	0.58915	0.0757258	0.604889	0.0773978	0.620784	0.0790724	0.636837	0.0807496	0.653048	0.0824294	0.583004	0.0750302	0.586219	0.0752386	0.583004	0.0751648	0.636279	0.0806498	0.628231	0.0790332	0.620873	0.0793091	0.643496	0.0807022	0.658862	0.0820276	0.6692	0.0815852	0.662753	0.0823443	0.663114	0.0819061	0.656692	0.0820327	0.639258	0.0806213
Absolute Errs	FALSE	0.634068	0.0803402	0.588816	0.075734	0.604545	0.0774062	0.620429	0.079081	0.63647	0.0807584	0.652671	0.0824384	0.586219	0.0753738	0.589441	0.0755817	0.586219	0.075509	0.652474	0.0823274	0.626637	0.079075	0.619116	0.0793744	0.641915	0.0807667	0.656568	0.08212	0.66621	0.0817107	0.659968	0.0824635	0.66055	0.0820168	0.654583	0.0821261	0.63746	0.0806665
Symbol Type	1	0.636646	0.0806498	0.588468	0.075734	0.604185	0.0774062	0.620058	0.079081	0.636089	0.0807584	0.652277	0.0824384	0.589441	0.0757175	0.592669	0.0759249	0.589441	0.0758534	IsoLine	IsoLine	0.624756	0.0790843	0.617042	0.0794077	0.640048	0.0808057	0.653859	0.082175	0.662677	0.0818076	0.656679	0.0825414	0.657521	0.0821009	0.65209	0.082192	0.635367	0.080682
Inverse Plot	FALSE	0.634938	0.0807103	0.588133	0.0757258	0.603841	0.0773978	0.619703	0.0790724	0.635722	0.0807496	0.6519	0.0824294	0.592669	0.0760614	0.595903	0.0762682	0.592669	0.0761979			0.622624	0.0790609	0.61469	0.0794084	0.637931	0.0808185	0.650789	0.0821915	0.65867	0.081874	0.65295	0.0825765	0.654086	0.0821567	0.649264	0.0822291	0.633036	0.0806673
Color Plot	FALSE	IsoLine	IsoLine	0.58784	0.07571	0.603538	0.0773816	0.619391	0.0790559	0.635401	0.0807327	0.651569	0.0824122	0.595903	0.0764053	0.599145	0.0766116	0.595903	0.0765425			0.620283	0.0790051	0.612107	0.0793765	0.635606	0.0808048	0.647416	0.0821693	0.654267	0.0819086	0.648854	0.082568	0.650311	0.0821832	0.64616	0.0822366	0.63053	0.0806228
3D plot	FALSE			0.587612	0.0756879	0.603303	0.077359	0.619149	0.0790328	0.635151	0.0807091	0.651312	0.0823881	0.599145	0.0767494	0.602393	0.0769551	0.599145	0.0768872			0.617778	0.0789181	0.609343	0.0793125	0.633117	0.0807648	0.643806	0.0821088	0.649553	0.0819108	0.64447	0.0825162	0.64627	0.0821799	0.642836	0.0822144	0.627917	0.0805498
Linear	FALSE			0.587468	0.0756613	0.603154	0.0773318	0.618995	0.079005	0.634993	0.0806807	0.651148	0.082359	0.602393	0.0770935	0.605647	0.0772987	0.602393	0.077232			0.615158	0.0788016	0.606452	0.0792178	0.630514	0.0806993	0.64003	0.0820111	0.644621	0.0818804	0.639883	0.082422	0.642042	0.0821468	0.639359	0.0821629	0.625269	0.0804502
Data Range	AC12:AG33			0.587418	0.0756324	0.603103	0.0773023	0.618942	0.0789747	0.634938	0.0806498	0.651092	0.0823274	0.605647	0.0774378	0.608908	0.0776425	0.605647	0.0775769			0.612474	0.0786578	0.60349	0.0790941	0.627847	0.0806097	0.63616	0.0818782	0.639566	0.0818181	0.635184	0.0822873	0.637709	0.0820845	0.635796	0.0820831	0.622659	0.0803267
Filled Symbols	FALSE			0.587468	0.0756034	0.603154	0.0772727	0.618995	0.0789445	0.634993	0.0806188	0.651148	0.0822958	0.608908	0.0777822	0.612176	0.0779863	0.608908	0.0779219			0.609779	0.0784896	0.600515	0.0789439	0.625167	0.0804976	0.632274	0.0817126	0.634487	0.081725	0.630462	0.0821147	0.633355	0.0819943	0.632217	0.0819767	0.620156	0.0801828
ConcAge	TRUE			0.587612	0.0755769	0.603303	0.0772455	0.619149	0.0789166	0.635151	0.0805904	0.651312	0.0822668	0.612176	0.0781267	0.61545	0.0783303	0.612176	0.078267			0.607124	0.0783002	0.597584	0.07877	0.622528	0.0803652	0.628445	0.0815177	0.629483	0.0816031	0.625811	0.0819076	0.629066	0.081878	0.62869	0.0818455	0.61783	0.0800223
ConcSwap	FALSE			0.58784	0.0755548	0.603538	0.0772229	0.619391	0.0788935	0.635401	0.0805668	0.651569	0.0822427	0.61545	0.0784713	0.618731	0.0786744	0.61545	0.0786123			0.604562	0.0780932	0.594756	0.078576	0.61998	0.0802152	0.624749	0.081297	0.62465	0.0814546	0.62132	0.0816699	0.624923	0.0817377	0.625285	0.0816923	0.615745	0.0798496
1st Symbol-row	1			0.588133	0.075539	0.603841	0.0772067	0.619703	0.078877	0.635722	0.0805499	0.6519	0.0822254	0.618731	0.078816	0.622019	0.0790186	0.618731	0.0789576			0.602142	0.0778728	0.592083	0.0783655	0.617572	0.0800504	0.621257	0.0810551	0.620084	0.0812825	0.617078	0.0814064	0.621009	0.0815763	0.622067	0.08152	0.613956	0.0796695
				0.588468	0.0755307	0.604185	0.0771983	0.620058	0.0788684	0.636089	0.0805411	0.652277	0.0822164	0.622019	0.0791608	0.625313	0.0793629	0.622019	0.0793031			0.599911	0.0776433	0.58962	0.0781427	0.615353	0.079874	0.618037	0.0807965	0.615873	0.0810902	0.613166	0.0811221	0.6174	0.0813968	0.6191	0.0813319	0.612512	0.0794868
				0.588816	0.0755307	0.604545	0.0771983	0.620429	0.0788684	0.63647	0.0805411	0.652671	0.0822164	0.625313	0.0795058	0.628614	0.0797073	0.625313	0.0796487			0.597913	0.077409	0.587414	0.0779118	0.613364	0.0796895	0.615153	0.0805263	0.612098	0.0808812	0.609661	0.0808226	0.614165	0.0812028	0.616442	0.0811317	0.611454	0.0793065
				0.58915	0.075539	0.604889	0.0772067	0.620784	0.078877	0.636837	0.0805499	0.653048	0.0822254	0.628614	0.0798508	0.631922	0.0800518	0.628614	0.0799944			0.596187	0.0771745	0.585507	0.0776774	0.611646	0.0795005	0.61266	0.0802498	0.608834	0.0806598	0.606631	0.0805137	0.611367	0.080998	0.614143	0.0809233	0.610809	0.0791336
				0.589443	0.0755548	0.605192	0.0772229	0.621096	0.0788935	0.637158	0.0805668	0.653379	0.0822427	0.631922	0.080196	0.635236	0.0803964	0.631922	0.0803402			0.594767	0.0769445	0.583937	0.0774441	0.61023	0.0793106	0.610607	0.0799723	0.606144	0.0804303	0.604135	0.0802014	0.609062	0.0807865	0.61225	0.0807108	0.610597	0.0789728
				0.589672	0.0755769	0.605427	0.0772455	0.621338	0.0789166	0.637408	0.0805904	0.653636	0.0822668	0.635236	0.0805413	0.638558	0.0807411	0.635236	0.0806861			0.593679	0.0767233	0.582734	0.0772164	0.609145	0.0791235	0.609033	0.0796992	0.60408	0.080197	0.602222	0.0798919	0.607293	0.0805723	0.610797	0.0804983	0.610821	0.0788284
				0.589816	0.0756034	0.605576	0.0772727	0.621492	0.0789445	0.637566	0.0806188	0.653799	0.0822958	0.638558	0.0808866	0.641886	0.081086	0.638558	0.0810321			0.592945	0.0765153	0.581922	0.0769986	0.608412	0.078943	0.60797	0.0794359	0.602683	0.0799645	0.600928	0.079591	0.606096	0.0803596	0.609815	0.0802898	0.611477	0.0787043
				0.589866	0.0756324	0.605627	0.0773023	0.621545	0.0789747	0.637621	0.0806498	0.653855	0.0823274	0.641886	0.0812321	0.64522	0.0814309	0.641886	0.0813782			0.59258	0.0763246	0.581516	0.0767952	0.608045	0.0787724	0.607438	0.0791875	0.601979	0.0797375	0.60028	0.0793048	0.605493	0.0801525	0.609322	0.0800896	0.612545	0.0786041
				ConcTikEll	ConcTikEll	ConcTikEll	ConcTikEll	ConcTikEll	ConcTikEll	ConcTikEll	ConcTikEll	ConcTikEll	ConcTikEll	0.64522	0.0815777	0.648562	0.081776	0.64522	0.0817245			0.59259	0.0761548	0.581525	0.0766099	0.608051	0.0786151	0.607447	0.0789589	0.601983	0.0795202	0.600289	0.0790386	0.605497	0.0799552	0.609327	0.0799015	0.613998	0.0785304
														0.648562	0.0819234	0.65191	0.0821212	0.648562	0.0820708			0.592975	0.0760093	0.581948	0.0764465	0.608431	0.0784743	0.607998	0.0787543	0.602694	0.0793169	0.600955	0.0787979	0.606107	0.0797713	0.609831	0.079729	0.615796	0.0784851
														0.65191	0.0822692	0.655265	0.0824665	0.65191	0.0824173			0.593729	0.0758909	0.582778	0.076308	0.609176	0.0783525	0.609079	0.078578	0.604098	0.0791316	0.602267	0.0785871	0.607312	0.0796046	0.610823	0.0795757	0.617889	0.0784697
														0.655265	0.0826152	0.658627	0.0828119	0.655265	0.0827639			0.594835	0.0758019	0.583997	0.0761973	0.610272	0.0782522	0.610669	0.0784332	0.606169	0.0789679	0.604197	0.0784105	0.609087	0.0794582	0.612285	0.0794445	0.62022	0.0784844
														0.658627	0.0829612	0.661996	0.0831574	0.658627	0.0831106			0.596273	0.075744	0.585582	0.0761164	0.611698	0.0781754	0.612738	0.0783228	0.608865	0.0788289	0.606708	0.0782714	0.611399	0.0793349	0.614188	0.0793379	0.622726	0.0785288
														0.661996	0.0833074	0.665371	0.083503	0.661996	0.0834574			0.598015	0.0757183	0.587503	0.076067	0.613427	0.0781235	0.615245	0.078249	0.612135	0.0787174	0.609752	0.0781726	0.614202	0.0792373	0.616494	0.0792581	0.625339	0.0786019
														0.665371	0.0836536	0.668754	0.0838487	0.665371	0.0838043			0.600027	0.0757254	0.589721	0.0760499	0.615424	0.0780975	0.618142	0.0782131	0.615914	0.0786356	0.61327	0.078116	0.617442	0.0791672	0.61916	0.0792065	0.627987	0.0787015
														0.668754	0.084	0.670236	0.084	0.667279	0.084			0.602269	0.0757651	0.592195	0.0760656	0.61765	0.078098	0.621372	0.078216	0.620129	0.078585	0.617192	0.0781026	0.621056	0.0791259	0.622132	0.0791841	0.630597	0.0788249
														0.668754	0.084	ConcBand	ConcBand	ConcBand	ConcBand			0.604698	0.0758367	0.594875	0.0761136	0.620063	0.078125	0.624872	0.0782574	0.624699	0.0785666	0.621442	0.0781329	0.624974	0.0791143	0.625354	0.0791915	0.6331	0.0789688
														IsoLine	IsoLine							0.607266	0.0759387	0.597709	0.0761932	0.622615	0.0781778	0.628574	0.0783367	0.629533	0.0785807	0.625939	0.078206	0.629118	0.0791326	0.628763	0.0792284	0.635426	0.0791293
																						0.609925	0.0760691	0.600643	0.0763027	0.625257	0.0782556	0.632406	0.0784523	0.634539	0.0786272	0.630593	0.0783208	0.633409	0.0791804	0.632291	0.0792942	0.637511	0.079302
																						0.612621	0.0762255	0.603618	0.07644	0.627936	0.0783567	0.636293	0.0786019	0.639618	0.0787051	0.635315	0.0784748	0.637763	0.0792568	0.635872	0.0793875	0.6393	0.0794821
																						0.615303	0.0764048	0.606578	0.0766024	0.630602	0.0784792	0.64016	0.0787826	0.644672	0.0788128	0.640013	0.0786651	0.642096	0.0793603	0.639433	0.0795066	0.640744	0.0796648
																						0.617917	0.0766034	0.609465	0.0767868	0.633203	0.0786207	0.643932	0.0789909	0.649603	0.0789483	0.644595	0.0788881	0.646322	0.0794889	0.642908	0.0796491	0.641802	0.0798451
																						0.620415	0.0768176	0.612222	0.0769895	0.635686	0.0787785	0.647535	0.0792228	0.654314	0.079109	0.648973	0.0791393	0.65036	0.0796401	0.646227	0.0798123	0.642447	0.080018
																						0.622746	0.0770432	0.614796	0.0772067	0.638005	0.0789495	0.650899	0.0794737	0.658713	0.0792917	0.65306	0.0794139	0.654131	0.079811	0.649327	0.079993	0.642659	0.0801788
																						0.624865	0.0772757	0.617137	0.0774341	0.640114	0.0791304	0.653958	0.0797387	0.662716	0.0794928	0.656777	0.0797065	0.657561	0.0799982	0.652146	0.0801876
																						0.626732	0.0775106	0.619199	0.0776673	0.641973	0.0793176	0.656653	0.0800127	0.666244	0.0797085	0.660053	0.0800114	0.660585	0.0801981	0.654631	0.0803924
																						0.628309	0.0777434	0.620941	0.0779017	0.643544	0.0795076	0.658932	0.0802904	0.669228	0.0799346	0.662822	0.0803227	0.663143	0.0804067	0.656732	0.0806033
																						0.629566	0.0779696	0.622331	0.0781328	0.644797	0.0796965	0.66075	0.0805663	0.671611	0.0801666	0.665032	0.0806344	0.665185	0.0806201	0.658409	0.0808164
																						0.630479	0.0781847	0.623341	0.0783561	0.645708	0.0798807	0.662071	0.0808352	0.673345	0.0804	0.66664	0.0809404	0.666671	0.0808341	0.65963	0.0810274
																						0.63103	0.0783845	0.623952	0.0785672	0.646259	0.0800567	0.662871	0.0810916	0.674399	0.0806303	0.667613	0.0812346	0.667573	0.0810445	0.660369	0.0812322
																						0.631208	0.0785652	0.62415	0.0787621	0.64644	0.0802211	0.663133	0.0813308	0.674749	0.080853	0.667933	0.0815115	0.667873	0.0812472	0.660614	0.0814269
																						Black	Black	Black	Black	Black	Black	Black	Black	Black	Black	Black	Black	Black	Black	Black	Black

## Sheet: PlotDat12
Source sheet	all data	0.627221	0.0794565	0.613567	0.0781382	0.621545	0.0789747	0.629563	0.0798119	0.637621	0.0806498	0.645718	0.0814883	0.653855	0.0823274	0.606236	0.0775	0.607556	0.0775	0.604921	0.0775	0.604365	0.0773023	0.64644	0.0802211	0.663133	0.0813308	0.674749	0.080853	0.667933	0.0815115	0.667873	0.0812472	0.660614	0.0814269	0.647129	0.0806318
Plot name	Concordia7	0.635254	0.0802006	0.613515	0.0781681	0.621492	0.079005	0.629509	0.0798425	0.637566	0.0806807	0.645663	0.0815195	0.653799	0.082359	0.606236	0.0775	0.608027	0.0775497	0.606236	0.0776392	0.612285	0.0781382	0.646247	0.0803705	0.663008	0.0814772	0.674592	0.0809941	0.667783	0.0816825	0.667738	0.0813752	0.660501	0.0815483	0.646995	0.080729
Plot Type	1	0.638321	0.0802402	0.613363	0.0781956	0.621338	0.0790328	0.629353	0.0798706	0.637408	0.0807091	0.645502	0.0815483	0.653636	0.0823881	0.608027	0.0776892	0.60982	0.0777385	0.608027	0.0778287	0.620244	0.0789747	0.645683	0.0805021	0.662646	0.0816127	0.674124	0.0811288	0.667345	0.081842	0.667337	0.081497	0.66017	0.0816625	0.6466	0.0808165
1st free col	39	0.634068	0.0803402	0.613124	0.0782184	0.621096	0.0790559	0.629107	0.079894	0.637158	0.0807327	0.645248	0.0815721	0.653379	0.0824122	0.60982	0.0778784	0.611616	0.0779274	0.60982	0.0780183	0.628242	0.0798119	0.64476	0.0806134	0.662051	0.0817362	0.673352	0.0812558	0.666623	0.0819888	0.666674	0.0816115	0.659623	0.0817686	0.645954	0.0808923
Sigma Level	2	0.636646	0.0806498	0.612817	0.0782348	0.620784	0.0790724	0.628791	0.0799107	0.636837	0.0807496	0.644922	0.0815892	0.653048	0.0824294	0.611616	0.0780677	0.613413	0.0781164	0.611616	0.0782079	0.636279	0.0806498	0.643496	0.0807022	0.661226	0.0818466	0.67228	0.0813742	0.665623	0.0821214	0.665755	0.0817179	0.658866	0.0818657	0.645067	0.0809552
Absolute Errs	FALSE	0.634938	0.0807103	0.612467	0.0782433	0.620429	0.079081	0.62843	0.0799194	0.63647	0.0807584	0.64455	0.0815981	0.652671	0.0824384	0.613413	0.078257	0.615212	0.0783053	0.613413	0.0783975	0.644357	0.0814883	0.641915	0.0807667	0.660181	0.0819429	0.670919	0.081483	0.664354	0.0822389	0.664588	0.0818152	0.657905	0.0819529	0.643958	0.0810038
Symbol Type	1	IsoLine	IsoLine	0.612102	0.0782433	0.620058	0.079081	0.628054	0.0799194	0.636089	0.0807584	0.644163	0.0815981	0.652277	0.0824384	0.615212	0.0784463	0.617014	0.0784943	0.615212	0.0785872	0.652474	0.0823274	0.640048	0.0808057	0.658922	0.0820244	0.669279	0.0815811	0.662826	0.0823402	0.663182	0.0819025	0.656748	0.0820295	0.642648	0.0810372
Inverse Plot	FALSE			0.611752	0.0782348	0.619703	0.0790724	0.627693	0.0799107	0.635722	0.0807496	0.643791	0.0815892	0.6519	0.0824294	0.617014	0.0786356	0.618817	0.0786834	0.617014	0.0787769	IsoLine	IsoLine	0.637931	0.0808185	0.657462	0.0820903	0.667376	0.0816678	0.661053	0.0824244	0.66155	0.0819791	0.655405	0.0820949	0.641162	0.0810547
Color Plot	FALSE			0.611445	0.0782184	0.619391	0.0790559	0.627377	0.079894	0.635401	0.0807327	0.643465	0.0815721	0.651569	0.0824122	0.618817	0.078825	0.620622	0.0788724	0.618817	0.0789667			0.635606	0.0808048	0.655812	0.0821401	0.665224	0.0817423	0.65905	0.0824908	0.659705	0.0820444	0.653887	0.0821484	0.63953	0.0810561
3D plot	FALSE			0.611206	0.0781956	0.619149	0.0790328	0.62713	0.0798706	0.635151	0.0807091	0.643212	0.0815483	0.651312	0.0823881	0.620622	0.0790144	0.62243	0.0790616	0.620622	0.0791564			0.633117	0.0807648	0.653987	0.0821733	0.662843	0.081804	0.656834	0.0825389	0.657664	0.0820977	0.652208	0.0821897	0.637784	0.0810412
Linear	FALSE			0.611055	0.0781681	0.618995	0.079005	0.626974	0.0798425	0.634993	0.0806807	0.643051	0.0815195	0.651148	0.082359	0.62243	0.0792039	0.624239	0.0792507	0.62243	0.0793463			0.630514	0.0806993	0.652002	0.0821897	0.660253	0.0818524	0.654424	0.0825682	0.655443	0.0821388	0.650381	0.0822184	0.635956	0.0810105
Data Range	AC14:AG33			0.611003	0.0781382	0.618942	0.0789747	0.626921	0.0798119	0.634938	0.0806498	0.642995	0.0814883	0.651092	0.0823274	0.624239	0.0793934	0.626051	0.0794399	0.624239	0.0795361			0.627847	0.0806097	0.649874	0.0821892	0.657476	0.081887	0.65184	0.0825785	0.653062	0.0821671	0.648422	0.0822342	0.634083	0.0809644
Filled Symbols	FALSE			0.611055	0.0781082	0.618995	0.0789445	0.626974	0.0797813	0.634993	0.0806188	0.643051	0.081457	0.651148	0.0822958	0.626051	0.0795829	0.627864	0.0796291	0.626051	0.079726			0.625167	0.0804976	0.647621	0.0821717	0.654535	0.0819075	0.649104	0.0825697	0.650541	0.0821825	0.646349	0.082237	0.632202	0.0809038
ConcAge	TRUE			0.611206	0.0780807	0.619149	0.0789166	0.62713	0.0797532	0.635151	0.0805904	0.643212	0.0814283	0.651312	0.0822668	0.627864	0.0797725	0.62968	0.0798183	0.627864	0.0799159			0.622528	0.0803652	0.645263	0.0821373	0.651456	0.0819138	0.64624	0.0825419	0.647902	0.0821848	0.644178	0.0822267	0.630348	0.0808301
ConcSwap	FALSE			0.611445	0.0780579	0.619391	0.0788935	0.627377	0.0797299	0.635401	0.0805668	0.643465	0.0814044	0.651569	0.0822427	0.62968	0.0799621	0.631497	0.0800076	0.62968	0.0801058			0.61998	0.0802152	0.642819	0.0820865	0.648265	0.0819059	0.643272	0.0824953	0.645166	0.082174	0.641928	0.0822036	0.628559	0.0807445
1st Symbol-row	1			0.611752	0.0780415	0.619703	0.078877	0.627693	0.0797131	0.635722	0.0805499	0.643791	0.0813874	0.6519	0.0822254	0.631497	0.0801517	0.633317	0.0801969	0.631497	0.0802958			0.617572	0.0800504	0.640311	0.0820195	0.644989	0.0818837	0.640226	0.0824303	0.642358	0.0821502	0.639619	0.0821677	0.626868	0.0806487
				0.612102	0.078033	0.620058	0.0788684	0.628054	0.0797044	0.636089	0.0805411	0.644163	0.0813785	0.652277	0.0822164	0.633317	0.0803413	0.635138	0.0803862	0.633317	0.0804858			0.615353	0.079874	0.63776	0.081937	0.641656	0.0818475	0.637127	0.0823475	0.639501	0.0821136	0.637269	0.0821193	0.625309	0.0805447
				0.612467	0.078033	0.620429	0.0788684	0.62843	0.0797044	0.63647	0.0805411	0.64455	0.0813785	0.652671	0.0822164	0.635138	0.080531	0.636962	0.0805756	0.635138	0.0806758			0.613364	0.0796895	0.635187	0.0818398	0.638295	0.0817976	0.634002	0.0822476	0.636619	0.0820645	0.6349	0.082059	0.623912	0.0804344
				0.612817	0.0780415	0.620784	0.078877	0.628791	0.0797131	0.636837	0.0805499	0.644922	0.0813874	0.653048	0.0822254	0.636962	0.0807207	0.638787	0.080765	0.636962	0.0808659			0.611646	0.0795005	0.632615	0.0817285	0.634934	0.0817344	0.630877	0.0821314	0.633738	0.0820034	0.632531	0.0819871	0.622704	0.08032
				0.613124	0.0780579	0.621096	0.0788935	0.629107	0.0797299	0.637158	0.0805668	0.645248	0.0814044	0.653379	0.0822427	0.638787	0.0809105	0.640615	0.0809544	0.638787	0.081056			0.61023	0.0793106	0.630066	0.0816042	0.631601	0.0816585	0.62778	0.0819999	0.630882	0.0819307	0.630183	0.0819043	0.621709	0.0802037
				0.613363	0.0780807	0.621338	0.0789166	0.629353	0.0797532	0.637408	0.0805904	0.645502	0.0814283	0.653636	0.0822668	0.640615	0.0811003	0.642445	0.0811439	0.640615	0.0812462			0.609145	0.0791235	0.62756	0.0814679	0.628326	0.0815705	0.624736	0.0818542	0.628075	0.081847	0.627875	0.0818114	0.620946	0.0800878
				0.613515	0.0781082	0.621492	0.0789445	0.629509	0.0797813	0.637566	0.0806188	0.645663	0.081457	0.653799	0.0822958	0.642445	0.0812901	0.644276	0.0813334	0.642445	0.0814363			0.608412	0.078943	0.625121	0.0813208	0.625137	0.0814711	0.621772	0.0816957	0.625341	0.0817532	0.625628	0.081709	0.62043	0.0799745
				0.613567	0.0781382	0.621545	0.0789747	0.629563	0.0798119	0.637621	0.0806498	0.645718	0.0814883	0.653855	0.0823274	0.644276	0.08148	0.64611	0.0815229	0.644276	0.0816266			0.608045	0.0787724	0.622768	0.0811642	0.62206	0.0813612	0.618913	0.0815255	0.622703	0.0816499	0.623459	0.0815982	0.620171	0.0798661
				ConcTikEll	ConcTikEll	ConcTikEll	ConcTikEll	ConcTikEll	ConcTikEll	ConcTikEll	ConcTikEll	ConcTikEll	ConcTikEll	ConcTikEll	ConcTikEll	0.64611	0.0816698	0.647946	0.0817125	0.64611	0.0818168			0.608051	0.0786151	0.620521	0.0809993	0.619121	0.0812417	0.616183	0.0813453	0.620184	0.0815381	0.621389	0.0814797	0.620174	0.0797646
																0.647946	0.0818598	0.649784	0.0819021	0.647946	0.0820071			0.608431	0.0784743	0.6184	0.0808276	0.616347	0.0811137	0.613606	0.0811564	0.617806	0.0814188	0.619435	0.0813547	0.620439	0.079672
																0.649784	0.0820497	0.651624	0.0820917	0.649784	0.0821974			0.609176	0.0783525	0.616423	0.0806506	0.61376	0.0809783	0.611204	0.0809607	0.615589	0.0812928	0.617612	0.0812242	0.620961	0.0795902
																0.651624	0.0822397	0.653466	0.0822814	0.651624	0.0823877			0.610272	0.0782522	0.614606	0.0804697	0.611382	0.0808365	0.608996	0.0807596	0.613551	0.0811614	0.615938	0.0810894	0.621729	0.0795207
																0.653466	0.0824297	0.65531	0.0824711	0.653466	0.0825781			0.611698	0.0781754	0.612966	0.0802865	0.609234	0.0806897	0.607002	0.0805549	0.61171	0.0810256	0.614425	0.0809512	0.62273	0.0794648
																0.65531	0.0826198	0.657156	0.0826608	0.65531	0.0827685			0.613427	0.0781235	0.611516	0.0801026	0.607335	0.080539	0.60524	0.0803484	0.610082	0.0808866	0.613088	0.0808111	0.623942	0.0794237
																0.657156	0.0828099	0.659004	0.0828506	0.657156	0.082959			0.615424	0.0780975	0.610268	0.0799196	0.6057	0.0803858	0.603723	0.0801419	0.608681	0.0807456	0.611937	0.08067	0.625343	0.0793982
																0.659004	0.083	0.660461	0.083	0.657554	0.083			0.61765	0.078098	0.609233	0.0797389	0.604343	0.0802313	0.602465	0.079937	0.607518	0.0806038	0.610982	0.0805293	0.626906	0.0793887
																0.659004	0.083	ConcBand	ConcBand	ConcBand	ConcBand			0.620063	0.078125	0.608421	0.0795622	0.603276	0.080077	0.601476	0.0797355	0.606604	0.0804624	0.610232	0.0803902	0.628599	0.0793954
																IsoLine	IsoLine							0.622615	0.0781778	0.607837	0.0793909	0.602508	0.079924	0.600766	0.0795393	0.605946	0.0803225	0.609692	0.0802538	0.630391	0.0794183
																								0.625257	0.0782556	0.607488	0.0792265	0.602045	0.0797737	0.60034	0.0793498	0.60555	0.0801855	0.609368	0.0801213	0.632246	0.0794568
																								0.627936	0.0783567	0.607375	0.0790705	0.601892	0.0796273	0.600202	0.0791688	0.605419	0.0800524	0.609262	0.0799938	0.634127	0.0795103
																								0.630602	0.0784792	0.6075	0.078924	0.60205	0.0794863	0.600352	0.0789978	0.605555	0.0799244	0.609375	0.0798724	0.635999	0.0795776
																								0.633203	0.0786207	0.607862	0.0787885	0.602517	0.0793516	0.60079	0.0788383	0.605956	0.0798026	0.609706	0.0797582	0.637825	0.0796575
																								0.635686	0.0787785	0.608457	0.078665	0.60329	0.0792245	0.601513	0.0786916	0.606619	0.079688	0.610252	0.0796521	0.63957	0.0797484
																								0.638005	0.0789495	0.609281	0.0785546	0.604362	0.0791061	0.602512	0.0785589	0.607538	0.0795817	0.611009	0.079555	0.641199	0.0798485
																								0.640114	0.0791304	0.610327	0.0784583	0.605723	0.0789974	0.603781	0.0784414	0.608705	0.0794844	0.61197	0.0794678	0.642681	0.0799559
																								0.641973	0.0793176	0.611586	0.0783768	0.607362	0.0788992	0.605309	0.0783402	0.610111	0.0793971	0.613128	0.0793912	0.643986	0.0800685
																								0.643544	0.0795076	0.613046	0.0783109	0.609266	0.0788126	0.607082	0.078256	0.611743	0.0793205	0.614471	0.0793258	0.64509	0.0801842
																								0.644797	0.0796965	0.614696	0.0782611	0.611417	0.078738	0.609085	0.0781895	0.613587	0.0792552	0.615988	0.0792722	0.645972	0.0803005
																								0.645708	0.0798807	0.616521	0.0782279	0.613798	0.0786763	0.611301	0.0781415	0.615629	0.0792018	0.617668	0.079231	0.646613	0.0804154
																								0.646259	0.0800567	0.618506	0.0782115	0.616389	0.078628	0.613711	0.0781121	0.617849	0.0791608	0.619495	0.0792023	0.647001	0.0805265
																								0.64644	0.0802211	0.620634	0.078212	0.619166	0.0785934	0.616296	0.0781018	0.62023	0.0791325	0.621453	0.0791865	0.647129	0.0806318
																								Black	Black	0.622887	0.0782295	0.622107	0.0785728	0.619031	0.0781106	0.622751	0.0791171	0.623527	0.0791837
																										0.625245	0.0782639	0.625186	0.0785665	0.621895	0.0781384	0.625391	0.0791148	0.625698	0.0791939
																										0.627688	0.0783147	0.628377	0.0785745	0.624863	0.078185	0.628127	0.0791256	0.627947	0.0792171
																										0.630196	0.0783817	0.631653	0.0785966	0.62791	0.07825	0.630935	0.0791494	0.630257	0.079253
																										0.632748	0.0784642	0.634986	0.0786328	0.631009	0.0783328	0.633792	0.079186	0.632606	0.0793013
																										0.63532	0.0785614	0.638347	0.0786827	0.634134	0.0784328	0.636673	0.0792351	0.634975	0.0793617
																										0.637892	0.0786727	0.641708	0.0787459	0.637258	0.078549	0.639555	0.0792962	0.637344	0.0794336
																										0.640442	0.078797	0.64504	0.0788219	0.640355	0.0786805	0.642411	0.0793689	0.639693	0.0795163
																										0.642947	0.0789333	0.648315	0.0789099	0.643399	0.0788261	0.645218	0.0794526	0.642001	0.0796093
																										0.645387	0.0790804	0.651505	0.0790093	0.646363	0.0789847	0.647952	0.0795464	0.644248	0.0797116
																										0.64774	0.079237	0.654582	0.0791192	0.649222	0.0791548	0.65059	0.0796497	0.646416	0.0798225
																										0.649987	0.0794019	0.65752	0.0792386	0.651952	0.0793351	0.653108	0.0797615	0.648486	0.0799409
																										0.652108	0.0795736	0.660295	0.0793666	0.654529	0.0795239	0.655486	0.0798808	0.650441	0.0800659
																										0.654085	0.0797506	0.662882	0.0795021	0.656932	0.0797197	0.657704	0.0800068	0.652263	0.0801964
																										0.655902	0.0799315	0.66526	0.0796438	0.659139	0.0799208	0.659742	0.0801382	0.653938	0.0803313
																										0.657542	0.0801147	0.667407	0.0797907	0.661133	0.0801254	0.661582	0.080274	0.65545	0.0804694
																										0.658992	0.0802986	0.669307	0.0799413	0.662896	0.0803319	0.66321	0.0804129	0.656788	0.0806096
																										0.66024	0.0804816	0.670942	0.0800946	0.664413	0.0805385	0.664612	0.080554	0.657939	0.0807506
																										0.661274	0.0806623	0.672299	0.080249	0.66567	0.0807434	0.665775	0.0806958	0.658894	0.0808913
																										0.662087	0.080839	0.673366	0.0804034	0.666659	0.0809448	0.666689	0.0808372	0.659644	0.0810305
																										0.662671	0.0810103	0.674134	0.0805564	0.667369	0.0811411	0.667347	0.0809771	0.660184	0.0811669
																										0.66302	0.0811747	0.674596	0.0807067	0.667795	0.0813305	0.667743	0.0811141	0.660508	0.0812994
																										0.663133	0.0813308	0.674749	0.080853	0.667933	0.0815115	0.667873	0.0812472	0.660614	0.0814269
																										Black	Black	Black	Black	Black	Black	Black	Black	Black	Black

[truncated: 2 more sheets: PlotDat6, data table]
