# Supplementary material for: A tectonic carpet of Variscan flysch at the base of a rootless accretionary prism in northwestern Iberia: U–Pb zircon age constrains from sediments and volcanic olistoliths
Source: Copernicus journal article supplement (doi:10.5194/se-12-835-2021), 2021-04-15
Supplement: Supplementary file 4 [file se-12-835-2021-supplement.zip]

## Cluster 2 - Multiple Gondwana-derived sources

- Group 1 - "Upper allochthon M-HT+LT1"
- Group 2 - undefined sources
- Group 3 - undefined sources
- Group 4 - Cambrian UPa and LA1
- Group 5 - "Gondwana type": E Ord UPa+CIZ+OMZ+LA2
- Group 6 - "Cambrian WALZ+CZ?"
- Group 7 - "Upper allochthon LT2 + Mix with Gondwana type"

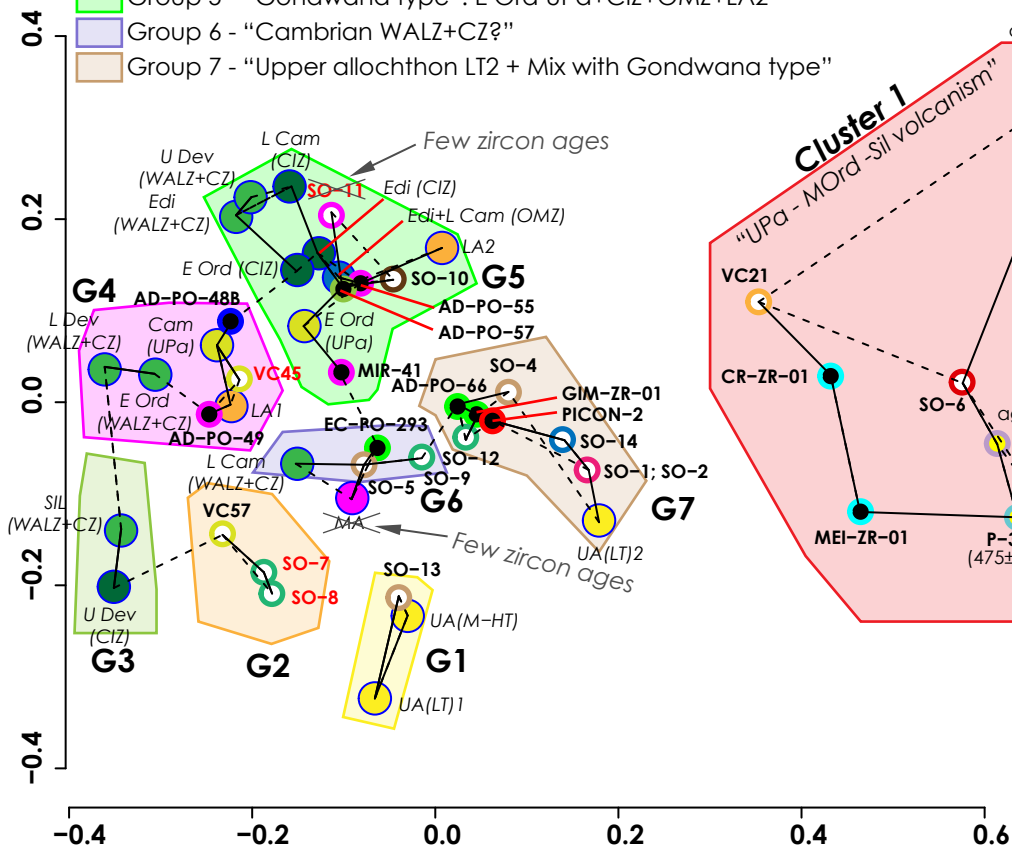

## This study

### Detrital Rocks

- Meirinhos Fm.
- Gimonde Fm.
- Curros Fm.
- Upper Schists Fm.
- Culminating Slate and Greywacke Fm.
- Rio Baio Thrust Sheet (Cabo Ortegal)

### Volcanic rocks

- Peso Fm.
- Olistoliths in the LPa

## Previous studies (detrital rocks)

- Travanca Fm.
- Vila Chã Fm.
- Rábano Fm.
- San Vitero Fm.
- San Clodio Fm.
- Gimonde Fm.
- Rio de Onor Fm.
- Almendra Fm.
- Armorican Quartzite olistolith in Rábano Fm.

## Source A

- Upper Parautochthon
- Central Iberian Zone
- WALZ+CZ
- OMZ

## Source B

- Upper allochthon
- Middle allochthon
- Lower allochthon

Olistoliths are labeled in red
