# Supplementary material for: A tectonic carpet of Variscan flysch at the base of a rootless accretionary prism in northwestern Iberia: U–Pb zircon age constrains from sediments and volcanic olistoliths
Source: Copernicus journal article supplement (doi:10.5194/se-12-835-2021), 2021-04-15
Supplement: Supplementary file 4 [file Supplementary Table 13_P383.xls]

## Sheet: PlotDat1
Source sheet	all data	0.2	1.21828	1	1.11973	0.000363325	0.85	1.11937
Plot name	Average0	64.8	1.21828	2	1.13962	0.000971371	1.15	1.11937
Plot Type	15			3	1.14697	0.00120186	1.15	1.1201
1st free col	8			4	1.16662	0.00141026	0.85	1.1201
Sigma Level	2			5	1.17082	0.000364088	0.85	1.11937
Absolute Errs	FALSE			6	1.17552	0.00126885	ErrBox	ErrBox
Symbol Type	1			7	1.17791	0.00168644	1.85	1.13865
Inverse Plot	FALSE			8	1.18307	0.000877553	2.15	1.13865
Color Plot	TRUE			9	1.19377	0.00126688	2.15	1.14059
3D plot	FALSE			10	1.19503	0.000741735	1.85	1.14059
Linear	FALSE			11	1.19932	0.000968121	1.85	1.13865
Data Range	K13:L76			12	1.20011	0.000847188	ErrBox	ErrBox
Filled Symbols	TRUE			13	1.20048	0.000525388	2.85	1.14577
ConcAge	FALSE			14	1.20316	0.000334064	3.15	1.14577
ConcSwap	FALSE			15	1.20331	0.00133786	3.15	1.14818
1st Symbol-row	1			16	1.20451	0.00148838	2.85	1.14818
				17	1.20472	0.000985953	2.85	1.14577
				18	1.20799	0.000636908	ErrBox	ErrBox
				19	1.21129	0.000494955	3.85	1.16521
				20	1.21434	0.000925416	4.15	1.16521
				21	1.21456	0.00085116	4.15	1.16803
				22	1.21468	0.000758604	3.85	1.16803
				23	1.21687	0.000857058	3.85	1.16521
				24	1.21818	0.000690172	ErrBox	ErrBox
				25	1.22051	0.00188496	4.85	1.17045
				26	1.22136	0.00054137	5.15	1.17045
				27	1.22189	0.0015842	5.15	1.17118
				28	1.22242	0.000722994	4.85	1.17118
				29	1.22445	0.00140272	4.85	1.17045
				30	1.22547	0.000912886	ErrBox	ErrBox
				31	1.22602	0.000958307	5.85	1.17425
				32	1.22625	0.00173567	6.15	1.17425
				33	1.23033	0.00372194	6.15	1.17679
				34	1.23266	0.000842854	5.85	1.17679
				35	1.23397	0.00117361	5.85	1.17425
				36	1.23672	0.00100021	ErrBox	ErrBox
				37	1.23989	0.000737863	6.85	1.17623
				38	1.2441	0.000875222	7.15	1.17623
				39	1.24684	0.00123381	7.15	1.1796
				40	1.24954	0.00211764	6.85	1.1796
				41	1.24964	0.00049031	6.85	1.17623
				42	1.2497	0.0035913	ErrBox	ErrBox
				43	1.25281	0.00147444	7.85	1.1822
				44	1.25353	0.00074281	8.15	1.1822
				45	1.25645	0.00105156	8.15	1.18395
				46	1.25893	0.0005168	7.85	1.18395
				47	1.26019	0.00117987	7.85	1.1822
				48	1.26154	0.00140378	ErrBox	ErrBox
				49	1.26355	0.00185566	8.85	1.19251
				50	1.26535	0.00141729	9.15	1.19251
				51	1.26701	0.000611497	9.15	1.19504
				52	1.26913	0.000883116	8.85	1.19504
				53	1.27371	0.000824175	8.85	1.19251
				54	1.27372	0.00159732	ErrBox	ErrBox
				55	1.27563	0.000895938	9.85	1.19429
				56	1.28041	0.00113362	10.15	1.19429
				57	1.2831	0.000782113	10.15	1.19577
				58	1.31072	0.00333599	9.85	1.19577
				59	1.32874	0.00102994	9.85	1.19429
				60	1.35531	0.000737749	ErrBox	ErrBox
				61	1.35747	0.00122827	10.85	1.19835
				62	1.36653	0.00142866	11.15	1.19835
				63	1.37259	0.00570703	11.15	1.20029
				64	1.37413	0.00341867	10.85	1.20029
				IsoLine	IsoLine	IsoLine	10.85	1.19835
							ErrBox	ErrBox
							11.85	1.19926
							12.15	1.19926
							12.15	1.20096
							11.85	1.20096
							11.85	1.19926
							ErrBox	ErrBox
							12.85	1.19995
							13.15	1.19995
							13.15	1.201
							12.85	1.201
							12.85	1.19995
							ErrBox	ErrBox
							13.85	1.20282
							14.15	1.20282
							14.15	1.20349
							13.85	1.20349
							13.85	1.20282
							ErrBox	ErrBox
							14.85	1.20197
							15.15	1.20197
							15.15	1.20465
							14.85	1.20465
							14.85	1.20197
							ErrBox	ErrBox
							15.85	1.20303
							16.15	1.20303
							16.15	1.206
							15.85	1.206
							15.85	1.20303
							ErrBox	ErrBox
							16.85	1.20373
							17.15	1.20373
							17.15	1.2057
							16.85	1.2057
							16.85	1.20373
							ErrBox	ErrBox
							17.85	1.20735
							18.15	1.20735
							18.15	1.20863
							17.85	1.20863
							17.85	1.20735
							ErrBox	ErrBox
							18.85	1.21079
							19.15	1.21079
							19.15	1.21178
							18.85	1.21178
							18.85	1.21079
							ErrBox	ErrBox
							19.85	1.21342
							20.15	1.21342
							20.15	1.21527
							19.85	1.21527
							19.85	1.21342
							ErrBox	ErrBox
							20.85	1.21371
							21.15	1.21371
							21.15	1.21542
							20.85	1.21542
							20.85	1.21371
							ErrBox	ErrBox
							21.85	1.21392
							22.15	1.21392
							22.15	1.21544
							21.85	1.21544
							21.85	1.21392
							ErrBox	ErrBox
							22.85	1.21602
							23.15	1.21602
							23.15	1.21773
							22.85	1.21773
							22.85	1.21602
							ErrBox	ErrBox
							23.85	1.21749
							24.15	1.21749
							24.15	1.21887
							23.85	1.21887
							23.85	1.21749
							ErrBox	ErrBox
							24.85	1.21863
							25.15	1.21863
							25.15	1.2224
							24.85	1.2224
							24.85	1.21863
							ErrBox	ErrBox
							25.85	1.22082
							26.15	1.22082
							26.15	1.2219
							25.85	1.2219
							25.85	1.22082
							ErrBox	ErrBox
							26.85	1.2203
							27.15	1.2203
							27.15	1.22347
							26.85	1.22347
							26.85	1.2203
							ErrBox	ErrBox
							27.85	1.2217
							28.15	1.2217
							28.15	1.22314
							27.85	1.22314
							27.85	1.2217
							ErrBox	ErrBox
							28.85	1.22304
							29.15	1.22304
							29.15	1.22585
							28.85	1.22585
							28.85	1.22304
							ErrBox	ErrBox
							29.85	1.22456
							30.15	1.22456
							30.15	1.22638
							29.85	1.22638
							29.85	1.22456
							ErrBox	ErrBox
							30.85	1.22506
							31.15	1.22506
							31.15	1.22698
							30.85	1.22698
							30.85	1.22506
							ErrBox	ErrBox
							31.85	1.22452
							32.15	1.22452
							32.15	1.22799
							31.85	1.22799
							31.85	1.22452
							ErrBox	ErrBox
							32.85	1.22661
							33.15	1.22661
							33.15	1.23406
							32.85	1.23406
							32.85	1.22661
							ErrBox	ErrBox
							33.85	1.23182
							34.15	1.23182
							34.15	1.23351
							33.85	1.23351
							33.85	1.23182
							ErrBox	ErrBox
							34.85	1.2328
							35.15	1.2328
							35.15	1.23514
							34.85	1.23514
							34.85	1.2328
							ErrBox	ErrBox
							35.85	1.23572
							36.15	1.23572
							36.15	1.23772
							35.85	1.23772
							35.85	1.23572
							ErrBox	ErrBox
							36.85	1.23916
							37.15	1.23916
							37.15	1.24063
							36.85	1.24063
							36.85	1.23916
							ErrBox	ErrBox
							37.85	1.24322
							38.15	1.24322
							38.15	1.24497
							37.85	1.24497
							37.85	1.24322
							ErrBox	ErrBox
							38.85	1.2456
							39.15	1.2456
							39.15	1.24807
							38.85	1.24807
							38.85	1.2456
							ErrBox	ErrBox
							39.85	1.24742
							40.15	1.24742
							40.15	1.25166
							39.85	1.25166
							39.85	1.24742
							ErrBox	ErrBox
							40.85	1.24915
							41.15	1.24915
							41.15	1.25013
							40.85	1.25013
							40.85	1.24915
							ErrBox	ErrBox
							41.85	1.24611
							42.15	1.24611
							42.15	1.25329
							41.85	1.25329
							41.85	1.24611
							ErrBox	ErrBox
							42.85	1.25133
							43.15	1.25133
							43.15	1.25428
							42.85	1.25428
							42.85	1.25133
							ErrBox	ErrBox
							43.85	1.25279
							44.15	1.25279
							44.15	1.25428
							43.85	1.25428
							43.85	1.25279
							ErrBox	ErrBox
							44.85	1.2554
							45.15	1.2554
							45.15	1.25751
							44.85	1.25751
							44.85	1.2554
							ErrBox	ErrBox
							45.85	1.25842
							46.15	1.25842
							46.15	1.25945
							45.85	1.25945
							45.85	1.25842
							ErrBox	ErrBox
							46.85	1.25901
							47.15	1.25901
							47.15	1.26137
							46.85	1.26137
							46.85	1.25901
							ErrBox	ErrBox
							47.85	1.26014
							48.15	1.26014
							48.15	1.26295
							47.85	1.26295
							47.85	1.26014
							ErrBox	ErrBox
							48.85	1.26169
							49.15	1.26169
							49.15	1.2654
							48.85	1.2654
							48.85	1.26169
							ErrBox	ErrBox
							49.85	1.26393
							50.15	1.26393
							50.15	1.26677
							49.85	1.26677
							49.85	1.26393
							ErrBox	ErrBox
							50.85	1.2664
							51.15	1.2664
							51.15	1.26762
							50.85	1.26762
							50.85	1.2664
							ErrBox	ErrBox
							51.85	1.26825
							52.15	1.26825
							52.15	1.27002
							51.85	1.27002
							51.85	1.26825
							ErrBox	ErrBox
							52.85	1.27289
							53.15	1.27289
							53.15	1.27454
							52.85	1.27454
							52.85	1.27289
							ErrBox	ErrBox
							53.85	1.27212
							54.15	1.27212
							54.15	1.27531
							53.85	1.27531
							53.85	1.27212
							ErrBox	ErrBox
							54.85	1.27473
							55.15	1.27473
							55.15	1.27653
							54.85	1.27653
							54.85	1.27473
							ErrBox	ErrBox
							55.85	1.27928
							56.15	1.27928
							56.15	1.28155
							55.85	1.28155
							55.85	1.27928
							ErrBox	ErrBox
							56.85	1.28232
							57.15	1.28232
							57.15	1.28388
							56.85	1.28388
							56.85	1.28232
							ErrBox	ErrBox
							57.85	1.30738
							58.15	1.30738
							58.15	1.31405
							57.85	1.31405
							57.85	1.30738
							ErrBox	ErrBox
							58.85	1.32771
							59.15	1.32771
							59.15	1.32977
							58.85	1.32977
							58.85	1.32771
							ErrBox	ErrBox
							59.85	1.35457
							60.15	1.35457
							60.15	1.35604
							59.85	1.35604
							59.85	1.35457
							ErrBox	ErrBox
							60.85	1.35624
							61.15	1.35624
							61.15	1.3587
							60.85	1.3587
							60.85	1.35624
							ErrBox	ErrBox
							61.85	1.3651
							62.15	1.3651
							62.15	1.36796
							61.85	1.36796
							61.85	1.3651
							ErrBox	ErrBox
							62.85	1.36688
							63.15	1.36688
							63.15	1.37829
							62.85	1.37829
							62.85	1.36688
							ErrBox	ErrBox
							63.85	1.37071
							64.15	1.37071
							64.15	1.37755
							63.85	1.37755
							63.85	1.37071
							ErrBox	ErrBox

## Sheet: PlotDat6
Source sheet	all data	1.03881	0.0639769	0	0	0.217708	0.0315113	1.09587	0.0650239	1.11692	0.0815336	0.866021	0.0717386	1.80618	0.129878	0.468268	0.0518313	0.769913	0.0808397	0.797946	0.0815109	1.7462	0.131497	0.69477	0.0783916	0.701562	0.0799317	0.749686	0.0832767	0.558475	0.0678869	0.702734	0.0784131	0.685152	0.0785001	0.746435	0.0836108	0.641471	0.0763779	0.601148	0.0718142	0.72087	0.0831866	0.684483	0.0807248	0.672092	0.0804195	0.645025	0.0791461
Plot name	Concordia0	1.06351	0.0808597	0.106866	0.0161211	0.482812	0.0640155	1.09477	0.0653172	1.11589	0.0818153	0.864776	0.0720056	1.80504	0.130232	0.467398	0.0521556	0.769357	0.0810768	0.796923	0.0818059	1.74182	0.131884	0.694301	0.0786168	0.701047	0.0801479	0.748889	0.0836131	0.558052	0.0681097	0.701787	0.0786855	0.684413	0.078802	0.745616	0.0838726	0.641091	0.0765779	0.600556	0.0721179	0.719941	0.0835236	0.683748	0.0810266	0.671521	0.0806834	0.644719	0.0793136
Plot Type	1	0.801332	0.0713726	0.225152	0.032502	0.805631	0.097544	1.09151	0.0655589	1.11285	0.0820602	0.861093	0.0722484	1.80169	0.130472	0.464831	0.0524438	0.767723	0.0812785	0.7939	0.082072	1.72887	0.132248	0.692927	0.0788049	0.69953	0.0803359	0.746546	0.0839049	0.556834	0.0682672	0.698989	0.078933	0.682235	0.0790667	0.743195	0.0841083	0.639981	0.0767407	0.598825	0.0723716	0.717198	0.0838244	0.68158	0.0812924	0.669842	0.0809109	0.64383	0.0794471
1st free col	129	1.74765	0.127261	0.356078	0.049147	1.19873	0.132129	1.08624	0.0657399	1.10791	0.082259	0.855114	0.0724574	1.79627	0.130588	0.460666	0.0526849	0.765072	0.081437	0.788992	0.082299	1.70783	0.132575	0.690701	0.0789486	0.69707	0.0804886	0.742745	0.0841406	0.554869	0.0683534	0.694447	0.0791461	0.678702	0.0792842	0.739266	0.084309	0.638184	0.07686	0.596021	0.0725654	0.712748	0.0840776	0.678064	0.0815118	0.667119	0.0810934	0.642393	0.0795415
Sigma Level	2	0.423235	0.0512161	0.500997	0.0660604	1.67741	0.167804	1.07913	0.0658531	1.10126	0.082404	0.847068	0.0726248	1.78897	0.130576	0.455062	0.0528695	0.761509	0.0815463	0.782388	0.0824783	1.67953	0.132853	0.687708	0.0790424	0.693762	0.0806002	0.737633	0.0843114	0.552231	0.068365	0.688334	0.0793167	0.673949	0.0794461	0.733979	0.0844668	0.63577	0.0769311	0.592251	0.0726918	0.70676	0.0842734	0.673333	0.0816764	0.663458	0.0812238	0.640462	0.0795933
Absolute Errs	FALSE	0.741293	0.0801547	0.661402	0.0832464	2.2603	0.204603	1.07048	0.0658942	1.09317	0.0824897	0.837265	0.0727441	1.78009	0.130438	0.448235	0.0529906	0.757168	0.0816021	0.774342	0.0826028	1.64503	0.133071	0.684064	0.0790826	0.689732	0.0806662	0.731406	0.0844105	0.549022	0.0683015	0.680887	0.0794382	0.66816	0.0795462	0.727538	0.0845758	0.632831	0.0769513	0.587662	0.072746	0.699465	0.0844042	0.667571	0.0817799	0.658999	0.0812971	0.638111	0.0796004
Symbol Type	1	0.744859	0.0810549	0.838949	0.100709	2.97009	0.242562	1.06062	0.0658616	1.08393	0.0825128	0.82608	0.0728106	1.76996	0.130177	0.440447	0.0530434	0.752217	0.0816022	0.765162	0.0826678	1.60567	0.13322	0.679908	0.0790678	0.685135	0.0806841	0.724303	0.0844343	0.545365	0.0681653	0.672391	0.0795059	0.661557	0.0795806	0.720189	0.0846318	0.62948	0.0769199	0.582428	0.072726	0.691144	0.0844652	0.660999	0.0818183	0.653913	0.0813105	0.635432	0.0795625
Inverse Plot	FALSE	1.51856	0.131291	1.03547	0.118454	3.83441	0.281716	1.04991	0.0657566	1.07391	0.0824723	0.813945	0.0728219	1.75898	0.129804	0.431998	0.0530261	0.746846	0.0815467	0.755203	0.0826709	1.56297	0.133296	0.6754	0.0789984	0.680148	0.0806534	0.716598	0.0843818	0.541402	0.0679618	0.663173	0.0795173	0.654393	0.0795481	0.712217	0.0846325	0.625846	0.0768381	0.576752	0.0726325	0.682116	0.0844538	0.653869	0.0817901	0.648396	0.0812634	0.632527	0.0794811
Color Plot	TRUE	0.670751	0.0776495	1.25299	0.136485	4.8869	0.322105	1.03878	0.0655832	1.06349	0.0823698	0.801324	0.0727775	1.74756	0.129333	0.423212	0.0529392	0.741262	0.0814378	0.744846	0.0826118	1.51856	0.133294	0.670713	0.0788772	0.674963	0.0805751	0.708586	0.084255	0.537283	0.0676987	0.653587	0.0794718	0.646943	0.0794498	0.703926	0.084578	0.622069	0.076709	0.570851	0.072469	0.672728	0.0843705	0.646454	0.0816965	0.64266	0.0811578	0.629507	0.0793594
3D plot	FALSE	0.674986	0.0794163	1.49376	0.154806	6.16853	0.363766	1.02764	0.0653481	1.05307	0.0822093	0.788705	0.0726791	1.73614	0.128783	0.414426	0.0527861	0.735679	0.0812795	0.73449	0.082493	1.47415	0.133215	0.666028	0.0787089	0.669779	0.0804523	0.700576	0.0840588	0.533168	0.0673862	0.644001	0.0793713	0.639495	0.0792895	0.695636	0.0844704	0.618293	0.0765376	0.564952	0.072242	0.663341	0.0842186	0.639041	0.0815409	0.636925	0.0809976	0.626489	0.079202
Linear	FALSE	0.708623	0.0824489	1.76026	0.173423	7.72917	0.40674	1.01694	0.0650603	1.04305	0.081997	0.77657	0.0725305	1.72517	0.128174	0.40598	0.0525726	0.730312	0.081078	0.724532	0.0823188	1.43145	0.133063	0.661524	0.0784998	0.664795	0.0802897	0.692875	0.0838007	0.529215	0.0670362	0.634784	0.0792196	0.632334	0.0790734	0.687665	0.0843138	0.614664	0.0763304	0.559281	0.07196	0.654315	0.0840039	0.631914	0.0813295	0.631411	0.080789	0.623588	0.079015
Data Range	B3:F62	0.537373	0.0664117	2.05523	0.19234	9.62957	0.451068	1.00708	0.0647308	1.03382	0.0817409	0.765387	0.0723374	1.71505	0.12753	0.398196	0.052307	0.725367	0.080841	0.715355	0.0820961	1.3921	0.132842	0.657375	0.078258	0.660202	0.0800935	0.685779	0.0834907	0.525575	0.0666622	0.62629	0.0790225	0.625736	0.0788098	0.680319	0.0841142	0.611321	0.0760955	0.554058	0.071634	0.645998	0.0837346	0.625346	0.0810703	0.626332	0.08054	0.620917	0.0788055
Filled Symbols	TRUE	0.653597	0.078039	2.38173	0.211561	11.9437	0.496793	0.998435	0.0643724	1.02573	0.081451	0.755585	0.0721072	1.7062	0.126876	0.391375	0.0519995	0.721034	0.0805777	0.707312	0.0818334	1.3576	0.132562	0.65374	0.0779929	0.656178	0.0798712	0.679561	0.0831406	0.522388	0.0662786	0.618845	0.0787877	0.619953	0.0785089	0.673881	0.0838793	0.608393	0.0758418	0.549482	0.0712764	0.638709	0.0834211	0.619591	0.0807733	0.621881	0.0802602	0.618577	0.0785816
ConcAge	FALSE	0.646971	0.0778374	2.74312	0.231093	14.7617	0.543959	0.991343	0.0639987	1.01909	0.0811383	0.747542	0.0718488	1.69893	0.126236	0.385778	0.0516619	0.71748	0.0802981	0.700712	0.0815408	1.32929	0.132233	0.650758	0.0777146	0.652876	0.0796315	0.67446	0.082764	0.519778	0.0659001	0.612736	0.078524	0.615209	0.0781821	0.668598	0.0836181	0.605992	0.0755791	0.545729	0.070901	0.632728	0.0830754	0.614869	0.0804498	0.61823	0.0799603	0.616659	0.0783519
ConcSwap	FALSE	0.70394	0.0831953	3.14314	0.25094	IsoLine	IsoLine	0.986075	0.0636242	1.01416	0.080815	0.741565	0.0715721	1.69354	0.125637	0.381621	0.0513071	0.71484	0.080013	0.695809	0.0812295	1.30826	0.131867	0.648545	0.0774337	0.650424	0.0793835	0.670672	0.0823752	0.517843	0.0655412	0.608197	0.0782417	0.611686	0.0778421	0.664673	0.0833406	0.604211	0.0753175	0.542944	0.0705223	0.628285	0.0827109	0.611362	0.0801124	0.615518	0.0796519	0.615236	0.0781252
1st Symbol-row	1	0.622113	0.0756076	3.58589	0.271106			0.982833	0.0632633	1.01112	0.0804933	0.737886	0.0712877	1.69022	0.125099	0.379063	0.0509489	0.713217	0.0797333	0.69279	0.0809115	1.2953	0.13148	0.647185	0.0771612	0.648916	0.0791368	0.668342	0.0819893	0.516659	0.0652158	0.605403	0.0779516	0.609518	0.0775019	0.662258	0.0830576	0.603118	0.0750671	0.541233	0.0701547	0.625551	0.0823414	0.609205	0.079774	0.613852	0.0793468	0.614364	0.0779103
		0.570905	0.0708133	4.07597	0.291598			0.981742	0.0629298	1.0101	0.0801858	0.736644	0.0710066	1.68912	0.124645	0.378202	0.0506009	0.712673	0.0794698	0.691773	0.080599	1.29093	0.131085	0.646731	0.0769074	0.64841	0.0789008	0.66756	0.0816211	0.516272	0.0649364	0.604461	0.0776649	0.60879	0.0771747	0.661444	0.0827798	0.602754	0.0748374	0.540663	0.0698125	0.624631	0.0819813	0.60848	0.0794476	0.613293	0.0790568	0.614075	0.0777154
		0.67275	0.082584	4.61842	0.312419			0.982845	0.0626365	1.01113	0.0799041	0.737889	0.0707396	1.69026	0.124291	0.379072	0.0502766	0.713229	0.0792327	0.692795	0.080304	1.2953	0.130699	0.6472	0.0766821	0.648925	0.0786847	0.668356	0.0812846	0.516695	0.0647136	0.605408	0.0773926	0.609529	0.0768728	0.662263	0.0825181	0.603135	0.0746373	0.541255	0.0695087	0.62556	0.0816444	0.609215	0.0791457	0.613864	0.0787929	0.61438	0.0775479
		0.646481	0.0800862	5.21883	0.333577			0.986097	0.0623948	1.01417	0.0796592	0.741571	0.0704969	1.69361	0.124051	0.381639	0.0499884	0.714864	0.079031	0.695819	0.0800379	1.30826	0.130335	0.648574	0.076494	0.650441	0.0784966	0.6707	0.0809929	0.517912	0.0645561	0.608206	0.0771451	0.611707	0.0766081	0.664684	0.0822823	0.604245	0.0744746	0.542986	0.069255	0.628303	0.0813435	0.611383	0.07888	0.615544	0.0785654	0.615269	0.0774144
		0.642693	0.0797382	5.88341	0.355076			0.991376	0.0622138	1.01911	0.0794604	0.747551	0.0702878	1.69903	0.123935	0.385804	0.0497473	0.717514	0.0788725	0.700727	0.0798108	1.32929	0.130007	0.6508	0.0763504	0.652901	0.0783439	0.6745	0.0807571	0.519878	0.06447	0.612748	0.076932	0.61524	0.0763906	0.668613	0.0820817	0.606041	0.0743553	0.54579	0.0690613	0.632753	0.0810903	0.614899	0.0786606	0.618266	0.0783829	0.616707	0.07732
		0.62955	0.0784307	6.61901	0.376921			0.998477	0.0621006	1.02575	0.0793154	0.755597	0.0701204	1.70633	0.123946	0.391408	0.0495627	0.721078	0.0787632	0.707331	0.0796316	1.3576	0.12973	0.653793	0.0762566	0.65621	0.0782324	0.679613	0.0805864	0.522516	0.0644584	0.618861	0.0767614	0.619993	0.0762287	0.6739	0.0819238	0.608455	0.0742842	0.549559	0.0689348	0.638741	0.0808946	0.619629	0.078496	0.621927	0.0782526	0.618638	0.0772682
		0.75639	0.0908241	7.43322	0.399118			1.00713	0.0620595	1.03385	0.0792297	0.7654	0.0700012	1.71521	0.124085	0.398236	0.0494416	0.725418	0.0787074	0.715377	0.0795071	1.3921	0.129512	0.657438	0.0762164	0.66024	0.0781664	0.68584	0.0804872	0.525725	0.0645219	0.626308	0.0766399	0.625782	0.0761286	0.680341	0.0818148	0.611394	0.074264	0.554149	0.0688806	0.646035	0.0807637	0.625391	0.0783925	0.626386	0.0781793	0.620988	0.0772611
		0.639738	0.0795738	8.33445	0.421674			1.017	0.0620921	1.04309	0.0792066	0.776585	0.0699346	1.72534	0.124346	0.406023	0.0493888	0.730369	0.0787073	0.724556	0.079442	1.43145	0.129362	0.661594	0.0762312	0.664836	0.0781484	0.692942	0.0804634	0.529381	0.064658	0.634804	0.0765721	0.632386	0.0760942	0.68769	0.0817589	0.614745	0.0742954	0.559383	0.0689006	0.654357	0.0807028	0.631964	0.0783541	0.631472	0.0781659	0.623667	0.077299
		0.665545	0.0821987	9.33198	0.444593			1.0277	0.0621971	1.05311	0.0792471	0.78872	0.0699233	1.73632	0.124719	0.414473	0.0494061	0.73574	0.0787627	0.734516	0.079439	1.47416	0.129287	0.666102	0.0763005	0.669823	0.0781791	0.700647	0.0805159	0.533345	0.0648615	0.644022	0.0765608	0.63955	0.0761267	0.695662	0.0817581	0.618379	0.0743772	0.565059	0.0689941	0.663385	0.0807142	0.639094	0.0783823	0.636989	0.0782129	0.626573	0.0773803
		0.621114	0.0778186	10.4361	0.467881			1.03884	0.0623705	1.06353	0.0793496	0.80134	0.0699677	1.74774	0.12519	0.423259	0.049493	0.741324	0.0788717	0.744873	0.079498	1.51857	0.129289	0.670789	0.0764217	0.675008	0.0782574	0.708659	0.0806427	0.537463	0.0651246	0.653608	0.0766062	0.646999	0.076225	0.703953	0.0818126	0.622156	0.0745063	0.57096	0.0691576	0.672773	0.0807974	0.646509	0.0784759	0.642725	0.0783186	0.629593	0.0775021
		0.608469	0.0765414	11.6582	0.491545			1.04997	0.0626056	1.07395	0.0795101	0.81396	0.0700661	1.75916	0.12574	0.432044	0.0496461	0.746907	0.07903	0.755229	0.0796169	1.56298	0.129367	0.675474	0.0765901	0.680193	0.0783802	0.716669	0.0808389	0.541578	0.0654371	0.663194	0.0767067	0.654447	0.0763853	0.712243	0.0819202	0.625932	0.0746777	0.576859	0.0693847	0.68216	0.0809493	0.653922	0.0786314	0.64846	0.0784788	0.632611	0.0776595
		0.672385	0.0831603	13.011	0.51559			1.06067	0.0628934	1.08397	0.0797224	0.826095	0.0702147	1.77013	0.126349	0.44049	0.0498596	0.752274	0.0792315	0.765187	0.079791	1.60568	0.12952	0.679978	0.0767992	0.685177	0.0785429	0.72437	0.081097	0.545532	0.0657871	0.672411	0.0768584	0.661608	0.0766014	0.720214	0.0820769	0.629561	0.0748849	0.582529	0.0696666	0.691186	0.0811641	0.661049	0.0788428	0.653974	0.0786874	0.635511	0.0778465
		0.747709	0.0906327	14.5083	0.540023			1.07053	0.0632229	1.0932	0.0799785	0.837278	0.0704078	1.78025	0.126993	0.448274	0.0501252	0.757219	0.0794685	0.774364	0.0800137	1.64503	0.129741	0.684127	0.0770409	0.689769	0.0787391	0.731466	0.081407	0.549172	0.0661611	0.680905	0.0770555	0.668207	0.076865	0.72756	0.0822765	0.632904	0.0751198	0.587753	0.0699927	0.699503	0.0814333	0.667616	0.0791021	0.659053	0.0789364	0.638183	0.078056
		0.606478	0.0765961	16.1656	0.56485			1.07918	0.0635813	1.10129	0.0802684	0.847079	0.070638	1.7891	0.127647	0.455095	0.0504327	0.761552	0.0797318	0.782407	0.0802765	1.67953	0.130021	0.687762	0.0773061	0.693794	0.0789613	0.737684	0.0817571	0.552358	0.0665447	0.68835	0.0772904	0.673989	0.0771659	0.733998	0.0825114	0.635832	0.0753735	0.592329	0.0703502	0.706792	0.0817468	0.673372	0.0793991	0.663504	0.0792162	0.640523	0.0782799
		0.830137	0.0984533	18	0.590077			1.08627	0.063955	1.10793	0.0805811	0.855123	0.0708964	1.79637	0.128286	0.460692	0.0507703	0.765107	0.0800114	0.789007	0.0805691	1.70784	0.13035	0.690743	0.0775844	0.697095	0.079201	0.742785	0.0821337	0.554969	0.0669233	0.694459	0.0775541	0.678733	0.0774927	0.739281	0.0827726	0.638233	0.0756362	0.596082	0.0707256	0.712773	0.0820925	0.678094	0.0797225	0.667156	0.079516	0.642441	0.0785096
		0.633288	0.0793903	18	0.590077			1.09154	0.0643295	1.11286	0.0809044	0.8611	0.0711731	1.80176	0.128886	0.464849	0.051125	0.767746	0.0802965	0.79391	0.0808804	1.72887	0.130715	0.692956	0.0778652	0.699547	0.079449	0.746574	0.0825225	0.556903	0.0672821	0.698998	0.0778363	0.682257	0.0778327	0.743206	0.08305	0.640014	0.0758978	0.598867	0.0711044	0.717215	0.0824571	0.681601	0.0800599	0.669867	0.0798244	0.643863	0.0787363
		0.632393	0.079401	IsoLine	IsoLine			1.09478	0.0646904	1.1159	0.0812261	0.864779	0.0714575	1.80508	0.129424	0.467408	0.0514833	0.769369	0.0805762	0.796929	0.0811984	1.74183	0.131103	0.694316	0.0781378	0.701055	0.0796957	0.748904	0.0829084	0.558087	0.0676075	0.701792	0.0781264	0.684424	0.0781728	0.745621	0.0833331	0.641108	0.0761482	0.600578	0.0714719	0.719949	0.0828265	0.683758	0.0803983	0.671534	0.0801295	0.644736	0.0789512
		0.623754	0.0785372					1.09587	0.0650239	1.11692	0.0815336	0.866021	0.0717386	1.80618	0.129878	0.468268	0.0518313	0.769913	0.0808397	0.797946	0.0815109	1.7462	0.131497	0.69477	0.0783916	0.701562	0.0799317	0.749686	0.0832767	0.558475	0.0678869	0.702734	0.0784131	0.685152	0.0785001	0.746435	0.0836108	0.641471	0.0763779	0.601148	0.0718142	0.72087	0.0831866	0.684483	0.0807248	0.672092	0.0804195	0.645025	0.0791461
		0.62026	0.0782784					ErrEll	ErrEll	ErrEll	ErrEll	ErrEll	ErrEll	ErrEll	ErrEll	ErrEll	ErrEll	ErrEll	ErrEll	ErrEll	ErrEll	ErrEll	ErrEll	ErrEll	ErrEll	ErrEll	ErrEll	ErrEll	ErrEll	ErrEll	ErrEll	ErrEll	ErrEll	ErrEll	ErrEll	ErrEll	ErrEll	ErrEll	ErrEll	ErrEll	ErrEll	ErrEll	ErrEll	ErrEll	ErrEll	ErrEll	ErrEll	ErrEll	ErrEll
		0.632028	0.0795245
		0.629182	0.0792695
		0.622076	0.0785679
		0.630782	0.0794692
		14.4627	0.524013
		0.618376	0.0782038
		0.627726	0.0791971
		0.633417	0.0797877
		0.618796	0.0782788
		0.634417	0.0800017
		0.606781	0.0772877
		0.640623	0.0808374
		0.622572	0.0789677
		0.639938	0.0808572
		0.681117	0.0851184
		0.633013	0.0802707
		0.681803	0.0853212
		0.656098	0.0827439
		0.643597	0.0814712
		0.63459	0.0806674
		0.634952	0.0807185
		0.622891	0.079977
		0.621105	0.080641
		0.83032	0.102932
		0.621721	0.0814637
		0.585507	0.0775982
		IsoLine	IsoLine
[truncated: 78 more columns]

## Sheet: PlotDat3
Source sheet	all data	0.608469	0.0765414	0.56412	0.073	0.557657	0.0723004	0.578841	0.073	0.630332	0.0772512	0.63924	0.0770309	0.620876	0.0781093	0.644434	0.0784782	0.640431	0.0793463	0.647893	0.0792877	0.646413	0.0790011	0.645025	0.0791461	0.643612	0.0791976	0.661329	0.0790033	0.641155	0.0800088	0.644323	0.08003	0.652488	0.0800702	0.659979	0.0799677	0.657402	0.0800479	0.651662	0.0800713	0.651387	0.0804835	0.667745	0.0804264	0.672092	0.0804195	0.661324	0.0804306
Plot name	Concordia1	0.606478	0.0765961	0.56412	0.073	0.565346	0.0731324	0.673993	0.085	0.629904	0.0774718	0.638607	0.0772699	0.620595	0.0782674	0.643979	0.0787034	0.639993	0.0795911	0.647351	0.0795761	0.645875	0.0792628	0.644719	0.0793136	0.643223	0.0793995	0.660572	0.0792686	0.640785	0.0802164	0.643994	0.0802133	0.652031	0.0803094	0.659461	0.0802029	0.656916	0.0802829	0.651254	0.0802749	0.651004	0.0806965	0.667198	0.0807016	0.671521	0.0806834	0.660781	0.080683
Plot Type	1	0.606781	0.0772877	0.567933	0.0734116	0.573073	0.0739651			0.628653	0.0776567	0.63674	0.077483	0.619783	0.0783878	0.642646	0.0788946	0.638725	0.0797825	0.645768	0.0798147	0.644297	0.0794867	0.64383	0.0794471	0.642086	0.0795683	0.658335	0.0795068	0.639715	0.0803759	0.64304	0.0803576	0.650697	0.0805086	0.657937	0.0804069	0.655486	0.0804839	0.65006	0.0804476	0.649891	0.0808645	0.665595	0.0809335	0.669842	0.0809109	0.659187	0.080901
1st free col	109	0.621114	0.0778186	0.571755	0.0738233	0.580838	0.0747984			0.626625	0.0777988	0.633709	0.077662	0.618472	0.0784659	0.640485	0.0790444	0.636674	0.0799133	0.643204	0.0799942	0.641738	0.0796641	0.642393	0.0795415	0.640245	0.0796974	0.654705	0.079709	0.637987	0.0804814	0.641497	0.0804572	0.648535	0.0806602	0.655466	0.0805718	0.653169	0.0806433	0.648125	0.0805827	0.648092	0.080981	0.662999	0.0811132	0.667119	0.0810934	0.656603	0.0810762
Sigma Level	2	0.618376	0.0782038	0.575586	0.0742352	0.588642	0.0756324			0.623901	0.0778925	0.629633	0.0778001	0.616711	0.0784988	0.637579	0.0791472	0.633921	0.0799784	0.639759	0.0801078	0.638298	0.0797883	0.640462	0.0795933	0.63777	0.079782	0.649821	0.0798674	0.635666	0.0805286	0.639426	0.0805085	0.64563	0.0807584	0.652142	0.0806914	0.650054	0.080755	0.645524	0.080675	0.645675	0.0810415	0.659509	0.0812337	0.663458	0.0812238	0.653128	0.0812019
Absolute Errs	FALSE	0.62026	0.0782784	0.579427	0.0746472	0.596484	0.076467			0.620583	0.0779343	0.624666	0.0778919	0.614569	0.0784851	0.634041	0.0791989	0.63057	0.0799753	0.635564	0.0801511	0.634109	0.0798545	0.638111	0.0796004	0.634756	0.0798187	0.643871	0.0799758	0.632842	0.0805159	0.636904	0.0805093	0.642093	0.0807993	0.648094	0.0807609	0.64626	0.0808147	0.642356	0.0807209	0.642734	0.0810437	0.65526	0.0812904	0.658999	0.0812971	0.648895	0.0812732
Symbol Type	1	0.618796	0.0782788	0.583277	0.0750595	0.604365	0.0773023			0.616799	0.0779226	0.619	0.0779339	0.612127	0.0784254	0.630006	0.0791975	0.626751	0.0799041	0.630781	0.0801224	0.629331	0.0798602	0.635432	0.0795625	0.631319	0.0798062	0.637083	0.0800301	0.629623	0.0804437	0.63403	0.0804597	0.63806	0.0807814	0.643477	0.0807778	0.641933	0.08082	0.638743	0.0807188	0.639382	0.0809876	0.650414	0.0812812	0.653913	0.0813105	0.644067	0.0812874
Inverse Plot	FALSE	0.62955	0.0784307	0.587137	0.0754718	0.612285	0.0781382			0.612696	0.0778578	0.612853	0.0779244	0.60948	0.078322	0.625629	0.0791432	0.622609	0.0797676	0.625594	0.0800229	0.624148	0.079805	0.632527	0.0794811	0.627592	0.0797449	0.629719	0.0800282	0.626134	0.0803147	0.630914	0.0803616	0.633685	0.0807055	0.638468	0.0807413	0.63724	0.0807708	0.634824	0.0806686	0.635747	0.0808752	0.645157	0.0812063	0.648396	0.0812634	0.63883	0.081244
Color Plot	TRUE	0.623754	0.0785372	0.591006	0.0758843	0.620244	0.0789747			0.60843	0.0777424	0.606461	0.077864	0.606729	0.0781788	0.621079	0.079038	0.618305	0.079571	0.620202	0.0798563	0.618759	0.0796913	0.629507	0.0793594	0.623717	0.0796372	0.622061	0.0799702	0.622507	0.080134	0.627675	0.0802187	0.629138	0.0805743	0.633261	0.0806529	0.63236	0.080669	0.63075	0.0805723	0.631969	0.0807109	0.639693	0.0810687	0.64266	0.0811578	0.633385	0.0811447
3D plot	FALSE	0.622076	0.0785679	0.594884	0.076297	0.628242	0.0798119			0.604166	0.0775809	0.60007	0.0777548	0.603981	0.0780014	0.61653	0.0788859	0.614004	0.0793218	0.614812	0.0796291	0.613372	0.0795232	0.626489	0.079202	0.619844	0.0794872	0.614403	0.0798583	0.618883	0.0799085	0.624438	0.0800366	0.624592	0.080393	0.628054	0.080516	0.627481	0.0805184	0.626677	0.0804336	0.628194	0.080501	0.63423	0.0808736	0.636925	0.0809976	0.627942	0.0809932
Linear	FALSE	0.622572	0.0789677	0.598772	0.0767099	0.636279	0.0806498			0.600067	0.0773794	0.593925	0.077601	0.60134	0.0777966	0.612157	0.0786928	0.609871	0.0790297	0.609631	0.0793499	0.608193	0.0793073	0.623588	0.079015	0.616121	0.0793008	0.607041	0.0796968	0.615401	0.0796468	0.621327	0.0798222	0.620222	0.0801685	0.623048	0.0803359	0.622791	0.0803249	0.622762	0.0802579	0.624566	0.0802536	0.628978	0.0806286	0.631411	0.080789	0.622708	0.0807953
Data Range	AA3:AE32	0.627726	0.0791971	0.60267	0.0771229	0.644357	0.0814883			0.59629	0.0771457	0.588262	0.0774087	0.598908	0.0775722	0.608129	0.0784661	0.606064	0.0787058	0.604859	0.0790296	0.603422	0.0790519	0.620917	0.0788055	0.612691	0.079085	0.600256	0.0794919	0.612194	0.079359	0.618462	0.0795838	0.616197	0.0799095	0.618436	0.0801194	0.61847	0.0800959	0.619155	0.0800519	0.621224	0.0799782	0.624141	0.0803431	0.626332	0.08054	0.617886	0.0805588
Filled Symbols	TRUE	0.629182	0.0792695	0.606576	0.077536	0.652474	0.0823274			0.592982	0.0768888	0.5833	0.0771851	0.596778	0.0773369	0.604599	0.0782145	0.602731	0.0783627	0.600679	0.0786805	0.599242	0.0787668	0.618577	0.0785816	0.609686	0.0788481	0.59431	0.0792515	0.609386	0.0790562	0.615954	0.0793306	0.612671	0.0796259	0.614395	0.0798749	0.614685	0.0798401	0.615995	0.0798234	0.618298	0.0796853	0.619902	0.080028	0.621881	0.0802602	0.613661	0.0802926
ConcAge	FALSE	0.633288	0.0793903	0.610493	0.0779493	0.660631	0.0831672			0.590269	0.0766185	0.579228	0.0769389	0.595033	0.0770997	0.601704	0.0779477	0.599999	0.0780134	0.597251	0.0783158	0.595813	0.0784629	0.616659	0.0783519	0.607222	0.0785993	0.58943	0.0789849	0.607085	0.0787499	0.613897	0.0790722	0.60978	0.0793286	0.61108	0.0796117	0.611579	0.0795675	0.613403	0.0795814	0.615899	0.0793863	0.616426	0.0796954	0.61823	0.0799603	0.610196	0.080007
ConcSwap	FALSE	0.632393	0.079401	0.614419	0.0783628	0.668829	0.0840077			0.588256	0.0763453	0.576203	0.0766795	0.59374	0.0768697	0.599555	0.0776759	0.597973	0.0776715	0.594707	0.0779498	0.593267	0.0781519	0.615236	0.0781252	0.605394	0.0783481	0.585806	0.0787022	0.605379	0.0784521	0.612373	0.0788186	0.607634	0.079029	0.608618	0.0793401	0.609274	0.0792885	0.611479	0.079335	0.61412	0.0790925	0.613846	0.0793582	0.615518	0.0796519	0.607622	0.079713
1st Symbol-row	1	0.630782	0.0794692	0.618354	0.0787764	0.677067	0.0848488			0.587019	0.0760797	0.574342	0.0764169	0.592947	0.0766558	0.598234	0.0774097	0.596732	0.07735	0.593146	0.0775963	0.591702	0.0778459	0.614364	0.0779103	0.60427	0.0781041	0.583575	0.0784144	0.604334	0.078174	0.611438	0.0785795	0.606316	0.0787386	0.607104	0.0790704	0.607857	0.0790139	0.610297	0.0790938	0.61303	0.0788154	0.612261	0.0790293	0.613852	0.0793468	0.60604	0.0794218
		0.632028	0.0795245	0.622299	0.0791902	IsoLine	IsoLine			0.586606	0.0758317	0.573716	0.0761612	0.592687	0.0764661	0.597793	0.0771591	0.596322	0.0770614	0.592626	0.0772691	0.591179	0.0775564	0.614075	0.0777154	0.603896	0.0778769	0.582824	0.0781324	0.60399	0.0779265	0.611129	0.0783642	0.605877	0.0784687	0.606596	0.078813	0.607383	0.0787541	0.609902	0.078867	0.612669	0.0785655	0.611732	0.0787212	0.613293	0.0790568	0.60551	0.0791447
		0.639738	0.0795738	0.626254	0.0796042					0.587034	0.0756111	0.574349	0.0759222	0.592968	0.0763081	0.598248	0.0769339	0.596759	0.0768166	0.593168	0.0769807	0.591717	0.0772947	0.61438	0.0775479	0.604285	0.0776749	0.583581	0.0778672	0.60436	0.0777189	0.611458	0.0781809	0.606333	0.0782295	0.607115	0.0785777	0.60787	0.0785191	0.610309	0.0786634	0.613053	0.0783525	0.612279	0.078446	0.613864	0.0787929	0.606052	0.0788923
		0.642693	0.0797382	0.630218	0.0800183					0.588286	0.0754262	0.576216	0.0757091	0.593779	0.0761877	0.599581	0.0767427	0.598028	0.0766251	0.594751	0.0767421	0.593295	0.0770709	0.615269	0.0774144	0.605422	0.0775062	0.585818	0.0776289	0.605429	0.0775594	0.612412	0.0780366	0.607668	0.0780303	0.608639	0.0783737	0.609299	0.0783181	0.611503	0.0784907	0.614165	0.0781845	0.613881	0.0782141	0.615544	0.0785654	0.607646	0.0786744
		0.633417	0.0797877	0.634192	0.0804326					0.590313	0.0752841	0.579247	0.0755301	0.595091	0.0761095	0.601742	0.0765928	0.600078	0.0764944	0.597315	0.0765626	0.595854	0.0768934	0.616707	0.07732	0.607263	0.077377	0.589448	0.0774267	0.607158	0.077454	0.613954	0.077937	0.609829	0.0778787	0.61111	0.0782088	0.611616	0.0781587	0.613438	0.0783556	0.615964	0.078068	0.616477	0.0780344	0.618266	0.0783829	0.61023	0.0784992
		0.622891	0.079977	0.638176	0.080847					0.593037	0.0751904	0.583324	0.0753921	0.596852	0.0760767	0.604648	0.0764901	0.602831	0.0764293	0.60076	0.076449	0.599294	0.0767692	0.618638	0.0772682	0.609738	0.0772925	0.594332	0.0772684	0.609479	0.0774067	0.616026	0.0778857	0.612735	0.0777805	0.614433	0.0780892	0.614731	0.078047	0.61604	0.0782634	0.618381	0.0780075	0.619967	0.0779139	0.621927	0.0782526	0.613706	0.0783735
		0.634417	0.0800017	0.64217	0.0812616					0.596355	0.0751486	0.58829	0.0753003	0.598994	0.0760903	0.608186	0.0764384	0.606182	0.0764324	0.604955	0.0764057	0.603483	0.076703	0.620988	0.0772611	0.612752	0.0772557	0.600282	0.07716	0.612303	0.0774194	0.618548	0.0778849	0.616272	0.0777396	0.618482	0.0780197	0.618525	0.0779873	0.619208	0.0782174	0.621322	0.0780053	0.624216	0.0778572	0.626386	0.0781793	0.617938	0.0783022
		0.646481	0.0800862	0.646173	0.0816763					0.600139	0.0751603	0.593956	0.0752583	0.601436	0.07615	0.612221	0.0764397	0.610002	0.0765036	0.609738	0.0764344	0.608262	0.0766973	0.623667	0.077299	0.616188	0.0772683	0.607069	0.0771057	0.615521	0.0774916	0.621422	0.0779345	0.620305	0.0777575	0.623099	0.0780028	0.622852	0.077982	0.622821	0.0782196	0.624674	0.0780615	0.629063	0.0778665	0.631472	0.0781659	0.622766	0.0782879
		0.633013	0.0802707	0.650186	0.0820912					0.604242	0.0752251	0.600103	0.0752677	0.604083	0.0762534	0.616598	0.0764941	0.614143	0.0766401	0.614925	0.0765339	0.613444	0.0767525	0.626573	0.0773803	0.619916	0.0773295	0.614434	0.0771076	0.619011	0.0776206	0.624538	0.0780326	0.62468	0.0778334	0.628107	0.0780393	0.627545	0.0780312	0.626739	0.0782697	0.628309	0.0781739	0.634319	0.0779413	0.636989	0.0782129	0.628003	0.0783313
		0.63459	0.0806674	0.654208	0.0825063					0.608508	0.0753405	0.606495	0.0753282	0.606833	0.0763966	0.621148	0.0765993	0.618447	0.0768367	0.620317	0.0767005	0.618833	0.0768662	0.629593	0.0775021	0.62379	0.0774372	0.622092	0.0771656	0.622638	0.0778013	0.627777	0.0781755	0.629227	0.0779646	0.633315	0.0781277	0.632425	0.078133	0.630814	0.078366	0.632087	0.0783381	0.639784	0.0780789	0.642725	0.0783186	0.633448	0.0784307
		0.634952	0.0807185	0.658241	0.0829215					0.612772	0.075502	0.612886	0.0754374	0.609582	0.076574	0.625697	0.0767514	0.622748	0.0770859	0.625707	0.0769277	0.62422	0.0770343	0.632611	0.0776595	0.627664	0.0775872	0.629749	0.0772775	0.626262	0.0780268	0.631014	0.0783576	0.633773	0.0781459	0.638522	0.0782646	0.637304	0.0782836	0.634886	0.0785047	0.635862	0.078548	0.645246	0.078274	0.64846	0.0784788	0.638892	0.0785822
		0.640623	0.0808374	0.662283	0.0833369					0.616872	0.0757035	0.619031	0.0755911	0.612223	0.0767788	0.63007	0.0769445	0.626881	0.077378	0.630888	0.0772069	0.629399	0.0772502	0.635511	0.0778465	0.631387	0.0777737	0.637112	0.077439	0.629744	0.0782885	0.634125	0.078572	0.638143	0.0783704	0.643528	0.0784447	0.641994	0.0784771	0.638802	0.0786804	0.639491	0.0787954	0.650498	0.078519	0.653974	0.0786874	0.644125	0.07878
		0.639938	0.0808572	0.666335	0.0837524					0.620648	0.0759372	0.624694	0.0757835	0.614655	0.0770032	0.634098	0.0771712	0.630688	0.0777018	0.63566	0.0775272	0.63417	0.0775056	0.638183	0.078056	0.634817	0.0779895	0.643897	0.0776438	0.632951	0.0785763	0.636989	0.0788104	0.642168	0.0786294	0.64814	0.0786612	0.646315	0.0787061	0.642409	0.0788864	0.642832	0.0790709	0.655335	0.0788045	0.659053	0.0789364	0.648947	0.0790166
		0.643597	0.0814712	0.670397	0.0841681					0.623956	0.0761941	0.629656	0.076007	0.616784	0.0772385	0.637628	0.0774228	0.634021	0.078045	0.63984	0.0778763	0.63835	0.0777907	0.640523	0.0782799	0.637822	0.0782264	0.649843	0.0778842	0.635758	0.0788791	0.639498	0.0790637	0.645694	0.078913	0.652181	0.0789057	0.6501	0.0789619	0.645569	0.0791149	0.645758	0.0793637	0.659574	0.0791196	0.663504	0.0792162	0.653172	0.0792828
		0.665545	0.0821987	0.674469	0.084584					0.626669	0.0764643	0.633728	0.0762533	0.618529	0.0774758	0.640523	0.0776896	0.636753	0.0783942	0.643268	0.078241	0.641779	0.0780946	0.642441	0.0785096	0.640286	0.0784752	0.654722	0.0781509	0.63806	0.0791854	0.641554	0.0793221	0.648585	0.0792103	0.655496	0.0791689	0.653206	0.0792345	0.648161	0.0793569	0.648157	0.0796628	0.66305	0.0794522	0.667156	0.079516	0.656638	0.0795684
		IsoLine	IsoLine	0.678551	0.085					0.628682	0.0767376	0.636753	0.0765126	0.619823	0.0777057	0.642672	0.0779613	0.638779	0.0787362	0.645812	0.078607	0.644325	0.0784056	0.643863	0.0787363	0.642114	0.0787264	0.658347	0.0784336	0.639766	0.0794832	0.643079	0.0795756	0.650731	0.0795099	0.657958	0.0794405	0.655511	0.0795135	0.650085	0.0796033	0.649936	0.0799565	0.66563	0.0797894	0.669867	0.0798244	0.659211	0.0798624
				0.678551	0.085					0.629919	0.0770032	0.638614	0.0767752	0.620615	0.0779197	0.643993	0.0782276	0.640021	0.0790576	0.647374	0.0789605	0.64589	0.0787116	0.644736	0.0789512	0.643238	0.0789703	0.660578	0.0787214	0.640811	0.0797613	0.644014	0.0798147	0.652049	0.0798003	0.659472	0.0797102	0.656928	0.0797881	0.651267	0.0798445	0.651026	0.0802336	0.667215	0.0801184	0.671534	0.0801295	0.660793	0.0801535
				IsoLine	IsoLine					0.630332	0.0772512	0.63924	0.0770309	0.620876	0.0781093	0.644434	0.0784782	0.640431	0.0793463	0.647893	0.0792877	0.646413	0.0790011	0.645025	0.0791461	0.643612	0.0791976	0.661329	0.0790033	0.641155	0.0800088	0.644323	0.08003	0.652488	0.0800702	0.659979	0.0799677	0.657402	0.0800479	0.651662	0.0800713	0.651387	0.0804835	0.667745	0.0804264	0.672092	0.0804195	0.661324	0.0804306
										ErrEll	ErrEll	ErrEll	ErrEll	ErrEll	ErrEll	ErrEll	ErrEll	ErrEll	ErrEll	ErrEll	ErrEll	ErrEll	ErrEll	ErrEll	ErrEll	ErrEll	ErrEll	ErrEll	ErrEll	ErrEll	ErrEll	ErrEll	ErrEll	ErrEll	ErrEll	ErrEll	ErrEll	ErrEll	ErrEll	ErrEll	ErrEll	ErrEll	ErrEll	ErrEll	ErrEll	ErrEll	ErrEll	ErrEll	ErrEll
[truncated: 58 more columns]

## Sheet: PlotDat4
Source sheet	all data	0.2	476.289	1	468.317	63.1636	0.85	405.154
Plot name	Average1	9.8	476.289	2	473.568	46.1233	1.15	405.154
Plot Type	15			3	474.134	43.7722	1.15	531.481
1st free col	8			4	474.212	50.0602	0.85	531.481
Sigma Level	2			5	475.446	32.4675	0.85	405.154
Absolute Errs	FALSE			6	475.773	31.216	ErrBox	ErrBox
Symbol Type	1			7	477.774	47.3906	1.85	427.445
Inverse Plot	FALSE			8	478.988	43.5199	2.15	427.445
Color Plot	TRUE			9	479.913	28.4534	2.15	519.691
3D plot	FALSE			IsoLine	IsoLine	IsoLine	1.85	519.691
Linear	FALSE						1.85	427.445
Data Range	AJ3:AK11						ErrBox	ErrBox
Filled Symbols	TRUE						2.85	430.362
ConcAge	FALSE						3.15	430.362
ConcSwap	FALSE						3.15	517.906
1st Symbol-row	1						2.85	517.906
							2.85	430.362
							ErrBox	ErrBox
							3.85	424.152
							4.15	424.152
							4.15	524.273
							3.85	524.273
							3.85	424.152
							ErrBox	ErrBox
							4.85	442.978
							5.15	442.978
							5.15	507.913
							4.85	507.913
							4.85	442.978
							ErrBox	ErrBox
							5.85	444.557
							6.15	444.557
							6.15	506.989
							5.85	506.989
							5.85	444.557
							ErrBox	ErrBox
							6.85	430.383
							7.15	430.383
							7.15	525.165
							6.85	525.165
							6.85	430.383
							ErrBox	ErrBox
							7.85	435.468
							8.15	435.468
							8.15	522.507
							7.85	522.507
							7.85	435.468
							ErrBox	ErrBox
							8.85	451.46
							9.15	451.46
							9.15	508.366
							8.85	508.366
							8.85	451.46
							ErrBox	ErrBox

## Sheet: PlotDat2
Source sheet	all data	0.593291	0.0762279	460		465		470		475		480		485		490		0.568753	0.0735	0.569978	0.0735	0.573073	0.0739651	0.629511	0.0770797	0.656838	0.0768134	0.652607	0.0770325	0.630332	0.0772512	0.63924	0.0770309	0.624056	0.0783533	0.616517	0.0769152
Plot name	Concordia0	0.599883	0.0763224	0.574259	0.0739651	0.582043	0.0747984	0.589866	0.0756324	0.597727	0.076467	0.605627	0.0773023	0.613567	0.0781382	0.621545	0.0789747	0.568753	0.0735	0.570668	0.0735742	0.580838	0.0747984	0.628807	0.0774139	0.655741	0.077159	0.651593	0.077417	0.629904	0.0774718	0.638607	0.0772699	0.623603	0.0786074	0.616235	0.0770559
Plot Type	1	0.600123	0.0763355	0.574236	0.0739847	0.58202	0.0748182	0.589842	0.0756524	0.597703	0.0764873	0.605603	0.0773227	0.613542	0.0781589	0.62152	0.0789957	0.570668	0.0737063	0.572586	0.0737802	0.588642	0.0756324	0.626738	0.0777025	0.652497	0.0774725	0.648601	0.0777599	0.628653	0.0776567	0.63674	0.077483	0.622296	0.0787971	0.615406	0.0771756
1st free col	39	0.608469	0.0765414	0.574169	0.0740035	0.581952	0.0748373	0.589773	0.0756717	0.597633	0.0765067	0.605531	0.0773425	0.613469	0.0781788	0.621446	0.0790158	0.572586	0.0739127	0.574506	0.0739862	0.596484	0.076467	0.623384	0.0779344	0.647231	0.0777418	0.643747	0.0780481	0.626625	0.0777988	0.633709	0.077662	0.620187	0.0789151	0.614063	0.0772698
Sigma Level	2	0.606478	0.0765961	0.574059	0.0740209	0.58184	0.0748548	0.58966	0.0756894	0.597518	0.0765247	0.605415	0.0773606	0.613351	0.0781972	0.621326	0.0790344	0.574506	0.0741191	0.576428	0.0741923	0.604365	0.0773023	0.618873	0.0781008	0.640145	0.0779566	0.637215	0.0782705	0.623901	0.0778925	0.629633	0.0778001	0.617357	0.0789567	0.612258	0.0773349
Absolute Errs	FALSE	0.601403	0.0769303	0.573912	0.0740361	0.58169	0.0748702	0.589507	0.075705	0.597363	0.0765404	0.605258	0.0773765	0.613191	0.0782133	0.621164	0.0790507	0.576428	0.0743256	0.578353	0.0743984	0.612285	0.0781382	0.613379	0.0781951	0.631513	0.0781085	0.629259	0.0784186	0.620583	0.0779343	0.624666	0.0778919	0.613913	0.0789205	0.610059	0.0773682
Symbol Type	1	IsoLine	IsoLine	0.573732	0.0740485	0.581508	0.0748828	0.589322	0.0757178	0.597175	0.0765534	0.605066	0.0773896	0.612997	0.0782265	0.620967	0.079064	0.578353	0.0745321	0.58028	0.0746046	0.620244	0.0789747	0.607113	0.0782139	0.621664	0.0781919	0.620183	0.0784866	0.616799	0.0779226	0.619	0.0779339	0.609988	0.0788079	0.607551	0.0773687
Inverse Plot	FALSE			0.573527	0.0740578	0.581299	0.0748922	0.58911	0.0757273	0.59696	0.076563	0.604848	0.0773993	0.612775	0.0782363	0.620742	0.0790739	0.58028	0.0747386	0.58221	0.0748108	IsoLine	IsoLine	0.600316	0.0781564	0.610979	0.0782033	0.610336	0.0784719	0.612696	0.0778578	0.612853	0.0779244	0.605733	0.078623	0.604832	0.0773361
Color Plot	TRUE			0.573304	0.0740635	0.581073	0.074898	0.588881	0.0757331	0.596727	0.0765689	0.604611	0.0774053	0.612535	0.0782423	0.620497	0.0790801	0.58221	0.0749452	0.584141	0.075017			0.593249	0.0780247	0.599867	0.0781425	0.600096	0.0783751	0.60843	0.0777424	0.606461	0.077864	0.601312	0.0783731	0.602004	0.0772719
3D plot	FALSE			0.573073	0.0740655	0.580838	0.0748999	0.588642	0.0757351	0.596484	0.0765709	0.604365	0.0774073	0.612285	0.0782444	0.620244	0.0790821	0.584141	0.0751518	0.586075	0.0752233			0.586183	0.077824	0.588756	0.0780118	0.589857	0.0782	0.604166	0.0775809	0.60007	0.0777548	0.596895	0.0780678	0.599177	0.0771784
Linear	FALSE			0.572842	0.0740635	0.580603	0.074898	0.588403	0.0757331	0.596242	0.0765689	0.604119	0.0774053	0.612035	0.0782423	0.61999	0.0790801	0.586075	0.0753585	0.588012	0.0754296			0.579391	0.077562	0.578073	0.0778161	0.580013	0.0779531	0.600067	0.0773794	0.593925	0.077601	0.59265	0.0777188	0.59646	0.0770592
Data Range	AA4:AE9			0.572619	0.0740578	0.580377	0.0748922	0.588174	0.0757273	0.596008	0.076563	0.603882	0.0773993	0.611794	0.0782363	0.619746	0.0790739	0.588012	0.0755652	0.589951	0.075636			0.573133	0.0772487	0.568227	0.077563	0.570942	0.0776442	0.59629	0.0771457	0.588262	0.0774087	0.588742	0.0773394	0.593956	0.076919
Filled Symbols	TRUE			0.572414	0.0740485	0.580169	0.0748828	0.587962	0.0757178	0.595793	0.0765534	0.603664	0.0773896	0.611573	0.0782265	0.619521	0.079064	0.589951	0.0757719	0.591892	0.0758424			0.56765	0.0768961	0.559598	0.0772623	0.562992	0.0772849	0.592982	0.0768888	0.5833	0.0771851	0.585321	0.0769443	0.591763	0.0767631
ConcAge	TRUE			0.572234	0.0740361	0.579986	0.0748702	0.587776	0.075705	0.595605	0.0765404	0.603472	0.0773765	0.611378	0.0782133	0.619323	0.0790507	0.591892	0.0759787	0.593836	0.0760488			0.563152	0.0765179	0.552518	0.0769254	0.556469	0.0768891	0.590269	0.0766185	0.579228	0.0769389	0.582518	0.0765487	0.589964	0.0765975
ConcSwap	FALSE			0.572087	0.0740209	0.579836	0.0748548	0.587624	0.0756894	0.59545	0.0765247	0.603315	0.0773606	0.611219	0.0781972	0.619161	0.0790344	0.593836	0.0761855	0.595782	0.0762553			0.559812	0.0761285	0.547257	0.0765654	0.551624	0.0764721	0.588256	0.0763453	0.576203	0.0766795	0.58044	0.0761678	0.588628	0.0764286
1st Symbol-row	1			0.571977	0.0740035	0.579725	0.0748373	0.587511	0.0756717	0.595336	0.0765067	0.603199	0.0773425	0.6111	0.0781788	0.619041	0.0790158	0.595782	0.0763924	0.59773	0.0764618			0.557759	0.075743	0.544019	0.076196	0.548643	0.0760498	0.587019	0.0760797	0.574342	0.0764169	0.579168	0.0758162	0.587807	0.0762628
				0.57191	0.0739847	0.579656	0.0748182	0.587441	0.0756524	0.595265	0.0764873	0.603127	0.0773227	0.611028	0.0781589	0.618967	0.0789957	0.59773	0.0765993	0.599681	0.0766683			0.557071	0.0753761	0.542928	0.0758315	0.547639	0.0756385	0.586606	0.0758317	0.573716	0.0761612	0.57875	0.0755073	0.587533	0.0761066
				0.571887	0.0739651	0.579633	0.0747984	0.587418	0.0756324	0.595241	0.076467	0.603103	0.0773023	0.611003	0.0781382	0.618942	0.0789747	0.599681	0.0768062	0.601634	0.0768749			0.557775	0.0750419	0.544025	0.0754858	0.548653	0.075254	0.587034	0.0756111	0.574349	0.0759222	0.579203	0.0752532	0.587816	0.0759659
				0.57191	0.0739455	0.579656	0.0747786	0.587441	0.0756123	0.595265	0.0764467	0.603127	0.0772818	0.611028	0.0781174	0.618967	0.0789538	0.601634	0.0770132	0.603589	0.0770815			0.559844	0.0747533	0.547269	0.0751723	0.551645	0.0749111	0.588286	0.0754262	0.576216	0.0757091	0.580509	0.0750635	0.588644	0.0758462
				0.571977	0.0739267	0.579725	0.0747596	0.587511	0.0755931	0.595336	0.0764272	0.603199	0.0772621	0.6111	0.0780975	0.619041	0.0789336	0.603589	0.0772202	0.605547	0.0772882			0.563199	0.0745214	0.552535	0.074903	0.5565	0.0746228	0.590313	0.0752841	0.579247	0.0755301	0.582618	0.0749456	0.589987	0.075752
				0.572087	0.0739093	0.579836	0.074742	0.587624	0.0755753	0.59545	0.0764093	0.603315	0.0772439	0.611219	0.0780791	0.619161	0.078915	0.605547	0.0774273	0.607507	0.0774949			0.567709	0.074355	0.559621	0.0746883	0.563031	0.0744004	0.593037	0.0751904	0.583324	0.0753921	0.585449	0.0749039	0.591793	0.0756869
				0.572234	0.0738941	0.579986	0.0747266	0.587776	0.0755598	0.595605	0.0763935	0.603472	0.077228	0.611378	0.078063	0.619323	0.0788988	0.607507	0.0776344	0.60947	0.0777017			0.573203	0.0742606	0.568253	0.0745363	0.570987	0.0742524	0.596355	0.0751486	0.58829	0.0753003	0.588893	0.0749401	0.593991	0.0756535
				0.572414	0.0738817	0.580169	0.074714	0.587962	0.075547	0.595793	0.0763806	0.603664	0.0772149	0.611573	0.0780498	0.619521	0.0788854	0.60947	0.0778415	0.611435	0.0779085			0.579469	0.0742418	0.578102	0.074453	0.580063	0.0741844	0.600139	0.0751603	0.593956	0.0752583	0.592818	0.0750528	0.596499	0.0756531
				0.572619	0.0738724	0.580377	0.0747046	0.588174	0.0755375	0.596008	0.076371	0.603882	0.0772052	0.611794	0.07804	0.619746	0.0788755	0.611435	0.0780487	0.613403	0.0781153			0.586266	0.0742994	0.588787	0.0744415	0.589911	0.0741991	0.604242	0.0752251	0.600103	0.0752677	0.597072	0.0752376	0.599219	0.0756857
				0.572842	0.0738667	0.580603	0.0746988	0.588403	0.0755317	0.596242	0.0763651	0.604119	0.0771992	0.612035	0.078034	0.61999	0.0788694	0.613403	0.0782559	0.615373	0.0783222			0.593333	0.074431	0.599899	0.0745023	0.60015	0.0742959	0.608508	0.0753405	0.606495	0.0753282	0.601493	0.0754875	0.602046	0.0757499
				0.573073	0.0738647	0.580838	0.0746969	0.588642	0.0755297	0.596484	0.0763631	0.604365	0.0771972	0.612285	0.0780319	0.620244	0.0788673	0.615373	0.0784631	0.617345	0.0785291			0.600399	0.0746317	0.61101	0.0746331	0.610389	0.074471	0.612772	0.075502	0.612886	0.0754374	0.605911	0.0757928	0.604873	0.0758434
				0.573304	0.0738667	0.581073	0.0746988	0.588881	0.0755317	0.596727	0.0763651	0.604611	0.0771992	0.612535	0.078034	0.620497	0.0788694	0.617345	0.0786704	0.619319	0.078736			0.607191	0.0748938	0.621693	0.0748287	0.620233	0.0747178	0.616872	0.0757035	0.619031	0.0755911	0.610155	0.0761419	0.607591	0.0759625
				0.573527	0.0738724	0.581299	0.0747046	0.58911	0.0755375	0.59696	0.076371	0.604848	0.0772052	0.612775	0.07804	0.620742	0.0788755	0.619319	0.0788778	0.621297	0.078943			0.613449	0.0752071	0.631539	0.0750818	0.629304	0.0750268	0.620648	0.0759372	0.624694	0.0757835	0.614063	0.0765212	0.610094	0.0761028
				0.573732	0.0738817	0.581508	0.074714	0.589322	0.075547	0.597175	0.0763806	0.605066	0.0772149	0.612997	0.0780498	0.620967	0.0788854	0.621297	0.0790851	0.623276	0.07915			0.618932	0.0755596	0.640167	0.0753826	0.637254	0.0753861	0.623956	0.0761941	0.629656	0.076007	0.617485	0.0769163	0.612288	0.0762587
				0.573912	0.0738941	0.58169	0.0747266	0.589507	0.0755598	0.597363	0.0763935	0.605258	0.077228	0.613191	0.078063	0.621164	0.0788988	0.623276	0.0792925	0.625258	0.0793571			0.62343	0.0759378	0.647248	0.0757194	0.643777	0.0757818	0.626669	0.0764643	0.633728	0.0762533	0.620288	0.0773119	0.614087	0.0764243
				0.574059	0.0739093	0.58184	0.074742	0.58966	0.0755753	0.597518	0.0764093	0.605415	0.0772439	0.613351	0.0780791	0.621326	0.078915	0.625258	0.0795	0.626627	0.0795			0.62677	0.0763272	0.652509	0.0760795	0.648622	0.0761989	0.628682	0.0767376	0.636753	0.0765126	0.622366	0.0776928	0.615422	0.0765932
				0.574169	0.0739267	0.581952	0.0747596	0.589773	0.0755931	0.597633	0.0764272	0.605531	0.0772621	0.613469	0.0780975	0.621446	0.0789336	0.625258	0.0795	0.623895	0.0795			0.628823	0.0767128	0.655747	0.0764488	0.651604	0.0766212	0.629919	0.0770032	0.638614	0.0767752	0.623638	0.0780445	0.616243	0.0767589
				0.574236	0.0739455	0.58202	0.0747786	0.589842	0.0756123	0.597703	0.0764467	0.605603	0.0772818	0.613542	0.0781174	0.62152	0.0789538	IsoLine	IsoLine	0.623276	0.0794351			0.629511	0.0770797	0.656838	0.0768134	0.652607	0.0770325	0.630332	0.0772512	0.63924	0.0770309	0.624056	0.0783533	0.616517	0.0769152
				0.574259	0.0739651	0.582043	0.0747984	0.589866	0.0756324	0.597727	0.076467	0.605627	0.0773023	0.613567	0.0781382	0.621545	0.0789747			0.621297	0.0792273			ErrEll	ErrEll	ErrEll	ErrEll	ErrEll	ErrEll	ErrEll	ErrEll	ErrEll	ErrEll	ErrEll	ErrEll	ErrEll	ErrEll
				ConcTikEll	ConcTikEll	ConcTikEll	ConcTikEll	ConcTikEll	ConcTikEll	ConcTikEll	ConcTikEll	ConcTikEll	ConcTikEll	ConcTikEll	ConcTikEll	ConcTikEll	ConcTikEll			0.619319	0.0790195
																				0.617345	0.0788118
																				0.615373	0.0786041
																				0.613403	0.0783965
																				0.611435	0.0781889
																				0.60947	0.0779813
																				0.607507	0.0777738
																				0.605547	0.0775663
																				0.603589	0.0773589
																				0.601634	0.0771515
																				0.599681	0.0769441
																				0.59773	0.0767368
																				0.595782	0.0765295
																				0.593836	0.0763223
																				0.591892	0.0761151
																				0.589951	0.0759079
																				0.588012	0.0757008
																				0.586075	0.0754937
																				0.584141	0.0752866
																				0.58221	0.0750796
																				0.58028	0.0748727
																				0.578353	0.0746658
																				0.576428	0.0744589
																				0.574506	0.074252
																				0.572586	0.0740452
																				0.570668	0.0738385
																				0.568753	0.0736318
																				0.567533	0.0735
																				0.569978	0.0735
																				ConcBand	ConcBand

## Sheet: PlotDat0
Source sheet	all data	0.581682	0.0753517	0.45	0.0602713	0.482812	0.0640155	0.636753	0.0764145	0.629511	0.0770797	0.622572	0.0789677	0.641155	0.0800088	0.652869	0.0800925	0.655798	0.0800153	0.655513	0.0804267	0.644323	0.08003	0.652488	0.0800702	0.651662	0.0800713	0.651387	0.0804835	0.673812	0.0806154	0.661324	0.0804306	0.656362	0.0808868	0.648595	0.0805758	0.659088	0.0807109	0.683191	0.080983	0.658005	0.0810178	0.660592	0.0809509	0.674342	0.0819622	0.66356	0.0813398
Plot name	Concordia1	0.593291	0.0762279	0.452903	0.0606061	0.512308	0.0673218	0.635994	0.0768176	0.628711	0.0774347	0.622962	0.0790374	0.640735	0.0802286	0.652203	0.0804222	0.655138	0.0803325	0.654835	0.0807729	0.64395	0.0802242	0.651969	0.080324	0.651199	0.0802875	0.650952	0.0807092	0.672836	0.0810127	0.660707	0.0806987	0.655707	0.0812043	0.648028	0.0808268	0.658541	0.0809662	0.682567	0.0813103	0.65732	0.0813383	0.659982	0.0812234	0.673839	0.0822948	0.66292	0.0816205
Plot Type	1	0.599883	0.0763224	0.462805	0.0617414	0.542391	0.0706383	0.633753	0.0771807	0.626363	0.0777369	0.626108	0.07907	0.639522	0.0803932	0.650259	0.0806913	0.65321	0.0805945	0.652862	0.081049	0.642867	0.0803735	0.650455	0.0805317	0.649844	0.0804679	0.649689	0.0808831	0.669965	0.081356	0.658898	0.080927	0.653791	0.0814667	0.646361	0.0810406	0.65694	0.0811794	0.680727	0.0816044	0.655315	0.0816068	0.658194	0.0814542	0.672375	0.0825736	0.661042	0.0818595
1st free col	65	0.600123	0.0763355	0.472774	0.0628778	0.573073	0.0739651	0.630092	0.0774939	0.622569	0.0779732	0.625198	0.0791677	0.637568	0.0804956	0.647122	0.0808881	0.650097	0.0807898	0.64968	0.0812428	0.641123	0.0804714	0.648011	0.0806843	0.647655	0.0806047	0.647655	0.0809977	0.665326	0.0816303	0.655975	0.0811055	0.650699	0.0816627	0.643669	0.081208	0.654354	0.0813412	0.67772	0.0818573	0.652076	0.0818116	0.655305	0.0816334	0.66999	0.082791	0.658008	0.0820464
Sigma Level	2	0.608469	0.0765414	0.482812	0.0640155	0.604365	0.0773023	0.625111	0.0777487	0.617496	0.0781332	0.627726	0.0791971	0.634958	0.0805311	0.642929	0.081004	0.645936	0.08091	0.645427	0.0813459	0.638793	0.0805137	0.644744	0.080775	0.64473	0.0806918	0.644938	0.0810478	0.659121	0.0818236	0.652067	0.0812263	0.646565	0.0817836	0.640069	0.0813215	0.650897	0.0814444	0.673629	0.082062	0.647746	0.0819439	0.651442	0.0817529	0.66675	0.0829411	0.65395	0.0821731
Absolute Errs	FALSE	0.606478	0.0765961	0.492917	0.0651545	0.636279	0.0806498	0.618945	0.0779381	0.611365	0.0782099	0.629182	0.0792695	0.631807	0.0804983	0.637864	0.081034	0.640908	0.0809498	0.640291	0.0813539	0.63598	0.0804983	0.640796	0.0807999	0.641194	0.0807256	0.641657	0.0810314	0.651621	0.0819274	0.647343	0.0812843	0.641571	0.0818242	0.635717	0.0813763	0.64672	0.0814845	0.668564	0.082213	0.642513	0.0819977	0.646773	0.0818077	0.662742	0.0830198	0.649046	0.0822339
Symbol Type	1	0.601403	0.0769303	0.503092	0.0662946	0.668829	0.0840077	0.611762	0.0780569	0.604443	0.0782	0.630782	0.0794692	0.628253	0.0803987	0.632147	0.0809767	0.635234	0.0809074	0.634495	0.0812662	0.632806	0.0804261	0.636342	0.0807579	0.637204	0.0807044	0.637954	0.0809492	0.643154	0.0819373	0.642011	0.0812769	0.635934	0.0817827	0.630806	0.0813699	0.642005	0.0814599	0.662665	0.0823061	0.636607	0.0819708	0.641503	0.0817953	0.658077	0.0830249	0.643511	0.0822263
Inverse Plot	FALSE	0.61287	0.0771331	0.513336	0.067436	0.702025	0.087376	0.603759	0.078102	0.597035	0.0781039	0.632028	0.0795245	0.62445	0.0802365	0.626028	0.0808347	0.62916	0.0807848	0.628293	0.0810869	0.62941	0.0803002	0.631574	0.0806509	0.632933	0.0806292	0.633993	0.0808046	0.634091	0.0818527	0.636303	0.0812044	0.629901	0.081661	0.625548	0.0813027	0.636958	0.0813715	0.656092	0.0823389	0.630286	0.0818644	0.635862	0.0817163	0.652881	0.0829563	0.637585	0.0821505
Color Plot	FALSE	0.606781	0.0772877	0.523649	0.0685786	0.735883	0.0907549	0.595154	0.078072	0.589463	0.0779259	0.629496	0.079777	0.620565	0.0800188	0.619776	0.0806141	0.622954	0.0805871	0.621955	0.0808237	0.62594	0.0801261	0.626702	0.0804835	0.628568	0.0805033	0.629946	0.0806042	0.624826	0.0816775	0.630469	0.08107	0.623735	0.0814642	0.620174	0.0811775	0.631801	0.0812232	0.649025	0.0823103	0.623825	0.081683	0.630096	0.0815741	0.647296	0.0828159	0.631529	0.08201
3D plot	FALSE	0.621114	0.0778186	0.534033	0.0697224	0.770413	0.0941442	0.586181	0.0779678	0.582058	0.0776736	0.633417	0.0797877	0.616768	0.0797552	0.613663	0.0803246	0.616885	0.0803232	0.61576	0.0804881	0.622548	0.0799114	0.621938	0.080263	0.624299	0.0803323	0.62599	0.0803565	0.615765	0.0814191	0.624763	0.0808796	0.617707	0.0812011	0.614919	0.0809998	0.626757	0.0810216	0.641655	0.0822213	0.617508	0.0814346	0.624458	0.0813749	0.641474	0.0826075	0.625606	0.0818107
Linear	FALSE	0.618376	0.0782038	0.544488	0.0708674	0.805631	0.097544	0.577085	0.0777923	0.575144	0.0773581	0.62687	0.0799456	0.613224	0.0794572	0.607956	0.0799788	0.611219	0.0800045	0.609976	0.0800949	0.619383	0.0796654	0.617491	0.0799991	0.620314	0.0801235	0.622298	0.0800725	0.607305	0.081089	0.619436	0.0806414	0.612078	0.0808831	0.610013	0.0807775	0.622048	0.0807754	0.634185	0.0820742	0.61161	0.0811301	0.619194	0.0811275	0.635575	0.0823368	0.620076	0.0815615
Data Range	AA3:AE102	0.62026	0.0782784	0.555014	0.0720136	IsoLine	IsoLine	0.568115	0.0775502	0.569024	0.0769932	0.622891	0.079977	0.61009	0.0791377	0.602905	0.0795919	0.606204	0.079645	0.604858	0.0796611	0.616582	0.079399	0.613555	0.0797033	0.616787	0.0798861	0.619031	0.0797645	0.599814	0.0807016	0.61472	0.0803659	0.607097	0.0805241	0.605669	0.0805201	0.61788	0.0804954	0.626818	0.081873	0.606388	0.0807828	0.614534	0.0808426	0.629759	0.0820111	0.61518	0.0812732
Filled Symbols	FALSE	0.618796	0.0782788	0.565612	0.0731611			0.559515	0.0772481	0.563963	0.0765949	0.634417	0.0800017	0.6075	0.0788109	0.598731	0.0791808	0.602059	0.0792603	0.600629	0.0792057	0.614268	0.0791238	0.610301	0.0793886	0.613871	0.0796305	0.616332	0.079446	0.593621	0.0802738	0.610821	0.0800651	0.602979	0.0801399	0.602078	0.0802391	0.614435	0.0801938	0.619755	0.0816233	0.602073	0.0804078	0.610681	0.0805328	0.624185	0.0816394	0.611133	0.0809584
ConcAge	FALSE	0.62955	0.0784307	0.576282	0.0743098			0.55152	0.0768943	0.560185	0.0761806	0.637961	0.0800923	0.60557	0.0784909	0.595615	0.0787634	0.598965	0.0788673	0.597474	0.0787487	0.612543	0.0788517	0.607873	0.0790686	0.611694	0.0793678	0.614319	0.079131	0.588996	0.0798242	0.60791	0.0797522	0.599906	0.0797471	0.599396	0.0799465	0.611863	0.0798838	0.613188	0.0813317	0.59885	0.0800216	0.607804	0.0802114	0.619004	0.0812318	0.608111	0.080631
ConcSwap	FALSE	0.61183	0.0784918	0.587024	0.0754598			0.544347	0.0764984	0.557854	0.0757683	0.627101	0.0801503	0.604382	0.0781917	0.593695	0.0783579	0.597057	0.0784832	0.595531	0.07831	0.611481	0.0785948	0.606377	0.0787575	0.610351	0.0791096	0.61308	0.0788332	0.58614	0.0793726	0.606113	0.0794409	0.598011	0.0793631	0.597741	0.0796553	0.610276	0.0795789	0.607297	0.0810064	0.596863	0.079641	0.606029	0.0798927	0.614359	0.0807994	0.606246	0.0803051
1st Symbol-row	1	0.623754	0.0785372	0.59784	0.076611			0.538193	0.0760712	0.557071	0.0753761	0.633013	0.0802707	0.60399	0.0779265	0.593054	0.0779822	0.596419	0.0781247	0.594884	0.0779087	0.611129	0.0783642	0.605877	0.0784687	0.609902	0.078867	0.612669	0.0785655	0.58518	0.0789387	0.60551	0.0791447	0.597377	0.0790045	0.597186	0.0793782	0.609745	0.0792926	0.602243	0.0806562	0.596197	0.0792827	0.605434	0.0795905	0.610375	0.080354	0.605619	0.079995
		0.617646	0.0785417	0.60873	0.0777634			0.533225	0.0756244	0.557871	0.0750211	0.638623	0.080323	0.604409	0.0777067	0.59372	0.0776525	0.597079	0.0778075	0.595562	0.0775625	0.611502	0.07817	0.606395	0.0782149	0.610365	0.0786508	0.613105	0.0783398	0.586156	0.0785414	0.606126	0.0788766	0.598032	0.078687	0.597754	0.0791272	0.610292	0.0790372	0.598163	0.0802905	0.596882	0.0789622	0.606044	0.079318	0.607162	0.0799078	0.606259	0.0797143
		0.622076	0.0785679	0.619693	0.078917			0.529579	0.0751702	0.560219	0.0747189	0.63459	0.0806674	0.605623	0.0775421	0.595664	0.0773834	0.599007	0.0775455	0.597535	0.0772865	0.612585	0.0780207	0.60791	0.0780072	0.61172	0.0784704	0.614367	0.0781659	0.589026	0.0781981	0.607935	0.0786484	0.599948	0.0784245	0.59942	0.0789134	0.611893	0.078824	0.595168	0.0799195	0.598888	0.0786937	0.607832	0.0790871	0.604808	0.0794728	0.608137	0.0794753
		0.622245	0.0786182	0.630732	0.0800719			0.527354	0.0747209	0.564013	0.0744826	0.634952	0.0807185	0.607577	0.0774398	0.598801	0.0771866	0.60212	0.0773502	0.600717	0.0770927	0.614329	0.0779228	0.610354	0.0778546	0.613908	0.0783336	0.616401	0.0780514	0.593665	0.0779238	0.610858	0.0784699	0.60304	0.0782286	0.602112	0.0787461	0.614479	0.0786623	0.593341	0.0795531	0.602126	0.0784889	0.610721	0.078908	0.603375	0.0790611	0.611172	0.0792884
		0.622572	0.0789677	0.641846	0.081228			0.52661	0.0742888	0.569086	0.0743226	IsoLine	IsoLine	0.610187	0.0774042	0.602994	0.0770707	0.606281	0.07723	0.604969	0.0769895	0.616658	0.0778806	0.613621	0.0777639	0.616834	0.0782465	0.619118	0.0780012	0.599871	0.0777305	0.614767	0.078349	0.607174	0.0781076	0.605713	0.0786325	0.617936	0.0785591	0.592731	0.0792015	0.606457	0.0783566	0.614584	0.0787884	0.602904	0.0786838	0.615229	0.0791618
		0.622962	0.0790374	0.653035	0.0823853			0.52737	0.0738857	0.575218	0.0742459	0.571419	0.0745007	0.613338	0.077437	0.60806	0.0770407	0.611309	0.0771902	0.610106	0.0769816	0.619472	0.0778959	0.617568	0.077739	0.620369	0.0782127	0.6224	0.0780176	0.60737	0.0776266	0.61949	0.078291	0.612168	0.078067	0.610064	0.0785778	0.622113	0.0785189	0.593354	0.0788742	0.611689	0.0783028	0.619253	0.0787336	0.603408	0.0783512	0.620133	0.0791009
		0.626108	0.07907	0.664301	0.0835439			0.52961	0.0735226	0.582139	0.0742557	0.582298	0.0744397	0.616892	0.0775366	0.613777	0.077098	0.616983	0.0772326	0.615902	0.0770692	0.622646	0.0779681	0.622023	0.077781	0.62436	0.0782339	0.626102	0.0780999	0.615837	0.0776168	0.624823	0.0782984	0.617805	0.0781085	0.614976	0.0785841	0.626828	0.0785436	0.595195	0.0785801	0.617595	0.0783297	0.624523	0.078746	0.604872	0.0780724	0.625669	0.0791085
		0.625198	0.0791677	0.675643	0.0847037			0.533271	0.0732094	0.589547	0.0743518	0.593945	0.074461	0.620695	0.0776989	0.619895	0.07724	0.623057	0.0773553	0.622104	0.0772485	0.626042	0.078094	0.626791	0.077888	0.628631	0.0783091	0.630063	0.0782444	0.624901	0.0777013	0.630531	0.0783709	0.623838	0.0782303	0.620233	0.0786514	0.631875	0.078632	0.598201	0.0783272	0.623916	0.0784361	0.630164	0.078825	0.607257	0.077855	0.631594	0.0791843
		0.627726	0.0791971	0.687063	0.0858648			0.538253	0.0729547	0.597119	0.0745299	0.605852	0.0745636	0.62458	0.0779165	0.626147	0.0774606	0.629263	0.0775529	0.628441	0.0775117	0.629512	0.0782681	0.631663	0.0780554	0.632996	0.078435	0.63411	0.0784449	0.634166	0.0778766	0.636365	0.0785053	0.630004	0.0784271	0.625607	0.0787766	0.637033	0.0787802	0.602293	0.0781225	0.630377	0.0786175	0.63593	0.0789672	0.610497	0.0777049	0.637651	0.0793249
		0.637821	0.0792478	0.698561	0.0870271			0.544419	0.0727653	0.604524	0.0747822	0.617498	0.0747431	0.628377	0.0781801	0.632261	0.0777501	0.635332	0.0778168	0.634637	0.0778473	0.632903	0.0784829	0.636427	0.0782759	0.637264	0.0786061	0.638066	0.0786926	0.643226	0.0781349	0.64207	0.0786958	0.636033	0.0786902	0.630862	0.0789542	0.642076	0.0789818	0.607357	0.0779715	0.636695	0.0788659	0.641568	0.0791664	0.614504	0.0776263	0.643574	0.0795241
		0.629182	0.0792695	0.710137	0.0881907			0.551602	0.0726464	0.611438	0.0750977	0.628374	0.0749916	0.63192	0.0784782	0.637967	0.0780959	0.640998	0.0781355	0.64042	0.0782406	0.636069	0.0787288	0.640874	0.0785398	0.641249	0.0788149	0.641758	0.0789766	0.651687	0.078465	0.647397	0.078934	0.641661	0.0790082	0.635769	0.0791766	0.646785	0.0792281	0.613256	0.0778784	0.642593	0.0791704	0.646832	0.0794138	0.61917	0.0776211	0.649104	0.0797733
		0.633288	0.0793903	0.721792	0.0893555			0.559605	0.0726014	0.617558	0.0754625	0.638005	0.0752983	0.635055	0.0787976	0.643018	0.0784828	0.646013	0.078495	0.645538	0.0786744	0.63887	0.0789952	0.64481	0.0788356	0.644777	0.0790522	0.645025	0.0792846	0.659177	0.0788525	0.652113	0.0792095	0.646643	0.0793672	0.640112	0.0794339	0.650953	0.0795081	0.619829	0.0778456	0.647814	0.0795177	0.651492	0.0796987	0.624366	0.0776897	0.653999	0.0800616
		0.632393	0.079401	0.733526	0.0905215			0.56821	0.0726313	0.622619	0.0758608	0.64597	0.0756498	0.637644	0.0791244	0.647193	0.0788939	0.650158	0.0788797	0.649767	0.0791298	0.641183	0.0792704	0.648063	0.0791503	0.647693	0.0793079	0.647724	0.079603	0.665371	0.0792803	0.656012	0.0795102	0.65076	0.0797514	0.643704	0.079715	0.654398	0.0798097	0.626897	0.0778742	0.65213	0.0798927	0.655345	0.0800086	0.629951	0.0778301	0.658047	0.0803764
		0.630782	0.0794692	0.74534	0.0916888			0.577183	0.0727355	0.626397	0.0762752	0.65192	0.0760306	0.639575	0.0794444	0.650308	0.0793113	0.653252	0.0792727	0.652923	0.0795868	0.642909	0.0795425	0.650491	0.0794703	0.64987	0.0795705	0.649737	0.079918	0.669996	0.0797299	0.658924	0.0798231	0.653834	0.0801441	0.646385	0.0800075	0.65697	0.0801197	0.634266	0.0779632	0.655352	0.0802789	0.658222	0.0803299	0.635772	0.0780386	0.661069	0.0807039
		0.632028	0.0795245	0.757235	0.0928574			0.586278	0.0729111	0.628728	0.0766875	0.655597	0.0764242	0.640763	0.0797436	0.652228	0.0797168	0.65516	0.0796568	0.654866	0.0800255	0.643971	0.0797994	0.651988	0.0797814	0.651212	0.0798288	0.650976	0.0802159	0.672851	0.0801815	0.66072	0.0801344	0.655729	0.0805282	0.64804	0.0802987	0.658557	0.0804245	0.641736	0.0781103	0.657339	0.0806595	0.659997	0.0806487	0.641672	0.0783093	0.662934	0.0810298
		0.639738	0.0795738	0.769211	0.0940271			0.595249	0.0731532	0.629511	0.0770797	0.656838	0.0768134	0.641155	0.0800088	0.652869	0.0800925	0.655798	0.0800153	0.655513	0.0804267	0.644323	0.08003	0.652488	0.0800702	0.651662	0.0800713	0.651387	0.0804835	0.673812	0.0806154	0.661324	0.0804306	0.656362	0.0808868	0.648595	0.0805758	0.659088	0.0807109	0.649104	0.0783115	0.658005	0.0810178	0.660592	0.0809509	0.647488	0.0786349	0.66356	0.0813398
		0.642693	0.0797382	0.781269	0.0951982			0.603849	0.0734553	Black	Black	Black	Black	Black	Black	Black	Black	Black	Black	Black	Black	Black	Black	Black	Black	Black	Black	Black	Black	Black	Black	Black	Black	Black	Black	Black	Black	Black	Black	0.656167	0.0785612	Black	Black	Black	Black	0.653062	0.0790066	Black	Black
		0.629496	0.079777	0.793408	0.0963705			0.611844	0.0738091					0.628852	0.0750092																					0.64884	0.0770097			0.662733	0.0788528					0.658242	0.0794143
		0.633417	0.0797877	0.805631	0.097544			0.619017	0.074205					0.635689	0.0753069																					0.657653	0.0773003			0.668624	0.0791781					0.662888	0.0798467
		0.62687	0.0799456	0.817937	0.0987189			0.625171	0.0746321					0.641557	0.0756327																					0.665217	0.0776234			0.673679	0.0795283					0.666871	0.0802921
		0.622891	0.079977	0.830326	0.0998949			0.630139	0.0750789					0.646294	0.0759777																					0.671325	0.0779703			0.677759	0.079894					0.670084	0.0807383
		0.634417	0.0800017	0.831439	0.1			0.633785	0.0755332					0.649772	0.0763324																					0.67581	0.0783313			0.680753	0.080265					0.672439	0.0811732
		0.646481	0.0800862	IsoLine	IsoLine			0.63601	0.0759824					0.651895	0.0766872																					0.678549	0.0786967			0.682581	0.0806314					0.673871	0.0815849
		0.637961	0.0800923					0.636753	0.0764145					0.652607	0.0770325																					0.679469	0.0790566			0.683191	0.080983					0.674342	0.0819622
		0.627101	0.0801503					Black	Black					Black	Black																					Black	Black			Black	Black					Black	Black
		0.640682	0.080191
		0.633013	0.0802707
		0.638623	0.080323
		0.63459	0.0806674
		0.634952	0.0807185
		0.640623	0.0808374
		0.642377	0.0808417
		0.639938	0.0808572
		0.643597	0.0814712
		0.660456	0.081517
		0.635439	0.0816423
		0.655382	0.0817115
		0.636427	0.0818785
		0.641634	0.0819878
		0.649235	0.0820133
		0.661238	0.0821688
		0.665545	0.0821987
		0.67275	0.082584
		0.654899	0.0827196
		0.656098	0.0827439
		0.66326	0.0827905
		0.668304	0.0828088
		0.672385	0.0831603
		0.683158	0.0837021
		0.662117	0.0840563
		0.678964	0.084135
		0.669403	0.0844559
		0.663572	0.0845353
		0.673106	0.0846026
		0.680611	0.0849162
		0.686454	0.085001
		0.694278	0.0850503
		0.681117	0.0851184
		0.681803	0.0853212
		0.688074	0.0853329
		0.683051	0.0856996
		0.687706	0.0857646
		0.690431	0.0859556
		0.6775	0.0863326
		0.697058	0.0864384
		0.690099	0.0866838
		0.696575	0.0869178
		0.719346	0.0872861
		0.70896	0.0876569
		0.709831	0.0887988
		0.703534	0.0890118
		0.713761	0.0902082
		0.730591	0.0904427
		0.747709	0.0906327
		0.75639	0.0908241
		0.80183	0.0958846
		0.798624	0.0960697
		0.801801	0.0961914
		0.824327	0.0983084
		0.830137	0.0984533
		0.852228	0.101314
		0.896972	0.106306
		4.85395	0.314509
		6.49988	0.358039
		14.4627	0.524013
		IsoLine	IsoLine
				0.647635	0.07998	0.618376	0.0782038	0.633812	0.0788229	0.620234	0.0784223
				0.647062	0.0802787	0.62026	0.0782784	0.633256	0.0790109	IsoLine	IsoLine
				0.645405	0.080505	0.618796	0.0782788	0.631645	0.0791512
				0.642736	0.0806487	0.61183	0.0784918	0.62911	0.0792324
				0.639171	0.0807037	0.617646	0.0785417	0.625855	0.079248
				0.634867	0.0806676	0.622076	0.0785679	0.622146	0.0791967
				0.630011	0.0805419	0.622245	0.0786182	0.618281	0.0790827
				0.624815	0.0803321	IsoLine	IsoLine	0.614575	0.0789152
				0.619507	0.0800474			0.611327	0.0787077
				0.614319	0.0797003			0.608801	0.0784771
				0.609477	0.0793058			0.607201	0.0782421
				0.605194	0.0788813			0.606657	0.0780217
				0.601655	0.0784454			0.607213	0.0778337
				0.599017	0.0780169			0.608824	0.0776934
				0.597393	0.0776148			0.611359	0.0776122
				0.596856	0.0772565			0.614614	0.0775966
				0.597429	0.0769577			0.618323	0.0776479
				0.599086	0.0767315			0.622188	0.0777619
				0.601755	0.0765877			0.625894	0.0779295
				0.60532	0.0765327			0.629142	0.0781369
				0.609624	0.0765689			0.631668	0.0783675
				0.61448	0.0766946			0.633268	0.0786025
				0.619676	0.0769044			0.633812	0.0788229
				0.624984	0.077189
				0.630172	0.0775362
				0.635013	0.0779306
				0.639297	0.0783551
				0.642836	0.0787911
				0.645474	0.0792195
				0.647097	0.0796217
				0.647635	0.07998
				Black	Black
[truncated: 206 more columns]

## Sheet: PlotDat5
Source sheet	all data	0.581682	0.0753517	0.558806	0.0723004	0.574259	0.0739651	0.589866	0.0756324	0.605627	0.0773023	0.621545	0.0789747	0.554888	0.072	0.556079	0.072	0.553704	0.072	0.557657	0.0723004	0.636753	0.0764145	0.629511	0.0770797	0.656838	0.0768134	0.652607	0.0770325	0.624056	0.0783533	0.614693	0.0768959
Plot name	Concordia2	0.593291	0.0762279	0.558759	0.072328	0.574211	0.0739934	0.589816	0.0756613	0.605576	0.0773318	0.621492	0.079005	0.554888	0.072	0.557421	0.0721454	0.554888	0.072129	0.573073	0.0739651	0.636514	0.0766441	0.629353	0.0772418	0.656594	0.0769792	0.65238	0.0772177	0.623822	0.0785402	0.614509	0.0770316
Plot Type	1	0.599883	0.0763224	0.558623	0.0723534	0.574071	0.0740194	0.589672	0.0756879	0.605427	0.077359	0.621338	0.0790328	0.557421	0.0722749	0.559958	0.0724198	0.557421	0.0724044	0.588642	0.0756324	0.635807	0.0768626	0.628887	0.0773954	0.655866	0.0771394	0.651708	0.0773954	0.623153	0.0786959	0.613966	0.0771535
1st free col	35	0.600123	0.0763355	0.558409	0.0723745	0.57385	0.0740409	0.589443	0.07571	0.605192	0.0773816	0.621096	0.0790559	0.559958	0.0725498	0.562499	0.0726943	0.559958	0.0726798	0.604365	0.0773023	0.634638	0.0770682	0.628117	0.0775389	0.65466	0.0772927	0.650596	0.077564	0.62206	0.0788171	0.613077	0.0772592
Sigma Level	2	0.601403	0.0769303	0.558134	0.0723896	0.573566	0.0740564	0.58915	0.0757258	0.604889	0.0773978	0.620784	0.0790724	0.562499	0.0728248	0.565045	0.0729689	0.562499	0.0729553	0.620244	0.0789747	0.633017	0.0772592	0.62705	0.0776713	0.652986	0.0774377	0.649053	0.0777222	0.620565	0.0789016	0.611858	0.0773466
Absolute Errs	FALSE	IsoLine	IsoLine	0.55782	0.0723974	0.573242	0.0740644	0.588816	0.075734	0.604545	0.0774062	0.620429	0.079081	0.565045	0.0730999	0.567594	0.0732435	0.565045	0.0732309	IsoLine	IsoLine	0.630958	0.077434	0.625695	0.0777913	0.65086	0.0775732	0.647092	0.0778685	0.618698	0.0789478	0.610333	0.0774141
Symbol Type	1			0.557493	0.0723974	0.572904	0.0740644	0.588468	0.075734	0.604185	0.0774062	0.620058	0.079081	0.567594	0.0733751	0.570148	0.0735183	0.567594	0.0735066			0.628479	0.0775909	0.624064	0.077898	0.648299	0.077698	0.644731	0.0780018	0.616493	0.0789547	0.608532	0.0774602
Inverse Plot	FALSE			0.557179	0.0723896	0.57258	0.0740564	0.588133	0.0757258	0.603841	0.0773978	0.619703	0.0790724	0.570148	0.0736503	0.572706	0.0737931	0.570148	0.0737823			0.6256	0.0777288	0.62217	0.0779905	0.645325	0.0778111	0.64199	0.0781208	0.613995	0.0789222	0.60649	0.0774842
Color Plot	FALSE			0.556904	0.0723745	0.572296	0.0740409	0.58784	0.07571	0.603538	0.0773816	0.619391	0.0790559	0.572706	0.0739256	0.575268	0.0740679	0.572706	0.0740581			0.622347	0.0778463	0.62003	0.0780679	0.641963	0.0779114	0.638891	0.0782246	0.611252	0.0788509	0.604247	0.0774856
3D plot	FALSE			0.55669	0.0723534	0.572075	0.0740194	0.587612	0.0756879	0.603303	0.077359	0.619149	0.0790328	0.575268	0.074201	0.577834	0.0743428	0.575268	0.074334			0.618747	0.0779426	0.617661	0.0781296	0.638242	0.0779982	0.635461	0.0783123	0.608317	0.0787422	0.601845	0.0774642
Linear	FALSE			0.556554	0.072328	0.571935	0.0739934	0.587468	0.0756613	0.603154	0.0773318	0.618995	0.079005	0.577834	0.0744764	0.580404	0.0746178	0.577834	0.07461			0.614831	0.0780168	0.615085	0.0781751	0.634194	0.0780708	0.63173	0.0783832	0.605247	0.0785983	0.599333	0.0774206
Data Range	AA3:AE9			0.556508	0.0723004	0.571887	0.0739651	0.587418	0.0756324	0.603103	0.0773023	0.618942	0.0789747	0.580404	0.0747519	0.582978	0.0748929	0.580404	0.074886			0.610632	0.0780682	0.612323	0.078204	0.629853	0.0781284	0.627729	0.0784365	0.602103	0.0784219	0.596759	0.0773557
Filled Symbols	FALSE			0.556554	0.0722728	0.571935	0.0739368	0.587468	0.0756034	0.603154	0.0772727	0.618995	0.0789445	0.582978	0.0750275	0.585557	0.075168	0.582978	0.0751621			0.606185	0.0780965	0.609398	0.078216	0.625256	0.0781705	0.623493	0.0784719	0.598945	0.0782165	0.594172	0.0772705
ConcAge	TRUE			0.55669	0.0722474	0.572075	0.0739108	0.587612	0.0755769	0.603303	0.0772455	0.619149	0.0789166	0.585557	0.0753031	0.58814	0.0754432	0.585557	0.0754382			0.60153	0.0781014	0.606336	0.0782111	0.620443	0.078197	0.619057	0.0784892	0.595835	0.077986	0.591624	0.0771669
ConcSwap	FALSE			0.556904	0.0722263	0.572296	0.0738893	0.58784	0.0755548	0.603538	0.0772229	0.619391	0.0788935	0.58814	0.0755789	0.590727	0.0757185	0.58814	0.0757145			0.596706	0.0780827	0.603163	0.0781892	0.615454	0.0782074	0.61446	0.078488	0.592833	0.077735	0.589164	0.0770468
1st Symbol-row	1			0.557179	0.0722112	0.57258	0.0738738	0.588133	0.075539	0.603841	0.0772067	0.619703	0.078877	0.590727	0.0758546	0.593318	0.0759939	0.590727	0.0759908			0.591753	0.0780408	0.599905	0.0781507	0.610333	0.0782018	0.60974	0.0784685	0.589998	0.0774683	0.58684	0.0769126
				0.557493	0.0722034	0.572904	0.0738658	0.588468	0.0755307	0.604185	0.0771983	0.620058	0.0788684	0.593318	0.0761305	0.595914	0.0762693	0.593318	0.0762671			0.586714	0.077976	0.596591	0.0780957	0.605122	0.0781801	0.604939	0.0784307	0.587385	0.0771912	0.584697	0.0767669
				0.55782	0.0722034	0.573242	0.0738658	0.588816	0.0755307	0.604545	0.0771983	0.620429	0.0788684	0.595914	0.0764064	0.598514	0.0765448	0.595914	0.0765436			0.581633	0.0778887	0.593249	0.0780247	0.599867	0.0781425	0.600096	0.0783751	0.585045	0.076909	0.582777	0.0766124
				0.558134	0.0722112	0.573566	0.0738738	0.58915	0.075539	0.604889	0.0772067	0.620784	0.078877	0.598514	0.0766824	0.601118	0.0768203	0.598514	0.0768201			0.576552	0.0777798	0.589907	0.0779385	0.594612	0.0780895	0.595254	0.0783021	0.583023	0.0766272	0.581116	0.0764524
				0.558409	0.0722263	0.57385	0.0738893	0.589443	0.0755548	0.605192	0.0772229	0.621096	0.0788935	0.601118	0.0769585	0.603726	0.077096	0.601118	0.0770967			0.571514	0.0776502	0.586594	0.0778376	0.589402	0.0780213	0.590453	0.0782123	0.581359	0.0763513	0.579749	0.0762897
				0.558623	0.0722474	0.574071	0.0739108	0.589672	0.0755769	0.605427	0.0772455	0.621338	0.0789166	0.603726	0.0772347	0.606338	0.0773717	0.603726	0.0773733			0.566564	0.077501	0.583338	0.077723	0.584281	0.0779387	0.585734	0.0781065	0.580085	0.0760866	0.5787	0.0761277
				0.558759	0.0722728	0.574211	0.0739368	0.589816	0.0756034	0.605576	0.0772727	0.621492	0.0789445	0.606338	0.0775109	0.608955	0.0776474	0.606338	0.0776501			0.561742	0.0773335	0.580167	0.0775957	0.579294	0.0778423	0.581139	0.0779856	0.579226	0.0758384	0.577991	0.0759694
				0.558806	0.0723004	0.574259	0.0739651	0.589866	0.0756324	0.605627	0.0773023	0.621545	0.0789747	0.608955	0.0777872	0.611576	0.0779233	0.608955	0.0779269			0.557091	0.077149	0.577109	0.0774567	0.574482	0.0777329	0.576705	0.0778506	0.578799	0.0756114	0.577635	0.0758179
				ConcTikEll	ConcTikEll	ConcTikEll	ConcTikEll	ConcTikEll	ConcTikEll	ConcTikEll	ConcTikEll	ConcTikEll	ConcTikEll	0.611576	0.0780635	0.614201	0.0781992	0.611576	0.0782037			0.552649	0.0769492	0.574188	0.0773072	0.569886	0.0776115	0.572471	0.0777027	0.578812	0.0754102	0.577639	0.0756763
														0.614201	0.0783399	0.616831	0.0784752	0.614201	0.0784807			0.548455	0.0767358	0.57143	0.0771485	0.565547	0.0774791	0.568473	0.0775431	0.579264	0.0752385	0.578004	0.0755471
														0.616831	0.0786164	0.619465	0.0787512	0.616831	0.0787577			0.544544	0.0765105	0.568858	0.0769819	0.561501	0.0773368	0.564745	0.0773733	0.580147	0.0750997	0.578722	0.0754331
														0.619465	0.078893	0.622103	0.0790274	0.619465	0.0790348			0.540951	0.0762754	0.566496	0.0768089	0.557782	0.0771858	0.561319	0.0771945	0.581444	0.0749965	0.579778	0.0753363
														0.622103	0.0791697	0.624745	0.0793036	0.622103	0.0793119			0.537704	0.0760324	0.564361	0.076631	0.554422	0.0770275	0.558224	0.0770085	0.58313	0.074931	0.581153	0.0752587
														0.624745	0.0794464	0.627392	0.0795798	0.624745	0.0795892			0.534833	0.0757836	0.562474	0.0764496	0.55145	0.0768632	0.555486	0.0768167	0.585171	0.0749044	0.58282	0.0752017
														0.627392	0.0797231	0.630043	0.0798562	0.627392	0.0798665			0.532362	0.0755311	0.560849	0.0762663	0.548892	0.0766943	0.55313	0.0766207	0.587528	0.0749173	0.584747	0.0751666
														0.630043	0.08	0.631425	0.08	0.628668	0.08			0.530312	0.0752771	0.559501	0.0760827	0.546768	0.0765221	0.551174	0.0764224	0.590155	0.0749693	0.586895	0.0751539
														0.630043	0.08	ConcBand	ConcBand	ConcBand	ConcBand			0.528699	0.0750237	0.558442	0.0759003	0.545098	0.0763483	0.549636	0.0762233	0.593001	0.0750595	0.589223	0.0751639
														IsoLine	IsoLine							0.527539	0.0747731	0.55768	0.0757208	0.543895	0.0761743	0.548528	0.0760252	0.596011	0.0751861	0.591685	0.0751964
																						0.526841	0.0745275	0.557222	0.0755455	0.543169	0.0760015	0.547861	0.0758297	0.599125	0.0753466	0.594235	0.0752509
																						0.52661	0.0742888	0.557071	0.0753761	0.542928	0.0758315	0.547639	0.0756385	0.602284	0.075538	0.596822	0.0753261
																						0.52685	0.0740593	0.557229	0.0752139	0.543172	0.0756657	0.547866	0.0754533	0.605426	0.0757565	0.599395	0.0754207
																						0.527557	0.0738407	0.557695	0.0750604	0.5439	0.0755054	0.548538	0.0752756	0.608489	0.0759978	0.601905	0.0755328
																						0.528726	0.0736351	0.558465	0.0749169	0.545106	0.0753521	0.54965	0.075107	0.611415	0.0762573	0.604303	0.0756603
																						0.530347	0.0734441	0.559532	0.0747845	0.546779	0.0752072	0.551193	0.0749488	0.614145	0.0765299	0.606542	0.0758006
																						0.532406	0.0732694	0.560887	0.0746645	0.548906	0.0750717	0.553154	0.0748025	0.616628	0.0768102	0.608579	0.0759511
																						0.534885	0.0731124	0.562518	0.0745577	0.551467	0.0749469	0.555515	0.0746692	0.618814	0.0770929	0.610374	0.0761087
																						0.537763	0.0729746	0.564412	0.0744653	0.554441	0.0748338	0.558257	0.0745502	0.620661	0.0773725	0.611891	0.0762705
																						0.541017	0.072857	0.566553	0.0743879	0.557803	0.0747334	0.561355	0.0744464	0.622134	0.0776434	0.613102	0.0764332
																						0.544617	0.0727607	0.568921	0.0743261	0.561524	0.0746466	0.564785	0.0743587	0.623203	0.0779005	0.613984	0.0765938
																						0.548533	0.0726866	0.571497	0.0742806	0.565572	0.0745741	0.568516	0.0742878	0.623848	0.0781386	0.614517	0.076749
																						0.552732	0.0726351	0.57426	0.0742517	0.569913	0.0745165	0.572517	0.0742345	0.624056	0.0783533	0.614693	0.0768959
																						0.557178	0.0726069	0.577184	0.0742397	0.57451	0.0744743	0.576753	0.074199	Black	Black
																						0.561833	0.072602	0.580246	0.0742447	0.579323	0.0744479	0.581189	0.0741818
																						0.566658	0.0726206	0.58342	0.0742665	0.584311	0.0744375	0.585786	0.074183
																						0.571611	0.0726625	0.586677	0.0743051	0.589433	0.0744431	0.590506	0.0742025
																						0.576649	0.0727274	0.589991	0.0743601	0.594643	0.0744648	0.595307	0.0742403
																						0.581731	0.0728146	0.593333	0.074431	0.599899	0.0745023	0.60015	0.0742959
																						0.586812	0.0729235	0.596675	0.0745173	0.605154	0.0745554	0.604993	0.0743689
																						0.591849	0.0730531	0.599988	0.0746181	0.610364	0.0746235	0.609794	0.0744587
																						0.5968	0.0732023	0.603244	0.0747327	0.615485	0.0747061	0.614512	0.0745645
																						0.601622	0.0733699	0.606415	0.0748601	0.620472	0.0748026	0.619108	0.0746854
																						0.606273	0.0735544	0.609474	0.0749991	0.625284	0.074912	0.623541	0.0748204
																						0.610715	0.0737542	0.612394	0.0751486	0.629879	0.0750334	0.627775	0.0749683
																						0.614909	0.0739676	0.615152	0.0753073	0.634219	0.0751658	0.631773	0.0751279
																						0.618819	0.0741928	0.617724	0.0754738	0.638265	0.0753081	0.635501	0.0752977
																						0.622413	0.0744279	0.620087	0.0756468	0.641984	0.075459	0.638927	0.0754765
																						0.625659	0.0746709	0.622221	0.0758248	0.645344	0.0756173	0.642022	0.0756625
																						0.62853	0.0749197	0.624108	0.0760062	0.648315	0.0757817	0.64476	0.0758543
																						0.631002	0.0751722	0.625733	0.0761895	0.650874	0.0759506	0.647117	0.0760502
																						0.633052	0.0754263	0.627081	0.0763731	0.652998	0.0761227	0.649072	0.0762486
																						0.634664	0.0756797	0.62814	0.0765554	0.654668	0.0762965	0.650611	0.0764477
																						0.635825	0.0759302	0.628902	0.076735	0.655871	0.0764706	0.651718	0.0766458
																						0.636523	0.0761759	0.629361	0.0769103	0.656597	0.0766433	0.652385	0.0768413
																						0.636753	0.0764145	0.629511	0.0770797	0.656838	0.0768134	0.652607	0.0770325
																						Black	Black	Black	Black	Black	Black	Black	Black

## Sheet: PlotDat11
Source sheet	all data	0.606781	0.0772877	0.589866	0.0756324	0.597727	0.076467	0.605627	0.0773023	0.613567	0.0781382	0.621545	0.0789747	0.629563	0.0798119	0.637621	0.0806498	0.587401	0.0755	0.588673	0.0755	0.586135	0.0755	0.588642	0.0756324	0.620876	0.0781093	0.640431	0.0793463	0.647893	0.0792877	0.646413	0.0790011	0.625595	0.0784492
Plot name	Concordia7	0.618376	0.0782038	0.589816	0.0756613	0.597677	0.0764963	0.605576	0.0773318	0.613515	0.0781681	0.621492	0.079005	0.629509	0.0798425	0.637566	0.0806807	0.587401	0.0755	0.589175	0.0755534	0.587401	0.0756355	0.596484	0.076467	0.620732	0.0782253	0.64033	0.0794676	0.64777	0.079429	0.646292	0.0791283	0.625471	0.0785484
Plot Type	1	0.62026	0.0782784	0.589672	0.0756879	0.59753	0.0765231	0.605427	0.077359	0.613363	0.0781956	0.621338	0.0790328	0.629353	0.0798706	0.637408	0.0807091	0.589175	0.0756892	0.59095	0.0757422	0.589175	0.075825	0.604365	0.0773023	0.620316	0.0783231	0.640042	0.0795781	0.647412	0.0795604	0.645936	0.0792483	0.625109	0.0786342
1st free col	37	0.618796	0.0782788	0.589443	0.07571	0.597298	0.0765455	0.605192	0.0773816	0.613124	0.0782184	0.621096	0.0790559	0.629107	0.079894	0.637158	0.0807327	0.59095	0.0758784	0.592728	0.0759311	0.59095	0.0760146	0.612285	0.0781382	0.619636	0.0784007	0.639569	0.0796768	0.646823	0.0796809	0.645349	0.0793601	0.624518	0.078705
Sigma Level	2	IsoLine	IsoLine	0.58915	0.0757258	0.597	0.0765615	0.604889	0.0773978	0.612817	0.0782348	0.620784	0.0790724	0.628791	0.0799107	0.636837	0.0807496	0.592728	0.0760677	0.594507	0.0761201	0.592728	0.0762042	0.620244	0.0789747	0.618707	0.0784567	0.638916	0.079763	0.646006	0.0797895	0.644535	0.0794626	0.623708	0.0787594
Absolute Errs	FALSE			0.588816	0.075734	0.596661	0.0765698	0.604545	0.0774062	0.612467	0.0782433	0.620429	0.079081	0.62843	0.0799194	0.63647	0.0807584	0.594507	0.076257	0.596289	0.0763091	0.594507	0.0763938	0.628242	0.0798119	0.617545	0.0784899	0.638087	0.0798359	0.644971	0.0798852	0.643501	0.079555	0.622696	0.0787963
Symbol Type	1			0.588468	0.075734	0.596307	0.0765698	0.604185	0.0774062	0.612102	0.0782433	0.620058	0.079081	0.628054	0.0799194	0.636089	0.0807584	0.596289	0.0764463	0.598073	0.0764981	0.596289	0.0765835	0.636279	0.0806498	0.616174	0.0784997	0.63709	0.0798949	0.643724	0.0799671	0.642257	0.0796365	0.621501	0.0788151
Inverse Plot	FALSE			0.588133	0.0757258	0.595968	0.0765615	0.603841	0.0773978	0.611752	0.0782348	0.619703	0.0790724	0.627693	0.0799107	0.635722	0.0807496	0.598073	0.0766356	0.599858	0.0766871	0.598073	0.0767732	IsoLine	IsoLine	0.61462	0.0784859	0.635933	0.0799394	0.642277	0.0800347	0.640813	0.0797064	0.620146	0.0788153
Color Plot	FALSE			0.58784	0.07571	0.59567	0.0765455	0.603538	0.0773816	0.611445	0.0782184	0.619391	0.0790559	0.627377	0.079894	0.635401	0.0807327	0.599858	0.076825	0.601646	0.0768762	0.599858	0.0769629			0.612913	0.0784488	0.634627	0.0799692	0.640642	0.0800873	0.639181	0.0797642	0.618658	0.0787969
3D plot	FALSE			0.587612	0.0756879	0.595438	0.0765231	0.603303	0.077359	0.611206	0.0781956	0.619149	0.0790328	0.62713	0.0798706	0.635151	0.0807091	0.601646	0.0770144	0.603435	0.0770653	0.601646	0.0771527			0.611087	0.0783891	0.633182	0.0799838	0.638834	0.0801244	0.637374	0.0798093	0.617066	0.0787603
Linear	FALSE			0.587468	0.0756613	0.595291	0.0764963	0.603154	0.0773318	0.611055	0.0781681	0.618995	0.079005	0.626974	0.0798425	0.634993	0.0806807	0.603435	0.0772039	0.605227	0.0772544	0.603435	0.0773425			0.609178	0.0783079	0.63161	0.0799833	0.636867	0.0801458	0.63541	0.0798413	0.6154	0.0787063
Data Range	AA11:AE15			0.587418	0.0756324	0.595241	0.076467	0.603103	0.0773023	0.611003	0.0781382	0.618942	0.0789747	0.626921	0.0798119	0.634938	0.0806498	0.605227	0.0773934	0.60702	0.0774436	0.605227	0.0775324			0.607221	0.078207	0.629926	0.0799676	0.634758	0.0801512	0.633303	0.07986	0.613694	0.0786358
Filled Symbols	FALSE			0.587468	0.0756034	0.595291	0.0764377	0.603154	0.0772727	0.611055	0.0781082	0.618995	0.0789445	0.626974	0.0797813	0.634993	0.0806188	0.60702	0.0775829	0.608816	0.0776328	0.60702	0.0777222			0.605256	0.0780881	0.628143	0.0799369	0.632525	0.0801407	0.631073	0.0798652	0.61198	0.0785503
ConcAge	TRUE			0.587612	0.0755769	0.595438	0.0764108	0.603303	0.0772455	0.611206	0.0780807	0.619149	0.0789166	0.62713	0.0797532	0.635151	0.0805904	0.608816	0.0777725	0.610613	0.077822	0.608816	0.0779121			0.603321	0.0779536	0.626277	0.0798914	0.630188	0.0801143	0.628738	0.0798568	0.610292	0.0784513
ConcSwap	FALSE			0.58784	0.0755548	0.59567	0.0763885	0.603538	0.0772229	0.611445	0.0780579	0.619391	0.0788935	0.627377	0.0797299	0.635401	0.0805668	0.610613	0.077962	0.612413	0.0780113	0.610613	0.0781021			0.601453	0.0778062	0.624343	0.0798314	0.627767	0.0800722	0.626318	0.079835	0.608662	0.0783409
1st Symbol-row	1			0.588133	0.075539	0.595968	0.0763725	0.603841	0.0772067	0.611752	0.0780415	0.619703	0.078877	0.627693	0.0797131	0.635722	0.0805499	0.612413	0.0781517	0.614215	0.0782006	0.612413	0.0782921			0.599689	0.0776486	0.622359	0.0797576	0.625281	0.0800149	0.623834	0.0797999	0.607123	0.0782212
				0.588468	0.0755307	0.596307	0.0763642	0.604185	0.0771983	0.612102	0.078033	0.620058	0.0788684	0.628054	0.0797044	0.636089	0.0805411	0.614215	0.0783413	0.616018	0.0783899	0.614215	0.0784821			0.598063	0.0774841	0.620341	0.0796705	0.622752	0.0799427	0.621307	0.0797519	0.605703	0.0780944
				0.588816	0.0755307	0.596661	0.0763642	0.604545	0.0771983	0.612467	0.078033	0.620429	0.0788684	0.62843	0.0797044	0.63647	0.0805411	0.616018	0.078531	0.617824	0.0785793	0.616018	0.0786721			0.596606	0.0773157	0.618305	0.079571	0.620202	0.0798563	0.618759	0.0796913	0.604432	0.0779632
				0.58915	0.075539	0.597	0.0763725	0.604889	0.0772067	0.612817	0.0780415	0.620784	0.078877	0.628791	0.0797131	0.636837	0.0805499	0.617824	0.0787207	0.619631	0.0787687	0.617824	0.0788622			0.595348	0.0771468	0.616271	0.0794597	0.617653	0.0797564	0.616211	0.0796186	0.603333	0.07783
				0.589443	0.0755548	0.597298	0.0763885	0.605192	0.0772229	0.613124	0.0780579	0.621096	0.0788935	0.629107	0.0797299	0.637158	0.0805668	0.619631	0.0789105	0.621441	0.0789581	0.619631	0.0790523			0.594312	0.0769806	0.614254	0.0793378	0.615125	0.0796439	0.613685	0.0795345	0.602429	0.0776973
				0.589672	0.0755769	0.59753	0.0764108	0.605427	0.0772455	0.613363	0.0780807	0.621338	0.0789166	0.629353	0.0797532	0.637408	0.0805904	0.621441	0.0791003	0.623253	0.0791476	0.621441	0.0792424			0.593519	0.0768205	0.612272	0.0792061	0.612642	0.0795198	0.611203	0.0794397	0.601736	0.0775679
				0.589816	0.0756034	0.597677	0.0764377	0.605576	0.0772727	0.613515	0.0781082	0.621492	0.0789445	0.629509	0.0797813	0.637566	0.0806188	0.623253	0.0792901	0.625066	0.0793371	0.623253	0.0794326			0.592984	0.0766694	0.610343	0.0790659	0.610223	0.0793851	0.608785	0.0793349	0.601268	0.0774443
				0.589866	0.0756324	0.597727	0.076467	0.605627	0.0773023	0.613567	0.0781382	0.621545	0.0789747	0.629563	0.0798119	0.637621	0.0806498	0.625066	0.07948	0.626882	0.0795266	0.625066	0.0796228			0.592717	0.0765303	0.608482	0.0789184	0.607891	0.079241	0.606453	0.0792212	0.601034	0.0773287
				ConcTikEll	ConcTikEll	ConcTikEll	ConcTikEll	ConcTikEll	ConcTikEll	ConcTikEll	ConcTikEll	ConcTikEll	ConcTikEll	ConcTikEll	ConcTikEll	ConcTikEll	ConcTikEll	0.626882	0.0796698	0.6287	0.0797162	0.626882	0.0798131			0.592725	0.076406	0.606706	0.0787648	0.605663	0.0790886	0.604226	0.0790994	0.601039	0.0772235
																		0.6287	0.0798598	0.63052	0.0799058	0.6287	0.0800033			0.593006	0.0762988	0.605029	0.0786063	0.603561	0.0789293	0.602123	0.0789707	0.601283	0.0771308
																		0.63052	0.0800497	0.632341	0.0800954	0.63052	0.0801936			0.593554	0.0762109	0.603466	0.0784445	0.6016	0.0787645	0.600163	0.078836	0.60176	0.0770523
																		0.632341	0.0802397	0.634165	0.0802851	0.632341	0.080384			0.594361	0.0761439	0.60203	0.0782806	0.599799	0.0785955	0.598362	0.0786965	0.602462	0.0769895
																		0.634165	0.0804297	0.635991	0.0804748	0.634165	0.0805744			0.595409	0.0760993	0.600734	0.078116	0.598173	0.0784239	0.596735	0.0785535	0.603376	0.0769438
																		0.635991	0.0806198	0.637819	0.0806645	0.635991	0.0807648			0.596679	0.0760777	0.599588	0.0779522	0.596735	0.0782509	0.595296	0.0784082	0.604482	0.0769158
																		0.637819	0.0808099	0.639649	0.0808543	0.637819	0.0809552			0.598145	0.0760797	0.598602	0.0777905	0.595497	0.0780782	0.594058	0.0782618	0.60576	0.0769064
																		0.639649	0.081	0.641055	0.081	0.638249	0.081			0.599779	0.0761052	0.597785	0.0776324	0.594471	0.0779073	0.59303	0.0781155	0.607185	0.0769155
																		0.639649	0.081	ConcBand	ConcBand	ConcBand	ConcBand			0.60155	0.0761537	0.597144	0.0774791	0.593665	0.0777395	0.592223	0.0779705	0.608729	0.076943
																		IsoLine	IsoLine							0.603422	0.0762243	0.596684	0.077332	0.593086	0.0775762	0.591642	0.0778283	0.610362	0.0769884
																										0.60536	0.0763156	0.596409	0.0771924	0.592738	0.077419	0.591293	0.0776898	0.612052	0.0770508
																										0.607325	0.0764258	0.596322	0.0770614	0.592626	0.0772691	0.591179	0.0775564	0.613766	0.077129
																										0.60928	0.0765528	0.596422	0.0769401	0.592749	0.0771278	0.5913	0.0774292	0.615471	0.0772215
																										0.611186	0.0766941	0.59671	0.0768296	0.593107	0.0769964	0.591656	0.0773092	0.617134	0.0773264
																										0.613007	0.0768469	0.597183	0.0767308	0.593697	0.0768758	0.592243	0.0771974	0.618723	0.0774418
																										0.614706	0.0770084	0.597837	0.0766446	0.594513	0.0767673	0.593057	0.0770949	0.620206	0.0775653
																										0.616251	0.0771752	0.598665	0.0765717	0.595549	0.0766716	0.594091	0.0770025	0.621554	0.0776946
																										0.617612	0.0773443	0.599662	0.0765128	0.596795	0.0765896	0.595335	0.076921	0.622742	0.0778272
																										0.618762	0.0775122	0.600819	0.0764682	0.598242	0.0765221	0.596779	0.0768511	0.623746	0.0779605
																										0.619679	0.0776758	0.602125	0.0764385	0.599877	0.0764695	0.598412	0.0767933	0.624547	0.0780918
																										0.620344	0.0778318	0.60357	0.0764238	0.601685	0.0764324	0.600218	0.0767483	0.625129	0.0782186
																										0.620746	0.0779773	0.605142	0.0764243	0.603653	0.076411	0.602182	0.0767162	0.625481	0.0783385
																										0.620876	0.0781093	0.606826	0.07644	0.605761	0.0764055	0.604289	0.0766975	0.625595	0.0784492
																										Black	Black	0.608609	0.0764708	0.607994	0.0764161	0.606519	0.0766923
																												0.610475	0.0765163	0.610331	0.0764425	0.608854	0.0767007
																												0.612409	0.0765762	0.612753	0.0764846	0.611274	0.0767225
																												0.614393	0.07665	0.615239	0.0765419	0.613758	0.0767576
																												0.616412	0.0767371	0.617767	0.0766141	0.616285	0.0768056
																												0.618447	0.0768367	0.620317	0.0767005	0.618833	0.0768662
																												0.620482	0.0769479	0.622867	0.0768004	0.621381	0.0769389
																												0.622498	0.0770699	0.625394	0.0769128	0.623907	0.077023
																												0.62448	0.0772015	0.627877	0.077037	0.626389	0.0771178
																												0.626409	0.0773417	0.630296	0.0771717	0.628807	0.0772226
																												0.62827	0.0774893	0.632629	0.0773158	0.631139	0.0773363
																												0.630047	0.0776429	0.634856	0.0774682	0.633366	0.0774581
																												0.631723	0.0778013	0.636959	0.0776274	0.635469	0.0775868
																												0.633286	0.0779632	0.638919	0.0777923	0.637429	0.0777215
																												0.634722	0.0781271	0.64072	0.0779613	0.63923	0.077861
																												0.636019	0.0782917	0.642347	0.0781329	0.640857	0.078004
																												0.637164	0.0784555	0.643785	0.0783059	0.642296	0.0781493
																												0.63815	0.0786172	0.645022	0.0784785	0.643534	0.0782958
																												0.638967	0.0787753	0.646048	0.0786495	0.644562	0.0784421
																												0.639608	0.0789286	0.646854	0.0788173	0.645369	0.078587
																												0.640068	0.0790756	0.647433	0.0789806	0.64595	0.0787292
																												0.640343	0.0792153	0.647781	0.0791378	0.646299	0.0788677
																												0.640431	0.0793463	0.647893	0.0792877	0.646413	0.0790011
																												Black	Black	Black	Black	Black	Black

## Sheet: PlotDat12
Source sheet	all data	0.618376	0.0782038	0.589866	0.0756324	0.597727	0.076467	0.605627	0.0773023	0.613567	0.0781382	0.621545	0.0789747	0.629563	0.0798119	0.637621	0.0806498	0.645718	0.0814883	0.587401	0.0755	0.588673	0.0755	0.586135	0.0755	0.588642	0.0756324	0.640431	0.0793463	0.647893	0.0792877	0.646413	0.0790011	0.679469	0.0790566	0.684388	0.0788894	0.661329	0.0790033	0.647635	0.07998	0.633812	0.0788229
Plot name	Concordia3	0.62026	0.0782784	0.589816	0.0756613	0.597677	0.0764963	0.605576	0.0773318	0.613515	0.0781681	0.621492	0.079005	0.629509	0.0798425	0.637566	0.0806807	0.645663	0.0815195	0.587401	0.0755	0.589336	0.0755705	0.587401	0.0756355	0.596484	0.076467	0.640206	0.0795255	0.647616	0.0794974	0.646139	0.0791906	0.679179	0.0792516	0.684103	0.0790431	0.66116	0.0791309	0.647376	0.0801866	0.633623	0.0789368
Plot Type	1	0.618796	0.0782788	0.589672	0.0756879	0.59753	0.0765231	0.605427	0.077359	0.613363	0.0781956	0.621338	0.0790328	0.629353	0.0798706	0.637408	0.0807091	0.645502	0.0815483	0.589336	0.0757063	0.591272	0.0757765	0.589336	0.0758422	0.604365	0.0773023	0.639557	0.0796789	0.646807	0.0796835	0.645333	0.0793625	0.678314	0.0794401	0.68325	0.0791925	0.660658	0.0792536	0.646628	0.0803628	0.63307	0.0790366
1st free col	45	0.61183	0.0784918	0.589443	0.07571	0.597298	0.0765455	0.605192	0.0773816	0.613124	0.0782184	0.621096	0.0790559	0.629107	0.079894	0.637158	0.0807327	0.645248	0.0815721	0.591272	0.0759127	0.593212	0.0759825	0.591272	0.076049	0.612285	0.0781382	0.638495	0.0798036	0.645481	0.0798422	0.644011	0.0795132	0.676882	0.0796205	0.681838	0.0793363	0.659826	0.0793705	0.645405	0.080505	0.632166	0.0791196
Sigma Level	2	0.617646	0.0785417	0.58915	0.0757258	0.597	0.0765615	0.604889	0.0773978	0.612817	0.0782348	0.620784	0.0790724	0.628791	0.0799107	0.636837	0.0807496	0.644922	0.0815892	0.593212	0.0761191	0.595153	0.0761886	0.593212	0.0762558	0.620244	0.0789747	0.637042	0.0798972	0.643664	0.0799705	0.642197	0.0796398	0.674895	0.0797913	0.679878	0.0794734	0.658673	0.0794805	0.643732	0.0806104	0.630936	0.0791836
Absolute Errs	FALSE	0.622076	0.0785679	0.588816	0.075734	0.596661	0.0765698	0.604545	0.0774062	0.612467	0.0782433	0.620429	0.079081	0.62843	0.0799194	0.63647	0.0807584	0.64455	0.0815981	0.595153	0.0763256	0.597097	0.0763947	0.595153	0.0764626	0.628242	0.0798119	0.635225	0.0799578	0.641391	0.0800658	0.639928	0.07974	0.67237	0.079951	0.677387	0.0796025	0.657207	0.0795828	0.64164	0.0806771	0.629415	0.0792269
Symbol Type	1	0.622245	0.0786182	0.588468	0.075734	0.596307	0.0765698	0.604185	0.0774062	0.612102	0.0782433	0.620058	0.079081	0.628054	0.0799194	0.636089	0.0807584	0.644163	0.0815981	0.597097	0.0765321	0.599044	0.0766009	0.597097	0.0766695	0.636279	0.0806498	0.633081	0.0799843	0.638707	0.0801263	0.637248	0.0798118	0.669328	0.0800982	0.674387	0.0797226	0.655441	0.0796763	0.639171	0.0807037	0.627643	0.0792482
Inverse Plot	FALSE	IsoLine	IsoLine	0.588133	0.0757258	0.595968	0.0765615	0.603841	0.0773978	0.611752	0.0782348	0.619703	0.0790724	0.627693	0.0799107	0.635722	0.0807496	0.643791	0.0815892	0.599044	0.0767386	0.600992	0.0768071	0.599044	0.0768764	0.644357	0.0814883	0.63065	0.0799761	0.635664	0.0801509	0.634209	0.0798537	0.665796	0.0802318	0.670902	0.0798326	0.653391	0.0797605	0.636373	0.0806897	0.625669	0.079247
Color Plot	FALSE			0.58784	0.07571	0.59567	0.0765455	0.603538	0.0773816	0.611445	0.0782184	0.619391	0.0790559	0.627377	0.079894	0.635401	0.0807327	0.643465	0.0815721	0.600992	0.0769452	0.602943	0.0770133	0.600992	0.0770834	IsoLine	IsoLine	0.62798	0.0799334	0.632322	0.080139	0.630869	0.079865	0.661803	0.0803505	0.666963	0.0799316	0.651074	0.0798344	0.633299	0.0806354	0.623547	0.0792233
3D plot	FALSE			0.587612	0.0756879	0.595438	0.0765231	0.603303	0.077359	0.611206	0.0781956	0.619149	0.0790328	0.62713	0.0798706	0.635151	0.0807091	0.643212	0.0815483	0.602943	0.0771518	0.604897	0.0772196	0.602943	0.0772904			0.625124	0.0798571	0.628744	0.0800909	0.627295	0.0798454	0.657385	0.0804533	0.662604	0.0800187	0.648509	0.0798976	0.630011	0.0805419	0.621334	0.0791777
Linear	FALSE			0.587468	0.0756613	0.595291	0.0764963	0.603154	0.0773318	0.611055	0.0781681	0.618995	0.079005	0.626974	0.0798425	0.634993	0.0806807	0.643051	0.0815195	0.604897	0.0773585	0.606853	0.0774259	0.604897	0.0774974			0.622136	0.0797486	0.625001	0.0800076	0.623555	0.0797952	0.652577	0.0805394	0.65786	0.0800933	0.645719	0.0799494	0.626571	0.0804109	0.619092	0.0791115
Data Range	AA13:AE21			0.587418	0.0756324	0.595241	0.076467	0.603103	0.0773023	0.611003	0.0781382	0.618942	0.0789747	0.626921	0.0798119	0.634938	0.0806498	0.642995	0.0814883	0.606853	0.0775652	0.608811	0.0776322	0.606853	0.0777045			0.619075	0.07961	0.621166	0.0798905	0.619723	0.0797156	0.647422	0.0806081	0.652774	0.0801546	0.642727	0.0799894	0.623047	0.080245	0.616881	0.0790266
Filled Symbols	FALSE			0.587468	0.0756034	0.595291	0.0764377	0.603154	0.0772727	0.611055	0.0781082	0.618995	0.0789445	0.626974	0.0797813	0.634993	0.0806188	0.643051	0.081457	0.608811	0.0777719	0.610772	0.0778386	0.608811	0.0779116			0.616	0.079444	0.617314	0.0797421	0.615872	0.079608	0.641963	0.0806587	0.647388	0.0802021	0.639559	0.0800173	0.619507	0.0800474	0.614761	0.0789251
ConcAge	TRUE			0.587612	0.0755769	0.595438	0.0764108	0.603303	0.0772455	0.611206	0.0780807	0.619149	0.0789166	0.62713	0.0797532	0.635151	0.0805904	0.643212	0.0814283	0.610772	0.0779787	0.612735	0.0780451	0.610772	0.0781188			0.612972	0.079254	0.613518	0.0795652	0.612079	0.0794746	0.636247	0.0806908	0.641748	0.0802354	0.636241	0.0800328	0.616021	0.079822	0.61279	0.07881
ConcSwap	FALSE			0.58784	0.0755548	0.59567	0.0763885	0.603538	0.0772229	0.611445	0.0780579	0.619391	0.0788935	0.627377	0.0797299	0.635401	0.0805668	0.643465	0.0814044	0.612735	0.0781855	0.6147	0.0782515	0.612735	0.078326			0.610049	0.0790434	0.609854	0.0793633	0.608416	0.0793178	0.630323	0.0807041	0.635903	0.0802544	0.632803	0.0800358	0.612656	0.0795732	0.611023	0.0786842
1st Symbol-row	1			0.588133	0.075539	0.595968	0.0763725	0.603841	0.0772067	0.611752	0.0780415	0.619703	0.078877	0.627693	0.0797131	0.635722	0.0805499	0.643791	0.0813874	0.6147	0.0783924	0.616668	0.0784581	0.6147	0.0785332			0.607288	0.0788166	0.606393	0.0791402	0.604955	0.0791409	0.624241	0.0806986	0.629902	0.0802587	0.629274	0.0800263	0.609477	0.0793058	0.609507	0.0785513
				0.588468	0.0755307	0.596307	0.0763642	0.604185	0.0771983	0.612102	0.078033	0.620058	0.0788684	0.628054	0.0797044	0.636089	0.0805411	0.644163	0.0813785	0.616668	0.0785993	0.618638	0.0786646	0.616668	0.0787405			0.604742	0.0785778	0.603201	0.0789004	0.601764	0.0789471	0.618053	0.0806742	0.623796	0.0802483	0.625683	0.0800044	0.606547	0.0790251	0.608283	0.0784149
				0.588816	0.0755307	0.596661	0.0763642	0.604545	0.0771983	0.612467	0.078033	0.620429	0.0788684	0.62843	0.0797044	0.63647	0.0805411	0.64455	0.0813785	0.618638	0.0788062	0.62061	0.0788712	0.618638	0.0789478			0.602462	0.0783317	0.600342	0.0786485	0.598904	0.0787404	0.611812	0.0806312	0.617638	0.0802234	0.622061	0.0799702	0.603923	0.0787364	0.607386	0.0782787
				0.58915	0.075539	0.597	0.0763725	0.604889	0.0772067	0.612817	0.0780415	0.620784	0.078877	0.628791	0.0797131	0.636837	0.0805499	0.644922	0.0813874	0.62061	0.0790132	0.622585	0.0790778	0.62061	0.0791552			0.600492	0.0780831	0.59787	0.0783893	0.596432	0.0785246	0.605571	0.08057	0.611479	0.0801842	0.618439	0.079924	0.601655	0.0784454	0.606838	0.0781465
				0.589443	0.0755548	0.597298	0.0763885	0.605192	0.0772229	0.613124	0.0780579	0.621096	0.0788935	0.629107	0.0797299	0.637158	0.0805668	0.645248	0.0814044	0.622585	0.0792202	0.624563	0.0792845	0.622585	0.0793626			0.59887	0.0778369	0.595833	0.078128	0.594394	0.0783041	0.599383	0.080491	0.605374	0.0801309	0.614848	0.0798663	0.599788	0.0781577	0.606657	0.0780217
				0.589672	0.0755769	0.59753	0.0764108	0.605427	0.0772455	0.613363	0.0780807	0.621338	0.0789166	0.629353	0.0797532	0.637408	0.0805904	0.645502	0.0814283	0.624563	0.0794273	0.626543	0.0794912	0.624563	0.07957			0.597627	0.0775978	0.594273	0.0778697	0.592832	0.0780831	0.593302	0.080395	0.599373	0.0800641	0.611319	0.0797975	0.598358	0.0778791	0.606846	0.0779079
				0.589816	0.0756034	0.597677	0.0764377	0.605576	0.0772727	0.613515	0.0781082	0.621492	0.0789445	0.629509	0.0797813	0.637566	0.0806188	0.645663	0.081457	0.626543	0.0796344	0.628525	0.079698	0.626543	0.0797775			0.596789	0.0773706	0.593218	0.0776192	0.591775	0.0778659	0.587379	0.0802827	0.593528	0.0799842	0.607882	0.0797182	0.597393	0.0776148	0.607399	0.0778081
				0.589866	0.0756324	0.597727	0.076467	0.605627	0.0773023	0.613567	0.0781382	0.621545	0.0789747	0.629563	0.0798119	0.637621	0.0806498	0.645718	0.0814883	0.628525	0.0798415	0.63051	0.0799047	0.628525	0.079985			0.59637	0.0771595	0.592689	0.0773816	0.591244	0.0776567	0.581664	0.0801552	0.587889	0.0798921	0.604566	0.0796291	0.596912	0.07737	0.608303	0.077725
				ConcTikEll	ConcTikEll	ConcTikEll	ConcTikEll	ConcTikEll	ConcTikEll	ConcTikEll	ConcTikEll	ConcTikEll	ConcTikEll	ConcTikEll	ConcTikEll	ConcTikEll	ConcTikEll	ConcTikEll	ConcTikEll	0.63051	0.0800487	0.632497	0.0801116	0.63051	0.0801926			0.59638	0.0769688	0.592697	0.0771615	0.591249	0.0774596	0.576207	0.0800134	0.582504	0.0797885	0.601399	0.0795309	0.596924	0.0771496	0.609533	0.077661
																				0.632497	0.0802559	0.634486	0.0803184	0.632497	0.0804002			0.596818	0.0768021	0.593242	0.0769631	0.59179	0.0772785	0.571054	0.0798587	0.577418	0.0796742	0.598409	0.0794245	0.597429	0.0769577	0.611054	0.0776177
																				0.634486	0.0804631	0.636478	0.0805253	0.634486	0.0806078			0.597676	0.0766627	0.594312	0.0767903	0.592857	0.0771169	0.566248	0.0796923	0.572676	0.0795503	0.595621	0.0793108	0.598416	0.0767981	0.612826	0.0775964
																				0.636478	0.0806704	0.638472	0.0807323	0.636478	0.0808155			0.598936	0.0765533	0.595888	0.0766465	0.594429	0.0769778	0.561832	0.0795157	0.568318	0.0794177	0.593058	0.0791908	0.599868	0.076674	0.6148	0.0775977
																				0.638472	0.0808778	0.640469	0.0809393	0.638472	0.0810232			0.600575	0.076476	0.597937	0.0765344	0.596475	0.0768641	0.557842	0.0793304	0.56438	0.0792777	0.590743	0.0790654	0.601755	0.0765877	0.616922	0.0776214
																				0.640469	0.0810851	0.642468	0.0811463	0.640469	0.081231			0.602561	0.0764323	0.600422	0.0764563	0.598956	0.0767779	0.554312	0.0791378	0.560897	0.0791314	0.588695	0.0789359	0.604041	0.076541	0.619135	0.0776669
																				0.642468	0.0812925	0.64447	0.0813534	0.642468	0.0814388			0.604854	0.0764231	0.603292	0.0764136	0.601822	0.076721	0.551274	0.0789398	0.557898	0.0789801	0.586932	0.0788031	0.606681	0.0765346	0.621377	0.0777331
																				0.64447	0.0815	0.645889	0.0815	0.643058	0.0815			0.60741	0.0764486	0.606493	0.0764073	0.605019	0.0766943	0.548752	0.078738	0.555408	0.078825	0.585469	0.0786684	0.609624	0.0765689	0.623588	0.0778181
																				0.64447	0.0815	ConcBand	ConcBand	ConcBand	ConcBand			0.61018	0.0765083	0.609961	0.0764373	0.608485	0.0766985	0.546768	0.078534	0.55345	0.0786675	0.584318	0.0785328	0.612813	0.076643	0.625708	0.0779195
																				IsoLine	IsoLine							0.613109	0.0766009	0.61363	0.0765032	0.612151	0.0767334	0.545339	0.0783297	0.552039	0.0785089	0.583489	0.0783975	0.616185	0.0767555	0.627679	0.0780347
																												0.616141	0.0767248	0.617428	0.0766037	0.615946	0.0767985	0.544478	0.0781268	0.551188	0.0783507	0.58299	0.0782637	0.619676	0.0769044	0.629446	0.0781604
																												0.619217	0.0768774	0.621282	0.0767367	0.619797	0.0768923	0.544191	0.077927	0.550904	0.078194	0.582824	0.0781324	0.623216	0.0770865	0.630962	0.0782933
																												0.622276	0.0770559	0.625115	0.0768998	0.623628	0.0770131	0.544481	0.077732	0.55119	0.0780403	0.582993	0.0780049	0.626738	0.0772985	0.632186	0.0784297
																												0.625259	0.0772567	0.628854	0.0770896	0.627365	0.0771586	0.545346	0.0775435	0.552042	0.0778909	0.583495	0.0778822	0.630172	0.0775362	0.633083	0.0785659
																												0.628108	0.0774759	0.632425	0.0773026	0.630936	0.0773258	0.546778	0.0773631	0.553455	0.0777471	0.584326	0.0777653	0.633451	0.0777949	0.63363	0.0786982
																												0.630768	0.0777093	0.63576	0.0775347	0.63427	0.0775117	0.548765	0.0771923	0.555415	0.07761	0.58548	0.0776552	0.636513	0.0780697	0.633812	0.0788229
																												0.633186	0.0779523	0.638793	0.0777811	0.637303	0.0777124	0.55129	0.0770326	0.557905	0.0774809	0.586946	0.077553	0.639297	0.0783551
																												0.635316	0.0782002	0.641465	0.0780373	0.639976	0.0779241	0.554331	0.0768853	0.560906	0.0773608	0.588711	0.0774594	0.641749	0.0786457
																												0.637117	0.0784482	0.643725	0.0782982	0.642236	0.0781428	0.557863	0.0767518	0.56439	0.0772508	0.590761	0.0773753	0.643822	0.0789357
																												0.638553	0.0786915	0.645528	0.0785586	0.644041	0.0783641	0.561856	0.0766331	0.568329	0.0771518	0.593079	0.0773013	0.645474	0.0792195
																												0.639596	0.0789252	0.646839	0.0788137	0.645354	0.0785838	0.566275	0.0765303	0.572689	0.0770647	0.595644	0.0772382	0.646674	0.0794917
																												0.640226	0.0791449	0.647632	0.0790583	0.64615	0.0787975	0.571082	0.0764441	0.577432	0.0769901	0.598434	0.0771864	0.647399	0.0797468
																												0.640431	0.0793463	0.647893	0.0792877	0.646413	0.0790011	0.576237	0.0763755	0.582519	0.0769289	0.601426	0.0771464	0.647635	0.07998
																												Black	Black	Black	Black	Black	Black	0.581696	0.0763249	0.587905	0.0768813	0.604594	0.0771185	Black	Black
																																		0.587412	0.0762928	0.593545	0.076848	0.607911	0.077103
																																		0.593337	0.0762795	0.59939	0.076829	0.611349	0.0770999
																																		0.599419	0.076285	0.605391	0.0768247	0.614879	0.0771094
																																		0.605607	0.0763094	0.611497	0.0768351	0.61847	0.0771314
																																		0.611848	0.0763524	0.617655	0.07686	0.622092	0.0771656
																																		0.618088	0.0764136	0.623813	0.0768993	0.625714	0.0772117
																																		0.624276	0.0764926	0.629919	0.0769525	0.629304	0.0772695
																																		0.630357	0.0765886	0.63592	0.0770193	0.632833	0.0773383
																																		0.63628	0.0767009	0.641765	0.0770992	0.636271	0.0774176
																																		0.641995	0.0768284	0.647404	0.0771913	0.639587	0.0775067
																																		0.647452	0.0769702	0.652789	0.0772949	0.642753	0.0776049
																																		0.652606	0.0771249	0.657874	0.0774092	0.645744	0.0777112
																																		0.657411	0.0772913	0.662617	0.0775331	0.648532	0.0778249
																																		0.661828	0.0774679	0.666975	0.0776657	0.651095	0.077945
																																		0.665818	0.0776532	0.670913	0.0778057	0.65341	0.0780703
																																		0.669347	0.0778457	0.674396	0.077952	0.655458	0.0781999
																																		0.672386	0.0780438	0.677395	0.0781033	0.657221	0.0783326
																																		0.674908	0.0782456	0.679885	0.0782584	0.658684	0.0784674
																																		0.676892	0.0784495	0.681843	0.0784159	0.659835	0.078603
																																		0.67832	0.0786539	0.683254	0.0785745	0.660663	0.0787383
																																		0.679182	0.0788568	0.684104	0.0787327	0.661163	0.0788721
																																		0.679469	0.0790566	0.684388	0.0788894	0.661329	0.0790033
																																		Black	Black	Black	Black	Black	Black

## Sheet: PlotDat9
Source sheet	all data	0.622572	0.0789677	0.605627	0.0773023	0.621545	0.0789747	0.637621	0.0806498	0.653855	0.0823274	0.592092	0.076	0.593377	0.076	0.590814	0.076	0.588642	0.0756324	0.641155	0.0800088	0.652869	0.0800925	0.655798	0.0800153	0.655513	0.0804267	0.644323	0.08003	0.652488	0.0800702	0.651662	0.0800713	0.651387	0.0804835	0.673812	0.0806154	0.661324	0.0804306	0.656362	0.0808868	0.648595	0.0805758	0.659088	0.0807109	0.683191	0.080983	0.658005	0.0810178
Plot name	Concordia4	0.622962	0.0790374	0.605576	0.0773318	0.621492	0.079005	0.637566	0.0806807	0.653799	0.082359	0.592092	0.076	0.594676	0.076138	0.592092	0.0761364	0.604365	0.0773023	0.640965	0.080161	0.652736	0.0802446	0.655666	0.0801612	0.655377	0.0805872	0.644154	0.0801641	0.652255	0.080244	0.651454	0.0802189	0.65119	0.0806393	0.673619	0.0807963	0.661048	0.0806132	0.656232	0.0810328	0.648341	0.0807468	0.658843	0.0808853	0.682994	0.0811695	0.657869	0.0811648
Plot Type	1	0.626108	0.07907	0.605427	0.077359	0.621338	0.0790328	0.637408	0.0807091	0.653636	0.0823881	0.594676	0.0762749	0.597264	0.0764124	0.594676	0.0764118	0.620244	0.0789747	0.640417	0.08029	0.652349	0.0803863	0.655283	0.0802978	0.654983	0.0807356	0.643666	0.0802793	0.651573	0.0803989	0.650844	0.080352	0.650621	0.0807734	0.67305	0.0809685	0.660234	0.0807798	0.655851	0.0811695	0.647591	0.0809027	0.658122	0.0810425	0.682413	0.0813468	0.65747	0.081303
1st free col	61	0.625198	0.0791677	0.605192	0.0773816	0.621096	0.0790559	0.637158	0.0807327	0.653379	0.0824122	0.597264	0.0765498	0.599856	0.0766869	0.597264	0.0766872	0.636279	0.0806498	0.639522	0.0803932	0.651711	0.0805165	0.65465	0.0804239	0.654335	0.0808705	0.642867	0.0803735	0.650455	0.0805317	0.649844	0.0804679	0.649689	0.0808831	0.67211	0.0811305	0.658898	0.080927	0.655222	0.0812958	0.646361	0.0810406	0.65694	0.0811794	0.681453	0.0815134	0.656813	0.0814314
Sigma Level	2	0.627726	0.0791971	0.604889	0.0773978	0.620784	0.0790724	0.636837	0.0807496	0.653048	0.0824294	0.599856	0.0768248	0.602453	0.0769615	0.599856	0.0769628	0.652474	0.0823274	0.638297	0.0804687	0.650828	0.0806341	0.653774	0.0805384	0.653439	0.080991	0.641774	0.0804448	0.648923	0.08064	0.648472	0.0805644	0.648414	0.0809665	0.670806	0.0812809	0.657067	0.081052	0.654352	0.0814106	0.644674	0.0811579	0.65532	0.0812935	0.680122	0.0816679	0.655902	0.0815489
Absolute Errs	FALSE	0.629182	0.0792695	0.604545	0.0774062	0.620429	0.079081	0.63647	0.0807584	0.652671	0.0824384	0.602453	0.0770999	0.605054	0.0772361	0.602453	0.0772384	IsoLine	IsoLine	0.636765	0.080515	0.649707	0.080738	0.652662	0.0806405	0.652302	0.0810959	0.640407	0.0804918	0.647007	0.0807216	0.646756	0.0806395	0.64682	0.0810217	0.669149	0.0814186	0.654775	0.0811525	0.653247	0.0815128	0.642563	0.0812521	0.653292	0.0813824	0.678431	0.081809	0.654745	0.0816545
Symbol Type	1	0.630782	0.0794692	0.604185	0.0774062	0.620058	0.079081	0.636089	0.0807584	0.652277	0.0824384	0.605054	0.0773751	0.607659	0.0775109	0.605054	0.077514			0.634958	0.0805311	0.648358	0.0808275	0.651324	0.0807291	0.650933	0.0811844	0.638793	0.0805137	0.644744	0.080775	0.64473	0.0806918	0.644938	0.0810478	0.667154	0.0815422	0.652067	0.0812263	0.651917	0.0816017	0.640069	0.0813215	0.650897	0.0814444	0.676395	0.0819354	0.653352	0.0817472
Inverse Plot	FALSE	0.632028	0.0795245	0.603841	0.0773978	0.619703	0.0790724	0.635722	0.0807496	0.6519	0.0824294	0.607659	0.0776503	0.610268	0.0777856	0.607659	0.0777898			0.632909	0.0805168	0.646792	0.0809017	0.64977	0.0808036	0.649345	0.0812556	0.636964	0.0805098	0.642178	0.080799	0.642431	0.0807204	0.642805	0.0810443	0.664838	0.0816508	0.648996	0.0812722	0.650374	0.0816765	0.63724	0.0813648	0.648182	0.0814783	0.674031	0.082046	0.651735	0.0818263
Color Plot	FALSE	0.629496	0.079777	0.603538	0.0773816	0.619391	0.0790559	0.635401	0.0807327	0.651569	0.0824122	0.610268	0.0779256	0.612881	0.0780605	0.610268	0.0780656			0.63066	0.0804724	0.645023	0.08096	0.648014	0.0808632	0.647551	0.0813091	0.634955	0.0804805	0.639359	0.0807933	0.639906	0.0807246	0.640462	0.0810112	0.66222	0.0817433	0.645622	0.0812892	0.64863	0.0817365	0.634132	0.081381	0.645198	0.0814835	0.671359	0.08214	0.649909	0.0818911
3D plot	FALSE	0.633417	0.0797877	0.603303	0.077359	0.619149	0.0790328	0.635151	0.0807091	0.651312	0.0823881	0.612881	0.078201	0.615499	0.0783354	0.612881	0.0783415			0.628253	0.0803987	0.643066	0.0810018	0.646072	0.0809076	0.645566	0.0813442	0.632806	0.0804261	0.636342	0.0807579	0.637204	0.0807044	0.637954	0.0809492	0.659323	0.0818191	0.642011	0.0812769	0.6467	0.0817812	0.630806	0.0813699	0.642005	0.0814599	0.668402	0.0822166	0.647887	0.0819411
Linear	FALSE	0.62687	0.0799456	0.603154	0.0773318	0.618995	0.079005	0.634993	0.0806807	0.651148	0.082359	0.615499	0.0784764	0.618121	0.0786104	0.615499	0.0786174			0.625735	0.0802971	0.640937	0.081027	0.643959	0.0809363	0.643407	0.0813608	0.630557	0.0803479	0.633185	0.0806935	0.634376	0.0806601	0.635332	0.0808594	0.656172	0.0818775	0.638232	0.0812357	0.644601	0.0818103	0.627325	0.0813317	0.638664	0.0814078	0.665186	0.082275	0.645688	0.0819757
Data Range	AA22:AE47	0.622891	0.079977	0.603103	0.0773023	0.618942	0.0789747	0.634938	0.0806498	0.651092	0.0823274	0.618121	0.0787519	0.620747	0.0788855	0.618121	0.0788934			0.623156	0.0801696	0.638655	0.0810351	0.641694	0.0809491	0.641094	0.0813587	0.628254	0.0802472	0.629951	0.0806015	0.631479	0.0805926	0.632645	0.0807436	0.652793	0.081918	0.634359	0.0811663	0.642351	0.0818234	0.623758	0.0812672	0.63524	0.0813284	0.661737	0.0823148	0.643331	0.0819948
Filled Symbols	FALSE	0.634417	0.0800017	0.603154	0.0772727	0.618995	0.0789445	0.634993	0.0806188	0.651148	0.0822958	0.620747	0.0790275	0.623377	0.0791606	0.620747	0.0791695			0.620565	0.0800188	0.636239	0.0810262	0.639296	0.0809459	0.638644	0.0813379	0.62594	0.0801261	0.626702	0.0804835	0.628568	0.0805033	0.629946	0.0806042	0.649215	0.0819402	0.630469	0.08107	0.639969	0.0818206	0.620174	0.0811775	0.631801	0.0812232	0.658085	0.0823356	0.640835	0.0819982
ConcAge	TRUE	0.637961	0.0800923	0.603303	0.0772455	0.619149	0.0789166	0.635151	0.0805904	0.651312	0.0822668	0.623377	0.0793032	0.626012	0.0794358	0.623377	0.0794457			0.618013	0.0798475	0.63371	0.0810003	0.636785	0.0809266	0.63608	0.0812986	0.623661	0.0799869	0.623501	0.0803418	0.6257	0.0803939	0.627288	0.0804437	0.645469	0.0819439	0.626635	0.0809488	0.637475	0.0818017	0.616643	0.0810644	0.628412	0.0810942	0.654262	0.0823373	0.638222	0.0819858
ConcSwap	FALSE	0.627101	0.0801503	0.603538	0.0772229	0.619391	0.0788935	0.635401	0.0805668	0.651569	0.0822427	0.626012	0.0795789	0.628651	0.0797111	0.626012	0.0797219			0.615551	0.079659	0.631089	0.0809577	0.634184	0.0808915	0.633423	0.0812411	0.621461	0.0798323	0.62041	0.0801793	0.62293	0.0802664	0.624722	0.0802653	0.641587	0.0819292	0.622934	0.080805	0.634891	0.081767	0.613234	0.0809302	0.62514	0.080944	0.6503	0.0823198	0.635514	0.0819577
1st Symbol-row	1	0.633013	0.0802707	0.603841	0.0772067	0.619703	0.078877	0.635722	0.0805499	0.6519	0.0822254	0.628651	0.0798547	0.631294	0.0799865	0.628651	0.0799982			0.613224	0.0794572	0.628398	0.0808987	0.631513	0.0808409	0.630695	0.0811659	0.619383	0.0796654	0.617491	0.0799991	0.620314	0.0801235	0.622298	0.0800725	0.637602	0.0818961	0.619436	0.0806414	0.632238	0.0817167	0.610013	0.0807775	0.622048	0.0807754	0.646232	0.0822833	0.632735	0.0819142
		0.638623	0.080323	0.604185	0.0771983	0.620058	0.0788684	0.636089	0.0805411	0.652277	0.0822164	0.631294	0.0801305	0.633942	0.0802619	0.631294	0.0802746			0.61108	0.0792457	0.625662	0.0808238	0.628796	0.0807751	0.627921	0.0810737	0.617467	0.0794894	0.614799	0.0798047	0.617902	0.0799678	0.620063	0.079869	0.633547	0.0818449	0.616211	0.0804612	0.629539	0.0816514	0.607042	0.0806091	0.619198	0.0805917	0.642094	0.0822282	0.629907	0.0818557
		0.63459	0.0806674	0.604545	0.0771983	0.620429	0.0788684	0.63647	0.0805411	0.652671	0.0822164	0.633942	0.0804065	0.636594	0.0805374	0.633942	0.0805511			0.60916	0.0790289	0.622902	0.0807337	0.626057	0.0806948	0.625124	0.0809652	0.615751	0.0793076	0.612387	0.0795998	0.61574	0.0798023	0.618062	0.0796588	0.629458	0.0817761	0.61332	0.0802678	0.626818	0.0815715	0.60438	0.0804285	0.616643	0.0803966	0.63792	0.0821548	0.627055	0.0817826
		0.634952	0.0807185	0.604889	0.0772067	0.620784	0.078877	0.636837	0.0805499	0.653048	0.0822254	0.636594	0.0806825	0.63925	0.0808129	0.636594	0.0808276			0.6075	0.0788109	0.620143	0.0806291	0.623318	0.0806007	0.622327	0.0808413	0.614268	0.0791238	0.610301	0.0793886	0.613871	0.0796305	0.616332	0.079446	0.625369	0.0816902	0.610821	0.0800651	0.624097	0.0814777	0.602078	0.0802391	0.614435	0.0801938	0.633747	0.0820638	0.624204	0.0816956
		IsoLine	IsoLine	0.605192	0.0772229	0.621096	0.0788935	0.637158	0.0805668	0.653379	0.0822427	0.63925	0.0809585	0.64191	0.0810885	0.63925	0.0811042			0.606134	0.0785959	0.617407	0.0805109	0.620602	0.0804935	0.619555	0.0807032	0.613047	0.0789413	0.608584	0.079175	0.612331	0.0794554	0.614908	0.0792348	0.621316	0.081588	0.608762	0.079857	0.621399	0.0813709	0.600181	0.0800445	0.612615	0.0799872	0.62961	0.081956	0.621378	0.0815954
				0.605427	0.0772455	0.621338	0.0789166	0.637408	0.0805904	0.653636	0.0822668	0.64191	0.0812347	0.644575	0.0813642	0.64191	0.0813808			0.605088	0.0783882	0.61472	0.0803802	0.617934	0.0803741	0.616831	0.080552	0.612112	0.0787638	0.607267	0.0789633	0.61115	0.0792807	0.613817	0.0790291	0.617332	0.0814703	0.607182	0.0796476	0.618749	0.0812519	0.598726	0.0798487	0.61122	0.0797809	0.625544	0.0818323	0.6186	0.0814829
				0.605576	0.0772727	0.621492	0.0789445	0.637566	0.0806188	0.653799	0.0822958	0.644575	0.0815109	0.647244	0.08164	0.644575	0.0816575			0.604382	0.0781917	0.612102	0.080238	0.615335	0.0802436	0.614178	0.080389	0.611481	0.0785948	0.606377	0.0787575	0.610351	0.0791096	0.61308	0.0788332	0.613452	0.0813382	0.606113	0.0794409	0.616167	0.0811217	0.597741	0.0796553	0.610276	0.0795789	0.621584	0.0816937	0.615895	0.081359
				0.605627	0.0773023	0.621545	0.0789747	0.637621	0.0806498	0.653855	0.0823274	0.647244	0.0817872	0.649918	0.0819159	0.647244	0.0819343			0.60403	0.0780104	0.609577	0.0800855	0.612828	0.0801031	0.611619	0.0802156	0.611166	0.0784375	0.60593	0.0785616	0.60995	0.0789455	0.612712	0.0786506	0.609709	0.0811928	0.605576	0.0792409	0.613677	0.0809815	0.597246	0.0794683	0.609803	0.0793852	0.617764	0.0815415	0.613285	0.0812248
				ConcTikEll	ConcTikEll	ConcTikEll	ConcTikEll	ConcTikEll	ConcTikEll	ConcTikEll	ConcTikEll	0.649918	0.0820635	0.652595	0.0821918	0.649918	0.0822112			0.60404	0.0778476	0.607167	0.0799241	0.610435	0.0799538	0.609176	0.0800332	0.611173	0.078295	0.605937	0.0783796	0.609955	0.0787916	0.612721	0.0784851	0.606134	0.0810353	0.60558	0.0790516	0.6113	0.0808325	0.597251	0.0792911	0.609808	0.0792034	0.614116	0.0813769	0.610793	0.0810814
												0.652595	0.08234	0.655277	0.0824677	0.652595	0.0824882			0.604409	0.0777067	0.604891	0.0797552	0.608175	0.079797	0.60687	0.0798434	0.611502	0.07817	0.606395	0.0782149	0.610365	0.0786508	0.613105	0.0783398	0.602759	0.0808671	0.606126	0.0788766	0.609055	0.0806759	0.597754	0.0791272	0.610292	0.0790372	0.610671	0.0812014	0.608441	0.0809301
												0.655277	0.0826165	0.657964	0.0827438	0.655277	0.0827652			0.605133	0.0775903	0.602769	0.0795801	0.606069	0.0796339	0.60472	0.0796479	0.612147	0.078065	0.607298	0.0780707	0.611172	0.0785261	0.613857	0.0782176	0.599612	0.0806895	0.607203	0.0787194	0.606962	0.0805131	0.598746	0.07898	0.611246	0.0788898	0.607459	0.0810164	0.606248	0.0807721
												0.657964	0.082893	0.660655	0.0830199	0.657964	0.0830423			0.606196	0.0775008	0.600819	0.0794004	0.604133	0.0794661	0.602745	0.0794483	0.613096	0.0779821	0.608626	0.0779498	0.612361	0.0784196	0.614963	0.0781208	0.59672	0.0805042	0.608791	0.0785829	0.605039	0.0803454	0.600209	0.0788521	0.612651	0.078764	0.604508	0.0808235	0.604232	0.0806088
												0.660655	0.0831697	0.66335	0.0832961	0.660655	0.0833194			0.607577	0.0774398	0.599059	0.0792176	0.602385	0.0792948	0.600962	0.0792462	0.614329	0.0779228	0.610354	0.0778546	0.613908	0.0783336	0.616401	0.0780514	0.594108	0.0803127	0.610858	0.0784699	0.603303	0.0801744	0.602112	0.0787461	0.614479	0.0786623	0.601842	0.0806244	0.602412	0.0804416
												0.66335	0.0834464	0.66605	0.0835724	0.66335	0.0835966			0.609251	0.0774085	0.597502	0.0790332	0.600839	0.0791217	0.599385	0.0790435	0.615823	0.0778883	0.612449	0.077787	0.615784	0.0782697	0.618143	0.0780106	0.591798	0.0801166	0.613364	0.0783825	0.601767	0.0800013	0.604421	0.0786641	0.616695	0.0785866	0.599484	0.0804207	0.600802	0.0802719
												0.66605	0.0837232	0.668754	0.0838487	0.66605	0.0838739			0.611183	0.0774075	0.596163	0.0788489	0.599509	0.0789481	0.598028	0.0788419	0.617548	0.0778793	0.614869	0.0777482	0.617952	0.0782292	0.620156	0.0779992	0.589809	0.0799176	0.61626	0.0783225	0.600446	0.0798278	0.607089	0.0786076	0.619257	0.0785385	0.597454	0.0802142	0.599417	0.0801012
												0.668754	0.084	0.670236	0.084	0.667279	0.084			0.613338	0.077437	0.595052	0.0786662	0.598405	0.0787755	0.596904	0.0786431	0.619472	0.0778959	0.617568	0.077739	0.620369	0.0782127	0.6224	0.0780176	0.588159	0.0797174	0.61949	0.078291	0.59935	0.0796553	0.610064	0.0785778	0.622113	0.0785189	0.59577	0.0800067	0.598268	0.0799309
												0.668754	0.084	ConcBand	ConcBand	ConcBand	ConcBand			0.615672	0.0774962	0.594179	0.0784867	0.597538	0.0786054	0.59602	0.0784487	0.621556	0.0779378	0.620494	0.0777596	0.622989	0.0782208	0.624831	0.0780653	0.586861	0.0795177	0.622992	0.0782886	0.598489	0.0794853	0.613289	0.0785752	0.625209	0.0785282	0.594446	0.0798	0.597365	0.0797625
												IsoLine	IsoLine							0.61814	0.0775841	0.593552	0.0783118	0.596915	0.0784394	0.595386	0.0782604	0.62376	0.0780043	0.623588	0.0778096	0.625761	0.0782531	0.627402	0.0781414	0.585927	0.0793203	0.626696	0.0783154	0.59787	0.0793192	0.616701	0.0785999	0.628484	0.0785661	0.593493	0.0795957	0.596715	0.0795974
																				0.620695	0.0776989	0.593176	0.0781432	0.596541	0.0782787	0.595006	0.0780799	0.626042	0.078094	0.626791	0.077888	0.628631	0.0783091	0.630063	0.0782444	0.585365	0.0791267	0.630531	0.0783709	0.597498	0.0791585	0.620233	0.0786514	0.631875	0.078632	0.59292	0.0793956	0.596325	0.079437
																				0.623286	0.0778383	0.593054	0.0779822	0.596419	0.0781247	0.594884	0.0779087	0.628356	0.0782052	0.630041	0.0779933	0.631542	0.0783877	0.632762	0.0783723	0.58518	0.0789387	0.634422	0.0784539	0.597377	0.0790045	0.623817	0.0787287	0.635315	0.0787245	0.592731	0.0792015	0.596197	0.0792827
																				0.625864	0.0779998	0.593187	0.0778302	0.596551	0.0779788	0.59502	0.0777483	0.630658	0.0783356	0.633274	0.0781235	0.634439	0.0784873	0.635448	0.0785227	0.585372	0.0787578	0.638293	0.0785629	0.597508	0.0788585	0.627383	0.0788303	0.638738	0.0788419	0.592927	0.079015	0.596333	0.0791357
																				0.628377	0.0781801	0.593574	0.0776884	0.596934	0.0778422	0.595414	0.0775999	0.632903	0.0784829	0.636427	0.0782759	0.637264	0.0786061	0.638066	0.0786926	0.585941	0.0785856	0.64207	0.0786958	0.597889	0.0787217	0.630862	0.0789542	0.642076	0.0789818	0.593508	0.0788377	0.596732	0.0789975
																				0.630777	0.0783758	0.594212	0.0775582	0.597567	0.0777161	0.596061	0.0774649	0.635048	0.078644	0.639439	0.0784477	0.639964	0.0787416	0.640567	0.0788786	0.586882	0.0784236	0.645678	0.0788499	0.598517	0.0785955	0.634185	0.0790981	0.645266	0.0791417	0.594468	0.0786711	0.59739	0.0788691
																				0.633018	0.0785829	0.595095	0.0774406	0.598443	0.0776016	0.596958	0.0773444	0.637049	0.0788159	0.642252	0.0786355	0.642484	0.0788913	0.642902	0.0790772	0.588186	0.0782731	0.649048	0.0790222	0.599387	0.0784807	0.637289	0.079259	0.648244	0.0793182	0.5958	0.0785166	0.598301	0.0787516
																				0.635055	0.0787976	0.596216	0.0773367	0.599555	0.0774996	0.598095	0.0772395	0.63887	0.0789952	0.64481	0.0788356	0.644777	0.0790522	0.645025	0.0792846	0.589842	0.0781355	0.652113	0.0792095	0.600492	0.0783784	0.640112	0.0794339	0.650953	0.0795081	0.597491	0.0783755	0.599458	0.078646
																				0.63685	0.0790155	0.597565	0.0772472	0.600893	0.0774109	0.599464	0.0771511	0.640473	0.0791785	0.647064	0.0790441	0.646797	0.0792213	0.646896	0.0794966	0.591837	0.0780119	0.654815	0.079408	0.601822	0.0782895	0.642601	0.0796194	0.65334	0.0797075	0.599527	0.0782491	0.60085	0.0785533
																				0.638366	0.0792326	0.599131	0.077173	0.602447	0.0773365	0.601052	0.0770798	0.641828	0.0793621	0.64897	0.0792571	0.648506	0.0793952	0.648476	0.0797091	0.594154	0.0779033	0.6571	0.0796138	0.603365	0.0782148	0.644705	0.0798118	0.655359	0.0799127	0.601891	0.0781385	0.602467	0.0784742
																				0.639575	0.0794444	0.6009	0.0771147	0.604203	0.0772768	0.602846	0.0770264	0.642909	0.0795425	0.650491	0.0794703	0.64987	0.0795705	0.649737	0.079918	0.596771	0.0778107	0.658924	0.0798231	0.605109	0.0781548	0.646385	0.0800075	0.65697	0.0801197	0.604563	0.0780445	0.604294	0.0784094
																				0.640453	0.079647	0.602857	0.0770729	0.606145	0.0772324	0.604831	0.0769912	0.643694	0.0797161	0.651598	0.0796795	0.650862	0.0797439	0.650653	0.0801193	0.599668	0.0777349	0.660251	0.0800317	0.607039	0.0781101	0.647608	0.0802026	0.658143	0.0803243	0.607519	0.0779679	0.606315	0.0783594
																				0.640983	0.0798364	0.604986	0.0770477	0.608258	0.0772037	0.606989	0.0769746	0.644169	0.0798797	0.652267	0.0798808	0.651463	0.0799119	0.651207	0.0803091	0.60282	0.0776765	0.661056	0.0802355	0.609138	0.078081	0.648349	0.0803933	0.658853	0.0805226	0.610736	0.0779095	0.608514	0.0783248
																				0.641155	0.0800088	0.607268	0.0770396	0.610523	0.0771909	0.609303	0.0769767	0.644323	0.08003	0.652488	0.0800702	0.651662	0.0800713	0.651387	0.0804835	0.606198	0.0776361	0.661324	0.0804306	0.611388	0.0780678	0.648595	0.0805758	0.659088	0.0807109	0.614185	0.0778697	0.610871	0.0783057
																				Black	Black	0.609684	0.0770485	0.612921	0.0771942	0.611753	0.0769975	Black	Black	Black	Black	Black	Black	Black	Black	0.609776	0.0776139	Black	Black	0.61377	0.0780707	Black	Black	Black	Black	0.617836	0.0778489	0.613367	0.0783023
																						0.612214	0.0770744	0.615432	0.0772134	0.614317	0.0770368									0.613522	0.0776101			0.616264	0.0780896					0.62166	0.0778472	0.61598	0.0783147
																						0.614835	0.077117	0.618033	0.0772485	0.616974	0.0770943									0.617404	0.0776249			0.618849	0.0781243					0.625622	0.0778647	0.618688	0.0783428
																						0.617525	0.077176	0.620704	0.0772991	0.619701	0.0771695									0.62139	0.077658			0.621501	0.0781745					0.62969	0.0779012	0.621468	0.0783863
																						0.620262	0.0772509	0.623421	0.0773649	0.622476	0.0772618									0.625444	0.0777092			0.6242	0.0782399					0.633828	0.0779563	0.624295	0.0784448
																						0.623022	0.077341	0.62616	0.0774452	0.625273	0.0773703									0.629534	0.077778			0.626922	0.0783198					0.638001	0.0780297	0.627147	0.0785179
																						0.625781	0.0774456	0.628899	0.0775393	0.62807	0.0774941									0.633622	0.0778639			0.629643	0.0784136					0.642175	0.0781207	0.629998	0.0786049
																						0.628516	0.0775638	0.631615	0.0776465	0.630842	0.0776322									0.637676	0.0779661			0.63234	0.0785204					0.646312	0.0782285	0.632825	0.0787051
																						0.631204	0.0776945	0.634283	0.0777659	0.633566	0.0777834									0.64166	0.0780838			0.634991	0.0786394					0.650378	0.0783522	0.635603	0.0788176
																						0.633821	0.0778367	0.636882	0.0778964	0.636219	0.0779464									0.64554	0.0782159			0.637572	0.0787696					0.654338	0.0784908	0.638308	0.0789415
																						0.636346	0.0779892	0.639388	0.0780369	0.638778	0.0781199									0.649283	0.0783613			0.640062	0.0789097					0.658158	0.078643	0.640917	0.0790757
																						0.638757	0.0781506	0.641782	0.0781862	0.64122	0.0783023									0.652857	0.0785188			0.64244	0.0790588					0.661806	0.0788076	0.643409	0.0792191
																						0.641033	0.0783195	0.644042	0.078343	0.643527	0.078492									0.656232	0.078687			0.644684	0.0792154					0.665251	0.0789831	0.645762	0.0793704
																						0.643155	0.0784946	0.646148	0.0785061	0.645676	0.0786876									0.659379	0.0788645			0.646777	0.0793782					0.668462	0.0791681	0.647955	0.0795284
																						0.645104	0.0786743	0.648084	0.0786739	0.647651	0.0788872									0.662271	0.0790499			0.6487	0.0795458					0.671414	0.079361	0.64997	0.0796917
																						0.646865	0.0788571	0.649832	0.0788452	0.649435	0.0790892									0.664884	0.0792414			0.650436	0.0797169					0.67408	0.0795601	0.651791	0.0798589
																						0.648421	0.0790415	0.651378	0.0790183	0.651012	0.0792919									0.667194	0.0794375			0.651972	0.0798899					0.676438	0.0797638	0.6534	0.0800286
																						0.649761	0.0792258	0.652708	0.079192	0.652368	0.0794935									0.669183	0.0796365			0.653293	0.0800634					0.678467	0.0799703	0.654786	0.0801993
																						0.650871	0.0794085	0.653812	0.0793645	0.653493	0.0796924									0.670833	0.0798367			0.654389	0.0802359					0.680151	0.0801778	0.655935	0.0803696
																						0.651744	0.079588	0.654679	0.0795346	0.654376	0.0798868									0.672131	0.0800363			0.655251	0.0804059					0.681475	0.0803846	0.656838	0.080538
																						0.652371	0.0797629	0.655302	0.0797006	0.655011	0.080075									0.673064	0.0802338			0.65587	0.080572					0.682428	0.0805888	0.657487	0.0807031
																						0.652747	0.0799315	0.655676	0.0798614	0.655391	0.0802555									0.673626	0.0804274			0.656241	0.0807328					0.683002	0.0807889	0.657877	0.0808635
																						0.652869	0.0800925	0.655798	0.0800153	0.655513	0.0804267									0.673812	0.0806154			0.656362	0.0808868					0.683191	0.080983	0.658005	0.0810178
																						Black	Black	Black	Black	Black	Black									Black	Black			Black	Black					Black	Black	Black	Black
[truncated: 10 more columns]

[truncated: 1 more sheets: data table]
