# Supplementary material for: A tectonic carpet of Variscan flysch at the base of a rootless accretionary prism in northwestern Iberia: U–Pb zircon age constrains from sediments and volcanic olistoliths
Source: Copernicus journal article supplement (doi:10.5194/se-12-835-2021), 2021-04-15
Supplement: Supplementary file 5 [file se-12-835-2021-supplement.zip]

Archive with 62 entries (58 files):
- Supp FIle 1_Zircon geochrnology and MDS PROCESS of NW IBERIA SYNOROGENICS_FINAL6march2021.pdf
- SUPP FILE FIGURES/
- SUPP FILE FIGURES/FIG_SF1_3_MDS UPa_CIZ.pdf
- SUPP FILE FIGURES/FIG_SF1_6_MDS GTMZ.jpg
- SUPP FILE FIGURES/FIG_SF1_4_MDS WALZ.pdf
- SUPP FILE FIGURES/FIG_SF1_7_MDS GTMZ_UP_CIZ.jpg
- SUPP FILE FIGURES/FIG_SF1_2_MDS CIZ.pdf
- SUPP FILE FIGURES/FIG_SF1_8_MDS_Synorogenics NWIberia.pdf
- SUPP FILE FIGURES/FIG_SF1_3_MDS UPa_CIZ.jpg
- SUPP FILE FIGURES/TABLE SF1.pdf
- SUPP FILE FIGURES/FIG_SF1_8_MDS_Synorogenics NWIberia_REV.jpg
- SUPP FILE FIGURES/TABLE SF1.jpg
- SUPP FILE FIGURES/FIG_SF1_2_MDS CIZ.jpg
- SUPP FILE FIGURES/FIG_SF1_7_MDS GTMZ_UP_CIZ.pdf
- SUPP FILE FIGURES/FIG_SF1_1_Sample map.pdf
- SUPP FILE FIGURES/FIG_SF1_4_MDS WALZ.jpg
- SUPP FILE FIGURES/FIG_SF1_1_Sample map.jpg
- SUPP FILE FIGURES/FIG_SF1_6_MDS GTMZ.pdf
- SUPP FILE FIGURES/FIG_SF1_8_MDS_Synorogenics NWIberia_REV.pdf
- SUPP FILE FIGURES/FIG_SF1_5_MDS OMZ.jpg
- SUPP FILE FIGURES/FIG_SF1_5_MDS OMZ.pdf
- Supplementary Images/
- Supplementary Images/SI-7_Fichas Idades e zircões_P381_P385.pdf
- Supplementary Images/SI-2_Fichas Idades e zircões_GIM_EC293.pdf
- Supplementary Images/SI-1_Fichas Idades e zircões_CR_MEI.pdf
- Supplementary Images/SI-6_Fichas Idades e zircões_PICON.pdf
- Supplementary Images/SI-5_Fichas Idades e zircões_AD55_AD57.pdf
- Supplementary Images/SI-9_Fichas Idades e zircões_PET1_RAB1.pdf
- Supplementary Images/SI-8_Fichas Idades e zircões_EC337_EC419.pdf
- Supplementary Images/SI-3_Fichas Idades e zircões_AD66_AD48B.pdf
- Supplementary Images/SI-4_Fichas Idades e zircões_MIR_AD49.pdf
- SUPP TABLES/
- SUPP TABLES/Supplementary Table 5_AD-PO-66.xls
- SUPP TABLES/Supplementary Table 18_Potential sources NW Iberia detrital zircon database.xlsx
- SUPP TABLES/Supplementary Table 13_P383.xls
- SUPP TABLES/Supplementary Table 17_RAB1.xls
- SUPP TABLES/Supplementary Table 9_AD-PO-55.xls
- SUPP TABLES/Supplementary Table 10_AD-PO-57.xls
- SUPP TABLES/Supplementary Table 11_PICON2.xls
- SUPP TABLES/Supplementary Table 12_P381.xls
- SUPP TABLES/Supplementary Table 6_AD-PO-48B.xls
- SUPP TABLES/Supplementary Table 14_EC-PO-337.xls
- SUPP TABLES/Supplementary Table 2_MEIZR01.xls
- SUPP TABLES/Supplementary Table 7_MIR41.xls
- SUPP TABLES/Supplementary Table 15_EC-PO-419.xls
- SUPP TABLES/Supplementary Table 3_GIMZR01.xls
- SUPP TABLES/Supplementary Table 19_Synorogenic samples_Preparation to MDS.xlsx
- SUPP TABLES/Supplementary Table 8_AD-PO-49.xls
- SUPP TABLES/Supplementary Table 16_PET1.xls
- SUPP TABLES/Supplementary Table 4_EC-PO-293.xls
- SUPP TABLES/Supplementary Table 1_CRZR01.xls
- SuppFileFiguresSVG/
- SuppFileFiguresSVG/TABLE SF1.svg
- SuppFileFiguresSVG/FIG_SF1_2_MDS CIZ.svg
- SuppFileFiguresSVG/FIG_SF1_8_MDS_Synorogenics NWIberia_REV.svg
- SuppFileFiguresSVG/FIG_SF1_1_Sample map.svg
- SuppFileFiguresSVG/FIG_SF1_4_MDS WALZ.svg
- SuppFileFiguresSVG/FIG_SF1_3_MDS UPa_CIZ.svg
- SuppFileFiguresSVG/FIG_SF1_6_MDS GTMZ.svg
- SuppFileFiguresSVG/FIG_SF1_7_MDS GTMZ_UP_CIZ.svg
- SuppFileFiguresSVG/FIG_SF1_5_MDS OMZ.svg
- se-12-835-2021-supplement-title-page.pdf
