# Supplementary material for: A tectonic carpet of Variscan flysch at the base of a rootless accretionary prism in northwestern Iberia: U–Pb zircon age constrains from sediments and volcanic olistoliths
Source: Copernicus journal article supplement (doi:10.5194/se-12-835-2021), 2021-04-15
Supplement: Supplementary file 5 [file se-12-835-2021-supplement.zip › se-12-835-2021-supplement-title-page.pdf]

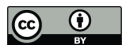

## *Supplement of*

# **A tectonic carpet of Variscan flysch at the base of a rootless accretionary prism in northwestern Iberia: U–Pb zircon age constrains from sediments and volcanic olistoliths**

**Emilio González Clavijo et al.**

*Correspondence to:* Ícaro Dias da Silva (ipicaparopo@gmail.com)

- se-12-835-2021-supplement-title-page.pdf
- SUPP FILE FIGURES
  - FIG\_SF1\_1\_Sample map.jpg
  - FIG\_SF1\_1\_Sample map.pdf
  - FIG\_SF1\_2\_MDS CIZ.jpg
  - FIG\_SF1\_2\_MDS CIZ.pdf
  - FIG\_SF1\_3\_MDS UPa\_CIZ.jpg
  - FIG\_SF1\_3\_MDS UPa\_CIZ.pdf
  - FIG\_SF1\_4\_MDS WALZ.jpg
  - FIG\_SF1\_4\_MDS WALZ.pdf
  - FIG\_SF1\_5\_MDS OMZ.jpg
  - FIG\_SF1\_5\_MDS OMZ.pdf
  - FIG\_SF1\_6\_MDS GTMZ.jpg
  - FIG\_SF1\_6\_MDS GTMZ.pdf
  - FIG\_SF1\_7\_MDS GTMZ\_UP\_CIZ.jpg
  - FIG\_SF1\_7\_MDS GTMZ\_UP\_CIZ.pdf
  - FIG\_SF1\_8\_MDS\_Synorogenics NWIberia.pdf
  - FIG\_SF1\_8\_MDS\_Synorogenics NWIberia\_REV.jpg
  - FIG\_SF1\_8\_MDS\_Synorogenics NWIberia\_REV.pdf
  - TABLE SF1.jpg
  - TABLE SF1.pdf
- SUPP TABLES
  - Supplementary Table 10\_AD-PO-57.xls

- Supplementary Table 11\_PICON2.xls
- Supplementary Table 12\_P381.xls
- Supplementary Table 13\_P383.xls
- Supplementary Table 14\_EC-PO-337.xls
- Supplementary Table 15\_EC-PO-419.xls
- Supplementary Table 16\_PET1.xls
- Supplementary Table 17\_RAB1.xls
- Supplementary Table 18\_Potential sources NW Iberia detrital zircon database.xlsx
- Supplementary Table 19\_Synorogenic samples\_Preparation to MDS.xlsx
- Supplementary Table 1\_CRZR01.xls
- Supplementary Table 2\_MEIZR01.xls
- Supplementary Table 3\_GIMZR01.xls
- Supplementary Table 4\_EC-PO-293.xls
- Supplementary Table 5\_AD-PO-66.xls
- Supplementary Table 6\_AD-PO-48B.xls
- Supplementary Table 7\_MIR41.xls
- Supplementary Table 8\_AD-PO-49.xls
- Supplementary Table 9\_AD-PO-55.xls
- Supp File 1\_Zircon geochronology and MDS PROCESS of NW IBERIA SYNOROGENICS\_FINAL6march2021.pdf
- SuppFileFiguresSVG
  - FIG\_SF1\_1\_Sample map.svg
  - FIG\_SF1\_2\_MDS CIZ.svg
  - FIG\_SF1\_3\_MDS UPa\_CIZ.svg
  - FIG\_SF1\_4\_MDS WALZ.svg
  - FIG\_SF1\_5\_MDS OMZ.svg
  - FIG\_SF1\_6\_MDS GTMZ.svg
  - FIG\_SF1\_7\_MDS GTMZ\_UP\_CIZ.svg
  - FIG\_SF1\_8\_MDS\_Synorogenics NWIberia\_REV.svg
  - TABLE SF1.svg
- Supplementary Images
  - SI-1\_Fichas Idades e zircões\_CR\_MEI.pdf
  - SI-2\_Fichas Idades e zircões\_GIM\_EC293.pdf
  - SI-3\_Fichas Idades e zircões\_AD66\_AD48B.pdf
  - SI-4\_Fichas Idades e zircões\_MIR\_AD49.pdf
  - SI-5\_Fichas Idades e zircões\_AD55\_AD57.pdf
  - SI-6\_Fichas Idades e zircões\_PICON.pdf
  - SI-7\_Fichas Idades e zircões\_P381\_P385.pdf
  - SI-8\_Fichas Idades e zircões\_EC337\_EC419.pdf
  - SI-9\_Fichas Idades e zircões\_PET1\_RAB1.pdf

The copyright of individual parts of the supplement might differ from the article licence.
