# Supplementary material for: A tectonic carpet of Variscan flysch at the base of a rootless accretionary prism in northwestern Iberia: U–Pb zircon age constrains from sediments and volcanic olistoliths
Source: Copernicus journal article supplement (doi:10.5194/se-12-835-2021), 2021-04-15
Supplement: Supplementary file 5 [file se-12-835-2021-supplement.zip › SUPP TABLES/Supplementary Table 1_CRZR01.xls]

## Sheet: PlotDat0
Source sheet	all data	0.564194	0.0726172	440		450		460		470		480		0.53	0.0692789	0.53	0.0691549	0.527276	0.0689787	0.581288	0.0739099	0.595389	0.0755062	0.607438	0.0762574	0.608658	0.0764523	0.60981	0.0765331	0.608066	0.0776071	0.590522	0.0752376
Plot name	Concordia1	0.576222	0.0742941	0.543504	0.0706383	0.558806	0.0723004	0.574259	0.0739651	0.589866	0.0756324	0.605627	0.0773023	0.53	0.0692789	0.53	0.0691549	0.542391	0.0706383	0.580944	0.0740954	0.595005	0.075723	0.607067	0.0764621	0.608266	0.076669	0.609356	0.0767894	0.60763	0.0777918	0.590329	0.075343
Plot Type	1	0.588954	0.0750241	0.543482	0.070657	0.558784	0.0723195	0.574236	0.0739847	0.589842	0.0756524	0.605603	0.0773227	0.533019	0.0696109	0.533019	0.0694863	0.557657	0.0723004	0.579956	0.074224	0.5939	0.0758848	0.606001	0.0766116	0.607137	0.0768267	0.608037	0.0769936	0.606382	0.0778871	0.589775	0.075418
1st free col	35	0.589097	0.0751361	0.543419	0.0706749	0.558718	0.0723379	0.574169	0.0740035	0.589773	0.0756717	0.605531	0.0773425	0.536043	0.069943	0.536043	0.0698178	0.573073	0.0739651	0.578362	0.0742909	0.592115	0.0759855	0.604279	0.0767001	0.605315	0.0769195	0.605905	0.0771378	0.604371	0.0778896	0.588881	0.0754597
Sigma Level	2	0.586862	0.0754333	0.543316	0.0706915	0.558612	0.0723549	0.574059	0.0740209	0.58966	0.0756894	0.605415	0.0773606	0.539074	0.0702752	0.539074	0.0701494	0.588642	0.0756324	0.576224	0.0742935	0.58972	0.0760212	0.601969	0.0767242	0.60287	0.0769438	0.603041	0.0772165	0.601674	0.0777989	0.587682	0.0754664
Absolute Errs	FALSE	0.58652	0.0754688	0.543178	0.070706	0.558469	0.0723697	0.573912	0.0740361	0.589507	0.075705	0.605258	0.0773765	0.54211	0.0706075	0.54211	0.0704811	0.604365	0.0773023	0.573623	0.0742316	0.586806	0.0759906	0.599158	0.0766829	0.599895	0.0768986	0.599555	0.0772266	0.598395	0.0776188	0.586223	0.0754378
Symbol Type	1	IsoLine	IsoLine	0.543009	0.0707179	0.558295	0.0723819	0.573732	0.0740485	0.589322	0.0757178	0.605066	0.0773896	0.545153	0.07094	0.545153	0.0708129	IsoLine	IsoLine	0.57066	0.0741077	0.583485	0.0758947	0.595955	0.0765779	0.596506	0.0767856	0.595581	0.0771679	0.594659	0.077356	0.584561	0.0753752
Inverse Plot	FALSE			0.542817	0.0707267	0.558096	0.072391	0.573527	0.0740578	0.58911	0.0757273	0.604848	0.0773993	0.548201	0.0712725	0.548201	0.0711449			0.567449	0.0739265	0.579885	0.0757374	0.592483	0.0764132	0.592831	0.0766093	0.591272	0.0770425	0.590611	0.0770207	0.582759	0.0752809
Color Plot	TRUE			0.542608	0.0707321	0.557881	0.0723965	0.573304	0.0740635	0.588881	0.0757331	0.604611	0.0774053	0.551255	0.0716051	0.551255	0.0714769			0.564112	0.073695	0.576144	0.0755245	0.588875	0.0761951	0.589014	0.0763764	0.586794	0.0768552	0.586405	0.0766258	0.580888	0.0751584
3D plot	FALSE			0.542391	0.070734	0.557657	0.0723984	0.573073	0.0740655	0.588642	0.0757351	0.604365	0.0774073	0.554316	0.0719378	0.554316	0.071809			0.560779	0.0734221	0.572406	0.0752644	0.585271	0.075932	0.585199	0.0760958	0.582319	0.0766133	0.582204	0.0761863	0.579017	0.0750126
Linear	FALSE			0.542174	0.0707321	0.557432	0.0723965	0.572842	0.0740635	0.588403	0.0757331	0.604119	0.0774053	0.557383	0.0722707	0.557383	0.0721412			0.557577	0.0731183	0.568815	0.074967	0.581808	0.0756339	0.581534	0.0757783	0.578018	0.0763261	0.578168	0.0757194	0.577221	0.0748491
Data Range	AC4:AG9			0.541966	0.0707267	0.557217	0.072391	0.572619	0.0740578	0.588174	0.0757273	0.603882	0.0773993	0.560455	0.0726036	0.560455	0.0724735			0.554629	0.0727951	0.565509	0.0746438	0.578619	0.0753125	0.57816	0.0754361	0.574057	0.0760045	0.574454	0.0752427	0.575567	0.074674
Filled Symbols	TRUE			0.541773	0.0707179	0.557018	0.0723819	0.572414	0.0740485	0.587962	0.0757178	0.603664	0.0773896	0.563534	0.0729367	0.563534	0.072806			0.552049	0.0724652	0.562614	0.0743071	0.575828	0.07498	0.575206	0.0750824	0.570588	0.075661	0.571203	0.0747748	0.574119	0.0744942
ConcAge	TRUE			0.541605	0.070706	0.556844	0.0723697	0.572234	0.0740361	0.587776	0.075705	0.603472	0.0773765	0.566619	0.0732698	0.566619	0.0731385			0.549935	0.0721411	0.560242	0.0739699	0.573541	0.0746492	0.572786	0.0747308	0.567744	0.0753088	0.568541	0.0743335	0.572933	0.0743165
ConcSwap	FALSE			0.541466	0.0706915	0.556701	0.0723549	0.572087	0.0740209	0.587624	0.0756894	0.603315	0.0773606	0.569709	0.0736031	0.569709	0.0734711			0.54837	0.0718353	0.558484	0.0736452	0.571847	0.0743327	0.570993	0.0743947	0.565636	0.0749613	0.56657	0.0739359	0.572054	0.0741478
1st Symbol-row	1			0.541363	0.0706749	0.556595	0.0723379	0.571977	0.0740035	0.587511	0.0756717	0.603199	0.0773425	0.572806	0.0739364	0.572806	0.0738039			0.547412	0.0715595	0.557408	0.0733454	0.570809	0.0740429	0.569895	0.0740872	0.564343	0.0746319	0.565365	0.0735972	0.571516	0.0739945
				0.5413	0.070657	0.55653	0.0723195	0.57191	0.0739847	0.587441	0.0756524	0.603127	0.0773227	0.575909	0.0742699	0.575909	0.0741367			0.5471	0.0713244	0.557055	0.0730821	0.570469	0.0737907	0.569536	0.0738199	0.563915	0.0743334	0.564974	0.0733304	0.571341	0.0738626
				0.541279	0.0706383	0.556508	0.0723004	0.571887	0.0739651	0.587418	0.0756324	0.603103	0.0773023	0.579018	0.0746034	0.579018	0.0744696			0.547444	0.0711389	0.557438	0.0728653	0.57084	0.073586	0.569928	0.0736033	0.564369	0.0740771	0.56541	0.0731457	0.571533	0.0737572
				0.5413	0.0706196	0.55653	0.0722813	0.57191	0.0739455	0.587441	0.0756123	0.603127	0.0772818	0.582134	0.0749371	0.582134	0.0748027			0.548432	0.0710103	0.558544	0.0727035	0.571906	0.0734365	0.571057	0.0734455	0.565688	0.073873	0.566658	0.0730504	0.572087	0.0736822
				0.541363	0.0706017	0.556595	0.0722629	0.571977	0.0739267	0.587511	0.0755931	0.603199	0.0772621	0.585255	0.0752709	0.585255	0.0751358			0.550026	0.0709434	0.560328	0.0726028	0.573628	0.073348	0.572879	0.0733527	0.56782	0.0737288	0.568669	0.073048	0.572981	0.0736405
				0.541466	0.0705851	0.556701	0.0722459	0.572087	0.0739093	0.587624	0.0755753	0.603315	0.0772439	0.588383	0.0756047	0.588383	0.0754691			0.552164	0.0709409	0.562724	0.0725671	0.575939	0.0733239	0.575324	0.0733284	0.570684	0.0736501	0.571366	0.0731386	0.57418	0.0736338
				0.541605	0.0705706	0.556844	0.0722311	0.572234	0.0738941	0.587776	0.0755598	0.603472	0.077228	0.591516	0.0759387	0.591516	0.0758024			0.554765	0.0710027	0.565638	0.0725977	0.578749	0.0733652	0.578299	0.0733736	0.57417	0.0736399	0.574645	0.0733187	0.575639	0.0736623
				0.541773	0.0705587	0.557018	0.0722189	0.572414	0.0738817	0.587962	0.075547	0.603664	0.0772149	0.594656	0.0762728	0.594656	0.0761359			0.557727	0.0711266	0.568959	0.0726936	0.581952	0.0734702	0.581688	0.0734866	0.578144	0.0736986	0.578381	0.0735815	0.577301	0.073725
				0.541966	0.0705499	0.557217	0.0722098	0.572619	0.0738724	0.588174	0.0755375	0.603882	0.0772052	0.597803	0.076607	0.597803	0.0764695			0.560939	0.0713078	0.572559	0.0728509	0.585424	0.0736349	0.585363	0.0736629	0.582452	0.0738241	0.582429	0.0739168	0.579103	0.0738193
				0.542174	0.0705444	0.557432	0.0722043	0.572842	0.0738667	0.588403	0.0755317	0.604119	0.0771992	0.600955	0.0769413	0.600955	0.0768031			0.564275	0.0715393	0.5763	0.0730637	0.589032	0.073853	0.58918	0.0738959	0.586931	0.0740113	0.586635	0.0743118	0.580975	0.0739417
				0.542391	0.0705426	0.557657	0.0722024	0.573073	0.0738647	0.588642	0.0755297	0.604365	0.0771972	0.604113	0.0772757	0.604113	0.0771369			0.567609	0.0718122	0.580037	0.0733239	0.592636	0.0741162	0.592995	0.0741765	0.591406	0.0742532	0.590836	0.0747512	0.582845	0.0740875
				0.542608	0.0705444	0.557881	0.0722043	0.573304	0.0738667	0.588881	0.0755317	0.604611	0.0771992	0.607278	0.0776101	0.607278	0.0774708			0.570811	0.0721161	0.583629	0.0736212	0.596099	0.0744142	0.59666	0.0744939	0.595707	0.0745404	0.594871	0.0752182	0.584642	0.0742511
				0.542817	0.0705499	0.558096	0.0722098	0.573527	0.0738724	0.58911	0.0755375	0.604848	0.0772052	0.610449	0.0779447	0.610449	0.0778047			0.573759	0.0724392	0.586935	0.0739445	0.599288	0.0747356	0.600034	0.0748361	0.599668	0.074862	0.598586	0.0756948	0.586296	0.0744262
				0.543009	0.0705587	0.558295	0.0722189	0.573732	0.0738817	0.589322	0.075547	0.605066	0.0772149	0.613627	0.0782794	0.613627	0.0781388			0.576339	0.0727691	0.58983	0.0742812	0.602079	0.0750681	0.602988	0.0751898	0.603137	0.0752055	0.601836	0.0761627	0.587744	0.074606
				0.543178	0.0705706	0.558469	0.0722311	0.573912	0.0738941	0.589507	0.0755598	0.605258	0.077228	0.61681	0.0786143	0.61681	0.078473			0.578453	0.0730932	0.592202	0.0746184	0.604366	0.075399	0.605408	0.0755414	0.60598	0.0755578	0.604499	0.076604	0.58893	0.0747837
				0.543316	0.0705851	0.558612	0.0722459	0.574059	0.0739093	0.58966	0.0755753	0.605415	0.0772439	0.62	0.0789492	0.62	0.0788073			0.580018	0.073399	0.593959	0.0749431	0.606061	0.0757154	0.607201	0.0758775	0.608089	0.0759053	0.60647	0.0770016	0.589808	0.0749524
				0.543419	0.0706017	0.558718	0.0722629	0.574169	0.0739267	0.589773	0.0755931	0.605531	0.0772621	0.62	0.0789492	0.62	0.0788073			0.580976	0.0736748	0.595036	0.0752429	0.607098	0.0760052	0.608299	0.076185	0.609382	0.0762346	0.607674	0.0773403	0.590346	0.0751057
				0.543482	0.0706196	0.558784	0.0722813	0.574236	0.0739455	0.589842	0.0756123	0.605603	0.0772818	IsoLine	IsoLine	0.62	0.079			0.581288	0.0739099	0.595389	0.0755062	0.607438	0.0762574	0.608658	0.0764523	0.60981	0.0765331	0.608066	0.0776071	0.590522	0.0752376
				0.543504	0.0706383	0.558806	0.0723004	0.574259	0.0739651	0.589866	0.0756324	0.605627	0.0773023			0.619135	0.079			ErrEll	ErrEll	ErrEll	ErrEll	ErrEll	ErrEll	ErrEll	ErrEll	ErrEll	ErrEll	ErrEll	ErrEll	ErrEll	ErrEll
				ConcTikEll	ConcTikEll	ConcTikEll	ConcTikEll	ConcTikEll	ConcTikEll	ConcTikEll	ConcTikEll	ConcTikEll	ConcTikEll			0.61681	0.0787555
																0.613627	0.0784201
																0.610449	0.0780847
																0.607278	0.0777495
																0.604113	0.0774144
																0.600955	0.0770794
																0.597803	0.0767445
																0.594656	0.0764097
																0.591516	0.076075
																0.588383	0.0757404
																0.585255	0.0754059
																0.582134	0.0750715
																0.579018	0.0747372
																0.575909	0.0744031
																0.572806	0.074069
																0.569709	0.073735
																0.566619	0.0734011
																0.563534	0.0730674
																0.560455	0.0727337
																0.557383	0.0724002
																0.554316	0.0720667
																0.551255	0.0717334
																0.548201	0.0714001
																0.545153	0.071067
																0.54211	0.0707339
																0.539074	0.070401
																0.536043	0.0700682
																0.533019	0.0697354
																0.53	0.0694028
																0.53	0.0694028
																0.53	0.0691549
																ConcBand	ConcBand

## Sheet: PlotDat3
Source sheet	all data	0.606449	0.0762828	0.536563	0.07	0.527276	0.0689787	0.633105	0.0776495	0.633975	0.0781877	0.633121	0.0789473	0.637361	0.0795554	0.638318	0.0790206	0.635862	0.0787257	0.640604	0.0794037	0.632214	0.0789996	0.632412	0.0794671	0.63562	0.0792231	0.632405	0.0802732	0.643106	0.0800772	0.650117	0.0791955	0.645023	0.0799191	0.648998	0.0801233	0.641675	0.079756	0.638628	0.0803192	0.646265	0.0807491	0.662184	0.0810571	0.648843	0.0805911	0.650633	0.0804941
Plot name	Concordia2	0.607504	0.0766413	0.536563	0.07	0.542391	0.0706383	0.632576	0.0779436	0.633448	0.0784817	0.632613	0.0792083	0.636869	0.0797493	0.637886	0.0792332	0.635271	0.0790559	0.640095	0.0796624	0.631733	0.0792664	0.631931	0.079728	0.63515	0.0794859	0.631947	0.0804444	0.642495	0.0804097	0.649448	0.0795434	0.644412	0.0802614	0.648369	0.0804744	0.641196	0.0800239	0.63813	0.0805769	0.645741	0.080999	0.661489	0.0814239	0.64819	0.0809595	0.650141	0.0807636
Plot Type	1	0.607924	0.0769479	0.544043	0.0708188	0.557657	0.0723004	0.631044	0.0781739	0.631923	0.0787049	0.631156	0.0793824	0.635459	0.0798423	0.636649	0.0793698	0.633553	0.0793204	0.638634	0.0798338	0.630346	0.0794621	0.630551	0.0799125	0.633795	0.0796835	0.630635	0.080518	0.640739	0.0806471	0.647494	0.0798347	0.642649	0.0805206	0.646553	0.0807387	0.639811	0.080226	0.636702	0.0807488	0.644242	0.0811521	0.659491	0.08168	0.646301	0.0812399	0.648721	0.0809601
1st free col	111	0.613	0.0771238	0.551559	0.0716381	0.573073	0.0739651	0.628566	0.0783316	0.62946	0.0788488	0.628807	0.079463	0.633187	0.0798308	0.634654	0.0794252	0.630775	0.0795092	0.636278	0.0799114	0.628106	0.0795792	0.628323	0.0800137	0.631605	0.0798085	0.628521	0.0804912	0.637905	0.0807802	0.644328	0.0800582	0.6398	0.0806866	0.643618	0.0809061	0.637575	0.0803544	0.634399	0.0808281	0.641825	0.0812024	0.656266	0.0818156	0.643251	0.0814212	0.64643	0.0810762
Sigma Level	1	0.616922	0.0772553	0.559112	0.0724581	0.588642	0.0756324	0.625238	0.0784105	0.626154	0.0789079	0.625655	0.0794469	0.630139	0.0797152	0.631977	0.0793971	0.627042	0.0796148	0.633117	0.0798922	0.625101	0.0796133	0.625335	0.0800275	0.628666	0.079856	0.625685	0.080365	0.634101	0.0808041	0.640073	0.0802053	0.635976	0.0807531	0.639679	0.0809701	0.634573	0.0804043	0.63131	0.080812	0.638582	0.0811481	0.651939	0.0818254	0.639155	0.0814967	0.643354	0.0811074
Absolute Errs	FALSE	0.605952	0.0773472	0.566702	0.0732788	0.604365	0.0773023	0.621188	0.0784076	0.62213	0.0788799	0.621821	0.0793348	0.626432	0.0795001	0.628722	0.0792868	0.622499	0.0796333	0.629273	0.079777	0.621445	0.0795629	0.621699	0.0799536	0.62509	0.0798241	0.622236	0.0801444	0.629475	0.0807177	0.634891	0.0802704	0.631323	0.0807176	0.634887	0.0809283	0.63092	0.0803737	0.627553	0.0807009	0.634639	0.0809913	0.646675	0.0817092	0.634173	0.0814633	0.639612	0.0810525
Symbol Type	1	0.615337	0.0773922	0.574328	0.0741	0.620244	0.0789747	0.616572	0.0783231	0.617545	0.0787659	0.617454	0.0791309	0.622209	0.0791937	0.625013	0.0790984	0.61732	0.0795639	0.624894	0.0795701	0.617279	0.0794302	0.617557	0.0797947	0.621014	0.0797142	0.618308	0.0798377	0.624203	0.0805244	0.628983	0.080251	0.626021	0.0805813	0.629425	0.0807824	0.626757	0.0802639	0.623273	0.0804992	0.630147	0.0807379	0.640678	0.0814712	0.628494	0.0813225	0.635348	0.0809135
Inverse Plot	FALSE	0.60817	0.0774176	0.581992	0.0749219	0.636279	0.0806498	0.611567	0.0781602	0.612573	0.0785702	0.61272	0.0788432	0.617632	0.0788078	0.620993	0.0788391	0.611705	0.0794094	0.620147	0.0792795	0.612762	0.0792201	0.613068	0.0795569	0.616596	0.0795304	0.61405	0.0794567	0.618489	0.0802316	0.622575	0.0801477	0.620272	0.0803496	0.623504	0.0805378	0.622244	0.0800789	0.618634	0.0802146	0.625279	0.0803977	0.634177	0.0811208	0.622337	0.0810795	0.630726	0.0806959
Color Plot	TRUE	0.608511	0.0777425	0.589693	0.0757445	0.652474	0.0823274	0.606365	0.0779251	0.607407	0.0783004	0.607802	0.0784826	0.612877	0.0783571	0.616817	0.078519	0.605868	0.0791756	0.615215	0.0789163	0.60807	0.0789407	0.608403	0.0792494	0.612005	0.0792798	0.609626	0.0790162	0.612552	0.0798505	0.615913	0.0799647	0.614298	0.0800313	0.617351	0.0802041	0.617554	0.079826	0.613815	0.079858	0.620221	0.0799838	0.627422	0.0806713	0.61594	0.0807437	0.625924	0.080408
3D plot	FALSE	0.612096	0.077792	0.597432	0.0765676	0.668829	0.0840077	0.601166	0.0776269	0.602245	0.0779668	0.602889	0.0780631	0.608127	0.077859	0.612645	0.0781503	0.600034	0.0788715	0.610288	0.0784946	0.603381	0.0786028	0.603742	0.078884	0.607417	0.078972	0.605207	0.0785329	0.60662	0.0793959	0.609254	0.0797089	0.608329	0.0796386	0.611202	0.079794	0.612868	0.0795149	0.609	0.0794432	0.615169	0.0795121	0.620674	0.08014	0.609547	0.080328	0.621125	0.0800608
Linear	FALSE	0.609742	0.0779055	0.605208	0.0773914	0.685345	0.0856906	0.59617	0.0772771	0.597285	0.0775823	0.598169	0.0776006	0.603564	0.0773327	0.608637	0.0777473	0.594428	0.0785089	0.605555	0.0780305	0.598876	0.0782193	0.599265	0.0784747	0.60301	0.0786189	0.600962	0.0780255	0.600922	0.0788852	0.602853	0.0793901	0.602593	0.0791868	0.605295	0.0793233	0.608366	0.0791575	0.604375	0.0789861	0.610316	0.0790007	0.61419	0.0795474	0.603404	0.0798485	0.616514	0.0796677
Data Range	AC10:AG60	0.612687	0.0779355	0.613022	0.0782158	0.702025	0.087376	0.59157	0.0768891	0.592717	0.0771617	0.593824	0.0771132	0.599364	0.0767983	0.604948	0.0773253	0.589265	0.0781016	0.601198	0.0775419	0.594728	0.0778051	0.595143	0.0780373	0.598951	0.078234	0.597055	0.0775136	0.595675	0.0783379	0.596956	0.0790206	0.597312	0.078693	0.599855	0.07881	0.60422	0.0787675	0.600117	0.0785043	0.605848	0.0784692	0.608222	0.0789161	0.597748	0.0793234	0.612269	0.0792438
Filled Symbols	TRUE	0.615976	0.0780708	0.620874	0.0790408	0.718871	0.0890642	0.587541	0.0764777	0.588718	0.076721	0.590021	0.0766193	0.595687	0.0762765	0.601719	0.0769006	0.584743	0.0776653	0.597384	0.0770476	0.591097	0.0773759	0.591534	0.0775885	0.595397	0.0778321	0.593635	0.0770167	0.591082	0.0777752	0.59179	0.0786146	0.592688	0.0781764	0.595092	0.078274	0.60059	0.0783599	0.59639	0.0780162	0.601938	0.0779382	0.602996	0.0782706	0.592795	0.0787731	0.608553	0.0788054
ConcAge	FALSE	0.614413	0.0780971	0.628764	0.0798665	0.735883	0.0907549	0.584239	0.0760589	0.585441	0.0762773	0.586906	0.0761381	0.592676	0.0757872	0.599074	0.0764895	0.581036	0.0772168	0.59426	0.0765665	0.588122	0.0769483	0.588579	0.0771457	0.592486	0.0774287	0.590834	0.0765539	0.58732	0.0772187	0.587554	0.0781877	0.588898	0.0776567	0.59119	0.0777358	0.597615	0.0779505	0.593338	0.0775407	0.598735	0.0774279	0.598716	0.0776356	0.588737	0.0782186	0.605508	0.0783693
ConcSwap	FALSE	0.617471	0.0782169	0.636693	0.0806928	0.753063	0.0924482	0.58179	0.0756487	0.583011	0.0758476	0.584599	0.075688	0.590447	0.0753493	0.597114	0.0761079	0.578286	0.0767733	0.591946	0.0761171	0.585917	0.0765388	0.586389	0.0767258	0.590327	0.0770392	0.58876	0.0761431	0.584532	0.0766897	0.58441	0.0777563	0.58609	0.077154	0.588297	0.077216	0.59541	0.0775549	0.591077	0.077096	0.596364	0.0769581	0.595545	0.0770354	0.585729	0.0776813	0.603252	0.0779524
1st Symbol-row	1	0.617646	0.0783104	0.644661	0.0815197	IsoLine	IsoLine	0.580289	0.0752628	0.581523	0.0754483	0.583188	0.0752863	0.589083	0.0749796	0.595916	0.0757704	0.5766	0.0763518	0.590531	0.0757167	0.584568	0.0761631	0.585049	0.076345	0.589006	0.0766787	0.587492	0.0758	0.582826	0.0762085	0.582479	0.0773371	0.584369	0.0766874	0.586525	0.0767348	0.59406	0.0771883	0.589695	0.0766991	0.594914	0.0765467	0.593604	0.0764932	0.583886	0.0771818	0.601871	0.0775705
		0.613936	0.0783423	0.652667	0.0823473			0.579793	0.0749161	0.581033	0.0750949	0.582727	0.0749485	0.588639	0.0746923	0.595526	0.0754899	0.576042	0.0759687	0.590069	0.0753807	0.584126	0.0758355	0.584611	0.0760178	0.588571	0.0763609	0.587079	0.0755379	0.582268	0.0757938	0.581835	0.076946	0.583804	0.0762751	0.585943	0.0763104	0.593616	0.0768648	0.589244	0.0763655	0.594442	0.0762096	0.592969	0.0760298	0.58328	0.0767393	0.601418	0.0772385
		0.620353	0.0784793	0.660712	0.0831755			0.580322	0.074622	0.581561	0.074801	0.583235	0.0746875	0.589131	0.0744984	0.595957	0.0752773	0.576633	0.0756384	0.590578	0.075122	0.584607	0.0755688	0.585091	0.075757	0.589041	0.0760982	0.587537	0.0753667	0.582879	0.0754613	0.582503	0.0765981	0.584414	0.0759328	0.586572	0.0759594	0.594096	0.0765969	0.589742	0.0761077	0.594965	0.0759597	0.593665	0.075663	0.583934	0.0763708	0.60191	0.076969
		0.627577	0.0785434	0.668796	0.0840044			0.581854	0.0743917	0.583085	0.0745777	0.584692	0.0745134	0.590541	0.0744054	0.597194	0.0751407	0.578351	0.0753739	0.592039	0.0749505	0.585994	0.0753731	0.586472	0.0755724	0.590397	0.0759005	0.588849	0.0752931	0.584635	0.075224	0.584458	0.0763068	0.586178	0.0756736	0.588389	0.0756951	0.59548	0.0763949	0.59117	0.0759359	0.596465	0.0758066	0.595663	0.0754068	0.585822	0.0760905	0.60333	0.0767724
		0.616062	0.0786652	0.67692	0.0848338			0.584332	0.074234	0.585548	0.0744338	0.587041	0.0744328	0.592813	0.0744169	0.599189	0.0750853	0.581129	0.0751852	0.594395	0.0748729	0.588233	0.0752559	0.588699	0.0754713	0.592586	0.0757756	0.590963	0.0753199	0.587469	0.0750908	0.587623	0.0760833	0.589026	0.0755076	0.591323	0.0755277	0.597716	0.0762665	0.593473	0.0758565	0.598882	0.0757563	0.598888	0.0752713	0.588873	0.0759092	0.605622	0.0766563
		0.626026	0.0788663	0.685083	0.0856639			0.58766	0.0741551	0.588855	0.0743747	0.590193	0.0744489	0.595861	0.0745324	0.601866	0.0751134	0.584862	0.0750795	0.597556	0.0748921	0.591239	0.0752219	0.591688	0.0754574	0.595525	0.0757281	0.593799	0.075446	0.591273	0.0750669	0.591879	0.0759362	0.59285	0.0754411	0.595262	0.0754637	0.600719	0.0762166	0.596562	0.0758727	0.602124	0.0758106	0.603215	0.0752614	0.592968	0.0758337	0.608697	0.0766251
		0.622418	0.0789869	0.693286	0.0864947			0.59171	0.074158	0.592878	0.0744027	0.594027	0.074561	0.599568	0.0747475	0.605121	0.0752237	0.589405	0.075061	0.6014	0.0750074	0.594895	0.0752722	0.595323	0.0755314	0.599101	0.0757599	0.597248	0.0756667	0.595899	0.0751533	0.59706	0.0758711	0.597503	0.0754767	0.600055	0.0755054	0.604371	0.0762471	0.600319	0.0759838	0.606067	0.0759674	0.608479	0.0753777	0.597951	0.075867	0.612439	0.0766801
		0.630702	0.0791442	0.701529	0.087326			0.596326	0.0742425	0.597464	0.0745167	0.598394	0.0747648	0.603791	0.0750539	0.60883	0.0754121	0.594584	0.0751304	0.605779	0.0752143	0.599061	0.0754049	0.599466	0.0756903	0.603177	0.0758698	0.601177	0.0759734	0.601171	0.0753466	0.602968	0.0758905	0.602806	0.0756129	0.605517	0.0756514	0.608534	0.076357	0.604599	0.0761855	0.610559	0.0762208	0.614476	0.0756157	0.60363	0.0760079	0.616703	0.076819
		0.627837	0.0794074	0.709812	0.0881581			0.601331	0.0744054	0.602435	0.0747124	0.603128	0.0750526	0.608368	0.0754399	0.61285	0.0756714	0.600199	0.0752849	0.610526	0.0755049	0.603577	0.0756151	0.603955	0.075928	0.607595	0.0760536	0.605435	0.0763543	0.606885	0.0756394	0.609376	0.0759938	0.608555	0.0758447	0.611438	0.0758959	0.613047	0.076542	0.609238	0.0764701	0.615427	0.076561	0.620977	0.0759661	0.609786	0.0762509	0.621325	0.0770367
		0.627445	0.0794482	0.718135	0.0889907			0.606533	0.0746405	0.607601	0.0749822	0.608046	0.0754131	0.613123	0.0758906	0.617026	0.0759915	0.606036	0.0755187	0.615458	0.075868	0.60827	0.0758944	0.60862	0.0762356	0.612186	0.0763042	0.609858	0.0767949	0.612822	0.0760205	0.616038	0.0761768	0.614528	0.0761629	0.617591	0.0762297	0.617737	0.0767949	0.614057	0.0768266	0.620485	0.0769749	0.627731	0.0764156	0.616184	0.0765867	0.626128	0.0773246
		0.628419	0.0796324	0.726499	0.089824			0.611732	0.0749387	0.612764	0.0753158	0.612959	0.0758327	0.617873	0.0763886	0.621198	0.0763602	0.61187	0.0758228	0.620385	0.0762897	0.612959	0.0762323	0.613281	0.076601	0.616774	0.076612	0.614277	0.0772781	0.618754	0.0764751	0.622697	0.0764326	0.620498	0.0765556	0.623739	0.0766398	0.622423	0.077106	0.618872	0.0772414	0.625538	0.0774466	0.63448	0.0769469	0.622577	0.0770024	0.630926	0.0776718
		0.634064	0.0799752	0.734903	0.0906579			0.616728	0.0752885	0.617724	0.0757003	0.617679	0.0762951	0.622436	0.076915	0.625206	0.0767633	0.617476	0.0761855	0.625118	0.0767538	0.617464	0.0766158	0.617758	0.0770103	0.621182	0.0769651	0.618522	0.0777855	0.624453	0.0769859	0.629098	0.0767514	0.626234	0.0770074	0.629647	0.0771105	0.626926	0.0774634	0.623497	0.0776985	0.630391	0.077958	0.640963	0.0775395	0.62872	0.0774819	0.635537	0.0780649
		0.63402	0.0804063	0.743349	0.0914925			0.621328	0.0756765	0.622291	0.076121	0.622024	0.0767826	0.626636	0.0774493	0.628895	0.0771853	0.622639	0.0765927	0.629475	0.0772424	0.621611	0.0770301	0.62188	0.0774477	0.62524	0.07735	0.622429	0.0782975	0.629699	0.0775331	0.634995	0.0771209	0.631515	0.0775012	0.635087	0.0776237	0.631072	0.0778534	0.627755	0.0781804	0.634858	0.0784894	0.646932	0.0781707	0.634376	0.0780069	0.639782	0.0784888
		0.645584	0.0806174	0.751835	0.0923277			0.625357	0.0760879	0.626291	0.0765616	0.625827	0.0772765	0.630313	0.0779712	0.632125	0.0776099	0.627161	0.077029	0.633289	0.0777368	0.625243	0.0774592	0.625488	0.0778964	0.628794	0.0777519	0.625849	0.0787944	0.634292	0.0780958	0.640161	0.0775269	0.636139	0.0780178	0.639849	0.0781598	0.634702	0.078261	0.631482	0.0786684	0.638769	0.0790205	0.652157	0.0788162	0.639328	0.0785573	0.643498	0.0789272
		0.647543	0.0817098	0.760363	0.0931635			0.628659	0.0765067	0.629568	0.0770053	0.628942	0.0777577	0.633324	0.0784604	0.63477	0.078021	0.630868	0.0774775	0.636413	0.0782179	0.628218	0.0778868	0.628444	0.0783393	0.631706	0.0781554	0.62865	0.0792571	0.638055	0.0786524	0.644397	0.0779538	0.639928	0.0785375	0.643752	0.078698	0.637676	0.0786704	0.634534	0.079144	0.641971	0.0795307	0.656438	0.0794513	0.643386	0.0791117	0.646543	0.0793632
		0.64649	0.0817263	0.768933	0.094			0.631108	0.076917	0.631997	0.0774351	0.63125	0.0782078	0.635554	0.0788984	0.636729	0.0784026	0.633618	0.077921	0.638727	0.0786673	0.630422	0.0782963	0.630634	0.0787592	0.633864	0.0785448	0.630724	0.0796679	0.640842	0.0791814	0.647542	0.0783852	0.642737	0.0790403	0.646645	0.0792177	0.639881	0.079066	0.636795	0.0795887	0.644343	0.0800006	0.659609	0.0800514	0.646395	0.0796491	0.648799	0.0797802
		0.646658	0.0817919	0.768933	0.094			0.632609	0.0773028	0.633486	0.0778343	0.632661	0.0786095	0.636917	0.0792681	0.637927	0.0787401	0.635304	0.0783425	0.640142	0.0790677	0.631772	0.0786721	0.631974	0.07914	0.635186	0.0789054	0.631992	0.080011	0.642548	0.0796625	0.649473	0.0788044	0.644457	0.0795068	0.648416	0.079699	0.641231	0.0794326	0.638177	0.0799855	0.645793	0.080412	0.661549	0.0805937	0.648237	0.0801486	0.650181	0.080162
		0.661657	0.0819092	IsoLine	IsoLine			0.633105	0.0776495	0.633975	0.0781877	0.633121	0.0789473	0.637361	0.0795554	0.638318	0.0790206	0.635862	0.0787257	0.640604	0.0794037	0.632214	0.0789996	0.632412	0.0794671	0.63562	0.0792231	0.632405	0.0802732	0.643106	0.0800772	0.650117	0.0791955	0.645023	0.0799191	0.648998	0.0801233	0.641675	0.079756	0.638628	0.0803192	0.646265	0.0807491	0.662184	0.0810571	0.648843	0.0805911	0.650633	0.0804941
		0.653236	0.0819218					ErrEll	ErrEll	ErrEll	ErrEll	ErrEll	ErrEll	ErrEll	ErrEll	ErrEll	ErrEll	ErrEll	ErrEll	ErrEll	ErrEll	ErrEll	ErrEll	ErrEll	ErrEll	ErrEll	ErrEll	ErrEll	ErrEll	ErrEll	ErrEll	ErrEll	ErrEll	ErrEll	ErrEll	ErrEll	ErrEll	ErrEll	ErrEll	ErrEll	ErrEll	ErrEll	ErrEll	ErrEll	ErrEll	ErrEll	ErrEll	ErrEll	ErrEll
		0.656229	0.0820284
		0.651219	0.0821861
		0.652552	0.0824019
		0.668779	0.0826545
		0.659897	0.0830805
		0.668328	0.0831099
		0.663455	0.083142
		0.675225	0.0832628
		0.679818	0.0837389
		0.677983	0.0842402
		0.672795	0.0842439
		0.673232	0.084301
		0.67391	0.0858375
		0.695152	0.0860132
		0.692123	0.0861469
		0.70755	0.0863071
		0.693081	0.0864143
		IsoLine	IsoLine
[truncated: 60 more columns]

## Sheet: PlotDat2
Source sheet	all data	0.606449	0.0762828	450		460		470		480		490		500		510		0.554888	0.072	0.556079	0.072	0.542391	0.0706383	0.633105	0.0776495	0.633975	0.0781877	0.633121	0.0789473	0.637361	0.0795554	0.638318	0.0790206	0.621067	0.0776441
Plot name	Concordia3	0.607504	0.0766413	0.558806	0.0723004	0.574259	0.0739651	0.589866	0.0756324	0.605627	0.0773023	0.621545	0.0789747	0.637621	0.0806498	0.653855	0.0823274	0.554888	0.072	0.558367	0.0722478	0.557657	0.0723004	0.632576	0.0779436	0.633448	0.0784817	0.632613	0.0792083	0.636869	0.0797493	0.637886	0.0792332	0.620854	0.0777531
Plot Type	1	0.607924	0.0769479	0.558784	0.0723195	0.574236	0.0739847	0.589842	0.0756524	0.605603	0.0773227	0.62152	0.0789957	0.637595	0.0806712	0.653829	0.0823493	0.558367	0.0723774	0.561854	0.0726246	0.573073	0.0739651	0.631044	0.0781739	0.631923	0.0787049	0.631156	0.0793824	0.635459	0.0798423	0.636649	0.0793698	0.620245	0.0778262
1st free col	37	0.613	0.0771238	0.558718	0.0723379	0.574169	0.0740035	0.589773	0.0756717	0.605531	0.0773425	0.621446	0.0790158	0.637518	0.0806918	0.65375	0.0823703	0.561854	0.072755	0.565349	0.0730017	0.588642	0.0756324	0.628566	0.0783316	0.62946	0.0788488	0.628807	0.079463	0.633187	0.0798308	0.634654	0.0794252	0.619262	0.0778607
Sigma Level	1	0.616922	0.0772553	0.558612	0.0723549	0.574059	0.0740209	0.58966	0.0756894	0.605415	0.0773606	0.621326	0.0790344	0.637395	0.0807108	0.653623	0.0823897	0.565349	0.0731327	0.568851	0.0733788	0.604365	0.0773023	0.625238	0.0784105	0.626154	0.0789079	0.625655	0.0794469	0.630139	0.0797152	0.631977	0.0793971	0.617944	0.0778551
Absolute Errs	FALSE	IsoLine	IsoLine	0.558469	0.0723697	0.573912	0.0740361	0.589507	0.075705	0.605258	0.0773765	0.621164	0.0790507	0.637228	0.0807274	0.653451	0.0824067	0.568851	0.0735106	0.572361	0.0737561	0.620244	0.0789747	0.621188	0.0784076	0.62213	0.0788799	0.621821	0.0793348	0.626432	0.0795001	0.628722	0.0792868	0.61634	0.0778098
Symbol Type	1			0.558295	0.0723819	0.573732	0.0740485	0.589322	0.0757178	0.605066	0.0773896	0.620967	0.079064	0.637024	0.080741	0.653241	0.0824207	0.572361	0.0738885	0.575879	0.0741335	0.636279	0.0806498	0.616572	0.0783231	0.617545	0.0787659	0.617454	0.0791309	0.622209	0.0791937	0.625013	0.0790984	0.614513	0.0777263
Inverse Plot	FALSE			0.558096	0.072391	0.573527	0.0740578	0.58911	0.0757273	0.604848	0.0773993	0.620742	0.0790739	0.636793	0.0807512	0.653003	0.082431	0.575879	0.0742667	0.579405	0.074511	0.652474	0.0823274	0.611567	0.0781602	0.612573	0.0785702	0.61272	0.0788432	0.617632	0.0788078	0.620993	0.0788391	0.612533	0.077608
Color Plot	TRUE			0.557881	0.0723965	0.573304	0.0740635	0.588881	0.0757331	0.604611	0.0774053	0.620497	0.0790801	0.636541	0.0807574	0.652743	0.0824374	0.579405	0.0746449	0.582939	0.0748887	IsoLine	IsoLine	0.606365	0.0779251	0.607407	0.0783004	0.607802	0.0784826	0.612877	0.0783571	0.616817	0.078519	0.610475	0.0774595
3D plot	FALSE			0.557657	0.0723984	0.573073	0.0740655	0.588642	0.0757351	0.604365	0.0774073	0.620244	0.0790821	0.636279	0.0807595	0.652474	0.0824396	0.582939	0.0750233	0.586481	0.0752665			0.601166	0.0776269	0.602245	0.0779668	0.602889	0.0780631	0.608127	0.077859	0.612645	0.0781503	0.60842	0.0772863
Linear	FALSE			0.557432	0.0723965	0.572842	0.0740635	0.588403	0.0757331	0.604119	0.0774053	0.61999	0.0790801	0.636018	0.0807574	0.652204	0.0824374	0.586481	0.0754018	0.590031	0.0756444			0.59617	0.0772771	0.597285	0.0775823	0.598169	0.0776006	0.603564	0.0773327	0.608637	0.0777473	0.606445	0.0770951
Data Range	AC10:AG14			0.557217	0.072391	0.572619	0.0740578	0.588174	0.0757273	0.603882	0.0773993	0.619746	0.0790739	0.635766	0.0807512	0.651945	0.082431	0.590031	0.0757804	0.593588	0.0760225			0.59157	0.0768891	0.592717	0.0771617	0.593824	0.0771132	0.599364	0.0767983	0.604948	0.0773253	0.604627	0.0768934
Filled Symbols	TRUE			0.557018	0.0723819	0.572414	0.0740485	0.587962	0.0757178	0.603664	0.0773896	0.619521	0.079064	0.635534	0.080741	0.651706	0.0824207	0.593588	0.0761592	0.597154	0.0764007			0.587541	0.0764777	0.588718	0.076721	0.590021	0.0766193	0.595687	0.0762765	0.601719	0.0769006	0.603036	0.0766888
ConcAge	TRUE			0.556844	0.0723697	0.572234	0.0740361	0.587776	0.075705	0.603472	0.0773765	0.619323	0.0790507	0.635331	0.0807274	0.651497	0.0824067	0.597154	0.0765381	0.600727	0.0767791			0.584239	0.0760589	0.585441	0.0762773	0.586906	0.0761381	0.592676	0.0757872	0.599074	0.0764895	0.601732	0.0764893
ConcSwap	FALSE			0.556701	0.0723549	0.572087	0.0740209	0.587624	0.0756894	0.603315	0.0773606	0.619161	0.0790344	0.635164	0.0807108	0.651325	0.0823897	0.600727	0.0769171	0.604309	0.0771575			0.58179	0.0756487	0.583011	0.0758476	0.584599	0.075688	0.590447	0.0753493	0.597114	0.0761079	0.600767	0.0763024
1st Symbol-row	1			0.556595	0.0723379	0.571977	0.0740035	0.587511	0.0756717	0.603199	0.0773425	0.619041	0.0790158	0.63504	0.0806918	0.651198	0.0823703	0.604309	0.0772963	0.607898	0.0775361			0.580289	0.0752628	0.581523	0.0754483	0.583188	0.0752863	0.589083	0.0749796	0.595916	0.0757704	0.600177	0.0761354
				0.55653	0.0723195	0.57191	0.0739847	0.587441	0.0756524	0.603127	0.0773227	0.618967	0.0789957	0.634964	0.0806712	0.651119	0.0823493	0.607898	0.0776756	0.611496	0.0779149			0.579793	0.0749161	0.581033	0.0750949	0.582727	0.0749485	0.588639	0.0746923	0.595526	0.0754899	0.599984	0.0759947
				0.556508	0.0723004	0.571887	0.0739651	0.587418	0.0756324	0.603103	0.0773023	0.618942	0.0789747	0.634938	0.0806498	0.651092	0.0823274	0.611496	0.0780551	0.615102	0.0782937			0.580322	0.074622	0.581561	0.074801	0.583235	0.0746875	0.589131	0.0744984	0.595957	0.0752773	0.600196	0.0758856
				0.55653	0.0722813	0.57191	0.0739455	0.587441	0.0756123	0.603127	0.0772818	0.618967	0.0789538	0.634964	0.0806284	0.651119	0.0823056	0.615102	0.0784347	0.618715	0.0786727			0.581854	0.0743917	0.583085	0.0745777	0.584692	0.0745134	0.590541	0.0744054	0.597194	0.0751407	0.600805	0.0758125
				0.556595	0.0722629	0.571977	0.0739267	0.587511	0.0755931	0.603199	0.0772621	0.619041	0.0789336	0.63504	0.0806078	0.651198	0.0822845	0.618715	0.0788144	0.622337	0.0790519			0.584332	0.074234	0.585548	0.0744338	0.587041	0.0744328	0.592813	0.0744169	0.599189	0.0750853	0.601788	0.075778
				0.556701	0.0722459	0.572087	0.0739093	0.587624	0.0755753	0.603315	0.0772439	0.619161	0.078915	0.635164	0.0805888	0.651325	0.0822651	0.622337	0.0791942	0.625967	0.0794311			0.58766	0.0741551	0.588855	0.0743747	0.590193	0.0744489	0.595861	0.0745324	0.601866	0.0751134	0.603107	0.0757836
				0.556844	0.0722311	0.572234	0.0738941	0.587776	0.0755598	0.603472	0.077228	0.619323	0.0788988	0.635331	0.0805722	0.651497	0.0822481	0.625967	0.0795742	0.629605	0.0798105			0.59171	0.074158	0.592878	0.0744027	0.594027	0.074561	0.599568	0.0747475	0.605121	0.0752237	0.60471	0.075829
				0.557018	0.0722189	0.572414	0.0738817	0.587962	0.075547	0.603664	0.0772149	0.619521	0.0788854	0.635534	0.0805585	0.651706	0.0822342	0.629605	0.0799543	0.633251	0.0801901			0.596326	0.0742425	0.597464	0.0745167	0.598394	0.0747648	0.603791	0.0750539	0.60883	0.0754121	0.606537	0.0759124
				0.557217	0.0722098	0.572619	0.0738724	0.588174	0.0755375	0.603882	0.0772052	0.619746	0.0788755	0.635766	0.0805484	0.651945	0.0822238	0.633251	0.0803345	0.636906	0.0805698			0.601331	0.0744054	0.602435	0.0747124	0.603128	0.0750526	0.608368	0.0754399	0.61285	0.0756714	0.608518	0.0760307
				0.557432	0.0722043	0.572842	0.0738667	0.588403	0.0755317	0.604119	0.0771992	0.61999	0.0788694	0.636018	0.0805421	0.652204	0.0822175	0.636906	0.0807149	0.640568	0.0809496			0.606533	0.0746405	0.607601	0.0749822	0.608046	0.0754131	0.613123	0.0758906	0.617026	0.0759915	0.610575	0.0761793
				0.557657	0.0722024	0.573073	0.0738647	0.588642	0.0755297	0.604365	0.0771972	0.620244	0.0788673	0.636279	0.08054	0.652474	0.0822153	0.640568	0.0810954	0.644239	0.0813295			0.611732	0.0749387	0.612764	0.0753158	0.612959	0.0758327	0.617873	0.0763886	0.621198	0.0763602	0.612631	0.0763525
				0.557881	0.0722043	0.573304	0.0738667	0.588881	0.0755317	0.604611	0.0771992	0.620497	0.0788694	0.636541	0.0805421	0.652743	0.0822175	0.644239	0.0814761	0.647918	0.0817096			0.616728	0.0752885	0.617724	0.0757003	0.617679	0.0762951	0.622436	0.076915	0.625206	0.0767633	0.614606	0.0765436
				0.558096	0.0722098	0.573527	0.0738724	0.58911	0.0755375	0.604848	0.0772052	0.620742	0.0788755	0.636793	0.0805484	0.653003	0.0822238	0.647918	0.0818569	0.651605	0.0820898			0.621328	0.0756765	0.622291	0.076121	0.622024	0.0767826	0.626636	0.0774493	0.628895	0.0771853	0.616423	0.0767453
				0.558295	0.0722189	0.573732	0.0738817	0.589322	0.075547	0.605066	0.0772149	0.620967	0.0788854	0.637024	0.0805585	0.653241	0.0822342	0.651605	0.0822378	0.6553	0.0824701			0.625357	0.0760879	0.626291	0.0765616	0.625827	0.0772765	0.630313	0.0779712	0.632125	0.0776099	0.618015	0.0769499
				0.558469	0.0722311	0.573912	0.0738941	0.589507	0.0755598	0.605258	0.077228	0.621164	0.0788988	0.637228	0.0805722	0.653451	0.0822481	0.6553	0.0826188	0.659004	0.0828506			0.628659	0.0765067	0.629568	0.0770053	0.628942	0.0777577	0.633324	0.0784604	0.63477	0.078021	0.619318	0.0771495
				0.558612	0.0722459	0.574059	0.0739093	0.58966	0.0755753	0.605415	0.0772439	0.621326	0.078915	0.637395	0.0805888	0.653623	0.0822651	0.659004	0.083	0.66	0.0829527			0.631108	0.076917	0.631997	0.0774351	0.63125	0.0782078	0.635554	0.0788984	0.636729	0.0784026	0.620283	0.0773363
				0.558718	0.0722629	0.574169	0.0739267	0.589773	0.0755931	0.605531	0.0772621	0.621446	0.0789336	0.637518	0.0806078	0.65375	0.0822845	0.659004	0.083	0.66	0.083			0.632609	0.0773028	0.633486	0.0778343	0.632661	0.0786095	0.636917	0.0792681	0.637927	0.0787401	0.620874	0.0775033
				0.558784	0.0722813	0.574236	0.0739455	0.589842	0.0756123	0.605603	0.0772818	0.62152	0.0789538	0.637595	0.0806284	0.653829	0.0823056	IsoLine	IsoLine	0.657555	0.083			0.633105	0.0776495	0.633975	0.0781877	0.633121	0.0789473	0.637361	0.0795554	0.638318	0.0790206	0.621067	0.0776441
				0.558806	0.0723004	0.574259	0.0739651	0.589866	0.0756324	0.605627	0.0773023	0.621545	0.0789747	0.637621	0.0806498	0.653855	0.0823274			0.6553	0.0827675			ErrEll	ErrEll	ErrEll	ErrEll	ErrEll	ErrEll	ErrEll	ErrEll	ErrEll	ErrEll	ErrEll	ErrEll
				ConcTikEll	ConcTikEll	ConcTikEll	ConcTikEll	ConcTikEll	ConcTikEll	ConcTikEll	ConcTikEll	ConcTikEll	ConcTikEll	ConcTikEll	ConcTikEll	ConcTikEll	ConcTikEll			0.651605	0.0823858
																				0.647918	0.0820042
																				0.644239	0.0816227
																				0.640568	0.0812413
																				0.636906	0.0808601
																				0.633251	0.080479
																				0.629605	0.080098
																				0.625967	0.0797172
																				0.622337	0.0793365
																				0.618715	0.078956
																				0.615102	0.0785756
																				0.611496	0.0781953
																				0.607898	0.0778151
																				0.604309	0.0774351
																				0.600727	0.0770552
																				0.597154	0.0766755
																				0.593588	0.0762959
																				0.590031	0.0759164
																				0.586481	0.0755371
																				0.582939	0.0751579
																				0.579405	0.0747788
																				0.575879	0.0743998
																				0.572361	0.074021
																				0.568851	0.0736423
																				0.565349	0.0732638
																				0.561854	0.0728854
																				0.558367	0.0725071
																				0.554888	0.072129
																				0.553704	0.072
																				0.556079	0.072
																				ConcBand	ConcBand

## Sheet: PlotDat4
Source sheet	all data	0.605952	0.0773472	450		460		470		480		490		500		510		520		0.554888	0.072	0.556079	0.072	0.542391	0.0706383	0.635862	0.0787257	0.640604	0.0794037	0.632214	0.0789996	0.632412	0.0794671	0.63562	0.0792231	0.632405	0.0802732	0.643106	0.0800772	0.650117	0.0791955	0.645023	0.0799191	0.648998	0.0801233	0.641675	0.079756	0.638628	0.0803192
Plot name	Concordia4	0.615337	0.0773922	0.558806	0.0723004	0.574259	0.0739651	0.589866	0.0756324	0.605627	0.0773023	0.621545	0.0789747	0.637621	0.0806498	0.653855	0.0823274	0.670251	0.0840077	0.554888	0.072	0.558997	0.0723159	0.557657	0.0723004	0.635271	0.0790559	0.640095	0.0796624	0.631733	0.0792664	0.631931	0.079728	0.63515	0.0794859	0.631947	0.0804444	0.642495	0.0804097	0.649448	0.0795434	0.644412	0.0802614	0.648369	0.0804744	0.641196	0.0800239	0.63813	0.0805769
Plot Type	1	0.60817	0.0774176	0.558784	0.0723195	0.574236	0.0739847	0.589842	0.0756524	0.605603	0.0773227	0.62152	0.0789957	0.637595	0.0806712	0.653829	0.0823493	0.670224	0.08403	0.558997	0.0724457	0.563116	0.0727609	0.573073	0.0739651	0.633553	0.0793204	0.638634	0.0798338	0.630346	0.0794621	0.630551	0.0799125	0.633795	0.0796835	0.630635	0.080518	0.640739	0.0806471	0.647494	0.0798347	0.642649	0.0805206	0.646553	0.0807387	0.639811	0.080226	0.636702	0.0807488
1st free col	63	0.608511	0.0777425	0.558718	0.0723379	0.574169	0.0740035	0.589773	0.0756717	0.605531	0.0773425	0.621446	0.0790158	0.637518	0.0806918	0.65375	0.0823703	0.670143	0.0840515	0.563116	0.0728915	0.567247	0.0732061	0.588642	0.0756324	0.630775	0.0795092	0.636278	0.0799114	0.628106	0.0795792	0.628323	0.0800137	0.631605	0.0798085	0.628521	0.0804912	0.637905	0.0807802	0.644328	0.0800582	0.6398	0.0806866	0.643618	0.0809061	0.637575	0.0803544	0.634399	0.0808281
Sigma Level	1	0.612096	0.077792	0.558612	0.0723549	0.574059	0.0740209	0.58966	0.0756894	0.605415	0.0773606	0.621326	0.0790344	0.637395	0.0807108	0.653623	0.0823897	0.670011	0.0840713	0.567247	0.0733376	0.571388	0.0736515	0.604365	0.0773023	0.627042	0.0796148	0.633117	0.0798922	0.625101	0.0796133	0.625335	0.0800275	0.628666	0.079856	0.625685	0.080365	0.634101	0.0808041	0.640073	0.0802053	0.635976	0.0807531	0.639679	0.0809701	0.634573	0.0804043	0.63131	0.080812
Absolute Errs	FALSE	0.609742	0.0779055	0.558469	0.0723697	0.573912	0.0740361	0.589507	0.075705	0.605258	0.0773765	0.621164	0.0790507	0.637228	0.0807274	0.653451	0.0824067	0.669835	0.0840887	0.571388	0.0737838	0.57554	0.0740971	0.620244	0.0789747	0.622499	0.0796333	0.629273	0.079777	0.621445	0.0795629	0.621699	0.0799536	0.62509	0.0798241	0.622236	0.0801444	0.629475	0.0807177	0.634891	0.0802704	0.631323	0.0807176	0.634887	0.0809283	0.63092	0.0803737	0.627553	0.0807009
Symbol Type	1	0.612687	0.0779355	0.558295	0.0723819	0.573732	0.0740485	0.589322	0.0757178	0.605066	0.0773896	0.620967	0.079064	0.637024	0.080741	0.653241	0.0824207	0.669619	0.0841029	0.57554	0.0742302	0.579703	0.0745429	0.636279	0.0806498	0.61732	0.0795639	0.624894	0.0795701	0.617279	0.0794302	0.617557	0.0797947	0.621014	0.0797142	0.618308	0.0798377	0.624203	0.0805244	0.628983	0.080251	0.626021	0.0805813	0.629425	0.0807824	0.626757	0.0802639	0.623273	0.0804992
Inverse Plot	FALSE	0.615976	0.0780708	0.558096	0.072391	0.573527	0.0740578	0.58911	0.0757273	0.604848	0.0773993	0.620742	0.0790739	0.636793	0.0807512	0.653003	0.082431	0.669373	0.0841135	0.579703	0.0746768	0.583877	0.0749888	0.652474	0.0823274	0.611705	0.0794094	0.620147	0.0792795	0.612762	0.0792201	0.613068	0.0795569	0.616596	0.0795304	0.61405	0.0794567	0.618489	0.0802316	0.622575	0.0801477	0.620272	0.0803496	0.623504	0.0805378	0.622244	0.0800789	0.618634	0.0802146
Color Plot	TRUE	0.614413	0.0780971	0.557881	0.0723965	0.573304	0.0740635	0.588881	0.0757331	0.604611	0.0774053	0.620497	0.0790801	0.636541	0.0807574	0.652743	0.0824374	0.669106	0.08412	0.583877	0.0751236	0.588062	0.075435	0.668829	0.0840077	0.605868	0.0791756	0.615215	0.0789163	0.60807	0.0789407	0.608403	0.0792494	0.612005	0.0792798	0.609626	0.0790162	0.612552	0.0798505	0.615913	0.0799647	0.614298	0.0800313	0.617351	0.0802041	0.617554	0.079826	0.613815	0.079858
3D plot	FALSE	0.617471	0.0782169	0.557657	0.0723984	0.573073	0.0740655	0.588642	0.0757351	0.604365	0.0774073	0.620244	0.0790821	0.636279	0.0807595	0.652474	0.0824396	0.668829	0.0841222	0.588062	0.0755706	0.592259	0.0758813	IsoLine	IsoLine	0.600034	0.0788715	0.610288	0.0784946	0.603381	0.0786028	0.603742	0.078884	0.607417	0.078972	0.605207	0.0785329	0.60662	0.0793959	0.609254	0.0797089	0.608329	0.0796386	0.611202	0.079794	0.612868	0.0795149	0.609	0.0794432
Linear	FALSE	0.617646	0.0783104	0.557432	0.0723965	0.572842	0.0740635	0.588403	0.0757331	0.604119	0.0774053	0.61999	0.0790801	0.636018	0.0807574	0.652204	0.0824374	0.668551	0.08412	0.592259	0.0760177	0.596466	0.0763278			0.594428	0.0785089	0.605555	0.0780305	0.598876	0.0782193	0.599265	0.0784747	0.60301	0.0786189	0.600962	0.0780255	0.600922	0.0788852	0.602853	0.0793901	0.602593	0.0791868	0.605295	0.0793233	0.608366	0.0791575	0.604375	0.0789861
Data Range	AC15:AG31	0.613936	0.0783423	0.557217	0.072391	0.572619	0.0740578	0.588174	0.0757273	0.603882	0.0773993	0.619746	0.0790739	0.635766	0.0807512	0.651945	0.082431	0.668284	0.0841135	0.596466	0.0764651	0.600684	0.0767745			0.589265	0.0781016	0.601198	0.0775419	0.594728	0.0778051	0.595143	0.0780373	0.598951	0.078234	0.597055	0.0775136	0.595675	0.0783379	0.596956	0.0790206	0.597312	0.078693	0.599855	0.07881	0.60422	0.0787675	0.600117	0.0785043
Filled Symbols	TRUE	0.620353	0.0784793	0.557018	0.0723819	0.572414	0.0740485	0.587962	0.0757178	0.603664	0.0773896	0.619521	0.079064	0.635534	0.080741	0.651706	0.0824207	0.668038	0.0841029	0.600684	0.0769126	0.604914	0.0772214			0.584743	0.0776653	0.597384	0.0770476	0.591097	0.0773759	0.591534	0.0775885	0.595397	0.0778321	0.593635	0.0770167	0.591082	0.0777752	0.59179	0.0786146	0.592688	0.0781764	0.595092	0.078274	0.60059	0.0783599	0.59639	0.0780162
ConcAge	TRUE	0.627577	0.0785434	0.556844	0.0723697	0.572234	0.0740361	0.587776	0.075705	0.603472	0.0773765	0.619323	0.0790507	0.635331	0.0807274	0.651497	0.0824067	0.667823	0.0840887	0.604914	0.0773603	0.609155	0.0776685			0.581036	0.0772168	0.59426	0.0765665	0.588122	0.0769483	0.588579	0.0771457	0.592486	0.0774287	0.590834	0.0765539	0.58732	0.0772187	0.587554	0.0781877	0.588898	0.0776567	0.59119	0.0777358	0.597615	0.0779505	0.593338	0.0775407
ConcSwap	FALSE	0.616062	0.0786652	0.556701	0.0723549	0.572087	0.0740209	0.587624	0.0756894	0.603315	0.0773606	0.619161	0.0790344	0.635164	0.0807108	0.651325	0.0823897	0.667646	0.0840713	0.609155	0.0778082	0.613407	0.0781157			0.578286	0.0767733	0.591946	0.0761171	0.585917	0.0765388	0.586389	0.0767258	0.590327	0.0770392	0.58876	0.0761431	0.584532	0.0766897	0.58441	0.0777563	0.58609	0.077154	0.588297	0.077216	0.59541	0.0775549	0.591077	0.077096
1st Symbol-row	1	0.626026	0.0788663	0.556595	0.0723379	0.571977	0.0740035	0.587511	0.0756717	0.603199	0.0773425	0.619041	0.0790158	0.63504	0.0806918	0.651198	0.0823703	0.667514	0.0840515	0.613407	0.0782563	0.61767	0.0785632			0.5766	0.0763518	0.590531	0.0757167	0.584568	0.0761631	0.585049	0.076345	0.589006	0.0766787	0.587492	0.0758	0.582826	0.0762085	0.582479	0.0773371	0.584369	0.0766874	0.586525	0.0767348	0.59406	0.0771883	0.589695	0.0766991
		0.622418	0.0789869	0.55653	0.0723195	0.57191	0.0739847	0.587441	0.0756524	0.603127	0.0773227	0.618967	0.0789957	0.634964	0.0806712	0.651119	0.0823493	0.667434	0.08403	0.61767	0.0787046	0.621944	0.0790108			0.576042	0.0759687	0.590069	0.0753807	0.584126	0.0758355	0.584611	0.0760178	0.588571	0.0763609	0.587079	0.0755379	0.582268	0.0757938	0.581835	0.076946	0.583804	0.0762751	0.585943	0.0763104	0.593616	0.0768648	0.589244	0.0763655
		IsoLine	IsoLine	0.556508	0.0723004	0.571887	0.0739651	0.587418	0.0756324	0.603103	0.0773023	0.618942	0.0789747	0.634938	0.0806498	0.651092	0.0823274	0.667406	0.0840077	0.621944	0.079153	0.62623	0.0794586			0.576633	0.0756384	0.590578	0.075122	0.584607	0.0755688	0.585091	0.075757	0.589041	0.0760982	0.587537	0.0753667	0.582879	0.0754613	0.582503	0.0765981	0.584414	0.0759328	0.586572	0.0759594	0.594096	0.0765969	0.589742	0.0761077
				0.55653	0.0722813	0.57191	0.0739455	0.587441	0.0756123	0.603127	0.0772818	0.618967	0.0789538	0.634964	0.0806284	0.651119	0.0823056	0.667434	0.0839854	0.62623	0.0796017	0.630527	0.0799066			0.578351	0.0753739	0.592039	0.0749505	0.585994	0.0753731	0.586472	0.0755724	0.590397	0.0759005	0.588849	0.0752931	0.584635	0.075224	0.584458	0.0763068	0.586178	0.0756736	0.588389	0.0756951	0.59548	0.0763949	0.59117	0.0759359
				0.556595	0.0722629	0.571977	0.0739267	0.587511	0.0755931	0.603199	0.0772621	0.619041	0.0789336	0.63504	0.0806078	0.651198	0.0822845	0.667514	0.0839639	0.630527	0.0800505	0.634836	0.0803548			0.581129	0.0751852	0.594395	0.0748729	0.588233	0.0752559	0.588699	0.0754713	0.592586	0.0757756	0.590963	0.0753199	0.587469	0.0750908	0.587623	0.0760833	0.589026	0.0755076	0.591323	0.0755277	0.597716	0.0762665	0.593473	0.0758565
				0.556701	0.0722459	0.572087	0.0739093	0.587624	0.0755753	0.603315	0.0772439	0.619161	0.078915	0.635164	0.0805888	0.651325	0.0822651	0.667646	0.0839441	0.634836	0.0804995	0.639155	0.0808031			0.584862	0.0750795	0.597556	0.0748921	0.591239	0.0752219	0.591688	0.0754574	0.595525	0.0757281	0.593799	0.075446	0.591273	0.0750669	0.591879	0.0759362	0.59285	0.0754411	0.595262	0.0754637	0.600719	0.0762166	0.596562	0.0758727
				0.556844	0.0722311	0.572234	0.0738941	0.587776	0.0755598	0.603472	0.077228	0.619323	0.0788988	0.635331	0.0805722	0.651497	0.0822481	0.667823	0.0839267	0.639155	0.0809487	0.643487	0.0812517			0.589405	0.075061	0.6014	0.0750074	0.594895	0.0752722	0.595323	0.0755314	0.599101	0.0757599	0.597248	0.0756667	0.595899	0.0751533	0.59706	0.0758711	0.597503	0.0754767	0.600055	0.0755054	0.604371	0.0762471	0.600319	0.0759838
				0.557018	0.0722189	0.572414	0.0738817	0.587962	0.075547	0.603664	0.0772149	0.619521	0.0788854	0.635534	0.0805585	0.651706	0.0822342	0.668038	0.0839125	0.643487	0.0813981	0.647829	0.0817004			0.594584	0.0751304	0.605779	0.0752143	0.599061	0.0754049	0.599466	0.0756903	0.603177	0.0758698	0.601177	0.0759734	0.601171	0.0753466	0.602968	0.0758905	0.602806	0.0756129	0.605517	0.0756514	0.608534	0.076357	0.604599	0.0761855
				0.557217	0.0722098	0.572619	0.0738724	0.588174	0.0755375	0.603882	0.0772052	0.619746	0.0788755	0.635766	0.0805484	0.651945	0.0822238	0.668284	0.0839019	0.647829	0.0818477	0.652184	0.0821494			0.600199	0.0752849	0.610526	0.0755049	0.603577	0.0756151	0.603955	0.075928	0.607595	0.0760536	0.605435	0.0763543	0.606885	0.0756394	0.609376	0.0759938	0.608555	0.0758447	0.611438	0.0758959	0.613047	0.076542	0.609238	0.0764701
				0.557432	0.0722043	0.572842	0.0738667	0.588403	0.0755317	0.604119	0.0771992	0.61999	0.0788694	0.636018	0.0805421	0.652204	0.0822175	0.668551	0.0838954	0.652184	0.0822975	0.656549	0.0825985			0.606036	0.0755187	0.615458	0.075868	0.60827	0.0758944	0.60862	0.0762356	0.612186	0.0763042	0.609858	0.0767949	0.612822	0.0760205	0.616038	0.0761768	0.614528	0.0761629	0.617591	0.0762297	0.617737	0.0767949	0.614057	0.0768266
				0.557657	0.0722024	0.573073	0.0738647	0.588642	0.0755297	0.604365	0.0771972	0.620244	0.0788673	0.636279	0.08054	0.652474	0.0822153	0.668829	0.0838932	0.656549	0.0827474	0.660926	0.0830478			0.61187	0.0758228	0.620385	0.0762897	0.612959	0.0762323	0.613281	0.076601	0.616774	0.076612	0.614277	0.0772781	0.618754	0.0764751	0.622697	0.0764326	0.620498	0.0765556	0.623739	0.0766398	0.622423	0.077106	0.618872	0.0772414
				0.557881	0.0722043	0.573304	0.0738667	0.588881	0.0755317	0.604611	0.0771992	0.620497	0.0788694	0.636541	0.0805421	0.652743	0.0822175	0.669106	0.0838954	0.660926	0.0831976	0.665315	0.0834973			0.617476	0.0761855	0.625118	0.0767538	0.617464	0.0766158	0.617758	0.0770103	0.621182	0.0769651	0.618522	0.0777855	0.624453	0.0769859	0.629098	0.0767514	0.626234	0.0770074	0.629647	0.0771105	0.626926	0.0774634	0.623497	0.0776985
				0.558096	0.0722098	0.573527	0.0738724	0.58911	0.0755375	0.604848	0.0772052	0.620742	0.0788755	0.636793	0.0805484	0.653003	0.0822238	0.669373	0.0839019	0.665315	0.0836479	0.669716	0.0839469			0.622639	0.0765927	0.629475	0.0772424	0.621611	0.0770301	0.62188	0.0774477	0.62524	0.07735	0.622429	0.0782975	0.629699	0.0775331	0.634995	0.0771209	0.631515	0.0775012	0.635087	0.0776237	0.631072	0.0778534	0.627755	0.0781804
				0.558295	0.0722189	0.573732	0.0738817	0.589322	0.075547	0.605066	0.0772149	0.620967	0.0788854	0.637024	0.0805585	0.653241	0.0822342	0.669619	0.0839125	0.669716	0.0840984	0.674128	0.0843968			0.627161	0.077029	0.633289	0.0777368	0.625243	0.0774592	0.625488	0.0778964	0.628794	0.0777519	0.625849	0.0787944	0.634292	0.0780958	0.640161	0.0775269	0.636139	0.0780178	0.639849	0.0781598	0.634702	0.078261	0.631482	0.0786684
				0.558469	0.0722311	0.573912	0.0738941	0.589507	0.0755598	0.605258	0.077228	0.621164	0.0788988	0.637228	0.0805722	0.653451	0.0822481	0.669835	0.0839267	0.674128	0.0845491	0.678551	0.0848468			0.630868	0.0774775	0.636413	0.0782179	0.628218	0.0778868	0.628444	0.0783393	0.631706	0.0781554	0.62865	0.0792571	0.638055	0.0786524	0.644397	0.0779538	0.639928	0.0785375	0.643752	0.078698	0.637676	0.0786704	0.634534	0.079144
				0.558612	0.0722459	0.574059	0.0739093	0.58966	0.0755753	0.605415	0.0772439	0.621326	0.078915	0.637395	0.0805888	0.653623	0.0822651	0.670011	0.0839441	0.678551	0.085	0.68006	0.085			0.633618	0.077921	0.638727	0.0786673	0.630422	0.0782963	0.630634	0.0787592	0.633864	0.0785448	0.630724	0.0796679	0.640842	0.0791814	0.647542	0.0783852	0.642737	0.0790403	0.646645	0.0792177	0.639881	0.079066	0.636795	0.0795887
				0.558718	0.0722629	0.574169	0.0739267	0.589773	0.0755931	0.605531	0.0772621	0.621446	0.0789336	0.637518	0.0806078	0.65375	0.0822845	0.670143	0.0839639	0.678551	0.085	0.677051	0.085			0.635304	0.0783425	0.640142	0.0790677	0.631772	0.0786721	0.631974	0.07914	0.635186	0.0789054	0.631992	0.080011	0.642548	0.0796625	0.649473	0.0788044	0.644457	0.0795068	0.648416	0.079699	0.641231	0.0794326	0.638177	0.0799855
				0.558784	0.0722813	0.574236	0.0739455	0.589842	0.0756123	0.605603	0.0772818	0.62152	0.0789538	0.637595	0.0806284	0.653829	0.0823056	0.670224	0.0839854	IsoLine	IsoLine	0.674128	0.0847014			0.635862	0.0787257	0.640604	0.0794037	0.632214	0.0789996	0.632412	0.0794671	0.63562	0.0792231	0.632405	0.0802732	0.643106	0.0800772	0.650117	0.0791955	0.645023	0.0799191	0.648998	0.0801233	0.641675	0.079756	0.638628	0.0803192
				0.558806	0.0723004	0.574259	0.0739651	0.589866	0.0756324	0.605627	0.0773023	0.621545	0.0789747	0.637621	0.0806498	0.653855	0.0823274	0.670251	0.0840077			0.669716	0.0842499			ErrEll	ErrEll	ErrEll	ErrEll	ErrEll	ErrEll	ErrEll	ErrEll	ErrEll	ErrEll	ErrEll	ErrEll	ErrEll	ErrEll	ErrEll	ErrEll	ErrEll	ErrEll	ErrEll	ErrEll	ErrEll	ErrEll	ErrEll	ErrEll
				ConcTikEll	ConcTikEll	ConcTikEll	ConcTikEll	ConcTikEll	ConcTikEll	ConcTikEll	ConcTikEll	ConcTikEll	ConcTikEll	ConcTikEll	ConcTikEll	ConcTikEll	ConcTikEll	ConcTikEll	ConcTikEll			0.665315	0.0837985
																						0.660926	0.0833474
																						0.656549	0.0828964
																						0.652184	0.0824456
																						0.647829	0.081995
																						0.643487	0.0815446
																						0.639155	0.0810943
																						0.634836	0.0806443
																						0.630527	0.0801944
																						0.62623	0.0797448
																						0.621944	0.0792953
																						0.61767	0.078846
																						0.613407	0.0783969
																						0.609155	0.077948
																						0.604914	0.0774992
																						0.600684	0.0770507
																						0.596466	0.0766023
																						0.592259	0.0761541
																						0.588062	0.0757062
																						0.583877	0.0752584
																						0.579703	0.0748107
																						0.57554	0.0743633
																						0.571388	0.0739161
																						0.567247	0.073469
																						0.563116	0.0730222
																						0.558997	0.0725755
																						0.554888	0.072129
																						0.553704	0.072
																						0.556079	0.072
																						ConcBand	ConcBand
[truncated: 12 more columns]

## Sheet: PlotDat6
Source sheet	all data	0.606449	0.0762828	460		470		480		490		500		510		520		0.57	0.0736344	0.57	0.0735024	0.557657	0.0723004	0.627983	0.0773869	0.628889	0.0778906	0.628279	0.0785631	0.63268	0.0790882	0.634206	0.0786814	0.630115	0.0784608	0.635749	0.0790171	0.627594	0.0786956	0.627819	0.0791357	0.6311	0.0789481	0.62805	0.0798182	0.637261	0.0796657	0.643556	0.0789794
Plot name	Concordia5	0.607504	0.0766413	0.574259	0.0739651	0.589866	0.0756324	0.605627	0.0773023	0.621545	0.0789747	0.637621	0.0806498	0.653855	0.0823274	0.670251	0.0840077	0.57	0.0736344	0.57	0.0735024	0.573073	0.0739651	0.627556	0.0776245	0.628463	0.078128	0.627869	0.0787739	0.632282	0.0792448	0.633858	0.0788531	0.629637	0.0787275	0.635337	0.0792261	0.627205	0.0789111	0.627431	0.0793464	0.63072	0.0791604	0.62768	0.0799565	0.636768	0.0799343	0.643016	0.0792604
Plot Type	1	0.607924	0.0769479	0.574236	0.0739847	0.589842	0.0756524	0.605603	0.0773227	0.62152	0.0789957	0.637595	0.0806712	0.653829	0.0823493	0.670224	0.08403	0.573624	0.0740243	0.573624	0.0738916	0.588642	0.0756324	0.626318	0.0778105	0.627231	0.0783084	0.626692	0.0789146	0.631144	0.0793199	0.632858	0.0789635	0.62825	0.0789413	0.634157	0.0793646	0.626084	0.0790692	0.626316	0.0794955	0.629625	0.07932	0.626621	0.080016	0.635349	0.080126	0.641437	0.0794958
1st free col	83	0.613	0.0771238	0.574169	0.0740035	0.589773	0.0756717	0.605531	0.0773425	0.621446	0.0790158	0.637518	0.0806918	0.65375	0.0823703	0.670143	0.0840515	0.577256	0.0744144	0.577256	0.0742809	0.604365	0.0773023	0.624316	0.0779379	0.625241	0.0784246	0.624794	0.0789797	0.629308	0.0793106	0.631246	0.0790082	0.626005	0.0790937	0.632254	0.0794273	0.624275	0.0791638	0.624516	0.0795773	0.627856	0.079421	0.624913	0.0799943	0.633059	0.0802336	0.63888	0.0796763
Sigma Level	2	0.616922	0.0772553	0.574059	0.0740209	0.58966	0.0756894	0.605415	0.0773606	0.621326	0.0790344	0.637395	0.0807108	0.653623	0.0823897	0.670011	0.0840713	0.580896	0.0748046	0.580896	0.0746704	0.620244	0.0789747	0.621628	0.0780016	0.62257	0.0784724	0.622248	0.0789667	0.626845	0.0792173	0.629084	0.0789856	0.62299	0.0791791	0.629701	0.0794118	0.621847	0.0791914	0.622102	0.0795885	0.625482	0.0794594	0.622622	0.0798924	0.629986	0.0802529	0.635442	0.0797951
Absolute Errs	FALSE	0.605952	0.0773472	0.573912	0.0740361	0.589507	0.075705	0.605258	0.0773765	0.621164	0.0790507	0.637228	0.0807274	0.653451	0.0824067	0.669835	0.0840887	0.584545	0.0751949	0.584545	0.07506	0.636279	0.0806498	0.618356	0.0779993	0.61932	0.0784498	0.619151	0.0788761	0.623851	0.0790435	0.626454	0.0788964	0.61932	0.079194	0.626595	0.0793187	0.618894	0.0791507	0.619165	0.0795287	0.622593	0.0794336	0.619836	0.0797142	0.626249	0.0801831	0.631257	0.0798477
Symbol Type	1	0.615337	0.0773922	0.573732	0.0740485	0.589322	0.0757178	0.605066	0.0773896	0.620967	0.079064	0.637024	0.080741	0.653241	0.0824207	0.669619	0.0841029	0.588202	0.0755854	0.588202	0.0754498	0.652474	0.0823274	0.614627	0.077931	0.615615	0.0783576	0.615623	0.0787114	0.620439	0.078796	0.623458	0.0787442	0.615136	0.079138	0.623057	0.0791516	0.615528	0.0790434	0.615819	0.0794004	0.619301	0.0793448	0.616662	0.0794664	0.62199	0.0800269	0.626484	0.079832
Inverse Plot	FALSE	0.60817	0.0774176	0.573527	0.0740578	0.58911	0.0757273	0.604848	0.0773993	0.620742	0.0790739	0.636793	0.0807512	0.653003	0.082431	0.669373	0.0841135	0.591867	0.0759761	0.591867	0.0758397	0.668829	0.0840077	0.610583	0.0777994	0.611599	0.0781996	0.611799	0.078479	0.616742	0.0784842	0.620211	0.0785348	0.610599	0.0790131	0.619223	0.0789168	0.61188	0.0788737	0.612192	0.0792083	0.615731	0.0791964	0.613222	0.0791586	0.617374	0.0797904	0.621307	0.0797486
Color Plot	TRUE	0.608511	0.0777425	0.573304	0.0740635	0.588881	0.0757331	0.604611	0.0774053	0.620497	0.0790801	0.636541	0.0807574	0.652743	0.0824374	0.669106	0.08412	0.595541	0.0763669	0.595541	0.0762298	IsoLine	IsoLine	0.606381	0.0776095	0.607426	0.0779816	0.607826	0.0781877	0.612901	0.0781201	0.616837	0.0782762	0.605884	0.0788242	0.615239	0.0786235	0.608089	0.078648	0.608424	0.0789598	0.612023	0.0789939	0.609648	0.0788027	0.612578	0.0794826	0.615925	0.0796008
3D plot	FALSE	0.612096	0.077792	0.573073	0.0740655	0.588642	0.0757351	0.604365	0.0774073	0.620244	0.0790821	0.636279	0.0807595	0.652474	0.0824396	0.668829	0.0841222	0.599224	0.0767578	0.599224	0.07662			0.602181	0.0773687	0.603256	0.0777121	0.603857	0.0778488	0.609063	0.0777177	0.613467	0.0779783	0.601171	0.0785786	0.611258	0.0782828	0.604301	0.078375	0.604659	0.0786646	0.608316	0.0787453	0.606078	0.0784124	0.607786	0.0791153	0.610546	0.0793941
Linear	FALSE	0.609742	0.0779055	0.572842	0.0740635	0.588403	0.0757331	0.604119	0.0774053	0.61999	0.0790801	0.636018	0.0807574	0.652204	0.0824374	0.668551	0.08412	0.602915	0.0771488	0.602915	0.0770103			0.598145	0.077086	0.599248	0.0774015	0.600044	0.0774752	0.605377	0.0772925	0.610229	0.0776527	0.596642	0.0782856	0.607435	0.0779079	0.600662	0.0780653	0.601042	0.078334	0.604756	0.07846	0.602649	0.0780025	0.603182	0.0787027	0.605375	0.0791366
Data Range	AC10:AG37	0.612687	0.0779355	0.572619	0.0740578	0.588174	0.0757273	0.603882	0.0773993	0.619746	0.0790739	0.635766	0.0807512	0.651945	0.082431	0.668284	0.0841135	0.606615	0.07754	0.606615	0.0774008			0.594429	0.0767726	0.595559	0.0770617	0.596534	0.0770814	0.601984	0.0768609	0.607249	0.0773118	0.592471	0.0779566	0.603915	0.0775132	0.597311	0.0777306	0.597712	0.0779806	0.601477	0.0781491	0.599493	0.0775889	0.598944	0.0782606	0.600611	0.0788381
Filled Symbols	TRUE	0.615976	0.0780708	0.572414	0.0740485	0.587962	0.0757178	0.603664	0.0773896	0.619521	0.079064	0.635534	0.080741	0.651706	0.0824207	0.668038	0.0841029	0.610323	0.0779314	0.610323	0.0777914			0.591174	0.0764403	0.592328	0.0767057	0.593461	0.0766824	0.599014	0.0764393	0.60464	0.0769687	0.588818	0.0776042	0.600834	0.0771138	0.594378	0.0773839	0.594797	0.0776181	0.598606	0.0778244	0.59673	0.0771875	0.595234	0.077806	0.596438	0.0785101
ConcAge	TRUE	0.614413	0.0780971	0.572234	0.0740361	0.587776	0.075705	0.603472	0.0773765	0.619323	0.0790507	0.635331	0.0807274	0.651497	0.0824067	0.667823	0.0840887	0.614039	0.0783229	0.614039	0.0781822			0.588506	0.0761019	0.58968	0.0763472	0.590945	0.0762937	0.596582	0.076044	0.602503	0.0766367	0.585823	0.0772418	0.59831	0.0767251	0.591974	0.0770385	0.592409	0.0772604	0.596254	0.0774985	0.594467	0.0768136	0.592194	0.0773564	0.593015	0.0781652
ConcSwap	FALSE	0.617471	0.0782169	0.572087	0.0740209	0.587624	0.0756894	0.603315	0.0773606	0.619161	0.0790344	0.635164	0.0807108	0.651325	0.0823897	0.667646	0.0840713	0.617765	0.0787145	0.617765	0.0785731			0.586528	0.0757705	0.587718	0.0760001	0.589081	0.0759301	0.59478	0.0756903	0.60092	0.0763284	0.583602	0.0768836	0.596441	0.0763621	0.590193	0.0767077	0.59064	0.0769212	0.59451	0.0771839	0.592792	0.0764818	0.589942	0.0769291	0.590475	0.0778168
1st Symbol-row	1	0.617646	0.0783104	0.571977	0.0740035	0.587511	0.0756717	0.603199	0.0773425	0.619041	0.0790158	0.63504	0.0806918	0.651198	0.0823703	0.667514	0.0840515	0.621498	0.0791063	0.621498	0.0789641			0.585316	0.0754588	0.586515	0.0756776	0.587941	0.0756056	0.593679	0.0753916	0.599953	0.0760557	0.58224	0.0765431	0.595297	0.0760386	0.589103	0.0764041	0.589557	0.0766135	0.593442	0.0768926	0.591767	0.0762046	0.588564	0.0765404	0.588915	0.077478
		0.613936	0.0783423	0.57191	0.0739847	0.587441	0.0756524	0.603127	0.0773227	0.618967	0.0789957	0.634964	0.0806712	0.651119	0.0823493	0.667434	0.08403	0.625241	0.0794982	0.625241	0.0793553			0.584915	0.0751787	0.58612	0.0753921	0.587569	0.0753327	0.59332	0.0751595	0.599637	0.0758292	0.581789	0.0762335	0.594924	0.0757672	0.588746	0.0761395	0.589204	0.0763492	0.593092	0.0766359	0.591434	0.0759928	0.588113	0.0762053	0.588395	0.0771621
		0.620353	0.0784793	0.571887	0.0739651	0.587418	0.0756324	0.603103	0.0773023	0.618942	0.0789747	0.634938	0.0806498	0.651092	0.0823274	0.667406	0.0840077	0.628992	0.0798903	0.628992	0.0797466			0.585342	0.0749411	0.586546	0.0751546	0.587979	0.0751218	0.593718	0.0750029	0.599986	0.0756574	0.582267	0.0759668	0.595336	0.0755582	0.589135	0.075924	0.589592	0.0761385	0.593471	0.0764237	0.591804	0.0758545	0.588607	0.0759368	0.588935	0.0768811
		0.627577	0.0785434	0.57191	0.0739455	0.587441	0.0756123	0.603127	0.0772818	0.618967	0.0789538	0.634964	0.0806284	0.651119	0.0823056	0.667434	0.0839854	0.632752	0.0802825	0.632752	0.0801381			0.58658	0.0747551	0.587778	0.0749743	0.589156	0.0749812	0.594856	0.0749278	0.600985	0.075547	0.583654	0.0757531	0.596516	0.0754197	0.590255	0.0757659	0.590707	0.0759894	0.594566	0.076264	0.592863	0.0757951	0.590025	0.075745	0.590514	0.0766457
		0.616062	0.0786652	0.571977	0.0739267	0.587511	0.0755931	0.603199	0.0772621	0.619041	0.0789336	0.63504	0.0806078	0.651198	0.0822845	0.667514	0.0839639	0.63652	0.0806748	0.63652	0.0805297			0.588582	0.0746277	0.589767	0.074858	0.591054	0.0749161	0.596692	0.074937	0.602597	0.0755023	0.585899	0.0756006	0.598419	0.075357	0.592064	0.0756713	0.592506	0.0759077	0.596335	0.076163	0.594572	0.0758167	0.592315	0.0756374	0.593071	0.0764652
		0.626026	0.0788663	0.572087	0.0739093	0.587624	0.0755753	0.603315	0.0772439	0.619161	0.078915	0.635164	0.0805888	0.651325	0.0822651	0.667646	0.0839441	0.640297	0.0810673	0.640297	0.0809215			0.59127	0.074564	0.592439	0.0748102	0.5936	0.0749291	0.599155	0.0750304	0.604759	0.075525	0.588914	0.0755153	0.600972	0.0753725	0.594492	0.0756438	0.594921	0.0758965	0.598709	0.0761247	0.596863	0.0759186	0.595388	0.0756182	0.596509	0.0763464
		0.622418	0.0789869	0.572234	0.0738941	0.587776	0.0755598	0.603472	0.077228	0.619323	0.0788988	0.635331	0.0805722	0.651497	0.0822481	0.667823	0.0839267	0.644083	0.0814599	0.644083	0.0813134			0.594542	0.0745663	0.595689	0.0748329	0.596697	0.0750196	0.602149	0.0752041	0.607389	0.0756141	0.592584	0.0755003	0.604078	0.0754656	0.597446	0.0756844	0.597858	0.0759562	0.601598	0.0761504	0.599649	0.0760969	0.599125	0.0756879	0.600695	0.0762938
		0.630702	0.0791442	0.572414	0.0738817	0.587962	0.075547	0.603664	0.0772149	0.619521	0.0788854	0.635534	0.0805585	0.651706	0.0822342	0.668038	0.0839125	0.647878	0.0818527	0.647878	0.0817054			0.598271	0.0746346	0.599393	0.074925	0.600225	0.0751843	0.605561	0.0754517	0.610385	0.0757663	0.596768	0.0755564	0.607616	0.0756328	0.600811	0.0757917	0.601204	0.0760846	0.604891	0.0762392	0.602822	0.0763446	0.603384	0.0758441	0.605468	0.0763095
		0.627837	0.0794074	0.572619	0.0738724	0.588174	0.0755375	0.603882	0.0772052	0.619746	0.0788755	0.635766	0.0805484	0.651945	0.0822238	0.668284	0.0839019	0.651681	0.0822456	0.651681	0.0820976			0.602315	0.0747662	0.603409	0.0750831	0.604049	0.0754168	0.609258	0.0757635	0.613632	0.0759757	0.601305	0.0756812	0.61145	0.0758675	0.60446	0.0759614	0.604831	0.0762767	0.60846	0.0763877	0.606262	0.0766524	0.608	0.0760806	0.610644	0.0763929
		0.627445	0.0794482	0.572842	0.0738667	0.588403	0.0755317	0.604119	0.0771992	0.61999	0.0788694	0.636018	0.0805421	0.652204	0.0822175	0.668551	0.0838954	0.655493	0.0826387	0.655493	0.0824899			0.606517	0.0749561	0.607583	0.075301	0.608022	0.0757081	0.613099	0.0761275	0.617006	0.0762343	0.60602	0.0758701	0.615435	0.0761609	0.608251	0.0761871	0.608599	0.0765251	0.612169	0.0765901	0.609836	0.0770083	0.612796	0.0763885	0.616026	0.0765407
		0.628419	0.0796324	0.573073	0.0738647	0.588642	0.0755297	0.604365	0.0771972	0.620244	0.0788673	0.636279	0.08054	0.652474	0.0822153	0.668829	0.0838932	0.659314	0.0830319	0.659314	0.0828824			0.610717	0.075197	0.611753	0.0755705	0.611992	0.076047	0.616937	0.0765299	0.620376	0.0765322	0.610733	0.0761157	0.619415	0.0765016	0.612039	0.0764601	0.612364	0.0768203	0.615875	0.0768388	0.613406	0.0773987	0.617588	0.0767557	0.621406	0.0767474
		0.634064	0.0799752	0.573304	0.0738667	0.588881	0.0755317	0.604611	0.0771992	0.620497	0.0788694	0.636541	0.0805421	0.652743	0.0822175	0.669106	0.0838954	0.663144	0.0834252	0.663144	0.083275			0.614752	0.0754796	0.61576	0.0758811	0.615805	0.0764205	0.620623	0.0769551	0.623614	0.0768578	0.615262	0.0764087	0.623238	0.0768765	0.615678	0.0767699	0.615981	0.077151	0.619436	0.077124	0.616835	0.0778086	0.622192	0.0771683	0.626577	0.0770049
		0.63402	0.0804063	0.573527	0.0738724	0.58911	0.0755375	0.604848	0.0772052	0.620742	0.0788755	0.636793	0.0805484	0.653003	0.0822238	0.669373	0.0839019	0.666982	0.0838187	0.666982	0.0836677			0.618469	0.075793	0.61945	0.0762209	0.619315	0.0768144	0.624016	0.0773868	0.626594	0.0771987	0.619433	0.0767377	0.626758	0.0772712	0.619029	0.0771045	0.619311	0.0775043	0.622715	0.077435	0.619991	0.0782221	0.62643	0.0776104	0.631341	0.0773034
		IsoLine	IsoLine	0.573732	0.0738817	0.589322	0.075547	0.605066	0.0772149	0.620967	0.0788854	0.637024	0.0805585	0.653241	0.0822342	0.669619	0.0839125	0.67083	0.0842123	0.67083	0.0840606			0.621724	0.0761253	0.622681	0.0765769	0.622387	0.0772133	0.626986	0.0778083	0.629203	0.0775418	0.623086	0.0770902	0.629839	0.0776706	0.621962	0.0774512	0.622226	0.0778668	0.625585	0.0777596	0.622754	0.0786236	0.63014	0.078065	0.635514	0.0776314
				0.573912	0.0738941	0.589507	0.0755598	0.605258	0.077228	0.621164	0.0788988	0.637228	0.0805722	0.653451	0.0822481	0.669835	0.0839267	0.674686	0.0846061	0.674686	0.0844537			0.624391	0.0764637	0.625328	0.0769354	0.624903	0.0776021	0.629418	0.0782036	0.63134	0.0778738	0.62608	0.0774525	0.632363	0.0780592	0.624365	0.0777966	0.624614	0.0782246	0.627938	0.0780855	0.625017	0.0789974	0.63318	0.0785146	0.638936	0.0779763
				0.574059	0.0739093	0.58966	0.0755753	0.605415	0.0772439	0.621326	0.078915	0.637395	0.0805888	0.653623	0.0822651	0.670011	0.0839441	0.678551	0.085	0.678551	0.0848468			0.62637	0.0767951	0.627291	0.0772826	0.626767	0.0779657	0.63122	0.0785574	0.632923	0.0781821	0.628302	0.0778108	0.634232	0.0784223	0.626146	0.0781275	0.626383	0.0785638	0.629681	0.0784002	0.626692	0.0793293	0.635432	0.078942	0.641476	0.0783247
				0.574169	0.0739267	0.589773	0.0755931	0.605531	0.0772621	0.621446	0.0789336	0.637518	0.0806078	0.65375	0.0822845	0.670143	0.0839639	0.678551	0.085	0.68	0.0849939			0.627582	0.0771068	0.628493	0.0776051	0.627907	0.0782902	0.632321	0.078856	0.633891	0.0784548	0.629664	0.0781512	0.635376	0.0787457	0.627236	0.078431	0.627465	0.0788715	0.630749	0.0786914	0.627717	0.0796064	0.63681	0.0793306	0.643036	0.0786635
				0.574236	0.0739455	0.589842	0.0756123	0.605603	0.0772818	0.62152	0.0789538	0.637595	0.0806284	0.653829	0.0823056	0.670224	0.0839854	IsoLine	IsoLine	0.68	0.085			0.627983	0.0773869	0.628889	0.0778906	0.628279	0.0785631	0.63268	0.0790882	0.634206	0.0786814	0.630115	0.0784608	0.635749	0.0790171	0.627594	0.0786956	0.627819	0.0791357	0.6311	0.0789481	0.62805	0.0798182	0.637261	0.0796657	0.643556	0.0789794
				0.574259	0.0739651	0.589866	0.0756324	0.605627	0.0773023	0.621545	0.0789747	0.637621	0.0806498	0.653855	0.0823274	0.670251	0.0840077			0.677051	0.085			ErrEll	ErrEll	ErrEll	ErrEll	ErrEll	ErrEll	ErrEll	ErrEll	ErrEll	ErrEll	ErrEll	ErrEll	ErrEll	ErrEll	ErrEll	ErrEll	ErrEll	ErrEll	ErrEll	ErrEll	ErrEll	ErrEll	ErrEll	ErrEll	ErrEll	ErrEll
				ConcTikEll	ConcTikEll	ConcTikEll	ConcTikEll	ConcTikEll	ConcTikEll	ConcTikEll	ConcTikEll	ConcTikEll	ConcTikEll	ConcTikEll	ConcTikEll	ConcTikEll	ConcTikEll			0.674686	0.0847585
																				0.67083	0.084364
																				0.666982	0.0839696
																				0.663144	0.0835754
																				0.659314	0.0831814
																				0.655493	0.0827874
																				0.651681	0.0823936
																				0.647878	0.082
																				0.644083	0.0816065
																				0.640297	0.0812131
																				0.63652	0.0808199
																				0.632752	0.0804268
																				0.628992	0.0800339
																				0.625241	0.0796411
																				0.621498	0.0792485
																				0.617765	0.078856
																				0.614039	0.0784636
																				0.610323	0.0780714
																				0.606615	0.0776793
																				0.602915	0.0772874
																				0.599224	0.0768956
																				0.595541	0.0765039
																				0.591867	0.0761124
																				0.588202	0.0757211
																				0.584545	0.0753298
																				0.580896	0.0749388
																				0.577256	0.0745478
																				0.573624	0.074157
																				0.57	0.0737664
																				0.57	0.0737664
																				0.57	0.0735024
																				ConcBand	ConcBand
[truncated: 32 more columns]

## Sheet: PlotDat8
Source sheet	all data	0.645584	0.0806174	480		490		500		510		520		530		540		0.601509	0.077	0.602818	0.077	0.588642	0.0756324	0.673747	0.0824507	0.675322	0.0828224	0.680081	0.0828096	0.672192	0.0831903	0.686751	0.0838746	0.674803	0.0833012	0.692585	0.0829969	0.674286	0.0832998	0.679559	0.0835425	0.69605	0.0837375	0.68256	0.0846714	0.690812	0.0845637	0.685685	0.0842881
Plot name	Concordia6	0.647543	0.0817098	0.605627	0.0773023	0.621545	0.0789747	0.637621	0.0806498	0.653855	0.0823274	0.670251	0.0840077	0.68681	0.0856906	0.703532	0.087376	0.601509	0.077	0.605076	0.0772385	0.604365	0.0773023	0.673183	0.0827568	0.674776	0.0831186	0.679424	0.0831492	0.671684	0.0834745	0.686246	0.0841276	0.674372	0.0835374	0.691877	0.0833408	0.67383	0.0835536	0.679027	0.0838336	0.695514	0.084023	0.682106	0.0849161	0.690362	0.0848072	0.685245	0.0845327
Plot Type	1	0.64649	0.0817263	0.605603	0.0773227	0.62152	0.0789957	0.637595	0.0806712	0.653829	0.0823493	0.670224	0.08403	0.686781	0.0857134	0.703503	0.0873993	0.605076	0.0773775	0.608651	0.0776154	0.620244	0.0789747	0.671559	0.0829807	0.673183	0.0833606	0.677501	0.0834341	0.670215	0.0836941	0.684796	0.0842953	0.673129	0.0837115	0.689799	0.0836342	0.672504	0.0837548	0.677478	0.0840698	0.693951	0.0842559	0.680797	0.0850902	0.689066	0.0849855	0.683966	0.0847238
1st free col	63	0.646658	0.0817919	0.605531	0.0773425	0.621446	0.0790158	0.637518	0.0806918	0.65375	0.0823703	0.670143	0.0840515	0.686698	0.0857353	0.703417	0.0874217	0.608651	0.077755	0.612233	0.0779924	0.636279	0.0806498	0.668937	0.0831138	0.670604	0.0835391	0.674387	0.0836533	0.66784	0.0838406	0.682457	0.0843714	0.671121	0.0838169	0.68643	0.0838659	0.670361	0.0838958	0.67497	0.0842418	0.69142	0.0844273	0.678686	0.0851871	0.686973	0.0850917	0.6819	0.0848541
Sigma Level	2	0.661657	0.0819092	0.605415	0.0773606	0.621326	0.0790344	0.637395	0.0807108	0.653623	0.0823897	0.670011	0.0840713	0.686563	0.0857555	0.703278	0.0874423	0.612233	0.0781328	0.615824	0.0783695	0.652474	0.0823274	0.665417	0.0831509	0.66714	0.0836474	0.6702	0.0837986	0.664651	0.0839084	0.679319	0.0843528	0.668426	0.0838494	0.681902	0.084027	0.667482	0.083971	0.671601	0.0843431	0.688019	0.0845306	0.675852	0.0852031	0.684163	0.0851217	0.679124	0.0849187
Absolute Errs	FALSE	0.653236	0.0819218	0.605258	0.0773765	0.621164	0.0790507	0.637228	0.0807274	0.653451	0.0824067	0.669835	0.0840887	0.686381	0.0857732	0.703091	0.0874604	0.615824	0.0785106	0.619423	0.0787468	0.668829	0.0840077	0.661136	0.0830907	0.662922	0.0836812	0.665102	0.0838641	0.660771	0.0838948	0.675502	0.0842403	0.665147	0.0838079	0.676386	0.0841113	0.663978	0.0839777	0.6675	0.0843699	0.683878	0.0845617	0.672406	0.0851375	0.680744	0.0850744	0.675747	0.0849149
Symbol Type	1	0.656229	0.0820284	0.605066	0.0773896	0.620967	0.079064	0.637024	0.080741	0.653241	0.0824207	0.669619	0.0841029	0.686159	0.0857878	0.702863	0.0874752	0.619423	0.0788886	0.623029	0.0791242	0.685345	0.0856906	0.656256	0.0829355	0.658114	0.0836392	0.659289	0.0838476	0.656348	0.0838004	0.671152	0.0840382	0.66141	0.0836938	0.670096	0.0841155	0.659983	0.0839155	0.662825	0.084321	0.679157	0.0845196	0.668479	0.0849928	0.676849	0.0849517	0.671897	0.084843
Inverse Plot	FALSE	0.651219	0.0821861	0.604848	0.0773993	0.620742	0.0790739	0.636793	0.0807512	0.653003	0.082431	0.669373	0.0841135	0.685906	0.0857986	0.702602	0.0874863	0.623029	0.0792667	0.626644	0.0795018	0.702025	0.087376	0.650967	0.0826911	0.652899	0.0835231	0.652984	0.0837495	0.651554	0.0836288	0.666438	0.0837543	0.657359	0.0835117	0.663273	0.0840396	0.655652	0.0837869	0.657755	0.0841983	0.674038	0.0844057	0.664222	0.0847747	0.672626	0.0847581	0.667723	0.0847058
Color Plot	TRUE	0.652552	0.0824019	0.604611	0.0774053	0.620497	0.0790801	0.636541	0.0807574	0.652743	0.0824374	0.669106	0.08412	0.685631	0.0858052	0.702319	0.087493	0.626644	0.0796449	0.630267	0.0798795	IsoLine	IsoLine	0.64547	0.0823671	0.647478	0.0833373	0.64643	0.0835736	0.64657	0.0833867	0.661541	0.0833996	0.65315	0.0832684	0.65618	0.0838863	0.65115	0.0835967	0.652485	0.0840066	0.668716	0.0842246	0.659798	0.0844915	0.668238	0.0845013	0.663385	0.0845085
3D plot	FALSE	0.668779	0.0826545	0.604365	0.0774073	0.620244	0.0790821	0.636279	0.0807595	0.652474	0.0824396	0.668829	0.0841222	0.685345	0.0858075	0.702025	0.0874953	0.630267	0.0800233	0.633897	0.0802573			0.639978	0.0819758	0.64206	0.0830889	0.639878	0.0833268	0.641591	0.0830832	0.656647	0.0829875	0.648944	0.0829735	0.649088	0.0836617	0.646651	0.0833523	0.647217	0.0837533	0.663397	0.0839832	0.655379	0.084154	0.663853	0.0841909	0.659049	0.0842586
Linear	FALSE	0.659897	0.0830805	0.604119	0.0774053	0.61999	0.0790801	0.636018	0.0807574	0.652204	0.0824374	0.668551	0.08412	0.68506	0.0858052	0.701732	0.087493	0.633897	0.0804018	0.637536	0.0806352			0.634702	0.0815324	0.636853	0.0827876	0.63358	0.0830184	0.636806	0.0827302	0.651946	0.082534	0.644904	0.0826381	0.642271	0.0833742	0.642328	0.0830631	0.642155	0.083448	0.658285	0.0836907	0.651133	0.0837753	0.65964	0.083839	0.654883	0.0839658
Data Range	AC38:AG55	0.668328	0.0831099	0.603882	0.0773993	0.619746	0.0790739	0.635766	0.0807512	0.651945	0.082431	0.668284	0.0841135	0.684785	0.0857986	0.701449	0.0874863	0.637536	0.0807805	0.641183	0.0810133			0.629843	0.0810537	0.632056	0.0824448	0.627778	0.0826604	0.632399	0.082341	0.647619	0.0820565	0.641183	0.0822751	0.63599	0.0830351	0.638346	0.0827402	0.637492	0.0831025	0.653575	0.0833583	0.647224	0.0833698	0.655761	0.0834591	0.651046	0.0836414
Filled Symbols	TRUE	0.663455	0.083142	0.603664	0.0773896	0.619521	0.079064	0.635534	0.080741	0.651706	0.0824207	0.668038	0.0841029	0.684532	0.0857878	0.701188	0.0874752	0.641183	0.0811593	0.644838	0.0813915			0.62559	0.0805583	0.627855	0.0820738	0.622695	0.0822665	0.628541	0.0819308	0.643831	0.0815733	0.637925	0.0818986	0.630487	0.0826573	0.634859	0.0823961	0.633408	0.0827301	0.649451	0.082999	0.643802	0.0829533	0.652365	0.0830658	0.647686	0.0832978
ConcAge	TRUE	0.675225	0.0832628	0.603472	0.0773765	0.619323	0.0790507	0.635331	0.0807274	0.651497	0.0824067	0.667823	0.0840887	0.68431	0.0857732	0.70096	0.0874604	0.644838	0.0815382	0.648502	0.0817698			0.622105	0.0800652	0.62441	0.0816888	0.618526	0.0818519	0.625379	0.0815152	0.640728	0.081103	0.635256	0.081523	0.625973	0.0822553	0.632001	0.0820438	0.630059	0.0823451	0.646068	0.0826263	0.640999	0.0825417	0.649583	0.0826742	0.644932	0.0829482
ConcSwap	FALSE	0.679818	0.0837389	0.603315	0.0773606	0.619161	0.0790344	0.635164	0.0807108	0.651325	0.0823897	0.667646	0.0840713	0.684128	0.0857555	0.700773	0.0874423	0.648502	0.0819172	0.652173	0.0821483			0.619522	0.0795933	0.621855	0.0813047	0.615433	0.0814324	0.623034	0.0811103	0.638429	0.0806637	0.633278	0.0811627	0.622622	0.0818446	0.629881	0.081697	0.627575	0.0819623	0.643559	0.0822548	0.638922	0.0821507	0.647521	0.0822993	0.64289	0.082606
1st Symbol-row	1	0.677983	0.0842402	0.603199	0.0773425	0.619041	0.0790158	0.63504	0.0806918	0.651198	0.0823703	0.667514	0.0840515	0.683993	0.0857353	0.700634	0.0874217	0.652173	0.0822964	0.655853	0.0825269			0.617941	0.0791607	0.620286	0.080936	0.613532	0.0810242	0.621598	0.0807316	0.637023	0.0802723	0.632067	0.0808316	0.620563	0.0814409	0.628581	0.081369	0.626051	0.0815964	0.642019	0.0818986	0.637651	0.0817955	0.646258	0.0819555	0.641638	0.0822845
		0.672795	0.0842439	0.603127	0.0773227	0.618967	0.0789957	0.634964	0.0806712	0.651119	0.0823493	0.667434	0.08403	0.683909	0.0857134	0.700548	0.0873993	0.655853	0.0826757	0.65954	0.0829056			0.617422	0.0787842	0.619765	0.0805972	0.612898	0.0806429	0.621124	0.0803936	0.636563	0.0799438	0.631669	0.0805423	0.619874	0.0810599	0.628151	0.0810724	0.625546	0.0812614	0.641507	0.0815715	0.637235	0.0814897	0.645843	0.0816562	0.641225	0.0819959
		0.673232	0.084301	0.603103	0.0773023	0.618942	0.0789747	0.634938	0.0806498	0.651092	0.0823274	0.667406	0.0840077	0.683881	0.0856906	0.700519	0.087376	0.65954	0.0830551	0.663236	0.0832845			0.617985	0.078478	0.620311	0.080301	0.613556	0.0803034	0.621632	0.0801094	0.637068	0.0796908	0.632101	0.0803061	0.620582	0.080716	0.628607	0.0808186	0.626078	0.0809702	0.642043	0.081286	0.637689	0.081245	0.646293	0.0814127	0.641666	0.0817513
		IsoLine	IsoLine	0.603127	0.0772818	0.618967	0.0789538	0.634964	0.0806284	0.651119	0.0823056	0.667434	0.0839854	0.683909	0.0856678	0.700548	0.0873528	0.663236	0.0834347	0.666941	0.0836635			0.619609	0.0782541	0.621904	0.080059	0.615478	0.0800184	0.623101	0.0798898	0.638518	0.0795231	0.633344	0.080132	0.62266	0.0804226	0.629933	0.0806174	0.627627	0.0807341	0.643607	0.0810531	0.638998	0.0810709	0.647589	0.0812344	0.642944	0.0815602
				0.603199	0.0772621	0.619041	0.0789336	0.63504	0.0806078	0.651198	0.0822845	0.667514	0.0839639	0.683993	0.0856458	0.700634	0.0873304	0.666941	0.0838144	0.670653	0.0840426			0.622231	0.078121	0.624483	0.0798805	0.618593	0.0797992	0.625476	0.0797433	0.640857	0.079447	0.635352	0.0800266	0.626028	0.0801909	0.632076	0.0804764	0.630135	0.0805621	0.646138	0.0808817	0.641109	0.0809739	0.649683	0.0811282	0.64501	0.0814299
				0.603315	0.0772439	0.619161	0.078915	0.635164	0.0805888	0.651325	0.0822651	0.667646	0.0839441	0.684128	0.0856256	0.700773	0.0873098	0.670653	0.0841943	0.674374	0.0844219			0.625751	0.0780839	0.627947	0.0797722	0.622779	0.079654	0.628664	0.0796755	0.643996	0.0794656	0.638047	0.0799941	0.630557	0.0800298	0.634955	0.0804012	0.633504	0.0804607	0.649539	0.0807785	0.643942	0.080958	0.652493	0.0810982	0.647786	0.0813653
				0.603472	0.077228	0.619323	0.0788988	0.635331	0.0805722	0.651497	0.0822481	0.667823	0.0839267	0.68431	0.0856079	0.70096	0.0872917	0.674374	0.0845742	0.678103	0.0848013			0.630033	0.0781441	0.632165	0.0797384	0.627877	0.0795884	0.632545	0.0796891	0.647813	0.0795781	0.641326	0.0800357	0.636072	0.0799455	0.638459	0.0803945	0.637605	0.080434	0.653679	0.0807473	0.647389	0.0810236	0.655911	0.0811454	0.651163	0.0813691
				0.603664	0.0772149	0.619521	0.0788854	0.635534	0.0805585	0.651706	0.0822342	0.668038	0.0839125	0.684532	0.0855934	0.701188	0.0872769	0.678103	0.0849543	0.68184	0.0851808			0.634912	0.0782994	0.636973	0.0797804	0.63369	0.0796049	0.636967	0.0797835	0.652162	0.0797802	0.645063	0.0801497	0.642362	0.0799412	0.642454	0.0804567	0.64228	0.0804829	0.6584	0.0807895	0.651316	0.0811682	0.659806	0.0812682	0.655013	0.0814409
				0.603882	0.0772052	0.619746	0.0788755	0.635766	0.0805484	0.651945	0.0822238	0.668284	0.0839019	0.684785	0.0855826	0.701449	0.0872658	0.68184	0.0853346	0.685586	0.0855604			0.640202	0.0785437	0.642188	0.0798965	0.639995	0.079703	0.641762	0.0799551	0.656876	0.0800641	0.649113	0.0803318	0.649185	0.0800172	0.646785	0.0805853	0.64735	0.0806056	0.663519	0.0809033	0.655573	0.0813864	0.664029	0.0814617	0.659187	0.0815782
				0.604119	0.0771992	0.61999	0.0788694	0.636018	0.0805421	0.652204	0.0822175	0.668551	0.0838954	0.68506	0.0855759	0.701732	0.0872591	0.685586	0.085715	0.68934	0.0859402			0.645698	0.0788677	0.647609	0.0800823	0.646549	0.0798789	0.646745	0.0801972	0.661774	0.0804189	0.653323	0.0805751	0.656279	0.0801705	0.651287	0.0807755	0.65262	0.0807972	0.668841	0.0810844	0.659996	0.0816696	0.668418	0.0817186	0.663525	0.0817755
				0.604365	0.0771972	0.620244	0.0788673	0.636279	0.08054	0.652474	0.0822153	0.668829	0.0838932	0.685345	0.0855737	0.702025	0.0872568	0.68934	0.0860955	0.693102	0.0863202			0.65119	0.079259	0.653027	0.0803307	0.653101	0.0801257	0.651725	0.0805007	0.666667	0.0808309	0.657528	0.0808701	0.663371	0.0803951	0.655786	0.0810199	0.657888	0.0810506	0.67416	0.0813258	0.664416	0.0820071	0.672802	0.082029	0.667861	0.0820254
				0.604611	0.0771992	0.620497	0.0788694	0.636541	0.0805421	0.652743	0.0822175	0.669106	0.0838954	0.685631	0.0855759	0.702319	0.0872591	0.693102	0.0864761	0.696873	0.0867002			0.656467	0.0797025	0.658234	0.080632	0.659399	0.0804341	0.65651	0.0808537	0.671368	0.0812844	0.661569	0.0812055	0.670188	0.0806825	0.660109	0.0813091	0.66295	0.0813559	0.679273	0.0816183	0.668662	0.0823858	0.677015	0.0823809	0.672027	0.0823181
				0.604848	0.0772052	0.620742	0.0788755	0.636793	0.0805484	0.653003	0.0822238	0.669373	0.0839019	0.685906	0.0855826	0.702602	0.0872658	0.696873	0.0868569	0.700652	0.0870804			0.661325	0.0801811	0.663031	0.0809747	0.665201	0.0807921	0.660916	0.0812429	0.675696	0.081762	0.66529	0.0815684	0.676469	0.0810217	0.664091	0.081632	0.667613	0.0817013	0.683982	0.0819507	0.672571	0.0827912	0.680894	0.0827608	0.675864	0.0826426
				0.605066	0.0772149	0.620967	0.0788854	0.637024	0.0805585	0.653241	0.0822342	0.669619	0.0839125	0.686159	0.0855934	0.702863	0.0872769	0.700652	0.0872378	0.704439	0.0874607			0.665579	0.0806765	0.667232	0.0813458	0.670284	0.081186	0.664775	0.0816531	0.679484	0.0822451	0.668547	0.0819449	0.681972	0.0813995	0.667578	0.0819761	0.671697	0.0820737	0.688107	0.0823101	0.675993	0.0832078	0.68429	0.0831541	0.679224	0.0829862
				0.605258	0.077228	0.621164	0.0788988	0.637228	0.0805722	0.653451	0.0822481	0.669835	0.0839267	0.686381	0.0856079	0.703091	0.0872917	0.704439	0.0876188	0.708235	0.0878412			0.669064	0.0811696	0.670677	0.0817307	0.674453	0.0816007	0.667937	0.0820687	0.682587	0.0827154	0.671216	0.0823205	0.686485	0.0818015	0.670437	0.0823284	0.675045	0.0824587	0.691489	0.0826827	0.678796	0.0836194	0.687073	0.0835457	0.681978	0.0833358
				0.605415	0.0772439	0.621326	0.078915	0.637395	0.0805888	0.653623	0.0822651	0.670011	0.0839441	0.686563	0.0856256	0.703278	0.0873098	0.708235	0.088	0.709823	0.088			0.671646	0.0816415	0.673232	0.0821149	0.677547	0.0820202	0.670281	0.0824736	0.684886	0.0831547	0.673195	0.0826808	0.689836	0.0822122	0.672557	0.0826752	0.677529	0.0828416	0.693998	0.0830542	0.680873	0.0840104	0.689135	0.0839206	0.68402	0.0836779
				0.605531	0.0772621	0.621446	0.0789336	0.637518	0.0806078	0.65375	0.0822845	0.670143	0.0839639	0.686698	0.0856458	0.703417	0.0873304	0.708235	0.088	0.706657	0.088			0.673228	0.0820741	0.674801	0.0824836	0.679447	0.0824284	0.671718	0.0828523	0.686292	0.0835461	0.674406	0.083012	0.691896	0.0826158	0.673856	0.0830032	0.679054	0.0832075	0.695539	0.0834104	0.682144	0.0843656	0.690397	0.0842643	0.685272	0.0839995
				0.605603	0.0772818	0.62152	0.0789538	0.637595	0.0806284	0.653829	0.0823056	0.670224	0.0839854	0.686781	0.0856678	0.703503	0.0873528	IsoLine	IsoLine	0.704439	0.0877769			0.673747	0.0824507	0.675322	0.0828224	0.680081	0.0828096	0.672192	0.0831903	0.686751	0.0838746	0.674803	0.0833012	0.692585	0.0829969	0.674286	0.0832998	0.679559	0.0835425	0.69605	0.0837375	0.68256	0.0846714	0.690812	0.0845637	0.685685	0.0842881
				0.605627	0.0773023	0.621545	0.0789747	0.637621	0.0806498	0.653855	0.0823274	0.670251	0.0840077	0.68681	0.0856906	0.703532	0.087376			0.700652	0.0873951			ErrEll	ErrEll	ErrEll	ErrEll	ErrEll	ErrEll	ErrEll	ErrEll	ErrEll	ErrEll	ErrEll	ErrEll	ErrEll	ErrEll	ErrEll	ErrEll	ErrEll	ErrEll	ErrEll	ErrEll	ErrEll	ErrEll	ErrEll	ErrEll	ErrEll	ErrEll
				ConcTikEll	ConcTikEll	ConcTikEll	ConcTikEll	ConcTikEll	ConcTikEll	ConcTikEll	ConcTikEll	ConcTikEll	ConcTikEll	ConcTikEll	ConcTikEll	ConcTikEll	ConcTikEll			0.696873	0.0870135
																				0.693102	0.086632
																				0.68934	0.0862507
																				0.685586	0.0858695
																				0.68184	0.0854884
																				0.678103	0.0851074
																				0.674374	0.0847266
																				0.670653	0.0843459
																				0.666941	0.0839654
																				0.663236	0.083585
																				0.65954	0.0832047
																				0.655853	0.0828245
																				0.652173	0.0824445
																				0.648502	0.0820646
																				0.644838	0.0816849
																				0.641183	0.0813053
																				0.637536	0.0809258
																				0.633897	0.0805464
																				0.630267	0.0801672
																				0.626644	0.0797881
																				0.623029	0.0794092
																				0.619423	0.0790303
																				0.615824	0.0786517
																				0.612233	0.0782731
																				0.608651	0.0778947
																				0.605076	0.0775164
																				0.601509	0.0771382
																				0.600208	0.077
																				0.602818	0.077
																				ConcBand	ConcBand
[truncated: 12 more columns]

## Sheet: PlotDat9
Source sheet	all data	0.543268	0.0704828	0	0	0.217708	0.0315113	0	0.0510086	0.561702	0.0715944	0.581288	0.0739099	0.595389	0.0755062	0.607438	0.0762574	0.608658	0.0764523	0.60981	0.0765331	0.608066	0.0776071	0.627983	0.0773869	0.628889	0.0778906	0.628279	0.0785631	0.63268	0.0790882	0.634206	0.0786814	0.630115	0.0784608	0.635749	0.0790171	0.627594	0.0786956	0.627819	0.0791357	0.6311	0.0789481	0.62805	0.0798182	0.637261	0.0796657	0.643556	0.0789794
Plot name	Concordia7	0.564194	0.0726172	0.0862007	0.0131092	0.482812	0.0640155	8.37933	0.5	0.561334	0.0718048	0.580944	0.0740954	0.595005	0.075723	0.607067	0.0764621	0.608266	0.076669	0.609356	0.0767894	0.60763	0.0777918	0.627556	0.0776245	0.628463	0.078128	0.627869	0.0787739	0.632282	0.0792448	0.633858	0.0788531	0.629637	0.0787275	0.635337	0.0792261	0.627205	0.0789111	0.627431	0.0793464	0.63072	0.0791604	0.62768	0.0799565	0.636768	0.0799343	0.643016	0.0792604
Plot Type	1	0.576222	0.0742941	0.179832	0.0263902	0.805631	0.097544			0.560271	0.0719645	0.579956	0.074224	0.5939	0.0758848	0.606001	0.0766116	0.607137	0.0768267	0.608037	0.0769936	0.606382	0.0778871	0.626318	0.0778105	0.627231	0.0783084	0.626692	0.0789146	0.631144	0.0793199	0.632858	0.0789635	0.62825	0.0789413	0.634157	0.0793646	0.626084	0.0790692	0.626316	0.0794955	0.629625	0.07932	0.626621	0.080016	0.635349	0.080126	0.641437	0.0794958
1st free col	197	0.588954	0.0750241	0.281534	0.0398453	1.19873	0.132129			0.558555	0.0720672	0.578362	0.0742909	0.592115	0.0759855	0.604279	0.0767001	0.605315	0.0769195	0.605905	0.0771378	0.604371	0.0778896	0.624316	0.0779379	0.625241	0.0784246	0.624794	0.0789797	0.629308	0.0793106	0.631246	0.0790082	0.626005	0.0790937	0.632254	0.0794273	0.624275	0.0791638	0.624516	0.0795773	0.627856	0.079421	0.624913	0.0799943	0.633059	0.0802336	0.63888	0.0796763
Sigma Level	2	0.589097	0.0751361	0.392003	0.0534768	1.67741	0.167804			0.556252	0.072109	0.576224	0.0742935	0.58972	0.0760212	0.601969	0.0767242	0.60287	0.0769438	0.603041	0.0772165	0.601674	0.0777989	0.621628	0.0780016	0.62257	0.0784724	0.622248	0.0789667	0.626845	0.0792173	0.629084	0.0789856	0.62299	0.0791791	0.629701	0.0794118	0.621847	0.0791914	0.622102	0.0795885	0.625482	0.0794594	0.622622	0.0798924	0.629986	0.0802529	0.635442	0.0797951
Absolute Errs	FALSE	0.586862	0.0754333	0.511995	0.067287	2.2603	0.204603			0.55345	0.0720883	0.573623	0.0742316	0.586806	0.0759906	0.599158	0.0766829	0.599895	0.0768986	0.599555	0.0772266	0.598395	0.0776188	0.618356	0.0779993	0.61932	0.0784498	0.619151	0.0788761	0.623851	0.0790435	0.626454	0.0788964	0.61932	0.079194	0.626595	0.0793187	0.618894	0.0791507	0.619165	0.0795287	0.622593	0.0794336	0.619836	0.0797142	0.626249	0.0801831	0.631257	0.0798477
Symbol Type	1	0.58652	0.0754688	0.64233	0.0812782	2.97009	0.242562			0.550256	0.0720059	0.57066	0.0741077	0.583485	0.0758947	0.595955	0.0765779	0.596506	0.0767856	0.595581	0.0771679	0.594659	0.077356	0.614627	0.077931	0.615615	0.0783576	0.615623	0.0787114	0.620439	0.078796	0.623458	0.0787442	0.615136	0.079138	0.623057	0.0791516	0.615528	0.0790434	0.615819	0.0794004	0.619301	0.0793448	0.616662	0.0794664	0.62199	0.0800269	0.626484	0.079832
Inverse Plot	FALSE	0.606449	0.0762828	0.7839	0.0954529	3.83441	0.281716			0.546794	0.071865	0.567449	0.0739265	0.579885	0.0757374	0.592483	0.0764132	0.592831	0.0766093	0.591272	0.0770425	0.590611	0.0770207	0.610583	0.0777994	0.611599	0.0781996	0.611799	0.078479	0.616742	0.0784842	0.620211	0.0785348	0.610599	0.0790131	0.619223	0.0789168	0.61188	0.0788737	0.612192	0.0792083	0.615731	0.0791964	0.613222	0.0791586	0.617374	0.0797904	0.621307	0.0797486
Color Plot	TRUE	0.607504	0.0766413	0.937674	0.109813	4.8869	0.322105			0.543196	0.071671	0.564112	0.073695	0.576144	0.0755245	0.588875	0.0761951	0.589014	0.0763764	0.586794	0.0768552	0.586405	0.0766258	0.606381	0.0776095	0.607426	0.0779816	0.607826	0.0781877	0.612901	0.0781201	0.616837	0.0782762	0.605884	0.0788242	0.615239	0.0786235	0.608089	0.078648	0.608424	0.0789598	0.612023	0.0789939	0.609648	0.0788027	0.612578	0.0794826	0.615925	0.0796008
3D plot	FALSE	0.607924	0.0769479	1.1047	0.124362	6.16853	0.363766			0.539601	0.0714313	0.560779	0.0734221	0.572406	0.0752644	0.585271	0.075932	0.585199	0.0760958	0.582319	0.0766133	0.582204	0.0761863	0.602181	0.0773687	0.603256	0.0777121	0.603857	0.0778488	0.609063	0.0777177	0.613467	0.0779783	0.601171	0.0785786	0.611258	0.0782828	0.604301	0.078375	0.604659	0.0786646	0.608316	0.0787453	0.606078	0.0784124	0.607786	0.0791153	0.610546	0.0793941
Linear	FALSE	0.613	0.0771238	1.28613	0.139102	7.72917	0.40674			0.536147	0.0711551	0.557577	0.0731183	0.568815	0.074967	0.581808	0.0756339	0.581534	0.0757783	0.578018	0.0763261	0.578168	0.0757194	0.598145	0.077086	0.599248	0.0774015	0.600044	0.0774752	0.605377	0.0772925	0.610229	0.0776527	0.596642	0.0782856	0.607435	0.0779079	0.600662	0.0780653	0.601042	0.078334	0.604756	0.07846	0.602649	0.0780025	0.603182	0.0787027	0.605375	0.0791366
Data Range	AC3:AG95	0.616922	0.0772553	1.4832	0.154034	9.62957	0.451068			0.532966	0.0708531	0.554629	0.0727951	0.565509	0.0746438	0.578619	0.0753125	0.57816	0.0754361	0.574057	0.0760045	0.574454	0.0752427	0.594429	0.0767726	0.595559	0.0770617	0.596534	0.0770814	0.601984	0.0768609	0.607249	0.0773118	0.592471	0.0779566	0.603915	0.0775132	0.597311	0.0777306	0.597712	0.0779806	0.601477	0.0781491	0.599493	0.0775889	0.598944	0.0782606	0.600611	0.0788381
Filled Symbols	TRUE	0.605952	0.0773472	1.69725	0.169163	IsoLine	IsoLine			0.530182	0.0705369	0.552049	0.0724652	0.562614	0.0743071	0.575828	0.07498	0.575206	0.0750824	0.570588	0.075661	0.571203	0.0747748	0.591174	0.0764403	0.592328	0.0767057	0.593461	0.0766824	0.599014	0.0764393	0.60464	0.0769687	0.588818	0.0776042	0.600834	0.0771138	0.594378	0.0773839	0.594797	0.0776181	0.598606	0.0778244	0.59673	0.0771875	0.595234	0.077806	0.596438	0.0785101
ConcAge	FALSE	0.615337	0.0773922	1.92975	0.184489					0.5279	0.0702186	0.549935	0.0721411	0.560242	0.0739699	0.573541	0.0746492	0.572786	0.0747308	0.567744	0.0753088	0.568541	0.0743335	0.588506	0.0761019	0.58968	0.0763472	0.590945	0.0762937	0.596582	0.076044	0.602503	0.0766367	0.585823	0.0772418	0.59831	0.0767251	0.591974	0.0770385	0.592409	0.0772604	0.596254	0.0774985	0.594467	0.0768136	0.592194	0.0773564	0.593015	0.0781652
ConcSwap	FALSE	0.60817	0.0774176	2.1823	0.200017					0.526209	0.0699105	0.54837	0.0718353	0.558484	0.0736452	0.571847	0.0743327	0.570993	0.0743947	0.565636	0.0749613	0.56657	0.0739359	0.586528	0.0757705	0.587718	0.0760001	0.589081	0.0759301	0.59478	0.0756903	0.60092	0.0763284	0.583602	0.0768836	0.596441	0.0763621	0.590193	0.0767077	0.59064	0.0769212	0.59451	0.0771839	0.592792	0.0764818	0.589942	0.0769291	0.590475	0.0778168
1st Symbol-row	1	0.608511	0.0777425	2.45662	0.215748					0.525173	0.0696243	0.547412	0.0715595	0.557408	0.0733454	0.570809	0.0740429	0.569895	0.0740872	0.564343	0.0746319	0.565365	0.0735972	0.585316	0.0754588	0.586515	0.0756776	0.587941	0.0756056	0.593679	0.0753916	0.599953	0.0760557	0.58224	0.0765431	0.595297	0.0760386	0.589103	0.0764041	0.589557	0.0766135	0.593442	0.0768926	0.591767	0.0762046	0.588564	0.0765404	0.588915	0.077478
		0.612096	0.077792	2.75458	0.231686					0.524833	0.0693711	0.5471	0.0713244	0.557055	0.0730821	0.570469	0.0737907	0.569536	0.0738199	0.563915	0.0743334	0.564974	0.0733304	0.584915	0.0751787	0.58612	0.0753921	0.587569	0.0753327	0.59332	0.0751595	0.599637	0.0758292	0.581789	0.0762335	0.594924	0.0757672	0.588746	0.0761395	0.589204	0.0763492	0.593092	0.0766359	0.591434	0.0759928	0.588113	0.0762053	0.588395	0.0771621
		0.609742	0.0779055	3.07823	0.247832					0.525201	0.0691607	0.547444	0.0711389	0.557438	0.0728653	0.57084	0.073586	0.569928	0.0736033	0.564369	0.0740771	0.56541	0.0731457	0.585342	0.0749411	0.586546	0.0751546	0.587979	0.0751218	0.593718	0.0750029	0.599986	0.0756574	0.582267	0.0759668	0.595336	0.0755582	0.589135	0.075924	0.589592	0.0761385	0.593471	0.0764237	0.591804	0.0758545	0.588607	0.0759368	0.588935	0.0768811
		0.612687	0.0779355	3.42977	0.26419					0.526264	0.069001	0.548432	0.0710103	0.558544	0.0727035	0.571906	0.0734365	0.571057	0.0734455	0.565688	0.073873	0.566658	0.0730504	0.58658	0.0747551	0.587778	0.0749743	0.589156	0.0749812	0.594856	0.0749278	0.600985	0.075547	0.583654	0.0757531	0.596516	0.0754197	0.590255	0.0757659	0.590707	0.0759894	0.594566	0.076264	0.592863	0.0757951	0.590025	0.075745	0.590514	0.0766457
		0.615976	0.0780708	3.81162	0.280763					0.52798	0.0688983	0.550026	0.0709434	0.560328	0.0726028	0.573628	0.073348	0.572879	0.0733527	0.56782	0.0737288	0.568669	0.073048	0.588582	0.0746277	0.589767	0.074858	0.591054	0.0749161	0.596692	0.074937	0.602597	0.0755023	0.585899	0.0756006	0.598419	0.075357	0.592064	0.0756713	0.592506	0.0759077	0.596335	0.076163	0.594572	0.0758167	0.592315	0.0756374	0.593071	0.0764652
		0.614413	0.0780971	4.22639	0.297552					0.530283	0.0688565	0.552164	0.0709409	0.562724	0.0725671	0.575939	0.0733239	0.575324	0.0733284	0.570684	0.0736501	0.571366	0.0731386	0.59127	0.074564	0.592439	0.0748102	0.5936	0.0749291	0.599155	0.0750304	0.604759	0.075525	0.588914	0.0755153	0.600972	0.0753725	0.594492	0.0756438	0.594921	0.0758965	0.598709	0.0761247	0.596863	0.0759186	0.595388	0.0756182	0.596509	0.0763464
		0.617471	0.0782169	4.67691	0.314562					0.533086	0.0688772	0.554765	0.0710027	0.565638	0.0725977	0.578749	0.0733652	0.578299	0.0733736	0.57417	0.0736399	0.574645	0.0733187	0.594542	0.0745663	0.595689	0.0748329	0.596697	0.0750196	0.602149	0.0752041	0.607389	0.0756141	0.592584	0.0755003	0.604078	0.0754656	0.597446	0.0756844	0.597858	0.0759562	0.601598	0.0761504	0.599649	0.0760969	0.599125	0.0756879	0.600695	0.0762938
		0.617646	0.0783104	5.16626	0.331795					0.536279	0.0689596	0.557727	0.0711266	0.568959	0.0726936	0.581952	0.0734702	0.581688	0.0734866	0.578144	0.0736986	0.578381	0.0735815	0.598271	0.0746346	0.599393	0.074925	0.600225	0.0751843	0.605561	0.0754517	0.610385	0.0757663	0.596768	0.0755564	0.607616	0.0756328	0.600811	0.0757917	0.601204	0.0760846	0.604891	0.0762392	0.602822	0.0763446	0.603384	0.0758441	0.605468	0.0763095
		0.613936	0.0783423	5.69779	0.349254					0.539741	0.0691005	0.560939	0.0713078	0.572559	0.0728509	0.585424	0.0736349	0.585363	0.0736629	0.582452	0.0738241	0.582429	0.0739168	0.602315	0.0747662	0.603409	0.0750831	0.604049	0.0754168	0.609258	0.0757635	0.613632	0.0759757	0.601305	0.0756812	0.61145	0.0758675	0.60446	0.0759614	0.604831	0.0762767	0.60846	0.0763877	0.606262	0.0766524	0.608	0.0760806	0.610644	0.0763929
		0.620353	0.0784793	6.27515	0.366941					0.543339	0.0692945	0.564275	0.0715393	0.5763	0.0730637	0.589032	0.073853	0.58918	0.0738959	0.586931	0.0740113	0.586635	0.0743118	0.606517	0.0749561	0.607583	0.075301	0.608022	0.0757081	0.613099	0.0761275	0.617006	0.0762343	0.60602	0.0758701	0.615435	0.0761609	0.608251	0.0761871	0.608599	0.0765251	0.612169	0.0765901	0.609836	0.0770083	0.612796	0.0763885	0.616026	0.0765407
		0.627577	0.0785434	6.90227	0.384861					0.546934	0.0695342	0.567609	0.0718122	0.580037	0.0733239	0.592636	0.0741162	0.592995	0.0741765	0.591406	0.0742532	0.590836	0.0747512	0.610717	0.075197	0.611753	0.0755705	0.611992	0.076047	0.616937	0.0765299	0.620376	0.0765322	0.610733	0.0761157	0.619415	0.0765016	0.612039	0.0764601	0.612364	0.0768203	0.615875	0.0768388	0.613406	0.0773987	0.617588	0.0767557	0.621406	0.0767474
		0.616062	0.0786652	7.58345	0.403015					0.550388	0.0698104	0.570811	0.0721161	0.583629	0.0736212	0.596099	0.0744142	0.59666	0.0744939	0.595707	0.0745404	0.594871	0.0752182	0.614752	0.0754796	0.61576	0.0758811	0.615805	0.0764205	0.620623	0.0769551	0.623614	0.0768578	0.615262	0.0764087	0.623238	0.0768765	0.615678	0.0767699	0.615981	0.077151	0.619436	0.077124	0.616835	0.0778086	0.622192	0.0771683	0.626577	0.0770049
		0.626026	0.0788663	8.32335	0.421407					0.553569	0.0701124	0.573759	0.0724392	0.586935	0.0739445	0.599288	0.0747356	0.600034	0.0748361	0.599668	0.074862	0.598586	0.0756948	0.618469	0.075793	0.61945	0.0762209	0.619315	0.0768144	0.624016	0.0773868	0.626594	0.0771987	0.619433	0.0767377	0.626758	0.0772712	0.619029	0.0771045	0.619311	0.0775043	0.622715	0.077435	0.619991	0.0782221	0.62643	0.0776104	0.631341	0.0773034
		0.622418	0.0789869	9.12703	0.440041					0.556353	0.0704286	0.576339	0.0727691	0.58983	0.0742812	0.602079	0.0750681	0.602988	0.0751898	0.603137	0.0752055	0.601836	0.0761627	0.621724	0.0761253	0.622681	0.0765769	0.622387	0.0772133	0.626986	0.0778083	0.629203	0.0775418	0.623086	0.0770902	0.629839	0.0776706	0.621962	0.0774512	0.622226	0.0778668	0.625585	0.0777596	0.622754	0.0786236	0.63014	0.078065	0.635514	0.0776314
		0.630702	0.0791442	9.99999	0.458919					0.558635	0.0707469	0.578453	0.0730932	0.592202	0.0746184	0.604366	0.075399	0.605408	0.0755414	0.60598	0.0755578	0.604499	0.076604	0.624391	0.0764637	0.625328	0.0769354	0.624903	0.0776021	0.629418	0.0782036	0.63134	0.0778738	0.62608	0.0774525	0.632363	0.0780592	0.624365	0.0777966	0.624614	0.0782246	0.627938	0.0780855	0.625017	0.0789974	0.63318	0.0785146	0.638936	0.0779763
		0.627837	0.0794074	10	0.458919					0.560326	0.0710551	0.580018	0.073399	0.593959	0.0749431	0.606061	0.0757154	0.607201	0.0758775	0.608089	0.0759053	0.60647	0.0770016	0.62637	0.0767951	0.627291	0.0772826	0.626767	0.0779657	0.63122	0.0785574	0.632923	0.0781821	0.628302	0.0778108	0.634232	0.0784223	0.626146	0.0781275	0.626383	0.0785638	0.629681	0.0784002	0.626692	0.0793293	0.635432	0.078942	0.641476	0.0783247
		0.627445	0.0794482	IsoLine	IsoLine					0.561362	0.0713412	0.580976	0.0736748	0.595036	0.0752429	0.607098	0.0760052	0.608299	0.076185	0.609382	0.0762346	0.607674	0.0773403	0.627582	0.0771068	0.628493	0.0776051	0.627907	0.0782902	0.632321	0.078856	0.633891	0.0784548	0.629664	0.0781512	0.635376	0.0787457	0.627236	0.078431	0.627465	0.0788715	0.630749	0.0786914	0.627717	0.0796064	0.63681	0.0793306	0.643036	0.0786635
		0.628419	0.0796324							0.561702	0.0715944	0.581288	0.0739099	0.595389	0.0755062	0.607438	0.0762574	0.608658	0.0764523	0.60981	0.0765331	0.608066	0.0776071	0.627983	0.0773869	0.628889	0.0778906	0.628279	0.0785631	0.63268	0.0790882	0.634206	0.0786814	0.630115	0.0784608	0.635749	0.0790171	0.627594	0.0786956	0.627819	0.0791357	0.6311	0.0789481	0.62805	0.0798182	0.637261	0.0796657	0.643556	0.0789794
		0.634064	0.0799752							ErrEll	ErrEll	ErrEll	ErrEll	ErrEll	ErrEll	ErrEll	ErrEll	ErrEll	ErrEll	ErrEll	ErrEll	ErrEll	ErrEll	ErrEll	ErrEll	ErrEll	ErrEll	ErrEll	ErrEll	ErrEll	ErrEll	ErrEll	ErrEll	ErrEll	ErrEll	ErrEll	ErrEll	ErrEll	ErrEll	ErrEll	ErrEll	ErrEll	ErrEll	ErrEll	ErrEll	ErrEll	ErrEll	ErrEll	ErrEll
		0.63402	0.0804063
		0.645584	0.0806174
		0.647543	0.0817098
		0.64649	0.0817263
		0.646658	0.0817919
		0.661657	0.0819092
		0.653236	0.0819218
		0.656229	0.0820284
		0.651219	0.0821861
		0.652552	0.0824019
		0.668779	0.0826545
		0.659897	0.0830805
		0.668328	0.0831099
		0.663455	0.083142
		0.675225	0.0832628
		0.679818	0.0837389
		0.677983	0.0842402
		0.672795	0.0842439
		0.673232	0.084301
		0.67391	0.0858375
		0.695152	0.0860132
		0.692123	0.0861469
		0.70755	0.0863071
		0.693081	0.0864143
		0.711399	0.0874097
		0.720794	0.0890088
		0.725835	0.0902176
		0.753207	0.0928383
		0.779829	0.0932266
		0.774811	0.094547
		0.811511	0.0981943
		0.815389	0.0984175
		0.822066	0.0991525
		0.842689	0.0994331
		0.838913	0.0996185
		0.841836	0.100754
		0.851155	0.100795
		0.857444	0.10122
		0.849761	0.101816
		0.869997	0.102453
		0.873678	0.102961
		0.867425	0.103429
		0.874088	0.104046
		0.891484	0.105156
		0.933409	0.109408
		0.956699	0.110406
		0.98423	0.112942
		1.00864	0.115596
		1.14092	0.127655
		1.16029	0.129011
		1.29701	0.141323
		1.51175	0.157026
		1.65012	0.161607
		1.6154	0.16335
		1.75007	0.175483
		1.75177	0.170994
		1.85549	0.179883
		1.96952	0.187219
		7.40758	0.39959
		IsoLine	IsoLine
[truncated: 146 more columns]

## Sheet: PlotDat5
Source sheet	all data	0.543268	0.0704828	0.282745	0.04	0.217708	0.0315113	0.561702	0.0715944	0.581288	0.0739099	0.595389	0.0755062	0.607438	0.0762574	0.608658	0.0764523	0.60981	0.0765331	0.608066	0.0776071	0.627983	0.0773869	0.628889	0.0778906	0.628279	0.0785631	0.63268	0.0790882	0.634206	0.0786814	0.630115	0.0784608	0.635749	0.0790171	0.627594	0.0786956	0.627819	0.0791357	0.6311	0.0789481	0.62805	0.0798182	0.637261	0.0796657	0.643556	0.0789794	0.639141	0.079569
Plot name	Concordia7	0.564194	0.0726172	0.282745	0.04	0.343738	0.0476374	0.561334	0.0718048	0.580944	0.0740954	0.595005	0.075723	0.607067	0.0764621	0.608266	0.076669	0.609356	0.0767894	0.60763	0.0777918	0.627556	0.0776245	0.628463	0.078128	0.627869	0.0787739	0.632282	0.0792448	0.633858	0.0788531	0.629637	0.0787275	0.635337	0.0792261	0.627205	0.0789111	0.627431	0.0793464	0.63072	0.0791604	0.62768	0.0799565	0.636768	0.0799343	0.643016	0.0792604	0.638648	0.0798456
Plot Type	1	0.576222	0.0742941	0.320882	0.0448103	0.482812	0.0640155	0.560271	0.0719645	0.579956	0.074224	0.5939	0.0758848	0.606001	0.0766116	0.607137	0.0768267	0.608037	0.0769936	0.606382	0.0778871	0.626318	0.0778105	0.627231	0.0783084	0.626692	0.0789146	0.631144	0.0793199	0.632858	0.0789635	0.62825	0.0789413	0.634157	0.0793646	0.626084	0.0790692	0.626316	0.0794955	0.629625	0.07932	0.626621	0.080016	0.635349	0.080126	0.641437	0.0794958	0.637223	0.0800549
1st free col	185	0.588954	0.0750241	0.360152	0.0496428	0.636279	0.0806498	0.558555	0.0720672	0.578362	0.0742909	0.592115	0.0759855	0.604279	0.0767001	0.605315	0.0769195	0.605905	0.0771378	0.604371	0.0778896	0.624316	0.0779379	0.625241	0.0784246	0.624794	0.0789797	0.629308	0.0793106	0.631246	0.0790082	0.626005	0.0790937	0.632254	0.0794273	0.624275	0.0791638	0.624516	0.0795773	0.627856	0.079421	0.624913	0.0799943	0.633059	0.0802336	0.63888	0.0796763	0.634922	0.080189
Sigma Level	2	0.589097	0.0751361	0.400589	0.0544976	0.805631	0.097544	0.556252	0.072109	0.576224	0.0742935	0.58972	0.0760212	0.601969	0.0767242	0.60287	0.0769438	0.603041	0.0772165	0.601674	0.0777989	0.621628	0.0780016	0.62257	0.0784724	0.622248	0.0789667	0.626845	0.0792173	0.629084	0.0789856	0.62299	0.0791791	0.629701	0.0794118	0.621847	0.0791914	0.622102	0.0795885	0.625482	0.0794594	0.622622	0.0798924	0.629986	0.0802529	0.635442	0.0797951	0.631833	0.0802428
Absolute Errs	FALSE	0.586862	0.0754333	0.442229	0.059375	0.99251	0.114702	0.55345	0.0720883	0.573623	0.0742316	0.586806	0.0759906	0.599158	0.0766829	0.599895	0.0768986	0.599555	0.0772266	0.598395	0.0776188	0.618356	0.0779993	0.61932	0.0784498	0.619151	0.0788761	0.623851	0.0790435	0.626454	0.0788964	0.61932	0.079194	0.626595	0.0793187	0.618894	0.0791507	0.619165	0.0795287	0.622593	0.0794336	0.619836	0.0797142	0.626249	0.0801831	0.631257	0.0798477	0.628074	0.080214
Symbol Type	1	0.58652	0.0754688	0.485107	0.0642748	1.19873	0.132129	0.550256	0.0720059	0.57066	0.0741077	0.583485	0.0758947	0.595955	0.0765779	0.596506	0.0767856	0.595581	0.0771679	0.594659	0.077356	0.614627	0.077931	0.615615	0.0783576	0.615623	0.0787114	0.620439	0.078796	0.623458	0.0787442	0.615136	0.079138	0.623057	0.0791516	0.615528	0.0790434	0.615819	0.0794004	0.619301	0.0793448	0.616662	0.0794664	0.62199	0.0800269	0.626484	0.079832	0.62379	0.0801039
Inverse Plot	FALSE	0.606449	0.0762828	0.52926	0.0691974	1.42629	0.149828	0.546794	0.071865	0.567449	0.0739265	0.579885	0.0757374	0.592483	0.0764132	0.592831	0.0766093	0.591272	0.0770425	0.590611	0.0770207	0.610583	0.0777994	0.611599	0.0781996	0.611799	0.078479	0.616742	0.0784842	0.620211	0.0785348	0.610599	0.0790131	0.619223	0.0789168	0.61188	0.0788737	0.612192	0.0792083	0.615731	0.0791964	0.613222	0.0791586	0.617374	0.0797904	0.621307	0.0797486	0.619146	0.0799167
Color Plot	TRUE	0.607504	0.0766413	0.574725	0.0741427	1.67741	0.167804	0.543196	0.071671	0.564112	0.073695	0.576144	0.0755245	0.588875	0.0761951	0.589014	0.0763764	0.586794	0.0768552	0.586405	0.0766258	0.606381	0.0776095	0.607426	0.0779816	0.607826	0.0781877	0.612901	0.0781201	0.616837	0.0782762	0.605884	0.0788242	0.615239	0.0786235	0.608089	0.078648	0.608424	0.0789598	0.612023	0.0789939	0.609648	0.0788027	0.612578	0.0794826	0.615925	0.0796008	0.61432	0.0796596
3D plot	FALSE	0.607924	0.0769479	0.621542	0.0791109	1.95452	0.186061	0.539601	0.0714313	0.560779	0.0734221	0.572406	0.0752644	0.585271	0.075932	0.585199	0.0760958	0.582319	0.0766133	0.582204	0.0761863	0.602181	0.0773687	0.603256	0.0777121	0.603857	0.0778488	0.609063	0.0777177	0.613467	0.0779783	0.601171	0.0785786	0.611258	0.0782828	0.604301	0.078375	0.604659	0.0786646	0.608316	0.0787453	0.606078	0.0784124	0.607786	0.0791153	0.610546	0.0793941	0.609498	0.0793424
Linear	FALSE	0.613	0.0771238	0.669751	0.084102	IsoLine	IsoLine	0.536147	0.0711551	0.557577	0.0731183	0.568815	0.074967	0.581808	0.0756339	0.581534	0.0757783	0.578018	0.0763261	0.578168	0.0757194	0.598145	0.077086	0.599248	0.0774015	0.600044	0.0774752	0.605377	0.0772925	0.610229	0.0776527	0.596642	0.0782856	0.607435	0.0779079	0.600662	0.0780653	0.601042	0.078334	0.604756	0.07846	0.602649	0.0780025	0.603182	0.0787027	0.605375	0.0791366	0.604864	0.0789774
Data Range	AC3:AG90	0.616922	0.0772553	0.719393	0.0891163			0.532966	0.0708531	0.554629	0.0727951	0.565509	0.0746438	0.578619	0.0753125	0.57816	0.0754361	0.574057	0.0760045	0.574454	0.0752427	0.594429	0.0767726	0.595559	0.0770617	0.596534	0.0770814	0.601984	0.0768609	0.607249	0.0773118	0.592471	0.0779566	0.603915	0.0775132	0.597311	0.0777306	0.597712	0.0779806	0.601477	0.0781491	0.599493	0.0775889	0.598944	0.0782606	0.600611	0.0788381	0.600598	0.0785785
Filled Symbols	TRUE	0.605952	0.0773472	0.770511	0.0941537			0.530182	0.0705369	0.552049	0.0724652	0.562614	0.0743071	0.575828	0.07498	0.575206	0.0750824	0.570588	0.075661	0.571203	0.0747748	0.591174	0.0764403	0.592328	0.0767057	0.593461	0.0766824	0.599014	0.0764393	0.60464	0.0769687	0.588818	0.0776042	0.600834	0.0771138	0.594378	0.0773839	0.594797	0.0776181	0.598606	0.0778244	0.59673	0.0771875	0.595234	0.077806	0.596438	0.0785101	0.596862	0.0781612
ConcAge	FALSE	0.615337	0.0773922	0.823149	0.0992145			0.5279	0.0702186	0.549935	0.0721411	0.560242	0.0739699	0.573541	0.0746492	0.572786	0.0747308	0.567744	0.0753088	0.568541	0.0743335	0.588506	0.0761019	0.58968	0.0763472	0.590945	0.0762937	0.596582	0.076044	0.602503	0.0766367	0.585823	0.0772418	0.59831	0.0767251	0.591974	0.0770385	0.592409	0.0772604	0.596254	0.0774985	0.594467	0.0768136	0.592194	0.0773564	0.593015	0.0781652	0.593801	0.0777413
ConcSwap	FALSE	0.60817	0.0774176	0.877352	0.104299			0.526209	0.0699105	0.54837	0.0718353	0.558484	0.0736452	0.571847	0.0743327	0.570993	0.0743947	0.565636	0.0749613	0.56657	0.0739359	0.586528	0.0757705	0.587718	0.0760001	0.589081	0.0759301	0.59478	0.0756903	0.60092	0.0763284	0.583602	0.0768836	0.596441	0.0763621	0.590193	0.0767077	0.59064	0.0769212	0.59451	0.0771839	0.592792	0.0764818	0.589942	0.0769291	0.590475	0.0778168	0.591532	0.0773352
1st Symbol-row	1	0.608511	0.0777425	0.933166	0.109406			0.525173	0.0696243	0.547412	0.0715595	0.557408	0.0733454	0.570809	0.0740429	0.569895	0.0740872	0.564343	0.0746319	0.565365	0.0735972	0.585316	0.0754588	0.586515	0.0756776	0.587941	0.0756056	0.593679	0.0753916	0.599953	0.0760557	0.58224	0.0765431	0.595297	0.0760386	0.589103	0.0764041	0.589557	0.0766135	0.593442	0.0768926	0.591767	0.0762046	0.588564	0.0765404	0.588915	0.077478	0.590142	0.0769583
		0.612096	0.077792	0.990639	0.114538			0.524833	0.0693711	0.5471	0.0713244	0.557055	0.0730821	0.570469	0.0737907	0.569536	0.0738199	0.563915	0.0743334	0.564974	0.0733304	0.584915	0.0751787	0.58612	0.0753921	0.587569	0.0753327	0.59332	0.0751595	0.599637	0.0758292	0.581789	0.0762335	0.594924	0.0757672	0.588746	0.0761395	0.589204	0.0763492	0.593092	0.0766359	0.591434	0.0759928	0.588113	0.0762053	0.588395	0.0771621	0.589685	0.0766252
		0.609742	0.0779055	1.04982	0.119693			0.525201	0.0691607	0.547444	0.0711389	0.557438	0.0728653	0.57084	0.073586	0.569928	0.0736033	0.564369	0.0740771	0.56541	0.0731457	0.585342	0.0749411	0.586546	0.0751546	0.587979	0.0751218	0.593718	0.0750029	0.599986	0.0756574	0.582267	0.0759668	0.595336	0.0755582	0.589135	0.075924	0.589592	0.0761385	0.593471	0.0764237	0.591804	0.0758545	0.588607	0.0759368	0.588935	0.0768811	0.590179	0.0763487
		0.612687	0.0779355	1.11076	0.124871			0.526264	0.069001	0.548432	0.0710103	0.558544	0.0727035	0.571906	0.0734365	0.571057	0.0734455	0.565688	0.073873	0.566658	0.0730504	0.58658	0.0747551	0.587778	0.0749743	0.589156	0.0749812	0.594856	0.0749278	0.600985	0.075547	0.583654	0.0757531	0.596516	0.0754197	0.590255	0.0757659	0.590707	0.0759894	0.594566	0.076264	0.592863	0.0757951	0.590025	0.075745	0.590514	0.0766457	0.591603	0.0761393
		0.615976	0.0780708	1.17352	0.130074			0.52798	0.0688983	0.550026	0.0709434	0.560328	0.0726028	0.573628	0.073348	0.572879	0.0733527	0.56782	0.0737288	0.568669	0.073048	0.588582	0.0746277	0.589767	0.074858	0.591054	0.0749161	0.596692	0.074937	0.602597	0.0755023	0.585899	0.0756006	0.598419	0.075357	0.592064	0.0756713	0.592506	0.0759077	0.596335	0.076163	0.594572	0.0758167	0.592315	0.0756374	0.593071	0.0764652	0.593905	0.0760052
		0.614413	0.0780971	1.23814	0.135301			0.530283	0.0688565	0.552164	0.0709409	0.562724	0.0725671	0.575939	0.0733239	0.575324	0.0733284	0.570684	0.0736501	0.571366	0.0731386	0.59127	0.074564	0.592439	0.0748102	0.5936	0.0749291	0.599155	0.0750304	0.604759	0.075525	0.588914	0.0755153	0.600972	0.0753725	0.594492	0.0756438	0.594921	0.0758965	0.598709	0.0761247	0.596863	0.0759186	0.595388	0.0756182	0.596509	0.0763464	0.596994	0.0759515
		0.617471	0.0782169	1.30468	0.140552			0.533086	0.0688772	0.554765	0.0710027	0.565638	0.0725977	0.578749	0.0733652	0.578299	0.0733736	0.57417	0.0736399	0.574645	0.0733187	0.594542	0.0745663	0.595689	0.0748329	0.596697	0.0750196	0.602149	0.0752041	0.607389	0.0756141	0.592584	0.0755003	0.604078	0.0754656	0.597446	0.0756844	0.597858	0.0759562	0.601598	0.0761504	0.599649	0.0760969	0.599125	0.0756879	0.600695	0.0762938	0.600753	0.0759802
		0.617646	0.0783104	1.3732	0.145828			0.536279	0.0689596	0.557727	0.0711266	0.568959	0.0726936	0.581952	0.0734702	0.581688	0.0734866	0.578144	0.0736986	0.578381	0.0735815	0.598271	0.0746346	0.599393	0.074925	0.600225	0.0751843	0.605561	0.0754517	0.610385	0.0757663	0.596768	0.0755564	0.607616	0.0756328	0.600811	0.0757917	0.601204	0.0760846	0.604891	0.0762392	0.602822	0.0763446	0.603384	0.0758441	0.605468	0.0763095	0.605036	0.0760903
		0.613936	0.0783423	1.44375	0.151127			0.539741	0.0691005	0.560939	0.0713078	0.572559	0.0728509	0.585424	0.0736349	0.585363	0.0736629	0.582452	0.0738241	0.582429	0.0739168	0.602315	0.0747662	0.603409	0.0750831	0.604049	0.0754168	0.609258	0.0757635	0.613632	0.0759757	0.601305	0.0756812	0.61145	0.0758675	0.60446	0.0759614	0.604831	0.0762767	0.60846	0.0763877	0.606262	0.0766524	0.608	0.0760806	0.610644	0.0763929	0.60968	0.0762775
		0.620353	0.0784793	1.5164	0.156452			0.543339	0.0692945	0.564275	0.0715393	0.5763	0.0730637	0.589032	0.073853	0.58918	0.0738959	0.586931	0.0740113	0.586635	0.0743118	0.606517	0.0749561	0.607583	0.075301	0.608022	0.0757081	0.613099	0.0761275	0.617006	0.0762343	0.60602	0.0758701	0.615435	0.0761609	0.608251	0.0761871	0.608599	0.0765251	0.612169	0.0765901	0.609836	0.0770083	0.612796	0.0763885	0.616026	0.0765407	0.614506	0.0765346
		0.627577	0.0785434	1.59122	0.1618			0.546934	0.0695342	0.567609	0.0718122	0.580037	0.0733239	0.592636	0.0741162	0.592995	0.0741765	0.591406	0.0742532	0.590836	0.0747512	0.610717	0.075197	0.611753	0.0755705	0.611992	0.076047	0.616937	0.0765299	0.620376	0.0765322	0.610733	0.0761157	0.619415	0.0765016	0.612039	0.0764601	0.612364	0.0768203	0.615875	0.0768388	0.613406	0.0773987	0.617588	0.0767557	0.621406	0.0767474	0.619329	0.0768518
		0.616062	0.0786652	1.66826	0.167174			0.550388	0.0698104	0.570811	0.0721161	0.583629	0.0736212	0.596099	0.0744142	0.59666	0.0744939	0.595707	0.0745404	0.594871	0.0752182	0.614752	0.0754796	0.61576	0.0758811	0.615805	0.0764205	0.620623	0.0769551	0.623614	0.0768578	0.615262	0.0764087	0.623238	0.0768765	0.615678	0.0767699	0.615981	0.077151	0.619436	0.077124	0.616835	0.0778086	0.622192	0.0771683	0.626577	0.0770049	0.623962	0.0772168
		0.626026	0.0788663	1.74758	0.172573			0.553569	0.0701124	0.573759	0.0724392	0.586935	0.0739445	0.599288	0.0747356	0.600034	0.0748361	0.599668	0.074862	0.598586	0.0756948	0.618469	0.075793	0.61945	0.0762209	0.619315	0.0768144	0.624016	0.0773868	0.626594	0.0771987	0.619433	0.0767377	0.626758	0.0772712	0.619029	0.0771045	0.619311	0.0775043	0.622715	0.077435	0.619991	0.0782221	0.62643	0.0776104	0.631341	0.0773034	0.628229	0.0776157
		0.622418	0.0789869	1.82927	0.177996			0.556353	0.0704286	0.576339	0.0727691	0.58983	0.0742812	0.602079	0.0750681	0.602988	0.0751898	0.603137	0.0752055	0.601836	0.0761627	0.621724	0.0761253	0.622681	0.0765769	0.622387	0.0772133	0.626986	0.0778083	0.629203	0.0775418	0.623086	0.0770902	0.629839	0.0776706	0.621962	0.0774512	0.622226	0.0778668	0.625585	0.0777596	0.622754	0.0786236	0.63014	0.078065	0.635514	0.0776314	0.631964	0.078033
		0.630702	0.0791442	1.91338	0.183445			0.558635	0.0707469	0.578453	0.0730932	0.592202	0.0746184	0.604366	0.075399	0.605408	0.0755414	0.60598	0.0755578	0.604499	0.076604	0.624391	0.0764637	0.625328	0.0769354	0.624903	0.0776021	0.629418	0.0782036	0.63134	0.0778738	0.62608	0.0774525	0.632363	0.0780592	0.624365	0.0777966	0.624614	0.0782246	0.627938	0.0780855	0.625017	0.0789974	0.63318	0.0785146	0.638936	0.0779763	0.635025	0.0784529
		0.627837	0.0794074	2	0.188918			0.560326	0.0710551	0.580018	0.073399	0.593959	0.0749431	0.606061	0.0757154	0.607201	0.0758775	0.608089	0.0759053	0.60647	0.0770016	0.62637	0.0767951	0.627291	0.0772826	0.626767	0.0779657	0.63122	0.0785574	0.632923	0.0781821	0.628302	0.0778108	0.634232	0.0784223	0.626146	0.0781275	0.626383	0.0785638	0.629681	0.0784002	0.626692	0.0793293	0.635432	0.078942	0.641476	0.0783247	0.637295	0.078859
		0.627445	0.0794482	2	0.188918			0.561362	0.0713412	0.580976	0.0736748	0.595036	0.0752429	0.607098	0.0760052	0.608299	0.076185	0.609382	0.0762346	0.607674	0.0773403	0.627582	0.0771068	0.628493	0.0776051	0.627907	0.0782902	0.632321	0.078856	0.633891	0.0784548	0.629664	0.0781512	0.635376	0.0787457	0.627236	0.078431	0.627465	0.0788715	0.630749	0.0786914	0.627717	0.0796064	0.63681	0.0793306	0.643036	0.0786635	0.638684	0.0792359
		0.628419	0.0796324	IsoLine	IsoLine			0.561702	0.0715944	0.581288	0.0739099	0.595389	0.0755062	0.607438	0.0762574	0.608658	0.0764523	0.60981	0.0765331	0.608066	0.0776071	0.627983	0.0773869	0.628889	0.0778906	0.628279	0.0785631	0.63268	0.0790882	0.634206	0.0786814	0.630115	0.0784608	0.635749	0.0790171	0.627594	0.0786956	0.627819	0.0791357	0.6311	0.0789481	0.62805	0.0798182	0.637261	0.0796657	0.643556	0.0789794	0.639141	0.079569
		0.634064	0.0799752					ErrEll	ErrEll	ErrEll	ErrEll	ErrEll	ErrEll	ErrEll	ErrEll	ErrEll	ErrEll	ErrEll	ErrEll	ErrEll	ErrEll	ErrEll	ErrEll	ErrEll	ErrEll	ErrEll	ErrEll	ErrEll	ErrEll	ErrEll	ErrEll	ErrEll	ErrEll	ErrEll	ErrEll	ErrEll	ErrEll	ErrEll	ErrEll	ErrEll	ErrEll	ErrEll	ErrEll	ErrEll	ErrEll	ErrEll	ErrEll	ErrEll	ErrEll
		0.63402	0.0804063
		0.645584	0.0806174
		0.647543	0.0817098
		0.64649	0.0817263
		0.646658	0.0817919
		0.661657	0.0819092
		0.653236	0.0819218
		0.656229	0.0820284
		0.651219	0.0821861
		0.652552	0.0824019
		0.668779	0.0826545
		0.659897	0.0830805
		0.668328	0.0831099
		0.663455	0.083142
		0.675225	0.0832628
		0.679818	0.0837389
		0.677983	0.0842402
		0.672795	0.0842439
		0.673232	0.084301
		0.67391	0.0858375
		0.695152	0.0860132
		0.692123	0.0861469
		0.70755	0.0863071
		0.693081	0.0864143
		0.711399	0.0874097
		0.720794	0.0890088
		0.725835	0.0902176
		0.753207	0.0928383
		0.779829	0.0932266
		0.774811	0.094547
		0.811511	0.0981943
		0.815389	0.0984175
		0.822066	0.0991525
		0.842689	0.0994331
		0.838913	0.0996185
		0.841836	0.100754
		0.851155	0.100795
		0.857444	0.10122
		0.849761	0.101816
		0.869997	0.102453
		0.873678	0.102961
		0.867425	0.103429
		0.874088	0.104046
		0.891484	0.105156
		0.933409	0.109408
		0.956699	0.110406
		0.98423	0.112942
		1.00864	0.115596
		1.14092	0.127655
		1.16029	0.129011
		1.29701	0.141323
		1.51175	0.157026
		1.65012	0.161607
		1.6154	0.16335
		IsoLine	IsoLine
[truncated: 134 more columns]

## Sheet: PlotDat7
Source sheet	all data	0.543268	0.0704828	0.447642	0.06	0.482812	0.0640155	0.561702	0.0715944	0.581288	0.0739099	0.595389	0.0755062	0.607438	0.0762574	0.608658	0.0764523	0.60981	0.0765331	0.608066	0.0776071	0.627983	0.0773869	0.628889	0.0778906	0.628279	0.0785631	0.63268	0.0790882	0.634206	0.0786814	0.630115	0.0784608	0.635749	0.0790171	0.627594	0.0786956	0.627819	0.0791357	0.6311	0.0789481	0.62805	0.0798182	0.637261	0.0796657	0.643556	0.0789794	0.639141	0.079569
Plot name	Concordia8	0.564194	0.0726172	0.447978	0.0600389	0.512308	0.0673218	0.561334	0.0718048	0.580944	0.0740954	0.595005	0.075723	0.607067	0.0764621	0.608266	0.076669	0.609356	0.0767894	0.60763	0.0777918	0.627556	0.0776245	0.628463	0.078128	0.627869	0.0787739	0.632282	0.0792448	0.633858	0.0788531	0.629637	0.0787275	0.635337	0.0792261	0.627205	0.0789111	0.627431	0.0793464	0.63072	0.0791604	0.62768	0.0799565	0.636768	0.0799343	0.643016	0.0792604	0.638648	0.0798456
Plot Type	1	0.576222	0.0742941	0.465291	0.0620254	0.542391	0.0706383	0.560271	0.0719645	0.579956	0.074224	0.5939	0.0758848	0.606001	0.0766116	0.607137	0.0768267	0.608037	0.0769936	0.606382	0.0778871	0.626318	0.0778105	0.627231	0.0783084	0.626692	0.0789146	0.631144	0.0793199	0.632858	0.0789635	0.62825	0.0789413	0.634157	0.0793646	0.626084	0.0790692	0.626316	0.0794955	0.629625	0.07932	0.626621	0.080016	0.635349	0.080126	0.641437	0.0794958	0.637223	0.0800549
1st free col	173	0.588954	0.0750241	0.482812	0.0640155	0.573073	0.0739651	0.558555	0.0720672	0.578362	0.0742909	0.592115	0.0759855	0.604279	0.0767001	0.605315	0.0769195	0.605905	0.0771378	0.604371	0.0778896	0.624316	0.0779379	0.625241	0.0784246	0.624794	0.0789797	0.629308	0.0793106	0.631246	0.0790082	0.626005	0.0790937	0.632254	0.0794273	0.624275	0.0791638	0.624516	0.0795773	0.627856	0.079421	0.624913	0.0799943	0.633059	0.0802336	0.63888	0.0796763	0.634922	0.080189
Sigma Level	2	0.589097	0.0751361	0.500542	0.0660095	0.604365	0.0773023	0.556252	0.072109	0.576224	0.0742935	0.58972	0.0760212	0.601969	0.0767242	0.60287	0.0769438	0.603041	0.0772165	0.601674	0.0777989	0.621628	0.0780016	0.62257	0.0784724	0.622248	0.0789667	0.626845	0.0792173	0.629084	0.0789856	0.62299	0.0791791	0.629701	0.0794118	0.621847	0.0791914	0.622102	0.0795885	0.625482	0.0794594	0.622622	0.0798924	0.629986	0.0802529	0.635442	0.0797951	0.631833	0.0802428
Absolute Errs	FALSE	0.586862	0.0754333	0.518484	0.0680071	0.636279	0.0806498	0.55345	0.0720883	0.573623	0.0742316	0.586806	0.0759906	0.599158	0.0766829	0.599895	0.0768986	0.599555	0.0772266	0.598395	0.0776188	0.618356	0.0779993	0.61932	0.0784498	0.619151	0.0788761	0.623851	0.0790435	0.626454	0.0788964	0.61932	0.079194	0.626595	0.0793187	0.618894	0.0791507	0.619165	0.0795287	0.622593	0.0794336	0.619836	0.0797142	0.626249	0.0801831	0.631257	0.0798477	0.628074	0.080214
Symbol Type	1	0.58652	0.0754688	0.53664	0.0700085	0.668829	0.0840077	0.550256	0.0720059	0.57066	0.0741077	0.583485	0.0758947	0.595955	0.0765779	0.596506	0.0767856	0.595581	0.0771679	0.594659	0.077356	0.614627	0.077931	0.615615	0.0783576	0.615623	0.0787114	0.620439	0.078796	0.623458	0.0787442	0.615136	0.079138	0.623057	0.0791516	0.615528	0.0790434	0.615819	0.0794004	0.619301	0.0793448	0.616662	0.0794664	0.62199	0.0800269	0.626484	0.079832	0.62379	0.0801039
Inverse Plot	FALSE	0.606449	0.0762828	0.555014	0.0720136	0.702025	0.087376	0.546794	0.071865	0.567449	0.0739265	0.579885	0.0757374	0.592483	0.0764132	0.592831	0.0766093	0.591272	0.0770425	0.590611	0.0770207	0.610583	0.0777994	0.611599	0.0781996	0.611799	0.078479	0.616742	0.0784842	0.620211	0.0785348	0.610599	0.0790131	0.619223	0.0789168	0.61188	0.0788737	0.612192	0.0792083	0.615731	0.0791964	0.613222	0.0791586	0.617374	0.0797904	0.621307	0.0797486	0.619146	0.0799167
Color Plot	TRUE	0.607504	0.0766413	0.573607	0.0740225	0.735883	0.0907549	0.543196	0.071671	0.564112	0.073695	0.576144	0.0755245	0.588875	0.0761951	0.589014	0.0763764	0.586794	0.0768552	0.586405	0.0766258	0.606381	0.0776095	0.607426	0.0779816	0.607826	0.0781877	0.612901	0.0781201	0.616837	0.0782762	0.605884	0.0788242	0.615239	0.0786235	0.608089	0.078648	0.608424	0.0789598	0.612023	0.0789939	0.609648	0.0788027	0.612578	0.0794826	0.615925	0.0796008	0.61432	0.0796596
3D plot	FALSE	0.607924	0.0769479	0.592423	0.0760352	0.770413	0.0941442	0.539601	0.0714313	0.560779	0.0734221	0.572406	0.0752644	0.585271	0.075932	0.585199	0.0760958	0.582319	0.0766133	0.582204	0.0761863	0.602181	0.0773687	0.603256	0.0777121	0.603857	0.0778488	0.609063	0.0777177	0.613467	0.0779783	0.601171	0.0785786	0.611258	0.0782828	0.604301	0.078375	0.604659	0.0786646	0.608316	0.0787453	0.606078	0.0784124	0.607786	0.0791153	0.610546	0.0793941	0.609498	0.0793424
Linear	FALSE	0.613	0.0771238	0.611464	0.0780517	0.805631	0.097544	0.536147	0.0711551	0.557577	0.0731183	0.568815	0.074967	0.581808	0.0756339	0.581534	0.0757783	0.578018	0.0763261	0.578168	0.0757194	0.598145	0.077086	0.599248	0.0774015	0.600044	0.0774752	0.605377	0.0772925	0.610229	0.0776527	0.596642	0.0782856	0.607435	0.0779079	0.600662	0.0780653	0.601042	0.078334	0.604756	0.07846	0.602649	0.0780025	0.603182	0.0787027	0.605375	0.0791366	0.604864	0.0789774
Data Range	AC3:AG84	0.616922	0.0772553	0.630732	0.0800719	0.841549	0.100954	0.532966	0.0708531	0.554629	0.0727951	0.565509	0.0746438	0.578619	0.0753125	0.57816	0.0754361	0.574057	0.0760045	0.574454	0.0752427	0.594429	0.0767726	0.595559	0.0770617	0.596534	0.0770814	0.601984	0.0768609	0.607249	0.0773118	0.592471	0.0779566	0.603915	0.0775132	0.597311	0.0777306	0.597712	0.0779806	0.601477	0.0781491	0.599493	0.0775889	0.598944	0.0782606	0.600611	0.0788381	0.600598	0.0785785
Filled Symbols	TRUE	0.605952	0.0773472	0.650231	0.0820959	0.878181	0.104375	0.530182	0.0705369	0.552049	0.0724652	0.562614	0.0743071	0.575828	0.07498	0.575206	0.0750824	0.570588	0.075661	0.571203	0.0747748	0.591174	0.0764403	0.592328	0.0767057	0.593461	0.0766824	0.599014	0.0764393	0.60464	0.0769687	0.588818	0.0776042	0.600834	0.0771138	0.594378	0.0773839	0.594797	0.0776181	0.598606	0.0778244	0.59673	0.0771875	0.595234	0.077806	0.596438	0.0785101	0.596862	0.0781612
ConcAge	FALSE	0.615337	0.0773922	0.669963	0.0841237	0.915543	0.107807	0.5279	0.0702186	0.549935	0.0721411	0.560242	0.0739699	0.573541	0.0746492	0.572786	0.0747308	0.567744	0.0753088	0.568541	0.0743335	0.588506	0.0761019	0.58968	0.0763472	0.590945	0.0762937	0.596582	0.076044	0.602503	0.0766367	0.585823	0.0772418	0.59831	0.0767251	0.591974	0.0770385	0.592409	0.0772604	0.596254	0.0774985	0.594467	0.0768136	0.592194	0.0773564	0.593015	0.0781652	0.593801	0.0777413
ConcSwap	FALSE	0.60817	0.0774176	0.68993	0.0861553	0.953647	0.111249	0.526209	0.0699105	0.54837	0.0718353	0.558484	0.0736452	0.571847	0.0743327	0.570993	0.0743947	0.565636	0.0749613	0.56657	0.0739359	0.586528	0.0757705	0.587718	0.0760001	0.589081	0.0759301	0.59478	0.0756903	0.60092	0.0763284	0.583602	0.0768836	0.596441	0.0763621	0.590193	0.0767077	0.59064	0.0769212	0.59451	0.0771839	0.592792	0.0764818	0.589942	0.0769291	0.590475	0.0778168	0.591532	0.0773352
1st Symbol-row	1	0.608511	0.0777425	0.710137	0.0881907	0.99251	0.114702	0.525173	0.0696243	0.547412	0.0715595	0.557408	0.0733454	0.570809	0.0740429	0.569895	0.0740872	0.564343	0.0746319	0.565365	0.0735972	0.585316	0.0754588	0.586515	0.0756776	0.587941	0.0756056	0.593679	0.0753916	0.599953	0.0760557	0.58224	0.0765431	0.595297	0.0760386	0.589103	0.0764041	0.589557	0.0766135	0.593442	0.0768926	0.591767	0.0762046	0.588564	0.0765404	0.588915	0.077478	0.590142	0.0769583
		0.612096	0.077792	0.730585	0.0902299	1.03215	0.118166	0.524833	0.0693711	0.5471	0.0713244	0.557055	0.0730821	0.570469	0.0737907	0.569536	0.0738199	0.563915	0.0743334	0.564974	0.0733304	0.584915	0.0751787	0.58612	0.0753921	0.587569	0.0753327	0.59332	0.0751595	0.599637	0.0758292	0.581789	0.0762335	0.594924	0.0757672	0.588746	0.0761395	0.589204	0.0763492	0.593092	0.0766359	0.591434	0.0759928	0.588113	0.0762053	0.588395	0.0771621	0.589685	0.0766252
		0.609742	0.0779055	0.751278	0.0922729	1.07257	0.121641	0.525201	0.0691607	0.547444	0.0711389	0.557438	0.0728653	0.57084	0.073586	0.569928	0.0736033	0.564369	0.0740771	0.56541	0.0731457	0.585342	0.0749411	0.586546	0.0751546	0.587979	0.0751218	0.593718	0.0750029	0.599986	0.0756574	0.582267	0.0759668	0.595336	0.0755582	0.589135	0.075924	0.589592	0.0761385	0.593471	0.0764237	0.591804	0.0758545	0.588607	0.0759368	0.588935	0.0768811	0.590179	0.0763487
		0.612687	0.0779355	0.772218	0.0943198	IsoLine	IsoLine	0.526264	0.069001	0.548432	0.0710103	0.558544	0.0727035	0.571906	0.0734365	0.571057	0.0734455	0.565688	0.073873	0.566658	0.0730504	0.58658	0.0747551	0.587778	0.0749743	0.589156	0.0749812	0.594856	0.0749278	0.600985	0.075547	0.583654	0.0757531	0.596516	0.0754197	0.590255	0.0757659	0.590707	0.0759894	0.594566	0.076264	0.592863	0.0757951	0.590025	0.075745	0.590514	0.0766457	0.591603	0.0761393
		0.615976	0.0780708	0.793408	0.0963705			0.52798	0.0688983	0.550026	0.0709434	0.560328	0.0726028	0.573628	0.073348	0.572879	0.0733527	0.56782	0.0737288	0.568669	0.073048	0.588582	0.0746277	0.589767	0.074858	0.591054	0.0749161	0.596692	0.074937	0.602597	0.0755023	0.585899	0.0756006	0.598419	0.075357	0.592064	0.0756713	0.592506	0.0759077	0.596335	0.076163	0.594572	0.0758167	0.592315	0.0756374	0.593071	0.0764652	0.593905	0.0760052
		0.614413	0.0780971	0.814852	0.098425			0.530283	0.0688565	0.552164	0.0709409	0.562724	0.0725671	0.575939	0.0733239	0.575324	0.0733284	0.570684	0.0736501	0.571366	0.0731386	0.59127	0.074564	0.592439	0.0748102	0.5936	0.0749291	0.599155	0.0750304	0.604759	0.075525	0.588914	0.0755153	0.600972	0.0753725	0.594492	0.0756438	0.594921	0.0758965	0.598709	0.0761247	0.596863	0.0759186	0.595388	0.0756182	0.596509	0.0763464	0.596994	0.0759515
		0.617471	0.0782169	0.836552	0.100483			0.533086	0.0688772	0.554765	0.0710027	0.565638	0.0725977	0.578749	0.0733652	0.578299	0.0733736	0.57417	0.0736399	0.574645	0.0733187	0.594542	0.0745663	0.595689	0.0748329	0.596697	0.0750196	0.602149	0.0752041	0.607389	0.0756141	0.592584	0.0755003	0.604078	0.0754656	0.597446	0.0756844	0.597858	0.0759562	0.601598	0.0761504	0.599649	0.0760969	0.599125	0.0756879	0.600695	0.0762938	0.600753	0.0759802
		0.617646	0.0783104	0.858512	0.102546			0.536279	0.0689596	0.557727	0.0711266	0.568959	0.0726936	0.581952	0.0734702	0.581688	0.0734866	0.578144	0.0736986	0.578381	0.0735815	0.598271	0.0746346	0.599393	0.074925	0.600225	0.0751843	0.605561	0.0754517	0.610385	0.0757663	0.596768	0.0755564	0.607616	0.0756328	0.600811	0.0757917	0.601204	0.0760846	0.604891	0.0762392	0.602822	0.0763446	0.603384	0.0758441	0.605468	0.0763095	0.605036	0.0760903
		0.613936	0.0783423	0.880735	0.104612			0.539741	0.0691005	0.560939	0.0713078	0.572559	0.0728509	0.585424	0.0736349	0.585363	0.0736629	0.582452	0.0738241	0.582429	0.0739168	0.602315	0.0747662	0.603409	0.0750831	0.604049	0.0754168	0.609258	0.0757635	0.613632	0.0759757	0.601305	0.0756812	0.61145	0.0758675	0.60446	0.0759614	0.604831	0.0762767	0.60846	0.0763877	0.606262	0.0766524	0.608	0.0760806	0.610644	0.0763929	0.60968	0.0762775
		0.620353	0.0784793	0.903223	0.106682			0.543339	0.0692945	0.564275	0.0715393	0.5763	0.0730637	0.589032	0.073853	0.58918	0.0738959	0.586931	0.0740113	0.586635	0.0743118	0.606517	0.0749561	0.607583	0.075301	0.608022	0.0757081	0.613099	0.0761275	0.617006	0.0762343	0.60602	0.0758701	0.615435	0.0761609	0.608251	0.0761871	0.608599	0.0765251	0.612169	0.0765901	0.609836	0.0770083	0.612796	0.0763885	0.616026	0.0765407	0.614506	0.0765346
		0.627577	0.0785434	0.925979	0.108756			0.546934	0.0695342	0.567609	0.0718122	0.580037	0.0733239	0.592636	0.0741162	0.592995	0.0741765	0.591406	0.0742532	0.590836	0.0747512	0.610717	0.075197	0.611753	0.0755705	0.611992	0.076047	0.616937	0.0765299	0.620376	0.0765322	0.610733	0.0761157	0.619415	0.0765016	0.612039	0.0764601	0.612364	0.0768203	0.615875	0.0768388	0.613406	0.0773987	0.617588	0.0767557	0.621406	0.0767474	0.619329	0.0768518
		0.616062	0.0786652	0.949008	0.110833			0.550388	0.0698104	0.570811	0.0721161	0.583629	0.0736212	0.596099	0.0744142	0.59666	0.0744939	0.595707	0.0745404	0.594871	0.0752182	0.614752	0.0754796	0.61576	0.0758811	0.615805	0.0764205	0.620623	0.0769551	0.623614	0.0768578	0.615262	0.0764087	0.623238	0.0768765	0.615678	0.0767699	0.615981	0.077151	0.619436	0.077124	0.616835	0.0778086	0.622192	0.0771683	0.626577	0.0770049	0.623962	0.0772168
		0.626026	0.0788663	0.972313	0.112915			0.553569	0.0701124	0.573759	0.0724392	0.586935	0.0739445	0.599288	0.0747356	0.600034	0.0748361	0.599668	0.074862	0.598586	0.0756948	0.618469	0.075793	0.61945	0.0762209	0.619315	0.0768144	0.624016	0.0773868	0.626594	0.0771987	0.619433	0.0767377	0.626758	0.0772712	0.619029	0.0771045	0.619311	0.0775043	0.622715	0.077435	0.619991	0.0782221	0.62643	0.0776104	0.631341	0.0773034	0.628229	0.0776157
		0.622418	0.0789869	0.995896	0.115001			0.556353	0.0704286	0.576339	0.0727691	0.58983	0.0742812	0.602079	0.0750681	0.602988	0.0751898	0.603137	0.0752055	0.601836	0.0761627	0.621724	0.0761253	0.622681	0.0765769	0.622387	0.0772133	0.626986	0.0778083	0.629203	0.0775418	0.623086	0.0770902	0.629839	0.0776706	0.621962	0.0774512	0.622226	0.0778668	0.625585	0.0777596	0.622754	0.0786236	0.63014	0.078065	0.635514	0.0776314	0.631964	0.078033
		0.630702	0.0791442	1.01976	0.11709			0.558635	0.0707469	0.578453	0.0730932	0.592202	0.0746184	0.604366	0.075399	0.605408	0.0755414	0.60598	0.0755578	0.604499	0.076604	0.624391	0.0764637	0.625328	0.0769354	0.624903	0.0776021	0.629418	0.0782036	0.63134	0.0778738	0.62608	0.0774525	0.632363	0.0780592	0.624365	0.0777966	0.624614	0.0782246	0.627938	0.0780855	0.625017	0.0789974	0.63318	0.0785146	0.638936	0.0779763	0.635025	0.0784529
		0.627837	0.0794074	1.04391	0.119183			0.560326	0.0710551	0.580018	0.073399	0.593959	0.0749431	0.606061	0.0757154	0.607201	0.0758775	0.608089	0.0759053	0.60647	0.0770016	0.62637	0.0767951	0.627291	0.0772826	0.626767	0.0779657	0.63122	0.0785574	0.632923	0.0781821	0.628302	0.0778108	0.634232	0.0784223	0.626146	0.0781275	0.626383	0.0785638	0.629681	0.0784002	0.626692	0.0793293	0.635432	0.078942	0.641476	0.0783247	0.637295	0.078859
		0.627445	0.0794482	1.06835	0.121281			0.561362	0.0713412	0.580976	0.0736748	0.595036	0.0752429	0.607098	0.0760052	0.608299	0.076185	0.609382	0.0762346	0.607674	0.0773403	0.627582	0.0771068	0.628493	0.0776051	0.627907	0.0782902	0.632321	0.078856	0.633891	0.0784548	0.629664	0.0781512	0.635376	0.0787457	0.627236	0.078431	0.627465	0.0788715	0.630749	0.0786914	0.627717	0.0796064	0.63681	0.0793306	0.643036	0.0786635	0.638684	0.0792359
		0.628419	0.0796324	1.09308	0.123382			0.561702	0.0715944	0.581288	0.0739099	0.595389	0.0755062	0.607438	0.0762574	0.608658	0.0764523	0.60981	0.0765331	0.608066	0.0776071	0.627983	0.0773869	0.628889	0.0778906	0.628279	0.0785631	0.63268	0.0790882	0.634206	0.0786814	0.630115	0.0784608	0.635749	0.0790171	0.627594	0.0786956	0.627819	0.0791357	0.6311	0.0789481	0.62805	0.0798182	0.637261	0.0796657	0.643556	0.0789794	0.639141	0.079569
		0.634064	0.0799752	1.1	0.123964			ErrEll	ErrEll	ErrEll	ErrEll	ErrEll	ErrEll	ErrEll	ErrEll	ErrEll	ErrEll	ErrEll	ErrEll	ErrEll	ErrEll	ErrEll	ErrEll	ErrEll	ErrEll	ErrEll	ErrEll	ErrEll	ErrEll	ErrEll	ErrEll	ErrEll	ErrEll	ErrEll	ErrEll	ErrEll	ErrEll	ErrEll	ErrEll	ErrEll	ErrEll	ErrEll	ErrEll	ErrEll	ErrEll	ErrEll	ErrEll	ErrEll	ErrEll
		0.63402	0.0804063	IsoLine	IsoLine
		0.645584	0.0806174
		0.647543	0.0817098
		0.64649	0.0817263
		0.646658	0.0817919
		0.661657	0.0819092
		0.653236	0.0819218
		0.656229	0.0820284
		0.651219	0.0821861
		0.652552	0.0824019
		0.668779	0.0826545
		0.659897	0.0830805
		0.668328	0.0831099
		0.663455	0.083142
		0.675225	0.0832628
		0.679818	0.0837389
		0.677983	0.0842402
		0.672795	0.0842439
		0.673232	0.084301
		0.67391	0.0858375
		0.695152	0.0860132
		0.692123	0.0861469
		0.70755	0.0863071
		0.693081	0.0864143
		0.711399	0.0874097
		0.720794	0.0890088
		0.725835	0.0902176
		0.753207	0.0928383
		0.779829	0.0932266
		0.774811	0.094547
		0.811511	0.0981943
		0.815389	0.0984175
		0.822066	0.0991525
		0.842689	0.0994331
		0.838913	0.0996185
		0.841836	0.100754
		0.851155	0.100795
		0.857444	0.10122
		0.849761	0.101816
		0.869997	0.102453
		0.873678	0.102961
		0.867425	0.103429
		0.874088	0.104046
		0.891484	0.105156
		0.933409	0.109408
		0.956699	0.110406
		0.98423	0.112942
		1.00864	0.115596
		IsoLine	IsoLine
[truncated: 122 more columns]

## Sheet: PlotDat10
Source sheet	all data	0.80622	0.0549737	0	0	0.217708	0.0315113	0.835026	0.055721	0.820392	0.0737944	0.401435	0.047036	0.380692	0.0441478	0.708287	0.0737278	0.848762	0.0877743	0.496166	0.058292	2.21047	0.165994	0.692138	0.0779681	1.371	0.124834	0.737309	0.0825066	0.552288	0.0665225	0.698418	0.0783502	0.651707	0.0768944	0.670599	0.0777874	0.656737	0.0762875	0.708318	0.0821571	0.769588	0.0872481	0.851993	0.0937163	0.680694	0.0787985	0.689679	0.0794927
Plot name	Concordia8	0.794322	0.072243	0.0862007	0.0131092	0.482812	0.0640155	0.833852	0.0559591	0.819317	0.0740484	0.399691	0.0473236	0.379191	0.0446901	0.70635	0.0741707	0.847377	0.0882065	0.495048	0.0586532	2.20583	0.167048	0.691225	0.0782704	1.36684	0.126007	0.736298	0.0828347	0.551332	0.0668257	0.6969	0.0788335	0.650836	0.0771816	0.669522	0.0781593	0.655505	0.076707	0.707413	0.0824595	0.768453	0.0876338	0.850423	0.094238	0.679433	0.0792167	0.688181	0.0799834
Plot Type	1	0.359555	0.0426942	0.179832	0.0263902	0.805631	0.097544	0.830439	0.0561174	0.816217	0.0741561	0.394695	0.0472363	0.374869	0.0450448	0.700708	0.0745304	0.843383	0.088476	0.491808	0.0589252	2.19239	0.167668	0.6886	0.0784445	1.35481	0.126784	0.733396	0.0830167	0.548601	0.0669589	0.6925	0.0791903	0.648343	0.0773278	0.666412	0.0784154	0.651943	0.0770056	0.704817	0.0826254	0.765186	0.0878728	0.845889	0.0945868	0.675782	0.0795214	0.683838	0.0803452
1st free col	57	0.344376	0.0423758	0.281534	0.0398453	1.19873	0.132129	0.825065	0.0561831	0.811343	0.0741089	0.386852	0.0467809	0.368077	0.0451834	0.691819	0.0747776	0.837103	0.088561	0.486708	0.0590859	2.17124	0.167803	0.684476	0.0784763	1.33587	0.127101	0.728838	0.0830378	0.544315	0.0669114	0.685575	0.0793917	0.644429	0.0773213	0.66152	0.0785347	0.646338	0.0771592	0.70074	0.0826412	0.760052	0.0879457	0.838759	0.0947344	0.670036	0.0796882	0.677004	0.0805488
Sigma Level	2	0.660618	0.0731421	0.392003	0.0534768	1.67741	0.167804	0.818164	0.0561508	0.805091	0.0739104	0.376797	0.0459945	0.359365	0.0450944	0.680402	0.0748922	0.829045	0.0884546	0.48016	0.0591224	2.14409	0.167443	0.679187	0.0783632	1.31156	0.126934	0.722992	0.0828964	0.538823	0.066687	0.676684	0.0794213	0.639411	0.0771626	0.655244	0.0785077	0.639145	0.0771552	0.695512	0.0825058	0.753466	0.0878466	0.82961	0.0946688	0.662661	0.0797034	0.668232	0.0805778
Absolute Errs	FALSE	0.815162	0.0861982	0.511995	0.067287	2.2603	0.204603	0.810295	0.0560231	0.797965	0.0735769	0.365346	0.0449407	0.349439	0.0447853	0.667382	0.0748651	0.819862	0.0881653	0.472695	0.0590316	2.11313	0.166617	0.673162	0.0781145	1.28385	0.126296	0.716332	0.0826038	0.532569	0.0663039	0.66655	0.0792767	0.633697	0.0768644	0.648091	0.0783365	0.630946	0.0769941	0.689558	0.08223	0.745963	0.0875835	0.819183	0.0943955	0.654254	0.0795659	0.658233	0.0804296
Symbol Type	1	0.468844	0.0575519	0.64233	0.0812782	2.97009	0.242562	0.802097	0.0558104	0.790545	0.0731353	0.353425	0.0437048	0.339103	0.0442809	0.653813	0.0746985	0.810299	0.0877167	0.464919	0.0588209	2.08089	0.165391	0.666888	0.0777502	1.25499	0.125238	0.709399	0.0821839	0.526059	0.0657931	0.655992	0.0789696	0.627748	0.076451	0.64064	0.078035	0.622406	0.0766889	0.683359	0.0818363	0.73815	0.0871777	0.808324	0.0939364	0.645497	0.0792867	0.647816	0.0801164
Inverse Plot	FALSE	2.09717	0.161688	0.7839	0.0954529	3.83441	0.281716	0.794232	0.0555299	0.783431	0.0726214	0.342002	0.0423872	0.329193	0.0436222	0.640797	0.0744057	0.801129	0.0871451	0.457461	0.0585075	2.04996	0.163865	0.660875	0.0772999	1.22731	0.123846	0.702752	0.0816705	0.519821	0.0651959	0.645866	0.078525	0.622047	0.0759559	0.633497	0.0776277	0.614217	0.0762642	0.677417	0.0813565	0.73066	0.0866621	0.797912	0.0933288	0.637099	0.0788885	0.637825	0.0796636
Color Plot	TRUE	0.670097	0.0766882	0.937674	0.109813	4.8869	0.322105	0.787338	0.0552044	0.777199	0.0720768	0.332	0.0410943	0.320514	0.0428626	0.629386	0.0740106	0.793097	0.0864967	0.450925	0.0581166	2.02286	0.162163	0.655608	0.0768	1.20305	0.122233	0.696932	0.0811054	0.514361	0.0645609	0.636993	0.0779789	0.617056	0.0754192	0.627238	0.0771474	0.607042	0.0757546	0.672215	0.0808294	0.7241	0.0860785	0.78879	0.092622	0.62974	0.0784035	0.629071	0.0791077
3D plot	FALSE	1.26959	0.121117	1.1047	0.124362	6.16853	0.363766	0.781975	0.0548601	0.772354	0.0715458	0.32423	0.0399311	0.313768	0.0420635	0.620505	0.0735451	0.786852	0.0858242	0.44584	0.0576799	2.00177	0.160423	0.651516	0.076291	1.18419	0.12053	0.692409	0.0805342	0.510121	0.0639394	0.63009	0.0773754	0.613179	0.0748843	0.622372	0.0766332	0.601462	0.0752012	0.668172	0.0802979	0.719001	0.0854741	0.781697	0.0918732	0.624016	0.0778711	0.622262	0.0784939
Linear	FALSE	0.712948	0.0810312	1.28613	0.139102	7.72917	0.40674	0.778575	0.0545251	0.769289	0.0710711	0.319322	0.0389918	0.309502	0.0412897	0.614874	0.073047	0.782901	0.085182	0.442619	0.0572329	1.98842	0.158784	0.648928	0.0758143	1.17224	0.118874	0.689551	0.0800034	0.507444	0.0633817	0.625719	0.0767635	0.61073	0.0743946	0.619293	0.0761267	0.59793	0.074649	0.665618	0.0798049	0.715777	0.084898	0.777209	0.091143	0.620392	0.0773344	0.617949	0.0778719
Data Range	C3:G152	0.529417	0.0647278	1.4832	0.154034	9.62957	0.451068	0.777415	0.0542264	0.768252	0.0706915	0.317674	0.0383523	0.308061	0.0406039	0.612949	0.0725565	0.781563	0.0846221	0.441523	0.0568118	1.98388	0.157382	0.648056	0.0754083	1.16818	0.1174	0.688587	0.0795557	0.506547	0.0629331	0.624231	0.0761927	0.609907	0.0739897	0.618249	0.0756689	0.596731	0.0741426	0.664759	0.0793904	0.714688	0.0843967	0.775688	0.0904906	0.61916	0.0768368	0.616483	0.0772921
Filled Symbols	FALSE	0.661325	0.0772714	1.69725	0.169163	IsoLine	IsoLine	0.778589	0.0539883	0.769326	0.0704375	0.319418	0.0380647	0.309562	0.0400616	0.614885	0.0721136	0.782947	0.0841898	0.442641	0.0564506	1.98852	0.156327	0.648969	0.075106	1.17234	0.116228	0.689598	0.0792277	0.507503	0.0626299	0.625749	0.0757093	0.610778	0.0737026	0.619327	0.0752969	0.597963	0.0737232	0.665664	0.0790879	0.715823	0.084011	0.777259	0.0899689	0.620421	0.0764187	0.617981	0.0768013
ConcAge	FALSE	0.630807	0.0754421	1.92975	0.184489			0.782001	0.05383	0.772426	0.0703298	0.324414	0.0381521	0.313883	0.0397069	0.620527	0.0717539	0.786941	0.0839203	0.445881	0.0561786	2.00195	0.155708	0.651595	0.0749319	1.18437	0.115451	0.6925	0.0790457	0.510234	0.0624966	0.630149	0.0753525	0.613271	0.0735563	0.622437	0.0750409	0.601526	0.0734245	0.66826	0.0789221	0.71909	0.0837719	0.781793	0.0896201	0.624072	0.0761139	0.622323	0.0764395
ConcSwap	FALSE	0.644424	0.0767281	2.1823	0.200017			0.787376	0.0537643	0.7773	0.070377	0.332257	0.0386074	0.320675	0.0395683	0.629416	0.0715067	0.793222	0.0838353	0.450981	0.0560178	2.02311	0.155572	0.655719	0.0749001	1.20331	0.115133	0.697058	0.0790246	0.51452	0.0625441	0.637075	0.0751512	0.617185	0.0735628	0.627329	0.0749215	0.607131	0.073271	0.672337	0.0789062	0.724224	0.083699	0.788923	0.0894725	0.629818	0.0759471	0.629157	0.0762359
1st Symbol-row	201	0.626734	0.0752151	2.45662	0.215748			0.794277	0.0537966	0.783553	0.0705755	0.342312	0.0393939	0.329387	0.0396573	0.640834	0.0713921	0.80128	0.0839418	0.457529	0.0559814	2.05026	0.155932	0.661007	0.0750132	1.22762	0.1153	0.702904	0.079166	0.520012	0.0627685	0.645965	0.0751216	0.622203	0.0737216	0.633605	0.0749485	0.614324	0.0732749	0.677564	0.0790416	0.730809	0.0837982	0.798072	0.089538	0.637193	0.0759319	0.637929	0.076207
		0.686538	0.0807737	2.75458	0.231686			0.802145	0.0539243	0.790678	0.070909	0.353763	0.0404477	0.339313	0.0399664	0.653854	0.0714191	0.810462	0.084231	0.464994	0.0560722	2.08121	0.156759	0.667033	0.0752619	1.25533	0.115939	0.709564	0.0794586	0.526266	0.0631517	0.6561	0.0752662	0.627917	0.0740198	0.640758	0.0751197	0.622522	0.0734361	0.683519	0.0793174	0.738312	0.0840613	0.808498	0.0898114	0.6456	0.0760694	0.647929	0.0763551
		0.742138	0.0858224	3.07823	0.247832			0.810344	0.054137	0.798098	0.0713506	0.365684	0.0416835	0.34965	0.0404708	0.667422	0.0715858	0.820026	0.0846797	0.47277	0.0562828	2.11346	0.157985	0.673306	0.0756262	1.28419	0.116997	0.716497	0.0798785	0.532776	0.0636625	0.666658	0.0755732	0.633866	0.0744331	0.648209	0.0754212	0.631062	0.0737413	0.689718	0.0797111	0.746125	0.0844671	0.819358	0.0902705	0.654357	0.0763486	0.658346	0.0766683
		0.813841	0.0921034	3.42977	0.26419			0.818209	0.0544175	0.805212	0.0718645	0.377108	0.0430012	0.359559	0.0411295	0.680439	0.0718786	0.829195	0.0852513	0.480228	0.0565963	2.14439	0.15951	0.67932	0.0760765	1.31187	0.118388	0.723144	0.0803919	0.539013	0.0642596	0.676783	0.0760178	0.639567	0.0749282	0.655352	0.0758286	0.639251	0.074166	0.695659	0.080191	0.753615	0.0849827	0.82977	0.090878	0.662755	0.0767468	0.668336	0.0771211
		0.649927	0.0778177	3.81162	0.280763			0.825102	0.054743	0.811444	0.0724091	0.38711	0.044294	0.368238	0.0418891	0.69185	0.0722737	0.837228	0.0858996	0.486764	0.0569872	2.17149	0.161212	0.684586	0.0765764	1.33613	0.120001	0.728964	0.080957	0.544473	0.0648947	0.685657	0.076564	0.644558	0.075465	0.66161	0.0763088	0.646426	0.0746756	0.700862	0.080718	0.760175	0.0855663	0.838892	0.0915849	0.670114	0.0772318	0.677091	0.077677
		0.653081	0.0783924	4.22639	0.297552			0.830466	0.0550873	0.816289	0.0729402	0.394879	0.0454572	0.374984	0.0426882	0.70073	0.0727392	0.843472	0.0865722	0.491849	0.0574238	2.19257	0.162953	0.688679	0.0770854	1.35499	0.121704	0.733487	0.0815282	0.548714	0.0655162	0.692559	0.0771675	0.648435	0.0759999	0.666476	0.076823	0.652006	0.0752289	0.704904	0.0812495	0.765274	0.0861706	0.845984	0.0923337	0.675838	0.0777642	0.6839	0.0782908
		0.60148	0.0735456	4.67691	0.314562			0.833866	0.0554223	0.819354	0.0734148	0.399787	0.0463966	0.379251	0.043462	0.706362	0.0732373	0.847424	0.0872144	0.49507	0.0578708	2.20592	0.164591	0.691266	0.0775621	1.36694	0.12336	0.736345	0.082059	0.551391	0.0660738	0.696931	0.0777794	0.650884	0.0764896	0.669556	0.0773296	0.655539	0.0757812	0.707458	0.0817425	0.768499	0.0867468	0.850473	0.0930639	0.679462	0.0783009	0.688213	0.0789128
		0.607583	0.074565	5.16626	0.331795			0.835026	0.055721	0.820392	0.0737944	0.401435	0.047036	0.380692	0.0441478	0.708287	0.0737278	0.848762	0.0877743	0.496166	0.058292	2.21047	0.165994	0.692138	0.0779681	1.371	0.124834	0.737309	0.0825066	0.552288	0.0665225	0.698418	0.0783502	0.651707	0.0768944	0.670599	0.0777874	0.656737	0.0762875	0.708318	0.0821571	0.769588	0.0872481	0.851993	0.0937163	0.680694	0.0787985	0.689679	0.0794927
		0.806764	0.0930467	5.69779	0.349254			Gray	Gray	Gray	Gray	Gray	Gray	Gray	Gray	Gray	Gray	Gray	Gray	Gray	Gray	Gray	Gray	Gray	Gray	Gray	Gray	Gray	Gray	Gray	Gray	Gray	Gray	Gray	Gray	Gray	Gray	Gray	Gray	Gray	Gray	Gray	Gray	Gray	Gray	Gray	Gray	Gray	Gray
		0.610307	0.0749534	6.27515	0.366941
		0.519088	0.0658346	6.90227	0.384861
		0.610018	0.0750514	7.58345	0.403015
		0.589841	0.0731875	8.32335	0.421407
		0.715725	0.0853219	9.12703	0.440041
		0.66859	0.080999	9.99999	0.458919
		0.744127	0.0881755	10	0.458919
		0.408942	0.0541418	IsoLine	IsoLine
		0.626364	0.0770006
		0.599028	0.0743202
		0.605434	0.0750447
		0.84757	0.0977101
		0.633943	0.0779575
		0.609996	0.0756773
		1.51633	0.148753
		0.613654	0.0761817
		0.59748	0.0745775
		0.690767	0.0838254
		0.813074	0.0951968
		0.603263	0.0752549
		0.591835	0.0741216
		0.600698	0.075125
		0.607701	0.0758439
		0.618136	0.0769392
		0.684009	0.083455
		0.602707	0.0754095
		1.26546	0.132709
		0.623253	0.0775346
		0.580347	0.0732001
		0.878461	0.101649
		0.616922	0.0772553
		0.70755	0.0863071
		0.779829	0.0932266
		0.606449	0.0762828
		0.661657	0.0819092
		0.675225	0.0832628
		0.679818	0.0837389
		0.668779	0.0826545
		0.627577	0.0785434
		1.65012	0.161607
		0.613	0.0771238
		0.615337	0.0773922
		0.842689	0.0994331
		0.607504	0.0766413
		0.645584	0.0806174
		0.630702	0.0791442
		0.857444	0.10122
		0.668328	0.0831099
		0.607924	0.0769479
		0.711399	0.0874097
		0.869997	0.102453
		0.626026	0.0788663
		0.838913	0.0996185
		0.588954	0.0750241
		0.851155	0.100795
		0.656229	0.0820284
		0.677983	0.0842402
		0.873678	0.102961
		0.956699	0.110406
		0.589097	0.0751361
		0.695152	0.0860132
		0.98423	0.112942
		0.620353	0.0784793
		0.617471	0.0782169
		0.615976	0.0780708
		0.564194	0.0726172
		1.75177	0.170994
		0.653236	0.0819218
		0.634064	0.0799752
		0.617646	0.0783104
		0.627837	0.0794074
		0.612096	0.077792
		0.543268	0.0704828
		0.60817	0.0774176
		0.663455	0.083142
		0.627445	0.0794482
		0.614413	0.0780971
		0.891484	0.105156
		1.00864	0.115596
		0.612687	0.0779355
		0.622418	0.0789869
		0.720794	0.0890088
		0.692123	0.0861469
		0.628419	0.0796324
		0.672795	0.0842439
		0.841836	0.100754
		0.673232	0.084301
		0.605952	0.0773472
		0.647543	0.0817098
		0.693081	0.0864143
		1.6154	0.16335
		0.815389	0.0984175
		0.774811	0.094547
		0.933409	0.109408
		0.651219	0.0821861
		0.576222	0.0742941
		0.659897	0.0830805
		0.586862	0.0754333
		0.63402	0.0804063
		0.608511	0.0777425
		1.16029	0.129011
		0.64649	0.0817263
		0.822066	0.0991525
		0.874088	0.104046
		0.613936	0.0783423
		0.867425	0.103429
		0.609742	0.0779055
		1.85549	0.179883
		1.96952	0.187219
		0.849761	0.101816
		0.811511	0.0981943
		0.646658	0.0817919
		0.652552	0.0824019
		0.58652	0.0754688
		7.40758	0.39959
		1.14092	0.127655
		0.616062	0.0786652
		1.51175	0.157026
		0.753207	0.0928383
		0.725835	0.0902176
		1.29701	0.141323
		1.75007	0.175483
		0.67391	0.0858375
		1.04532	0.122553
		0.868927	0.106668
		1.14324	0.133638
		IsoLine	IsoLine
				1.20525	0.130876	0.680081	0.0828096	0.885778	0.101296	0.91174	0.105863	0.633883	0.0799394	0.89421	0.105388	0.62805	0.0798182	1.90709	0.183701	2.04706	0.190088	0.880715	0.103218	0.844223	0.100134	0.672192	0.0831903	0.679559	0.0835425	0.608066	0.0776071	7.63234	0.410796	1.19301	0.130387	0.642544	0.080221	1.59603	0.159224	0.782952	0.0947769	0.755419	0.0914139	1.3325	0.143945	1.79233	0.179192	0.704147	0.0869399
				1.2034	0.13148	0.678703	0.0832862	0.883165	0.102178	0.910185	0.106407	0.633048	0.0802196	0.893093	0.105745	0.627282	0.0799935	1.90496	0.184143	2.04388	0.190982	0.879439	0.103667	0.842865	0.10061	0.671133	0.0835829	0.678446	0.0839484	0.607161	0.0778465	7.62319	0.411245	1.19085	0.131094	0.641444	0.080631	1.59259	0.160203	0.781714	0.0952119	0.754201	0.0918496	1.33102	0.144346	1.79058	0.179434	0.702905	0.0873846
				1.19806	0.131884	0.674716	0.0836364	0.875602	0.102816	0.905706	0.106761	0.630664	0.0803478	0.889897	0.105914	0.625093	0.0799997	1.89881	0.18424	2.03468	0.191572	0.875758	0.103965	0.838967	0.100892	0.668091	0.0838305	0.675235	0.084229	0.604584	0.0778932	7.59657	0.410749	1.18466	0.131521	0.638287	0.0808818	1.58259	0.160924	0.778166	0.0954546	0.750685	0.0921531	1.32679	0.144501	1.78555	0.179357	0.699313	0.0877039
				1.18966	0.132055	0.668442	0.0838318	0.863701	0.103156	0.898665	0.106894	0.626925	0.0803135	0.88488	0.105882	0.62166	0.0798361	1.88916	0.183984	2.0202	0.191809	0.86997	0.10409	0.832844	0.100954	0.663313	0.0839129	0.670187	0.0843616	0.600543	0.0777435	7.55465	0.40935	1.17491	0.131636	0.633329	0.080953	1.56686	0.16133	0.772596	0.0954854	0.745156	0.0922997	1.32015	0.1444	1.77765	0.178965	0.693663	0.087872
				1.17888	0.13198	0.66039	0.0838567	0.848428	0.103172	0.889633	0.106797	0.622133	0.0801196	0.878449	0.105651	0.617262	0.0795162	1.87678	0.183396	2.00161	0.191674	0.862546	0.10403	0.824994	0.100793	0.657185	0.0838235	0.66371	0.0843354	0.595366	0.0774095	7.5008	0.407159	1.16242	0.131427	0.626973	0.0808389	1.54667	0.161387	0.765456	0.0953017	0.738061	0.0922777	1.31163	0.144049	1.76751	0.178292	0.686413	0.0878753
				1.16659	0.131664	0.651211	0.083709	0.831018	0.102862	0.879342	0.106476	0.616678	0.0797816	0.871125	0.105241	0.612255	0.0790658	1.86268	0.182524	1.98042	0.191178	0.854086	0.103791	0.816051	0.100422	0.650205	0.0835694	0.656329	0.0841526	0.589472	0.0769183	7.43941	0.404356	1.14818	0.130914	0.619733	0.0805486	1.52364	0.161091	0.757323	0.0949184	0.729977	0.0920888	1.30193	0.143477	1.75596	0.177391	0.678151	0.0877135
				1.15379	0.131133	0.64165	0.0834006	0.812884	0.102252	0.868625	0.105959	0.611	0.079327	0.863501	0.104683	0.607044	0.0785214	1.84799	0.181437	1.95835	0.190362	0.845275	0.103392	0.80674	0.0998699	0.642938	0.0831714	0.648642	0.083828	0.58334	0.0763096	7.37543	0.401166	1.13336	0.130136	0.612195	0.0801058	1.49966	0.160465	0.748857	0.0943666	0.721556	0.0917482	1.29183	0.14273	1.74393	0.176335	0.669544	0.0873998
				1.14152	0.13043	0.632481	0.0829567	0.795493	0.101391	0.858351	0.105287	0.605561	0.0787927	0.856195	0.104024	0.602051	0.0779271	1.83391	0.180224	1.93719	0.189291	0.836828	0.102865	0.797816	0.0991822	0.635971	0.0826617	0.641272	0.0833878	0.577465	0.0756329	7.31406	0.397849	1.11915	0.129157	0.604971	0.0795463	1.47665	0.159561	0.740743	0.0936909	0.713483	0.0912837	1.28215	0.14187	1.7324	0.175211	0.661291	0.0869594
				1.13077	0.129612	0.624447	0.082413	0.780255	0.100348	0.849352	0.104515	0.600799	0.0782219	0.849799	0.103316	0.597682	0.077331	1.82158	0.178984	1.91864	0.188052	0.829429	0.102253	0.790001	0.0984144	0.629871	0.0820814	0.634815	0.0828678	0.572323	0.0749428	7.26027	0.394673	1.1067	0.128056	0.598645	0.0789153	1.45648	0.158451	0.733639	0.0929462	0.70641	0.0907328	1.27367	0.140965	1.7223	0.174108	0.654061	0.0864282
				1.12241	0.128746	0.618199	0.0818137	0.768404	0.0992085	0.842356	0.103704	0.597102	0.0776608	0.84483	0.102618	0.59429	0.0767815	1.812	0.177816	1.90422	0.186746	0.823677	0.101606	0.783929	0.0976288	0.62513	0.0814778	0.629796	0.08231	0.568332	0.0742953	7.21841	0.391895	1.09702	0.126923	0.59373	0.0782642	1.44079	0.157226	0.72812	0.0921928	0.70091	0.0901401	1.26709	0.140089	1.71445	0.173117	0.648438	0.0858491
				1.11712	0.127901	0.614242	0.0812073	0.760901	0.0980645	0.837932	0.102921	0.594769	0.077155	0.841693	0.101985	0.592149	0.0763231	1.80593	0.176816	1.89509	0.185478	0.820038	0.100975	0.780091	0.0968891	0.622134	0.0808995	0.62662	0.0817597	0.565814	0.0737429	7.19187	0.38974	1.0909	0.125849	0.590624	0.0776455	1.43085	0.155985	0.724634	0.0914916	0.697431	0.0895538	1.26293	0.139313	1.70948	0.172317	0.64488	0.0852691
				1.11533	0.127145	0.612898	0.0806429	0.758353	0.0970086	0.836436	0.102229	0.593989	0.0767453	0.84064	0.10147	0.591434	0.0759928	1.80389	0.176065	1.89198	0.184351	0.818807	0.100413	0.778799	0.096255	0.621124	0.0803936	0.625546	0.0812614	0.564974	0.0733304	7.18281	0.388384	1.08884	0.124922	0.589579	0.0771094	1.42747	0.154828	0.723463	0.0908996	0.696252	0.0890212	1.26153	0.1387	1.70781	0.171774	0.643673	0.0847351
				1.11718	0.126541	0.614276	0.0801664	0.760966	0.0961264	0.837991	0.101685	0.594824	0.076465	0.841757	0.101113	0.592202	0.0758175	1.80602	0.175622	1.89516	0.183457	0.820083	0.0999648	0.780157	0.0957781	0.622183	0.080001	0.626659	0.0808555	0.565879	0.073091	7.19196	0.387935	1.09099	0.124215	0.59068	0.0766994	1.43091	0.153849	0.724701	0.0904646	0.69747	0.0885855	1.263	0.1383	1.70955	0.171532	0.644915	0.0842905
				1.12252	0.126137	0.618263	0.0798162	0.768529	0.0954894	0.842471	0.101332	0.597208	0.0763369	0.844953	0.100944	0.594391	0.0758114	1.81216	0.175525	1.90436	0.182867	0.823765	0.0996662	0.784055	0.095497	0.625225	0.0797534	0.629869	0.0805749	0.568456	0.0730443	7.21858	0.388431	1.09719	0.123788	0.593837	0.0764486	1.4409	0.153127	0.728249	0.0902219	0.700986	0.088282	1.26723	0.138144	1.71458	0.171609	0.648507	0.0839712
				1.13092	0.125966	0.624537	0.0796207	0.78043	0.0951491	0.849512	0.101198	0.600947	0.0763711	0.84997	0.100976	0.597824	0.0759749	1.82182	0.175781	1.91884	0.18263	0.829552	0.0995418	0.790178	0.0954343	0.630003	0.079671	0.634918	0.0804423	0.572497	0.073194	7.26051	0.38983	1.10693	0.123673	0.598794	0.0763774	1.45663	0.152721	0.733819	0.0901911	0.706515	0.0881354	1.27387	0.138246	1.72248	0.172001	0.654157	0.083803
				1.1417	0.126042	0.63259	0.0795958	0.795704	0.0951331	0.858543	0.101296	0.605739	0.0765651	0.856401	0.101206	0.602222	0.0762948	1.8342	0.176369	1.93743	0.182765	0.836976	0.0996016	0.798028	0.0955952	0.63613	0.0797604	0.641395	0.0804684	0.577674	0.073528	7.31435	0.392021	1.11942	0.123882	0.60515	0.0764915	1.47683	0.152664	0.740959	0.0903749	0.713609	0.0881574	1.28239	0.138597	1.73262	0.172674	0.661407	0.0837997
				1.15399	0.126358	0.641768	0.0797435	0.813113	0.0954428	0.868835	0.101616	0.611194	0.0769031	0.863725	0.101617	0.607229	0.0767452	1.8483	0.177242	1.95862	0.18326	0.845436	0.0998408	0.806971	0.0959667	0.64311	0.0800145	0.648776	0.0806512	0.583567	0.0740192	7.37575	0.394824	1.13366	0.124395	0.612391	0.0767818	1.49985	0.152961	0.749092	0.0907581	0.721694	0.0883463	1.29209	0.139169	1.74417	0.173575	0.669669	0.0839615
				1.16679	0.126889	0.651329	0.0800519	0.831247	0.096053	0.879552	0.102133	0.616872	0.0773576	0.871349	0.102175	0.61244	0.0772896	1.86299	0.178329	1.98069	0.184077	0.854247	0.10024	0.816282	0.0965187	0.650378	0.0804125	0.656463	0.0809759	0.5897	0.0746279	7.43972	0.398014	1.14848	0.125173	0.619928	0.0772246	1.52384	0.153586	0.757558	0.0913099	0.730114	0.0886869	1.30219	0.139915	1.7562	0.174631	0.678276	0.0842753
				1.17906	0.127592	0.660498	0.0804959	0.848638	0.0969143	0.889826	0.102805	0.622312	0.077892	0.878655	0.102834	0.617433	0.0778839	1.87707	0.179541	2.00185	0.185148	0.862694	0.100767	0.825206	0.0972064	0.657344	0.0809222	0.663833	0.0814161	0.595575	0.0753046	7.50109	0.401331	1.1627	0.126152	0.627153	0.0777841	1.54685	0.15449	0.765672	0.0919856	0.738188	0.0891514	1.31187	0.140776	1.76773	0.175756	0.686529	0.0847156
				1.18981	0.128409	0.668532	0.0810395	0.863876	0.0979569	0.898825	0.103578	0.627073	0.0784628	0.885051	0.103542	0.621802	0.07848	1.8894	0.180782	2.0204	0.186387	0.870093	0.101379	0.833021	0.0979742	0.663445	0.0815025	0.670289	0.0819361	0.600716	0.0759947	7.55489	0.404507	1.17514	0.127253	0.633479	0.078415	1.56701	0.1556	0.772776	0.0927303	0.745261	0.0897023	1.32035	0.14168	1.77783	0.176858	0.693759	0.0852469
				1.19817	0.129276	0.67478	0.0816388	0.875727	0.0990964	0.90582	0.104388	0.63077	0.0790238	0.890019	0.10424	0.625194	0.0790295	1.89898	0.181949	2.03482	0.187693	0.875845	0.102026	0.839093	0.0987598	0.668185	0.0821061	0.675309	0.0824939	0.604708	0.0766422	7.59675	0.407285	1.18482	0.128386	0.638393	0.0790662	1.5827	0.156825	0.778294	0.0934837	0.75076	0.090295	1.32694	0.142556	1.78568	0.177849	0.699381	0.0858259
				1.20346	0.130121	0.678737	0.0822452	0.88323	0.10024	0.910245	0.105171	0.633103	0.0795297	0.893157	0.104872	0.627335	0.079488	1.90504	0.182949	2.04396	0.188961	0.879484	0.102656	0.842931	0.0994995	0.671182	0.0826844	0.678484	0.0830442	0.607226	0.0771946	7.62328	0.40944	1.19094	0.12946	0.641499	0.0796849	1.59264	0.158067	0.781781	0.0941849	0.75424	0.0908813	1.3311	0.143332	1.79065	0.178649	0.70294	0.086406
				1.20525	0.130876	0.680081	0.0828096	0.885778	0.101296	0.91174	0.105863	0.633883	0.0799394	0.89421	0.105388	0.62805	0.0798182	1.90709	0.183701	2.04706	0.190088	0.880715	0.103218	0.844223	0.100134	0.672192	0.0831903	0.679559	0.0835425	0.608066	0.0776071	7.63234	0.410796	1.19301	0.130387	0.642544	0.080221	1.59603	0.159224	0.782952	0.0947769	0.755419	0.0914139	1.3325	0.143945	1.79233	0.179192	0.704147	0.0869399
				Gray	Gray	Gray	Gray	Gray	Gray	Gray	Gray	Gray	Gray	Gray	Gray	Gray	Gray	Gray	Gray	Gray	Gray	Gray	Gray	Gray	Gray	Gray	Gray	Gray	Gray	Gray	Gray	Gray	Gray	Gray	Gray	Gray	Gray	Gray	Gray	Gray	Gray	Gray	Gray	Gray	Gray	Gray	Gray	Gray	Gray
[truncated: 206 more columns]

[truncated: 17 more sheets: PlotDat11, PlotDat12, PlotDat13, PlotDat1, PlotDat14, PlotDat15, Hoja4, PlotDat17, PlotDat16, PlotDat18, PlotDat20, PlotDat21, PlotDat22, PlotDat19, PlotDat23, PlotDat25, data table]
