# Supplementary material for: A tectonic carpet of Variscan flysch at the base of a rootless accretionary prism in northwestern Iberia: U–Pb zircon age constrains from sediments and volcanic olistoliths
Source: Copernicus journal article supplement (doi:10.5194/se-12-835-2021), 2021-04-15
Supplement: Supplementary file 5 [file se-12-835-2021-supplement.zip › SUPP TABLES/Supplementary Table 2_MEIZR01.xls]

## Sheet: PlotDat1
Source sheet	all data	0.2	494.697	1	442.99	6.34769	0.85	436.642
Plot name	Average0	34.8	494.697	2	467.276	7.49443	1.15	436.642
Plot Type	15			3	473.326	8.33428	1.15	449.338
1st free col	8			4	484.995	7.22857	0.85	449.338
Sigma Level	2			5	485.278	6.46039	0.85	436.642
Absolute Errs	TRUE			6	486.251	7.50047	ErrBox	ErrBox
Symbol Type	1			7	487.563	6.53287	1.85	459.781
Inverse Plot	FALSE			8	489.91	7.25726	2.15	459.781
Color Plot	TRUE			9	490.904	7.36976	2.15	474.77
3D plot	FALSE			10	491.774	6.23322	1.85	474.77
Linear	FALSE			11	491.889	7.11841	1.85	459.781
Data Range	AJ3:AK36			12	492.435	6.68383	ErrBox	ErrBox
Filled Symbols	TRUE			13	493.25	7.23	2.85	464.992
ConcAge	FALSE			14	493.708	7.18321	3.15	464.992
ConcSwap	FALSE			15	493.945	7.0644	3.15	481.661
1st Symbol-row	1			16	494.102	6.99485	2.85	481.661
				17	494.864	7.03764	2.85	464.992
				18	495.58	7.80939	ErrBox	ErrBox
				19	497.157	6.56788	3.85	477.767
				20	497.632	6.29664	4.15	477.767
				21	498.894	6.69989	4.15	492.224
				22	499.422	6.81638	3.85	492.224
				23	501.371	6.88896	3.85	477.767
				24	503.93	6.89621	ErrBox	ErrBox
				25	504.969	11.5556	4.85	478.817
				26	505.629	7.49162	5.15	478.817
				27	507.005	8.93671	5.15	491.738
				28	507.158	8.1878	4.85	491.738
				29	508.357	7.08046	4.85	478.817
				30	508.643	7.18005	ErrBox	ErrBox
				31	508.724	8.31951	5.85	478.75
				32	512.472	7.04275	6.15	478.75
				33	515.506	7.35562	6.15	493.751
				34	515.594	6.85609	5.85	493.751
				IsoLine	IsoLine	IsoLine	5.85	478.75
							ErrBox	ErrBox
							6.85	481.03
							7.15	481.03
							7.15	494.096
							6.85	494.096
							6.85	481.03
							ErrBox	ErrBox
							7.85	482.652
							8.15	482.652
							8.15	497.167
							7.85	497.167
							7.85	482.652
							ErrBox	ErrBox
							8.85	483.534
							9.15	483.534
							9.15	498.273
							8.85	498.273
							8.85	483.534
							ErrBox	ErrBox
							9.85	485.541
							10.15	485.541
							10.15	498.007
							9.85	498.007
							9.85	485.541
							ErrBox	ErrBox
							10.85	484.771
							11.15	484.771
							11.15	499.008
							10.85	499.008
							10.85	484.771
							ErrBox	ErrBox
							11.85	485.751
							12.15	485.751
							12.15	499.118
							11.85	499.118
							11.85	485.751
							ErrBox	ErrBox
							12.85	486.02
							13.15	486.02
							13.15	500.48
							12.85	500.48
							12.85	486.02
							ErrBox	ErrBox
							13.85	486.524
							14.15	486.524
							14.15	500.891
							13.85	500.891
							13.85	486.524
							ErrBox	ErrBox
							14.85	486.881
							15.15	486.881
							15.15	501.01
							14.85	501.01
							14.85	486.881
							ErrBox	ErrBox
							15.85	487.107
							16.15	487.107
							16.15	501.097
							15.85	501.097
							15.85	487.107
							ErrBox	ErrBox
							16.85	487.827
							17.15	487.827
							17.15	501.902
							16.85	501.902
							16.85	487.827
							ErrBox	ErrBox
							17.85	487.771
							18.15	487.771
							18.15	503.39
							17.85	503.39
							17.85	487.771
							ErrBox	ErrBox
							18.85	490.589
							19.15	490.589
							19.15	503.724
							18.85	503.724
							18.85	490.589
							ErrBox	ErrBox
							19.85	491.336
							20.15	491.336
							20.15	503.929
							19.85	503.929
							19.85	491.336
							ErrBox	ErrBox
							20.85	492.194
							21.15	492.194
							21.15	505.594
							20.85	505.594
							20.85	492.194
							ErrBox	ErrBox
							21.85	492.606
							22.15	492.606
							22.15	506.239
							21.85	506.239
							21.85	492.606
							ErrBox	ErrBox
							22.85	494.482
							23.15	494.482
							23.15	508.26
							22.85	508.26
							22.85	494.482
							ErrBox	ErrBox
							23.85	497.033
							24.15	497.033
							24.15	510.826
							23.85	510.826
							23.85	497.033
							ErrBox	ErrBox
							24.85	493.414
							25.15	493.414
							25.15	516.525
							24.85	516.525
							24.85	493.414
							ErrBox	ErrBox
							25.85	498.137
							26.15	498.137
							26.15	513.12
							25.85	513.12
							25.85	498.137
							ErrBox	ErrBox
							26.85	498.068
							27.15	498.068
							27.15	515.942
							26.85	515.942
							26.85	498.068
							ErrBox	ErrBox
							27.85	498.97
							28.15	498.97
							28.15	515.346
							27.85	515.346
							27.85	498.97
							ErrBox	ErrBox
							28.85	501.276
							29.15	501.276
							29.15	515.437
							28.85	515.437
							28.85	501.276
							ErrBox	ErrBox
							29.85	501.463
							30.15	501.463
							30.15	515.823
							29.85	515.823
							29.85	501.463
							ErrBox	ErrBox
							30.85	500.405
							31.15	500.405
							31.15	517.044
							30.85	517.044
							30.85	500.405
							ErrBox	ErrBox
							31.85	505.43
							32.15	505.43
							32.15	519.515
							31.85	519.515
							31.85	505.43
							ErrBox	ErrBox
							32.85	508.15
							33.15	508.15
							33.15	522.862
							32.85	522.862
							32.85	508.15
							ErrBox	ErrBox
							33.85	508.737
							34.15	508.737
							34.15	522.45
							33.85	522.45
							33.85	508.737
							ErrBox	ErrBox

## Sheet: PlotDat0
Source sheet	all data	1.53837	0.0658282	0	0	0.217708	0.0315113	1.63343	0.0660439	1.5793	0.0751777	1.97096	0.0843991	1.26591	0.0820331	0.959584	0.0729272	0.997022	0.0761095	1.55132	0.0925645	1.13527	0.0831945	0.668914	0.0635416	1.63884	0.107406	1.19235	0.09491	1.45499	0.104593	0.926124	0.0809455	0.676813	0.0701921	0.871362	0.08882	0.853396	0.0823293	0.756809	0.0811671	4.64087	0.237915	0.635041	0.0686899	3.30482	0.203169	1.21505	0.11342
Plot name	Concordia0	1.51187	0.0747781	0.0952711	0.0144371	0.482812	0.0640155	1.62958	0.066292	1.57657	0.0754666	1.96475	0.0848966	1.26223	0.0824262	0.958222	0.0732238	0.996203	0.0762732	1.54597	0.0931472	1.13334	0.0836179	0.667789	0.0638659	1.63154	0.107905	1.19021	0.0953131	1.44827	0.105041	0.922566	0.0813871	0.674896	0.0704884	0.87033	0.0891111	0.849606	0.0827949	0.756012	0.0814203	4.63638	0.23853	0.633211	0.0690562	3.30065	0.203911	1.21375	0.113782
Plot Type	1	1.81778	0.0838823	0.199619	0.0290825	0.805631	0.097544	1.61834	0.0665025	1.56859	0.0756997	1.94664	0.0853119	1.25148	0.082759	0.954258	0.0734401	0.993836	0.0763418	1.53036	0.0936357	1.12771	0.0839148	0.664533	0.0640793	1.61022	0.108344	1.18395	0.0956338	1.42867	0.105437	0.912182	0.081767	0.669305	0.0707417	0.867334	0.0893273	0.838546	0.0831991	0.753704	0.0815945	4.62334	0.238797	0.627875	0.0693621	3.28854	0.204302	1.21	0.114026
1st free col	55	1.17501	0.0816829	0.313908	0.0439395	1.19873	0.132129	1.60062	0.0666584	1.55602	0.0758582	1.91809	0.0856113	1.23453	0.0830047	0.948015	0.0735586	0.99011	0.0763099	1.50574	0.0939904	1.11885	0.084061	0.659411	0.0641645	1.5766	0.108686	1.1741	0.0958461	1.39777	0.105748	0.895815	0.0820543	0.660493	0.0709314	0.862616	0.0894512	0.821111	0.0835091	0.750075	0.0816755	4.60281	0.238693	0.619467	0.0695828	3.26947	0.20431	1.20409	0.114132
Sigma Level	2	0.926115	0.0722326	0.439085	0.0590109	1.67741	0.167804	1.57786	0.066747	1.53987	0.0759292	1.88141	0.0857707	1.21277	0.0831433	0.939997	0.0735696	0.985329	0.0761801	1.47412	0.0941825	1.10748	0.0840448	0.652836	0.0641146	1.53342	0.108904	1.16144	0.0959327	1.35807	0.10595	0.874789	0.0822259	0.649173	0.0710422	0.856559	0.0894725	0.798716	0.0836998	0.745416	0.0816569	4.57644	0.238228	0.608666	0.0697004	3.24499	0.203934	1.19651	0.114092
Absolute Errs	FALSE	0.977076	0.0751008	0.576189	0.0742999	2.2603	0.204603	1.5519	0.0667612	1.52146	0.0759069	1.83958	0.0857771	1.18794	0.0831636	0.930854	0.0734724	0.979879	0.0759628	1.43805	0.0941965	1.0945	0.0838674	0.645342	0.0639336	1.48417	0.10898	1.14701	0.0958866	1.31279	0.106026	0.850808	0.0822677	0.636263	0.0710651	0.849653	0.0893897	0.773173	0.0837556	0.740106	0.08154	4.54637	0.237438	0.596349	0.0697054	3.21707	0.203205	1.18787	0.113909
Symbol Type	1	1.41927	0.091984	0.726354	0.0898096	2.97009	0.242562	1.52484	0.0666998	1.50227	0.0757931	1.79598	0.08563	1.16207	0.0830639	0.921328	0.0732747	0.974202	0.0756757	1.40047	0.0940313	1.08099	0.0835432	0.637536	0.0636362	1.43284	0.108909	1.13196	0.0957116	1.26561	0.105969	0.825816	0.0821764	0.622808	0.0709982	0.842458	0.0892095	0.746552	0.0836722	0.734576	0.0813345	4.51504	0.236388	0.583512	0.0695975	3.18799	0.202181	1.17887	0.113598
Inverse Plot	FALSE	1.08778	0.0820556	0.890826	0.105543	3.83441	0.281716	1.49888	0.0665678	1.48385	0.0755972	1.75415	0.0853413	1.13725	0.0828524	0.912189	0.0729925	0.968758	0.075342	1.3644	0.0937002	1.06802	0.0830985	0.63005	0.0632465	1.38359	0.108695	1.11753	0.0954219	1.22033	0.105785	0.801837	0.0819595	0.609899	0.070847	0.835556	0.0889463	0.72101	0.0834562	0.729272	0.0810568	4.48499	0.235163	0.571196	0.0693852	3.1601	0.200946	1.17023	0.113184
Color Plot	TRUE	0.641488	0.0624967	1.07097	0.121504	4.8869	0.322105	1.47612	0.0663758	1.4677	0.0753348	1.71747	0.0849344	1.11548	0.0825461	0.904179	0.0726488	0.963987	0.0749888	1.33278	0.09323	1.05666	0.0825693	0.623491	0.062796	1.34041	0.108356	1.10488	0.0950409	1.18063	0.105489	0.780813	0.0816344	0.59858	0.0706237	0.829508	0.0886216	0.698616	0.0831252	0.724625	0.0807296	4.45865	0.233862	0.560399	0.0690859	3.13565	0.1996	1.16267	0.1127
3D plot	FALSE	1.45851	0.107154	1.26827	0.137695	6.16853	0.363766	1.4584	0.0661395	1.45514	0.0750274	1.68892	0.0844422	1.09854	0.0821698	0.897945	0.0722714	0.960278	0.0746447	1.30817	0.092659	1.04781	0.0819985	0.61839	0.0623213	1.3068	0.10792	1.09503	0.0945995	1.14973	0.105103	0.764447	0.0812275	0.58977	0.0703464	0.824802	0.0882617	0.681184	0.0827059	0.721011	0.0803792	4.43815	0.232591	0.551996	0.0687238	3.11663	0.198251	1.15678	0.112185
Linear	FALSE	1.1395	0.0942952	1.48437	0.15412	7.72917	0.40674	1.44716	0.065878	1.44717	0.0746998	1.67081	0.0839047	1.0878	0.0817542	0.893994	0.0718909	0.957929	0.0743375	1.29256	0.0920332	1.04221	0.0814323	0.61516	0.0618608	1.28547	0.107422	1.08879	0.0941334	1.13013	0.10466	0.754067	0.0807719	0.584182	0.0700376	0.82182	0.0878957	0.670126	0.0822323	0.718723	0.0800342	4.42516	0.231452	0.546666	0.0683282	3.10458	0.19701	1.15305	0.111683
Data Range	B3:F151	1.2892	0.104394	1.72106	0.170782	9.62957	0.451068	1.44331	0.0656124	1.44444	0.0743785	1.66461	0.0833654	1.08412	0.0813327	0.892645	0.071538	0.957131	0.0740921	1.28721	0.0914035	1.0403	0.0809167	0.614063	0.0614518	1.27817	0.106902	1.08665	0.0936805	1.12341	0.104196	0.750512	0.0803043	0.582269	0.0697223	0.820804	0.0875533	0.666339	0.0817429	0.717947	0.0797225	4.42073	0.230537	0.544842	0.0679312	3.10047	0.195976	1.15179	0.111232
Filled Symbols	FALSE	0.838318	0.0806249	1.9803	0.187685	11.9437	0.496793	1.44716	0.0653643	1.44717	0.0740896	1.67082	0.0828679	1.0878	0.0809396	0.894007	0.0712414	0.95795	0.0739285	1.29256	0.0908207	1.04223	0.0804932	0.615188	0.0611275	1.28548	0.106403	1.0888	0.0932773	1.13013	0.103748	0.75407	0.0798626	0.584185	0.069426	0.821836	0.0872621	0.670129	0.0812772	0.718744	0.0794693	4.42521	0.229922	0.546672	0.0675649	3.10464	0.195233	1.15308	0.11087
ConcAge	FALSE	0.629541	0.0699572	2.26423	0.204832	IsoLine	IsoLine	1.4584	0.0651538	1.45514	0.0738565	1.68893	0.0824526	1.09855	0.0806068	0.897971	0.0710251	0.960317	0.0738598	1.30818	0.0903323	1.04786	0.0801964	0.618443	0.0609141	1.3068	0.105964	1.09505	0.0929566	1.14973	0.103352	0.764454	0.0794828	0.589776	0.0691728	0.824832	0.0870459	0.681189	0.080873	0.721051	0.0792951	4.43825	0.229655	0.552008	0.067259	3.11675	0.194842	1.15683	0.110626
ConcSwap	FALSE	0.846083	0.0881866	2.57522	0.222226			1.47612	0.0649979	1.46771	0.073698	1.71748	0.0821532	1.11549	0.0803611	0.904215	0.0709066	0.964043	0.0738917	1.3328	0.0899776	1.05672	0.0800502	0.623566	0.0608289	1.34041	0.105622	1.10491	0.0927444	1.18064	0.103041	0.780821	0.0791954	0.598588	0.068983	0.82955	0.0869221	0.698624	0.080563	0.724681	0.079214	4.45879	0.229759	0.560416	0.0670382	3.13582	0.194834	1.16274	0.110519
1st Symbol-row	201	0.759868	0.0820361	2.91584	0.239871			1.49889	0.0649093	1.48386	0.073627	1.75416	0.0819938	1.13726	0.0802225	0.912233	0.0708955	0.968824	0.0740215	1.36442	0.0897855	1.06809	0.0800664	0.630141	0.0608788	1.38359	0.105404	1.11756	0.0926578	1.22033	0.102839	0.801847	0.0790239	0.609908	0.0688723	0.835607	0.0869007	0.721019	0.0803724	0.72934	0.0792326	4.48516	0.230224	0.571217	0.0669206	3.1603	0.19521	1.17032	0.110559
		0.737378	0.0804448	3.2889	0.257771			1.52485	0.0648951	1.50228	0.0736493	1.79599	0.0819874	1.16208	0.0802022	0.921375	0.0709928	0.974274	0.0742388	1.40048	0.0897715	1.08107	0.0802438	0.637634	0.0610598	1.43284	0.105327	1.132	0.0927038	1.26561	0.102763	0.825828	0.078982	0.622819	0.0688494	0.842513	0.0869835	0.746562	0.0803165	0.734649	0.0793495	4.51522	0.231014	0.583535	0.0669156	3.18821	0.195939	1.17897	0.110742
		4.5308	0.234226	3.69751	0.27593			1.5519	0.0649565	1.52147	0.0737631	1.83959	0.0821345	1.18796	0.0803019	0.930902	0.0711905	0.979951	0.0745259	1.43807	0.0899367	1.09458	0.080568	0.645441	0.0613572	1.48417	0.105399	1.14704	0.0928788	1.3128	0.10282	0.85082	0.0790733	0.636274	0.0689162	0.849708	0.0871638	0.773183	0.0804	0.74018	0.0795551	4.54655	0.232064	0.596371	0.0670235	3.21729	0.196963	1.18797	0.111054
		0.589942	0.0683105	4.14505	0.29435			1.57787	0.0650886	1.53989	0.073959	1.88142	0.0824232	1.21278	0.0805135	0.94004	0.0714726	0.985395	0.0748596	1.47413	0.0902678	1.10755	0.0810127	0.652926	0.0617469	1.53342	0.105613	1.16147	0.0931685	1.35807	0.103004	0.874799	0.0792903	0.649183	0.0690674	0.85661	0.0874269	0.798725	0.080616	0.745484	0.0798327	4.5766	0.233289	0.608687	0.0672358	3.24519	0.198198	1.1966	0.111468
		3.20264	0.199572	4.63522	0.313037			1.60063	0.0652805	1.55603	0.0742214	1.9181	0.0828301	1.23454	0.0808198	0.948051	0.0718163	0.990166	0.0752128	1.50575	0.0907379	1.11891	0.0815418	0.659486	0.0621974	1.5766	0.105952	1.17413	0.0935496	1.39777	0.1033	0.895823	0.0796153	0.660501	0.0692907	0.862658	0.0877516	0.82112	0.080947	0.750131	0.08016	4.60295	0.23459	0.619484	0.0675351	3.26964	0.199544	1.20417	0.111952
		1.18342	0.112326	5.1721	0.331993			1.61835	0.0655168	1.5686	0.0745288	1.94664	0.0833223	1.25148	0.081196	0.954284	0.0721937	0.993875	0.075557	1.53037	0.091309	1.12776	0.0821126	0.664587	0.0626721	1.61022	0.106388	1.18397	0.093991	1.42867	0.103686	0.912189	0.0800222	0.669311	0.069568	0.867364	0.0881115	0.838551	0.0813663	0.753745	0.0805103	4.62344	0.235861	0.627888	0.0678972	3.28866	0.200893	1.21005	0.112466
		0.759075	0.0827189	5.76012	0.351224			1.62958	0.0657784	1.57657	0.0748564	1.96475	0.0838598	1.26223	0.0816117	0.958235	0.0725743	0.996224	0.0758642	1.54598	0.0919348	1.13336	0.0826788	0.667817	0.0631326	1.63154	0.106886	1.19022	0.094457	1.44827	0.104129	0.922569	0.0804779	0.674899	0.0698768	0.870346	0.0884775	0.849609	0.0818398	0.756033	0.0808553	4.63643	0.237	0.633217	0.0682928	3.30071	0.202135	1.21378	0.112969
		0.620082	0.0714917	6.40417	0.370731			1.63343	0.0660439	1.5793	0.0751777	1.97096	0.0843991	1.26591	0.0820331	0.959584	0.0729272	0.997022	0.0761095	1.55132	0.0925645	1.13527	0.0831945	0.668914	0.0635416	1.63884	0.107406	1.19235	0.09491	1.45499	0.104593	0.926124	0.0809455	0.676813	0.0701921	0.871362	0.08882	0.853396	0.0823293	0.756809	0.0811671	4.64087	0.237915	0.635041	0.0686899	3.30482	0.203169	1.21505	0.11342
		0.985247	0.100523	7.10957	0.390521			Black	Black	Black	Black	Black	Black	Black	Black	Black	Black	Black	Black	Black	Black	Black	Black	Black	Black	Black	Black	Black	Black	Black	Black	Black	Black	Black	Black	Black	Black	Black	Black	Black	Black	Black	Black	Black	Black	Black	Black	Black	Black
		0.72241	0.0814292	7.88218	0.410596
		0.691066	0.0788008	8.72839	0.43096
		0.581635	0.0698288	9.65523	0.451619
		0.735201	0.0840009	10.6704	0.472576
		0.67434	0.0787619	11.7822	0.493836
		0.716931	0.0829257	13	0.515403
		0.609898	0.0733695	13	0.515403
		0.818843	0.0918929	IsoLine	IsoLine
		0.614603	0.0738154
		0.613186	0.0737749
		0.728641	0.0844172
		0.605382	0.0732152
		10.0206	0.381985
		0.609837	0.0737738
		0.586025	0.0716594
		0.536996	0.0668303
		0.670941	0.0797439
		0.593671	0.0726739
		0.573384	0.0706965
		0.545959	0.0679836
		0.675622	0.0809297
		0.59571	0.0733663
		0.614327	0.0753175
		0.620661	0.0759762
		0.631527	0.0771113
		0.557983	0.0698986
		0.823682	0.095035
		0.570626	0.0715362
		1.59991	0.154564
		1.04101	0.11465
		0.59616	0.0745943
		0.737809	0.0884513
		0.63304	0.0783765
		0.672039	0.0822328
		0.630517	0.0782081
		0.64211	0.0795954
		0.642066	0.0796353
		0.666859	0.0820997
		0.693544	0.0847958
		0.642463	0.0797892
		0.727926	0.0884016
		0.633665	0.079126
		0.887726	0.103248
		0.90328	0.104673
		0.604368	0.0761876
		0.634733	0.079291
		0.655962	0.0814831
		0.674151	0.0834993
		0.659929	0.0821133
		0.670193	0.0832523
		0.639282	0.0801732
		0.590566	0.0751779
		0.631347	0.0795188
		0.640335	0.0804643
		0.621493	0.0785669
		0.634415	0.0799092
		0.867605	0.102531
		1.30096	0.138855
		0.676609	0.0842756
		5.63193	0.34107
		0.624497	0.0789596
		0.63691	0.0802529
		0.61654	0.0781846
		0.68067	0.0847649
		0.648559	0.0815937
		0.845533	0.10095
		0.651352	0.0820516
		0.669409	0.0839051
		0.624286	0.0792717
		0.649141	0.0818504
		1.11529	0.125079
		0.738074	0.0908893
		0.61241	0.0781374
		0.665788	0.0836957
		0.634998	0.0805529
		1.57309	0.160685
		0.661065	0.083267
		0.849474	0.101798
		0.646592	0.0818247
		0.545997	0.071135
		0.946543	0.110921
		0.624956	0.0796615
		0.740525	0.0914657
		0.612231	0.0783474
		0.63628	0.0808797
		0.67734	0.0852138
		1.04888	0.120251
		0.65325	0.0827426
		0.620978	0.0793823
		0.71514	0.0891516
		0.967911	0.113318
		0.685085	0.086145
		0.672259	0.0848629
		0.722435	0.0899899
		0.697677	0.0874873
		0.954336	0.112225
		0.692263	0.0869702
		0.660261	0.0836722
		0.827621	0.100496
		0.841839	0.101919
		0.719479	0.089977
		0.712842	0.0893522
		0.707299	0.0888851
		8.56624	0.444488
		0.668437	0.0849901
		0.667503	0.0849394
		0.632765	0.0813087
		0.9395	0.111828
		0.678372	0.086149
		6.59591	0.393205
		0.826366	0.101357
		0.725247	0.0912692
		0.651718	0.0836986
		1.04485	0.122285
		0.79999	0.099429
		0.73425	0.0928024
		9.57106	0.487283
		0.609569	0.0796216
		0.601793	0.0787677
		1.00938	0.120559
		0.721354	0.0921989
		0.710983	0.091633
		0.698226	0.0906358
		0.855379	0.10848
		0.763893	0.100055
		IsoLine	IsoLine
				0.751593	0.0904566	0.737876	0.0906694	0.734953	0.0893471	8.74225	0.450212	0.699068	0.0854886	0.684937	0.0858438	0.656706	0.0819613	0.988494	0.112339	0.693432	0.0870386	6.71306	0.398069	0.854078	0.102051	0.748354	0.0920721	0.67467	0.0842774	1.10025	0.123995	0.826653	0.10037	0.76794	0.0935268	9.85771	0.492572	0.646568	0.0799026	0.631247	0.0793755	1.04613	0.121563	0.756021	0.0929597	0.74264	0.0926837	0.728876	0.0917299
				0.750287	0.0908038	0.736839	0.0910509	0.733827	0.0896605	8.73508	0.451224	0.697821	0.0858346	0.684215	0.0861133	0.655727	0.0822886	0.986504	0.112783	0.692807	0.0872703	6.70827	0.398775	0.852945	0.102408	0.747405	0.092405	0.673732	0.0845833	1.09798	0.124729	0.825558	0.100752	0.766565	0.0939476	9.84606	0.494333	0.645067	0.0802097	0.630046	0.0797461	1.04463	0.122041	0.754607	0.093399	0.741341	0.0931427	0.727616	0.0921849
				0.746485	0.091084	0.733858	0.0912948	0.730552	0.089911	8.71424	0.45169	0.694194	0.0861122	0.682139	0.0862877	0.652887	0.0825365	0.980707	0.113149	0.691011	0.0874112	6.69439	0.39903	0.84966	0.10268	0.744661	0.0926459	0.67101	0.0848175	1.09141	0.125265	0.822392	0.101027	0.762573	0.0942756	9.81214	0.495523	0.64069	0.0804692	0.626555	0.0800375	1.04027	0.122398	0.750498	0.0937411	0.737583	0.0934794	0.723976	0.0925144
				0.740495	0.0912745	0.729174	0.0913813	0.725394	0.0900784	8.6814	0.451572	0.68848	0.0862989	0.678877	0.0863528	0.648417	0.0826849	0.971571	0.113408	0.688192	0.0874498	6.67252	0.398814	0.844488	0.102845	0.740345	0.0927753	0.666726	0.0849611	1.08106	0.12556	0.817411	0.101172	0.756286	0.0944843	9.75868	0.496046	0.633792	0.08066	0.621059	0.080226	1.03341	0.122607	0.744029	0.0939582	0.731669	0.0936665	0.718249	0.0926917
				0.732802	0.0913599	0.723167	0.0913035	0.718769	0.0901492	8.63923	0.450881	0.681142	0.0863796	0.674694	0.0863035	0.642679	0.0827218	0.959837	0.113539	0.684577	0.0873831	6.64445	0.398143	0.837847	0.10289	0.734805	0.0927827	0.661226	0.0850024	1.06778	0.12559	0.811018	0.101176	0.748214	0.0945567	9.69002	0.495859	0.624931	0.0807666	0.614002	0.0802963	1.0246	0.12265	0.735722	0.0940328	0.72408	0.0936889	0.710901	0.0927025
				0.72403	0.0913332	0.716324	0.0910675	0.711215	0.0901175	8.59115	0.449672	0.672775	0.0863476	0.669928	0.0861436	0.636138	0.0826443	0.946456	0.113532	0.680459	0.0872163	6.61245	0.397071	0.830276	0.10281	0.728491	0.0926674	0.654955	0.0849381	1.05264	0.125351	0.803733	0.101039	0.73901	0.094487	9.61172	0.494977	0.614826	0.0807805	0.605956	0.0802429	1.01456	0.122524	0.726252	0.0939589	0.71543	0.0935447	0.702525	0.0925458
				0.71489	0.0911967	0.709198	0.0906925	0.703344	0.089986	8.54105	0.448042	0.664057	0.0862057	0.664966	0.0858862	0.629324	0.0824585	0.932511	0.113386	0.676173	0.0869631	6.57911	0.395687	0.822389	0.102612	0.721914	0.0924389	0.648423	0.0847733	1.03687	0.124865	0.796144	0.100771	0.729421	0.0942808	9.53013	0.493471	0.604295	0.0807005	0.597573	0.0800699	1.00409	0.122238	0.716384	0.0937423	0.706419	0.0932456	0.693801	0.0922345
				0.706121	0.0909613	0.702368	0.090209	0.695793	0.0897653	8.49299	0.446125	0.655694	0.0859653	0.660209	0.0855521	0.622788	0.0821796	0.919132	0.113115	0.672064	0.086644	6.54713	0.394102	0.814824	0.102313	0.715607	0.0921156	0.642157	0.0845215	1.02175	0.124169	0.788866	0.100394	0.720223	0.0939549	9.45186	0.491465	0.594191	0.0805331	0.589532	0.0797914	0.99406	0.121817	0.70692	0.0934007	0.697778	0.0928159	0.685436	0.0917936
				0.698435	0.0906463	0.696386	0.0896561	0.689175	0.0894733	8.45087	0.444075	0.648363	0.0856459	0.656043	0.0851683	0.61706	0.0818302	0.907404	0.112739	0.668466	0.0862847	6.5191	0.392443	0.808194	0.101936	0.710081	0.0917237	0.636666	0.084203	1.0085	0.123321	0.78249	0.0999394	0.712161	0.0935356	9.38324	0.489119	0.585333	0.0802919	0.582484	0.07943	0.985267	0.121293	0.698624	0.0929617	0.690207	0.0922903	0.678107	0.0912589
				0.692453	0.090277	0.691738	0.0890785	0.684025	0.0891337	8.41809	0.442059	0.642658	0.0852734	0.652806	0.084766	0.612605	0.0814385	0.898275	0.112289	0.665671	0.0859144	6.49729	0.390847	0.803036	0.101513	0.705784	0.091295	0.632394	0.0838437	0.99819	0.122389	0.777532	0.0994432	0.705889	0.0930569	9.32984	0.486625	0.578439	0.0799963	0.577	0.079015	0.978426	0.12071	0.692171	0.092461	0.684319	0.0917115	0.672408	0.0906737
				0.688661	0.0898833	0.688799	0.0885231	0.68076	0.0887739	8.39731	0.44024	0.639042	0.0848779	0.650759	0.0843777	0.609783	0.0810363	0.892487	0.111802	0.663905	0.0855632	6.48348	0.389442	0.799768	0.101076	0.703063	0.0908642	0.629688	0.0834726	0.991662	0.121448	0.774393	0.0989458	0.701914	0.0925576	9.29598	0.484184	0.574066	0.0796704	0.573525	0.0785799	0.974093	0.120115	0.688081	0.091939	0.680592	0.0911264	0.6688	0.0900855
				0.687366	0.0894973	0.687807	0.0880349	0.679645	0.0884231	8.39023	0.438764	0.637807	0.0844915	0.650069	0.084035	0.608823	0.0806561	0.890507	0.111317	0.663311	0.0852594	6.47877	0.388341	0.798655	0.100663	0.70214	0.0904663	0.628766	0.0831198	0.989443	0.120575	0.773327	0.0984876	0.700559	0.0920781	9.2844	0.481995	0.57257	0.0793405	0.57234	0.07816	0.972618	0.119556	0.686687	0.091438	0.679326	0.0905822	0.667576	0.0895418
				0.688672	0.0891502	0.688844	0.0876534	0.680771	0.0881097	8.3974	0.437753	0.639054	0.0841455	0.650791	0.0837655	0.609803	0.0803288	0.892496	0.110873	0.663937	0.0850277	6.48355	0.387635	0.799787	0.100306	0.703089	0.0901333	0.629704	0.0828139	0.991712	0.119841	0.774422	0.0981056	0.701934	0.0916573	9.29605	0.480233	0.574071	0.0790334	0.573541	0.0777894	0.974121	0.119078	0.688102	0.0909987	0.680625	0.0901232	0.668836	0.0890868
				0.692474	0.08887	0.691825	0.0874095	0.684046	0.0878592	8.41824	0.437287	0.642681	0.0838679	0.652867	0.0835911	0.612642	0.0800809	0.898294	0.110507	0.665732	0.0848868	6.49744	0.38738	0.803073	0.100033	0.705833	0.0898924	0.632426	0.0825796	0.998286	0.119305	0.777589	0.0978308	0.705926	0.0913293	9.32998	0.479043	0.578448	0.078774	0.577031	0.077498	0.97848	0.11872	0.69221	0.0906566	0.684383	0.0897865	0.672476	0.0887573
				0.698464	0.0886795	0.696509	0.087323	0.689205	0.0876918	8.45108	0.437404	0.648395	0.0836812	0.656129	0.0835259	0.617112	0.0799325	0.90743	0.110248	0.668551	0.0848481	6.5193	0.387596	0.808245	0.0998686	0.710149	0.089763	0.63671	0.082436	1.00863	0.11901	0.78257	0.0976855	0.712213	0.0911206	9.38344	0.478521	0.585346	0.0785832	0.582527	0.0773095	0.985343	0.118512	0.69868	0.0904395	0.690297	0.0895994	0.678202	0.0885799
				0.706157	0.0885941	0.702516	0.0874009	0.695829	0.087621	8.49325	0.438096	0.655732	0.0836005	0.660312	0.0835753	0.62285	0.0798956	0.919163	0.110117	0.672166	0.0849149	6.54737	0.388268	0.814886	0.0998242	0.715689	0.0897556	0.64221	0.0823947	1.02191	0.118981	0.788962	0.0976814	0.720285	0.0910482	9.45209	0.478708	0.594207	0.0784765	0.589584	0.0772391	0.994152	0.118469	0.706986	0.0903649	0.697886	0.0895771	0.685551	0.0885692
				0.714928	0.0886208	0.709359	0.0876368	0.703383	0.0876527	8.54133	0.439305	0.664099	0.0836325	0.665078	0.0837351	0.629391	0.0799731	0.932545	0.110124	0.676284	0.0850816	6.57937	0.389339	0.822457	0.0999041	0.722003	0.0898709	0.648481	0.0824591	1.03705	0.119219	0.796248	0.097819	0.729489	0.0911179	9.53039	0.47959	0.604312	0.0784626	0.59763	0.0772926	1.00419	0.118595	0.716457	0.0904389	0.706536	0.0897213	0.693927	0.0887258
				0.724069	0.0887573	0.716485	0.0880118	0.711254	0.0877842	8.59143	0.440934	0.672817	0.0837744	0.67004	0.0839925	0.636206	0.0801589	0.94649	0.110269	0.680571	0.0853348	6.61272	0.390723	0.830344	0.100102	0.72858	0.0900994	0.655014	0.0826238	1.05282	0.119706	0.803837	0.0980869	0.739078	0.0913241	9.61198	0.481095	0.614843	0.0785426	0.606014	0.0774656	1.01466	0.118881	0.726324	0.0906554	0.715547	0.0900203	0.70265	0.0890372
				0.732838	0.0889926	0.723315	0.0884953	0.718805	0.0880049	8.63949	0.442851	0.681181	0.0840148	0.674797	0.0843267	0.642741	0.0804378	0.959869	0.110541	0.684679	0.085654	6.6447	0.392309	0.837909	0.100401	0.734887	0.0904227	0.661279	0.0828756	1.06794	0.120401	0.811114	0.0984636	0.748276	0.09165	9.69026	0.483102	0.624947	0.07871	0.614055	0.077744	1.02469	0.119302	0.735789	0.090997	0.724188	0.09045	0.711016	0.0894781
				0.740524	0.0893077	0.729297	0.0890482	0.725423	0.0882969	8.68161	0.444901	0.688512	0.0843342	0.678963	0.0847104	0.648469	0.0807872	0.971597	0.110917	0.688277	0.0860133	6.67273	0.393967	0.844539	0.100778	0.740413	0.0908146	0.666771	0.0831941	1.08119	0.121249	0.81749	0.0989185	0.756338	0.0920693	9.75887	0.485447	0.633805	0.0789512	0.621103	0.0781055	1.03349	0.119826	0.744084	0.091436	0.731759	0.0909756	0.718345	0.0900128
				0.746506	0.089677	0.733946	0.0896258	0.730574	0.0886366	8.71439	0.446917	0.694217	0.0847067	0.6822	0.0851127	0.652924	0.0811789	0.980725	0.111367	0.691072	0.0863835	6.69453	0.395563	0.849697	0.101201	0.74471	0.0912433	0.671042	0.0835534	1.0915	0.122182	0.822449	0.0994147	0.76261	0.092548	9.81228	0.487941	0.640699	0.0792468	0.626587	0.0785205	1.04033	0.120408	0.750538	0.0919368	0.737647	0.0915544	0.724044	0.090598
				0.750298	0.0900706	0.736885	0.0901812	0.733838	0.0889964	8.73517	0.448737	0.697833	0.0851022	0.684247	0.085501	0.655746	0.0815811	0.986514	0.111854	0.692838	0.0867348	6.70835	0.396968	0.852965	0.101637	0.747431	0.0916741	0.673748	0.0839246	1.09803	0.123122	0.825588	0.0999121	0.766585	0.0930473	9.84614	0.490382	0.645072	0.0795727	0.630062	0.0789556	1.04466	0.121004	0.754627	0.0924588	0.741374	0.0921396	0.727652	0.0911862
				0.751593	0.0904566	0.737876	0.0906694	0.734953	0.0893471	8.74225	0.450212	0.699068	0.0854886	0.684937	0.0858438	0.656706	0.0819613	0.988494	0.112339	0.693432	0.0870386	6.71306	0.398069	0.854078	0.102051	0.748354	0.0920721	0.67467	0.0842774	1.10025	0.123995	0.826653	0.10037	0.76794	0.0935268	9.85771	0.492572	0.646568	0.0799026	0.631247	0.0793755	1.04613	0.121563	0.756021	0.0929597	0.74264	0.0926837	0.728876	0.0917299
				Black	Black	Black	Black	Black	Black	Black	Black	Black	Black	Black	Black	Black	Black	Black	Black	Black	Black	Black	Black	Black	Black	Black	Black	Black	Black	Black	Black	Black	Black	Black	Black	Black	Black	Black	Black	Black	Black	Black	Black	Black	Black	Black	Black	Black	Black
[truncated: 206 more columns]

## Sheet: PlotDat2
Source sheet	all data	0.545997	0.071135	0	0	0.217708	0.0315113	0.575546	0.0715681	0.624664	0.0757174	0.687167	0.0764651	0.635531	0.0788809	0.633895	0.0789814	0.635997	0.0791242	0.637087	0.0794774	0.647755	0.0797125	0.658027	0.0798767	0.648899	0.0797943	0.659255	0.0799867	0.640497	0.0801359	0.648587	0.0805328	0.670952	0.0802024	0.671187	0.0802164	0.647157	0.0803894	0.663274	0.0805963	0.674852	0.0804126	0.658338	0.0809341	0.653915	0.0810333	0.663211	0.0811225
Plot name	Concordia0	0.590566	0.0751779	0.0894646	0.0135881	0.482812	0.0640155	0.574344	0.071893	0.623276	0.0760986	0.683811	0.0769269	0.634583	0.0792109	0.633178	0.0792462	0.635022	0.0794656	0.636439	0.0797164	0.646801	0.0800429	0.657029	0.0802151	0.647895	0.0801013	0.658251	0.0803194	0.639694	0.0804274	0.647871	0.0807958	0.669776	0.0805555	0.669999	0.0805662	0.646247	0.0807077	0.662418	0.0809002	0.673209	0.0808201	0.657553	0.0812162	0.653213	0.0812914	0.662275	0.0814356
Plot Type	1	0.604368	0.0761876	0.186933	0.0273608	0.805631	0.097544	0.570845	0.0721564	0.619239	0.0764052	0.67402	0.0773288	0.631839	0.079454	0.631114	0.079425	0.6322	0.0797164	0.634581	0.0798622	0.64404	0.0802855	0.654138	0.0804652	0.644978	0.080341	0.655342	0.0805688	0.637374	0.0806342	0.645816	0.0809554	0.666359	0.0808307	0.666549	0.0808407	0.643611	0.0809412	0.659945	0.0811142	0.668423	0.0811538	0.655289	0.0814137	0.65119	0.0814653	0.659561	0.0816699
1st free col	163	0.61241	0.0781374	0.293122	0.0413206	1.19873	0.132129	0.565334	0.0723371	0.612878	0.0766123	0.658585	0.0776382	0.62752	0.0795903	0.627868	0.0795034	0.627761	0.0798564	0.631662	0.0799032	0.639696	0.0804207	0.649588	0.0806069	0.640385	0.0804942	0.650764	0.0807148	0.633727	0.0807395	0.642589	0.0809985	0.660977	0.081006	0.661116	0.0810175	0.639464	0.081071	0.656056	0.0812208	0.660881	0.0813867	0.651727	0.0815108	0.64801	0.081541	0.655289	0.0818066
Sigma Level	2	0.61654	0.0781846	0.40881	0.0554701	1.67741	0.167804	0.558256	0.0724204	0.60471	0.0767033	0.638759	0.0778301	0.621978	0.079609	0.623705	0.0794749	0.622064	0.079874	0.627919	0.0798358	0.634121	0.0804375	0.643749	0.0806286	0.634488	0.0805483	0.644887	0.0807453	0.629046	0.0807349	0.638451	0.0809218	0.654066	0.0810669	0.654139	0.0810823	0.634142	0.0810867	0.651066	0.0812114	0.651196	0.0814999	0.647158	0.0814995	0.643931	0.0815123	0.649806	0.0818345
Absolute Errs	FALSE	0.612231	0.0783474	0.534849	0.0698119	2.2603	0.204603	0.550185	0.0723996	0.595396	0.0766707	0.616146	0.0778889	0.61566	0.0795084	0.618962	0.0793419	0.61557	0.079768	0.623656	0.0796657	0.627766	0.0803345	0.637092	0.0805285	0.627764	0.0804989	0.638187	0.0806581	0.623712	0.0806207	0.633738	0.0807314	0.646187	0.0810087	0.646184	0.0810299	0.628075	0.0809869	0.645379	0.0810867	0.640151	0.0814842	0.64195	0.0813807	0.639283	0.0813817	0.643556	0.0817514
Symbol Type	1	0.621493	0.0785669	0.672164	0.0843486	2.97009	0.242562	0.541774	0.0722763	0.585691	0.0765171	0.592579	0.0778099	0.609079	0.0792968	0.614022	0.0791151	0.608806	0.0795469	0.619218	0.0794066	0.621146	0.0801202	0.630158	0.0803149	0.620759	0.0803502	0.631207	0.0804601	0.618156	0.0804062	0.628831	0.0804428	0.637978	0.0808359	0.637896	0.0808645	0.621756	0.0807797	0.639456	0.080857	0.628641	0.0813409	0.636526	0.0811642	0.634443	0.0811595	0.637045	0.081564
Inverse Plot	FALSE	0.624497	0.0789596	0.821763	0.0990828	3.83441	0.281716	0.533706	0.0720605	0.576381	0.0762551	0.569967	0.0775995	0.602768	0.0789912	0.609287	0.0788129	0.602319	0.0792286	0.614964	0.0790794	0.614798	0.0798119	0.623507	0.0800049	0.614039	0.080114	0.624513	0.0801673	0.612829	0.0801088	0.624128	0.0800793	0.630103	0.0805627	0.629945	0.0805995	0.615696	0.080482	0.633776	0.0805408	0.617599	0.0810817	0.631325	0.0808673	0.629803	0.080864	0.6308	0.0812876
Color Plot	TRUE	0.633665	0.079126	0.984747	0.114017	4.8869	0.322105	0.526633	0.0717698	0.568219	0.0759058	0.550142	0.0772747	0.597238	0.0786165	0.605139	0.0784598	0.596635	0.0788389	0.611238	0.0787107	0.609235	0.0794345	0.61768	0.0796237	0.60815	0.0798097	0.618647	0.0798036	0.608162	0.0797524	0.62001	0.0796704	0.623202	0.080211	0.622976	0.0802564	0.610386	0.0801177	0.6288	0.0801636	0.607919	0.0807274	0.626769	0.0805142	0.625738	0.0805189	0.625328	0.0809445
3D plot	FALSE	0.624286	0.0792717	1.16231	0.129155	6.16853	0.363766	0.521129	0.0714276	0.561869	0.0754975	0.53471	0.0768618	0.592937	0.0782029	0.601914	0.0780845	0.592215	0.0784094	0.608344	0.0783304	0.604909	0.0790186	0.613148	0.0792022	0.603567	0.0794617	0.614084	0.0793984	0.604534	0.0793661	0.61681	0.0792492	0.617832	0.0798096	0.617554	0.079863	0.606257	0.0797165	0.624931	0.0797561	0.600386	0.0803068	0.623227	0.0801335	0.622579	0.0801523	0.621071	0.0805624
Linear	FALSE	0.634733	0.079291	1.35576	0.144498	7.72917	0.40674	0.51764	0.0710618	0.557843	0.0750633	0.524921	0.0763943	0.590214	0.0777841	0.599875	0.0777172	0.589416	0.0779749	0.606515	0.0779692	0.60217	0.0785979	0.610277	0.0787745	0.600663	0.0790984	0.611194	0.0789844	0.602237	0.0789811	0.614788	0.0788499	0.614429	0.0793907	0.614118	0.0794511	0.603642	0.0793109	0.622483	0.0793513	0.59561	0.0798541	0.620985	0.079756	0.62058	0.0797938	0.618375	0.0801725
Data Range	AA3:AE79	0.620978	0.0793823	1.56652	0.160049	9.62957	0.451068	0.516448	0.0707018	0.556468	0.0746384	0.521569	0.07591	0.589289	0.0773938	0.599186	0.0773878	0.588466	0.0775706	0.6059	0.0776565	0.601239	0.0782066	0.609302	0.0783753	0.599673	0.0787491	0.610211	0.0785953	0.601459	0.0786286	0.614108	0.0785047	0.613268	0.0789885	0.612946	0.0790542	0.602754	0.0789336	0.621653	0.078982	0.593977	0.0794057	0.620225	0.0794123	0.619905	0.0794726	0.617458	0.0798061
Filled Symbols	FALSE	0.631347	0.0795188	1.79613	0.175812	IsoLine	IsoLine	0.51765	0.070377	0.557856	0.0742572	0.524924	0.0754482	0.590237	0.0770638	0.599902	0.077123	0.58944	0.0772292	0.606547	0.0774175	0.602193	0.0778762	0.6103	0.0780369	0.600677	0.0784421	0.611215	0.0782626	0.602262	0.0783372	0.614824	0.0782417	0.614445	0.0786354	0.614133	0.0787043	0.603665	0.0786153	0.622509	0.0786781	0.59562	0.0789982	0.62101	0.0791302	0.620607	0.0792145	0.618395	0.0794931
ConcAge	FALSE	0.64211	0.0795954	2.04629	0.191789			0.521149	0.0701135	0.561893	0.0739506	0.534716	0.0750463	0.592982	0.0768208	0.601967	0.0769441	0.592262	0.0769783	0.608406	0.0772716	0.604954	0.0776337	0.613191	0.0777867	0.603594	0.0782024	0.614124	0.0780131	0.604581	0.0781304	0.616879	0.0780822	0.617862	0.0783601	0.617583	0.0784299	0.606301	0.0783818	0.624982	0.0784642	0.600406	0.0786645	0.623275	0.0789327	0.62263	0.0790406	0.621109	0.0792588
ConcSwap	FALSE	0.642066	0.0796353	2.31882	0.207983			0.52666	0.0699328	0.568254	0.0737434	0.55015	0.0747369	0.5973	0.0766844	0.605212	0.0768658	0.596701	0.0768384	0.611325	0.0772307	0.609298	0.0774985	0.617741	0.0776451	0.608187	0.0780492	0.618702	0.0778672	0.608229	0.078025	0.620106	0.078039	0.623244	0.0781849	0.623016	0.0782531	0.610447	0.078252	0.62887	0.0783576	0.607948	0.0784316	0.626836	0.0788356	0.62581	0.0789649	0.62538	0.0791221
1st Symbol-row	1	0.624956	0.0796615	2.61574	0.224397			0.533738	0.0698495	0.576422	0.0736525	0.569977	0.074545	0.602843	0.0766658	0.609375	0.0768943	0.602398	0.0768208	0.615068	0.077298	0.614873	0.0774817	0.623581	0.0776234	0.614084	0.0779951	0.624579	0.0778367	0.61291	0.0780296	0.624243	0.0781157	0.630155	0.078124	0.629993	0.0781882	0.61577	0.0782363	0.633861	0.078367	0.617633	0.0783184	0.631406	0.0788469	0.629889	0.0789936	0.630863	0.0790942
		0.642463	0.0797892	2.93922	0.241034			0.541809	0.0698704	0.585736	0.0736851	0.59259	0.0744862	0.609161	0.0767663	0.614118	0.0770273	0.608892	0.0769268	0.619331	0.0774682	0.621228	0.0775846	0.630237	0.0777234	0.620808	0.0780445	0.631279	0.0779239	0.618244	0.0781438	0.628957	0.0783061	0.638034	0.0781822	0.637948	0.0782406	0.621836	0.0783361	0.639548	0.0784916	0.628678	0.0783341	0.636614	0.0789657	0.634537	0.0791242	0.637113	0.0791773
		0.634415	0.0799092	3.29164	0.257898			0.55022	0.0699936	0.595441	0.0738387	0.616157	0.0745652	0.615741	0.076978	0.619058	0.0772541	0.615656	0.0771479	0.623769	0.0777273	0.627848	0.0777989	0.637172	0.0779371	0.627813	0.0781932	0.638259	0.0781219	0.623799	0.0783583	0.633864	0.0785947	0.646243	0.078355	0.646237	0.078406	0.628155	0.0785433	0.645471	0.0787213	0.640188	0.0784774	0.642038	0.0791823	0.639377	0.0793463	0.643625	0.0793646
		0.639282	0.0801732	3.67559	0.27499			0.558288	0.0702094	0.604751	0.0741007	0.638769	0.0747756	0.622053	0.0772835	0.623794	0.0775563	0.622143	0.0774662	0.628023	0.0780545	0.634196	0.0781073	0.643822	0.0782471	0.634533	0.0784293	0.644953	0.0784146	0.629127	0.0786558	0.638567	0.0789582	0.654117	0.0786282	0.654187	0.078671	0.634216	0.078841	0.651151	0.0790376	0.65123	0.0787366	0.647238	0.0794791	0.644017	0.0796419	0.649869	0.0796411
		0.63691	0.0802529	4.09389	0.292315			0.565361	0.0705001	0.612912	0.07445	0.658594	0.0751005	0.627582	0.0776583	0.627942	0.0779093	0.627827	0.0778558	0.631748	0.0784232	0.639759	0.0784847	0.649649	0.0786283	0.640422	0.0787337	0.650819	0.0787784	0.633794	0.0790121	0.642685	0.0793671	0.661019	0.0789798	0.661156	0.0790141	0.639525	0.0792053	0.656126	0.0794147	0.66091	0.0790909	0.651794	0.0798322	0.648082	0.079987	0.655342	0.0799842
		0.640335	0.0804643	4.54961	0.309875			0.570865	0.0708423	0.619263	0.0748583	0.674026	0.0755133	0.631883	0.0780718	0.631166	0.0782847	0.632247	0.0782853	0.634642	0.0788035	0.644085	0.0789005	0.654182	0.0790498	0.645005	0.0790817	0.655382	0.0791836	0.637422	0.0793984	0.645885	0.0797883	0.666389	0.0793813	0.666578	0.0794075	0.643655	0.0796065	0.659995	0.0798222	0.668443	0.0795115	0.655337	0.0802129	0.651241	0.0803536	0.659598	0.0803662
		0.634998	0.0805529	5.04611	0.327673			0.574354	0.0712082	0.623289	0.0752925	0.683815	0.0759809	0.634606	0.0784907	0.633205	0.078652	0.635046	0.0787199	0.636471	0.0791647	0.646824	0.0793212	0.657052	0.0794775	0.647909	0.079445	0.658272	0.0795975	0.639719	0.0797834	0.647907	0.0801877	0.669792	0.0798001	0.670014	0.0798194	0.646269	0.0800121	0.662444	0.080227	0.67322	0.0799642	0.657578	0.0805904	0.65324	0.0807121	0.662294	0.0807562
		0.63628	0.0808797	5.58702	0.345714			0.575546	0.0715681	0.624664	0.0757174	0.687167	0.0764651	0.635531	0.0788809	0.633895	0.0789814	0.635997	0.0791242	0.637087	0.0794774	0.647755	0.0797125	0.658027	0.0798767	0.648899	0.0797943	0.659255	0.0799867	0.640497	0.0801359	0.648587	0.0805328	0.670952	0.0802024	0.671187	0.0802164	0.647157	0.0803894	0.663274	0.0805963	0.674852	0.0804126	0.658338	0.0809341	0.653915	0.0810333	0.663211	0.0811225
		0.632765	0.0813087	6.17632	0.364			Black	Black	Black	Black	Black	Black	Black	Black	Black	Black	Black	Black	Black	Black	Black	Black	Black	Black	Black	Black	Black	Black	Black	Black	Black	Black	Black	Black	Black	Black	Black	Black	Black	Black	Black	Black	Black	Black	Black	Black	Black	Black
		0.655962	0.0814831	6.81835	0.382534
		0.648559	0.0815937	7.51782	0.40132
		0.646592	0.0818247	8.27986	0.420361
		0.649141	0.0818504	9.11008	0.439661
		0.651352	0.0820516	10.0146	0.459223
		0.666859	0.0820997	11	0.479051
		0.659929	0.0821133	11	0.479051
		0.65325	0.0827426	IsoLine	IsoLine
		0.670193	0.0832523
		0.661065	0.083267
		0.674151	0.0834993
		0.660261	0.0836722
		0.665788	0.0836957
		0.669409	0.0839051
		0.676609	0.0842756
		0.68067	0.0847649
		0.693544	0.0847958
		0.672259	0.0848629
		0.667503	0.0849394
		0.668437	0.0849901
		0.67734	0.0852138
		0.685085	0.086145
		0.678372	0.086149
		0.692263	0.0869702
		0.697677	0.0874873
		0.727926	0.0884016
		0.707299	0.0888851
		0.71514	0.0891516
		0.712842	0.0893522
		0.719479	0.089977
		0.722435	0.0899899
		0.738074	0.0908893
		0.725247	0.0912692
		0.740525	0.0914657
		0.827621	0.100496
		0.845533	0.10095
		0.826366	0.101357
		0.849474	0.101798
		0.841839	0.101919
		0.867605	0.102531
		0.887726	0.103248
		0.90328	0.104673
		0.946543	0.110921
		0.9395	0.111828
		0.954336	0.112225
		0.967911	0.113318
		1.04888	0.120251
		1.11529	0.125079
		1.30096	0.138855
		1.57309	0.160685
		5.63193	0.34107
		6.59591	0.393205
		8.56624	0.444488
		IsoLine	IsoLine
[truncated: 112 more columns]

## Sheet: PlotDat3
Source sheet	all data	0.545997	0.071135	0.363093	0.05	0.343738	0.0476374	0.575546	0.0715681	0.624664	0.0757174	0.687167	0.0764651	0.635531	0.0788809	0.633895	0.0789814	0.635997	0.0791242	0.637087	0.0794774	0.647755	0.0797125	0.658027	0.0798767	0.648899	0.0797943	0.659255	0.0799867	0.640497	0.0801359	0.648587	0.0805328	0.670952	0.0802024	0.671187	0.0802164	0.647157	0.0803894	0.663274	0.0805963	0.674852	0.0804126	0.658338	0.0809341	0.653915	0.0810333	0.663211	0.0811225
Plot name	Concordia0	0.590566	0.0751779	0.363093	0.05	0.482812	0.0640155	0.574344	0.071893	0.623276	0.0760986	0.683811	0.0769269	0.634583	0.0792109	0.633178	0.0792462	0.635022	0.0794656	0.636439	0.0797164	0.646801	0.0800429	0.657029	0.0802151	0.647895	0.0801013	0.658251	0.0803194	0.639694	0.0804274	0.647871	0.0807958	0.669776	0.0805555	0.669999	0.0805662	0.646247	0.0807077	0.662418	0.0809002	0.673209	0.0808201	0.657553	0.0812162	0.653213	0.0812914	0.662275	0.0814356
Plot Type	1	0.604368	0.0761876	0.400681	0.0545085	0.636279	0.0806498	0.570845	0.0721564	0.619239	0.0764052	0.67402	0.0773288	0.631839	0.079454	0.631114	0.079425	0.6322	0.0797164	0.634581	0.0798622	0.64404	0.0802855	0.654138	0.0804652	0.644978	0.080341	0.655342	0.0805688	0.637374	0.0806342	0.645816	0.0809554	0.666359	0.0808307	0.666549	0.0808407	0.643611	0.0809412	0.659945	0.0811142	0.668423	0.0811538	0.655289	0.0814137	0.65119	0.0814653	0.659561	0.0816699
1st free col	157	0.61241	0.0781374	0.439305	0.0590363	0.805631	0.097544	0.565334	0.0723371	0.612878	0.0766123	0.658585	0.0776382	0.62752	0.0795903	0.627868	0.0795034	0.627761	0.0798564	0.631662	0.0799032	0.639696	0.0804207	0.649588	0.0806069	0.640385	0.0804942	0.650764	0.0807148	0.633727	0.0807395	0.642589	0.0809985	0.660977	0.081006	0.661116	0.0810175	0.639464	0.081071	0.656056	0.0812208	0.660881	0.0813867	0.651727	0.0815108	0.64801	0.081541	0.655289	0.0818066
Sigma Level	2	0.61654	0.0781846	0.478994	0.0635836	0.99251	0.114702	0.558256	0.0724204	0.60471	0.0767033	0.638759	0.0778301	0.621978	0.079609	0.623705	0.0794749	0.622064	0.079874	0.627919	0.0798358	0.634121	0.0804375	0.643749	0.0806286	0.634488	0.0805483	0.644887	0.0807453	0.629046	0.0807349	0.638451	0.0809218	0.654066	0.0810669	0.654139	0.0810823	0.634142	0.0810867	0.651066	0.0812114	0.651196	0.0814999	0.647158	0.0814995	0.643931	0.0815123	0.649806	0.0818345
Absolute Errs	FALSE	0.612231	0.0783474	0.519778	0.0681505	1.19873	0.132129	0.550185	0.0723996	0.595396	0.0766707	0.616146	0.0778889	0.61566	0.0795084	0.618962	0.0793419	0.61557	0.079768	0.623656	0.0796657	0.627766	0.0803345	0.637092	0.0805285	0.627764	0.0804989	0.638187	0.0806581	0.623712	0.0806207	0.633738	0.0807314	0.646187	0.0810087	0.646184	0.0810299	0.628075	0.0809869	0.645379	0.0810867	0.640151	0.0814842	0.64195	0.0813807	0.639283	0.0813817	0.643556	0.0817514
Symbol Type	1	0.621493	0.0785669	0.561686	0.0727369	1.42629	0.149828	0.541774	0.0722763	0.585691	0.0765171	0.592579	0.0778099	0.609079	0.0792968	0.614022	0.0791151	0.608806	0.0795469	0.619218	0.0794066	0.621146	0.0801202	0.630158	0.0803149	0.620759	0.0803502	0.631207	0.0804601	0.618156	0.0804062	0.628831	0.0804428	0.637978	0.0808359	0.637896	0.0808645	0.621756	0.0807797	0.639456	0.080857	0.628641	0.0813409	0.636526	0.0811642	0.634443	0.0811595	0.637045	0.081564
Inverse Plot	FALSE	0.624497	0.0789596	0.60475	0.077343	1.67741	0.167804	0.533706	0.0720605	0.576381	0.0762551	0.569967	0.0775995	0.602768	0.0789912	0.609287	0.0788129	0.602319	0.0792286	0.614964	0.0790794	0.614798	0.0798119	0.623507	0.0800049	0.614039	0.080114	0.624513	0.0801673	0.612829	0.0801088	0.624128	0.0800793	0.630103	0.0805627	0.629945	0.0805995	0.615696	0.080482	0.633776	0.0805408	0.617599	0.0810817	0.631325	0.0808673	0.629803	0.080864	0.6308	0.0812876
Color Plot	TRUE	0.633665	0.079126	0.649002	0.0819689	1.95452	0.186061	0.526633	0.0717698	0.568219	0.0759058	0.550142	0.0772747	0.597238	0.0786165	0.605139	0.0784598	0.596635	0.0788389	0.611238	0.0787107	0.609235	0.0794345	0.61768	0.0796237	0.60815	0.0798097	0.618647	0.0798036	0.608162	0.0797524	0.62001	0.0796704	0.623202	0.080211	0.622976	0.0802564	0.610386	0.0801177	0.6288	0.0801636	0.607919	0.0807274	0.626769	0.0805142	0.625738	0.0805189	0.625328	0.0809445
3D plot	FALSE	0.624286	0.0792717	0.694473	0.0866147	IsoLine	IsoLine	0.521129	0.0714276	0.561869	0.0754975	0.53471	0.0768618	0.592937	0.0782029	0.601914	0.0780845	0.592215	0.0784094	0.608344	0.0783304	0.604909	0.0790186	0.613148	0.0792022	0.603567	0.0794617	0.614084	0.0793984	0.604534	0.0793661	0.61681	0.0792492	0.617832	0.0798096	0.617554	0.079863	0.606257	0.0797165	0.624931	0.0797561	0.600386	0.0803068	0.623227	0.0801335	0.622579	0.0801523	0.621071	0.0805624
Linear	FALSE	0.634733	0.079291	0.741199	0.0912804			0.51764	0.0710618	0.557843	0.0750633	0.524921	0.0763943	0.590214	0.0777841	0.599875	0.0777172	0.589416	0.0779749	0.606515	0.0779692	0.60217	0.0785979	0.610277	0.0787745	0.600663	0.0790984	0.611194	0.0789844	0.602237	0.0789811	0.614788	0.0788499	0.614429	0.0793907	0.614118	0.0794511	0.603642	0.0793109	0.622483	0.0793513	0.59561	0.0798541	0.620985	0.079756	0.62058	0.0797938	0.618375	0.0801725
Data Range	AA3:AE76	0.620978	0.0793823	0.789213	0.0959661			0.516448	0.0707018	0.556468	0.0746384	0.521569	0.07591	0.589289	0.0773938	0.599186	0.0773878	0.588466	0.0775706	0.6059	0.0776565	0.601239	0.0782066	0.609302	0.0783753	0.599673	0.0787491	0.610211	0.0785953	0.601459	0.0786286	0.614108	0.0785047	0.613268	0.0789885	0.612946	0.0790542	0.602754	0.0789336	0.621653	0.078982	0.593977	0.0794057	0.620225	0.0794123	0.619905	0.0794726	0.617458	0.0798061
Filled Symbols	FALSE	0.631347	0.0795188	0.838551	0.100672			0.51765	0.070377	0.557856	0.0742572	0.524924	0.0754482	0.590237	0.0770638	0.599902	0.077123	0.58944	0.0772292	0.606547	0.0774175	0.602193	0.0778762	0.6103	0.0780369	0.600677	0.0784421	0.611215	0.0782626	0.602262	0.0783372	0.614824	0.0782417	0.614445	0.0786354	0.614133	0.0787043	0.603665	0.0786153	0.622509	0.0786781	0.59562	0.0789982	0.62101	0.0791302	0.620607	0.0792145	0.618395	0.0794931
ConcAge	FALSE	0.64211	0.0795954	0.889249	0.105398			0.521149	0.0701135	0.561893	0.0739506	0.534716	0.0750463	0.592982	0.0768208	0.601967	0.0769441	0.592262	0.0769783	0.608406	0.0772716	0.604954	0.0776337	0.613191	0.0777867	0.603594	0.0782024	0.614124	0.0780131	0.604581	0.0781304	0.616879	0.0780822	0.617862	0.0783601	0.617583	0.0784299	0.606301	0.0783818	0.624982	0.0784642	0.600406	0.0786645	0.623275	0.0789327	0.62263	0.0790406	0.621109	0.0792588
ConcSwap	FALSE	0.642066	0.0796353	0.941346	0.110144			0.52666	0.0699328	0.568254	0.0737434	0.55015	0.0747369	0.5973	0.0766844	0.605212	0.0768658	0.596701	0.0768384	0.611325	0.0772307	0.609298	0.0774985	0.617741	0.0776451	0.608187	0.0780492	0.618702	0.0778672	0.608229	0.078025	0.620106	0.078039	0.623244	0.0781849	0.623016	0.0782531	0.610447	0.078252	0.62887	0.0783576	0.607948	0.0784316	0.626836	0.0788356	0.62581	0.0789649	0.62538	0.0791221
1st Symbol-row	1	0.624956	0.0796615	0.994879	0.114911			0.533738	0.0698495	0.576422	0.0736525	0.569977	0.074545	0.602843	0.0766658	0.609375	0.0768943	0.602398	0.0768208	0.615068	0.077298	0.614873	0.0774817	0.623581	0.0776234	0.614084	0.0779951	0.624579	0.0778367	0.61291	0.0780296	0.624243	0.0781157	0.630155	0.078124	0.629993	0.0781882	0.61577	0.0782363	0.633861	0.078367	0.617633	0.0783184	0.631406	0.0788469	0.629889	0.0789936	0.630863	0.0790942
		0.642463	0.0797892	1.04989	0.119698			0.541809	0.0698704	0.585736	0.0736851	0.59259	0.0744862	0.609161	0.0767663	0.614118	0.0770273	0.608892	0.0769268	0.619331	0.0774682	0.621228	0.0775846	0.630237	0.0777234	0.620808	0.0780445	0.631279	0.0779239	0.618244	0.0781438	0.628957	0.0783061	0.638034	0.0781822	0.637948	0.0782406	0.621836	0.0783361	0.639548	0.0784916	0.628678	0.0783341	0.636614	0.0789657	0.634537	0.0791242	0.637113	0.0791773
		0.634415	0.0799092	1.10641	0.124506			0.55022	0.0699936	0.595441	0.0738387	0.616157	0.0745652	0.615741	0.076978	0.619058	0.0772541	0.615656	0.0771479	0.623769	0.0777273	0.627848	0.0777989	0.637172	0.0779371	0.627813	0.0781932	0.638259	0.0781219	0.623799	0.0783583	0.633864	0.0785947	0.646243	0.078355	0.646237	0.078406	0.628155	0.0785433	0.645471	0.0787213	0.640188	0.0784774	0.642038	0.0791823	0.639377	0.0793463	0.643625	0.0793646
		0.639282	0.0801732	1.1645	0.129335			0.558288	0.0702094	0.604751	0.0741007	0.638769	0.0747756	0.622053	0.0772835	0.623794	0.0775563	0.622143	0.0774662	0.628023	0.0780545	0.634196	0.0781073	0.643822	0.0782471	0.634533	0.0784293	0.644953	0.0784146	0.629127	0.0786558	0.638567	0.0789582	0.654117	0.0786282	0.654187	0.078671	0.634216	0.078841	0.651151	0.0790376	0.65123	0.0787366	0.647238	0.0794791	0.644017	0.0796419	0.649869	0.0796411
		0.63691	0.0802529	1.22419	0.134184			0.565361	0.0705001	0.612912	0.07445	0.658594	0.0751005	0.627582	0.0776583	0.627942	0.0779093	0.627827	0.0778558	0.631748	0.0784232	0.639759	0.0784847	0.649649	0.0786283	0.640422	0.0787337	0.650819	0.0787784	0.633794	0.0790121	0.642685	0.0793671	0.661019	0.0789798	0.661156	0.0790141	0.639525	0.0792053	0.656126	0.0794147	0.66091	0.0790909	0.651794	0.0798322	0.648082	0.079987	0.655342	0.0799842
		0.640335	0.0804643	1.28552	0.139054			0.570865	0.0708423	0.619263	0.0748583	0.674026	0.0755133	0.631883	0.0780718	0.631166	0.0782847	0.632247	0.0782853	0.634642	0.0788035	0.644085	0.0789005	0.654182	0.0790498	0.645005	0.0790817	0.655382	0.0791836	0.637422	0.0793984	0.645885	0.0797883	0.666389	0.0793813	0.666578	0.0794075	0.643655	0.0796065	0.659995	0.0798222	0.668443	0.0795115	0.655337	0.0802129	0.651241	0.0803536	0.659598	0.0803662
		0.634998	0.0805529	1.34854	0.143944			0.574354	0.0712082	0.623289	0.0752925	0.683815	0.0759809	0.634606	0.0784907	0.633205	0.078652	0.635046	0.0787199	0.636471	0.0791647	0.646824	0.0793212	0.657052	0.0794775	0.647909	0.079445	0.658272	0.0795975	0.639719	0.0797834	0.647907	0.0801877	0.669792	0.0798001	0.670014	0.0798194	0.646269	0.0800121	0.662444	0.080227	0.67322	0.0799642	0.657578	0.0805904	0.65324	0.0807121	0.662294	0.0807562
		0.63628	0.0808797	1.4133	0.148856			0.575546	0.0715681	0.624664	0.0757174	0.687167	0.0764651	0.635531	0.0788809	0.633895	0.0789814	0.635997	0.0791242	0.637087	0.0794774	0.647755	0.0797125	0.658027	0.0798767	0.648899	0.0797943	0.659255	0.0799867	0.640497	0.0801359	0.648587	0.0805328	0.670952	0.0802024	0.671187	0.0802164	0.647157	0.0803894	0.663274	0.0805963	0.674852	0.0804126	0.658338	0.0809341	0.653915	0.0810333	0.663211	0.0811225
		0.632765	0.0813087	1.47985	0.153789			Black	Black	Black	Black	Black	Black	Black	Black	Black	Black	Black	Black	Black	Black	Black	Black	Black	Black	Black	Black	Black	Black	Black	Black	Black	Black	Black	Black	Black	Black	Black	Black	Black	Black	Black	Black	Black	Black	Black	Black	Black	Black
		0.655962	0.0814831	1.54823	0.158743
		0.648559	0.0815937	1.6185	0.163719
		0.646592	0.0818247	1.69071	0.168716
		0.649141	0.0818504	1.76491	0.173734
		0.651352	0.0820516	1.84115	0.178774
		0.666859	0.0820997	1.91949	0.183835
		0.659929	0.0821133	2	0.188918
		0.65325	0.0827426	2	0.188918
		0.670193	0.0832523	IsoLine	IsoLine
		0.661065	0.083267
		0.674151	0.0834993
		0.660261	0.0836722
		0.665788	0.0836957
		0.669409	0.0839051
		0.676609	0.0842756
		0.68067	0.0847649
		0.693544	0.0847958
		0.672259	0.0848629
		0.667503	0.0849394
		0.668437	0.0849901
		0.67734	0.0852138
		0.685085	0.086145
		0.678372	0.086149
		0.692263	0.0869702
		0.697677	0.0874873
		0.727926	0.0884016
		0.707299	0.0888851
		0.71514	0.0891516
		0.712842	0.0893522
		0.719479	0.089977
		0.722435	0.0899899
		0.738074	0.0908893
		0.725247	0.0912692
		0.740525	0.0914657
		0.827621	0.100496
		0.845533	0.10095
		0.826366	0.101357
		0.849474	0.101798
		0.841839	0.101919
		0.867605	0.102531
		0.887726	0.103248
		0.90328	0.104673
		0.946543	0.110921
		0.9395	0.111828
		0.954336	0.112225
		0.967911	0.113318
		1.04888	0.120251
		1.11529	0.125079
		1.30096	0.138855
		1.57309	0.160685
		IsoLine	IsoLine
[truncated: 106 more columns]

## Sheet: PlotDat4
Source sheet	all data	0.545997	0.071135	0.45	0.0602713	0.482812	0.0640155	0.575546	0.0715681	0.624664	0.0757174	0.687167	0.0764651	0.635531	0.0788809	0.633895	0.0789814	0.635997	0.0791242	0.637087	0.0794774	0.647755	0.0797125	0.658027	0.0798767	0.648899	0.0797943	0.659255	0.0799867	0.640497	0.0801359	0.648587	0.0805328	0.670952	0.0802024	0.671187	0.0802164	0.647157	0.0803894	0.663274	0.0805963	0.674852	0.0804126	0.658338	0.0809341	0.653915	0.0810333	0.663211	0.0811225
Plot name	Concordia0	0.590566	0.0751779	0.452903	0.0606061	0.512308	0.0673218	0.574896	0.0718113	0.623914	0.076003	0.685356	0.0768081	0.635018	0.0791304	0.633505	0.0791832	0.635468	0.0793824	0.636734	0.0796611	0.647238	0.0799624	0.657487	0.0801324	0.648356	0.0800251	0.658711	0.0802378	0.640061	0.0803571	0.648197	0.0807351	0.670316	0.0804678	0.670545	0.0804792	0.646664	0.0806301	0.66281	0.0808271	0.673965	0.0807174	0.657912	0.0811484	0.653534	0.08123	0.662704	0.0813588
Plot Type	1	0.604368	0.0761876	0.462805	0.0617414	0.542391	0.0706383	0.572984	0.072025	0.621707	0.0762526	0.680006	0.077124	0.633516	0.0793366	0.632375	0.0793414	0.633924	0.0795954	0.635716	0.079797	0.645727	0.0801684	0.655905	0.0803442	0.646761	0.0802229	0.65712	0.0804476	0.638791	0.0805356	0.647071	0.0808842	0.668447	0.0806951	0.668658	0.0807052	0.645222	0.0808285	0.661456	0.0810125	0.671348	0.0809868	0.656672	0.08132	0.652426	0.081384	0.661219	0.081556
1st free col	125	0.61241	0.0781374	0.472774	0.0628778	0.573073	0.0739651	0.569892	0.0721997	0.618138	0.0764552	0.67135	0.077399	0.631092	0.0794903	0.630552	0.0794491	0.631432	0.0797538	0.634075	0.0798791	0.643288	0.0803216	0.653351	0.0805027	0.644183	0.0803791	0.65455	0.0806068	0.636743	0.0806638	0.645257	0.0809736	0.665427	0.0808744	0.665609	0.0808845	0.642893	0.0809759	0.659272	0.0811445	0.667118	0.0812092	0.654672	0.0814416	0.65064	0.0814886	0.658822	0.0817055
Sigma Level	2	0.61654	0.0781846	0.482812	0.0640155	0.604365	0.0773023	0.565756	0.072328	0.613365	0.076602	0.659767	0.077621	0.627851	0.0795848	0.628117	0.0795015	0.628101	0.0798508	0.631885	0.0799038	0.640029	0.0804153	0.649937	0.0806011	0.640737	0.0804869	0.651114	0.0807085	0.634006	0.0807359	0.642836	0.0809994	0.661388	0.0809977	0.661532	0.0810091	0.639782	0.0810659	0.656354	0.0812172	0.661459	0.0813748	0.652	0.0815077	0.648254	0.0815392	0.655616	0.0818007
Absolute Errs	FALSE	0.612231	0.0783474	0.492917	0.0651545	0.636279	0.0806498	0.560756	0.0724041	0.607595	0.0766865	0.645763	0.0777804	0.623935	0.0796162	0.625176	0.0794963	0.624076	0.079882	0.629241	0.0798702	0.63609	0.0804453	0.645811	0.080635	0.636571	0.0805417	0.646962	0.0807483	0.630699	0.0807488	0.639912	0.0809605	0.656507	0.0810598	0.656603	0.0810737	0.636022	0.0810944	0.652829	0.0812275	0.654617	0.0814763	0.648771	0.0815154	0.645372	0.0815335	0.651743	0.0818376
Symbol Type	1	0.621493	0.0785669	0.503092	0.0662946	0.668829	0.0840077	0.555111	0.0724247	0.601081	0.0767052	0.629949	0.0778701	0.619516	0.0795828	0.621857	0.0794338	0.619534	0.0798462	0.626258	0.0797795	0.631645	0.0804104	0.641155	0.0806029	0.631868	0.0805409	0.642276	0.0807244	0.626968	0.0807021	0.636614	0.0808586	0.650996	0.0810579	0.65104	0.0810754	0.631778	0.0810604	0.64885	0.081175	0.646892	0.0815093	0.645128	0.0814645	0.64212	0.0814719	0.647371	0.0818144
Inverse Plot	FALSE	0.624497	0.0789596	0.513336	0.067436	0.702025	0.087376	0.549068	0.0723889	0.594108	0.076657	0.613017	0.0778863	0.614786	0.0794864	0.618306	0.0793167	0.614672	0.0797449	0.623066	0.0796359	0.626887	0.0803121	0.636171	0.0805063	0.626834	0.0804847	0.63726	0.0806378	0.622974	0.0805976	0.633086	0.0806982	0.645097	0.080992	0.645084	0.0810142	0.627236	0.0809652	0.644593	0.0810619	0.638623	0.0814723	0.641229	0.0813572	0.638641	0.081357	0.642691	0.0817322
Color Plot	TRUE	0.633665	0.079126	0.523649	0.0685786	0.735883	0.0907549	0.542891	0.0722984	0.586979	0.0765442	0.595707	0.0778283	0.609953	0.0793309	0.614678	0.0791501	0.609704	0.0795825	0.619806	0.0794456	0.622025	0.0801547	0.631078	0.0803494	0.621689	0.0803754	0.632134	0.0804924	0.618894	0.0804401	0.629482	0.0804862	0.639067	0.0808651	0.638996	0.0808927	0.622595	0.080813	0.640242	0.0808931	0.630169	0.0813671	0.637246	0.0811981	0.635086	0.0811939	0.637909	0.0815946
3D plot	FALSE	0.624286	0.0792717	0.534033	0.0697224	0.770413	0.0941442	0.536849	0.072157	0.580008	0.0763717	0.578776	0.0776986	0.605226	0.0791233	0.611131	0.0789414	0.604846	0.0793661	0.61662	0.0792168	0.617271	0.079945	0.626098	0.080139	0.616657	0.0802179	0.627121	0.0802944	0.614904	0.0802363	0.62596	0.0802319	0.633171	0.0806828	0.633042	0.0807163	0.618057	0.0806105	0.635989	0.0806761	0.621901	0.0811981	0.633351	0.0809943	0.63161	0.0809896	0.633233	0.0814076
Linear	FALSE	0.634733	0.079291	0.544488	0.0708674	0.805631	0.097544	0.531207	0.0719709	0.573497	0.0761471	0.562963	0.0775028	0.600814	0.0788726	0.607821	0.0786995	0.600311	0.0791052	0.613647	0.0789597	0.612832	0.0796923	0.621448	0.0798843	0.611958	0.0800191	0.622441	0.0800526	0.61118	0.0799952	0.622673	0.0799465	0.627665	0.0804529	0.627483	0.0804926	0.61382	0.0803666	0.632018	0.0804204	0.614179	0.0809728	0.629715	0.0807545	0.628367	0.0807531	0.628867	0.0811794
Data Range	AA3:AE60	0.620978	0.0793823	0.555014	0.0720136	IsoLine	IsoLine	0.526212	0.0717483	0.567733	0.07588	0.54896	0.0772495	0.596909	0.0785898	0.604892	0.0784352	0.596297	0.0788112	0.611017	0.0786854	0.608904	0.0794076	0.617333	0.0795965	0.607799	0.0797875	0.618298	0.0797776	0.607884	0.0797273	0.619765	0.0796423	0.62279	0.0801855	0.622561	0.0802314	0.61007	0.0800918	0.628504	0.080137	0.607342	0.0807011	0.626498	0.0804894	0.625496	0.0804948	0.625002	0.0809199
Filled Symbols	FALSE	0.631347	0.0795188	0.565612	0.0731611			0.522081	0.0714989	0.562967	0.0755823	0.537379	0.0769499	0.593681	0.0782872	0.602471	0.0781599	0.592979	0.0784969	0.608844	0.0784059	0.605657	0.0791033	0.613931	0.0792881	0.604359	0.0795335	0.614873	0.0794812	0.605161	0.0794443	0.617363	0.0793328	0.61876	0.0798923	0.618492	0.0799442	0.606971	0.0797982	0.6256	0.0798385	0.601689	0.0803947	0.623839	0.0802104	0.623125	0.0802259	0.621807	0.0806405
ConcAge	FALSE	0.64211	0.0795954	0.576282	0.0743098			0.518996	0.0712336	0.559407	0.0752669	0.528725	0.0766169	0.591271	0.077978	0.600666	0.0778856	0.590503	0.0781761	0.607225	0.0781334	0.603233	0.0787927	0.611392	0.0789726	0.601791	0.079268	0.612316	0.0791765	0.603129	0.0791586	0.615572	0.0790314	0.61575	0.0795862	0.615453	0.0796435	0.604657	0.0794986	0.623433	0.0795378	0.597465	0.0800671	0.621855	0.0799298	0.621356	0.0799582	0.619422	0.0803534
ConcSwap	FALSE	0.642066	0.0796353	0.587024	0.0754598			0.51709	0.070964	0.557209	0.0749476	0.523377	0.0762651	0.589786	0.0776759	0.599555	0.0776245	0.588976	0.0778627	0.606229	0.0778799	0.601739	0.0784893	0.609826	0.0786639	0.600206	0.0790027	0.610739	0.0788769	0.601876	0.0788827	0.614471	0.0787513	0.613893	0.0792805	0.613577	0.0793425	0.603231	0.0792062	0.622098	0.0792481	0.594857	0.0797325	0.620633	0.0796598	0.620267	0.0797034	0.617951	0.0800712
1st Symbol-row	1	0.624956	0.0796615	0.59784	0.076611			0.516448	0.0707018	0.556468	0.0746384	0.521569	0.07591	0.589289	0.0773938	0.599186	0.0773878	0.588466	0.0775706	0.6059	0.0776565	0.601239	0.0782066	0.609302	0.0783753	0.599673	0.0787491	0.610211	0.0785953	0.601459	0.0786286	0.614108	0.0785047	0.613268	0.0789885	0.612946	0.0790542	0.602754	0.0789336	0.621653	0.078982	0.593977	0.0794057	0.620225	0.0794123	0.619905	0.0794726	0.617458	0.0798061
		0.642463	0.0797892	0.60873	0.0777634			0.517098	0.0704586	0.557218	0.0743528	0.523379	0.075567	0.589803	0.0771443	0.599575	0.077186	0.588994	0.0773124	0.606252	0.0774728	0.601756	0.0779567	0.609843	0.0781195	0.600216	0.0785183	0.610755	0.0783442	0.601895	0.0784075	0.614497	0.0783025	0.613904	0.0787231	0.613588	0.0787913	0.603248	0.0786929	0.622117	0.0787512	0.594864	0.0791009	0.620651	0.079198	0.620286	0.0792759	0.617966	0.0795698
		0.634415	0.0799092	0.619693	0.078917			0.51901	0.0702449	0.559425	0.0741032	0.528729	0.0752511	0.591305	0.0769382	0.600706	0.0770278	0.590538	0.0770994	0.607271	0.0773369	0.603267	0.0777507	0.611425	0.0779078	0.601811	0.0783205	0.612346	0.0781344	0.603164	0.0782289	0.615624	0.0781534	0.615773	0.0784957	0.615474	0.0785653	0.60469	0.0784945	0.623471	0.0785658	0.597481	0.0788315	0.621891	0.0790264	0.621394	0.0791219	0.61945	0.0793726
		0.639282	0.0801732	0.630732	0.0800719			0.522102	0.0700702	0.562994	0.0739006	0.537385	0.0749761	0.593729	0.0767845	0.602528	0.0769201	0.59303	0.076941	0.608911	0.0772548	0.605706	0.0775975	0.613979	0.0777492	0.604389	0.0781643	0.614916	0.0779752	0.605213	0.0781008	0.617437	0.078064	0.618793	0.0783165	0.618523	0.0783861	0.607018	0.0783471	0.625655	0.0784338	0.601711	0.0786091	0.623891	0.0789049	0.62318	0.0790173	0.621848	0.0792232
		0.63691	0.0802529	0.641846	0.081228			0.526238	0.069942	0.567767	0.0737538	0.548969	0.0747541	0.59697	0.0766899	0.604964	0.0768677	0.596361	0.076844	0.611102	0.07723	0.608966	0.0775039	0.617393	0.0776509	0.607835	0.0780564	0.618352	0.0778734	0.60795	0.0780287	0.619859	0.0780381	0.622832	0.0781931	0.6226	0.0782615	0.61013	0.0782571	0.628573	0.0783611	0.60737	0.0784435	0.626564	0.0788388	0.625566	0.0789667	0.625053	0.0791279
		0.640335	0.0804643	0.653035	0.0823853			0.531238	0.0698659	0.573537	0.0736692	0.562973	0.0745948	0.600885	0.0766586	0.607905	0.0768729	0.600386	0.0768128	0.613746	0.0772637	0.612904	0.0774738	0.621518	0.077617	0.612001	0.0780017	0.622503	0.0778337	0.611257	0.0780157	0.622782	0.078077	0.627714	0.0781311	0.627529	0.0781969	0.61389	0.0782285	0.632098	0.0783508	0.614212	0.078342	0.629792	0.078831	0.628448	0.0789724	0.628927	0.0790911
		0.634998	0.0805529	0.664301	0.0835439			0.536883	0.0698453	0.580051	0.0736506	0.578787	0.074505	0.605305	0.0766919	0.611223	0.0769354	0.604928	0.0768486	0.616729	0.0773543	0.61735	0.0775087	0.626175	0.077649	0.616704	0.0780025	0.62719	0.0778576	0.614988	0.0780625	0.62608	0.0781789	0.633224	0.078133	0.633093	0.0781952	0.618134	0.0782626	0.636077	0.0784034	0.621937	0.078309	0.633435	0.0788819	0.6317	0.079034	0.633299	0.0791143
		0.63628	0.0808797	0.675643	0.0847037			0.542926	0.069881	0.587024	0.0736988	0.595719	0.0744888	0.610034	0.0767884	0.614774	0.0770525	0.60979	0.0769499	0.61992	0.077498	0.622107	0.077607	0.631158	0.0777456	0.621738	0.0780587	0.632206	0.0779442	0.618982	0.0781669	0.629609	0.0783394	0.639124	0.0781989	0.639049	0.0782564	0.622675	0.0783578	0.640334	0.0785165	0.630206	0.078346	0.637334	0.0789892	0.635179	0.0791489	0.637978	0.0791965
		0.632765	0.0813087	0.687063	0.0858648			0.549103	0.0699716	0.594153	0.0738115	0.613028	0.0745468	0.614868	0.0769439	0.618402	0.077219	0.614758	0.0771123	0.62318	0.0776883	0.626969	0.0777645	0.636251	0.0779026	0.626883	0.078168	0.637332	0.0780896	0.623062	0.0783245	0.633213	0.0785514	0.645153	0.0783257	0.645136	0.0783778	0.627317	0.07851	0.644685	0.0786852	0.63866	0.0784512	0.641318	0.0791483	0.638735	0.079312	0.64276	0.0793341
		0.655962	0.0814831	0.698561	0.0870271			0.555145	0.070113	0.601124	0.073984	0.62996	0.0746765	0.619594	0.0771515	0.621949	0.0774278	0.619616	0.0773287	0.626366	0.077917	0.631723	0.0779741	0.641232	0.078113	0.631915	0.0783255	0.642345	0.0782876	0.627052	0.0785283	0.636735	0.0788056	0.65105	0.0785081	0.65109	0.0785543	0.631855	0.0787125	0.648938	0.0789022	0.646928	0.0786202	0.645213	0.0793522	0.64221	0.0795163	0.647437	0.0795211
		0.648559	0.0815937	0.710137	0.0881907			0.560787	0.070299	0.607634	0.0742087	0.645772	0.0748723	0.624006	0.0774022	0.625259	0.0776697	0.624151	0.0775896	0.62934	0.0781742	0.636162	0.0782268	0.645881	0.0783677	0.636614	0.0785243	0.647025	0.0785294	0.630776	0.0787694	0.640022	0.0790911	0.656556	0.078738	0.656649	0.078778	0.636092	0.0789564	0.652909	0.0791579	0.65465	0.0788455	0.648848	0.0795919	0.645454	0.0797528	0.651803	0.0797493
		0.646592	0.0818247	0.721792	0.0893555			0.565782	0.0705216	0.613399	0.0744758	0.659775	0.0751256	0.627912	0.077685	0.628189	0.077934	0.628165	0.0778836	0.63197	0.0784485	0.64009	0.0785116	0.649996	0.0786555	0.640773	0.0787558	0.651168	0.0788044	0.634071	0.0790373	0.64293	0.0793952	0.66143	0.0790054	0.661571	0.0790391	0.639842	0.0792312	0.656423	0.0794413	0.661487	0.0791172	0.652066	0.0798571	0.648324	0.0800111	0.655668	0.0800088
		0.649141	0.0818504	0.733526	0.0905215			0.569913	0.070771	0.618165	0.0747735	0.671357	0.0754252	0.63114	0.0779876	0.630609	0.0782093	0.631483	0.0781979	0.634142	0.078728	0.643337	0.0788159	0.653398	0.0789639	0.644213	0.0790099	0.654593	0.0791008	0.636795	0.0793203	0.645332	0.0797047	0.665461	0.0792985	0.665641	0.0793263	0.642941	0.0795248	0.659327	0.0797398	0.66714	0.0794236	0.654724	0.080136	0.650695	0.08028	0.658862	0.0802882
		0.651352	0.0820516	0.74534	0.0916888			0.572998	0.0710363	0.621725	0.0750889	0.680011	0.0757582	0.633549	0.0782967	0.632414	0.0784835	0.633959	0.0785187	0.635762	0.0790004	0.645761	0.0791265	0.655938	0.0792793	0.646781	0.0792754	0.65715	0.0794054	0.638827	0.079606	0.647123	0.0800061	0.66847	0.0796047	0.66868	0.079627	0.645254	0.0798244	0.661494	0.0800405	0.671364	0.0797513	0.656708	0.0804166	0.652464	0.0805477	0.661247	0.0805753
		0.666859	0.0820997	0.757235	0.0928574			0.574904	0.071306	0.623923	0.0754082	0.685359	0.07611	0.635035	0.0785989	0.633526	0.0787447	0.635486	0.0788321	0.636758	0.0792539	0.647255	0.0794298	0.657503	0.0795881	0.648366	0.0795407	0.658727	0.0797051	0.64008	0.0798819	0.648224	0.0802863	0.670328	0.0799104	0.670556	0.0799281	0.646681	0.0801168	0.662829	0.0803302	0.673972	0.0800858	0.657931	0.0806866	0.653553	0.0808025	0.662718	0.0808575
		0.659929	0.0821133	0.769211	0.0940271			0.575546	0.0715681	0.624664	0.0757174	0.687167	0.0764651	0.635531	0.0788809	0.633895	0.0789814	0.635997	0.0791242	0.637087	0.0794774	0.647755	0.0797125	0.658027	0.0798767	0.648899	0.0797943	0.659255	0.0799867	0.640497	0.0801359	0.648587	0.0805328	0.670952	0.0802024	0.671187	0.0802164	0.647157	0.0803894	0.663274	0.0805963	0.674852	0.0804126	0.658338	0.0809341	0.653915	0.0810333	0.663211	0.0811225
		0.65325	0.0827426	0.781269	0.0951982			Black	Black	Black	Black	Black	Black	Black	Black	Black	Black	Black	Black	Black	Black	Black	Black	Black	Black	Black	Black	Black	Black	Black	Black	Black	Black	Black	Black	Black	Black	Black	Black	Black	Black	Black	Black	Black	Black	Black	Black	Black	Black
		0.670193	0.0832523	0.793408	0.0963705
		0.661065	0.083267	0.805631	0.097544
		0.674151	0.0834993	0.817937	0.0987189
		0.660261	0.0836722	0.830326	0.0998949
		0.665788	0.0836957	0.831439	0.1
		0.669409	0.0839051	IsoLine	IsoLine
		0.676609	0.0842756
		0.68067	0.0847649
		0.693544	0.0847958
		0.672259	0.0848629
		0.667503	0.0849394
		0.668437	0.0849901
		0.67734	0.0852138
		0.685085	0.086145
		0.678372	0.086149
		0.692263	0.0869702
		0.697677	0.0874873
		0.727926	0.0884016
		0.707299	0.0888851
		0.71514	0.0891516
		0.712842	0.0893522
		0.719479	0.089977
		0.722435	0.0899899
		0.738074	0.0908893
		0.725247	0.0912692
		0.740525	0.0914657
		IsoLine	IsoLine
[truncated: 74 more columns]

## Sheet: PlotDat5
Source sheet	all data	0.590566	0.0751779	455		460		465		470		475		480		485		0.56412	0.073	0.565333	0.073	0.557657	0.0723004	0.624664	0.0757174	0.687167	0.0764651	0.633305	0.076035
Plot name	Concordia0	0.604368	0.0761876	0.566513	0.0731324	0.574259	0.0739651	0.582043	0.0747984	0.589866	0.0756324	0.597727	0.076467	0.605627	0.0773023	0.613567	0.0781382	0.56412	0.073	0.565871	0.073058	0.565346	0.0731324	0.624004	0.0759861	0.685575	0.0767873	0.632564	0.0762902
Plot Type	1	IsoLine	IsoLine	0.566491	0.0731518	0.574236	0.0739847	0.58202	0.0748182	0.589842	0.0756524	0.597703	0.0764873	0.605603	0.0773227	0.613542	0.0781589	0.565871	0.0731892	0.567625	0.0732469	0.573073	0.0739651	0.62206	0.0762238	0.680862	0.0770865	0.630375	0.0765199
1st free col	31			0.566424	0.0731704	0.574169	0.0740035	0.581952	0.0748373	0.589773	0.0756717	0.597633	0.0765067	0.605531	0.0773425	0.613469	0.0781788	0.567625	0.0733784	0.569381	0.0734358	0.580838	0.0747984	0.618905	0.0764212	0.67321	0.0773511	0.626821	0.0767154
Sigma Level	2			0.566317	0.0731875	0.574059	0.0740209	0.58184	0.0748548	0.58966	0.0756894	0.597518	0.0765247	0.605415	0.0773606	0.613351	0.0781972	0.569381	0.0735677	0.571138	0.0736247	0.588642	0.0756324	0.614661	0.0765709	0.662912	0.077571	0.62204	0.0768692
Absolute Errs	FALSE			0.566171	0.0732026	0.573912	0.0740361	0.58169	0.0748702	0.589507	0.075705	0.597363	0.0765404	0.605258	0.0773765	0.613191	0.0782133	0.571138	0.0737569	0.572898	0.0738137	0.596484	0.076467	0.609491	0.0766671	0.650364	0.0777378	0.616216	0.0769753
Symbol Type	1			0.565994	0.0732149	0.573732	0.0740485	0.581508	0.0748828	0.589322	0.0757178	0.597175	0.0765534	0.605066	0.0773896	0.612997	0.0782265	0.572898	0.0739463	0.574659	0.0740027	0.604365	0.0773023	0.603594	0.076706	0.636048	0.0778449	0.609571	0.0770296
Inverse Plot	FALSE			0.565793	0.0732241	0.573527	0.0740578	0.581299	0.0748922	0.58911	0.0757273	0.59696	0.076563	0.604848	0.0773993	0.612775	0.0782363	0.574659	0.0741356	0.576423	0.0741917	0.612285	0.0781382	0.597196	0.0766862	0.620516	0.0778884	0.602362	0.0770301
Color Plot	TRUE			0.565574	0.0732297	0.573304	0.0740635	0.581073	0.074898	0.588881	0.0757331	0.596727	0.0765689	0.604611	0.0774053	0.612535	0.0782423	0.576423	0.074325	0.578188	0.0743808	IsoLine	IsoLine	0.590543	0.0766085	0.604362	0.0778665	0.594865	0.0769768
3D plot	FALSE			0.565346	0.0732316	0.573073	0.0740655	0.580838	0.0748999	0.588642	0.0757351	0.596484	0.0765709	0.604365	0.0774073	0.612285	0.0782444	0.578188	0.0745144	0.579956	0.0745699			0.583892	0.0764757	0.588209	0.0777801	0.587369	0.0768716
Linear	FALSE			0.565118	0.0732297	0.572842	0.0740635	0.580603	0.074898	0.588403	0.0757331	0.596242	0.0765689	0.604119	0.0774053	0.612035	0.0782423	0.579956	0.0747039	0.581725	0.074759			0.577496	0.0762931	0.572677	0.0776325	0.580162	0.0767187
Data Range	AA4:AE5			0.564899	0.0732241	0.572619	0.0740578	0.580377	0.0748922	0.588174	0.0757273	0.596008	0.076563	0.603882	0.0773993	0.611794	0.0782363	0.581725	0.0748934	0.583497	0.0749482			0.571603	0.0760676	0.558362	0.0774294	0.57352	0.0765239
Filled Symbols	TRUE			0.564697	0.0732149	0.572414	0.0740485	0.580169	0.0748828	0.587962	0.0757178	0.595793	0.0765534	0.603664	0.0773896	0.611573	0.0782265	0.583497	0.0750829	0.58527	0.0751374			0.566439	0.075808	0.545816	0.0771785	0.567698	0.0762947
ConcAge	TRUE			0.56452	0.0732026	0.572234	0.0740361	0.579986	0.0748702	0.587776	0.075705	0.595605	0.0765404	0.603472	0.0773765	0.611378	0.0782133	0.58527	0.0752725	0.587045	0.0753266			0.562202	0.0755241	0.53552	0.0768896	0.562922	0.0760399
ConcSwap	FALSE			0.564375	0.0731875	0.572087	0.0740209	0.579836	0.0748548	0.587624	0.0756894	0.59545	0.0765247	0.603315	0.0773606	0.611219	0.0781972	0.587045	0.075462	0.588823	0.0755159			0.559055	0.0752269	0.527869	0.0765736	0.559373	0.0757693
1st Symbol-row	1			0.564267	0.0731704	0.571977	0.0740035	0.579725	0.0748373	0.587511	0.0756717	0.595336	0.0765067	0.603199	0.0773425	0.6111	0.0781788	0.588823	0.0756517	0.590602	0.0757052			0.557119	0.0749279	0.523159	0.0762429	0.55719	0.0754933
				0.564201	0.0731518	0.57191	0.0739847	0.579656	0.0748182	0.587441	0.0756524	0.595265	0.0764873	0.603127	0.0773227	0.611028	0.0781589	0.590602	0.0758413	0.592383	0.0758946			0.556468	0.0746384	0.521569	0.07591	0.556454	0.0752226
				0.564178	0.0731324	0.571887	0.0739651	0.579633	0.0747984	0.587418	0.0756324	0.595241	0.076467	0.603103	0.0773023	0.611003	0.0781382	0.592383	0.076031	0.594167	0.0760839			0.557128	0.0743697	0.523161	0.0755878	0.557195	0.0749674
				0.564201	0.0731131	0.57191	0.0739455	0.579656	0.0747786	0.587441	0.0756123	0.595265	0.0764467	0.603127	0.0772818	0.611028	0.0781174	0.594167	0.0762207	0.595952	0.0762733			0.559072	0.074132	0.527874	0.0752886	0.559384	0.0747376
				0.564267	0.0730945	0.571977	0.0739267	0.579725	0.0747596	0.587511	0.0755931	0.595336	0.0764272	0.603199	0.0772621	0.6111	0.0780975	0.595952	0.0764105	0.597739	0.0764628			0.562227	0.0739345	0.535526	0.075024	0.562938	0.0745421
				0.564375	0.0730773	0.572087	0.0739093	0.579836	0.074742	0.587624	0.0755753	0.59545	0.0764093	0.603315	0.0772439	0.611219	0.0780791	0.597739	0.0766003	0.599529	0.0766522			0.566471	0.0737848	0.545824	0.0748041	0.567719	0.0743884
				0.56452	0.0730623	0.572234	0.0738941	0.579986	0.0747266	0.587776	0.0755598	0.595605	0.0763935	0.603472	0.077228	0.611378	0.078063	0.599529	0.0767901	0.60132	0.0768417			0.571641	0.0736887	0.558372	0.0746374	0.573543	0.0742823
				0.564697	0.07305	0.572414	0.0738817	0.580169	0.074714	0.587962	0.075547	0.595793	0.0763806	0.603664	0.0772149	0.611573	0.0780498	0.60132	0.0769799	0.603113	0.0770313			0.577538	0.0736498	0.572687	0.0745302	0.580188	0.074228
				0.564899	0.0730408	0.572619	0.0738724	0.580377	0.0747046	0.588174	0.0755375	0.596008	0.076371	0.603882	0.0772052	0.611794	0.07804	0.603113	0.0771698	0.604909	0.0772208			0.583936	0.0736696	0.58822	0.0744867	0.587397	0.0742275
				0.565118	0.0730351	0.572842	0.0738667	0.580603	0.0746988	0.588403	0.0755317	0.596242	0.0763651	0.604119	0.0771992	0.612035	0.078034	0.604909	0.0773598	0.606706	0.0774104			0.590589	0.0737473	0.604373	0.0745086	0.594894	0.0742808
				0.565346	0.0730332	0.573073	0.0738647	0.580838	0.0746969	0.588642	0.0755297	0.596484	0.0763631	0.604365	0.0771972	0.612285	0.0780319	0.606706	0.0775497	0.608506	0.0776001			0.59724	0.0738801	0.620527	0.074595	0.60239	0.074386
				0.565574	0.0730351	0.573304	0.0738667	0.581073	0.0746988	0.588881	0.0755317	0.596727	0.0763651	0.604611	0.0771992	0.612535	0.078034	0.608506	0.0777397	0.610307	0.0777898			0.603635	0.0740627	0.636059	0.0747426	0.609598	0.0745389
				0.565793	0.0730408	0.573527	0.0738724	0.581299	0.0747046	0.58911	0.0755375	0.59696	0.076371	0.604848	0.0772052	0.612775	0.07804	0.610307	0.0779297	0.61211	0.0779795			0.609528	0.0742881	0.650373	0.0749458	0.61624	0.0747337
				0.565994	0.07305	0.573732	0.0738817	0.581508	0.074714	0.589322	0.075547	0.597175	0.0763806	0.605066	0.0772149	0.612997	0.0780498	0.61211	0.0781198	0.613916	0.0781692			0.614693	0.0745478	0.66292	0.0751966	0.622061	0.0749629
				0.566171	0.0730623	0.573912	0.0738941	0.58169	0.0747266	0.589507	0.0755598	0.597363	0.0763935	0.605258	0.077228	0.613191	0.078063	0.613916	0.0783099	0.615723	0.078359			0.61893	0.0748317	0.673216	0.0754856	0.626837	0.0752177
				0.566317	0.0730773	0.574059	0.0739093	0.58184	0.074742	0.58966	0.0755753	0.597518	0.0764093	0.605415	0.0772439	0.613351	0.0780791	0.615723	0.0785	0.617068	0.0785			0.622077	0.0751289	0.680866	0.0758015	0.630386	0.0754882
				0.566424	0.0730945	0.574169	0.0739267	0.581952	0.0747596	0.589773	0.0755931	0.597633	0.0764272	0.605531	0.0772621	0.613469	0.0780975	0.615723	0.0785	0.614385	0.0785			0.624013	0.0754279	0.685577	0.0761322	0.63257	0.0757642
				0.566491	0.0731131	0.574236	0.0739455	0.58202	0.0747786	0.589842	0.0756123	0.597703	0.0764467	0.605603	0.0772818	0.613542	0.0781174	IsoLine	IsoLine	0.613916	0.0784506			0.624664	0.0757174	0.687167	0.0764651	0.633305	0.076035
				0.566513	0.0731324	0.574259	0.0739651	0.582043	0.0747984	0.589866	0.0756324	0.597727	0.076467	0.605627	0.0773023	0.613567	0.0781382			0.61211	0.0782601			ErrEll	ErrEll	ErrEll	ErrEll	ErrEll	ErrEll
				ConcTikEll	ConcTikEll	ConcTikEll	ConcTikEll	ConcTikEll	ConcTikEll	ConcTikEll	ConcTikEll	ConcTikEll	ConcTikEll	ConcTikEll	ConcTikEll	ConcTikEll	ConcTikEll			0.610307	0.0780697
																				0.608506	0.0778793
																				0.606706	0.077689
																				0.604909	0.0774987
																				0.603113	0.0773084
																				0.60132	0.0771182
																				0.599529	0.076928
																				0.597739	0.0767378
																				0.595952	0.0765476
																				0.594167	0.0763575
																				0.592383	0.0761675
																				0.590602	0.0759774
																				0.588823	0.0757874
																				0.587045	0.0755974
																				0.58527	0.0754075
																				0.583497	0.0752176
																				0.581725	0.0750277
																				0.579956	0.0748379
																				0.578188	0.0746481
																				0.576423	0.0744583
																				0.574659	0.0742686
																				0.572898	0.0740789
																				0.571138	0.0738892
																				0.569381	0.0736995
																				0.567625	0.0735099
																				0.565871	0.0733204
																				0.56412	0.0731308
																				0.562912	0.073
																				0.565333	0.073
																				ConcBand	ConcBand

## Sheet: PlotDat6
Source sheet	all data	0.61241	0.0781374	470		475		480		485		490		495		500		505		510		0.582722	0.075	0.583982	0.075	0.588642	0.0756324	0.635531	0.0788809	0.633895	0.0789814	0.635997	0.0791242	0.637087	0.0794774	0.647755	0.0797125	0.658027	0.0798767	0.648899	0.0797943	0.659255	0.0799867	0.640497	0.0801359	0.648587	0.0805328	0.670952	0.0802024
Plot name	Concordia1	0.61654	0.0781846	0.589866	0.0756324	0.597727	0.076467	0.605627	0.0773023	0.613567	0.0781382	0.621545	0.0789747	0.629563	0.0798119	0.637621	0.0806498	0.645718	0.0814883	0.653855	0.0823274	0.582722	0.075	0.585293	0.0751398	0.596484	0.076467	0.635079	0.079116	0.633552	0.0791718	0.635531	0.0793675	0.636776	0.0796509	0.6473	0.079948	0.657551	0.0801176	0.648421	0.0800115	0.658777	0.0802232	0.640113	0.0803444	0.648244	0.0807239	0.670393	0.0804522
Plot Type	1	0.612231	0.0783474	0.589842	0.0756524	0.597703	0.0764873	0.605603	0.0773227	0.613542	0.0781589	0.62152	0.0789957	0.629538	0.0798331	0.637595	0.0806712	0.645692	0.0815099	0.653829	0.0823493	0.585293	0.0752749	0.587868	0.0754143	0.604365	0.0773023	0.633756	0.0793135	0.632555	0.0793243	0.634171	0.0795716	0.635878	0.0797828	0.645968	0.0801454	0.656157	0.0803205	0.647016	0.0802002	0.657374	0.080424	0.638994	0.0805159	0.647251	0.0808687	0.668746	0.0806692
1st free col	69	0.621493	0.0785669	0.589773	0.0756717	0.597633	0.0765067	0.605531	0.0773425	0.613469	0.0781788	0.621446	0.0790158	0.629462	0.0798535	0.637518	0.0806918	0.645614	0.0815307	0.65375	0.0823703	0.587868	0.0755498	0.590447	0.0756888	0.612285	0.0781382	0.631612	0.0794658	0.630943	0.079433	0.631967	0.0797286	0.634427	0.079868	0.643812	0.0802972	0.653899	0.0804774	0.644737	0.0803533	0.655102	0.0805812	0.637183	0.0806439	0.645647	0.0809616	0.666076	0.0808448
Sigma Level	2	0.624497	0.0789596	0.58966	0.0756894	0.597518	0.0765247	0.605415	0.0773606	0.613351	0.0781972	0.621326	0.0790344	0.62934	0.0798722	0.637395	0.0807108	0.645489	0.0815499	0.653623	0.0823897	0.590447	0.0758248	0.593031	0.0759633	0.620244	0.0789747	0.62873	0.079567	0.628777	0.0794937	0.629005	0.0798326	0.632479	0.0799031	0.640913	0.0803977	0.650863	0.0805824	0.641672	0.0804648	0.652047	0.0806888	0.634749	0.0807233	0.643493	0.080999	0.662485	0.0809725
Absolute Errs	FALSE	0.633665	0.079126	0.589507	0.075705	0.597363	0.0765404	0.605258	0.0773765	0.613191	0.0782133	0.621164	0.0790507	0.629176	0.0798887	0.637228	0.0807274	0.645319	0.0815667	0.653451	0.0824067	0.593031	0.0760999	0.595619	0.076238	0.628242	0.0798119	0.625222	0.0796133	0.626142	0.0795041	0.625398	0.0798794	0.630109	0.0798869	0.637384	0.0804429	0.647166	0.0806315	0.637939	0.0805305	0.648326	0.0807427	0.631785	0.0807512	0.640873	0.0809796	0.658111	0.0810472
Symbol Type	1	0.624286	0.0792717	0.589322	0.0757178	0.597175	0.0765534	0.605066	0.0773896	0.612997	0.0782265	0.620967	0.079064	0.628976	0.0799022	0.637024	0.080741	0.645113	0.0815805	0.653241	0.0824207	0.595619	0.0763751	0.598211	0.0765127	0.636279	0.0806498	0.62122	0.0796029	0.623137	0.0794638	0.621286	0.0798675	0.627408	0.07982	0.633359	0.0804311	0.642951	0.0806227	0.633682	0.0805477	0.644083	0.0807408	0.628407	0.0807265	0.637886	0.080904	0.653122	0.0810661
Inverse Plot	FALSE	0.634733	0.079291	0.58911	0.0757273	0.59696	0.076563	0.604848	0.0773993	0.612775	0.0782363	0.620742	0.0790739	0.628747	0.0799122	0.636793	0.0807512	0.644878	0.0815908	0.653003	0.082431	0.598211	0.0766503	0.600807	0.0767875	0.644357	0.0814883	0.616881	0.0795361	0.619878	0.0793744	0.616825	0.079797	0.624479	0.0797049	0.628994	0.0803627	0.638378	0.0805563	0.629063	0.080516	0.639481	0.0806832	0.624743	0.0806502	0.634648	0.0807752	0.647709	0.0810286
Color Plot	TRUE	0.620978	0.0793823	0.588881	0.0757331	0.596727	0.0765689	0.604611	0.0774053	0.612535	0.0782423	0.620497	0.0790801	0.6285	0.0799184	0.636541	0.0807574	0.644622	0.0815971	0.652743	0.0824374	0.600807	0.0769256	0.603408	0.0770624	0.652474	0.0823274	0.612369	0.0794156	0.616492	0.0792392	0.612188	0.0796709	0.621436	0.0795461	0.624456	0.0802404	0.633624	0.080435	0.624261	0.0804364	0.634697	0.0805721	0.620934	0.0805251	0.631284	0.0805981	0.642082	0.0809359
3D plot	FALSE	0.631347	0.0795188	0.588642	0.0757351	0.596484	0.0765709	0.604365	0.0774073	0.612285	0.0782444	0.620244	0.0790821	0.628242	0.0799205	0.636279	0.0807595	0.644357	0.0815992	0.652474	0.0824396	0.603408	0.077201	0.606012	0.0773373	IsoLine	IsoLine	0.607859	0.079246	0.613107	0.0790635	0.607552	0.0794939	0.618395	0.0793497	0.619919	0.0800689	0.628872	0.0802634	0.61946	0.0803121	0.629913	0.0804118	0.617127	0.0803561	0.627922	0.0803795	0.636456	0.0807918
Linear	FALSE	0.64211	0.0795954	0.588403	0.0757331	0.596242	0.0765689	0.604119	0.0774053	0.612035	0.0782423	0.61999	0.0790801	0.627984	0.0799184	0.636018	0.0807574	0.644091	0.0815971	0.652204	0.0824374	0.606012	0.0774764	0.608621	0.0776123			0.603524	0.0790338	0.609854	0.078854	0.603096	0.0792729	0.615473	0.0791231	0.615558	0.0798548	0.624304	0.0800481	0.614844	0.0801478	0.625315	0.0802084	0.613468	0.0801497	0.624691	0.0801279	0.631047	0.0806016
Data Range	AA6:AE24	0.642066	0.0796353	0.588174	0.0757273	0.596008	0.076563	0.603882	0.0773993	0.611794	0.0782363	0.619746	0.0790739	0.627736	0.0799122	0.635766	0.0807512	0.643836	0.0815908	0.651945	0.082431	0.608621	0.0777519	0.611234	0.0778873			0.599531	0.0787871	0.606858	0.0786188	0.598992	0.0790163	0.612782	0.0788752	0.611541	0.0796062	0.620096	0.0797974	0.610591	0.0799498	0.621079	0.0799697	0.610097	0.0799138	0.621717	0.0798528	0.626063	0.0803728
Filled Symbols	TRUE	0.624956	0.0796615	0.587962	0.0757178	0.595793	0.0765534	0.603664	0.0773896	0.611573	0.0782265	0.619521	0.079064	0.627508	0.0799022	0.635534	0.080741	0.6436	0.0815805	0.651706	0.0824207	0.611234	0.0780275	0.613852	0.0781625			0.596032	0.0785155	0.604234	0.0783669	0.595396	0.078734	0.610427	0.0786155	0.608022	0.0793328	0.616409	0.0795208	0.606865	0.0797257	0.617368	0.079705	0.607145	0.0796575	0.619112	0.0795649	0.621696	0.0801141
ConcAge	TRUE	0.642463	0.0797892	0.587776	0.075705	0.595605	0.0765404	0.603472	0.0773765	0.611378	0.0782133	0.619323	0.0790507	0.627308	0.0798887	0.635331	0.0807274	0.643394	0.0815667	0.651497	0.0824067	0.613852	0.0783032	0.616474	0.0784377			0.593163	0.0782293	0.602083	0.078108	0.592447	0.0784368	0.608496	0.0783539	0.605136	0.0790451	0.613385	0.0792291	0.603808	0.0794842	0.614324	0.0794243	0.604724	0.0793906	0.616978	0.0792753	0.618113	0.0798355
ConcSwap	FALSE	0.634415	0.0799092	0.587624	0.0756894	0.59545	0.0765247	0.603315	0.0773606	0.611219	0.0781972	0.619161	0.0790344	0.627143	0.0798722	0.635164	0.0807108	0.643225	0.0815499	0.651325	0.0823897	0.616474	0.0785789	0.619099	0.078713			0.591033	0.0779396	0.600488	0.077852	0.590258	0.0781362	0.607065	0.0781005	0.602994	0.0787541	0.611141	0.0789334	0.601537	0.0792346	0.612064	0.0791385	0.602928	0.0791233	0.615396	0.078995	0.615453	0.0795477
1st Symbol-row	1	0.639282	0.0801732	0.587511	0.0756717	0.595336	0.0765067	0.603199	0.0773425	0.6111	0.0781788	0.619041	0.0790158	0.627021	0.0798535	0.63504	0.0806918	0.643099	0.0815307	0.651198	0.0823703	0.619099	0.0788547	0.62173	0.0789883			0.589725	0.0776575	0.59951	0.0776089	0.588914	0.0778437	0.606188	0.077865	0.601678	0.0784709	0.609762	0.0786451	0.600142	0.0789863	0.610675	0.0788586	0.601825	0.0788661	0.614426	0.0787348	0.613817	0.0792617
		0.63691	0.0802529	0.587441	0.0756524	0.595265	0.0764873	0.603127	0.0773227	0.611028	0.0781589	0.618967	0.0789957	0.626946	0.0798331	0.634964	0.0806712	0.643022	0.0815099	0.651119	0.0823493	0.62173	0.0791305	0.624364	0.0792637			0.589289	0.0773938	0.599186	0.0773878	0.588466	0.0775706	0.6059	0.0776565	0.601239	0.0782066	0.609302	0.0783753	0.599673	0.0787491	0.610211	0.0785953	0.601459	0.0786286	0.614108	0.0785047	0.613268	0.0789885
		0.640335	0.0804643	0.587418	0.0756324	0.595241	0.076467	0.603103	0.0773023	0.611003	0.0781382	0.618942	0.0789747	0.626921	0.0798119	0.634938	0.0806498	0.642995	0.0814883	0.651092	0.0823274	0.624364	0.0794065	0.627003	0.0795392			0.589741	0.0771588	0.599528	0.0771974	0.588931	0.0773273	0.606211	0.0774829	0.601694	0.0779712	0.609778	0.0781343	0.600151	0.0785319	0.610689	0.0783588	0.601843	0.0784202	0.614451	0.0783137	0.613828	0.0787386
		0.634998	0.0805529	0.587441	0.0756123	0.595265	0.0764467	0.603127	0.0772818	0.611028	0.0781174	0.618967	0.0789538	0.626946	0.0797907	0.634964	0.0806284	0.643022	0.0814666	0.651119	0.0823056	0.627003	0.0796825	0.629646	0.0798148			0.591065	0.0769613	0.600525	0.0770449	0.590291	0.0771232	0.607109	0.0773511	0.603026	0.0777738	0.611172	0.0779315	0.601556	0.0783431	0.612092	0.078158	0.602962	0.0782487	0.615444	0.0781689	0.615475	0.0785217
		IsoLine	IsoLine	0.587511	0.0755931	0.595336	0.0764272	0.603199	0.0772621	0.6111	0.0780975	0.619041	0.0789336	0.627021	0.0797704	0.63504	0.0806078	0.643099	0.0814458	0.651198	0.0822845	0.629646	0.0799585	0.632293	0.0800904			0.593209	0.076809	0.602137	0.0769362	0.592495	0.0769662	0.608559	0.0772659	0.605182	0.0776219	0.61343	0.0777745	0.603835	0.0781901	0.614364	0.0780008	0.604773	0.0781207	0.617048	0.078076	0.618145	0.0783461
				0.587624	0.0755753	0.59545	0.0764093	0.603315	0.0772439	0.611219	0.0780791	0.619161	0.078915	0.627143	0.0797516	0.635164	0.0805888	0.643225	0.0814266	0.651325	0.0822651	0.632293	0.0802347	0.634945	0.0803661			0.59609	0.0767078	0.604303	0.0768755	0.595457	0.0768622	0.610507	0.0772308	0.608081	0.0775214	0.616466	0.0776695	0.6069	0.0780786	0.617419	0.0778932	0.607207	0.0780413	0.619202	0.0780385	0.621736	0.0782184
				0.587776	0.0755598	0.595605	0.0763935	0.603472	0.077228	0.611378	0.078063	0.619323	0.0788988	0.627308	0.0797351	0.635331	0.0805722	0.643394	0.0814098	0.651497	0.0822481	0.634945	0.0805109	0.637601	0.0806419			0.599599	0.0766615	0.606939	0.0768651	0.599064	0.0768153	0.612878	0.077247	0.61161	0.0774763	0.620163	0.0776205	0.610633	0.0780129	0.62114	0.0778393	0.610171	0.0780133	0.621822	0.078058	0.62611	0.0781437
				0.587962	0.075547	0.595793	0.0763806	0.603664	0.0772149	0.611573	0.0780498	0.619521	0.0788854	0.627508	0.0797216	0.635534	0.0805585	0.6436	0.081396	0.651706	0.0822342	0.637601	0.0807872	0.640261	0.0809177			0.6036	0.0766719	0.609944	0.0769053	0.603176	0.0768273	0.615579	0.0773139	0.615635	0.0774881	0.624379	0.0776293	0.61489	0.0779956	0.625382	0.0778412	0.613549	0.078038	0.624809	0.0781335	0.631099	0.0781247
				0.588174	0.0755375	0.596008	0.076371	0.603882	0.0772052	0.611794	0.07804	0.619746	0.0788755	0.627736	0.0797116	0.635766	0.0805484	0.643836	0.0813858	0.651945	0.0822238	0.640261	0.0810635	0.642926	0.0811936			0.60794	0.0767386	0.613202	0.0769948	0.607637	0.0768977	0.618507	0.077429	0.62	0.0775564	0.628951	0.0776956	0.619509	0.0780274	0.629985	0.0778988	0.617213	0.0781144	0.628046	0.0782624	0.636511	0.0781623
				0.588403	0.0755317	0.596242	0.0763651	0.604119	0.0771992	0.612035	0.078034	0.61999	0.0788694	0.627984	0.0797054	0.636018	0.0805421	0.644091	0.0813795	0.652204	0.0822175	0.642926	0.08134	0.645594	0.0814696			0.612451	0.0768591	0.616589	0.07713	0.612274	0.0770239	0.62155	0.0775878	0.624539	0.0776787	0.633705	0.0778169	0.624311	0.078107	0.634769	0.0780099	0.621022	0.0782394	0.631411	0.0784394	0.642139	0.078255
				0.588642	0.0755297	0.596484	0.0763631	0.604365	0.0771972	0.612285	0.0780319	0.620244	0.0788673	0.628242	0.0797033	0.636279	0.08054	0.644357	0.0813773	0.652474	0.0822153	0.645594	0.0816165	0.648268	0.0817457			0.616961	0.0770288	0.619973	0.0773057	0.61691	0.0772008	0.624592	0.0777842	0.629075	0.0778502	0.638457	0.0779885	0.629112	0.0782313	0.639553	0.0781702	0.624829	0.0784084	0.634773	0.078658	0.647765	0.0783991
				0.588881	0.0755317	0.596727	0.0763651	0.604611	0.0771992	0.612535	0.078034	0.620497	0.0788694	0.6285	0.0797054	0.636541	0.0805421	0.644622	0.0813795	0.652743	0.0822175	0.648268	0.081893	0.650945	0.0820218			0.621296	0.077241	0.623226	0.0775152	0.621366	0.0774219	0.627514	0.0780107	0.633436	0.0780644	0.643025	0.0782039	0.633728	0.0783956	0.644151	0.0783736	0.628488	0.0786149	0.638003	0.0789097	0.653174	0.0785893
				0.58911	0.0755375	0.59696	0.076371	0.604848	0.0772052	0.612775	0.07804	0.620742	0.0788755	0.628747	0.0797116	0.636793	0.0805484	0.644878	0.0813858	0.653003	0.0822238	0.650945	0.0821697	0.653627	0.082298			0.62529	0.0774877	0.626222	0.0777504	0.62547	0.0776785	0.630204	0.0782586	0.637453	0.0783129	0.647233	0.0784546	0.637981	0.0785936	0.648387	0.0786123	0.631859	0.0788508	0.640978	0.0791847	0.658158	0.0788181
				0.589322	0.075547	0.597175	0.0763806	0.605066	0.0772149	0.612997	0.0780498	0.620967	0.0788854	0.628976	0.0797216	0.637024	0.0805585	0.645113	0.081396	0.653241	0.0822342	0.653627	0.0824464	0.656313	0.0825742			0.628788	0.0777593	0.628846	0.0780023	0.629066	0.0779608	0.63256	0.0785184	0.640972	0.0785863	0.65092	0.0787312	0.641707	0.0788177	0.652098	0.078877	0.634811	0.0791071	0.643583	0.0794726	0.662525	0.0790767
				0.589507	0.0755598	0.597363	0.0763935	0.605258	0.077228	0.613191	0.078063	0.621164	0.0788988	0.629176	0.0797351	0.637228	0.0805722	0.645319	0.0814098	0.653451	0.0822481	0.656313	0.0827231	0.659004	0.0828506			0.631658	0.0780455	0.630997	0.0782612	0.632015	0.078258	0.634491	0.07878	0.643858	0.0788741	0.653944	0.0790229	0.644764	0.0790592	0.655142	0.0791577	0.637232	0.079374	0.645717	0.0797623	0.666107	0.0793554
				0.58966	0.0755753	0.597518	0.0764093	0.605415	0.0772439	0.613351	0.0780791	0.621326	0.078915	0.62934	0.0797516	0.637395	0.0805888	0.645489	0.0814266	0.653623	0.0822651	0.659004	0.083	0.660461	0.083			0.633787	0.0783352	0.632592	0.0785171	0.634204	0.0785586	0.635922	0.0790334	0.646	0.0791651	0.656188	0.0793186	0.647035	0.0793088	0.657402	0.0794434	0.639028	0.0796412	0.647299	0.0800426	0.668768	0.0796432
				0.589773	0.0755931	0.597633	0.0764272	0.605531	0.0772621	0.613469	0.0780975	0.621446	0.0789336	0.629462	0.0797704	0.637518	0.0806078	0.645614	0.0814458	0.65375	0.0822845	0.659004	0.083	0.657554	0.083			0.635095	0.0786173	0.633571	0.0787603	0.635548	0.0788511	0.636798	0.0792689	0.647316	0.0794482	0.657567	0.0796069	0.64843	0.079557	0.658791	0.0797234	0.64013	0.0798985	0.648268	0.0803028	0.670404	0.0799292
				0.589842	0.0756123	0.597703	0.0764467	0.605603	0.0772818	0.613542	0.0781174	0.62152	0.0789538	0.629538	0.0797907	0.637595	0.0806284	0.645692	0.0814666	0.653829	0.0823056	IsoLine	IsoLine	0.656313	0.0828721			0.635531	0.0788809	0.633895	0.0789814	0.635997	0.0791242	0.637087	0.0794774	0.647755	0.0797125	0.658027	0.0798767	0.648899	0.0797943	0.659255	0.0799867	0.640497	0.0801359	0.648587	0.0805328	0.670952	0.0802024
				0.589866	0.0756324	0.597727	0.076467	0.605627	0.0773023	0.613567	0.0781382	0.621545	0.0789747	0.629563	0.0798119	0.637621	0.0806498	0.645718	0.0814883	0.653855	0.0823274			0.653627	0.0825948			ErrEll	ErrEll	ErrEll	ErrEll	ErrEll	ErrEll	ErrEll	ErrEll	ErrEll	ErrEll	ErrEll	ErrEll	ErrEll	ErrEll	ErrEll	ErrEll	ErrEll	ErrEll	ErrEll	ErrEll	ErrEll	ErrEll
				ConcTikEll	ConcTikEll	ConcTikEll	ConcTikEll	ConcTikEll	ConcTikEll	ConcTikEll	ConcTikEll	ConcTikEll	ConcTikEll	ConcTikEll	ConcTikEll	ConcTikEll	ConcTikEll	ConcTikEll	ConcTikEll	ConcTikEll	ConcTikEll			0.650945	0.0823175
																								0.648268	0.0820404
																								0.645594	0.0817633
																								0.642926	0.0814863
																								0.640261	0.0812093
																								0.637601	0.0809325
																								0.634945	0.0806557
																								0.632293	0.0803789
																								0.629646	0.0801023
																								0.627003	0.0798257
																								0.624364	0.0795492
																								0.62173	0.0792727
																								0.619099	0.0789964
																								0.616474	0.0787201
																								0.613852	0.0784438
																								0.611234	0.0781677
																								0.608621	0.0778916
																								0.606012	0.0776155
																								0.603408	0.0773396
																								0.600807	0.0770637
																								0.598211	0.0767879
																								0.595619	0.0765122
																								0.593031	0.0762365
																								0.590447	0.0759609
																								0.587868	0.0756854
																								0.585293	0.0754099
																								0.582722	0.0751345
																								0.581467	0.075
																								0.583982	0.075
																								ConcBand	ConcBand
[truncated: 18 more columns]

## Sheet: PlotDat8
Source sheet	all data	0.61241	0.0781374	475		480		485		490		495		0.592092	0.076	0.593376	0.076	0.588642	0.0756324	0.635531	0.0788809	0.633895	0.0789814	0.635997	0.0791242	0.637087	0.0794774	0.628678	0.0788336
Plot name	Concordia3	0.61654	0.0781846	0.597727	0.076467	0.605627	0.0773023	0.613567	0.0781382	0.621545	0.0789747	0.629563	0.0798119	0.592092	0.076	0.593547	0.0760182	0.596484	0.076467	0.635079	0.079116	0.633552	0.0791718	0.635531	0.0793675	0.636776	0.0796509	0.628449	0.0789603
Plot Type	1	0.612231	0.0783474	0.597703	0.0764873	0.605603	0.0773227	0.613542	0.0781589	0.62152	0.0789957	0.629538	0.0798331	0.593547	0.0761549	0.595004	0.0761728	0.604365	0.0773023	0.633756	0.0793135	0.632555	0.0793243	0.634171	0.0795716	0.635878	0.0797828	0.627785	0.0790621
1st free col	31	0.621493	0.0785669	0.597633	0.0765067	0.605531	0.0773425	0.613469	0.0781788	0.621446	0.0790158	0.629462	0.0798535	0.595004	0.0763097	0.596462	0.0763274	0.612285	0.0781382	0.631612	0.0794658	0.630943	0.079433	0.631967	0.0797286	0.634427	0.079868	0.62671	0.0791351
Sigma Level	2	IsoLine	IsoLine	0.597518	0.0765247	0.605415	0.0773606	0.613351	0.0781972	0.621326	0.0790344	0.62934	0.0798722	0.596462	0.0764646	0.597921	0.076482	0.620244	0.0789747	0.62873	0.079567	0.628777	0.0794937	0.629005	0.0798326	0.632479	0.0799031	0.625266	0.0791765
Absolute Errs	FALSE			0.597363	0.0765404	0.605258	0.0773765	0.613191	0.0782133	0.621164	0.0790507	0.629176	0.0798887	0.597921	0.0766196	0.599382	0.0766367	0.628242	0.0798119	0.625222	0.0796133	0.626142	0.0795041	0.625398	0.0798794	0.630109	0.0798869	0.623509	0.0791848
Symbol Type	1			0.597175	0.0765534	0.605066	0.0773896	0.612997	0.0782265	0.620967	0.079064	0.628976	0.0799022	0.599382	0.0767745	0.600844	0.0767914	IsoLine	IsoLine	0.62122	0.0796029	0.623137	0.0794638	0.621286	0.0798675	0.627408	0.07982	0.621505	0.0791596
Inverse Plot	FALSE			0.59696	0.076563	0.604848	0.0773993	0.612775	0.0782363	0.620742	0.0790739	0.628747	0.0799122	0.600844	0.0769295	0.602307	0.0769461			0.616881	0.0795361	0.619878	0.0793744	0.616825	0.079797	0.624479	0.0797049	0.619333	0.0791019
Color Plot	TRUE			0.596727	0.0765689	0.604611	0.0774053	0.612535	0.0782423	0.620497	0.0790801	0.6285	0.0799184	0.602307	0.0770845	0.603772	0.0771008			0.612369	0.0794156	0.616492	0.0792392	0.612188	0.0796709	0.621436	0.0795461	0.617075	0.0790139
3D plot	FALSE			0.596484	0.0765709	0.604365	0.0774073	0.612285	0.0782444	0.620244	0.0790821	0.628242	0.0799205	0.603772	0.0772395	0.605238	0.0772556			0.607859	0.079246	0.613107	0.0790635	0.607552	0.0794939	0.618395	0.0793497	0.614818	0.078899
Linear	FALSE			0.596242	0.0765689	0.604119	0.0774053	0.612035	0.0782423	0.61999	0.0790801	0.627984	0.0799184	0.605238	0.0773945	0.606705	0.0774103			0.603524	0.0790338	0.609854	0.078854	0.603096	0.0792729	0.615473	0.0791231	0.612649	0.0787615
Data Range	AA6:AE9			0.596008	0.076563	0.603882	0.0773993	0.611794	0.0782363	0.619746	0.0790739	0.627736	0.0799122	0.606705	0.0775496	0.608174	0.0775651			0.599531	0.0787871	0.606858	0.0786188	0.598992	0.0790163	0.612782	0.0788752	0.610651	0.0786069
Filled Symbols	TRUE			0.595793	0.0765534	0.603664	0.0773896	0.611573	0.0782265	0.619521	0.079064	0.627508	0.0799022	0.608174	0.0777047	0.609644	0.0777199			0.596032	0.0785155	0.604234	0.0783669	0.595396	0.078734	0.610427	0.0786155	0.608902	0.078441
ConcAge	TRUE			0.595605	0.0765404	0.603472	0.0773765	0.611378	0.0782133	0.619323	0.0790507	0.627308	0.0798887	0.609644	0.0778598	0.611115	0.0778748			0.593163	0.0782293	0.602083	0.078108	0.592447	0.0784368	0.608496	0.0783539	0.607467	0.0782702
ConcSwap	FALSE			0.59545	0.0765247	0.603315	0.0773606	0.611219	0.0781972	0.619161	0.0790344	0.627143	0.0798722	0.611115	0.0780149	0.612588	0.0780296			0.591033	0.0779396	0.600488	0.077852	0.590258	0.0781362	0.607065	0.0781005	0.606403	0.0781011
1st Symbol-row	1			0.595336	0.0765067	0.603199	0.0773425	0.6111	0.0781788	0.619041	0.0790158	0.627021	0.0798535	0.612588	0.0781701	0.614062	0.0781845			0.589725	0.0776575	0.59951	0.0776089	0.588914	0.0778437	0.606188	0.077865	0.605751	0.0779401
				0.595265	0.0764873	0.603127	0.0773227	0.611028	0.0781589	0.618967	0.0789957	0.626946	0.0798331	0.614062	0.0783252	0.615537	0.0783394			0.589289	0.0773938	0.599186	0.0773878	0.588466	0.0775706	0.6059	0.0776565	0.605535	0.0777935
				0.595241	0.076467	0.603103	0.0773023	0.611003	0.0781382	0.618942	0.0789747	0.626921	0.0798119	0.615537	0.0784804	0.617014	0.0784944			0.589741	0.0771588	0.599528	0.0771974	0.588931	0.0773273	0.606211	0.0774829	0.605763	0.0776668
				0.595265	0.0764467	0.603127	0.0772818	0.611028	0.0781174	0.618967	0.0789538	0.626946	0.0797907	0.617014	0.0786357	0.618492	0.0786493			0.591065	0.0769613	0.600525	0.0770449	0.590291	0.0771232	0.607109	0.0773511	0.606427	0.0775651
				0.595336	0.0764272	0.603199	0.0772621	0.6111	0.0780975	0.619041	0.0789336	0.627021	0.0797704	0.618492	0.0787909	0.619971	0.0788043			0.593209	0.076809	0.602137	0.0769362	0.592495	0.0769662	0.608559	0.0772659	0.607502	0.077492
				0.59545	0.0764093	0.603315	0.0772439	0.611219	0.0780791	0.619161	0.078915	0.627143	0.0797516	0.619971	0.0789462	0.621452	0.0789593			0.59609	0.0767078	0.604303	0.0768755	0.595457	0.0768622	0.610507	0.0772308	0.608946	0.0774506
				0.595605	0.0763935	0.603472	0.077228	0.611378	0.078063	0.619323	0.0788988	0.627308	0.0797351	0.621452	0.0791014	0.622934	0.0791143			0.599599	0.0766615	0.606939	0.0768651	0.599064	0.0768153	0.612878	0.077247	0.610704	0.0774423
				0.595793	0.0763806	0.603664	0.0772149	0.611573	0.0780498	0.619521	0.0788854	0.627508	0.0797216	0.622934	0.0792567	0.624418	0.0792693			0.6036	0.0766719	0.609944	0.0769053	0.603176	0.0768273	0.615579	0.0773139	0.612707	0.0774675
				0.596008	0.076371	0.603882	0.0772052	0.611794	0.07804	0.619746	0.0788755	0.627736	0.0797116	0.624418	0.0794121	0.625903	0.0794244			0.60794	0.0767386	0.613202	0.0769948	0.607637	0.0768977	0.618507	0.077429	0.61488	0.0775252
				0.596242	0.0763651	0.604119	0.0771992	0.612035	0.078034	0.61999	0.0788694	0.627984	0.0797054	0.625903	0.0795674	0.627389	0.0795795			0.612451	0.0768591	0.616589	0.07713	0.612274	0.0770239	0.62155	0.0775878	0.617138	0.0776132
				0.596484	0.0763631	0.604365	0.0771972	0.612285	0.0780319	0.620244	0.0788673	0.628242	0.0797033	0.627389	0.0797228	0.628876	0.0797346			0.616961	0.0770288	0.619973	0.0773057	0.61691	0.0772008	0.624592	0.0777842	0.619395	0.0777282
				0.596727	0.0763651	0.604611	0.0771992	0.612535	0.078034	0.620497	0.0788694	0.6285	0.0797054	0.628876	0.0798782	0.630365	0.0798897			0.621296	0.077241	0.623226	0.0775152	0.621366	0.0774219	0.627514	0.0780107	0.621563	0.0778656
				0.59696	0.076371	0.604848	0.0772052	0.612775	0.07804	0.620742	0.0788755	0.628747	0.0797116	0.630365	0.0800336	0.631856	0.0800449			0.62529	0.0774877	0.626222	0.0777504	0.62547	0.0776785	0.630204	0.0782586	0.623561	0.0780202
				0.597175	0.0763806	0.605066	0.0772149	0.612997	0.0780498	0.620967	0.0788854	0.628976	0.0797216	0.631856	0.0801891	0.633347	0.0802			0.628788	0.0777593	0.628846	0.0780023	0.629066	0.0779608	0.63256	0.0785184	0.625311	0.0781861
				0.597363	0.0763935	0.605258	0.077228	0.613191	0.078063	0.621164	0.0788988	0.629176	0.0797351	0.633347	0.0803445	0.63484	0.0803552			0.631658	0.0780455	0.630997	0.0782612	0.632015	0.078258	0.634491	0.07878	0.626745	0.0783569
				0.597518	0.0764093	0.605415	0.0772439	0.613351	0.0780791	0.621326	0.078915	0.62934	0.0797516	0.63484	0.0805	0.636234	0.0805			0.633787	0.0783352	0.632592	0.0785171	0.634204	0.0785586	0.635922	0.0790334	0.627809	0.0785261
				0.597633	0.0764272	0.605531	0.0772621	0.613469	0.0780975	0.621446	0.0789336	0.629462	0.0797704	0.63484	0.0805	0.633453	0.0805			0.635095	0.0786173	0.633571	0.0787603	0.635548	0.0788511	0.636798	0.0792689	0.628461	0.078687
				0.597703	0.0764467	0.605603	0.0772818	0.613542	0.0781174	0.62152	0.0789538	0.629538	0.0797907	IsoLine	IsoLine	0.633347	0.080489			0.635531	0.0788809	0.633895	0.0789814	0.635997	0.0791242	0.637087	0.0794774	0.628678	0.0788336
				0.597727	0.076467	0.605627	0.0773023	0.613567	0.0781382	0.621545	0.0789747	0.629563	0.0798119			0.631856	0.0803332			ErrEll	ErrEll	ErrEll	ErrEll	ErrEll	ErrEll	ErrEll	ErrEll	ErrEll	ErrEll
				ConcTikEll	ConcTikEll	ConcTikEll	ConcTikEll	ConcTikEll	ConcTikEll	ConcTikEll	ConcTikEll	ConcTikEll	ConcTikEll			0.630365	0.0801775
																0.628876	0.0800218
																0.627389	0.0798661
																0.625903	0.0797105
																0.624418	0.0795548
																0.622934	0.0793992
																0.621452	0.0792436
																0.619971	0.079088
																0.618492	0.0789325
																0.617014	0.0787769
																0.615537	0.0786214
																0.614062	0.078466
																0.612588	0.0783105
																0.611115	0.0781551
																0.609644	0.0779996
																0.608174	0.0778442
																0.606705	0.0776889
																0.605238	0.0775335
																0.603772	0.0773782
																0.602307	0.0772229
																0.600844	0.0770676
																0.599382	0.0769124
																0.597921	0.0767571
																0.596462	0.0766019
																0.595004	0.0764467
																0.593547	0.0762915
																0.592092	0.0761364
																0.590814	0.076
																0.593376	0.076
																ConcBand	ConcBand

## Sheet: PlotDat9
Source sheet	all data	0.624497	0.0789596	475		480		485		490		495		500		505		510		0.592092	0.076	0.593376	0.076	0.588642	0.0756324	0.647755	0.0797125	0.658027	0.0798767	0.648899	0.0797943	0.659255	0.0799867	0.640497	0.0801359	0.648587	0.0805328	0.670952	0.0802024	0.671187	0.0802164	0.647157	0.0803894	0.663274	0.0805963	0.674852	0.0804126	0.658338	0.0809341
Plot name	Concordia2	0.633665	0.079126	0.597727	0.076467	0.605627	0.0773023	0.613567	0.0781382	0.621545	0.0789747	0.629563	0.0798119	0.637621	0.0806498	0.645718	0.0814883	0.653855	0.0823274	0.592092	0.076	0.594354	0.0761038	0.596484	0.076467	0.6473	0.079948	0.657551	0.0801176	0.648421	0.0800115	0.658777	0.0802232	0.640113	0.0803444	0.648244	0.0807239	0.670393	0.0804522	0.670622	0.0804638	0.646723	0.0806162	0.662865	0.0808139	0.674072	0.0806992	0.657963	0.0811362
Plot Type	1	0.624286	0.0792717	0.597703	0.0764873	0.605603	0.0773227	0.613542	0.0781589	0.62152	0.0789957	0.629538	0.0798331	0.637595	0.0806712	0.645692	0.0815099	0.653829	0.0823493	0.594354	0.0762406	0.596619	0.076344	0.604365	0.0773023	0.645968	0.0801454	0.656157	0.0803205	0.647016	0.0802002	0.657374	0.080424	0.638994	0.0805159	0.647251	0.0808687	0.668746	0.0806692	0.66896	0.0806794	0.645452	0.0808063	0.661672	0.0809921	0.671767	0.0809555	0.65687	0.0813012
1st free col	61	0.634733	0.079291	0.597633	0.0765067	0.605531	0.0773425	0.613469	0.0781788	0.621446	0.0790158	0.629462	0.0798535	0.637518	0.0806918	0.645614	0.0815307	0.65375	0.0823703	0.596619	0.0764813	0.598887	0.0765843	0.612285	0.0781382	0.643812	0.0802972	0.653899	0.0804774	0.644737	0.0803533	0.655102	0.0805812	0.637183	0.0806439	0.645647	0.0809616	0.666076	0.0808448	0.666264	0.0808548	0.643393	0.0809525	0.659741	0.0811241	0.668027	0.0811716	0.655102	0.0814229
Sigma Level	2	0.620978	0.0793823	0.597518	0.0765247	0.605415	0.0773606	0.613351	0.0781972	0.621326	0.0790344	0.62934	0.0798722	0.637395	0.0807108	0.645489	0.0815499	0.653623	0.0823897	0.598887	0.076722	0.601158	0.0768246	0.620244	0.0789747	0.640913	0.0803977	0.650863	0.0805824	0.641672	0.0804648	0.652047	0.0806888	0.634749	0.0807233	0.643493	0.080999	0.662485	0.0809725	0.662639	0.0809834	0.640626	0.081049	0.657146	0.0812048	0.662995	0.0813391	0.652725	0.0814965
Absolute Errs	FALSE	0.631347	0.0795188	0.597363	0.0765404	0.605258	0.0773765	0.613191	0.0782133	0.621164	0.0790507	0.629176	0.0798887	0.637228	0.0807274	0.645319	0.0815667	0.653451	0.0824067	0.601158	0.0769628	0.603433	0.077065	0.628242	0.0798119	0.637384	0.0804429	0.647166	0.0806315	0.637939	0.0805305	0.648326	0.0807427	0.631785	0.0807512	0.640873	0.0809796	0.658111	0.0810472	0.658223	0.0810602	0.637257	0.0810922	0.653987	0.0812311	0.656865	0.0814517	0.649832	0.0815193
Symbol Type	1	0.64211	0.0795954	0.597175	0.0765534	0.605066	0.0773896	0.612997	0.0782265	0.620967	0.079064	0.628976	0.0799022	0.637024	0.080741	0.645113	0.0815805	0.653241	0.0824207	0.603433	0.0772037	0.605711	0.0773055	0.636279	0.0806498	0.633359	0.0804311	0.642951	0.0806227	0.633682	0.0805477	0.644083	0.0807408	0.628407	0.0807265	0.637886	0.080904	0.653122	0.0810661	0.653186	0.0810822	0.633415	0.0810805	0.650384	0.081202	0.649872	0.0815051	0.646533	0.0814904
Inverse Plot	FALSE	0.642066	0.0796353	0.59696	0.076563	0.604848	0.0773993	0.612775	0.0782363	0.620742	0.0790739	0.628747	0.0799122	0.636793	0.0807512	0.644878	0.0815908	0.653003	0.082431	0.605711	0.0774446	0.607992	0.077546	0.644357	0.0814883	0.628994	0.0803627	0.638378	0.0805563	0.629063	0.080516	0.639481	0.0806832	0.624743	0.0806502	0.634648	0.0807752	0.647709	0.0810286	0.647721	0.0810486	0.629247	0.0810142	0.646478	0.0811185	0.642285	0.0814971	0.642956	0.0814109
Color Plot	TRUE	0.624956	0.0796615	0.596727	0.0765689	0.604611	0.0774053	0.612535	0.0782423	0.620497	0.0790801	0.6285	0.0799184	0.636541	0.0807574	0.644622	0.0815971	0.652743	0.0824374	0.607992	0.0776855	0.610276	0.0777865	0.652474	0.0823274	0.624456	0.0802404	0.633624	0.080435	0.624261	0.0804364	0.634697	0.0805721	0.620934	0.0805251	0.631284	0.0805981	0.642082	0.0809359	0.64204	0.0809607	0.624915	0.0808959	0.642417	0.080984	0.634396	0.081428	0.639237	0.0812838
3D plot	FALSE	0.642463	0.0797892	0.596484	0.0765709	0.604365	0.0774073	0.612285	0.0782444	0.620244	0.0790821	0.628242	0.0799205	0.636279	0.0807595	0.644357	0.0815992	0.652474	0.0824396	0.610276	0.0779265	0.612564	0.0780271	IsoLine	IsoLine	0.619919	0.0800689	0.628872	0.0802634	0.61946	0.0803121	0.629913	0.0804118	0.617127	0.0803561	0.627922	0.0803795	0.636456	0.0807918	0.636359	0.0808219	0.620585	0.0807302	0.638358	0.0808036	0.626507	0.0813007	0.63552	0.081114
Linear	FALSE	0.634415	0.0799092	0.596242	0.0765689	0.604119	0.0774053	0.612035	0.0782423	0.61999	0.0790801	0.627984	0.0799184	0.636018	0.0807574	0.644091	0.0815971	0.652204	0.0824374	0.612564	0.0781676	0.614855	0.0782678			0.615558	0.0798548	0.624304	0.0800481	0.614844	0.0801478	0.625315	0.0802084	0.613468	0.0801497	0.624691	0.0801279	0.631047	0.0806016	0.630898	0.0806374	0.616422	0.0805234	0.634457	0.0805842	0.618922	0.0811198	0.631948	0.080908
Data Range	AA10:AE25	0.639282	0.0801732	0.596008	0.076563	0.603882	0.0773993	0.611794	0.0782363	0.619746	0.0790739	0.627736	0.0799122	0.635766	0.0807512	0.643836	0.0815908	0.651945	0.082431	0.614855	0.0784087	0.617149	0.0785085			0.611541	0.0796062	0.620096	0.0797974	0.610591	0.0799498	0.621079	0.0799697	0.610097	0.0799138	0.621717	0.0798528	0.626063	0.0803728	0.625866	0.0804145	0.612588	0.0802835	0.630863	0.0803342	0.611933	0.0808924	0.628658	0.0806739
Filled Symbols	TRUE	0.63691	0.0802529	0.595793	0.0765534	0.603664	0.0773896	0.611573	0.0782265	0.619521	0.079064	0.627508	0.0799022	0.635534	0.080741	0.6436	0.0815805	0.651706	0.0824207	0.617149	0.0786498	0.619446	0.0787493			0.608022	0.0793328	0.616409	0.0795208	0.606865	0.0797257	0.617368	0.079705	0.607145	0.0796575	0.619112	0.0795649	0.621696	0.0801141	0.621456	0.0801616	0.609228	0.0800197	0.627715	0.0800633	0.605807	0.0806272	0.625776	0.0804204
ConcAge	TRUE	0.640335	0.0804643	0.595605	0.0765404	0.603472	0.0773765	0.611378	0.0782133	0.619323	0.0790507	0.627308	0.0798887	0.635331	0.0807274	0.643394	0.0815667	0.651497	0.0824067	0.619446	0.078891	0.621747	0.0789901			0.605136	0.0790451	0.613385	0.0792291	0.603808	0.0794842	0.614324	0.0794243	0.604724	0.0793906	0.616978	0.0792753	0.618113	0.0798355	0.617839	0.0798885	0.606473	0.0797421	0.625134	0.0797819	0.600781	0.0803344	0.623412	0.0801575
ConcSwap	FALSE	0.634998	0.0805529	0.59545	0.0765247	0.603315	0.0773606	0.611219	0.0781972	0.619161	0.0790344	0.627143	0.0798722	0.635164	0.0807108	0.643225	0.0815499	0.651325	0.0823897	0.621747	0.0791323	0.624051	0.079231			0.602994	0.0787541	0.611141	0.0789334	0.601537	0.0792346	0.612064	0.0791385	0.602928	0.0791233	0.615396	0.078995	0.615453	0.0795477	0.615152	0.0796056	0.604429	0.0794614	0.623219	0.0795007	0.597048	0.0800253	0.621659	0.0798952
1st Symbol-row	1	0.63628	0.0808797	0.595336	0.0765067	0.603199	0.0773425	0.6111	0.0781788	0.619041	0.0790158	0.627021	0.0798535	0.63504	0.0806918	0.643099	0.0815307	0.651198	0.0823703	0.624051	0.0793736	0.626358	0.0794719			0.601678	0.0784709	0.609762	0.0786451	0.600142	0.0789863	0.610675	0.0788586	0.601825	0.0788661	0.614426	0.0787348	0.613817	0.0792617	0.6135	0.0793239	0.603173	0.0791884	0.622044	0.0792306	0.59475	0.0797117	0.620583	0.0796436
		IsoLine	IsoLine	0.595265	0.0764873	0.603127	0.0773227	0.611028	0.0781589	0.618967	0.0789957	0.626946	0.0798331	0.634964	0.0806712	0.643022	0.0815099	0.651119	0.0823493	0.626358	0.079615	0.628668	0.0797129			0.601239	0.0782066	0.609302	0.0783753	0.599673	0.0787491	0.610211	0.0785953	0.601459	0.0786286	0.614108	0.0785047	0.613268	0.0789885	0.612946	0.0790542	0.602754	0.0789336	0.621653	0.078982	0.593977	0.0794057	0.620225	0.0794123
				0.595241	0.076467	0.603103	0.0773023	0.611003	0.0781382	0.618942	0.0789747	0.626921	0.0798119	0.634938	0.0806498	0.642995	0.0814883	0.651092	0.0823274	0.628668	0.0798565	0.630982	0.0799539			0.601694	0.0779712	0.609778	0.0781343	0.600151	0.0785319	0.610689	0.0783588	0.601843	0.0784202	0.614451	0.0783137	0.613828	0.0787386	0.61351	0.0788068	0.603189	0.0787068	0.622062	0.0787644	0.594758	0.0791191	0.6206	0.0792103
				0.595265	0.0764467	0.603127	0.0772818	0.611028	0.0781174	0.618967	0.0789538	0.626946	0.0797907	0.634964	0.0806284	0.643022	0.0814666	0.651119	0.0823056	0.630982	0.0800979	0.633299	0.080195			0.603026	0.0777738	0.611172	0.0779315	0.601556	0.0783431	0.612092	0.078158	0.602962	0.0782487	0.615444	0.0781689	0.615475	0.0785217	0.615173	0.0785912	0.60446	0.0785166	0.623255	0.0785862	0.597062	0.0788628	0.621693	0.0790452
				0.595336	0.0764272	0.603199	0.0772621	0.6111	0.0780975	0.619041	0.0789336	0.627021	0.0797704	0.63504	0.0806078	0.643099	0.0814458	0.651198	0.0822845	0.633299	0.0803395	0.635619	0.0804362			0.605182	0.0776219	0.61343	0.0777745	0.603835	0.0781901	0.614364	0.0780008	0.604773	0.0781207	0.617048	0.078076	0.618145	0.0783461	0.617868	0.0784157	0.606518	0.0783705	0.625186	0.0784542	0.600802	0.0786467	0.623462	0.0789235
				0.59545	0.0764093	0.603315	0.0772439	0.611219	0.0780791	0.619161	0.078915	0.627143	0.0797516	0.635164	0.0805888	0.643225	0.0814266	0.651325	0.0822651	0.635619	0.0805811	0.637943	0.0806774			0.608081	0.0775214	0.616466	0.0776695	0.6069	0.0780786	0.617419	0.0778932	0.607207	0.0780413	0.619202	0.0780385	0.621736	0.0782184	0.621494	0.0782872	0.609286	0.078274	0.627781	0.0783735	0.605834	0.0784792	0.625838	0.0788499
				0.595605	0.0763935	0.603472	0.077228	0.611378	0.078063	0.619323	0.0788988	0.627308	0.0797351	0.635331	0.0805722	0.643394	0.0814098	0.651497	0.0822481	0.637943	0.0808227	0.64027	0.0809186			0.61161	0.0774763	0.620163	0.0776205	0.610633	0.0780129	0.62114	0.0778393	0.610171	0.0780133	0.621822	0.078058	0.62611	0.0781437	0.62591	0.0782104	0.612655	0.0782308	0.63094	0.0783472	0.611964	0.0783666	0.628731	0.0788271
				0.595793	0.0763806	0.603664	0.0772149	0.611573	0.0780498	0.619521	0.0788854	0.627508	0.0797216	0.635534	0.0805585	0.6436	0.081396	0.651706	0.0822342	0.64027	0.0810644	0.6426	0.0811599			0.615635	0.0774881	0.624379	0.0776293	0.61489	0.0779956	0.625382	0.0778412	0.613549	0.078038	0.624809	0.0781335	0.631099	0.0781247	0.630947	0.0781884	0.616497	0.0782425	0.634542	0.0783764	0.618957	0.0783132	0.63203	0.078856
				0.596008	0.076371	0.603882	0.0772052	0.611794	0.07804	0.619746	0.0788755	0.627736	0.0797116	0.635766	0.0805484	0.643836	0.0813858	0.651945	0.0822238	0.6426	0.0813062	0.644933	0.0814013			0.62	0.0775564	0.628951	0.0776956	0.619509	0.0780274	0.629985	0.0778988	0.617213	0.0781144	0.628046	0.0782624	0.636511	0.0781623	0.636411	0.078222	0.620664	0.0783088	0.638449	0.0784598	0.626544	0.0783212	0.635607	0.0789356
				0.596242	0.0763651	0.604119	0.0771992	0.612035	0.078034	0.61999	0.0788694	0.627984	0.0797054	0.636018	0.0805421	0.644091	0.0813795	0.652204	0.0822175	0.644933	0.081548	0.64727	0.0816427			0.624539	0.0776787	0.633705	0.0778169	0.624311	0.078107	0.634769	0.0780099	0.621022	0.0782394	0.631411	0.0784394	0.642139	0.078255	0.642093	0.0783098	0.624996	0.0784271	0.64251	0.0785943	0.634433	0.0783903	0.639326	0.0790627
				0.596484	0.0763631	0.604365	0.0771972	0.612285	0.0780319	0.620244	0.0788673	0.628242	0.0797033	0.636279	0.08054	0.644357	0.0813773	0.652474	0.0822153	0.64727	0.0817899	0.64961	0.0818842			0.629075	0.0778502	0.638457	0.0779885	0.629112	0.0782313	0.639553	0.0781702	0.624829	0.0784084	0.634773	0.078658	0.647765	0.0783991	0.647773	0.0784487	0.629327	0.0785928	0.646569	0.0787747	0.642322	0.0785177	0.643043	0.0792325
				0.596727	0.0763651	0.604611	0.0771992	0.612535	0.078034	0.620497	0.0788694	0.6285	0.0797054	0.636541	0.0805421	0.644622	0.0813795	0.652743	0.0822175	0.64961	0.0820318	0.651954	0.0821257			0.633436	0.0780644	0.643025	0.0782039	0.633728	0.0783956	0.644151	0.0783736	0.628488	0.0786149	0.638003	0.0789097	0.653174	0.0785893	0.653234	0.0786331	0.633489	0.0787996	0.65047	0.0789941	0.649907	0.0786985	0.646615	0.0794384
				0.59696	0.076371	0.604848	0.0772052	0.612775	0.07804	0.620742	0.0788755	0.628747	0.0797116	0.636793	0.0805484	0.644878	0.0813858	0.653003	0.0822238	0.651954	0.0822738	0.6543	0.0823673			0.637453	0.0783129	0.647233	0.0784546	0.637981	0.0785936	0.648387	0.0786123	0.631859	0.0788508	0.640978	0.0791847	0.658158	0.0788181	0.658267	0.0788561	0.637324	0.0790395	0.654064	0.0792441	0.656896	0.0789259	0.649906	0.0796726
				0.597175	0.0763806	0.605066	0.0772149	0.612997	0.0780498	0.620967	0.0788854	0.628976	0.0797216	0.637024	0.0805585	0.645113	0.081396	0.653241	0.0822342	0.6543	0.0825158	0.656651	0.0826089			0.640972	0.0785863	0.65092	0.0787312	0.641707	0.0788177	0.652098	0.078877	0.634811	0.0791071	0.643583	0.0794726	0.662525	0.0790767	0.662676	0.0791089	0.640683	0.0793033	0.657211	0.079515	0.663022	0.0791911	0.652788	0.079926
				0.597363	0.0763935	0.605258	0.077228	0.613191	0.078063	0.621164	0.0788988	0.629176	0.0797351	0.637228	0.0805722	0.645319	0.0814098	0.653451	0.0822481	0.656651	0.0827579	0.659004	0.0828506			0.643858	0.0788741	0.653944	0.0790229	0.644764	0.0790592	0.655142	0.0791577	0.637232	0.079374	0.645717	0.0797623	0.666107	0.0793554	0.666294	0.0793821	0.643438	0.0795809	0.659793	0.0797964	0.668048	0.0794839	0.655151	0.0801889
				0.597518	0.0764093	0.605415	0.0772439	0.613351	0.0780791	0.621326	0.078915	0.62934	0.0797516	0.637395	0.0805888	0.645489	0.0814266	0.653623	0.0822651	0.659004	0.083	0.660461	0.083			0.646	0.0791651	0.656188	0.0793186	0.647035	0.0793088	0.657402	0.0794434	0.639028	0.0796412	0.647299	0.0800426	0.668768	0.0796432	0.66898	0.0796649	0.645483	0.0798616	0.661708	0.0800776	0.671781	0.079793	0.656904	0.0804512
				0.597633	0.0764272	0.605531	0.0772621	0.613469	0.0780975	0.621446	0.0789336	0.629462	0.0797704	0.637518	0.0806078	0.645614	0.0814458	0.65375	0.0822845	0.659004	0.083	0.657554	0.083			0.647316	0.0794482	0.657567	0.0796069	0.64843	0.079557	0.658791	0.0797234	0.64013	0.0798985	0.648268	0.0803028	0.670404	0.0799292	0.670632	0.0799466	0.646739	0.0801346	0.662883	0.0803477	0.674079	0.0801066	0.65798	0.0807028
				0.597703	0.0764467	0.605603	0.0772818	0.613542	0.0781174	0.62152	0.0789538	0.629538	0.0797907	0.637595	0.0806284	0.645692	0.0814666	0.653829	0.0823056	IsoLine	IsoLine	0.656651	0.0829068			0.647755	0.0797125	0.658027	0.0798767	0.648899	0.0797943	0.659255	0.0799867	0.640497	0.0801359	0.648587	0.0805328	0.670952	0.0802024	0.671187	0.0802164	0.647157	0.0803894	0.663274	0.0805963	0.674852	0.0804126	0.658338	0.0809341
				0.597727	0.076467	0.605627	0.0773023	0.613567	0.0781382	0.621545	0.0789747	0.629563	0.0798119	0.637621	0.0806498	0.645718	0.0814883	0.653855	0.0823274			0.6543	0.0826643			ErrEll	ErrEll	ErrEll	ErrEll	ErrEll	ErrEll	ErrEll	ErrEll	ErrEll	ErrEll	ErrEll	ErrEll	ErrEll	ErrEll	ErrEll	ErrEll	ErrEll	ErrEll	ErrEll	ErrEll	ErrEll	ErrEll	ErrEll	ErrEll
				ConcTikEll	ConcTikEll	ConcTikEll	ConcTikEll	ConcTikEll	ConcTikEll	ConcTikEll	ConcTikEll	ConcTikEll	ConcTikEll	ConcTikEll	ConcTikEll	ConcTikEll	ConcTikEll	ConcTikEll	ConcTikEll			0.651954	0.0824218
																						0.64961	0.0821794
																						0.64727	0.081937
																						0.644933	0.0816947
																						0.6426	0.0814525
																						0.64027	0.0812102
																						0.637943	0.0809681
																						0.635619	0.080726
																						0.633299	0.0804839
																						0.630982	0.080242
																						0.628668	0.08
																						0.626358	0.0797581
																						0.624051	0.0795163
																						0.621747	0.0792745
																						0.619446	0.0790328
																						0.617149	0.0787911
																						0.614855	0.0785495
																						0.612564	0.078308
																						0.610276	0.0780665
																						0.607992	0.077825
																						0.605711	0.0775836
																						0.603433	0.0773423
																						0.601158	0.077101
																						0.598887	0.0768598
																						0.596619	0.0766186
																						0.594354	0.0763775
																						0.592092	0.0761364
																						0.590814	0.076
																						0.593376	0.076
																						ConcBand	ConcBand
[truncated: 10 more columns]

## Sheet: PlotDat7
Source sheet	all data	0.2	522.651	1	442.99	28.1196	0.85	414.87
Plot name	Average1	77.8	522.651	2	467.276	35.0196	1.15	414.87
Plot Type	15			3	473.326	39.4484	1.15	471.11
1st free col	8			4	484.995	35.0583	0.85	471.11
Sigma Level	2			5	485.278	31.3508	0.85	414.87
Absolute Errs	FALSE			6	486.251	36.4711	ErrBox	ErrBox
Symbol Type	1			7	487.563	31.8519	1.85	432.256
Inverse Plot	FALSE			8	489.91	35.554	2.15	432.256
Color Plot	TRUE			9	490.904	36.1784	2.15	502.295
3D plot	FALSE			10	491.774	30.6533	1.85	502.295
Linear	FALSE			11	491.889	35.0147	1.85	432.256
Data Range	AJ3:AK79			12	492.435	32.9135	ErrBox	ErrBox
Filled Symbols	TRUE			13	493.25	35.662	2.85	433.878
ConcAge	FALSE			14	493.708	35.4641	3.15	433.878
ConcSwap	FALSE			15	493.945	34.8943	3.15	512.775
1st Symbol-row	1			16	494.102	34.5617	2.85	512.775
				17	494.864	34.8268	2.85	433.878
				18	495.58	38.7018	ErrBox	ErrBox
				19	497.157	32.6526	3.85	449.937
				20	497.632	31.3341	4.15	449.937
				21	498.894	33.4253	4.15	520.054
				22	499.422	34.0425	3.85	520.054
				23	501.371	34.5393	3.85	449.937
				24	503.93	34.752	ErrBox	ErrBox
				25	504.969	58.3524	4.85	453.927
				26	505.629	37.8798	5.15	453.927
				27	507.005	45.3096	5.15	516.628
				28	507.158	41.5251	4.85	516.628
				29	508.357	35.994	4.85	453.927
				30	508.643	36.5208	ErrBox	ErrBox
				31	508.724	42.3234	5.85	449.78
				32	512.472	36.0921	6.15	449.78
				33	515.506	37.9187	6.15	522.722
				34	515.594	35.3495	5.85	522.722
				35	516.976	41.2991	5.85	449.78
				36	518.005	35.2552	ErrBox	ErrBox
				37	518.145	39.5927	6.85	455.711
				38	519.39	40.1551	7.15	455.711
				39	521.593	39.2228	7.15	519.415
				40	524.502	40.2154	6.85	519.415
				41	524.685	39.7189	6.85	455.711
				42	525.084	39.0401	ErrBox	ErrBox
				43	525.538	36.0894	7.85	454.356
				44	525.839	35.5582	8.15	454.356
				45	527.169	33.2376	8.15	525.464
				46	532.698	51.9333	7.85	525.464
				47	532.721	33.6473	7.85	454.356
				48	537.593	33.3811	ErrBox	ErrBox
				49	540.659	44.1829	8.85	454.725
				50	546.077	41.906	9.15	454.725
				51	548.94	33.6323	9.15	527.082
				52	550.517	41.2367	8.85	527.082
				53	551.705	54.1731	8.85	454.725
				54	555.401	37.2398	ErrBox	ErrBox
				55	555.477	44.7991	9.85	461.121
				56	560.795	47.2644	10.15	461.121
				57	563.039	41.4834	10.15	522.427
				58	564.2	40.3389	9.85	522.427
				59	617.316	58.2812	9.85	461.121
				60	619.972	51.1566	ErrBox	ErrBox
				61	622.356	45.6839	10.85	456.875
				62	624.935	74.256	11.15	456.875
				63	625.648	51.0339	11.15	526.904
				64	629.226	51.5682	10.85	526.904
				65	633.418	64.6613	10.85	456.875
				66	641.736	64.8442	ErrBox	ErrBox
				67	678.093	64.8906	11.85	459.521
				68	683.355	55.8922	12.15	459.521
				69	685.655	67.7752	12.15	525.348
				70	691.987	61.9365	11.85	525.348
				71	732.007	71.8453	11.85	459.521
				72	759.73	78.6788	ErrBox	ErrBox
				73	838.184	117.672	12.85	457.588
				74	960.583	131.612	13.15	457.588
				75	1891.81	437.989	13.15	528.912
				76	2137.68	471.635	12.85	528.912
				77	2370.7	626.122	12.85	457.588
				IsoLine	IsoLine	IsoLine	ErrBox	ErrBox
							13.85	458.243
							14.15	458.243
							14.15	529.172
							13.85	529.172
							13.85	458.243
							ErrBox	ErrBox
							14.85	459.051
							15.15	459.051
							15.15	528.84
							14.85	528.84
							14.85	459.051
							ErrBox	ErrBox
							15.85	459.54
							16.15	459.54
							16.15	528.664
							15.85	528.664
							15.85	459.54
							ErrBox	ErrBox
							16.85	460.037
							17.15	460.037
							17.15	529.691
							16.85	529.691
							16.85	460.037
							ErrBox	ErrBox
							17.85	456.879
							18.15	456.879
							18.15	534.282
							17.85	534.282
							17.85	456.879
							ErrBox	ErrBox
							18.85	464.504
							19.15	464.504
							19.15	529.809
							18.85	529.809
							18.85	464.504
							ErrBox	ErrBox
							19.85	466.298
							20.15	466.298
							20.15	528.967
							19.85	528.967
							19.85	466.298
							ErrBox	ErrBox
							20.85	465.468
							21.15	465.468
							21.15	532.319
							20.85	532.319
							20.85	465.468
							ErrBox	ErrBox
							21.85	465.38
							22.15	465.38
							22.15	533.465
							21.85	533.465
							21.85	465.38
							ErrBox	ErrBox
							22.85	466.832
							23.15	466.832
							23.15	535.911
							22.85	535.911
							22.85	466.832
							ErrBox	ErrBox
							23.85	469.177
							24.15	469.177
							24.15	538.682
							23.85	538.682
							23.85	469.177
							ErrBox	ErrBox
							24.85	446.617
							25.15	446.617
							25.15	563.322
							24.85	563.322
							24.85	446.617
							ErrBox	ErrBox
							25.85	467.749
							26.15	467.749
							26.15	543.508
							25.85	543.508
							25.85	467.749
							ErrBox	ErrBox
							26.85	461.696
							27.15	461.696
							27.15	552.315
							26.85	552.315
							26.85	461.696
							ErrBox	ErrBox
							27.85	465.633
							28.15	465.633
							28.15	548.683
							27.85	548.683
							27.85	465.633
							ErrBox	ErrBox
							28.85	472.363
							29.15	472.363
							29.15	544.351
							28.85	544.351
							28.85	472.363
							ErrBox	ErrBox
							29.85	472.122
							30.15	472.122
							30.15	545.164
							29.85	545.164
							29.85	472.122
							ErrBox	ErrBox
							30.85	466.401
							31.15	466.401
							31.15	551.048
							30.85	551.048
							30.85	466.401
							ErrBox	ErrBox
							31.85	476.38
							32.15	476.38
							32.15	548.564
							31.85	548.564
							31.85	476.38
							ErrBox	ErrBox
							32.85	477.587
							33.15	477.587
							33.15	553.425
							32.85	553.425
							32.85	477.587
							ErrBox	ErrBox
							33.85	480.244
							34.15	480.244
							34.15	550.943
							33.85	550.943
							33.85	480.244
							ErrBox	ErrBox
							34.85	475.677
							35.15	475.677
							35.15	558.275
							34.85	558.275
							34.85	475.677
							ErrBox	ErrBox
							35.85	482.749
							36.15	482.749
							36.15	553.26
							35.85	553.26
							35.85	482.749
							ErrBox	ErrBox
							36.85	478.552
							37.15	478.552
							37.15	557.737
							36.85	557.737
							36.85	478.552
							ErrBox	ErrBox
							37.85	479.235
							38.15	479.235
							38.15	559.545
							37.85	559.545
							37.85	479.235
							ErrBox	ErrBox
							38.85	482.37
							39.15	482.37
							39.15	560.816
							38.85	560.816
							38.85	482.37
							ErrBox	ErrBox
							39.85	484.286
							40.15	484.286
							40.15	564.717
							39.85	564.717
							39.85	484.286
							ErrBox	ErrBox
							40.85	484.966
							41.15	484.966
							41.15	564.404
							40.85	564.404
							40.85	484.966
							ErrBox	ErrBox
							41.85	486.044
							42.15	486.044
							42.15	564.124
							41.85	564.124
							41.85	486.044
							ErrBox	ErrBox
							42.85	489.449
							43.15	489.449
							43.15	561.627
							42.85	561.627
							42.85	489.449
							ErrBox	ErrBox
							43.85	490.281
							44.15	490.281
							44.15	561.397
							43.85	561.397
							43.85	490.281
							ErrBox	ErrBox
							44.85	493.931
							45.15	493.931
							45.15	560.406
							44.85	560.406
							44.85	493.931
							ErrBox	ErrBox
							45.85	480.764
							46.15	480.764
							46.15	584.631
							45.85	584.631
							45.85	480.764
							ErrBox	ErrBox
							46.85	499.074
							47.15	499.074
							47.15	566.369
							46.85	566.369
							46.85	499.074
							ErrBox	ErrBox
							47.85	504.212
							48.15	504.212
							48.15	570.974
							47.85	570.974
							47.85	504.212
							ErrBox	ErrBox
							48.85	496.476
							49.15	496.476
							49.15	584.842
							48.85	584.842
							48.85	496.476
							ErrBox	ErrBox
							49.85	504.171
							50.15	504.171
							50.15	587.983
							49.85	587.983
							49.85	504.171
							ErrBox	ErrBox
							50.85	515.308
							51.15	515.308
							51.15	582.572
							50.85	582.572
							50.85	515.308
							ErrBox	ErrBox
							51.85	509.281
							52.15	509.281
							52.15	591.754
							51.85	591.754
							51.85	509.281
							ErrBox	ErrBox
							52.85	497.531
							53.15	497.531
							53.15	605.878
							52.85	605.878
							52.85	497.531
							ErrBox	ErrBox
							53.85	518.161
							54.15	518.161
							54.15	592.641
							53.85	592.641
							53.85	518.161
							ErrBox	ErrBox
							54.85	510.678
							55.15	510.678
							55.15	600.276
							54.85	600.276
							54.85	510.678
							ErrBox	ErrBox
							55.85	513.53
							56.15	513.53
							56.15	608.059
							55.85	608.059
							55.85	513.53
							ErrBox	ErrBox
							56.85	521.555
							57.15	521.555
							57.15	604.522
							56.85	604.522
							56.85	521.555
							ErrBox	ErrBox
							57.85	523.861
							58.15	523.861
							58.15	604.539
							57.85	604.539
							57.85	523.861
							ErrBox	ErrBox
							58.85	559.035
							59.15	559.035
							59.15	675.597
							58.85	675.597
							58.85	559.035
							ErrBox	ErrBox
							59.85	568.815
							60.15	568.815
							60.15	671.129
							59.85	671.129
							59.85	568.815
							ErrBox	ErrBox
							60.85	576.672
							61.15	576.672
							61.15	668.04
							60.85	668.04
							60.85	576.672
							ErrBox	ErrBox
							61.85	550.679
							62.15	550.679
							62.15	699.191
							61.85	699.191
							61.85	550.679
							ErrBox	ErrBox
							62.85	574.614
							63.15	574.614
							63.15	676.682
							62.85	676.682
							62.85	574.614
							ErrBox	ErrBox
							63.85	577.658
							64.15	577.658
							64.15	680.795
							63.85	680.795
							63.85	577.658
							ErrBox	ErrBox
							64.85	568.757
							65.15	568.757
							65.15	698.079
							64.85	698.079
							64.85	568.757
							ErrBox	ErrBox
							65.85	576.891
							66.15	576.891
							66.15	706.58
							65.85	706.58
							65.85	576.891
							ErrBox	ErrBox
							66.85	613.202
							67.15	613.202
							67.15	742.984
							66.85	742.984
							66.85	613.202
							ErrBox	ErrBox
							67.85	627.463
							68.15	627.463
							68.15	739.247
							67.85	739.247
							67.85	627.463
							ErrBox	ErrBox
							68.85	617.88
							69.15	617.88
							69.15	753.43
							68.85	753.43
							68.85	617.88
							ErrBox	ErrBox
							69.85	630.05
							70.15	630.05
							70.15	753.923
							69.85	753.923
							69.85	630.05
							ErrBox	ErrBox
							70.85	660.162
							71.15	660.162
							71.15	803.852
							70.85	803.852
							70.85	660.162
							ErrBox	ErrBox
							71.85	681.051
							72.15	681.051
							72.15	838.409
							71.85	838.409
							71.85	681.051
							ErrBox	ErrBox
							72.85	720.512
							73.15	720.512
							73.15	955.856
							72.85	955.856
							72.85	720.512
							ErrBox	ErrBox
							73.85	828.971
							74.15	828.971
							74.15	1092.2
							73.85	1092.2
							73.85	828.971
							ErrBox	ErrBox
							74.85	1453.82
							75.15	1453.82
							75.15	2329.8
							74.85	2329.8
							74.85	1453.82
							ErrBox	ErrBox
							75.85	1666.04
							76.15	1666.04
							76.15	2609.31
							75.85	2609.31
							75.85	1666.04
							ErrBox	ErrBox
							76.85	1744.58
							77.15	1744.58
							77.15	2996.82
							76.85	2996.82
							76.85	1744.58
							ErrBox	ErrBox

[truncated: 9 more sheets: PlotDat10, PlotDat12, PlotDat16, PlotDat14, PlotDat11, PlotDat15, PlotDat17, PlotDat18, data table]
