# Supplementary material for: A tectonic carpet of Variscan flysch at the base of a rootless accretionary prism in northwestern Iberia: U–Pb zircon age constrains from sediments and volcanic olistoliths
Source: Copernicus journal article supplement (doi:10.5194/se-12-835-2021), 2021-04-15
Supplement: Supplementary file 5 [file se-12-835-2021-supplement.zip › SUPP TABLES/Supplementary Table 3_GIMZR01.xls]

## Sheet: PlotDat1
Source sheet	all data	0.2	1.21828	1	1.11973	0.000363325	0.85	1.11937
Plot name	Average0	64.8	1.21828	2	1.13962	0.000971371	1.15	1.11937
Plot Type	15			3	1.14697	0.00120186	1.15	1.1201
1st free col	8			4	1.16662	0.00141026	0.85	1.1201
Sigma Level	2			5	1.17082	0.000364088	0.85	1.11937
Absolute Errs	FALSE			6	1.17552	0.00126885	ErrBox	ErrBox
Symbol Type	1			7	1.17791	0.00168644	1.85	1.13865
Inverse Plot	FALSE			8	1.18307	0.000877553	2.15	1.13865
Color Plot	TRUE			9	1.19377	0.00126688	2.15	1.14059
3D plot	FALSE			10	1.19503	0.000741735	1.85	1.14059
Linear	FALSE			11	1.19932	0.000968121	1.85	1.13865
Data Range	K13:L76			12	1.20011	0.000847188	ErrBox	ErrBox
Filled Symbols	TRUE			13	1.20048	0.000525388	2.85	1.14577
ConcAge	FALSE			14	1.20316	0.000334064	3.15	1.14577
ConcSwap	FALSE			15	1.20331	0.00133786	3.15	1.14818
1st Symbol-row	1			16	1.20451	0.00148838	2.85	1.14818
				17	1.20472	0.000985953	2.85	1.14577
				18	1.20799	0.000636908	ErrBox	ErrBox
				19	1.21129	0.000494955	3.85	1.16521
				20	1.21434	0.000925416	4.15	1.16521
				21	1.21456	0.00085116	4.15	1.16803
				22	1.21468	0.000758604	3.85	1.16803
				23	1.21687	0.000857058	3.85	1.16521
				24	1.21818	0.000690172	ErrBox	ErrBox
				25	1.22051	0.00188496	4.85	1.17045
				26	1.22136	0.00054137	5.15	1.17045
				27	1.22189	0.0015842	5.15	1.17118
				28	1.22242	0.000722994	4.85	1.17118
				29	1.22445	0.00140272	4.85	1.17045
				30	1.22547	0.000912886	ErrBox	ErrBox
				31	1.22602	0.000958307	5.85	1.17425
				32	1.22625	0.00173567	6.15	1.17425
				33	1.23033	0.00372194	6.15	1.17679
				34	1.23266	0.000842854	5.85	1.17679
				35	1.23397	0.00117361	5.85	1.17425
				36	1.23672	0.00100021	ErrBox	ErrBox
				37	1.23989	0.000737863	6.85	1.17623
				38	1.2441	0.000875222	7.15	1.17623
				39	1.24684	0.00123381	7.15	1.1796
				40	1.24954	0.00211764	6.85	1.1796
				41	1.24964	0.00049031	6.85	1.17623
				42	1.2497	0.0035913	ErrBox	ErrBox
				43	1.25281	0.00147444	7.85	1.1822
				44	1.25353	0.00074281	8.15	1.1822
				45	1.25645	0.00105156	8.15	1.18395
				46	1.25893	0.0005168	7.85	1.18395
				47	1.26019	0.00117987	7.85	1.1822
				48	1.26154	0.00140378	ErrBox	ErrBox
				49	1.26355	0.00185566	8.85	1.19251
				50	1.26535	0.00141729	9.15	1.19251
				51	1.26701	0.000611497	9.15	1.19504
				52	1.26913	0.000883116	8.85	1.19504
				53	1.27371	0.000824175	8.85	1.19251
				54	1.27372	0.00159732	ErrBox	ErrBox
				55	1.27563	0.000895938	9.85	1.19429
				56	1.28041	0.00113362	10.15	1.19429
				57	1.2831	0.000782113	10.15	1.19577
				58	1.31072	0.00333599	9.85	1.19577
				59	1.32874	0.00102994	9.85	1.19429
				60	1.35531	0.000737749	ErrBox	ErrBox
				61	1.35747	0.00122827	10.85	1.19835
				62	1.36653	0.00142866	11.15	1.19835
				63	1.37259	0.00570703	11.15	1.20029
				64	1.37413	0.00341867	10.85	1.20029
				IsoLine	IsoLine	IsoLine	10.85	1.19835
							ErrBox	ErrBox
							11.85	1.19926
							12.15	1.19926
							12.15	1.20096
							11.85	1.20096
							11.85	1.19926
							ErrBox	ErrBox
							12.85	1.19995
							13.15	1.19995
							13.15	1.201
							12.85	1.201
							12.85	1.19995
							ErrBox	ErrBox
							13.85	1.20282
							14.15	1.20282
							14.15	1.20349
							13.85	1.20349
							13.85	1.20282
							ErrBox	ErrBox
							14.85	1.20197
							15.15	1.20197
							15.15	1.20465
							14.85	1.20465
							14.85	1.20197
							ErrBox	ErrBox
							15.85	1.20303
							16.15	1.20303
							16.15	1.206
							15.85	1.206
							15.85	1.20303
							ErrBox	ErrBox
							16.85	1.20373
							17.15	1.20373
							17.15	1.2057
							16.85	1.2057
							16.85	1.20373
							ErrBox	ErrBox
							17.85	1.20735
							18.15	1.20735
							18.15	1.20863
							17.85	1.20863
							17.85	1.20735
							ErrBox	ErrBox
							18.85	1.21079
							19.15	1.21079
							19.15	1.21178
							18.85	1.21178
							18.85	1.21079
							ErrBox	ErrBox
							19.85	1.21342
							20.15	1.21342
							20.15	1.21527
							19.85	1.21527
							19.85	1.21342
							ErrBox	ErrBox
							20.85	1.21371
							21.15	1.21371
							21.15	1.21542
							20.85	1.21542
							20.85	1.21371
							ErrBox	ErrBox
							21.85	1.21392
							22.15	1.21392
							22.15	1.21544
							21.85	1.21544
							21.85	1.21392
							ErrBox	ErrBox
							22.85	1.21602
							23.15	1.21602
							23.15	1.21773
							22.85	1.21773
							22.85	1.21602
							ErrBox	ErrBox
							23.85	1.21749
							24.15	1.21749
							24.15	1.21887
							23.85	1.21887
							23.85	1.21749
							ErrBox	ErrBox
							24.85	1.21863
							25.15	1.21863
							25.15	1.2224
							24.85	1.2224
							24.85	1.21863
							ErrBox	ErrBox
							25.85	1.22082
							26.15	1.22082
							26.15	1.2219
							25.85	1.2219
							25.85	1.22082
							ErrBox	ErrBox
							26.85	1.2203
							27.15	1.2203
							27.15	1.22347
							26.85	1.22347
							26.85	1.2203
							ErrBox	ErrBox
							27.85	1.2217
							28.15	1.2217
							28.15	1.22314
							27.85	1.22314
							27.85	1.2217
							ErrBox	ErrBox
							28.85	1.22304
							29.15	1.22304
							29.15	1.22585
							28.85	1.22585
							28.85	1.22304
							ErrBox	ErrBox
							29.85	1.22456
							30.15	1.22456
							30.15	1.22638
							29.85	1.22638
							29.85	1.22456
							ErrBox	ErrBox
							30.85	1.22506
							31.15	1.22506
							31.15	1.22698
							30.85	1.22698
							30.85	1.22506
							ErrBox	ErrBox
							31.85	1.22452
							32.15	1.22452
							32.15	1.22799
							31.85	1.22799
							31.85	1.22452
							ErrBox	ErrBox
							32.85	1.22661
							33.15	1.22661
							33.15	1.23406
							32.85	1.23406
							32.85	1.22661
							ErrBox	ErrBox
							33.85	1.23182
							34.15	1.23182
							34.15	1.23351
							33.85	1.23351
							33.85	1.23182
							ErrBox	ErrBox
							34.85	1.2328
							35.15	1.2328
							35.15	1.23514
							34.85	1.23514
							34.85	1.2328
							ErrBox	ErrBox
							35.85	1.23572
							36.15	1.23572
							36.15	1.23772
							35.85	1.23772
							35.85	1.23572
							ErrBox	ErrBox
							36.85	1.23916
							37.15	1.23916
							37.15	1.24063
							36.85	1.24063
							36.85	1.23916
							ErrBox	ErrBox
							37.85	1.24322
							38.15	1.24322
							38.15	1.24497
							37.85	1.24497
							37.85	1.24322
							ErrBox	ErrBox
							38.85	1.2456
							39.15	1.2456
							39.15	1.24807
							38.85	1.24807
							38.85	1.2456
							ErrBox	ErrBox
							39.85	1.24742
							40.15	1.24742
							40.15	1.25166
							39.85	1.25166
							39.85	1.24742
							ErrBox	ErrBox
							40.85	1.24915
							41.15	1.24915
							41.15	1.25013
							40.85	1.25013
							40.85	1.24915
							ErrBox	ErrBox
							41.85	1.24611
							42.15	1.24611
							42.15	1.25329
							41.85	1.25329
							41.85	1.24611
							ErrBox	ErrBox
							42.85	1.25133
							43.15	1.25133
							43.15	1.25428
							42.85	1.25428
							42.85	1.25133
							ErrBox	ErrBox
							43.85	1.25279
							44.15	1.25279
							44.15	1.25428
							43.85	1.25428
							43.85	1.25279
							ErrBox	ErrBox
							44.85	1.2554
							45.15	1.2554
							45.15	1.25751
							44.85	1.25751
							44.85	1.2554
							ErrBox	ErrBox
							45.85	1.25842
							46.15	1.25842
							46.15	1.25945
							45.85	1.25945
							45.85	1.25842
							ErrBox	ErrBox
							46.85	1.25901
							47.15	1.25901
							47.15	1.26137
							46.85	1.26137
							46.85	1.25901
							ErrBox	ErrBox
							47.85	1.26014
							48.15	1.26014
							48.15	1.26295
							47.85	1.26295
							47.85	1.26014
							ErrBox	ErrBox
							48.85	1.26169
							49.15	1.26169
							49.15	1.2654
							48.85	1.2654
							48.85	1.26169
							ErrBox	ErrBox
							49.85	1.26393
							50.15	1.26393
							50.15	1.26677
							49.85	1.26677
							49.85	1.26393
							ErrBox	ErrBox
							50.85	1.2664
							51.15	1.2664
							51.15	1.26762
							50.85	1.26762
							50.85	1.2664
							ErrBox	ErrBox
							51.85	1.26825
							52.15	1.26825
							52.15	1.27002
							51.85	1.27002
							51.85	1.26825
							ErrBox	ErrBox
							52.85	1.27289
							53.15	1.27289
							53.15	1.27454
							52.85	1.27454
							52.85	1.27289
							ErrBox	ErrBox
							53.85	1.27212
							54.15	1.27212
							54.15	1.27531
							53.85	1.27531
							53.85	1.27212
							ErrBox	ErrBox
							54.85	1.27473
							55.15	1.27473
							55.15	1.27653
							54.85	1.27653
							54.85	1.27473
							ErrBox	ErrBox
							55.85	1.27928
							56.15	1.27928
							56.15	1.28155
							55.85	1.28155
							55.85	1.27928
							ErrBox	ErrBox
							56.85	1.28232
							57.15	1.28232
							57.15	1.28388
							56.85	1.28388
							56.85	1.28232
							ErrBox	ErrBox
							57.85	1.30738
							58.15	1.30738
							58.15	1.31405
							57.85	1.31405
							57.85	1.30738
							ErrBox	ErrBox
							58.85	1.32771
							59.15	1.32771
							59.15	1.32977
							58.85	1.32977
							58.85	1.32771
							ErrBox	ErrBox
							59.85	1.35457
							60.15	1.35457
							60.15	1.35604
							59.85	1.35604
							59.85	1.35457
							ErrBox	ErrBox
							60.85	1.35624
							61.15	1.35624
							61.15	1.3587
							60.85	1.3587
							60.85	1.35624
							ErrBox	ErrBox
							61.85	1.3651
							62.15	1.3651
							62.15	1.36796
							61.85	1.36796
							61.85	1.3651
							ErrBox	ErrBox
							62.85	1.36688
							63.15	1.36688
							63.15	1.37829
							62.85	1.37829
							62.85	1.36688
							ErrBox	ErrBox
							63.85	1.37071
							64.15	1.37071
							64.15	1.37755
							63.85	1.37755
							63.85	1.37071
							ErrBox	ErrBox

## Sheet: PlotDat6
Source sheet	all data	0.507301	0.086231	0	0	0.217708	0.0315113	0.585443	0.0872313	0.60889	0.0509726	1.27459	0.0981412	0.520621	0.0584083	0.564923	0.0616199	1.13687	0.0975907	0.929056	0.0892768	0.471655	0.0563562	0.514135	0.0607676	0.524637	0.0621824	1.10001	0.106014	0.515909	0.0613513	0.689181	0.0776229	0.91405	0.0977054	0.795268	0.0876033	0.981341	0.0972982	0.461389	0.0573421	0.740807	0.0808673	0.45886	0.0572883	0.844087	0.0939717	0.439518	0.0563922
Plot name	Concordia0	0.554016	0.0505462	0.123123	0.0184575	0.482812	0.0640155	0.583933	0.0878952	0.607834	0.0512369	1.27149	0.098689	0.520161	0.0586438	0.564315	0.0618844	1.13489	0.0980603	0.928128	0.0896853	0.471358	0.0565094	0.513778	0.0609585	0.524256	0.0623855	1.09879	0.106468	0.515347	0.0615969	0.688499	0.0779329	0.913448	0.0979984	0.794497	0.0879798	0.979391	0.0977811	0.460972	0.0575654	0.739588	0.0813027	0.458463	0.0575067	0.843549	0.0942423	0.439204	0.056574
Plot Type	1	1.11334	0.0975325	0.261406	0.0372556	0.805631	0.097544	0.579478	0.0884951	0.604709	0.0514748	1.26231	0.0991924	0.518821	0.0588299	0.562528	0.0621113	1.12903	0.0984856	0.92541	0.0900126	0.470503	0.0566173	0.51274	0.061109	0.523147	0.062548	1.0952	0.106861	0.513691	0.0618113	0.686498	0.0781976	0.911694	0.0982275	0.79224	0.0882894	0.973625	0.0982219	0.459753	0.0577513	0.735989	0.0816906	0.457305	0.0576857	0.841981	0.0944574	0.438295	0.0567151
1st free col	251	0.497263	0.0573591	0.416715	0.0564008	1.19873	0.132129	0.572249	0.089008	0.599636	0.0516769	1.24741	0.099632	0.516652	0.0589595	0.55963	0.062292	1.11951	0.0988503	0.921009	0.0902461	0.469123	0.0566759	0.511061	0.0612136	0.521354	0.0626636	1.08938	0.107178	0.511006	0.0619862	0.683254	0.078407	0.908854	0.0983839	0.788585	0.0885199	0.964262	0.0986037	0.457778	0.0578926	0.730148	0.0820159	0.455432	0.0578186	0.839443	0.0946089	0.436827	0.0568102
Sigma Level	2	0.533625	0.0609068	0.591146	0.0758993	1.67741	0.167804	0.562524	0.0894142	0.59281	0.0518355	1.22735	0.0999909	0.513738	0.0590276	0.555733	0.0624194	1.10671	0.0991403	0.915092	0.0903769	0.467269	0.056683	0.508806	0.061268	0.518944	0.0627278	1.08155	0.107405	0.507394	0.0621149	0.678891	0.0785529	0.905038	0.0984615	0.783672	0.0886627	0.951662	0.0989118	0.455125	0.0579838	0.722289	0.0822662	0.452914	0.0579002	0.836033	0.0946909	0.434856	0.0568557
Absolute Errs	FALSE	1.03392	0.0969073	0.787053	0.0957576	2.2603	0.204603	0.550677	0.0896981	0.584494	0.0519447	1.20292	0.100255	0.510191	0.0590316	0.550986	0.0624887	1.0911	0.0993445	0.907886	0.0904	0.465015	0.0566382	0.506062	0.0612702	0.516011	0.0627383	1.072	0.107536	0.502995	0.0621924	0.673577	0.0786298	0.900394	0.0984573	0.77769	0.0887122	0.936311	0.0991344	0.451894	0.0580214	0.712716	0.0824319	0.449849	0.0579274	0.831881	0.0947002	0.432457	0.0568496
Symbol Type	1	0.881575	0.0875727	1.00708	0.115983	2.97009	0.242562	0.537163	0.0898487	0.575006	0.052	1.17504	0.100415	0.506147	0.0589713	0.545572	0.0624972	1.0733	0.099455	0.89967	0.0903144	0.462446	0.0565433	0.502933	0.0612202	0.512666	0.0626945	1.06112	0.107563	0.497978	0.0622158	0.667517	0.0786347	0.895098	0.0983715	0.770869	0.0886664	0.918798	0.099263	0.44821	0.058004	0.701794	0.0825065	0.446355	0.0578991	0.827147	0.0946366	0.429723	0.0567924
Inverse Plot	FALSE	0.456829	0.0553339	1.2542	0.136581	3.83441	0.281716	0.522502	0.0898603	0.564711	0.0519995	1.14479	0.100464	0.501762	0.058849	0.539699	0.0624446	1.05399	0.0994676	0.890758	0.0901234	0.459661	0.0564019	0.49954	0.0611198	0.50904	0.0625982	1.04931	0.107488	0.492534	0.0621841	0.660943	0.0785674	0.889356	0.0982075	0.76347	0.0885273	0.899795	0.0992925	0.444215	0.0579324	0.689946	0.0824873	0.442566	0.0578165	0.822014	0.0945024	0.426759	0.0566861
Color Plot	TRUE	0.496064	0.0599101	1.53175	0.157559	4.8869	0.322105	0.507256	0.0897324	0.554005	0.0519432	1.11333	0.1004	0.497204	0.0586695	0.533592	0.0623328	1.03391	0.0993818	0.881493	0.0898344	0.456768	0.0562195	0.496014	0.0609729	0.50527	0.0624531	1.03703	0.107311	0.486874	0.0620986	0.654109	0.0784305	0.883386	0.0979714	0.755779	0.0883	0.880034	0.0992219	0.440061	0.0578091	0.677625	0.082375	0.438627	0.0576827	0.816678	0.0943028	0.423679	0.0565349
3D plot	FALSE	0.50532	0.0613278	1.84346	0.178925	6.16853	0.363766	0.492012	0.0894699	0.5433	0.0518332	1.08188	0.100227	0.492648	0.0584397	0.527487	0.0621663	1.01382	0.099201	0.872232	0.0894585	0.453876	0.0560031	0.492489	0.0607852	0.501503	0.0622648	1.02475	0.107041	0.481215	0.0619626	0.647275	0.0782293	0.87742	0.0976725	0.74809	0.0879934	0.860273	0.0990539	0.43591	0.057639	0.665305	0.0821738	0.434689	0.0575029	0.811345	0.0940455	0.420601	0.0563446
Linear	FALSE	1.03707	0.104869	2.19356	0.200685	7.72917	0.40674	0.477356	0.089083	0.533007	0.0516737	1.05163	0.0999492	0.488269	0.0581683	0.521617	0.0619514	0.994509	0.098932	0.863329	0.0890101	0.451098	0.0557609	0.489102	0.0605639	0.497882	0.0620404	1.01294	0.106687	0.475775	0.0617813	0.640706	0.0779715	0.871685	0.0973221	0.740699	0.0876192	0.841272	0.0987949	0.431919	0.0574285	0.653459	0.0818915	0.430905	0.0572839	0.806219	0.0937404	0.417643	0.0561225
Data Range	B3:F123	0.4869	0.0607835	2.58676	0.222846	9.62957	0.451068	0.46385	0.0885865	0.523521	0.0514708	1.02375	0.0995789	0.484236	0.0578658	0.516209	0.0616963	0.976712	0.0985851	0.855128	0.0885065	0.448541	0.0555023	0.485982	0.0603174	0.494547	0.0617887	1.00207	0.106264	0.470762	0.0615616	0.634654	0.0776669	0.866403	0.0969338	0.733891	0.0871918	0.823762	0.0984549	0.428243	0.0571859	0.642544	0.081539	0.42742	0.0570342	0.801497	0.0933992	0.41492	0.0558771
Filled Symbols	TRUE	0.65415	0.0767564	3.02838	0.245417	11.9437	0.496793	0.452015	0.0879995	0.515207	0.0512325	0.999321	0.09913	0.480704	0.0575438	0.511471	0.0614109	0.961113	0.0981738	0.847943	0.087967	0.446301	0.0552373	0.48325	0.0600553	0.491626	0.0615192	0.992533	0.105787	0.466369	0.061312	0.62935	0.0773274	0.861777	0.0965224	0.727927	0.0867276	0.808414	0.0980469	0.425023	0.0569204	0.632977	0.0811298	0.424367	0.0567634	0.797361	0.0930349	0.412535	0.0556179
ConcAge	FALSE	0.88346	0.0963342	3.52436	0.268404	14.7617	0.543959	0.442303	0.0873445	0.508384	0.0509677	0.97927	0.0986197	0.477808	0.0572148	0.507583	0.0611061	0.948313	0.0977139	0.84205	0.0874123	0.444467	0.0549759	0.481011	0.0597876	0.489231	0.0612424	0.984712	0.105274	0.462765	0.0610421	0.625	0.076966	0.857984	0.0961037	0.723036	0.0862445	0.795819	0.0975867	0.422383	0.0566421	0.625128	0.0806797	0.421864	0.0564818	0.79397	0.0926617	0.410581	0.0553548
ConcSwap	FALSE	0.75585	0.0862349	4.08142	0.291816	18.1931	0.592611	0.43509	0.0866467	0.503315	0.0506868	0.964371	0.0980676	0.47566	0.0568913	0.504697	0.0607937	0.938802	0.0972229	0.837677	0.0868638	0.443107	0.0547283	0.479349	0.0595246	0.487455	0.0609689	0.978903	0.104746	0.460089	0.0607623	0.62177	0.0765964	0.855169	0.095694	0.719405	0.085761	0.786462	0.0970919	0.420423	0.0563619	0.619297	0.0802058	0.420006	0.0562004	0.791454	0.0922938	0.409132	0.0550979
1st Symbol-row	1	0.880049	0.0966867	4.70706	0.31566	22.3716	0.642797	0.430652	0.0859329	0.500194	0.0504005	0.955198	0.097495	0.474341	0.0565857	0.502922	0.0604856	0.932946	0.0967198	0.83499	0.0863426	0.442275	0.054504	0.47833	0.0592764	0.486365	0.0607091	0.97533	0.104223	0.458443	0.0604833	0.619784	0.0762331	0.853442	0.0953088	0.717176	0.0852958	0.780701	0.0965815	0.41922	0.0560905	0.615709	0.0797265	0.418867	0.0559298	0.78991	0.0919454	0.408244	0.0548572
		0.440104	0.0565901	5.40973	0.339943	27.4597	0.694563	0.429159	0.0852306	0.499142	0.0501197	0.952102	0.0969238	0.473904	0.0563099	0.502327	0.0601937	0.930971	0.0962239	0.834093	0.0858686	0.442002	0.0543116	0.477993	0.0590526	0.486003	0.0604732	0.974129	0.103724	0.45789	0.0602158	0.619119	0.0758898	0.852869	0.0949631	0.716432	0.0848666	0.778757	0.0960751	0.418819	0.0558382	0.614501	0.0792602	0.418488	0.0556806	0.789398	0.0916299	0.407952	0.0546417
		0.677654	0.0800637	6.19892	0.364675	IsoLine	IsoLine	0.430669	0.0845667	0.500199	0.0498554	0.955202	0.0963759	0.474364	0.0560744	0.502934	0.0599292	0.932953	0.0957543	0.835022	0.0854601	0.442299	0.0541585	0.47835	0.0588617	0.486384	0.06027	0.975347	0.10327	0.458453	0.0599701	0.619801	0.0755798	0.853471	0.09467	0.717204	0.08449	0.780707	0.0955923	0.419237	0.0556149	0.61572	0.0788247	0.418885	0.0554623	0.789936	0.0913594	0.408266	0.05446
		0.438674	0.0564845	7.08528	0.389864			0.435124	0.0839668	0.503323	0.0496176	0.96438	0.0958726	0.475705	0.0558883	0.504721	0.0597023	0.938814	0.095329	0.837739	0.0851328	0.443154	0.0540505	0.479388	0.0587111	0.487493	0.0601076	0.978937	0.102877	0.460109	0.0597557	0.621802	0.0753151	0.855226	0.0944409	0.71946	0.0841805	0.786473	0.0951515	0.420456	0.055429	0.619319	0.0784369	0.420043	0.0552833	0.791504	0.0911442	0.409175	0.0543188
		0.816742	0.0928008	8.08077	0.415517			0.442353	0.0834539	0.508396	0.0494154	0.979282	0.095433	0.477873	0.0557587	0.507619	0.0595216	0.948331	0.0949643	0.842141	0.0848992	0.444535	0.0539919	0.481067	0.0586066	0.489286	0.059992	0.984761	0.102561	0.462794	0.0595808	0.625046	0.0751057	0.858065	0.0942845	0.723115	0.08395	0.795836	0.0947697	0.42243	0.0552877	0.62516	0.0781116	0.421917	0.0551504	0.794042	0.0909928	0.410643	0.0542237
		0.423735	0.055517	9.19882	0.441644			0.452078	0.0830477	0.515222	0.0492568	0.999336	0.0950741	0.480787	0.0556906	0.511517	0.0593942	0.961136	0.0946743	0.848058	0.0847684	0.446388	0.0539848	0.483322	0.0585522	0.491696	0.0599277	0.992595	0.102333	0.466405	0.0594521	0.629409	0.0749598	0.861881	0.094207	0.728028	0.0838072	0.808436	0.0944616	0.425084	0.0551965	0.633019	0.0778613	0.424434	0.0550688	0.797452	0.0909108	0.412615	0.0541783
		1.00598	0.110112	10.4545	0.468253			0.463925	0.0827639	0.523539	0.0491477	1.02377	0.0948097	0.484334	0.0556866	0.516263	0.0593249	0.976739	0.0944701	0.855263	0.0847454	0.448642	0.0540296	0.486066	0.05855	0.49463	0.0599173	1.00214	0.102203	0.470805	0.0593746	0.634723	0.0748829	0.866525	0.0942111	0.73401	0.0837577	0.823787	0.094239	0.428315	0.0551589	0.642592	0.0776956	0.427499	0.0550416	0.801604	0.0909014	0.415013	0.0541843
		1.03259	0.112361	11.8649	0.495353			0.477439	0.0826133	0.533027	0.0490923	1.05165	0.0946499	0.488378	0.0557469	0.521677	0.0593164	0.994539	0.0943596	0.863479	0.084831	0.451211	0.0541245	0.489195	0.0586	0.497974	0.0599611	1.01302	0.102175	0.475822	0.0593513	0.640783	0.074878	0.871821	0.0942969	0.740832	0.0838035	0.8413	0.0941104	0.431999	0.0551762	0.653513	0.0776209	0.430993	0.0550698	0.806337	0.0909651	0.417747	0.0542415
		0.510182	0.0650013	13.4488	0.522954			0.4921	0.0826017	0.543322	0.0490928	1.0819	0.0946009	0.492763	0.0558692	0.527551	0.059369	1.01385	0.094347	0.872391	0.0850219	0.453996	0.0542659	0.492588	0.0587004	0.5016	0.0600573	1.02483	0.102251	0.481266	0.0593829	0.647356	0.0749453	0.877564	0.0944609	0.748231	0.0839426	0.860303	0.0940809	0.435994	0.0552479	0.665362	0.0776401	0.434783	0.0551524	0.811471	0.0910992	0.420711	0.0543478
		0.466519	0.0604051	15.2278	0.551064			0.507346	0.0827295	0.554027	0.0491491	1.11335	0.0946645	0.497321	0.0560487	0.533657	0.0594807	1.03394	0.0944328	0.881656	0.0853109	0.45689	0.0544483	0.496114	0.0588472	0.50537	0.0602025	1.03711	0.102427	0.486926	0.0594684	0.654191	0.0750822	0.883533	0.094697	0.755922	0.0841699	0.880064	0.0941515	0.440147	0.0553712	0.677683	0.0777525	0.438722	0.0552862	0.816807	0.0912988	0.423792	0.054499
		0.674108	0.0815207	17.2258	0.579692			0.52259	0.082992	0.564732	0.0492592	1.14481	0.0948384	0.501877	0.0562785	0.539763	0.0596473	1.05402	0.0946136	0.890917	0.0856869	0.459781	0.0546648	0.499639	0.0590349	0.509137	0.0603908	1.04939	0.102697	0.492585	0.0596044	0.661025	0.0752834	0.889499	0.0949959	0.763611	0.0844765	0.899825	0.0943195	0.444299	0.0555413	0.690003	0.0779537	0.442659	0.0554661	0.82214	0.0915561	0.42687	0.0546893
		8.55433	0.381383	19.4699	0.60885			0.537246	0.0833789	0.575026	0.0494187	1.17506	0.0951158	0.506256	0.0565499	0.545632	0.0598622	1.07333	0.0948826	0.89982	0.0861352	0.462559	0.0549069	0.503026	0.0592563	0.512758	0.0606152	1.0612	0.103051	0.498025	0.0597858	0.667594	0.0755413	0.895234	0.0953463	0.771001	0.0848507	0.918826	0.0945785	0.44829	0.0557517	0.701849	0.0782359	0.446443	0.055685	0.827266	0.0918612	0.429827	0.0549114
		0.810977	0.0942004	21.9902	0.638545			0.550752	0.0838754	0.584512	0.0496215	1.20293	0.0954861	0.510289	0.0568524	0.55104	0.0601173	1.09113	0.0952295	0.908021	0.0866389	0.465117	0.0551655	0.506146	0.0595028	0.516093	0.0608669	1.07208	0.103474	0.503038	0.0600055	0.673646	0.0758458	0.900516	0.0957347	0.777809	0.0852781	0.936336	0.0949185	0.451966	0.0559944	0.712764	0.0785884	0.449929	0.0559348	0.831988	0.0922025	0.432551	0.0551568
		0.448228	0.0585257	24.8208	0.668788			0.562587	0.0844624	0.592826	0.0498598	1.22737	0.095935	0.513821	0.0571744	0.555779	0.0604027	1.10673	0.0956408	0.915206	0.0871784	0.467356	0.0554306	0.508878	0.0597649	0.519014	0.0611364	1.08161	0.103952	0.507431	0.0602551	0.67895	0.0761853	0.905142	0.0961461	0.783774	0.0857423	0.951684	0.0953265	0.455186	0.0562599	0.722331	0.0789976	0.452982	0.0562056	0.836124	0.0925667	0.434935	0.055416
		0.67861	0.082138	28	0.69959			0.572299	0.0851174	0.599648	0.0501246	1.24742	0.0964453	0.516717	0.0575034	0.559666	0.0607075	1.11953	0.0961007	0.921099	0.087733	0.46919	0.0556919	0.511117	0.0600326	0.521409	0.0614132	1.08943	0.104464	0.511035	0.060525	0.6833	0.0765468	0.908935	0.0965647	0.788665	0.0862254	0.964279	0.0957867	0.457826	0.0565381	0.73018	0.0794478	0.455485	0.0564871	0.839514	0.0929399	0.43689	0.0556791
		0.702357	0.0844416	28	0.69959			0.579512	0.0858152	0.604717	0.0504055	1.26232	0.0969974	0.518866	0.0578269	0.562553	0.0610199	1.12904	0.0965917	0.925473	0.0882815	0.47055	0.0559395	0.512779	0.0602956	0.523186	0.0616867	1.09524	0.104992	0.513711	0.0608048	0.68653	0.0769163	0.91175	0.0969744	0.792295	0.0867088	0.973636	0.0962815	0.459786	0.0568184	0.736011	0.0799216	0.457342	0.0567686	0.84203	0.0933078	0.438338	0.055936
		0.449425	0.0587298	IsoLine	IsoLine			0.58395	0.086529	0.607838	0.0506919	1.27149	0.09757	0.520184	0.0581325	0.564328	0.061328	1.1349	0.0970948	0.928159	0.0888028	0.471382	0.0561638	0.513798	0.0605438	0.524275	0.0619464	1.09881	0.105515	0.515357	0.0610838	0.688515	0.0772796	0.913477	0.0973596	0.794525	0.0871741	0.979397	0.0967919	0.460989	0.0570898	0.739599	0.0804009	0.458482	0.0570391	0.843574	0.0936562	0.439226	0.0561768
		0.464016	0.0604878					0.585443	0.0872313	0.60889	0.0509726	1.27459	0.0981412	0.520621	0.0584083	0.564923	0.0616199	1.13687	0.0975907	0.929056	0.0892768	0.471655	0.0563562	0.514135	0.0607676	0.524637	0.0621824	1.10001	0.106014	0.515909	0.0613513	0.689181	0.0776229	0.91405	0.0977054	0.795268	0.0876033	0.981341	0.0972982	0.461389	0.0573421	0.740807	0.0808673	0.45886	0.0572883	0.844087	0.0939717	0.439518	0.0563922
		0.702211	0.0847761					ErrEll	ErrEll	ErrEll	ErrEll	ErrEll	ErrEll	ErrEll	ErrEll	ErrEll	ErrEll	ErrEll	ErrEll	ErrEll	ErrEll	ErrEll	ErrEll	ErrEll	ErrEll	ErrEll	ErrEll	ErrEll	ErrEll	ErrEll	ErrEll	ErrEll	ErrEll	ErrEll	ErrEll	ErrEll	ErrEll	ErrEll	ErrEll	ErrEll	ErrEll	ErrEll	ErrEll	ErrEll	ErrEll	ErrEll	ErrEll	ErrEll	ErrEll
		0.815709	0.0954423
		9.68451	0.41348
		0.790727	0.0932231
		1.03127	0.114345
		3.87406	0.267148
		0.75961	0.0907814
		0.769858	0.0917924
		0.420018	0.0559001
		0.703284	0.0855884
		0.803601	0.0950365
		11.5779	0.456453
		0.754892	0.0905734
		0.844661	0.0988403
		0.419893	0.0559609
		0.861352	0.100425
		0.709828	0.0863753
		4.59811	0.296054
		0.667126	0.0822438
		0.738104	0.0891313
		0.689951	0.084496
		1.01226	0.113589
		3.85898	0.269775
		0.589767	0.0744755
		0.777839	0.0929925
		0.807678	0.0957884
		12.0808	0.470453
		0.848715	0.099612
		0.662423	0.0819629
		0.732805	0.0888446
		0.698124	0.0855102
		5.42132	0.324905
		6.3269	0.351696
		0.774678	0.0930107
		0.762029	0.0918424
		0.468443	0.0616846
		0.793192	0.0947876
		0.681557	0.0841197
		22.8605	0.614019
		0.443918	0.0589799
		4.50472	0.297456
		14.6112	0.516349
		5.2703	0.324059
		17.0561	0.551497
		0.878939	0.10293
		0.740128	0.0900117
		5.22213	0.322867
		4.51012	0.299063
		0.716771	0.0877989
		0.693437	0.0855096
		5.30699	0.326475
		6.42051	0.359544
		0.73612	0.0897518
		6.14076	0.352101
		0.781961	0.0941862
		0.733018	0.0894922
		6.04844	0.349764
		12.381	0.487276
		21.1636	0.607072
		13.8904	0.513373
		5.25105	0.326977
		1.41709	0.147276
		6.75204	0.372785
		13.0041	0.502883
		0.449857	0.0599462
		5.9723	0.350783
		6.32216	0.361127
		0.425951	0.0572288
		0.697157	0.0863905
		0.808405	0.0972278
		0.873971	0.103487
		10.9504	0.473029
		4.54715	0.307362
		5.57715	0.343086
		4.85674	0.319368
		0.698101	0.0868139
		6.65414	0.375842
		2.27559	0.20509
		0.640635	0.0812291
		14.1273	0.537794
		0.458615	0.0613887
		2.94981	0.244852
		0.37661	0.0519739
		3.67587	0.286344
		9.80881	0.481017
		6.18105	0.38494
		0.401269	0.0555055
		12.2326	0.560199
		IsoLine	IsoLine
[truncated: 200 more columns]

## Sheet: PlotDat0
Source sheet	all data	0.37661	0.0519739	0	0	0.217708	0.0315113	0.393122	0.053264	0.437551	0.0567507	0.435374	0.0567971	0.442443	0.057972	0.457538	0.0598946	0.467579	0.0607949	0.477333	0.0620929	0.487305	0.0630676	0.609679	0.075559	0.670498	0.0821341	0.689653	0.0829279	0.691994	0.0834889	0.709632	0.0850988	0.72376	0.0854738	0.716649	0.0867459	0.722964	0.0867277	0.72786	0.0867936	0.734315	0.0877076	0.728123	0.0873806	0.717349	0.0881437	0.739386	0.089414
Plot name	Concordia0	0.420018	0.0559001	0.123123	0.0184575	0.482812	0.0640155	0.392787	0.0534583	0.437203	0.0569528	0.435066	0.056978	0.442117	0.0581612	0.457264	0.0600528	0.467228	0.0609989	0.476965	0.0622985	0.486925	0.0632806	0.609283	0.0757802	0.669915	0.0824311	0.68912	0.0832059	0.691501	0.0837578	0.709082	0.0853837	0.7231	0.0857975	0.716188	0.0869979	0.722473	0.0869942	0.727373	0.0870558	0.733829	0.0879701	0.727517	0.0876885	0.716963	0.0883492	0.738932	0.0896483
Plot Type	1	0.419893	0.0559609	0.261406	0.0372556	0.805631	0.097544	0.391831	0.0535956	0.436195	0.0571144	0.434175	0.0571198	0.441169	0.0583145	0.456478	0.0601697	0.466209	0.0611625	0.475892	0.0624692	0.485835	0.0634322	0.608137	0.0759514	0.668206	0.0826819	0.68756	0.0834361	0.690072	0.0839685	0.707474	0.08562	0.721167	0.0860711	0.714853	0.0871926	0.721046	0.0872038	0.725962	0.0872616	0.73242	0.0881712	0.725745	0.0879465	0.715853	0.0884957	0.737627	0.0898115
1st free col	163	0.425951	0.0572288	0.416715	0.0564008	1.19873	0.132129	0.39029	0.0536706	0.434566	0.0572293	0.432735	0.057217	0.439637	0.0584262	0.455209	0.0602408	0.464562	0.0612794	0.474155	0.0625983	0.484076	0.0635167	0.606286	0.0760658	0.665438	0.082877	0.685034	0.0836097	0.687761	0.084113	0.70487	0.0857987	0.718034	0.0862842	0.712695	0.0873227	0.718738	0.0873482	0.723678	0.0874031	0.730144	0.0883034	0.722874	0.0881447	0.71406	0.0885776	0.735521	0.0898973
Sigma Level	2	0.443918	0.0589799	0.591146	0.0758993	1.67741	0.167804	0.388224	0.0536804	0.432377	0.0572932	0.430801	0.0572659	0.437579	0.0584918	0.453506	0.0602636	0.46235	0.061345	0.471821	0.062681	0.481717	0.0635308	0.603799	0.0761191	0.661717	0.0830087	0.68164	0.08372	0.684657	0.0841856	0.701371	0.0859128	0.713822	0.0864286	0.709797	0.0873831	0.715637	0.087422	0.720611	0.0874748	0.727086	0.0883615	0.719015	0.0882755	0.711654	0.0885916	0.732693	0.0899025
Absolute Errs	FALSE	0.449857	0.0599462	0.787053	0.0957576	2.2603	0.204603	0.385711	0.0536246	0.429714	0.0573035	0.428449	0.0572647	0.435074	0.0585089	0.451434	0.060237	0.459658	0.0613569	0.468979	0.062714	0.478847	0.0634739	0.600773	0.0761092	0.657186	0.083072	0.677507	0.0837628	0.680879	0.0841836	0.697109	0.0859581	0.708692	0.0864988	0.70627	0.0873715	0.711864	0.0874223	0.716878	0.0874741	0.723366	0.0883432	0.714316	0.0883338	0.708727	0.0885374	0.729254	0.0898269
Symbol Type	1	0.458615	0.0613887	1.00708	0.115983	2.97009	0.242562	0.382848	0.0535054	0.426677	0.0572599	0.425767	0.0572134	0.432219	0.0584768	0.449074	0.060162	0.456589	0.0613145	0.465739	0.0626961	0.475578	0.0633483	0.597324	0.0760366	0.652018	0.0830644	0.672794	0.0837364	0.676573	0.084107	0.69225	0.0859327	0.702842	0.086492	0.70225	0.0872884	0.707563	0.0873492	0.712623	0.0874009	0.719125	0.0882493	0.708958	0.0883175	0.705392	0.0884169	0.725336	0.0896733
Inverse Plot	FALSE	0.468443	0.0616846	1.2542	0.136581	3.83441	0.281716	0.379746	0.0533273	0.423385	0.057164	0.42286	0.057114	0.429122	0.0583967	0.446516	0.0600417	0.453261	0.0612196	0.462226	0.0626279	0.472035	0.0631587	0.593585	0.0759039	0.646413	0.0829864	0.667683	0.0836418	0.671904	0.0839589	0.686981	0.0858376	0.696497	0.0864084	0.697891	0.0871369	0.702899	0.0872054	0.708008	0.087258	0.714527	0.0880834	0.703146	0.0882271	0.701776	0.0882349	0.721088	0.0894477
Color Plot	TRUE	0.589767	0.0744755	1.53175	0.157559	4.8869	0.322105	0.376523	0.0530972	0.419964	0.0570196	0.419838	0.0569703	0.425904	0.0582717	0.443858	0.0598805	0.449803	0.0610757	0.458573	0.0625122	0.468353	0.0629125	0.589699	0.0757164	0.640586	0.0828408	0.662369	0.0834828	0.667051	0.0837448	0.681502	0.0856765	0.689901	0.0862514	0.693361	0.0869229	0.698052	0.0869964	0.703212	0.087051	0.709748	0.0878519	0.697104	0.0880662	0.69802	0.0879982	0.716674	0.0891588
3D plot	FALSE	0.640635	0.0812291	1.84346	0.178925	6.16853	0.363766	0.373303	0.0528239	0.416544	0.0568321	0.416819	0.0567877	0.422688	0.0581067	0.441202	0.0596848	0.446347	0.0608885	0.454922	0.0623532	0.464675	0.0626191	0.585816	0.0754812	0.634762	0.0826333	0.657058	0.0832653	0.662201	0.083473	0.676026	0.0854556	0.683306	0.0860269	0.688834	0.0866545	0.693207	0.0867303	0.698419	0.0867878	0.704972	0.0875636	0.691064	0.0878408	0.694266	0.087716	0.712264	0.0888175
Linear	FALSE	0.662423	0.0819629	2.19356	0.200685	7.72917	0.40674	0.370211	0.052518	0.413258	0.0566088	0.413918	0.0565734	0.419597	0.057908	0.43865	0.0594619	0.443025	0.060665	0.451413	0.0621572	0.461142	0.0622898	0.582084	0.0752073	0.629162	0.0823718	0.651953	0.0829978	0.65754	0.0831541	0.670762	0.0851833	0.676966	0.0857436	0.684484	0.0863422	0.688551	0.0864174	0.693813	0.0864784	0.700383	0.0872297	0.685258	0.0875597	0.69066	0.0873991	0.708027	0.0884372
Data Range	AA3:AE79	0.667126	0.0822438	2.58676	0.222846	9.62957	0.451068	0.367364	0.0521912	0.410232	0.0563583	0.411246	0.0563356	0.41675	0.0576831	0.436301	0.0592205	0.439966	0.0604139	0.448181	0.0619316	0.457889	0.0619372	0.578648	0.0749053	0.624004	0.0820664	0.64725	0.0826905	0.653247	0.0828001	0.665913	0.0848702	0.671126	0.0854124	0.680478	0.0859979	0.684263	0.0860695	0.689571	0.0861349	0.696157	0.0868629	0.679909	0.0872337	0.68734	0.0870597	0.704126	0.0880322
Filled Symbols	TRUE	0.681557	0.0841197	3.02838	0.245417	11.9437	0.496793	0.364873	0.051856	0.407582	0.0560902	0.408907	0.0560833	0.414257	0.0574408	0.434245	0.0589699	0.437287	0.0601448	0.44535	0.0616852	0.455042	0.0615749	0.575639	0.0745868	0.619485	0.0817288	0.643131	0.0823553	0.649488	0.0824247	0.661666	0.0845283	0.666009	0.0850459	0.67697	0.0856348	0.680508	0.0857002	0.685856	0.0857704	0.692456	0.0864773	0.675224	0.0868753	0.684433	0.0867109	0.700712	0.0876184
ConcAge	FALSE	0.689951	0.084496	3.52436	0.268404	14.7617	0.543959	0.362833	0.0515253	0.40541	0.0558148	0.40699	0.0558264	0.412213	0.0571903	0.43256	0.0587197	0.435092	0.0598681	0.443028	0.0614274	0.45271	0.0612169	0.573173	0.074264	0.615778	0.081372	0.639752	0.0820049	0.646407	0.0820424	0.658182	0.0841706	0.661812	0.0846583	0.674094	0.0852669	0.67743	0.0853236	0.682811	0.0853989	0.689423	0.0860879	0.671381	0.0864982	0.682052	0.0863661	0.697914	0.0872114
ConcSwap	FALSE	0.693437	0.0855096	4.08142	0.291816	18.1931	0.592611	0.361322	0.0512119	0.403799	0.0555426	0.405569	0.0555746	0.410697	0.0569413	0.431312	0.0584794	0.433463	0.0595944	0.441306	0.0611681	0.450983	0.0608768	0.571344	0.0739493	0.613027	0.0810098	0.637245	0.081653	0.644122	0.0816679	0.655597	0.083811	0.658697	0.0842645	0.671962	0.0849083	0.675147	0.0849542	0.680552	0.0850346	0.687174	0.0857095	0.668529	0.0861171	0.680287	0.0860384	0.695841	0.0868271
1st Symbol-row	1	0.698124	0.0855102	4.70706	0.31566	22.3716	0.642797	0.360399	0.0509278	0.402811	0.0552842	0.404698	0.0553377	0.409768	0.0567034	0.430549	0.0582584	0.432465	0.0593343	0.440249	0.0609173	0.449926	0.0605677	0.570224	0.0736549	0.611337	0.0806559	0.635706	0.081313	0.642721	0.0813154	0.65401	0.0834632	0.656783	0.0838796	0.670655	0.0845728	0.673747	0.0846061	0.679167	0.0846917	0.685796	0.0853567	0.666776	0.0857464	0.679208	0.0857406	0.694572	0.0864801
		0.703284	0.0855884	5.40973	0.339943	27.4597	0.694563	0.360099	0.0506839	0.402485	0.0550495	0.404411	0.0551247	0.40946	0.0564856	0.430299	0.0580651	0.432135	0.0590976	0.439897	0.0606846	0.449581	0.0603016	0.569855	0.073392	0.610773	0.0803241	0.635193	0.0809979	0.642258	0.0809987	0.653481	0.0831407	0.656143	0.0835183	0.670224	0.0842734	0.673284	0.0842927	0.678709	0.0843832	0.685341	0.085043	0.666192	0.0854005	0.678854	0.085484	0.694157	0.0861837
		0.709828	0.0863753	6.19892	0.364675	IsoLine	IsoLine	0.360433	0.0504895	0.402833	0.0548474	0.404719	0.0549438	0.409786	0.0562964	0.430572	0.057907	0.432486	0.0588935	0.440265	0.060479	0.449961	0.0600886	0.57025	0.0731707	0.611356	0.0800271	0.635727	0.0807199	0.64275	0.0807298	0.654031	0.0828558	0.656802	0.0831946	0.670685	0.0840214	0.673776	0.0840262	0.679195	0.084121	0.685827	0.0847805	0.666797	0.0850926	0.679239	0.0852785	0.69461	0.0859495
		0.697157	0.0863905	7.08528	0.389864			0.361389	0.0503522	0.403841	0.0546858	0.405611	0.0548021	0.410733	0.0561431	0.431358	0.05779	0.433505	0.05873	0.441338	0.0603083	0.451052	0.059937	0.571396	0.0729995	0.613064	0.0797762	0.637287	0.0804897	0.64418	0.0805191	0.655639	0.0826195	0.658736	0.082921	0.67202	0.0838266	0.675203	0.0838167	0.680607	0.0839152	0.687236	0.0845793	0.66857	0.0848346	0.68035	0.085132	0.695915	0.0857863
		0.698101	0.0868139	8.08077	0.415517			0.36293	0.0502772	0.40547	0.0545709	0.407051	0.0547049	0.412265	0.0560314	0.432628	0.0577189	0.435152	0.0586131	0.443075	0.0601791	0.45281	0.0598525	0.573248	0.0728851	0.615833	0.0795812	0.639812	0.0803162	0.646491	0.0803746	0.658243	0.0824408	0.661869	0.0827079	0.674178	0.0836966	0.677511	0.0836722	0.68289	0.0837737	0.689513	0.0844472	0.67144	0.0846364	0.682143	0.0850502	0.698022	0.0857004
		0.716771	0.0877989	9.19882	0.441644			0.364997	0.0502674	0.407659	0.054507	0.408984	0.0546559	0.414323	0.0559658	0.43433	0.0576961	0.437364	0.0585475	0.44541	0.0600965	0.45517	0.0598384	0.575734	0.0728318	0.619554	0.0794495	0.643207	0.0802059	0.649595	0.080302	0.661742	0.0823266	0.666081	0.0825635	0.677076	0.0836361	0.680611	0.0835984	0.685957	0.0837019	0.69257	0.0843891	0.675299	0.0845056	0.684549	0.0850361	0.700849	0.0856952
		0.732805	0.0888446	10.4545	0.468253			0.36751	0.0503232	0.410322	0.0544967	0.411337	0.0546571	0.416828	0.0559487	0.436402	0.0577227	0.440056	0.0585356	0.448251	0.0600635	0.458039	0.0598953	0.57876	0.0728417	0.624085	0.0793862	0.64734	0.0801631	0.653372	0.080304	0.666004	0.0822814	0.671211	0.0824933	0.680603	0.0836477	0.684385	0.0835981	0.68969	0.0837027	0.696291	0.0844073	0.679998	0.0844472	0.687476	0.0850903	0.704288	0.0857709
		0.738104	0.0891313	11.8649	0.495353			0.370373	0.0504425	0.413359	0.0545403	0.414019	0.0547084	0.419684	0.0559808	0.438762	0.0577977	0.443125	0.0585779	0.451491	0.0600814	0.461308	0.0600209	0.582209	0.0729144	0.629253	0.0793937	0.652053	0.0801895	0.657679	0.0803806	0.670863	0.0823068	0.67706	0.0825001	0.684623	0.0837309	0.688686	0.0836713	0.693946	0.0837759	0.700532	0.0845012	0.685357	0.0844636	0.690811	0.0852108	0.708207	0.0859244
		0.733018	0.0894922	13.4488	0.522954			0.373475	0.0506205	0.416651	0.0546362	0.416926	0.0548078	0.42278	0.0560609	0.44132	0.057918	0.446453	0.0586729	0.455005	0.0601495	0.464852	0.0602105	0.585948	0.073047	0.634857	0.0794718	0.657164	0.080284	0.662348	0.0805287	0.676133	0.0824018	0.683405	0.0825837	0.688982	0.0838824	0.69335	0.0838151	0.69856	0.0839187	0.70513	0.0846671	0.691169	0.0845539	0.694427	0.0853929	0.712455	0.08615
		0.73612	0.0897518	15.2278	0.551064			0.376698	0.0508506	0.420072	0.0547806	0.419947	0.0549516	0.425998	0.0561858	0.443979	0.0580792	0.449911	0.0588167	0.458658	0.0602653	0.468533	0.0604567	0.589834	0.0732345	0.640684	0.0796174	0.662477	0.0804431	0.667201	0.0807428	0.681611	0.0825629	0.690002	0.0827407	0.693512	0.0840964	0.698197	0.084024	0.703356	0.0841258	0.709908	0.0848987	0.697211	0.0847149	0.698183	0.0856296	0.716868	0.086439
		0.740128	0.0900117	17.2258	0.579692			0.379918	0.0511239	0.423492	0.0549681	0.422967	0.0551341	0.429215	0.0563509	0.446634	0.0582749	0.453368	0.059004	0.462309	0.0604243	0.472211	0.0607501	0.593718	0.0734698	0.646509	0.0798249	0.667789	0.0806605	0.672051	0.0810146	0.687087	0.0827838	0.696597	0.0829652	0.698039	0.0843647	0.703042	0.0842901	0.708149	0.084389	0.714684	0.085187	0.703251	0.0849403	0.701937	0.0859118	0.721278	0.0867802
		0.754892	0.0905734	19.4699	0.60885			0.38301	0.0514298	0.426778	0.0551913	0.425868	0.0553484	0.432306	0.0565496	0.449186	0.0584978	0.456689	0.0592275	0.465817	0.0606203	0.475744	0.0610794	0.597449	0.0737436	0.652108	0.0800864	0.672894	0.0809281	0.676712	0.0813335	0.692351	0.0830561	0.702936	0.0832485	0.702389	0.0846771	0.707698	0.0846031	0.712755	0.0846983	0.719273	0.0855209	0.709057	0.0852213	0.705543	0.0862286	0.725515	0.0871606
		0.762029	0.0918424	21.9902	0.638545			0.385857	0.0517567	0.429804	0.0554419	0.428539	0.0555863	0.435152	0.0567745	0.451535	0.0587392	0.459748	0.0594786	0.46905	0.0608459	0.478997	0.061432	0.600886	0.0740456	0.657267	0.0803918	0.677596	0.0812353	0.681004	0.0816875	0.6972	0.0833692	0.708777	0.0835797	0.706395	0.0850214	0.711985	0.0849509	0.716997	0.0850418	0.723499	0.0858877	0.714405	0.0855474	0.708863	0.086568	0.729416	0.0875655
		0.777839	0.0929925	24.8208	0.668788			0.388348	0.0520918	0.432454	0.05571	0.430879	0.0558385	0.437646	0.0570168	0.453591	0.0589898	0.462427	0.0597476	0.471881	0.0610923	0.481844	0.0617943	0.603895	0.0743641	0.661786	0.0807293	0.681716	0.0815706	0.684763	0.0820629	0.701447	0.0837112	0.713893	0.0839462	0.709904	0.0853845	0.71574	0.0853202	0.720712	0.0854064	0.7272	0.0862732	0.719091	0.0859058	0.711769	0.0869168	0.732831	0.0879794
		0.774678	0.0930107	28	0.69959			0.390388	0.0524225	0.434626	0.0559854	0.432796	0.0560955	0.439689	0.0572673	0.455276	0.05924	0.464622	0.0600243	0.474202	0.0613501	0.484176	0.0621524	0.606361	0.0746869	0.665492	0.0810861	0.685094	0.0819209	0.687844	0.0824452	0.704931	0.0840689	0.71809	0.0843338	0.712779	0.0857524	0.718819	0.0856968	0.723758	0.0857779	0.730233	0.0866627	0.722934	0.0862828	0.714151	0.0872617	0.735628	0.0883863
		0.781961	0.0941862	28	0.69959			0.391899	0.0527359	0.436237	0.0562576	0.434217	0.0563472	0.441205	0.0575163	0.456524	0.0594803	0.466251	0.060298	0.475925	0.0616094	0.485904	0.0624925	0.608189	0.0750016	0.668244	0.0814484	0.687601	0.0822729	0.69013	0.0828197	0.707516	0.0844285	0.721206	0.0847276	0.714911	0.086111	0.721102	0.0860663	0.726016	0.0861421	0.732482	0.0870411	0.725786	0.086664	0.715915	0.0875893	0.737701	0.0887707
		0.793192	0.0947876	IsoLine	IsoLine			0.392822	0.05302	0.437225	0.056516	0.435088	0.0565842	0.442135	0.0577542	0.457288	0.0597013	0.467249	0.0605582	0.476982	0.0618602	0.48696	0.0628015	0.60931	0.0752961	0.669934	0.0818022	0.689141	0.0826129	0.691531	0.0831722	0.709103	0.0847762	0.72312	0.0851125	0.716218	0.0864465	0.722501	0.0864144	0.727401	0.0864851	0.73386	0.0873939	0.727538	0.0870347	0.716995	0.0878871	0.73897	0.0891177
		0.803601	0.0950365					0.393122	0.053264	0.437551	0.0567507	0.435374	0.0567971	0.442443	0.057972	0.457538	0.0598946	0.467579	0.0607949	0.477333	0.0620929	0.487305	0.0630676	0.609679	0.075559	0.670498	0.0821341	0.689653	0.0829279	0.691994	0.0834889	0.709632	0.0850988	0.72376	0.0854738	0.716649	0.0867459	0.722964	0.0867277	0.72786	0.0867936	0.734315	0.0877076	0.728123	0.0873806	0.717349	0.0881437	0.739386	0.089414
		0.807678	0.0957884					ErrEll	ErrEll	ErrEll	ErrEll	ErrEll	ErrEll	ErrEll	ErrEll	ErrEll	ErrEll	ErrEll	ErrEll	ErrEll	ErrEll	ErrEll	ErrEll	ErrEll	ErrEll	ErrEll	ErrEll	ErrEll	ErrEll	ErrEll	ErrEll	ErrEll	ErrEll	ErrEll	ErrEll	ErrEll	ErrEll	ErrEll	ErrEll	ErrEll	ErrEll	ErrEll	ErrEll	ErrEll	ErrEll	ErrEll	ErrEll	ErrEll	ErrEll
		0.808405	0.0972278
		0.844661	0.0988403
		0.848715	0.099612
		0.861352	0.100425
		0.878939	0.10293
		0.873971	0.103487
		1.01226	0.113589
		1.41709	0.147276
		2.27559	0.20509
		2.94981	0.244852
		3.67587	0.286344
		3.85898	0.269775
		4.54715	0.307362
		4.51012	0.299063
		4.50472	0.297456
		4.85674	0.319368
		4.59811	0.296054
		5.25105	0.326977
		5.22213	0.322867
		5.30699	0.326475
		5.57715	0.343086
		5.2703	0.324059
		5.42132	0.324905
		5.9723	0.350783
		6.04844	0.349764
		6.14076	0.352101
		6.32216	0.361127
		6.65414	0.375842
		6.42051	0.359544
		6.3269	0.351696
		6.75204	0.372785
		9.80881	0.481017
		10.9504	0.473029
		11.5779	0.456453
		12.381	0.487276
		12.0808	0.470453
		13.0041	0.502883
		14.1273	0.537794
		13.8904	0.513373
		14.6112	0.516349
		17.0561	0.551497
		21.1636	0.607072
		22.8605	0.614019
		IsoLine	IsoLine
[truncated: 112 more columns]

## Sheet: PlotDat2
Source sheet	all data	0.37661	0.0519739	0	0	0.217708	0.0315113	0.393122	0.053264	0.437551	0.0567507	0.435374	0.0567971	0.442443	0.057972	0.457538	0.0598946	0.467579	0.0607949	0.477333	0.0620929	0.487305	0.0630676	0.609679	0.075559	0.670498	0.0821341	0.689653	0.0829279	0.691994	0.0834889	0.709632	0.0850988	0.72376	0.0854738	0.716649	0.0867459	0.722964	0.0867277	0.72786	0.0867936	0.734315	0.0877076	0.728123	0.0873806	0.717349	0.0881437	0.739386	0.089414
Plot name	Concordia0	0.420018	0.0559001	0.123123	0.0184575	0.482812	0.0640155	0.392787	0.0534583	0.437203	0.0569528	0.435066	0.056978	0.442117	0.0581612	0.457264	0.0600528	0.467228	0.0609989	0.476965	0.0622985	0.486925	0.0632806	0.609283	0.0757802	0.669915	0.0824311	0.68912	0.0832059	0.691501	0.0837578	0.709082	0.0853837	0.7231	0.0857975	0.716188	0.0869979	0.722473	0.0869942	0.727373	0.0870558	0.733829	0.0879701	0.727517	0.0876885	0.716963	0.0883492	0.738932	0.0896483
Plot Type	1	0.419893	0.0559609	0.261406	0.0372556	0.805631	0.097544	0.391831	0.0535956	0.436195	0.0571144	0.434175	0.0571198	0.441169	0.0583145	0.456478	0.0601697	0.466209	0.0611625	0.475892	0.0624692	0.485835	0.0634322	0.608137	0.0759514	0.668206	0.0826819	0.68756	0.0834361	0.690072	0.0839685	0.707474	0.08562	0.721167	0.0860711	0.714853	0.0871926	0.721046	0.0872038	0.725962	0.0872616	0.73242	0.0881712	0.725745	0.0879465	0.715853	0.0884957	0.737627	0.0898115
1st free col	163	0.425951	0.0572288	0.416715	0.0564008	1.19873	0.132129	0.39029	0.0536706	0.434566	0.0572293	0.432735	0.057217	0.439637	0.0584262	0.455209	0.0602408	0.464562	0.0612794	0.474155	0.0625983	0.484076	0.0635167	0.606286	0.0760658	0.665438	0.082877	0.685034	0.0836097	0.687761	0.084113	0.70487	0.0857987	0.718034	0.0862842	0.712695	0.0873227	0.718738	0.0873482	0.723678	0.0874031	0.730144	0.0883034	0.722874	0.0881447	0.71406	0.0885776	0.735521	0.0898973
Sigma Level	2	0.443918	0.0589799	0.591146	0.0758993	1.67741	0.167804	0.388224	0.0536804	0.432377	0.0572932	0.430801	0.0572659	0.437579	0.0584918	0.453506	0.0602636	0.46235	0.061345	0.471821	0.062681	0.481717	0.0635308	0.603799	0.0761191	0.661717	0.0830087	0.68164	0.08372	0.684657	0.0841856	0.701371	0.0859128	0.713822	0.0864286	0.709797	0.0873831	0.715637	0.087422	0.720611	0.0874748	0.727086	0.0883615	0.719015	0.0882755	0.711654	0.0885916	0.732693	0.0899025
Absolute Errs	FALSE	0.449857	0.0599462	0.787053	0.0957576	2.2603	0.204603	0.385711	0.0536246	0.429714	0.0573035	0.428449	0.0572647	0.435074	0.0585089	0.451434	0.060237	0.459658	0.0613569	0.468979	0.062714	0.478847	0.0634739	0.600773	0.0761092	0.657186	0.083072	0.677507	0.0837628	0.680879	0.0841836	0.697109	0.0859581	0.708692	0.0864988	0.70627	0.0873715	0.711864	0.0874223	0.716878	0.0874741	0.723366	0.0883432	0.714316	0.0883338	0.708727	0.0885374	0.729254	0.0898269
Symbol Type	1	0.458615	0.0613887	1.00708	0.115983	2.97009	0.242562	0.382848	0.0535054	0.426677	0.0572599	0.425767	0.0572134	0.432219	0.0584768	0.449074	0.060162	0.456589	0.0613145	0.465739	0.0626961	0.475578	0.0633483	0.597324	0.0760366	0.652018	0.0830644	0.672794	0.0837364	0.676573	0.084107	0.69225	0.0859327	0.702842	0.086492	0.70225	0.0872884	0.707563	0.0873492	0.712623	0.0874009	0.719125	0.0882493	0.708958	0.0883175	0.705392	0.0884169	0.725336	0.0896733
Inverse Plot	FALSE	0.468443	0.0616846	1.2542	0.136581	3.83441	0.281716	0.379746	0.0533273	0.423385	0.057164	0.42286	0.057114	0.429122	0.0583967	0.446516	0.0600417	0.453261	0.0612196	0.462226	0.0626279	0.472035	0.0631587	0.593585	0.0759039	0.646413	0.0829864	0.667683	0.0836418	0.671904	0.0839589	0.686981	0.0858376	0.696497	0.0864084	0.697891	0.0871369	0.702899	0.0872054	0.708008	0.087258	0.714527	0.0880834	0.703146	0.0882271	0.701776	0.0882349	0.721088	0.0894477
Color Plot	TRUE	0.589767	0.0744755	1.53175	0.157559	4.8869	0.322105	0.376523	0.0530972	0.419964	0.0570196	0.419838	0.0569703	0.425904	0.0582717	0.443858	0.0598805	0.449803	0.0610757	0.458573	0.0625122	0.468353	0.0629125	0.589699	0.0757164	0.640586	0.0828408	0.662369	0.0834828	0.667051	0.0837448	0.681502	0.0856765	0.689901	0.0862514	0.693361	0.0869229	0.698052	0.0869964	0.703212	0.087051	0.709748	0.0878519	0.697104	0.0880662	0.69802	0.0879982	0.716674	0.0891588
3D plot	FALSE	0.640635	0.0812291	1.84346	0.178925	6.16853	0.363766	0.373303	0.0528239	0.416544	0.0568321	0.416819	0.0567877	0.422688	0.0581067	0.441202	0.0596848	0.446347	0.0608885	0.454922	0.0623532	0.464675	0.0626191	0.585816	0.0754812	0.634762	0.0826333	0.657058	0.0832653	0.662201	0.083473	0.676026	0.0854556	0.683306	0.0860269	0.688834	0.0866545	0.693207	0.0867303	0.698419	0.0867878	0.704972	0.0875636	0.691064	0.0878408	0.694266	0.087716	0.712264	0.0888175
Linear	FALSE	0.662423	0.0819629	2.19356	0.200685	7.72917	0.40674	0.370211	0.052518	0.413258	0.0566088	0.413918	0.0565734	0.419597	0.057908	0.43865	0.0594619	0.443025	0.060665	0.451413	0.0621572	0.461142	0.0622898	0.582084	0.0752073	0.629162	0.0823718	0.651953	0.0829978	0.65754	0.0831541	0.670762	0.0851833	0.676966	0.0857436	0.684484	0.0863422	0.688551	0.0864174	0.693813	0.0864784	0.700383	0.0872297	0.685258	0.0875597	0.69066	0.0873991	0.708027	0.0884372
Data Range	AA3:AE79	0.667126	0.0822438	2.58676	0.222846	9.62957	0.451068	0.367364	0.0521912	0.410232	0.0563583	0.411246	0.0563356	0.41675	0.0576831	0.436301	0.0592205	0.439966	0.0604139	0.448181	0.0619316	0.457889	0.0619372	0.578648	0.0749053	0.624004	0.0820664	0.64725	0.0826905	0.653247	0.0828001	0.665913	0.0848702	0.671126	0.0854124	0.680478	0.0859979	0.684263	0.0860695	0.689571	0.0861349	0.696157	0.0868629	0.679909	0.0872337	0.68734	0.0870597	0.704126	0.0880322
Filled Symbols	TRUE	0.681557	0.0841197	3.02838	0.245417	11.9437	0.496793	0.364873	0.051856	0.407582	0.0560902	0.408907	0.0560833	0.414257	0.0574408	0.434245	0.0589699	0.437287	0.0601448	0.44535	0.0616852	0.455042	0.0615749	0.575639	0.0745868	0.619485	0.0817288	0.643131	0.0823553	0.649488	0.0824247	0.661666	0.0845283	0.666009	0.0850459	0.67697	0.0856348	0.680508	0.0857002	0.685856	0.0857704	0.692456	0.0864773	0.675224	0.0868753	0.684433	0.0867109	0.700712	0.0876184
ConcAge	FALSE	0.689951	0.084496	3.52436	0.268404	14.7617	0.543959	0.362833	0.0515253	0.40541	0.0558148	0.40699	0.0558264	0.412213	0.0571903	0.43256	0.0587197	0.435092	0.0598681	0.443028	0.0614274	0.45271	0.0612169	0.573173	0.074264	0.615778	0.081372	0.639752	0.0820049	0.646407	0.0820424	0.658182	0.0841706	0.661812	0.0846583	0.674094	0.0852669	0.67743	0.0853236	0.682811	0.0853989	0.689423	0.0860879	0.671381	0.0864982	0.682052	0.0863661	0.697914	0.0872114
ConcSwap	FALSE	0.693437	0.0855096	4.08142	0.291816	18.1931	0.592611	0.361322	0.0512119	0.403799	0.0555426	0.405569	0.0555746	0.410697	0.0569413	0.431312	0.0584794	0.433463	0.0595944	0.441306	0.0611681	0.450983	0.0608768	0.571344	0.0739493	0.613027	0.0810098	0.637245	0.081653	0.644122	0.0816679	0.655597	0.083811	0.658697	0.0842645	0.671962	0.0849083	0.675147	0.0849542	0.680552	0.0850346	0.687174	0.0857095	0.668529	0.0861171	0.680287	0.0860384	0.695841	0.0868271
1st Symbol-row	1	0.698124	0.0855102	4.70706	0.31566	22.3716	0.642797	0.360399	0.0509278	0.402811	0.0552842	0.404698	0.0553377	0.409768	0.0567034	0.430549	0.0582584	0.432465	0.0593343	0.440249	0.0609173	0.449926	0.0605677	0.570224	0.0736549	0.611337	0.0806559	0.635706	0.081313	0.642721	0.0813154	0.65401	0.0834632	0.656783	0.0838796	0.670655	0.0845728	0.673747	0.0846061	0.679167	0.0846917	0.685796	0.0853567	0.666776	0.0857464	0.679208	0.0857406	0.694572	0.0864801
		0.703284	0.0855884	5.40973	0.339943	27.4597	0.694563	0.360099	0.0506839	0.402485	0.0550495	0.404411	0.0551247	0.40946	0.0564856	0.430299	0.0580651	0.432135	0.0590976	0.439897	0.0606846	0.449581	0.0603016	0.569855	0.073392	0.610773	0.0803241	0.635193	0.0809979	0.642258	0.0809987	0.653481	0.0831407	0.656143	0.0835183	0.670224	0.0842734	0.673284	0.0842927	0.678709	0.0843832	0.685341	0.085043	0.666192	0.0854005	0.678854	0.085484	0.694157	0.0861837
		0.709828	0.0863753	6.19892	0.364675	IsoLine	IsoLine	0.360433	0.0504895	0.402833	0.0548474	0.404719	0.0549438	0.409786	0.0562964	0.430572	0.057907	0.432486	0.0588935	0.440265	0.060479	0.449961	0.0600886	0.57025	0.0731707	0.611356	0.0800271	0.635727	0.0807199	0.64275	0.0807298	0.654031	0.0828558	0.656802	0.0831946	0.670685	0.0840214	0.673776	0.0840262	0.679195	0.084121	0.685827	0.0847805	0.666797	0.0850926	0.679239	0.0852785	0.69461	0.0859495
		0.697157	0.0863905	7.08528	0.389864			0.361389	0.0503522	0.403841	0.0546858	0.405611	0.0548021	0.410733	0.0561431	0.431358	0.05779	0.433505	0.05873	0.441338	0.0603083	0.451052	0.059937	0.571396	0.0729995	0.613064	0.0797762	0.637287	0.0804897	0.64418	0.0805191	0.655639	0.0826195	0.658736	0.082921	0.67202	0.0838266	0.675203	0.0838167	0.680607	0.0839152	0.687236	0.0845793	0.66857	0.0848346	0.68035	0.085132	0.695915	0.0857863
		0.698101	0.0868139	8.08077	0.415517			0.36293	0.0502772	0.40547	0.0545709	0.407051	0.0547049	0.412265	0.0560314	0.432628	0.0577189	0.435152	0.0586131	0.443075	0.0601791	0.45281	0.0598525	0.573248	0.0728851	0.615833	0.0795812	0.639812	0.0803162	0.646491	0.0803746	0.658243	0.0824408	0.661869	0.0827079	0.674178	0.0836966	0.677511	0.0836722	0.68289	0.0837737	0.689513	0.0844472	0.67144	0.0846364	0.682143	0.0850502	0.698022	0.0857004
		0.716771	0.0877989	9.19882	0.441644			0.364997	0.0502674	0.407659	0.054507	0.408984	0.0546559	0.414323	0.0559658	0.43433	0.0576961	0.437364	0.0585475	0.44541	0.0600965	0.45517	0.0598384	0.575734	0.0728318	0.619554	0.0794495	0.643207	0.0802059	0.649595	0.080302	0.661742	0.0823266	0.666081	0.0825635	0.677076	0.0836361	0.680611	0.0835984	0.685957	0.0837019	0.69257	0.0843891	0.675299	0.0845056	0.684549	0.0850361	0.700849	0.0856952
		0.732805	0.0888446	10.4545	0.468253			0.36751	0.0503232	0.410322	0.0544967	0.411337	0.0546571	0.416828	0.0559487	0.436402	0.0577227	0.440056	0.0585356	0.448251	0.0600635	0.458039	0.0598953	0.57876	0.0728417	0.624085	0.0793862	0.64734	0.0801631	0.653372	0.080304	0.666004	0.0822814	0.671211	0.0824933	0.680603	0.0836477	0.684385	0.0835981	0.68969	0.0837027	0.696291	0.0844073	0.679998	0.0844472	0.687476	0.0850903	0.704288	0.0857709
		0.738104	0.0891313	11.8649	0.495353			0.370373	0.0504425	0.413359	0.0545403	0.414019	0.0547084	0.419684	0.0559808	0.438762	0.0577977	0.443125	0.0585779	0.451491	0.0600814	0.461308	0.0600209	0.582209	0.0729144	0.629253	0.0793937	0.652053	0.0801895	0.657679	0.0803806	0.670863	0.0823068	0.67706	0.0825001	0.684623	0.0837309	0.688686	0.0836713	0.693946	0.0837759	0.700532	0.0845012	0.685357	0.0844636	0.690811	0.0852108	0.708207	0.0859244
		0.733018	0.0894922	13.4488	0.522954			0.373475	0.0506205	0.416651	0.0546362	0.416926	0.0548078	0.42278	0.0560609	0.44132	0.057918	0.446453	0.0586729	0.455005	0.0601495	0.464852	0.0602105	0.585948	0.073047	0.634857	0.0794718	0.657164	0.080284	0.662348	0.0805287	0.676133	0.0824018	0.683405	0.0825837	0.688982	0.0838824	0.69335	0.0838151	0.69856	0.0839187	0.70513	0.0846671	0.691169	0.0845539	0.694427	0.0853929	0.712455	0.08615
		0.73612	0.0897518	15.2278	0.551064			0.376698	0.0508506	0.420072	0.0547806	0.419947	0.0549516	0.425998	0.0561858	0.443979	0.0580792	0.449911	0.0588167	0.458658	0.0602653	0.468533	0.0604567	0.589834	0.0732345	0.640684	0.0796174	0.662477	0.0804431	0.667201	0.0807428	0.681611	0.0825629	0.690002	0.0827407	0.693512	0.0840964	0.698197	0.084024	0.703356	0.0841258	0.709908	0.0848987	0.697211	0.0847149	0.698183	0.0856296	0.716868	0.086439
		0.740128	0.0900117	17.2258	0.579692			0.379918	0.0511239	0.423492	0.0549681	0.422967	0.0551341	0.429215	0.0563509	0.446634	0.0582749	0.453368	0.059004	0.462309	0.0604243	0.472211	0.0607501	0.593718	0.0734698	0.646509	0.0798249	0.667789	0.0806605	0.672051	0.0810146	0.687087	0.0827838	0.696597	0.0829652	0.698039	0.0843647	0.703042	0.0842901	0.708149	0.084389	0.714684	0.085187	0.703251	0.0849403	0.701937	0.0859118	0.721278	0.0867802
		0.754892	0.0905734	19.4699	0.60885			0.38301	0.0514298	0.426778	0.0551913	0.425868	0.0553484	0.432306	0.0565496	0.449186	0.0584978	0.456689	0.0592275	0.465817	0.0606203	0.475744	0.0610794	0.597449	0.0737436	0.652108	0.0800864	0.672894	0.0809281	0.676712	0.0813335	0.692351	0.0830561	0.702936	0.0832485	0.702389	0.0846771	0.707698	0.0846031	0.712755	0.0846983	0.719273	0.0855209	0.709057	0.0852213	0.705543	0.0862286	0.725515	0.0871606
		0.762029	0.0918424	21.9902	0.638545			0.385857	0.0517567	0.429804	0.0554419	0.428539	0.0555863	0.435152	0.0567745	0.451535	0.0587392	0.459748	0.0594786	0.46905	0.0608459	0.478997	0.061432	0.600886	0.0740456	0.657267	0.0803918	0.677596	0.0812353	0.681004	0.0816875	0.6972	0.0833692	0.708777	0.0835797	0.706395	0.0850214	0.711985	0.0849509	0.716997	0.0850418	0.723499	0.0858877	0.714405	0.0855474	0.708863	0.086568	0.729416	0.0875655
		0.777839	0.0929925	24.8208	0.668788			0.388348	0.0520918	0.432454	0.05571	0.430879	0.0558385	0.437646	0.0570168	0.453591	0.0589898	0.462427	0.0597476	0.471881	0.0610923	0.481844	0.0617943	0.603895	0.0743641	0.661786	0.0807293	0.681716	0.0815706	0.684763	0.0820629	0.701447	0.0837112	0.713893	0.0839462	0.709904	0.0853845	0.71574	0.0853202	0.720712	0.0854064	0.7272	0.0862732	0.719091	0.0859058	0.711769	0.0869168	0.732831	0.0879794
		0.774678	0.0930107	28	0.69959			0.390388	0.0524225	0.434626	0.0559854	0.432796	0.0560955	0.439689	0.0572673	0.455276	0.05924	0.464622	0.0600243	0.474202	0.0613501	0.484176	0.0621524	0.606361	0.0746869	0.665492	0.0810861	0.685094	0.0819209	0.687844	0.0824452	0.704931	0.0840689	0.71809	0.0843338	0.712779	0.0857524	0.718819	0.0856968	0.723758	0.0857779	0.730233	0.0866627	0.722934	0.0862828	0.714151	0.0872617	0.735628	0.0883863
		0.781961	0.0941862	28	0.69959			0.391899	0.0527359	0.436237	0.0562576	0.434217	0.0563472	0.441205	0.0575163	0.456524	0.0594803	0.466251	0.060298	0.475925	0.0616094	0.485904	0.0624925	0.608189	0.0750016	0.668244	0.0814484	0.687601	0.0822729	0.69013	0.0828197	0.707516	0.0844285	0.721206	0.0847276	0.714911	0.086111	0.721102	0.0860663	0.726016	0.0861421	0.732482	0.0870411	0.725786	0.086664	0.715915	0.0875893	0.737701	0.0887707
		0.793192	0.0947876	IsoLine	IsoLine			0.392822	0.05302	0.437225	0.056516	0.435088	0.0565842	0.442135	0.0577542	0.457288	0.0597013	0.467249	0.0605582	0.476982	0.0618602	0.48696	0.0628015	0.60931	0.0752961	0.669934	0.0818022	0.689141	0.0826129	0.691531	0.0831722	0.709103	0.0847762	0.72312	0.0851125	0.716218	0.0864465	0.722501	0.0864144	0.727401	0.0864851	0.73386	0.0873939	0.727538	0.0870347	0.716995	0.0878871	0.73897	0.0891177
		0.803601	0.0950365					0.393122	0.053264	0.437551	0.0567507	0.435374	0.0567971	0.442443	0.057972	0.457538	0.0598946	0.467579	0.0607949	0.477333	0.0620929	0.487305	0.0630676	0.609679	0.075559	0.670498	0.0821341	0.689653	0.0829279	0.691994	0.0834889	0.709632	0.0850988	0.72376	0.0854738	0.716649	0.0867459	0.722964	0.0867277	0.72786	0.0867936	0.734315	0.0877076	0.728123	0.0873806	0.717349	0.0881437	0.739386	0.089414
		0.807678	0.0957884					ErrEll	ErrEll	ErrEll	ErrEll	ErrEll	ErrEll	ErrEll	ErrEll	ErrEll	ErrEll	ErrEll	ErrEll	ErrEll	ErrEll	ErrEll	ErrEll	ErrEll	ErrEll	ErrEll	ErrEll	ErrEll	ErrEll	ErrEll	ErrEll	ErrEll	ErrEll	ErrEll	ErrEll	ErrEll	ErrEll	ErrEll	ErrEll	ErrEll	ErrEll	ErrEll	ErrEll	ErrEll	ErrEll	ErrEll	ErrEll	ErrEll	ErrEll
		0.808405	0.0972278
		0.844661	0.0988403
		0.848715	0.099612
		0.861352	0.100425
		0.878939	0.10293
		0.873971	0.103487
		1.01226	0.113589
		1.41709	0.147276
		2.27559	0.20509
		2.94981	0.244852
		3.67587	0.286344
		3.85898	0.269775
		4.54715	0.307362
		4.51012	0.299063
		4.50472	0.297456
		4.85674	0.319368
		4.59811	0.296054
		5.25105	0.326977
		5.22213	0.322867
		5.30699	0.326475
		5.57715	0.343086
		5.2703	0.324059
		5.42132	0.324905
		5.9723	0.350783
		6.04844	0.349764
		6.14076	0.352101
		6.32216	0.361127
		6.65414	0.375842
		6.42051	0.359544
		6.3269	0.351696
		6.75204	0.372785
		9.80881	0.481017
		10.9504	0.473029
		11.5779	0.456453
		12.381	0.487276
		12.0808	0.470453
		13.0041	0.502883
		14.1273	0.537794
		13.8904	0.513373
		14.6112	0.516349
		17.0561	0.551497
		21.1636	0.607072
		22.8605	0.614019
		IsoLine	IsoLine
[truncated: 112 more columns]

## Sheet: PlotDat3
Source sheet	all data	0	6.82343e-08	300	0	0	0
Plot name	ProbDens0	2.5	6.90661e-08	350	0	4997.5	0
Plot Type	16	5	6.99069e-08	350	1
1st free col	9	7.5	7.07569e-08	300	1
Sigma Level	2	10	7.16162e-08	300	0
Absolute Errs	FALSE	12.5	7.24847e-08	ErrBox	ErrBox
Symbol Type	1	15	7.33627e-08	350	0
Inverse Plot	FALSE	17.5	7.42501e-08	400	0
Color Plot	TRUE	20	7.51472e-08	400	7
3D plot	FALSE	22.5	7.60539e-08	350	7
Linear	FALSE	25	7.69703e-08	350	0
Data Range	BG5:BH81	27.5	7.78966e-08	ErrBox	ErrBox
Filled Symbols	FALSE	30	7.88329e-08	450	0
ConcAge	FALSE	32.5	7.97791e-08	500	0
ConcSwap	FALSE	35	8.07355e-08	500	1
1st Symbol-row	1	37.5	8.17021e-08	450	1
		40	8.2679e-08	450	0
		42.5	8.36663e-08	ErrBox	ErrBox
		45	8.46641e-08	500	0
		47.5	8.56724e-08	550	0
		50	8.66915e-08	550	13
		52.5	8.77213e-08	500	13
		55	8.87619e-08	500	0
		57.5	8.98136e-08	ErrBox	ErrBox
		60	9.08763e-08	550	0
		62.5	9.19501e-08	600	0
		65	9.30353e-08	600	13
		67.5	9.41317e-08	550	13
		70	9.52397e-08	550	0
		72.5	9.63592e-08	ErrBox	ErrBox
		75	9.74903e-08	600	0
		77.5	9.86332e-08	650	0
		80	9.9788e-08	650	5
		82.5	1.00955e-07	600	5
		85	1.02134e-07	600	0
		87.5	1.03325e-07	ErrBox	ErrBox
		90	1.04528e-07	650	0
		92.5	1.05744e-07	700	0
		95	1.06972e-07	700	1
		97.5	1.08212e-07	650	1
		100	1.09466e-07	650	0
		102.5	1.10732e-07	ErrBox	ErrBox
		105	1.12011e-07	850	0
		107.5	1.13304e-07	900	0
		110	1.14609e-07	900	1
		112.5	1.15928e-07	850	1
		115	1.1726e-07	850	0
		117.5	1.18605e-07	ErrBox	ErrBox
		120	1.19964e-07	1200	0
		122.5	1.21337e-07	1250	0
		125	1.22724e-07	1250	1
		127.5	1.24124e-07	1200	1
		130	1.25539e-07	1200	0
		132.5	1.26968e-07	ErrBox	ErrBox
		135	1.28411e-07	1350	0
		137.5	1.29868e-07	1400	0
		140	1.3134e-07	1400	1
		142.5	1.32827e-07	1350	1
		145	1.34328e-07	1350	0
		147.5	1.35845e-07	ErrBox	ErrBox
		150	1.37376e-07	1450	0
		152.5	1.38922e-07	1500	0
		155	1.40484e-07	1500	1
		157.5	1.42061e-07	1450	1
		160	1.43653e-07	1450	0
		162.5	1.45262e-07	ErrBox	ErrBox
		165	1.46885e-07	1650	0
		167.5	1.48525e-07	1700	0
		170	1.50181e-07	1700	1
		172.5	1.51853e-07	1650	1
		175	1.53541e-07	1650	0
		177.5	1.55246e-07	ErrBox	ErrBox
		180	1.56967e-07	1750	0
		182.5	1.71943e-07	1800	0
		185	1.74101e-07	1800	3
		187.5	1.76287e-07	1750	3
		190	1.78501e-07	1750	0
		192.5	1.80745e-07	ErrBox	ErrBox
		195	1.83019e-07	1800	0
		197.5	1.85322e-07	1850	0
		200	1.87656e-07	1850	2
		202.5	1.90021e-07	1800	2
		205	1.92418e-07	1800	0
		207.5	1.94846e-07	ErrBox	ErrBox
		210	1.97307e-07	1900	0
		212.5	1.998e-07	1950	0
		215	2.02327e-07	1950	5
		217.5	2.04888e-07	1900	5
		220	2.07484e-07	1900	0
		222.5	2.10114e-07	ErrBox	ErrBox
		225	2.1278e-07	1950	0
		227.5	2.15481e-07	2000	0
		230	2.1822e-07	2000	1
		232.5	2.20995e-07	1950	1
		235	2.23809e-07	1950	0
		237.5	2.2666e-07	ErrBox	ErrBox
		240	2.29551e-07	2000	0
		242.5	2.32481e-07	2050	0
		245	2.35452e-07	2050	3
		247.5	2.38463e-07	2000	3
		250	2.41515e-07	2000	0
		252.5	2.4461e-07	ErrBox	ErrBox
		255	2.47747e-07	2050	0
		257.5	2.50928e-07	2100	0
		260	2.54152e-07	2100	3
		262.5	2.57422e-07	2050	3
		265	2.83569e-07	2050	0
		267.5	3.13435e-07	ErrBox	ErrBox
		270	3.70767e-07	2100	0
		272.5	4.80301e-07	2150	0
		275	6.85528e-07	2150	2
		277.5	1.05984e-06	2100	2
		280	1.72194e-06	2100	0
		282.5	2.85537e-06	ErrBox	ErrBox
		285	4.73107e-06	2300	0
		287.5	7.72924e-06	2350	0
		290	1.23682e-05	2350	1
		292.5	1.92533e-05	2300	1
		295	2.91591e-05	2300	0
		297.5	4.28298e-05	ErrBox	ErrBox
		300	6.10491e-05	2500	0
		302.5	8.43773e-05	2550	0
		305	0.000113105	2550	1
		307.5	0.000147127	2500	1
		310	0.000185784	2500	0
		312.5	0.000228032	ErrBox	ErrBox
		315	0.000272544	2650	0
		317.5	0.000318103	2700	0
		320	0.000363873	2700	2
		322.5	0.000410034	2650	2
		325	0.000458018	2650	0
		327.5	0.000510634	ErrBox	ErrBox
		330	0.000571734	2700	0
		332.5	0.000645575	2750	0
		335	0.000735757	2750	3
		337.5	0.000844089	2700	3
		340	0.000969634	2700	0
		342.5	0.00110827	ErrBox	ErrBox
		345	0.00125297	2750	0
		347.5	0.00139483	2800	0
		350	0.00152459	2800	1
		352.5	0.00163434	2750	1
		355	0.00171881	2750	0
		357.5	0.00177602	ErrBox	ErrBox
		360	0.00180701	2850	0
		362.5	0.00181494	2900	0
		365	0.00180384	2900	1
		367.5	0.00177731	2850	1
		370	0.00173774	2850	0
		372.5	0.00168605	ErrBox	ErrBox
		375	0.00162196	3000	0
		377.5	0.00154464	3050	0
		380	0.00145348	3050	1
		382.5	0.00134873	3000	1
		385	0.00123189	3000	0
		387.5	0.00110578	ErrBox	ErrBox
		390	0.000974293	3200	0
		392.5	0.000841971	3250	0
		395	0.000713447	3250	1
		397.5	0.000592876	3200	1
		400	0.000483546	3200	0
		402.5	0.00038758	ErrBox	ErrBox
		405	0.000305991	3300	0
		407.5	0.000238665	3350	0
		410	0.000184797	3350	1
		412.5	0.000143034	3300	1
		415	0.000111816	3300	0
		417.5	8.96391e-05	ErrBox	ErrBox
		420	7.51816e-05
		422.5	6.73805e-05
		425	6.5341e-05
		427.5	6.84112e-05
		430	7.61428e-05
		432.5	8.81723e-05
		435	0.000104225
		437.5	0.000123917
		440	0.000146948
		442.5	0.000172923
		445	0.000201425
		447.5	0.000231979
		450	0.00026413
		452.5	0.000297487
		455	0.000331747
		457.5	0.000366816
		460	0.000402781
		462.5	0.000440026
		465	0.000479112
		467.5	0.000520972
		470	0.000566689
		472.5	0.000617519
		475	0.000674782
		477.5	0.000739804
		480	0.000813774
		482.5	0.000897695
		485	0.000992192
		487.5	0.0010976
		490	0.00121382
		492.5	0.00134036
		495	0.00147632
		497.5	0.00162043
		500	0.00177113
		502.5	0.00192659
		505	0.00208483
		507.5	0.00224374
		510	0.0024012
		512.5	0.00255511
		515	0.00270346
		517.5	0.00284438
		520	0.00297618
		522.5	0.00309735
		525	0.00320662
		527.5	0.00330299
		530	0.00338568
		532.5	0.0034542
		535	0.00350829
		537.5	0.00354795
		540	0.00357343
		542.5	0.00358519
		545	0.00358389
		547.5	0.00357034
		550	0.00354552
		552.5	0.00351046
		555	0.0034663
		557.5	0.00341417
		560	0.00335519
		562.5	0.00329045
		565	0.00322095
		567.5	0.00314763
		570	0.00307127
		572.5	0.00299257
		575	0.00291211
		577.5	0.00283034
		580	0.00274761
		582.5	0.00266419
		585	0.00258027
		587.5	0.00249598
		590	0.00241143
		592.5	0.0023267
		595	0.00224186
		597.5	0.002157
		600	0.00207223
		602.5	0.00198764
		605	0.0019034
		607.5	0.00181969
		610	0.0017367
		612.5	0.00165465
		615	0.00157377
		617.5	0.00149427
		620	0.00141643
		622.5	0.00134045
		625	0.00126655
		627.5	0.00119495
		630	0.00112582
		632.5	0.00105932
		635	0.000995564
		637.5	0.000934635
		640	0.000876649
		642.5	0.000821652
		645	0.000769634
		647.5	0.000720563
		650	0.000674457
		652.5	0.00063122
		655	0.000590803
		657.5	0.0005531
		660	0.000518009
		662.5	0.000485413
		665	0.000455157
		667.5	0.000427173
		670	0.000401302
		672.5	0.000377393
		675	0.000355307
		677.5	0.000334906
		680	0.000316056
		682.5	0.000298622
		685	0.000282467
		687.5	0.000267471
		690	0.000253554
		692.5	0.000240576
		695	0.000228425
		697.5	0.000217038
		700	0.000206314
		702.5	0.000196178
		705	0.000186564
		707.5	0.000177405
		710	0.000168674
		712.5	0.000160295
		715	0.000152284
		717.5	0.000144584
		720	0.000137168
		722.5	0.000130031
		725	0.000123179
		727.5	0.000116593
		730	0.000110261
		732.5	0.000104211
		735	9.84222e-05
		737.5	9.29378e-05
		740	8.77242e-05
		742.5	8.28018e-05
		745	7.81777e-05
		747.5	7.38582e-05
		750	6.98484e-05
		752.5	6.6165e-05
		755	6.27845e-05
		757.5	5.972e-05
		760	5.69586e-05
		762.5	5.45236e-05
		765	5.23817e-05
		767.5	5.05555e-05
		770	4.90199e-05
		772.5	4.77659e-05
		775	4.6783e-05
		777.5	4.60597e-05
		780	4.55834e-05
		782.5	4.53289e-05
		785	4.53098e-05
		787.5	4.54959e-05
		790	4.58731e-05
		792.5	4.64272e-05
		795	4.7144e-05
		797.5	4.80095e-05
		800	4.90101e-05
		802.5	5.01322e-05
		805	5.13628e-05
		807.5	5.26894e-05
		810	5.40998e-05
		812.5	5.55824e-05
		815	5.71149e-05
		817.5	5.87112e-05
		820	6.03471e-05
		822.5	6.20129e-05
		825	6.36994e-05
		827.5	6.53977e-05
		830	6.70996e-05
		832.5	6.87969e-05
		835	7.0482e-05
		837.5	7.21476e-05
		840	7.37866e-05
		842.5	7.53925e-05
		845	7.69587e-05
		847.5	7.84794e-05
		850	7.99487e-05
		852.5	8.13613e-05
		855	8.2712e-05
		857.5	8.39961e-05
		860	8.5209e-05
		862.5	8.63468e-05
		865	8.74055e-05
		867.5	8.83817e-05
		870	8.92622e-05
		872.5	9.00671e-05
		875	9.07809e-05
		877.5	9.14017e-05
		880	9.19281e-05
		882.5	9.2359e-05
		885	9.26938e-05
		887.5	9.2932e-05
		890	9.30739e-05
		892.5	9.31197e-05
		895	9.30706e-05
		897.5	9.29275e-05
		900	9.26922e-05
		902.5	9.23667e-05
		905	9.19532e-05
		907.5	9.14674e-05
		910	9.08872e-05
		912.5	9.02281e-05
		915	8.94934e-05
		917.5	8.86871e-05
		920	8.78133e-05
		922.5	8.6876e-05
		925	8.58932e-05
		927.5	8.48433e-05
		930	8.37436e-05
		932.5	8.25992e-05
		935	8.14148e-05
		937.5	8.01953e-05
		940	7.89458e-05
		942.5	7.7671e-05
		945	7.6376e-05
		947.5	7.50656e-05
		950	7.37445e-05
		952.5	7.24173e-05
		955	7.10887e-05
		957.5	6.97629e-05
		960	6.84442e-05
		962.5	6.71367e-05
		965	6.58442e-05
		967.5	6.45703e-05
		970	6.33185e-05
		972.5	6.2092e-05
		975	6.08938e-05
		977.5	5.97265e-05
		980	5.85928e-05
		982.5	5.74948e-05
		985	5.64346e-05
		987.5	5.54139e-05
		990	5.44475e-05
		992.5	5.35109e-05
		995	5.26178e-05
		997.5	5.1769e-05
		1000	5.09652e-05
		1002.5	5.02067e-05
		1005	4.9494e-05
		1007.5	4.88269e-05
		1010	4.82054e-05
		1012.5	4.76292e-05
		1015	4.70978e-05
		1017.5	4.66108e-05
		1020	4.61673e-05
		1022.5	4.57665e-05
		1025	4.54076e-05
		1027.5	4.50895e-05
		1030	4.48111e-05
		1032.5	4.45713e-05
		1035	4.43688e-05
		1037.5	4.42023e-05
		1040	4.40706e-05
		1042.5	4.39723e-05
		1045	4.3906e-05
		1047.5	4.38704e-05
		1050	4.38775e-05
		1052.5	4.38997e-05
		1055	4.39485e-05
		1057.5	4.40225e-05
		1060	4.41204e-05
		1062.5	4.42409e-05
		1065	4.43828e-05
		1067.5	4.45448e-05
		1070	4.47258e-05
		1072.5	4.49245e-05
		1075	4.51399e-05
		1077.5	4.5371e-05
		1080	4.56166e-05
		1082.5	4.5889e-05
		1085	4.61614e-05
		1087.5	4.64456e-05
		1090	4.67408e-05
		1092.5	4.70462e-05
		1095	4.7361e-05
		1097.5	4.76846e-05
		1100	4.80163e-05
		1102.5	4.83556e-05
		1105	4.87017e-05
		1107.5	4.90543e-05
		1110	4.94128e-05
		1112.5	4.97767e-05
		1115	5.01458e-05
		1117.5	5.05325e-05
		1120	5.09111e-05
		1122.5	5.12937e-05
		1125	5.16935e-05
		1127.5	5.20842e-05
		1130	5.24782e-05
		1132.5	5.28752e-05
		1135	5.32751e-05
		1137.5	5.36778e-05
		1140	5.40965e-05
		1142.5	5.45048e-05
		1145	5.49155e-05
		1147.5	5.53285e-05
		1150	5.57437e-05
		1152.5	5.6161e-05
		1155	5.65803e-05
		1157.5	5.70017e-05
		1160	5.74251e-05
		1162.5	5.78504e-05
		1165	5.82777e-05
		1167.5	5.87202e-05
		1170	5.91521e-05
		1172.5	5.9573e-05
		1175	6.00106e-05
		1177.5	6.04636e-05
		1180	6.09055e-05
		1182.5	6.13494e-05
		1185	6.17954e-05
		1187.5	6.22433e-05
		1190	6.26935e-05
		1192.5	6.31458e-05
		1195	6.36003e-05
		1197.5	6.40572e-05
		1200	6.45165e-05
		1202.5	6.49912e-05
		1205	6.54562e-05
		1207.5	6.59238e-05
		1210	6.6394e-05
		1212.5	6.68671e-05
		1215	6.73429e-05
		1217.5	6.78217e-05
		1220	6.83034e-05
		1222.5	6.87882e-05
		1225	6.9276e-05
		1227.5	6.9767e-05
		1230	7.02613e-05
		1232.5	7.07588e-05
		1235	7.12597e-05
		1237.5	7.1764e-05
		1240	7.22718e-05
		1242.5	7.27831e-05
		1245	7.32981e-05
		1247.5	7.38166e-05
		1250	7.43389e-05
		1252.5	7.4865e-05
		1255	7.53948e-05
		1257.5	7.59285e-05
		1260	7.64661e-05
		1262.5	7.70077e-05
		1265	7.75533e-05
		1267.5	7.81029e-05
		1270	7.86566e-05
		1272.5	7.92143e-05
		1275	7.97763e-05
		1277.5	8.03558e-05
		1280	8.09268e-05
		1282.5	8.15019e-05
		1285	8.20813e-05
		1287.5	8.26651e-05
		1290	8.32531e-05
		1292.5	8.38455e-05
		1295	8.44422e-05
		1297.5	8.50564e-05
		1300	8.56625e-05
		1302.5	8.6273e-05
		1305	8.68879e-05
		1307.5	8.75072e-05
		1310	8.81309e-05
		1312.5	8.87589e-05
		1315	8.93913e-05
		1317.5	9.00281e-05
		1320	9.06692e-05
		1322.5	9.13147e-05
		1325	9.19644e-05
		1327.5	9.26184e-05
		1330	9.32767e-05
		1332.5	9.39391e-05
		1335	9.46058e-05
		1337.5	9.52766e-05
		1340	9.59516e-05
		1342.5	9.66306e-05
		1345	9.73137e-05
		1347.5	9.80008e-05
		1350	9.86918e-05
		1352.5	9.93868e-05
		1355	0.000100086
		1357.5	0.000100788
		1360	0.000101495
		1362.5	0.000102205
		1365	0.000102919
		1367.5	0.00010365
		1370	0.000104372
		1372.5	0.000105097
		1375	0.000105826
		1377.5	0.000106558
		1380	0.000107294
		1382.5	0.000108033
		1385	0.000108776
		1387.5	0.000109522
		1390	0.000110271
		1392.5	0.000111023
		1395	0.000111778
		1397.5	0.000112537
		1400	0.000113299
		1402.5	0.000114063
		1405	0.000114831
		1407.5	0.000115602
		1410	0.000116375
		1412.5	0.000117152
		1415	0.000117931
		1417.5	0.000118714
		1420	0.000119499
		1422.5	0.000120288
		1425	0.000121079
		1427.5	0.000121873
		1430	0.00012267
		1432.5	0.000123469
		1435	0.000124272
		1437.5	0.000125078
		1440	0.000125886
		1442.5	0.000126698
		1445	0.000127512
		1447.5	0.00012833
		1450	0.000129151
		1452.5	0.000129975
		1455	0.000130802
		1457.5	0.000131632
		1460	0.000132466
		1462.5	0.000133303
		1465	0.000134157
		1467.5	0.000135002
		1470	0.000135851
		1472.5	0.000136703
		1475	0.000137559
		1477.5	0.00013842
		1480	0.000139298
		1482.5	0.000140168
		1485	0.000141042
		1487.5	0.00014192
		1490	0.000142804
		1492.5	0.000143692
		1495	0.000144585
		1497.5	0.000145483
		1500	0.000146387
		1502.5	0.000147296
		1505	0.000148211
		1507.5	0.000149131
		1510	0.000150058
		1512.5	0.00015099
		1515	0.000151929
		1517.5	0.000152875
		1520	0.000153827
		1522.5	0.000154786
		1525	0.000155752
		1527.5	0.000156726
		1530	0.000157707
		1532.5	0.000158696
		1535	0.000159693
		1537.5	0.000160698
		1540	0.000161711
		1542.5	0.000162733
		1545	0.000163764
		1547.5	0.000164804
		1550	0.000165853
		1552.5	0.000166911
		1555	0.000167979
		1557.5	0.000169056
		1560	0.000170144
		1562.5	0.000171242
		1565	0.000172351
		1567.5	0.00017347
		1570	0.000174599
		1572.5	0.00017574
		1575	0.000176892
		1577.5	0.000178056
		1580	0.000179231
		1582.5	0.000180418
		1585	0.000181617
		1587.5	0.000182827
		1590	0.00018405
		1592.5	0.000185286
		1595	0.000186534
		1597.5	0.000187795
		1600	0.000189068
		1602.5	0.000190355
		1605	0.000191654
		1607.5	0.000192967
		1610	0.000194293
		1612.5	0.000195632
		1615	0.000196985
		1617.5	0.000198351
		1620	0.000199731
		1622.5	0.000201125
		1625	0.000202532
		1627.5	0.000203953
		1630	0.000205388
		1632.5	0.000206837
		1635	0.000208299
		1637.5	0.000209775
		1640	0.000211265
		1642.5	0.000212769
		1645	0.000214287
		1647.5	0.000215818
		1650	0.000217363
		1652.5	0.000218921
		1655	0.000220493
		1657.5	0.000222078
		1660	0.000223677
		1662.5	0.000225289
		1665	0.000226914
		1667.5	0.000228551
		1670	0.000230202
		1672.5	0.000231865
		1675	0.000233541
		1677.5	0.000235229
		1680	0.000236929
		1682.5	0.000238641
		1685	0.000240365
		1687.5	0.0002421
		1690	0.000243846
		1692.5	0.000245603
		1695	0.000247371
		1697.5	0.00024915
		1700	0.000250939
		1702.5	0.000252737
		1705	0.000254545
		1707.5	0.000256363
		1710	0.00025819
		1712.5	0.000260025
		1715	0.000261868
		1717.5	0.00026372
		1720	0.000265579
		1722.5	0.000267445
		1725	0.000269318
		1727.5	0.000271198
		1730	0.000273084
		1732.5	0.000274976
		1735	0.000276873
		1737.5	0.000278775
		1740	0.000280681
		1742.5	0.000282592
		1745	0.000284506
		1747.5	0.000286423
		1750	0.000288343
		1752.5	0.000290266
		1755	0.000292203
		1757.5	0.00029413
		1760	0.000296057
		1762.5	0.000297998
		1765	0.000299927
		1767.5	0.000301855
		1770	0.000303782
		1772.5	0.000305708
		1775	0.000307632
		1777.5	0.000309553
		1780	0.000311472
		1782.5	0.0003134
		1785	0.000315311
		1787.5	0.000317218
		1790	0.00031912
		1792.5	0.000321017
		1795	0.000322907
		1797.5	0.000324791
		1800	0.000326668
		1802.5	0.000328537
		1805	0.000330398
		1807.5	0.00033225
		1810	0.000334093
		1812.5	0.000335926
		1815	0.000337749
		1817.5	0.000339561
		1820	0.000341361
		1822.5	0.000343162
		1825	0.000344939
		1827.5	0.000346715
		1830	0.000348465
		1832.5	0.000350201
		1835	0.000351935
		1837.5	0.000353642
		1840	0.000355332
		1842.5	0.000357006
		1845	0.000358663
		1847.5	0.000360303
		1850	0.000361925
		1852.5	0.000363528
		1855	0.000365112
		1857.5	0.000366676
		1860	0.00036822
		1862.5	0.000369743
		1865	0.000371245
		1867.5	0.000372725
		1870	0.000374183
		1872.5	0.000375617
		1875	0.000377028
		1877.5	0.000378415
		1880	0.000379778
		1882.5	0.000381115
		1885	0.000382427
		1887.5	0.000383713
		1890	0.000384986
		1892.5	0.000386218
		1895	0.000387424
		1897.5	0.000388601
		1900	0.000389749
		1902.5	0.000390869
		1905	0.000391959
		1907.5	0.000393019
		1910	0.000394048
		1912.5	0.000395047
		1915	0.000396014
		1917.5	0.000396949
		1920	0.000397852
		1922.5	0.000398723
		1925	0.00039956
		1927.5	0.000400363
		1930	0.000401133
		1932.5	0.000401869
		1935	0.000402569
		1937.5	0.000403235
		1940	0.000403865
		1942.5	0.000404459
		1945	0.000405018
		1947.5	0.000405539
		1950	0.000406025
		1952.5	0.000406473
		1955	0.000406883
		1957.5	0.000407256
		1960	0.000407591
		1962.5	0.000407888
		1965	0.000408147
		1967.5	0.000408367
		1970	0.000408549
		1972.5	0.000408691
		1975	0.000408794
		1977.5	0.000408858
		1980	0.000408883
		1982.5	0.000408868
		1985	0.000408814
		1987.5	0.00040872
		1990	0.000408586
		1992.5	0.000408412
		1995	0.000408198
		1997.5	0.000407945
		2000	0.000407652
		2002.5	0.000407319
		2005	0.000406946
		2007.5	0.000406533
		2010	0.000406081
		2012.5	0.00040559
		2015	0.000405059
		2017.5	0.000404489
		2020	0.000403867
		2022.5	0.000403219
		2025	0.000402533
		2027.5	0.000401808
		2030	0.000401046
		2032.5	0.000400245
		2035	0.000399406
		2037.5	0.000398544
		2040	0.000397632
		2042.5	0.000396683
		2045	0.000395698
		2047.5	0.000394678
		2050	0.000393621
		2052.5	0.00039253
		2055	0.000391404
		2057.5	0.000390244
		2060	0.000389051
		2062.5	0.000387824
		2065	0.000386565
		2067.5	0.000385273
		2070	0.00038395
		2072.5	0.000382596
		2075	0.0003812
		2077.5	0.000379787
		2080	0.000378344
		2082.5	0.000376873
		2085	0.000375374
		2087.5	0.000373848
		2090	0.000372295
		2092.5	0.000370716
		2095	0.000369112
		2097.5	0.000367484
		2100	0.000365832
		2102.5	0.000364157
		2105	0.000362459
		2107.5	0.00036074
		2110	0.000359
		2112.5	0.00035724
		2115	0.000355461
		2117.5	0.000353663
		2120	0.000351847
		2122.5	0.000350015
		2125	0.000348166
		2127.5	0.000346303
		2130	0.000344424
		2132.5	0.000342532
		2135	0.000340627
		2137.5	0.000338709
		2140	0.000336781
		2142.5	0.000334842
		2145	0.000332893
		2147.5	0.000330935
		2150	0.000328969
		2152.5	0.000326995
		2155	0.000325016
		2157.5	0.00032303
		2160	0.000321039
		2162.5	0.000319044
		2165	0.000317045
		2167.5	0.000315044
		2170	0.000313041
		2172.5	0.000311037
		2175	0.000309032
		2177.5	0.000307027
		2180	0.000305023
		2182.5	0.000303021
		2185	0.000301021
		2187.5	0.000299024
		2190	0.000297031
		2192.5	0.000295043
		2195	0.000293059
		2197.5	0.000291081
		2200	0.000289109
		2202.5	0.000287144
		2205	0.000285186
		2207.5	0.000283237
		2210	0.000281296
		2212.5	0.000279364
		2215	0.000277442
		2217.5	0.00027553
		2220	0.000273643
		2222.5	0.000271754
		2225	0.000269877
		2227.5	0.000268012
		2230	0.00026616
		2232.5	0.000264321
		2235	0.000262496
		2237.5	0.000260685
		2240	0.000258888
		2242.5	0.000257106
		2245	0.000255339
		2247.5	0.000253587
		2250	0.000251852
		2252.5	0.000250132
		2255	0.00024843
		2257.5	0.000246743
		2260	0.000245074
		2262.5	0.000243423
		2265	0.000241789
		2267.5	0.000240172
		2270	0.000238574
		2272.5	0.000236994
		2275	0.000235433
		2277.5	0.00023389
		2280	0.000232366
		2282.5	0.000230862
		2285	0.000229376
		2287.5	0.00022791
		2290	0.000226464
		2292.5	0.000225037
		2295	0.00022363
		2297.5	0.000222243
		2300	0.000220875
		2302.5	0.000219528
		2305	0.000218201
		2307.5	0.000216895
		2310	0.000215608
		2312.5	0.000214342
		2315	0.000213097
		2317.5	0.000211872
		2320	0.000210668
		2322.5	0.000209484
		2325	0.00020832
		2327.5	0.000207178
		2330	0.000206056
		2332.5	0.000204955
		2335	0.000203874
		2337.5	0.000202814
		2340	0.000201775
		2342.5	0.000200756
		2345	0.000199758
		2347.5	0.000198781
		2350	0.000197824
		2352.5	0.000196888
		2355	0.000195973
		2357.5	0.000195078
		2360	0.000194203
		2362.5	0.000193349
		2365	0.000192516
		2367.5	0.000191703
		2370	0.00019091
		2372.5	0.000190138
		2375	0.000189386
		2377.5	0.000188655
		2380	0.000187943
		2382.5	0.000187252
		2385	0.000186581
		2387.5	0.000185929
		2390	0.000185298
		2392.5	0.000184687
		2395	0.000184096
		2397.5	0.000183524
		2400	0.000182973
		2402.5	0.000182441
		2405	0.000181928
		2407.5	0.000181436
		2410	0.000180962
		2412.5	0.000180509
		2415	0.000180074
		2417.5	0.000179659
		2420	0.000179263
		2422.5	0.000178886
		2425	0.000178528
		2427.5	0.00017819
		2430	0.00017787
		2432.5	0.000177568
		2435	0.000177286
		2437.5	0.000177022
		2440	0.000176777
		2442.5	0.00017655
		2445	0.000176341
		2447.5	0.00017615
		2450	0.000175978
		2452.5	0.000175823
		2455	0.000175674
		2457.5	0.000175555
		2460	0.000175455
		2462.5	0.000175371
		2465	0.000175305
		2467.5	0.000175256
		2470	0.000175224
		2472.5	0.000175209
		2475	0.000175211
		2477.5	0.000175229
		2480	0.000175263
		2482.5	0.000175313
		2485	0.00017538
		2487.5	0.000175462
		2490	0.00017556
		2492.5	0.000175673
		2495	0.000175802
		2497.5	0.000175945
		2500	0.000176104
		2502.5	0.000176277
		2505	0.000176464
		2507.5	0.000176665
		2510	0.00017688
		2512.5	0.000177108
		2515	0.00017735
		2517.5	0.000177605
		2520	0.000177873
		2522.5	0.000178153
		2525	0.000178445
		2527.5	0.000178749
		2530	0.000179078
		2532.5	0.000179405
		2535	0.000179744
		2537.5	0.000180093
		2540	0.000180453
		2542.5	0.000180822
		2545	0.000181201
		2547.5	0.000181589
		2550	0.000181986
		2552.5	0.000182391
		2555	0.000182804
		2557.5	0.000183212
		2560	0.000183641
		2562.5	0.000184076
		2565	0.000184518
		2567.5	0.000184965
		2570	0.000185418
		2572.5	0.000185876
		2575	0.000186339
		2577.5	0.000186806
		2580	0.000187276
		2582.5	0.00018775
		2585	0.000188226
		2587.5	0.000188704
		2590	0.000189185
		2592.5	0.000189666
		2595	0.000190148
		2597.5	0.00019063
		2600	0.000191112
		2602.5	0.000191593
		2605	0.000192073
		2607.5	0.00019255
		2610	0.000193025
		2612.5	0.000193498
		2615	0.000193966
		2617.5	0.000194431
		2620	0.000194878
		2622.5	0.000195333
		2625	0.000195783
		2627.5	0.000196226
		2630	0.000196663
		2632.5	0.000197092
		2635	0.000197513
		2637.5	0.000197914
		2640	0.000198318
		2642.5	0.000198713
		2645	0.000199098
		2647.5	0.000199459
		2650	0.000199823
		2652.5	0.000200175
		2655	0.000200515
		2657.5	0.000200829
		2660	0.000201143
		2662.5	0.000201444
		2665	0.00020173
		2667.5	0.000202001
		2670	0.000202245
		2672.5	0.000202486
		2675	0.000202711
		2677.5	0.000202919
		2680	0.00020311
		2682.5	0.000203284
		2685	0.00020344
		2687.5	0.000203578
		2690	0.000203684
		2692.5	0.000203785
		2695	0.000203866
		2697.5	0.000203928
		2700	0.000203969
		2702.5	0.00020399
		2705	0.000203991
		2707.5	0.00020397
		2710	0.000203929
		2712.5	0.000203866
		2715	0.000203781
		2717.5	0.000203661
		2720	0.000203534
		2722.5	0.000203383
		2725	0.000203211
		2727.5	0.000203015
		2730	0.000202797
		2732.5	0.000202557
		2735	0.000202281
		2737.5	0.000201995
		2740	0.000201686
		2742.5	0.000201354
		2745	0.000201
		2747.5	0.000200622
		2750	0.000200222
		2752.5	0.000199798
		2755	0.000199352
		2757.5	0.000198883
		2760	0.000198392
		2762.5	0.000197865
		2765	0.00019733
		2767.5	0.000196772
		2770	0.000196193
		2772.5	0.000195592
		2775	0.000194969
		2777.5	0.000194325
		2780	0.000193661
		2782.5	0.000192975
		2785	0.00019227
		2787.5	0.000191544
		2790	0.000190798
		2792.5	0.000190034
		2795	0.00018925
		2797.5	0.000188447
		2800	0.000187627
		2802.5	0.000186776
		2805	0.00018592
		2807.5	0.000185048
		2810	0.000184159
		2812.5	0.000183254
		2815	0.000182333
		2817.5	0.000181397
		2820	0.000180447
		2822.5	0.000179482
		2825	0.000178503
		2827.5	0.000177512
		2830	0.000176507
		2832.5	0.00017549
		2835	0.000174462
		2837.5	0.000173423
		2840	0.000172373
		2842.5	0.000171312
		2845	0.00017023
		2847.5	0.000169152
		2850	0.000168065
		2852.5	0.00016697
		2855	0.000165868
		2857.5	0.000164759
		2860	0.000163644
		2862.5	0.000162523
		2865	0.000161397
		2867.5	0.000160265
		2870	0.00015913
		2872.5	0.000157991
		2875	0.000156849
		2877.5	0.000155704
		2880	0.000154557
		2882.5	0.000153423
		2885	0.000152274
		2887.5	0.000151125
		2890	0.000149964
		2892.5	0.000148816
		2895	0.000147669
		2897.5	0.000146524
		2900	0.00014538
		2902.5	0.000144239
		2905	0.000143088
		2907.5	0.000141953
		2910	0.000140821
		2912.5	0.000139694
		2915	0.000138571
		2917.5	0.000137453
		2920	0.00013634
		2922.5	0.000135233
		2925	0.000134132
		2927.5	0.000133037
		2930	0.000131949
		2932.5	0.000130868
		2935	0.000129794
		2937.5	0.000128728
		2940	0.00012767
		2942.5	0.000126621
		2945	0.00012558
		2947.5	0.000124547
		2950	0.000123525
		2952.5	0.000122511
		2955	0.000121508
		2957.5	0.000120501
		2960	0.000119518
		2962.5	0.000118546
		2965	0.000117584
		2967.5	0.000116634
		2970	0.000115694
		2972.5	0.000114766
		2975	0.000113849
		2977.5	0.000112944
		2980	0.000112051
		2982.5	0.00011117
		2985	0.000110301
		2987.5	0.000109445
		2990	0.000108601
		2992.5	0.00010777
		2995	0.000106952
		2997.5	0.000106147
		3000	0.000105355
		3002.5	0.000104576
		3005	0.000103811
		3007.5	0.00010306
		3010	0.000102322
		3012.5	0.000101599
		3015	0.000100889
		3017.5	0.000100193
		3020	9.9512e-05
		3022.5	9.88451e-05
		3025	9.81926e-05
		3027.5	9.75548e-05
		3030	9.69316e-05
		3032.5	9.63233e-05
		3035	9.573e-05
		3037.5	9.51388e-05
		3040	9.45761e-05
		3042.5	9.40286e-05
		3045	9.34965e-05
		3047.5	9.29798e-05
		3050	9.24788e-05
		3052.5	9.19934e-05
		3055	9.15239e-05
		3057.5	9.10702e-05
		3060	9.06325e-05
		3062.5	9.02108e-05
		3065	8.98054e-05
		3067.5	8.94162e-05
		3070	8.90433e-05
		3072.5	8.86868e-05
		3075	8.83469e-05
		3077.5	8.80235e-05
		3080	8.77167e-05
		3082.5	8.74266e-05
		3085	8.71532e-05
		3087.5	8.68967e-05
		3090	8.66569e-05
		3092.5	8.6434e-05
		3095	8.6228e-05
		3097.5	8.60261e-05
		3100	8.58542e-05
		3102.5	8.56863e-05
		3105	8.55485e-05
		3107.5	8.54275e-05
		3110	8.53232e-05
		3112.5	8.52356e-05
		3115	8.51646e-05
		3117.5	8.51101e-05
		3120	8.50719e-05
		3122.5	8.50501e-05
		3125	8.50444e-05
		3127.5	8.50546e-05
		3130	8.50806e-05
		3132.5	8.51221e-05
		3135	8.5179e-05
		3137.5	8.5251e-05
		3140	8.53378e-05
		3142.5	8.54391e-05
		3145	8.55547e-05
		3147.5	8.56841e-05
		3150	8.5827e-05
		3152.5	8.5983e-05
		3155	8.61517e-05
		3157.5	8.63326e-05
		3160	8.65254e-05
		3162.5	8.67294e-05
		3165	8.69443e-05
		3167.5	8.71693e-05
		3170	8.7404e-05
		3172.5	8.76478e-05
		3175	8.79e-05
		3177.5	8.816e-05
		3180	8.84272e-05
		3182.5	8.87008e-05
		3185	8.89671e-05
		3187.5	8.92522e-05
		3190	8.95413e-05
		3192.5	8.98339e-05
		3195	9.0129e-05
		3197.5	9.04259e-05
		3200	9.07237e-05
		3202.5	9.10215e-05
		3205	9.13185e-05
		3207.5	9.16138e-05
		3210	9.19065e-05
		3212.5	9.21956e-05
		3215	9.24803e-05
		3217.5	9.27596e-05
		3220	9.30326e-05
		3222.5	9.32983e-05
		3225	9.35558e-05
		3227.5	9.38042e-05
		3230	9.40424e-05
		3232.5	9.42696e-05
		3235	9.44848e-05
		3237.5	9.46872e-05
		3240	9.48757e-05
		3242.5	9.50495e-05
		3245	9.52076e-05
		3247.5	9.53493e-05
		3250	9.54736e-05
		3252.5	9.55797e-05
		3255	9.56668e-05
		3257.5	9.57342e-05
		3260	9.57809e-05
		3262.5	9.58064e-05
		3265	9.58098e-05
		3267.5	9.57906e-05
		3270	9.57481e-05
		3272.5	9.56816e-05
		3275	9.55779e-05
		3277.5	9.54629e-05
		3280	9.53223e-05
		3282.5	9.51558e-05
		3285	9.49628e-05
		3287.5	9.4743e-05
		3290	9.44962e-05
		3292.5	9.42221e-05
		3295	9.39205e-05
		3297.5	9.35911e-05
		3300	9.3221e-05
		3302.5	9.28362e-05
		3305	9.24235e-05
		3307.5	9.19828e-05
		3310	9.15144e-05
		3312.5	9.10182e-05
		3315	9.04945e-05
		3317.5	8.99435e-05
		3320	8.93655e-05
		3322.5	8.87607e-05
		3325	8.81296e-05
		3327.5	8.74726e-05
		3330	8.679e-05
		3332.5	8.60825e-05
		3335	8.53504e-05
		3337.5	8.45946e-05
		3340	8.38154e-05
		3342.5	8.30136e-05
		3345	8.219e-05
		3347.5	8.13451e-05
		3350	8.04798e-05
		3352.5	7.95949e-05
		3355	7.86912e-05
		3357.5	7.77695e-05
		3360	7.68306e-05
		3362.5	7.58756e-05
		3365	7.48924e-05
		3367.5	7.3908e-05
		3370	7.29101e-05
		3372.5	7.18998e-05
		3375	7.0878e-05
		3377.5	6.98456e-05
		3380	6.88037e-05
		3382.5	6.77532e-05
		3385	6.66952e-05
		3387.5	6.56305e-05
		3390	6.45603e-05
		3392.5	6.34854e-05
		3395	6.24069e-05
		3397.5	6.13257e-05
		3400	6.02429e-05
		3402.5	5.91592e-05
		3405	5.80758e-05
		3407.5	5.69934e-05
		3410	5.5913e-05
		3412.5	5.48354e-05
		3415	5.37616e-05
		3417.5	5.26923e-05
		3420	5.16284e-05
		3422.5	5.05707e-05
		3425	4.95199e-05
		3427.5	4.84767e-05
		3430	4.74419e-05
		3432.5	4.64162e-05
		3435	4.54002e-05
		3437.5	4.43945e-05
		3440	4.33997e-05
		3442.5	4.24164e-05
		3445	4.14451e-05
		3447.5	4.04862e-05
		3450	3.95404e-05
		3452.5	3.8608e-05
		3455	3.76894e-05
		3457.5	3.67849e-05
		3460	3.5895e-05
		3462.5	3.50199e-05
		3465	3.41599e-05
		3467.5	3.33153e-05
		3470	3.24863e-05
		3472.5	3.16731e-05
		3475	3.08757e-05
		3477.5	3.00945e-05
		3480	2.93294e-05
		3482.5	2.85806e-05
		3485	2.78481e-05
		3487.5	2.71319e-05
		3490	2.64321e-05
		3492.5	2.57485e-05
		3495	2.50813e-05
		3497.5	2.44303e-05
		3500	2.37954e-05
		3502.5	2.31766e-05
		3505	2.25737e-05
		3507.5	2.19866e-05
		3510	2.14151e-05
		3512.5	2.08591e-05
		3515	2.03183e-05
		3517.5	1.97927e-05
		3520	1.92819e-05
		3522.5	1.87857e-05
		3525	1.8304e-05
		3527.5	1.78365e-05
		3530	1.73829e-05
		3532.5	1.6943e-05
		3535	1.65165e-05
		3537.5	1.61032e-05
		3540	1.57027e-05
		3542.5	1.53149e-05
		3545	1.49393e-05
		3547.5	1.45758e-05
		3550	1.4224e-05
		3552.5	1.38836e-05
		3555	1.35418e-05
		3557.5	1.32114e-05
		3560	1.29048e-05
		3562.5	1.26085e-05
		3565	1.23221e-05
		3567.5	1.20453e-05
		3570	1.1778e-05
		3572.5	1.15198e-05
		3575	1.12704e-05
		3577.5	1.10296e-05
		3580	1.07971e-05
		3582.5	1.05726e-05
		3585	1.03559e-05
		3587.5	1.01467e-05
		3590	9.94473e-06
		3592.5	9.74981e-06
		3595	9.56167e-06
		3597.5	9.36734e-06
		3600	9.19257e-06
		3602.5	9.02386e-06
		3605	8.86101e-06
		3607.5	8.7038e-06
		3610	8.55202e-06
		3612.5	8.40546e-06
		3615	8.26394e-06
		3617.5	8.12726e-06
		3620	7.98234e-06
		3622.5	7.85533e-06
		3625	7.7326e-06
		3627.5	7.614e-06
		3630	7.49935e-06
		3632.5	7.38851e-06
		3635	7.28133e-06
		3637.5	7.17765e-06
		3640	7.07734e-06
		3642.5	6.98027e-06
		3645	6.88629e-06
		3647.5	6.7953e-06
		3650	6.70716e-06
		3652.5	6.62176e-06
		3655	6.53899e-06
		3657.5	6.44582e-06
		3660	6.36848e-06
		3662.5	6.29345e-06
		3665	6.22062e-06
		3667.5	6.14991e-06
		3670	6.08123e-06
		3672.5	6.0145e-06
		3675	5.94963e-06
		3677.5	5.88656e-06
		3680	5.82519e-06
		3682.5	5.76548e-06
		3685	5.70734e-06
		3687.5	5.65072e-06
		3690	5.59555e-06
		3692.5	5.54177e-06
		3695	5.48933e-06
		3697.5	5.43817e-06
		3700	5.38824e-06
		3702.5	5.3395e-06
		3705	5.29188e-06
		3707.5	5.24536e-06
		3710	5.19988e-06
		3712.5	5.15541e-06
		3715	5.1119e-06
		3717.5	5.06931e-06
		3720	5.02761e-06
		3722.5	4.98677e-06
		3725	4.94676e-06
		3727.5	4.90753e-06
		3730	4.86906e-06
		3732.5	4.81842e-06
		3735	4.78258e-06
		3737.5	4.74731e-06
		3740	4.71259e-06
		3742.5	4.67841e-06
		3745	4.64476e-06
		3747.5	4.61161e-06
		3750	4.57895e-06
		3752.5	4.54677e-06
		3755	4.51505e-06
		3757.5	4.48378e-06
		3760	4.45295e-06
		3762.5	4.42253e-06
		3765	4.39253e-06
		3767.5	4.36292e-06
		3770	4.3337e-06
		3772.5	4.30484e-06
		3775	4.27635e-06
		3777.5	4.24821e-06
		3780	4.22041e-06
		3782.5	4.19294e-06
		3785	4.16579e-06
		3787.5	4.13895e-06
		3790	4.11241e-06
		3792.5	4.08616e-06
		3795	4.06019e-06
		3797.5	4.0345e-06
		3800	4.00907e-06
		3802.5	3.9839e-06
		3805	3.95899e-06
		3807.5	3.93431e-06
		3810	3.90988e-06
		3812.5	3.88567e-06
		3815	3.86168e-06
		3817.5	3.83792e-06
		3820	3.81436e-06
		3822.5	3.791e-06
		3825	3.76785e-06
		3827.5	3.74489e-06
		3830	3.72211e-06
		3832.5	3.69952e-06
		3835	3.67711e-06
		3837.5	3.65487e-06
		3840	3.6328e-06
		3842.5	3.61089e-06
		3845	3.58914e-06
		3847.5	3.56755e-06
		3850	3.54611e-06
		3852.5	3.52482e-06
		3855	3.50368e-06
		3857.5	3.48267e-06
		3860	3.46181e-06
		3862.5	3.44107e-06
		3865	3.42047e-06
		3867.5	3.4e-06
		3870	3.37966e-06
		3872.5	3.35944e-06
		3875	3.33933e-06
		3877.5	3.30679e-06
		3880	3.28763e-06
		3882.5	3.26855e-06
		3885	3.24954e-06
		3887.5	3.2306e-06
		3890	3.21174e-06
		3892.5	3.19296e-06
		3895	3.17425e-06
		3897.5	3.15561e-06
		3900	3.13705e-06
		3902.5	3.10562e-06
		3905	3.08766e-06
		3907.5	3.06975e-06
		3910	3.0519e-06
		3912.5	3.03411e-06
		3915	3.01638e-06
		3917.5	2.99871e-06
		3920	2.9811e-06
		3922.5	2.96355e-06
		3925	2.94606e-06
		3927.5	2.92862e-06
		3930	2.91125e-06
		3932.5	2.89394e-06
		3935	2.87669e-06
		3937.5	2.8595e-06
		3940	2.84236e-06
		3942.5	2.82529e-06
		3945	2.80828e-06
		3947.5	2.79134e-06
		3950	2.77445e-06
		3952.5	2.75762e-06
		3955	2.74086e-06
		3957.5	2.72415e-06
		3960	2.70751e-06
		3962.5	2.69093e-06
		3965	2.67441e-06
		3967.5	2.65795e-06
		3970	2.64156e-06
		3972.5	2.62522e-06
		3975	2.60895e-06
		3977.5	2.59274e-06
		3980	2.57659e-06
		3982.5	2.56051e-06
		3985	2.54448e-06
		3987.5	2.52852e-06
		3990	2.51263e-06
		3992.5	2.49679e-06
		3995	2.48102e-06
		3997.5	2.46531e-06
		4000	2.44966e-06
		4002.5	2.43408e-06
		4005	2.41856e-06
		4007.5	2.4031e-06
		4010	2.3877e-06
		4012.5	2.37237e-06
		4015	2.3571e-06
		4017.5	2.34189e-06
		4020	2.32675e-06
		4022.5	2.31167e-06
		4025	2.29665e-06
		4027.5	2.2817e-06
		4030	2.26681e-06
		4032.5	2.25198e-06
		4035	2.23722e-06
		4037.5	2.22252e-06
		4040	2.20788e-06
		4042.5	2.19331e-06
		4045	2.1788e-06
		4047.5	2.16435e-06
		4050	2.14997e-06
		4052.5	2.13565e-06
		4055	2.12139e-06
		4057.5	2.1072e-06
		4060	2.09307e-06
		4062.5	2.079e-06
		4065	2.065e-06
		4067.5	2.05106e-06
		4070	2.03718e-06
		4072.5	2.02337e-06
		4075	2.00962e-06
		4077.5	1.99593e-06
		4080	1.98231e-06
		4082.5	1.96875e-06
		4085	1.95525e-06
		4087.5	1.94182e-06
		4090	1.92844e-06
		4092.5	1.91514e-06
		4095	1.90189e-06
		4097.5	1.88871e-06
		4100	1.87559e-06
		4102.5	1.86253e-06
		4105	1.84954e-06
		4107.5	1.83661e-06
		4110	1.82374e-06
		4112.5	1.81094e-06
		4115	1.7982e-06
		4117.5	1.78552e-06
		4120	1.7729e-06
		4122.5	1.76034e-06
		4125	1.74785e-06
		4127.5	1.73542e-06
		4130	1.72305e-06
		4132.5	1.71075e-06
		4135	1.6985e-06
		4137.5	1.68632e-06
		4140	1.6742e-06
		4142.5	1.66214e-06
		4145	1.65014e-06
		4147.5	1.63821e-06
		4150	1.62634e-06
		4152.5	1.61452e-06
		4155	1.60277e-06
		4157.5	1.59108e-06
		4160	1.57945e-06
		4162.5	1.56789e-06
		4165	1.55638e-06
		4167.5	1.54494e-06
		4170	1.53355e-06
		4172.5	1.52223e-06
		4175	1.51096e-06
		4177.5	1.49976e-06
		4180	1.48862e-06
		4182.5	1.47754e-06
		4185	1.46651e-06
		4187.5	1.45555e-06
		4190	1.44465e-06
		4192.5	1.43381e-06
		4195	1.42302e-06
		4197.5	1.4123e-06
		4200	1.40164e-06
		4202.5	1.39103e-06
		4205	1.38048e-06
		4207.5	1.37e-06
		4210	1.35957e-06
		4212.5	1.3492e-06
		4215	1.33889e-06
		4217.5	1.32864e-06
		4220	1.31844e-06
		4222.5	1.30831e-06
		4225	1.29823e-06
		4227.5	1.28821e-06
		4230	1.27825e-06
		4232.5	1.26834e-06
		4235	1.25849e-06
		4237.5	1.24871e-06
		4240	1.23897e-06
		4242.5	1.2293e-06
		4245	1.21968e-06
		4247.5	1.21012e-06
		4250	1.20061e-06
		4252.5	1.19116e-06
		4255	1.18177e-06
		4257.5	1.17243e-06
		4260	1.15022e-06
		4262.5	1.14118e-06
		4265	1.13218e-06
		4267.5	1.12325e-06
		4270	1.11436e-06
		4272.5	1.10553e-06
		4275	1.09675e-06
		4277.5	1.08802e-06
		4280	1.07935e-06
		4282.5	1.07072e-06
		4285	1.06215e-06
		4287.5	1.05363e-06
		4290	1.04517e-06
		4292.5	1.03675e-06
		4295	1.02839e-06
		4297.5	1.02008e-06
		4300	1.01182e-06
		4302.5	1.00361e-06
		4305	9.95446e-07
		4307.5	9.87338e-07
		4310	9.7928e-07
		4312.5	9.71272e-07
		4315	9.63315e-07
		4317.5	9.55408e-07
		4320	9.47551e-07
		4322.5	9.39744e-07
		4325	9.31986e-07
		4327.5	9.24278e-07
		4330	9.16619e-07
		4332.5	9.09009e-07
		4335	9.01448e-07
		4337.5	8.93936e-07
		4340	8.86472e-07
		4342.5	8.79057e-07
		4345	8.7169e-07
		4347.5	8.64371e-07
		4350	8.57101e-07
		4352.5	8.49877e-07
		4355	8.42702e-07
		4357.5	8.35574e-07
		4360	8.28493e-07
		4362.5	8.21459e-07
		4365	8.14471e-07
		4367.5	8.07531e-07
		4370	8.00637e-07
		4372.5	7.93789e-07
		4375	7.86988e-07
		4377.5	7.80232e-07
		4380	7.73523e-07
		4382.5	7.66858e-07
		4385	7.6024e-07
		4387.5	7.53666e-07
		4390	7.47137e-07
		4392.5	7.40654e-07
		4395	7.34215e-07
		4397.5	7.2782e-07
		4400	7.2147e-07
		4402.5	7.15164e-07
		4405	7.08902e-07
		4407.5	7.02683e-07
		4410	6.96508e-07
		4412.5	6.90377e-07
		4415	6.84288e-07
		4417.5	6.78243e-07
		4420	6.7224e-07
		4422.5	6.6628e-07
		4425	6.60363e-07
		4427.5	6.54487e-07
		4430	6.48654e-07
		4432.5	6.42862e-07
		4435	6.37112e-07
		4437.5	6.31404e-07
		4440	6.25737e-07
		4442.5	6.20111e-07
		4445	6.14526e-07
		4447.5	6.08981e-07
		4450	6.03477e-07
		4452.5	5.98013e-07
		4455	5.9259e-07
		4457.5	5.87206e-07
		4460	5.81862e-07
		4462.5	5.76557e-07
		4465	5.71292e-07
		4467.5	5.66066e-07
		4470	5.60879e-07
		4472.5	5.55731e-07
		4475	5.50621e-07
		4477.5	5.4555e-07
		4480	5.40516e-07
		4482.5	5.35521e-07
		4485	5.30564e-07
		4487.5	5.25644e-07
		4490	5.20761e-07
		4492.5	5.15916e-07
		4495	5.11108e-07
		4497.5	5.06336e-07
		4500	5.01602e-07
		4502.5	4.96903e-07
		4505	4.92241e-07
		4507.5	4.87615e-07
		4510	4.83025e-07
		4512.5	4.7847e-07
		4515	4.73951e-07
		4517.5	4.69467e-07
		4520	4.65018e-07
		4522.5	4.60604e-07
		4525	4.56225e-07
		4527.5	4.5188e-07
		4530	4.4757e-07
		4532.5	4.43293e-07
		4535	4.39051e-07
		4537.5	4.34842e-07
		4540	4.30667e-07
		4542.5	4.26525e-07
		4545	4.22417e-07
		4547.5	4.18341e-07
		4550	4.14298e-07
		4552.5	4.10288e-07
		4555	4.0631e-07
		4557.5	4.02364e-07
		4560	3.98451e-07
		4562.5	3.94569e-07
		4565	3.90719e-07
		4567.5	3.869e-07
		4570	3.83113e-07
		4572.5	3.79356e-07
		4575	3.75631e-07
		4577.5	3.71936e-07
		4580	3.68272e-07
		4582.5	3.64638e-07
		4585	3.61034e-07
		4587.5	3.5746e-07
		4590	3.53916e-07
		4592.5	3.50402e-07
		4595	3.46917e-07
		4597.5	3.43461e-07
		4600	3.40035e-07
		4602.5	3.36637e-07
		4605	3.33268e-07
		4607.5	3.29927e-07
		4610	3.26615e-07
		4612.5	3.23331e-07
		4615	3.20074e-07
		4617.5	3.16846e-07
		4620	3.13645e-07
		4622.5	3.10472e-07
		4625	3.07326e-07
		4627.5	3.04207e-07
		4630	3.01115e-07
		4632.5	2.98049e-07
		4635	2.9501e-07
		4637.5	2.91998e-07
		4640	2.89012e-07
		4642.5	2.86051e-07
		4645	2.83117e-07
		4647.5	2.80208e-07
		4650	2.77325e-07
		4652.5	2.74467e-07
		4655	2.71634e-07
		4657.5	2.68827e-07
		4660	2.66044e-07
		4662.5	2.63285e-07
		4665	2.60552e-07
		4667.5	2.57842e-07
		4670	2.55157e-07
		4672.5	2.52495e-07
		4675	2.49858e-07
		4677.5	2.47244e-07
		4680	2.44653e-07
		4682.5	2.42086e-07
		4685	2.39542e-07
		4687.5	2.37021e-07
		4690	2.34523e-07
		4692.5	2.32048e-07
		4695	2.29595e-07
		4697.5	2.27164e-07
		4700	2.24756e-07
		4702.5	2.22369e-07
		4705	2.20005e-07
		4707.5	2.17662e-07
		4710	2.15341e-07
		4712.5	2.13041e-07
		4715	2.10762e-07
		4717.5	2.08504e-07
		4720	2.06268e-07
		4722.5	2.04052e-07
		4725	2.01856e-07
		4727.5	1.99682e-07
		4730	1.97527e-07
		4732.5	1.95393e-07
		4735	1.93278e-07
		4737.5	1.91184e-07
		4740	1.89109e-07
		4742.5	1.87054e-07
		4745	1.85018e-07
		4747.5	1.83002e-07
		4750	1.81004e-07
		4752.5	1.79026e-07
		4755	1.77066e-07
		4757.5	1.75125e-07
		4760	1.73203e-07
		4762.5	1.71299e-07
		4765	1.69413e-07
		4767.5	1.67545e-07
		4770	1.65696e-07
		4772.5	1.63864e-07
		4775	1.6205e-07
		4777.5	1.60253e-07
		4780	1.58474e-07
		4782.5	1.56712e-07
		4785	1.54967e-07
		4787.5	1.5324e-07
		4790	1.51529e-07
		4792.5	1.49835e-07
		4795	1.48157e-07
		4797.5	1.46496e-07
		4800	1.44851e-07
		4802.5	1.43223e-07
		4805	1.4161e-07
		4807.5	1.40014e-07
		4810	1.38433e-07
		4812.5	1.36868e-07
		4815	1.35318e-07
		4817.5	1.33784e-07
		4820	1.32266e-07
		4822.5	1.30762e-07
		4825	1.29274e-07
		4827.5	1.278e-07
		4830	1.26341e-07
		4832.5	1.24897e-07
		4835	1.23467e-07
		4837.5	1.22052e-07
		4840	1.20652e-07
		4842.5	1.19265e-07
		4845	1.17892e-07
		4847.5	1.16534e-07
		4850	1.15189e-07
		4852.5	1.13858e-07
		4855	1.12541e-07
		4857.5	1.11237e-07
		4860	1.09946e-07
		4862.5	1.08669e-07
		4865	1.07405e-07
		4867.5	1.06153e-07
		4870	1.04915e-07
		4872.5	1.0369e-07
		4875	1.02477e-07
		4877.5	1.01277e-07
		4880	1.00089e-07
		4882.5	9.8914e-08
		4885	9.7751e-08
		4887.5	9.66001e-08
		4890	9.54612e-08
		4892.5	9.43343e-08
		4895	9.32192e-08
		4897.5	9.21159e-08
		4900	9.10241e-08
		4902.5	8.99439e-08
		4905	8.88751e-08
		4907.5	8.78176e-08
		4910	8.67713e-08
		4912.5	8.57362e-08
		4915	8.4712e-08
		4917.5	8.36988e-08
		4920	8.26963e-08
		4922.5	8.17046e-08
		4925	8.07235e-08
		4927.5	7.9753e-08
		4930	7.87928e-08
		4932.5	7.7843e-08
		4935	7.69034e-08
		4937.5	7.59739e-08
		4940	7.50546e-08
		4942.5	7.41451e-08
		4945	7.32455e-08
		4947.5	7.23557e-08
		4950	7.14756e-08
		4952.5	7.0605e-08
		4955	6.9744e-08
		4957.5	6.88924e-08
		4960	6.80501e-08
		4962.5	6.7217e-08
		4965	6.63931e-08
		4967.5	6.55783e-08
		4970	6.47724e-08
		4972.5	6.39754e-08
		4975	6.31872e-08
		4977.5	6.24078e-08
		4980	6.1637e-08
		4982.5	6.08747e-08
		4985	6.01209e-08
		4987.5	5.93756e-08
		4990	5.86385e-08
		4992.5	5.79097e-08
		4995	5.7189e-08
		4997.5	5.64764e-08
[truncated: 1 more rows]

## Sheet: PlotDat4
Source sheet	all data	0.420018	0.0559001	340		345		350		355		360		365		0.396398	0.054	0.397207	0.054	0.397729	0.0541582	0.437551	0.0567507	0.435374	0.0567971	0.442443	0.057972	0.434001	0.0569763
Plot name	Concordia1	0.419893	0.0559609	0.398508	0.0541582	0.405423	0.0549761	0.412373	0.0557947	0.419356	0.0566139	0.426375	0.0574338	0.433427	0.0582543	0.396398	0.054	0.397846	0.0540758	0.404629	0.0549761	0.437203	0.0569528	0.435066	0.056978	0.442117	0.0581612	0.433768	0.0571121
Plot Type	1	0.425951	0.0572288	0.398493	0.0541724	0.405408	0.0549905	0.412357	0.0558093	0.419341	0.0566288	0.426358	0.0574489	0.433411	0.0582696	0.397846	0.054172	0.399295	0.0542475	0.411563	0.0557947	0.436195	0.0571144	0.434175	0.0571198	0.441169	0.0583145	0.433094	0.0572206
1st free col	31	IsoLine	IsoLine	0.398449	0.054186	0.405363	0.0550044	0.412311	0.0558234	0.419294	0.0566431	0.426311	0.0574634	0.433362	0.0582843	0.399295	0.0543441	0.400746	0.0544193	0.418531	0.0566139	0.434566	0.0572293	0.432735	0.057217	0.439637	0.0584262	0.432004	0.0572974
Sigma Level	2			0.398377	0.0541986	0.40529	0.0550172	0.412236	0.0558364	0.419217	0.0566562	0.426233	0.0574767	0.433283	0.0582979	0.400746	0.0545161	0.402198	0.0545911	0.425533	0.0574338	0.432377	0.0572932	0.430801	0.0572659	0.437579	0.0584918	0.43054	0.0573396
Absolute Errs	FALSE			0.39828	0.0542096	0.405191	0.0550284	0.412136	0.0558478	0.419115	0.0566678	0.426128	0.0574885	0.433176	0.0583097	0.402198	0.0546882	0.403651	0.0547629	0.43257	0.0582543	0.429714	0.0573035	0.428449	0.0572647	0.435074	0.0585089	0.428758	0.0573456
Symbol Type	1			0.398162	0.0542187	0.40507	0.0550376	0.412013	0.0558571	0.41899	0.0566773	0.426001	0.0574981	0.433047	0.0583195	0.403651	0.0548604	0.405106	0.0549347	IsoLine	IsoLine	0.426677	0.0572599	0.425767	0.0572134	0.432219	0.0584768	0.426727	0.0573152
Inverse Plot	FALSE			0.398027	0.0542254	0.404933	0.0550444	0.411873	0.055864	0.418847	0.0566843	0.425855	0.0575052	0.432898	0.0583268	0.405106	0.0550325	0.406563	0.0551066			0.423385	0.057164	0.42286	0.057114	0.429122	0.0583967	0.424525	0.0572495
Color Plot	TRUE			0.397881	0.0542296	0.404784	0.0550486	0.411721	0.0558683	0.418692	0.0566886	0.425697	0.0575096	0.432738	0.0583312	0.406563	0.0552047	0.408021	0.0552785			0.419964	0.0570196	0.419838	0.0569703	0.425904	0.0582717	0.422236	0.0571511
3D plot	FALSE			0.397729	0.054231	0.404629	0.0550501	0.411563	0.0558698	0.418531	0.0566901	0.425533	0.0575111	0.43257	0.0583327	0.408021	0.0553769	0.40948	0.0554504			0.416544	0.0568321	0.416819	0.0567877	0.422688	0.0581067	0.419948	0.0570238
Linear	FALSE			0.397577	0.0542296	0.404474	0.0550486	0.411405	0.0558683	0.41837	0.0566886	0.425369	0.0575096	0.432403	0.0583312	0.40948	0.0555492	0.410941	0.0556224			0.413258	0.0566088	0.413918	0.0565734	0.419597	0.057908	0.417751	0.0568723
Data Range	AA4:AE6			0.397431	0.0542254	0.404325	0.0550444	0.411253	0.055864	0.418215	0.0566843	0.425211	0.0575052	0.432242	0.0583268	0.410941	0.0557215	0.412404	0.0557944			0.410232	0.0563583	0.411246	0.0563356	0.41675	0.0576831	0.415726	0.0567027
Filled Symbols	TRUE			0.397297	0.0542187	0.404188	0.0550376	0.411113	0.0558571	0.418072	0.0566773	0.425066	0.0574981	0.432094	0.0583195	0.412404	0.0558938	0.413868	0.0559664			0.407582	0.0560902	0.408907	0.0560833	0.414257	0.0574408	0.413954	0.0565213
ConcAge	TRUE			0.397178	0.0542096	0.404067	0.0550284	0.41099	0.0558478	0.417947	0.0566678	0.424938	0.0574885	0.431964	0.0583097	0.413868	0.0560661	0.415334	0.0561384			0.40541	0.0558148	0.40699	0.0558264	0.412213	0.0571903	0.412501	0.0563351
ConcSwap	FALSE			0.397082	0.0541986	0.403969	0.0550172	0.410889	0.0558364	0.417845	0.0566562	0.424834	0.0574767	0.431858	0.0582979	0.415334	0.0562385	0.416801	0.0563105			0.403799	0.0555426	0.405569	0.0555746	0.410697	0.0569413	0.411424	0.0561514
1st Symbol-row	1			0.39701	0.054186	0.403895	0.0550044	0.410815	0.0558234	0.417768	0.0566431	0.424756	0.0574634	0.431778	0.0582843	0.416801	0.0564108	0.41827	0.0564826			0.402811	0.0552842	0.404698	0.0553377	0.409768	0.0567034	0.410763	0.0559771
				0.396965	0.0541724	0.40385	0.0549905	0.410769	0.0558093	0.417721	0.0566288	0.424708	0.0574489	0.43173	0.0582696	0.41827	0.0565833	0.41974	0.0566547			0.402485	0.0550495	0.404411	0.0551247	0.40946	0.0564856	0.410545	0.055819
				0.39695	0.0541582	0.403835	0.0549761	0.410753	0.0557947	0.417705	0.0566139	0.424692	0.0574338	0.431713	0.0582543	0.41974	0.0567557	0.421211	0.0568269			0.402833	0.0548474	0.404719	0.0549438	0.409786	0.0562964	0.410778	0.0556831
				0.396965	0.054144	0.40385	0.0549617	0.410769	0.0557801	0.417721	0.056599	0.424708	0.0574187	0.43173	0.058239	0.421211	0.0569282	0.422685	0.0569991			0.403841	0.0546858	0.405611	0.0548021	0.410733	0.0561431	0.411452	0.0555747
				0.39701	0.0541303	0.403895	0.0549478	0.410815	0.055766	0.417768	0.0565848	0.424756	0.0574042	0.431778	0.0582242	0.422685	0.0571007	0.424159	0.0571713			0.40547	0.0545709	0.407051	0.0547049	0.412265	0.0560314	0.412542	0.0554979
				0.397082	0.0541177	0.403969	0.054935	0.410889	0.055753	0.417845	0.0565716	0.424834	0.0573908	0.431858	0.0582107	0.424159	0.0572732	0.425636	0.0573435			0.407659	0.054507	0.408984	0.0546559	0.414323	0.0559658	0.414006	0.0554557
				0.397178	0.0541067	0.404067	0.0549238	0.41099	0.0557416	0.417947	0.05656	0.424938	0.0573791	0.431964	0.0581988	0.425636	0.0574457	0.427114	0.0575158			0.410322	0.0544967	0.411337	0.0546571	0.416828	0.0559487	0.415788	0.0554496
				0.397297	0.0540976	0.404188	0.0549146	0.411113	0.0557323	0.418072	0.0565506	0.425066	0.0573695	0.432094	0.058189	0.427114	0.0576183	0.428593	0.0576881			0.413359	0.0545403	0.414019	0.0547084	0.419684	0.0559808	0.417819	0.05548
				0.397431	0.0540909	0.404325	0.0549078	0.411253	0.0557253	0.418215	0.0565435	0.425211	0.0573623	0.432242	0.0581818	0.428593	0.0577909	0.430074	0.0578604			0.416651	0.0546362	0.416926	0.0548078	0.42278	0.0560609	0.420021	0.0555457
				0.397577	0.0540868	0.404474	0.0549036	0.411405	0.0557211	0.41837	0.0565392	0.425369	0.0573579	0.432403	0.0581773	0.430074	0.0579636	0.431556	0.0580328			0.420072	0.0547806	0.419947	0.0549516	0.425998	0.0561858	0.42231	0.0556441
				0.397729	0.0540854	0.404629	0.0549022	0.411563	0.0557196	0.418531	0.0565377	0.425533	0.0573564	0.43257	0.0581758	0.431556	0.0581362	0.43304	0.0582051			0.423492	0.0549681	0.422967	0.0551341	0.429215	0.0563509	0.424597	0.0557715
				0.397881	0.0540868	0.404784	0.0549036	0.411721	0.0557211	0.418692	0.0565392	0.425697	0.0573579	0.432738	0.0581773	0.43304	0.0583089	0.434526	0.0583776			0.426778	0.0551913	0.425868	0.0553484	0.432306	0.0565496	0.426795	0.0559229
				0.398027	0.0540909	0.404933	0.0549078	0.411873	0.0557253	0.418847	0.0565435	0.425855	0.0573623	0.432898	0.0581818	0.434526	0.0584817	0.436013	0.05855			0.429804	0.0554419	0.428539	0.0555863	0.435152	0.0567745	0.42882	0.0560926
				0.398162	0.0540976	0.40507	0.0549146	0.412013	0.0557323	0.41899	0.0565506	0.426001	0.0573695	0.433047	0.058189	0.436013	0.0586544	0.437501	0.0587225			0.432454	0.05571	0.430879	0.0558385	0.437646	0.0570168	0.430592	0.056274
				0.39828	0.0541067	0.405191	0.0549238	0.412136	0.0557416	0.419115	0.05656	0.426128	0.0573791	0.433176	0.0581988	0.437501	0.0588272	0.438992	0.0588949			0.434626	0.0559854	0.432796	0.0560955	0.439689	0.0572673	0.432045	0.0564601
				0.398377	0.0541177	0.40529	0.054935	0.412236	0.055753	0.419217	0.0565716	0.426233	0.0573908	0.433283	0.0582107	0.438992	0.059	0.4399	0.059			0.436237	0.0562576	0.434217	0.0563472	0.441205	0.0575163	0.433122	0.0566439
				0.398449	0.0541303	0.405363	0.0549478	0.412311	0.055766	0.419294	0.0565848	0.426311	0.0574042	0.433362	0.0582242	0.438992	0.059	0.438087	0.059			0.437225	0.056516	0.435088	0.0565842	0.442135	0.0577542	0.433783	0.0568181
				0.398493	0.054144	0.405408	0.0549617	0.412357	0.0557801	0.419341	0.056599	0.426358	0.0574187	0.433411	0.058239	IsoLine	IsoLine	0.437501	0.0589319			0.437551	0.0567507	0.435374	0.0567971	0.442443	0.057972	0.434001	0.0569763
				0.398508	0.0541582	0.405423	0.0549761	0.412373	0.0557947	0.419356	0.0566139	0.426375	0.0574338	0.433427	0.0582543			0.436013	0.0587588			ErrEll	ErrEll	ErrEll	ErrEll	ErrEll	ErrEll	ErrEll	ErrEll
				ConcTikEll	ConcTikEll	ConcTikEll	ConcTikEll	ConcTikEll	ConcTikEll	ConcTikEll	ConcTikEll	ConcTikEll	ConcTikEll	ConcTikEll	ConcTikEll			0.434526	0.0585858
																		0.43304	0.0584127
																		0.431556	0.0582397
																		0.430074	0.0580667
																		0.428593	0.0578938
																		0.427114	0.0577209
																		0.425636	0.057548
																		0.424159	0.0573751
																		0.422685	0.0572022
																		0.421211	0.0570294
																		0.41974	0.0568566
																		0.41827	0.0566839
																		0.416801	0.0565112
																		0.415334	0.0563385
																		0.413868	0.0561658
																		0.412404	0.0559931
																		0.410941	0.0558205
																		0.40948	0.0556479
																		0.408021	0.0554754
																		0.406563	0.0553029
																		0.405106	0.0551303
																		0.403651	0.0549579
																		0.402198	0.0547854
																		0.400746	0.054613
																		0.399295	0.0544406
																		0.397846	0.0542683
																		0.396398	0.0540959
																		0.395593	0.054
																		0.397207	0.054
																		ConcBand	ConcBand

## Sheet: Hoja4
279.975	2	314.224	2	324.37	2	336.626	2	338.049	1	356.626	4	362.971	3	1.91899	158	1.146	328	0.931887	311	1.30204	358	1.2662	346	1.27696	240	16.9529	1
283.81	4	316.98	4	327.084	1	338.978	0	340.951	0	359.39	9	366.298	6	5.65286	165	3.43748	318	2.78409	263	3.90023	301	3.7951	317	3.7551	244	22.1763	1
287.644	6	319.736	5	329.798	3	341.33	9	343.852	0	362.155	21	369.626	18	9.38674	224	5.72897	290	4.6363	243	6.49843	303	6.32401	271	6.23325	230	27.3996	4
291.479	10	322.492	19	332.512	11	343.681	19	346.754	2	364.919	57	372.954	26	13.1206	253	8.02045	211	6.48851	216	9.09662	284	8.85292	233	8.7114	210	32.623	9
295.314	35	325.248	43	335.226	20	346.033	47	349.656	3	367.683	105	376.282	64	16.8545	211	10.3119	207	8.34071	189	11.6948	214	11.3818	216	11.1895	230	37.8464	29
299.149	38	328.004	67	337.94	49	348.385	59	352.558	25	370.448	153	379.61	143	20.5884	209	12.6034	156	10.1929	198	14.293	167	13.9107	170	13.6677	180	43.0697	51
302.984	69	330.76	80	340.654	103	350.737	105	355.459	51	373.212	216	382.938	219	24.3222	175	14.8949	129	12.0451	119	16.8912	134	16.4396	143	16.1458	135	48.2931	107
306.819	116	333.516	168	343.368	152	353.089	167	358.361	86	375.976	268	386.266	240	28.0561	160	17.1864	94	13.8973	106	19.4894	96	18.9685	91	18.624	109	53.5165	175
310.653	151	336.272	190	346.082	226	355.441	221	361.263	175	378.741	295	389.594	280	31.79	155	19.4779	88	15.7495	96	22.0876	50	21.4974	90	21.1021	100	58.7398	211
314.488	193	339.027	216	348.796	264	357.793	246	364.165	259	381.505	274	392.921	263	35.5239	97	21.7693	54	17.6017	80	24.6858	44	24.0264	39	23.5803	91	63.9632	243
318.323	241	341.783	284	351.51	313	360.145	275	367.066	334	384.269	202	396.249	229	39.2577	72	24.0608	47	19.4539	55	27.284	24	26.5553	32	26.0584	57	69.1866	283
322.158	239	344.539	272	354.224	298	362.497	263	369.968	307	387.034	151	399.577	185	42.9916	42	26.3523	28	21.3062	38	29.8822	13	29.0842	25	28.5366	60	74.4099	261
325.993	232	347.295	216	356.938	230	364.849	217	372.87	278	389.798	104	402.905	114	46.7255	36	28.6438	14	23.1584	31	32.4804	5	31.6131	13	31.0147	34	79.6333	217
329.827	236	350.051	205	359.652	172	367.201	141	375.772	201	392.562	71	406.233	92	50.4594	15	30.9353	19	25.0106	17	35.0786	3	34.142	5	33.4929	29	84.8566	153
333.662	186	352.807	108	362.366	97	369.553	109	378.673	125	395.327	30	409.561	56	54.1932	15	33.2267	5	26.8628	14	37.6768	1	36.6709	3	35.971	19	90.08	108
337.497	125	355.563	78	365.08	38	371.905	61	381.575	92	398.091	21	412.889	37	57.9271	7	35.5182	5	28.715	8	40.275	2	39.1998	3	38.4492	11	95.3034	83
341.332	74	358.319	26	367.794	14	374.257	31	384.477	34	400.855	9	416.217	16	61.661	2	37.8097	2	30.5672	5	42.8732	0	41.7287	2	40.9273	9	100.527	27
345.167	28	361.075	14	370.508	5	376.609	19	387.379	15	403.62	5	419.544	6	65.3949	2	40.1012	2	32.4194	4	45.4714	0	44.2576	0	43.4055	7	105.75	21
349.002	9	363.83	2	373.222	1	378.961	6	390.28	7	406.384	3	422.872	1	69.1287	1	42.3927	1	34.2716	4	48.0696	0	46.7865	0	45.8836	3	110.973	12
352.836	5	366.586	0	375.936	0	381.313	2	393.182	4	409.148	1	426.2	1	72.8626	0	44.6842	1	36.1238	2	50.6678	0	49.3154	0	48.3618	1	116.197	3

## Sheet: Hoja5
341.333	0	0	353	0	346.675	0	346.675	0
342	0	0	353	5042.06	346.675	5042.06	346.675	5042.06
342	1
341.333	1
341.333	0
ErrBox	ErrBox
342	0
342.667	0
342.667	1
342	1
342	0
ErrBox	ErrBox
342.667	0
343.333	0
343.333	5
342.667	5
342.667	0
ErrBox	ErrBox
343.333	0
344	0
344	11
343.333	11
343.333	0
ErrBox	ErrBox
344	0
344.667	0
344.667	26
344	26
344	0
ErrBox	ErrBox
344.667	0
345.333	0
345.333	72
344.667	72
344.667	0
ErrBox	ErrBox
345.333	0
346	0
346	129
345.333	129
345.333	0
ErrBox	ErrBox
346	0
346.667	0
346.667	249
346	249
346	0
ErrBox	ErrBox
346.667	0
347.333	0
347.333	397
346.667	397
346.667	0
ErrBox	ErrBox
347.333	0
348	0
348	681
347.333	681
347.333	0
ErrBox	ErrBox
348	0
348.667	0
348.667	1091
348	1091
348	0
ErrBox	ErrBox
348.667	0
349.333	0
349.333	1556
348.667	1556
348.667	0
ErrBox	ErrBox
349.333	0
350	0
350	2212
349.333	2212
349.333	0
ErrBox	ErrBox
350	0
350.667	0
350.667	2738
350	2738
350	0
ErrBox	ErrBox
350.667	0
351.333	0
351.333	3365
350.667	3365
350.667	0
ErrBox	ErrBox
351.333	0
352	0
352	3760
351.333	3760
351.333	0
ErrBox	ErrBox
352	0
352.667	0
352.667	3987
352	3987
352	0
ErrBox	ErrBox
352.667	0
353.333	0
353.333	3999
352.667	3999
352.667	0
ErrBox	ErrBox
353.333	0
354	0
354	3731
353.333	3731
353.333	0
ErrBox	ErrBox
354	0
354.667	0
354.667	3218
354	3218
354	0
ErrBox	ErrBox
354.667	0
355.333	0
355.333	2713
354.667	2713
354.667	0
ErrBox	ErrBox
355.333	0
356	0
356	2119
355.333	2119
355.333	0
ErrBox	ErrBox
356	0
356.667	0
356.667	1468
356	1468
356	0
ErrBox	ErrBox
356.667	0
357.333	0
357.333	1000
356.667	1000
356.667	0
ErrBox	ErrBox
357.333	0
358	0
358	631
357.333	631
357.333	0
ErrBox	ErrBox
358	0
358.667	0
358.667	402
358	402
358	0
ErrBox	ErrBox
358.667	0
359.333	0
359.333	208
358.667	208
358.667	0
ErrBox	ErrBox
359.333	0
360	0
360	128
359.333	128
359.333	0
ErrBox	ErrBox
360	0
360.667	0
360.667	57
360	57
360	0
ErrBox	ErrBox
360.667	0
361.333	0
361.333	22
360.667	22
360.667	0
ErrBox	ErrBox
361.333	0
362	0
362	11
361.333	11
361.333	0
ErrBox	ErrBox
362	0
362.667	0
362.667	6
362	6
362	0
ErrBox	ErrBox
362.667	0
363.333	0
363.333	2
362.667	2
362.667	0
ErrBox	ErrBox
363.333	0
364	0
364	3
363.333	3
363.333	0
ErrBox	ErrBox
364.667	0
365.333	0
365.333	1
364.667	1
364.667	0
ErrBox	ErrBox

## Sheet: PlotDat5
Source sheet	all data	0.443918	0.0589799	360		370		380		390		400		0.42	0.0567862	0.42	0.0566852	0.425533	0.0574338	0.457538	0.0598946	0.467579	0.0607949	0.477333	0.0620929	0.487305	0.0630676	0.473889	0.0614462
Plot name	Concordia2	0.449857	0.0599462	0.426375	0.0574338	0.440515	0.0590754	0.454796	0.0607196	0.469218	0.0623663	0.483784	0.0640155	0.42	0.0567862	0.42	0.0566852	0.439642	0.0590754	0.457264	0.0600528	0.467228	0.0609989	0.476965	0.0622985	0.486925	0.0632806	0.473497	0.0616758
Plot Type	1	0.458615	0.0613887	0.426358	0.0574489	0.440498	0.0590909	0.454779	0.0607355	0.4692	0.0623827	0.483765	0.0640324	0.422409	0.0570684	0.422409	0.0569669	0.45389	0.0607196	0.456478	0.0601697	0.466209	0.0611625	0.475892	0.0624692	0.485835	0.0634322	0.472364	0.0618533
1st free col	31	0.468443	0.0616846	0.426311	0.0574634	0.440449	0.0591058	0.454727	0.0607509	0.469147	0.0623985	0.48371	0.0640486	0.424822	0.0573506	0.424822	0.0572486	0.46828	0.0623663	0.455209	0.0602408	0.464562	0.0612794	0.474155	0.0625983	0.484076	0.0635167	0.470536	0.061972
Sigma Level	2	IsoLine	IsoLine	0.426233	0.0574767	0.440368	0.0591196	0.454643	0.060765	0.46906	0.062413	0.48362	0.0640636	0.427239	0.057633	0.427239	0.0575304	0.482812	0.0640155	0.453506	0.0602636	0.46235	0.061345	0.471821	0.062681	0.481717	0.0635308	0.468081	0.0620273
Absolute Errs	FALSE			0.426128	0.0574885	0.440259	0.0591317	0.454531	0.0607775	0.468944	0.0624258	0.483499	0.0640767	0.42966	0.0579154	0.42966	0.0578123	IsoLine	IsoLine	0.451434	0.060237	0.459658	0.0613569	0.468979	0.062714	0.478847	0.0634739	0.465094	0.062017
Symbol Type	1			0.426001	0.0574981	0.440127	0.0591416	0.454394	0.0607876	0.468801	0.0624363	0.483352	0.0640874	0.432086	0.0581978	0.432086	0.0580943			0.449074	0.060162	0.456589	0.0613145	0.465739	0.0626961	0.475578	0.0633483	0.461689	0.0619416
Inverse Plot	FALSE			0.425855	0.0575052	0.439976	0.0591489	0.454237	0.0607952	0.468639	0.062444	0.483184	0.0640954	0.434515	0.0584804	0.434515	0.0583763			0.446516	0.0600417	0.453261	0.0612196	0.462226	0.0626279	0.472035	0.0631587	0.457999	0.061804
Color Plot	TRUE			0.425697	0.0575096	0.439812	0.0591535	0.454067	0.0607999	0.468463	0.0624488	0.483001	0.0641003	0.436948	0.058763	0.436948	0.0586584			0.443858	0.0598805	0.449803	0.0610757	0.458573	0.0625122	0.468353	0.0629125	0.454164	0.0616094
3D plot	FALSE			0.425533	0.0575111	0.439642	0.059155	0.45389	0.0608014	0.46828	0.0624504	0.482812	0.064102	0.439386	0.0590457	0.439386	0.0589406			0.441202	0.0596848	0.446347	0.0608885	0.454922	0.0623532	0.464675	0.0626191	0.450331	0.0613653
Linear	FALSE			0.425369	0.0575096	0.439472	0.0591535	0.453714	0.0607999	0.468097	0.0624488	0.482622	0.0641003	0.441828	0.0593285	0.441828	0.0592229			0.43865	0.0594619	0.443025	0.060665	0.451413	0.0621572	0.461142	0.0622898	0.446649	0.0610811
Data Range	AA7:AE10			0.425211	0.0575052	0.439308	0.0591489	0.453544	0.0607952	0.467921	0.062444	0.48244	0.0640954	0.444274	0.0596114	0.444274	0.0595052			0.436301	0.0592205	0.439966	0.0604139	0.448181	0.0619316	0.457889	0.0619372	0.443258	0.0607678
Filled Symbols	TRUE			0.425066	0.0574981	0.439157	0.0591416	0.453387	0.0607876	0.467758	0.0624363	0.482271	0.0640874	0.446724	0.0598943	0.446724	0.0597876			0.434245	0.0589699	0.437287	0.0601448	0.44535	0.0616852	0.455042	0.0615749	0.44029	0.0604373
ConcAge	TRUE			0.424938	0.0574885	0.439025	0.0591317	0.45325	0.0607775	0.467616	0.0624258	0.482124	0.0640767	0.449178	0.0601773	0.449178	0.0600701			0.43256	0.0587197	0.435092	0.0598681	0.443028	0.0614274	0.45271	0.0612169	0.437857	0.0601024
ConcSwap	FALSE			0.424834	0.0574767	0.438916	0.0591196	0.453137	0.060765	0.467499	0.062413	0.482003	0.0640636	0.451637	0.0604604	0.451637	0.0603527			0.431312	0.0584794	0.433463	0.0595944	0.441306	0.0611681	0.450983	0.0608768	0.436054	0.0597759
1st Symbol-row	1			0.424756	0.0574634	0.438835	0.0591058	0.453054	0.0607509	0.467413	0.0623985	0.481913	0.0640486	0.454099	0.0607435	0.454099	0.0606353			0.430549	0.0582584	0.432465	0.0593343	0.440249	0.0609173	0.449926	0.0605677	0.434949	0.0594705
				0.424708	0.0574489	0.438786	0.0590909	0.453002	0.0607355	0.467359	0.0623827	0.481858	0.0640324	0.456566	0.0610268	0.456566	0.060918			0.430299	0.0580651	0.432135	0.0590976	0.439897	0.0606846	0.449581	0.0603016	0.434586	0.0591977
				0.424692	0.0574338	0.438769	0.0590754	0.452985	0.0607196	0.467341	0.0623663	0.481839	0.0640155	0.459037	0.0613101	0.459037	0.0612008			0.430572	0.057907	0.432486	0.0588935	0.440265	0.060479	0.449961	0.0600886	0.434978	0.0589681
				0.424708	0.0574187	0.438786	0.0590599	0.453002	0.0607036	0.467359	0.0623498	0.481858	0.0639987	0.461512	0.0615935	0.461512	0.0614837			0.431358	0.05779	0.433505	0.05873	0.441338	0.0603083	0.451052	0.059937	0.43611	0.0587906
				0.424756	0.0574042	0.438835	0.0590449	0.453054	0.0606882	0.467413	0.0623341	0.481913	0.0639825	0.463991	0.0618769	0.463991	0.0617666			0.432628	0.0577189	0.435152	0.0586131	0.443075	0.0601791	0.45281	0.0598525	0.437939	0.0586719
				0.424834	0.0573908	0.438916	0.0590312	0.453137	0.0606741	0.467499	0.0623195	0.482003	0.0639675	0.466475	0.0621605	0.466475	0.0620496			0.43433	0.0576961	0.437364	0.0585475	0.44541	0.0600965	0.45517	0.0598384	0.440394	0.0586167
				0.424938	0.0573791	0.439025	0.0590191	0.45325	0.0606617	0.467616	0.0623068	0.482124	0.0639544	0.468963	0.0624441	0.468963	0.0623327			0.436402	0.0577227	0.440056	0.0585356	0.448251	0.0600635	0.458039	0.0598953	0.443381	0.0586269
				0.425066	0.0573695	0.439157	0.0590092	0.453387	0.0606515	0.467758	0.0622963	0.482271	0.0639437	0.471455	0.0627278	0.471455	0.0626159			0.438762	0.0577977	0.443125	0.0585779	0.451491	0.0600814	0.461308	0.0600209	0.446785	0.0587023
				0.425211	0.0573623	0.439308	0.0590018	0.453544	0.0606439	0.467921	0.0622885	0.48244	0.0639357	0.473951	0.0630115	0.473951	0.0628991			0.44132	0.057918	0.446453	0.0586729	0.455005	0.0601495	0.464852	0.0602105	0.450476	0.05884
				0.425369	0.0573579	0.439472	0.0589973	0.453714	0.0606392	0.468097	0.0622837	0.482622	0.0639307	0.476451	0.0632954	0.476451	0.0631824			0.443979	0.0580792	0.449911	0.0588167	0.458658	0.0602653	0.468533	0.0604567	0.454311	0.0590346
				0.425533	0.0573564	0.439642	0.0589958	0.45389	0.0606377	0.46828	0.0622821	0.482812	0.0639291	0.478956	0.0635793	0.478956	0.0634658			0.446634	0.0582749	0.453368	0.059004	0.462309	0.0604243	0.472211	0.0607501	0.458143	0.0592787
				0.425697	0.0573579	0.439812	0.0589973	0.454067	0.0606392	0.468463	0.0622837	0.483001	0.0639307	0.481465	0.0638633	0.481465	0.0637493			0.449186	0.0584978	0.456689	0.0592275	0.465817	0.0606203	0.475744	0.0610794	0.461826	0.0595628
				0.425855	0.0573623	0.439976	0.0590018	0.454237	0.0606439	0.468639	0.0622885	0.483184	0.0639357	0.483978	0.0641473	0.483978	0.0640329			0.451535	0.0587392	0.459748	0.0594786	0.46905	0.0608459	0.478997	0.061432	0.465216	0.0598762
				0.426001	0.0573695	0.440127	0.0590092	0.454394	0.0606515	0.468801	0.0622963	0.483352	0.0639437	0.486496	0.0644315	0.486496	0.0643165			0.453591	0.0589898	0.462427	0.0597476	0.471881	0.0610923	0.481844	0.0617943	0.468185	0.0602066
				0.426128	0.0573791	0.440259	0.0590191	0.454531	0.0606617	0.468944	0.0623068	0.483499	0.0639544	0.489017	0.0647157	0.489017	0.0646002			0.455276	0.05924	0.464622	0.0600243	0.474202	0.0613501	0.484176	0.0621524	0.470618	0.0605415
				0.426233	0.0573908	0.440368	0.0590312	0.454643	0.0606741	0.46906	0.0623195	0.48362	0.0639675	0.491543	0.065	0.491543	0.0648839			0.456524	0.0594803	0.466251	0.060298	0.475925	0.0616094	0.485904	0.0624925	0.472421	0.060868
				0.426311	0.0574042	0.440449	0.0590449	0.454727	0.0606882	0.469147	0.0623341	0.48371	0.0639825	0.491543	0.065	0.492578	0.065			0.457288	0.0597013	0.467249	0.0605582	0.476982	0.0618602	0.48696	0.0628015	0.473525	0.0611735
				0.426358	0.0574187	0.440498	0.0590599	0.454779	0.0607036	0.4692	0.0623498	0.483765	0.0639987	IsoLine	IsoLine	0.490514	0.065			0.457538	0.0598946	0.467579	0.0607949	0.477333	0.0620929	0.487305	0.0630676	0.473889	0.0614462
				0.426375	0.0574338	0.440515	0.0590754	0.454796	0.0607196	0.469218	0.0623663	0.483784	0.0640155			0.489017	0.0648312			ErrEll	ErrEll	ErrEll	ErrEll	ErrEll	ErrEll	ErrEll	ErrEll	ErrEll	ErrEll
				ConcTikEll	ConcTikEll	ConcTikEll	ConcTikEll	ConcTikEll	ConcTikEll	ConcTikEll	ConcTikEll	ConcTikEll	ConcTikEll			0.486496	0.0645465
																0.483978	0.0642618
																0.481465	0.0639772
																0.478956	0.0636927
																0.476451	0.0634083
																0.473951	0.0631239
																0.471455	0.0628397
																0.468963	0.0625554
																0.466475	0.0622713
																0.463991	0.0619873
																0.461512	0.0617033
																0.459037	0.0614194
																0.456566	0.0611355
																0.454099	0.0608518
																0.451637	0.0605681
																0.449178	0.0602845
																0.446724	0.060001
																0.444274	0.0597175
																0.441828	0.0594342
																0.439386	0.0591509
																0.436948	0.0588676
																0.434515	0.0585845
																0.432086	0.0583014
																0.42966	0.0580184
																0.427239	0.0577355
																0.424822	0.0574527
																0.422409	0.0571699
																0.42	0.0568872
																0.42	0.0568872
																0.42	0.0566852
																ConcBand	ConcBand

## Sheet: PlotDat7
Source sheet	all data	0.420018	0.0559001	0.39	0.0532378	0.384031	0.0525242	0.437551	0.0567507	0.435374	0.0567971	0.442443	0.057972	0.457538	0.0598946	0.467579	0.0607949	0.477333	0.0620929	0.487305	0.0630676	0.420018	0.0559001	0.437551	0.0567507	0.435374	0.0567971	0.442443	0.057972	0.420018	0.0559001	0.434001	0.0569763	0.422273	0.0563976	0.449857	0.0599462	0.467579	0.0607949	0.477333	0.0620929	0.487305	0.0630676	0.449857	0.0599462	0.471718	0.0615833	0.458896	0.0609198
Plot name	Concordia3	0.419893	0.0559609	0.39	0.0532378	0.390863	0.0533409	0.437303	0.0569234	0.435154	0.0569519	0.44221	0.0581335	0.457342	0.0600304	0.467329	0.0609692	0.477071	0.0622682	0.487109	0.0632251	0.419893	0.0559609	0.437303	0.0569234	0.435154	0.0569519	0.44221	0.0581335	0.419893	0.0559609	0.433835	0.0570924	IsoLine	IsoLine	0.458615	0.0613887	0.467329	0.0609692	0.477071	0.0622682	0.487109	0.0632251	0.458615	0.0613887	0.471536	0.0617105	IsoLine	IsoLine
Plot Type	1	0.425951	0.0572288	0.393384	0.0536412	0.397729	0.0541582	0.436583	0.0570681	0.434518	0.0570796	0.441534	0.0582703	0.45678	0.0601375	0.466601	0.0611156	0.476305	0.0624195	0.486549	0.0633525	0.425951	0.0572288	0.436583	0.0570681	0.434518	0.0570796	0.441534	0.0582703	0.425951	0.0572288	0.433353	0.0571896			0.468443	0.0616846	0.466601	0.0611156	0.476305	0.0624195	0.486549	0.0633525	0.468443	0.0616846	0.47101	0.061816
1st free col	51	0.443918	0.0589799	0.396775	0.0540448	0.404629	0.0549761	0.435412	0.057181	0.433483	0.0571768	0.440433	0.0583788	0.455867	0.060213	0.465417	0.0612302	0.475057	0.0625427	0.485638	0.0634475	IsoLine	IsoLine	0.435412	0.057181	0.433483	0.0571768	0.440433	0.0583788	IsoLine	IsoLine	0.43257	0.0572651			IsoLine	IsoLine	0.465417	0.0612302	0.475057	0.0625427	0.485638	0.0634475	IsoLine	IsoLine	0.470153	0.0618971
Sigma Level	2	0.449857	0.0599462	0.400176	0.0544486	0.411563	0.0557947	0.433821	0.057259	0.432077	0.0572408	0.438936	0.0584559	0.454629	0.0602549	0.463809	0.0613097	0.473361	0.0626344	0.484391	0.0635082			0.433821	0.057259	0.432077	0.0572408	0.438936	0.0584559			0.431505	0.0573171					0.463809	0.0613097	0.473361	0.0626344	0.484391	0.0635082			0.468988	0.0619516
Absolute Errs	FALSE	0.458615	0.0613887	0.403584	0.0548524	0.418531	0.0566139	0.431853	0.0572998	0.430338	0.0572699	0.437086	0.0584995	0.453098	0.0602621	0.46182	0.061352	0.471262	0.0626922	0.482834	0.0635333			0.431853	0.0572998	0.430338	0.0572699	0.437086	0.0584995			0.430189	0.0573439					0.46182	0.061352	0.471262	0.0626922	0.482834	0.0635333			0.467549	0.0619779
Symbol Type	1	0.468443	0.0616846	0.407001	0.0552565	0.425533	0.0574338	0.429562	0.0573025	0.428315	0.0572633	0.434932	0.0585084	0.451317	0.0602342	0.459505	0.061356	0.468818	0.0627144	0.480997	0.0635225			0.429562	0.0573025	0.428315	0.0572633	0.434932	0.0585084			0.428656	0.0573449					0.459505	0.061356	0.468818	0.0627144	0.480997	0.0635225			0.465873	0.0619753
Inverse Plot	FALSE	IsoLine	IsoLine	0.410426	0.0556607	0.43257	0.0582543	0.427011	0.057267	0.426062	0.0572212	0.432533	0.0584824	0.449334	0.0601721	0.456926	0.0613215	0.466096	0.0627004	0.478916	0.063476			0.427011	0.057267	0.426062	0.0572212	0.432533	0.0584824			0.42695	0.0573201					0.456926	0.0613215	0.466096	0.0627004	0.478916	0.063476			0.464007	0.061944
Color Plot	FALSE			0.413859	0.056065	0.439642	0.0590754	0.424269	0.0571941	0.42364	0.0571447	0.429954	0.0584223	0.447203	0.0600775	0.454155	0.0612495	0.463169	0.0626506	0.476631	0.0633945			0.424269	0.0571941	0.42364	0.0571447	0.429954	0.0584223			0.425116	0.0572701					0.454155	0.0612495	0.463169	0.0626506	0.476631	0.0633945			0.462002	0.0618847
3D plot	FALSE			0.417301	0.0564695	0.446749	0.0598971	0.421412	0.057086	0.421117	0.0570359	0.427266	0.0583296	0.444982	0.059953	0.451267	0.061142	0.460119	0.0625665	0.474186	0.0632798			0.421412	0.057086	0.421117	0.0570359	0.427266	0.0583296			0.423204	0.0571963					0.451267	0.061142	0.460119	0.0625665	0.474186	0.0632798			0.459912	0.0617991
Linear	FALSE			0.420751	0.0568742	0.45389	0.0607196	0.418516	0.0569455	0.41856	0.0568978	0.424543	0.0582068	0.442733	0.0598019	0.44834	0.0610018	0.457028	0.0624502	0.47163	0.063134			0.418516	0.0569455	0.41856	0.0568978	0.424543	0.0582068			0.421267	0.0571008					0.44834	0.0610018	0.457028	0.0624502	0.47163	0.063134			0.457794	0.0616895
Data Range	AA4:AE10			0.424209	0.057279	0.461067	0.0615426	0.415661	0.0567765	0.416039	0.0567341	0.421857	0.0580574	0.440516	0.0596284	0.445454	0.0608329	0.453979	0.0623049	0.469011	0.06296			0.415661	0.0567765	0.416039	0.0567341	0.421857	0.0580574			0.419358	0.056986					0.445454	0.0608329	0.453979	0.0623049	0.469011	0.06296			0.455706	0.0615589
Filled Symbols	FALSE			0.427676	0.057684	0.46828	0.0623663	0.412925	0.0565836	0.413624	0.0565493	0.419284	0.0578854	0.438392	0.0594372	0.442689	0.0606397	0.451058	0.0621347	0.466382	0.0627612			0.412925	0.0565836	0.413624	0.0565493	0.419284	0.0578854			0.417528	0.0568552					0.442689	0.0606397	0.451058	0.0621347	0.466382	0.0627612			0.453706	0.0614109
ConcAge	TRUE			0.431151	0.0580891	0.475528	0.0631906	0.410383	0.056372	0.41138	0.0563485	0.416892	0.0576954	0.436418	0.0592336	0.440119	0.0604277	0.448342	0.0619441	0.463793	0.0625415			0.410383	0.056372	0.41138	0.0563485	0.416892	0.0576954			0.415827	0.056712					0.440119	0.0604277	0.448342	0.0619441	0.463793	0.0625415			0.451846	0.0612495
ConcSwap	FALSE			0.434635	0.0584944	0.482812	0.0640155	0.408103	0.0561476	0.409367	0.0561372	0.414747	0.0574928	0.434649	0.059023	0.437815	0.0602025	0.445907	0.0617384	0.461294	0.062305			0.408103	0.0561476	0.409367	0.0561372	0.414747	0.0574928			0.414302	0.0565601					0.437815	0.0602025	0.445907	0.0617384	0.461294	0.062305			0.450179	0.0610791
1st Symbol-row	1			0.438127	0.0588998	0.490131	0.0648411	0.406149	0.0559164	0.407642	0.055921	0.412908	0.0572829	0.433133	0.0588112	0.435839	0.0599703	0.443818	0.0615231	0.458934	0.0620565			0.406149	0.0559164	0.407642	0.055921	0.412908	0.0572829			0.412995	0.0564038					0.435839	0.0599703	0.443818	0.0615231	0.458934	0.0620565			0.44875	0.0609043
				0.441628	0.0593054	IsoLine	IsoLine	0.404572	0.0556848	0.406251	0.0557059	0.411425	0.0570716	0.431911	0.058604	0.434245	0.0597375	0.442133	0.0613042	0.45676	0.0618007			0.404572	0.0556848	0.406251	0.0557059	0.411425	0.0570716			0.411941	0.0562474					0.434245	0.0597375	0.442133	0.0613042	0.45676	0.0618007			0.447598	0.06073
				0.445138	0.0597111			0.403417	0.055459	0.405232	0.0554977	0.410338	0.0568645	0.431017	0.0584071	0.433078	0.0595103	0.440898	0.0610875	0.454813	0.0615427			0.403417	0.055459	0.405232	0.0554977	0.410338	0.0568645			0.411168	0.056095					0.433078	0.0595103	0.440898	0.0610875	0.454813	0.0615427			0.446754	0.0605609
				0.448655	0.060117			0.402715	0.0552453	0.404613	0.0553022	0.409677	0.0566674	0.430474	0.0582258	0.432368	0.0592951	0.440146	0.0608791	0.453131	0.0612875			0.402715	0.0552453	0.404613	0.0553022	0.409677	0.0566674			0.410699	0.0559509					0.432368	0.0592951	0.440146	0.0608791	0.453131	0.0612875			0.446241	0.0604015
				0.452182	0.0605231			0.402485	0.0550495	0.404411	0.0551247	0.40946	0.0564856	0.430299	0.0580651	0.432135	0.0590976	0.439897	0.0606846	0.451747	0.06104			0.402485	0.0550495	0.404411	0.0551247	0.40946	0.0564856			0.410545	0.055819					0.432135	0.0590976	0.439897	0.0606846	0.451747	0.06104			0.446073	0.0602563
				0.455717	0.0609293			0.402733	0.0548768	0.404631	0.05497	0.409693	0.0563241	0.430494	0.0579293	0.432386	0.0589233	0.44016	0.0605093	0.450688	0.060805			0.402733	0.0548768	0.404631	0.05497	0.409693	0.0563241			0.410711	0.0557029					0.432386	0.0589233	0.44016	0.0605093	0.450688	0.060805			0.446255	0.0601291
				0.45926	0.0613357			0.403453	0.054732	0.405268	0.0548423	0.410369	0.0561872	0.431056	0.0578222	0.433113	0.0587768	0.440925	0.060358	0.449975	0.0605871			0.403453	0.054732	0.405268	0.0548423	0.410369	0.0561872			0.411193	0.0556057					0.433113	0.0587768	0.440925	0.060358	0.449975	0.0605871			0.446781	0.0600236
				0.462813	0.0617422			0.404624	0.0546192	0.406303	0.0547451	0.41147	0.0560788	0.431969	0.0577467	0.434297	0.0586623	0.442173	0.0602348	0.449621	0.0603906			0.404624	0.0546192	0.406303	0.0547451	0.41147	0.0560788			0.411976	0.0555301					0.434297	0.0586623	0.442173	0.0602348	0.449621	0.0603906			0.447639	0.0599424
				0.466373	0.0621489			0.406215	0.0545412	0.407709	0.0546811	0.412966	0.0560017	0.433208	0.0577048	0.435905	0.0585828	0.44387	0.0601431	0.449634	0.0602193			0.406215	0.0545412	0.407709	0.0546811	0.412966	0.0560017			0.413041	0.0554782					0.435905	0.0585828	0.44387	0.0601431	0.449634	0.0602193			0.448803	0.059888
				0.469943	0.0625557			0.408183	0.0545003	0.409448	0.054652	0.414817	0.0559581	0.434738	0.0576976	0.437894	0.0585405	0.445969	0.0600853	0.450012	0.0600765			0.408183	0.0545003	0.409448	0.054652	0.414817	0.0559581			0.414357	0.0554513					0.437894	0.0585405	0.445969	0.0600853	0.450012	0.0600765			0.450242	0.0598617
				0.473521	0.0629627			0.410474	0.0544976	0.411471	0.0546586	0.416971	0.0559492	0.43652	0.0577255	0.440209	0.0585365	0.448413	0.0600631	0.45075	0.059965			0.410474	0.0544976	0.411471	0.0546586	0.416971	0.0559492			0.41589	0.0554503					0.440209	0.0585365	0.448413	0.0600631	0.45075	0.059965			0.451918	0.0598642
				0.477108	0.0633699			0.413025	0.0545332	0.413724	0.0547007	0.41937	0.0559751	0.438503	0.0577876	0.442788	0.058571	0.451135	0.0600771	0.451831	0.059887			0.413025	0.0545332	0.413724	0.0547007	0.41937	0.0559751			0.417596	0.0554751					0.442788	0.058571	0.451135	0.0600771	0.451831	0.059887			0.453784	0.0598956
				0.480704	0.0637772			0.415767	0.054606	0.416145	0.0547772	0.421948	0.0560353	0.440633	0.0578822	0.445559	0.058643	0.454061	0.0601269	0.453237	0.059844			0.415767	0.054606	0.416145	0.0547772	0.421948	0.0560353			0.41943	0.0555251					0.445559	0.058643	0.454061	0.0601269	0.453237	0.059844			0.455789	0.0599549
				0.484308	0.0641846			0.418624	0.0547142	0.418669	0.054886	0.424636	0.056128	0.442854	0.0580067	0.448448	0.0587505	0.457112	0.060211	0.454938	0.0598368			0.418624	0.0547142	0.418669	0.054886	0.424636	0.056128			0.421342	0.0555989					0.448448	0.0587505	0.457112	0.060211	0.454938	0.0598368			0.457879	0.0600405
				0.487921	0.0645922			0.42152	0.0548547	0.421226	0.0550241	0.42736	0.0562508	0.445103	0.0581578	0.451374	0.0588907	0.460203	0.0603273	0.456902	0.0598656			0.42152	0.0548547	0.421226	0.0550241	0.42736	0.0562508			0.423278	0.0556945					0.451374	0.0588907	0.460203	0.0603273	0.456902	0.0598656			0.459997	0.06015
				0.491543	0.065			0.424375	0.0550237	0.423746	0.0551877	0.430045	0.0564002	0.44732	0.0583313	0.45426	0.0590596	0.463251	0.0604726	0.45909	0.0599297			0.424375	0.0550237	0.423746	0.0551877	0.430045	0.0564002			0.425188	0.0558092					0.45426	0.0590596	0.463251	0.0604726	0.45909	0.0599297			0.462085	0.0602806
				0.491543	0.065			0.427111	0.0552166	0.426162	0.0553725	0.432619	0.0565722	0.449444	0.0585225	0.457026	0.0592528	0.466173	0.0606428	0.461461	0.060028			0.427111	0.0552166	0.426162	0.0553725	0.432619	0.0565722			0.427018	0.05594					0.457026	0.0592528	0.466173	0.0606428	0.461461	0.060028			0.464086	0.0604287
				IsoLine	IsoLine			0.429653	0.0554282	0.428406	0.0555733	0.435011	0.0567621	0.451418	0.0587262	0.459595	0.0594648	0.468889	0.0608334	0.463967	0.0601586			0.429653	0.0554282	0.428406	0.0555733	0.435011	0.0567621			0.428719	0.0560833					0.459595	0.0594648	0.468889	0.0608334	0.463967	0.0601586			0.465945	0.0605901
								0.431933	0.0556526	0.430418	0.0557847	0.437155	0.0569648	0.453187	0.0589367	0.4619	0.05969	0.471324	0.0610391	0.466561	0.0603189			0.431933	0.0556526	0.430418	0.0557847	0.437155	0.0569648			0.430243	0.0562351					0.4619	0.05969	0.471324	0.0610391	0.466561	0.0603189			0.467612	0.0607605
								0.433887	0.0558838	0.432143	0.0560009	0.438994	0.0571747	0.454703	0.0591485	0.463876	0.0599222	0.473412	0.0612544	0.469191	0.0605057			0.433887	0.0558838	0.432143	0.0560009	0.438994	0.0571747			0.431551	0.0563914					0.463876	0.0599222	0.473412	0.0612544	0.469191	0.0605057			0.469041	0.0609352
								0.435464	0.0561154	0.433534	0.056216	0.440477	0.057386	0.455925	0.0593557	0.465469	0.060155	0.475097	0.0614733	0.471807	0.0607155			0.435464	0.0561154	0.433534	0.056216	0.440477	0.057386			0.432605	0.0565479					0.465469	0.060155	0.475097	0.0614733	0.471807	0.0607155			0.470193	0.0611096
								0.436619	0.0563411	0.434553	0.0564241	0.441564	0.0575931	0.456819	0.0595526	0.466636	0.0603821	0.476333	0.06169	0.474357	0.0609442			0.436619	0.0563411	0.434553	0.0564241	0.441564	0.0575931			0.433378	0.0567002					0.466636	0.0603821	0.476333	0.06169	0.474357	0.0609442			0.471037	0.0612787
								0.437321	0.0565549	0.435172	0.0566196	0.442225	0.0577902	0.457362	0.0597339	0.467346	0.0605974	0.477085	0.0618984	0.476793	0.0611873			0.437321	0.0565549	0.435172	0.0566196	0.442225	0.0577902			0.433847	0.0568443					0.467346	0.0605974	0.477085	0.0618984	0.476793	0.0611873			0.471551	0.0614381
								0.437551	0.0567507	0.435374	0.0567971	0.442443	0.057972	0.457538	0.0598946	0.467579	0.0607949	0.477333	0.0620929	0.479065	0.06144			0.437551	0.0567507	0.435374	0.0567971	0.442443	0.057972			0.434001	0.0569763					0.467579	0.0607949	0.477333	0.0620929	0.479065	0.06144			0.471718	0.0615833
								Black	Black	Black	Black	Black	Black	Black	Black	Black	Black	Black	Black	0.481131	0.0616975			Black	Black	Black	Black	Black	Black									Black	Black	Black	Black	0.481131	0.0616975
																				0.48295	0.0619548																					0.48295	0.0619548
																				0.484487	0.0622068																					0.484487	0.0622068
																				0.485711	0.0624486																					0.485711	0.0624486
																				0.486599	0.0626756																					0.486599	0.0626756
																				0.487134	0.0628833																					0.487134	0.0628833
																				0.487305	0.0630676																					0.487305	0.0630676
																				Black	Black																					Black	Black

[truncated: 6 more sheets: PlotDat9, PlotDat10, PlotDat8, PlotDat11, PlotDat13, data table]
