# Supplementary material for: A tectonic carpet of Variscan flysch at the base of a rootless accretionary prism in northwestern Iberia: U–Pb zircon age constrains from sediments and volcanic olistoliths
Source: Copernicus journal article supplement (doi:10.5194/se-12-835-2021), 2021-04-15
Supplement: Supplementary file 5 [file se-12-835-2021-supplement.zip › SUPP TABLES/Supplementary Table 4_EC-PO-293.xls]

## Sheet: PlotDat3
Source sheet	all data	0.524681	0.068398	0	0	0.217708	0.0315113	0.61165	0.0754328	0.618343	0.0795708	0.705733	0.08503	0.705847	0.0859665	0.687863	0.0879856	0.6664	0.0861167	0.695272	0.0888912	0.738655	0.0864976	0.737008	0.0883303	0.738909	0.0903359	0.810527	0.090903	0.799674	0.0954442	0.773105	0.0963061	0.79217	0.0967506	0.769106	0.0971016	0.808079	0.0957511	0.82279	0.0952239	0.814359	0.0977551	0.831689	0.0963687	0.800053	0.0993571	0.827175	0.0989345
Plot name	Concordia0	0.544328	0.0717094	0.110692	0.0166736	0.482812	0.0640155	0.608003	0.0766897	0.615231	0.0803306	0.701617	0.086329	0.702055	0.0870485	0.684554	0.0885553	0.661877	0.0879695	0.692023	0.0892977	0.733725	0.0883597	0.732646	0.0898712	0.735244	0.0910103	0.804887	0.0929684	0.795635	0.0963716	0.769485	0.0966609	0.78805	0.0977233	0.765492	0.0975137	0.803226	0.0974267	0.817656	0.0970622	0.810527	0.0983093	0.826514	0.0982077	0.796373	0.0996066	0.822509	0.100407
Plot Type	1	0.607533	0.0767298	0.233637	0.0336251	0.805631	0.097544	0.597605	0.0772749	0.606374	0.080392	0.689879	0.0868504	0.69125	0.0873691	0.67511	0.0883486	0.648954	0.0890946	0.682725	0.088925	0.719571	0.0895391	0.720182	0.0906716	0.724771	0.0908695	0.788655	0.0943177	0.784102	0.0964551	0.759096	0.0961604	0.776298	0.0978171	0.755136	0.0970657	0.789359	0.0982734	0.802946	0.0981101	0.799553	0.0980084	0.811693	0.0992359	0.785792	0.0989817	0.809197	0.10101
1st free col	211	0.615476	0.0776503	0.370191	0.0508594	1.19873	0.132129	0.581299	0.0771409	0.592491	0.07975	0.671469	0.0865518	0.674306	0.0869023	0.660295	0.0873823	0.62868	0.0894008	0.668131	0.0878032	0.69734	0.0899402	0.700626	0.0906666	0.70834	0.0899249	0.763147	0.0948419	0.76601	0.0956879	0.742782	0.0948452	0.757868	0.0970245	0.738878	0.0957938	0.7676	0.0982226	0.779852	0.0982827	0.782324	0.0968766	0.788427	0.0993702	0.769166	0.0975332	0.788318	0.100694
Sigma Level	2	0.608817	0.0789719	0.521861	0.0683809	1.67741	0.167804	0.560407	0.0762986	0.574705	0.0784566	0.64788	0.0854575	0.652596	0.0856861	0.64131	0.0857346	0.602697	0.0888635	0.649423	0.0860232	0.668832	0.0895304	0.675562	0.0898566	0.68728	0.0882531	0.730429	0.0944982	0.742824	0.0941323	0.721863	0.092822	0.734251	0.0954096	0.718034	0.0938011	0.739713	0.0972785	0.750245	0.097566	0.760237	0.0950057	0.758601	0.0985996	0.747844	0.0953783	0.761562	0.099486
Absolute Errs	FALSE	0.558208	0.0789875	0.690319	0.0861946	2.2603	0.204603	0.53662	0.0748163	0.554459	0.0766166	0.621023	0.0836562	0.627878	0.0838188	0.619692	0.083539	0.573109	0.087526	0.628117	0.0837291	0.636357	0.088343	0.647021	0.0883074	0.663299	0.0859894	0.693151	0.0933147	0.716423	0.0919141	0.698034	0.0902545	0.707362	0.0931033	0.694293	0.0912491	0.707957	0.0955175	0.716524	0.0960182	0.735081	0.0925472	0.724631	0.0969865	0.723551	0.0926916	0.731098	0.0974824
Symbol Type	1	0.617351	0.0796785	0.877425	0.104305	2.97009	0.242562	0.511866	0.072814	0.533392	0.074379	0.593072	0.0812937	0.602156	0.0814517	0.597194	0.0809734	0.542314	0.0854968	0.605938	0.0811069	0.602546	0.0864742	0.617315	0.0861443	0.638339	0.0833173	0.654334	0.0913871	0.688946	0.0892132	0.673226	0.0873507	0.679378	0.0902924	0.669579	0.0883444	0.674905	0.0930823	0.68142	0.0937646	0.708894	0.0897003	0.689269	0.0946617	0.698257	0.0896909	0.699393	0.0948462
Inverse Plot	FALSE	0.619865	0.0799318	1.08524	0.122718	3.83441	0.281716	0.48815	0.0704539	0.513211	0.0719252	0.566293	0.0785615	0.577512	0.0787767	0.575637	0.0782457	0.512807	0.0829403	0.584685	0.078369	0.570138	0.0840754	0.58885	0.0835426	0.614422	0.0804533	0.617123	0.0888717	0.662618	0.0862484	0.649448	0.0843461	0.652567	0.0872047	0.645893	0.0853225	0.643233	0.0901701	0.647778	0.0909877	0.683797	0.0866957	0.65538	0.0918135	0.67401	0.0866191	0.669016	0.0917908
Color Plot	TRUE	0.632641	0.0807307	1.31606	0.141438	4.8869	0.322105	0.467394	0.0679273	0.495551	0.0694538	0.542855	0.0756809	0.555945	0.0760105	0.556768	0.0755768	0.486978	0.0800635	0.566077	0.0757372	0.541759	0.0813408	0.563934	0.0807131	0.593486	0.0776294	0.584532	0.0859722	0.639573	0.0832598	0.628628	0.0814838	0.629101	0.0840902	0.625155	0.0824281	0.615509	0.087017	0.618322	0.0879126	0.661824	0.0837767	0.625709	0.0886726	0.652775	0.0837251	0.642428	0.0885638
3D plot	FALSE	0.651216	0.080948	1.57243	0.16047	6.16853	0.363766	0.451279	0.0654388	0.481843	0.0671653	0.524657	0.0728852	0.5392	0.073377	0.542116	0.073183	0.466919	0.0770995	0.551624	0.0734247	0.519707	0.0784922	0.544583	0.0778851	0.577227	0.0750743	0.559201	0.0829235	0.621678	0.0804895	0.61245	0.0789959	0.610881	0.0812014	0.609045	0.0798957	0.593978	0.0838783	0.59544	0.0847884	0.644755	0.0811798	0.602661	0.0854935	0.636273	0.0812434	0.621783	0.0854266
Linear	FALSE	0.674151	0.0841308	1.85718	0.179819	7.72917	0.40674	0.44111	0.0631901	0.473196	0.0652448	0.513173	0.070401	0.528634	0.0710898	0.532867	0.0712581	0.454256	0.0742885	0.542495	0.0716188	0.505769	0.0757601	0.532366	0.0752876	0.566962	0.0729951	0.543183	0.0799726	0.610382	0.078162	0.602227	0.0770839	0.599383	0.0787721	0.598867	0.0779304	0.580385	0.0810083	0.580985	0.0818681	0.633972	0.0791155	0.588102	0.0825337	0.625839	0.0793751	0.608754	0.0826334
Data Range	AC3:AG103	0.703137	0.0859551	2.17345	0.199491	9.62957	0.451068	0.437712	0.0613632	0.470313	0.0638481	0.509333	0.0684296	0.525104	0.0693341	0.529772	0.0699582	0.450015	0.0718582	0.539431	0.0704659	0.501075	0.073366	0.528273	0.073131	0.563523	0.0715601	0.537775	0.0773586	0.606601	0.0764659	0.598787	0.0759027	0.595538	0.0769994	0.595447	0.0766916	0.57583	0.0786395	0.576128	0.0793884	0.63035	0.0777509	0.583212	0.080033	0.622319	0.0782715	0.604396	0.0804104
Filled Symbols	FALSE	0.685946	0.0861044	2.52472	0.21949	11.9437	0.496793	0.44136	0.0601063	0.473426	0.0630883	0.513449	0.0671305	0.528896	0.0682521	0.533081	0.0693885	0.454538	0.0700054	0.54268	0.0700593	0.506005	0.0715039	0.532636	0.0715902	0.567188	0.0708857	0.543415	0.0752933	0.61064	0.0755386	0.602407	0.0755479	0.599658	0.0760267	0.599061	0.0762795	0.580683	0.0769639	0.581262	0.0775501	0.634181	0.0771966	0.588388	0.0781941	0.625999	0.078022	0.609061	0.0789378
ConcAge	FALSE	0.693854	0.086875	2.91488	0.239824	14.7617	0.543959	0.451758	0.0595211	0.482282	0.0630269	0.525187	0.0666092	0.539701	0.0679315	0.542525	0.0695951	0.467461	0.0688803	0.551978	0.0704321	0.520158	0.0703245	0.5451	0.0707898	0.577661	0.0710265	0.559647	0.0739439	0.622173	0.0754551	0.612795	0.0760484	0.61141	0.0759329	0.609417	0.0767275	0.59455	0.0761172	0.595972	0.0765022	0.645155	0.0774976	0.603209	0.0771659	0.636581	0.0786469	0.622373	0.0783349
ConcSwap	FALSE	0.682277	0.0868966	3.34823	0.260496	18.1931	0.592611	0.468063	0.0596551	0.496166	0.0636689	0.543596	0.0669077	0.556645	0.0683982	0.55734	0.0705615	0.487735	0.0685741	0.566572	0.0715539	0.54239	0.0699234	0.564656	0.0707948	0.594092	0.0719711	0.585155	0.0734198	0.640265	0.0762223	0.62911	0.0773636	0.629841	0.0767255	0.625676	0.0779994	0.616309	0.0761679	0.619066	0.0763296	0.662384	0.0786294	0.626475	0.0770316	0.653206	0.0800954	0.643253	0.0786504
1st Symbol-row	1	0.691954	0.0871953	3.82955	0.281513	IsoLine	IsoLine	0.488956	0.0604974	0.513951	0.0649623	0.567185	0.068002	0.578356	0.0696145	0.576325	0.0722092	0.513718	0.0691114	0.58528	0.0733339	0.570898	0.0703332	0.58972	0.0716047	0.615152	0.0736429	0.617873	0.0737634	0.663451	0.0777779	0.650029	0.0793869	0.653457	0.0783404	0.64652	0.079992	0.644196	0.0771121	0.648673	0.0770462	0.684471	0.0805003	0.656301	0.0778022	0.674529	0.0822503	0.670008	0.0798589
		0.699459	0.0873061	4.36414	0.30288			0.512743	0.0619797	0.534197	0.0668023	0.594043	0.0698034	0.603073	0.0714818	0.597943	0.0744048	0.543306	0.0704489	0.606586	0.0756279	0.603373	0.0715206	0.618261	0.073154	0.639133	0.0759066	0.655151	0.074947	0.689852	0.079996	0.673858	0.0819544	0.680347	0.0806467	0.67026	0.0825441	0.675952	0.0788731	0.682394	0.0785941	0.709627	0.0829588	0.690271	0.0794153	0.698821	0.084937	0.700473	0.0818624
		0.722354	0.087753	4.95791	0.324604			0.537496	0.063982	0.555264	0.0690399	0.621994	0.0721658	0.628795	0.0738488	0.620441	0.0769703	0.574101	0.0724781	0.628765	0.0782501	0.637184	0.0733894	0.647967	0.0753171	0.664093	0.0785787	0.693967	0.0768745	0.717329	0.0826969	0.698666	0.0848581	0.70833	0.0834576	0.694975	0.0854487	0.709004	0.0813083	0.717498	0.0808477	0.735814	0.0858057	0.725633	0.0817401	0.724115	0.0879377	0.732177	0.0844987
		0.707451	0.0882009	5.6174	0.34669			0.561212	0.0663421	0.575445	0.0714937	0.648773	0.0748981	0.653439	0.0765238	0.641998	0.0796981	0.603608	0.0750347	0.650018	0.080988	0.669592	0.0757882	0.676431	0.0779188	0.688009	0.0814427	0.731179	0.0793899	0.743656	0.0856618	0.722443	0.0878628	0.735141	0.0865453	0.71866	0.0884707	0.740675	0.0842204	0.75114	0.0836245	0.760911	0.0888103	0.759522	0.0845883	0.748362	0.0910095	0.762554	0.0875541
		0.711186	0.0888143	6.3499	0.369144			0.581968	0.0688687	0.593105	0.0739651	0.672211	0.0777787	0.675006	0.0792901	0.660867	0.082367	0.629437	0.0779114	0.668626	0.0836199	0.697971	0.0785228	0.701348	0.0807482	0.708945	0.0842666	0.76377	0.0822894	0.766701	0.0886504	0.743264	0.090725	0.758607	0.0896598	0.739398	0.0913651	0.7684	0.0873736	0.780596	0.0866997	0.782884	0.0917293	0.789192	0.0877292	0.769597	0.0939035	0.789142	0.0907811
		0.715785	0.0896724	7.16348	0.391972			0.598084	0.0713572	0.606813	0.0762536	0.690409	0.0805743	0.691751	0.0819235	0.675519	0.0847608	0.649496	0.0808754	0.683079	0.0859324	0.720023	0.0813714	0.720698	0.0835763	0.725205	0.0868217	0.789101	0.0853381	0.784597	0.0914207	0.759441	0.0932129	0.776828	0.0925486	0.755509	0.0938975	0.789931	0.0905123	0.803478	0.0898239	0.799953	0.0943262	0.812241	0.0909083	0.7861	0.0963852	0.809787	0.0939183
		0.734713	0.0900522	8.06711	0.415182			0.608252	0.0736059	0.61546	0.0781741	0.701893	0.0830585	0.702317	0.0842107	0.684768	0.0866857	0.662159	0.0836864	0.692208	0.0877382	0.73396	0.0841035	0.732915	0.0861738	0.73547	0.0889009	0.805119	0.088289	0.795893	0.0937481	0.769665	0.0951249	0.788326	0.0949778	0.765686	0.0958627	0.803524	0.0933823	0.817933	0.0927442	0.810736	0.0963905	0.826799	0.0938681	0.796533	0.0982535	0.822816	0.0967115
		0.749667	0.0916655	9.07077	0.438778			0.61165	0.0754328	0.618343	0.0795708	0.705733	0.08503	0.705847	0.0859665	0.687863	0.0879856	0.6664	0.0861167	0.695272	0.0888912	0.738655	0.0864976	0.737008	0.0883303	0.738909	0.0903359	0.810527	0.090903	0.799674	0.0954442	0.773105	0.0963061	0.79217	0.0967506	0.769106	0.0971016	0.808079	0.0957511	0.82279	0.0952239	0.814359	0.0977551	0.831689	0.0963687	0.800053	0.0993571	0.827175	0.0989345
		0.72869	0.0916662	10.1855	0.462767
		0.761387	0.0919774	11.4237	0.487157
		0.733325	0.0921488	12.7989	0.511953
		0.762487	0.0932677	14.3263	0.537163
		0.770139	0.0937028	16.0228	0.562793
		0.777902	0.0957478	17.9071	0.58885
		0.818964	0.0976427	20	0.615342
		0.819486	0.0990448	20	0.615342
		0.858501	0.100239	IsoLine	IsoLine
		0.829685	0.10056
		0.852911	0.10059
		0.821626	0.100865
		0.875506	0.102171
		0.849227	0.102513
		0.880839	0.103253
		0.902896	0.104225
		0.857679	0.104552
		0.879595	0.106158
		0.904032	0.108026
		0.954171	0.108073
		0.914266	0.108638
		0.925747	0.111223
		0.951947	0.111704
		0.963249	0.114535
		1.12223	0.127812
		1.17626	0.131451
		1.25863	0.133158
		1.93117	0.183949
		1.9875	0.182575
		2.35345	0.215836
		2.33775	0.211444
		2.29094	0.204935
		2.49089	0.22227
		2.61807	0.217598
		3.16108	0.259729
		2.89681	0.231913
		3.27091	0.252465
		3.7743	0.289458
		4.57223	0.304681
		5.32292	0.346401
		4.75961	0.304947
		5.19783	0.3265
		6.34494	0.382854
		5.47736	0.329173
		6.35845	0.378896
		5.90242	0.35109
		5.47269	0.323484
		6.69926	0.394822
		6.94923	0.40879
		6.7128	0.391832
		5.70158	0.331895
		6.68742	0.388911
		5.83902	0.337729
		6.80159	0.393094
		6.65514	0.3829
		6.7354	0.385642
		7.10789	0.404621
		6.4306	0.365602
		7.19682	0.406384
		6.42018	0.362027
		6.77921	0.381817
		6.89258	0.386379
		7.18547	0.402735
		6.74778	0.373026
		6.74182	0.37209
		7.75636	0.426886
		7.24327	0.395384
		7.59306	0.414084
		7.24051	0.390212
		8.10205	0.423402
		10.042	0.471664
		11.676	0.521621
		10.9138	0.46341
		12.4462	0.526229
		12.8744	0.538796
		12.0187	0.470482
		13.212	0.513015
		13.8261	0.535393
		IsoLine	IsoLine
[truncated: 160 more columns]

## Sheet: PlotDat1
Source sheet	all data	0.524681	0.068398	0	0	0.217708	0.0315113	0.61165	0.0754328	0.618343	0.0795708	0.705733	0.08503	0.705847	0.0859665	0.687863	0.0879856	0.6664	0.0861167	0.695272	0.0888912	0.738655	0.0864976	0.737008	0.0883303	0.738909	0.0903359	0.810527	0.090903	0.799674	0.0954442	0.773105	0.0963061	0.79217	0.0967506	0.769106	0.0971016	0.808079	0.0957511	0.82279	0.0952239	0.814359	0.0977551	0.831689	0.0963687	0.800053	0.0993571	0.827175	0.0989345
Plot name	Concordia1	0.544328	0.0717094	0.0558399	0.00859534	0.482812	0.0640155	0.608003	0.0766897	0.615231	0.0803306	0.701617	0.086329	0.702055	0.0870485	0.684554	0.0885553	0.663932	0.0875414	0.692023	0.0892977	0.735972	0.0879246	0.734628	0.0895286	0.735244	0.0910103	0.807461	0.0924816	0.795635	0.0963716	0.769485	0.0966609	0.78805	0.0977233	0.765492	0.0975137	0.805432	0.0970564	0.819993	0.0966442	0.810527	0.0983093	0.828869	0.0977915	0.796373	0.0996066	0.824627	0.100096
Plot Type	1	0.607533	0.0767298	0.114798	0.0172646	0.805631	0.097544	0.597605	0.0772749	0.606374	0.080392	0.689879	0.0868504	0.69125	0.0873691	0.67511	0.0883486	0.656843	0.0885921	0.682725	0.088925	0.728215	0.0890023	0.727791	0.0903423	0.724771	0.0908695	0.798569	0.0936953	0.784102	0.0964551	0.759096	0.0961604	0.776298	0.0978171	0.755136	0.0970657	0.797825	0.0979308	0.811928	0.0976563	0.799553	0.0980084	0.820742	0.0987951	0.785792	0.0989817	0.817323	0.100801
1st free col	211	0.615476	0.0776503	0.177048	0.0260083	1.19873	0.132129	0.581299	0.0771409	0.592491	0.07975	0.671469	0.0865518	0.674306	0.0869023	0.660295	0.0873823	0.645443	0.0892231	0.668131	0.0878032	0.715722	0.0896836	0.716795	0.0907359	0.70834	0.0899249	0.784239	0.094491	0.76601	0.0956879	0.742782	0.0948452	0.757868	0.0970245	0.738878	0.0957938	0.78559	0.098336	0.798947	0.0982161	0.782324	0.0968766	0.807664	0.0993357	0.769166	0.0975332	0.805581	0.101021
Sigma Level	2	0.608817	0.0789719	0.242774	0.0348272	1.67741	0.167804	0.560407	0.0762986	0.574705	0.0784566	0.64788	0.0854575	0.652596	0.0856861	0.64131	0.0857346	0.63023	0.0894068	0.649423	0.0860232	0.69904	0.0899386	0.702121	0.0906923	0.68728	0.0882531	0.765098	0.0948338	0.742824	0.0941323	0.721863	0.092822	0.734251	0.0954096	0.718034	0.0938011	0.769264	0.0982543	0.781618	0.0982991	0.760237	0.0950057	0.790206	0.0993897	0.747844	0.0953783	0.789914	0.100744
Absolute Errs	FALSE	0.558208	0.0789875	0.31217	0.0437219	2.2603	0.204603	0.53662	0.0748163	0.554459	0.0766166	0.621023	0.0836562	0.627878	0.0838188	0.619692	0.083539	0.61187	0.089135	0.628117	0.0837291	0.678898	0.0897564	0.684411	0.0902133	0.663299	0.0859894	0.741982	0.0947089	0.716423	0.0919141	0.698034	0.0902545	0.707362	0.0931033	0.694293	0.0912491	0.749559	0.0976892	0.760698	0.0979016	0.735081	0.0925472	0.769132	0.0989546	0.723551	0.0926916	0.771008	0.0999834
Symbol Type	1	0.617351	0.0796785	0.385442	0.0526931	2.97009	0.242562	0.511866	0.072814	0.533392	0.074379	0.593072	0.0812937	0.602156	0.0814517	0.597194	0.0809734	0.591165	0.0884198	0.605938	0.0811069	0.656176	0.0891447	0.664438	0.0893199	0.638339	0.0833173	0.715901	0.0941217	0.688946	0.0892132	0.673226	0.0873507	0.679378	0.0902924	0.669579	0.0883444	0.727336	0.0966655	0.737102	0.0970411	0.708894	0.0897003	0.745361	0.0980496	0.698257	0.0896909	0.749688	0.0987722
Inverse Plot	FALSE	0.619865	0.0799318	0.462805	0.0617413	3.83441	0.281716	0.48815	0.0704539	0.513211	0.0719252	0.566293	0.0785615	0.577512	0.0787767	0.575637	0.0782457	0.569019	0.0872924	0.584685	0.078369	0.631867	0.0881304	0.643075	0.088051	0.614422	0.0804533	0.687996	0.0930978	0.662618	0.0862484	0.649448	0.0843461	0.652567	0.0872047	0.645893	0.0853225	0.703567	0.095228	0.711861	0.0957551	0.683797	0.0866957	0.719934	0.0967141	0.67401	0.0866191	0.726886	0.0971633
Color Plot	TRUE	0.632641	0.0807307	0.544488	0.0708673	IsoLine	IsoLine	0.467394	0.0679273	0.495551	0.0694538	0.542855	0.0756809	0.555945	0.0760105	0.556768	0.0755768	0.5464	0.0858019	0.566077	0.0757372	0.607033	0.0867578	0.621256	0.0864623	0.593486	0.0776294	0.659486	0.0916821	0.639573	0.0832598	0.628628	0.0814838	0.629101	0.0840902	0.625155	0.0824281	0.67929	0.0934393	0.686078	0.0940998	0.661824	0.0837767	0.693961	0.0950065	0.652775	0.0837251	0.703599	0.095227
3D plot	FALSE	0.651216	0.080948	0.630731	0.0800718			0.451279	0.0654388	0.481843	0.0671653	0.524657	0.0728852	0.5392	0.073377	0.542116	0.073183	0.524298	0.0840137	0.551624	0.0734247	0.58276	0.0850869	0.599935	0.084623	0.577227	0.0750743	0.631616	0.0899363	0.621678	0.0804895	0.61245	0.0789959	0.610881	0.0812014	0.609045	0.0798957	0.655567	0.0913778	0.66088	0.0921476	0.644755	0.0811798	0.668578	0.0930015	0.636273	0.0812434	0.680845	0.093048
Linear	FALSE	0.674151	0.0841308	0.721791	0.0893554			0.44111	0.0631901	0.473196	0.0652448	0.513173	0.070401	0.528634	0.0710898	0.532867	0.0712581	0.503677	0.0820058	0.542495	0.0716188	0.560109	0.0831906	0.580043	0.0826137	0.566962	0.0729951	0.605606	0.0879367	0.610382	0.078162	0.602227	0.0770839	0.599383	0.0787721	0.598867	0.0779304	0.633434	0.0891334	0.637367	0.0899838	0.633972	0.0791155	0.644893	0.0907867	0.625839	0.0793751	0.659618	0.0907214
Data Range	AC3:AG103	0.703137	0.0859551	0.817936	0.0987188			0.437712	0.0613632	0.470313	0.0638481	0.509333	0.0684296	0.525104	0.0693341	0.529772	0.0699582	0.48544	0.0798659	0.539431	0.0704659	0.540069	0.0811519	0.56245	0.080522	0.563523	0.0715601	0.582591	0.0857709	0.606601	0.0764659	0.598787	0.0759027	0.595538	0.0769994	0.595447	0.0766916	0.613859	0.0868044	0.616569	0.087703	0.63035	0.0777509	0.623943	0.0884589	0.622319	0.0782715	0.640846	0.088349
Filled Symbols	FALSE	0.685946	0.0861044	0.919449	0.108163			0.44136	0.0601063	0.473426	0.0630883	0.513449	0.0671305	0.528896	0.0682521	0.533081	0.0693885	0.470383	0.0776877	0.54268	0.0700593	0.523517	0.0790599	0.547925	0.0784394	0.567188	0.0708857	0.563578	0.0835333	0.61064	0.0755386	0.602407	0.0755479	0.599658	0.0760267	0.599061	0.0762795	0.597697	0.0844925	0.599393	0.0854049	0.634181	0.0771966	0.606642	0.0861198	0.625999	0.078022	0.625349	0.0860344
ConcAge	FALSE	0.693854	0.086875	1.02663	0.117688			0.451758	0.0595211	0.482282	0.0630269	0.525187	0.0666092	0.539701	0.0679315	0.542525	0.0695951	0.459165	0.0755663	0.551978	0.0704321	0.511175	0.077006	0.537102	0.076457	0.577661	0.0710265	0.549397	0.0813219	0.622173	0.0754551	0.612795	0.0760484	0.61141	0.0759329	0.609417	0.0767275	0.585654	0.0822986	0.58659	0.0831898	0.645155	0.0774976	0.593748	0.0838717	0.636581	0.0786469	0.613804	0.0838788
ConcSwap	FALSE	0.682277	0.0868966	1.1398	0.127295			0.468063	0.0596551	0.496166	0.0636689	0.543596	0.0669077	0.556645	0.0683982	0.55734	0.0705615	0.452275	0.0735944	0.566572	0.0715539	0.503584	0.07508	0.530455	0.0746614	0.594092	0.0719711	0.540669	0.0792333	0.640265	0.0762223	0.62911	0.0773636	0.629841	0.0767255	0.625676	0.0779994	0.578257	0.0803188	0.57872	0.0811547	0.662384	0.0786294	0.585822	0.0818128	0.653206	0.0800954	0.606716	0.0819764
1st Symbol-row	1	0.691954	0.0871953	1.25928	0.136984			0.488956	0.0604974	0.513951	0.0649623	0.567185	0.068002	0.578356	0.0696145	0.576325	0.0722092	0.450015	0.0718582	0.58528	0.0733339	0.501075	0.073366	0.528273	0.073131	0.615152	0.0736429	0.537775	0.0773586	0.663451	0.0777779	0.650029	0.0793869	0.653457	0.0783404	0.64652	0.079992	0.57583	0.0786395	0.576128	0.0793884	0.684471	0.0805003	0.583212	0.080033	0.674529	0.0822503	0.604396	0.0804104
		0.699459	0.0873061	1.38544	0.146757			0.512743	0.0619797	0.534197	0.0668023	0.594043	0.0698034	0.603073	0.0714818	0.597943	0.0744048	0.452483	0.0704336	0.606586	0.0756279	0.503758	0.071939	0.530654	0.0719328	0.639133	0.0759066	0.540841	0.07578	0.689852	0.079996	0.673858	0.0819544	0.680347	0.0806467	0.67026	0.0825441	0.578477	0.0773342	0.578925	0.0779681	0.709627	0.0829588	0.586033	0.0786103	0.698821	0.084937	0.606943	0.0792492
		0.722354	0.087753	1.51864	0.156614			0.537496	0.063982	0.555264	0.0690399	0.621994	0.0721658	0.628795	0.0738488	0.620441	0.0769703	0.459572	0.0693828	0.628765	0.0782501	0.511515	0.0708613	0.537491	0.0711191	0.664093	0.0785787	0.549733	0.0745663	0.717329	0.0826969	0.698666	0.0848581	0.70833	0.0834576	0.694975	0.0854487	0.586084	0.0764598	0.58699	0.076956	0.735814	0.0858057	0.594159	0.0776067	0.724115	0.0879377	0.614247	0.0785435
		0.707451	0.0882009	1.65929	0.166555			0.561212	0.0663421	0.575445	0.0714937	0.648773	0.0748981	0.653439	0.0765238	0.641998	0.0796981	0.470972	0.0687518	0.650018	0.080988	0.524007	0.07018	0.548487	0.0707254	0.688009	0.0814427	0.564063	0.0737707	0.743656	0.0856618	0.722443	0.0878628	0.735141	0.0865453	0.71866	0.0884707	0.598318	0.0760546	0.599971	0.0763962	0.760911	0.0888103	0.607238	0.0770661	0.748362	0.0910095	0.62599	0.0783242
		0.711186	0.0888143	1.80778	0.176582			0.581968	0.0688687	0.593105	0.0739651	0.672211	0.0777787	0.675006	0.0792901	0.660867	0.082367	0.486185	0.0685682	0.668626	0.0836199	0.540689	0.069925	0.56316	0.0707691	0.708945	0.0842666	0.583204	0.0734278	0.766701	0.0886504	0.743264	0.090725	0.758607	0.0896598	0.739398	0.0913651	0.614645	0.0761363	0.6173	0.0763132	0.782884	0.0917293	0.624695	0.0770121	0.769597	0.0939035	0.641656	0.0786009
		0.715785	0.0896724	1.96457	0.186695			0.598084	0.0713572	0.606813	0.0762536	0.690409	0.0805743	0.691751	0.0819235	0.675519	0.0847608	0.504545	0.0688399	0.683079	0.0859324	0.560832	0.0701072	0.580871	0.0712481	0.725205	0.0868217	0.60632	0.0735527	0.784597	0.0914207	0.759441	0.0932129	0.776828	0.0925486	0.755509	0.0938975	0.63435	0.0767014	0.638219	0.0767107	0.799953	0.0943262	0.64577	0.0774472	0.7861	0.0963852	0.660563	0.0793615
		0.734713	0.0900522	2.13011	0.196895			0.608252	0.0736059	0.61546	0.0781741	0.701893	0.0830585	0.702317	0.0842107	0.684768	0.0866857	0.525251	0.0695551	0.692208	0.0877382	0.583554	0.0707189	0.600844	0.0721415	0.73547	0.0889009	0.632401	0.0741399	0.795893	0.0937481	0.769665	0.0951249	0.788326	0.0949778	0.765686	0.0958627	0.656573	0.077725	0.661815	0.0775712	0.810736	0.0963905	0.669541	0.0783522	0.796533	0.0982535	0.681883	0.0805727
		0.749667	0.0916655	2.30489	0.207183			0.61165	0.0754328	0.618343	0.0795708	0.705733	0.08503	0.705847	0.0859665	0.687863	0.0879856	0.547397	0.0706826	0.695272	0.0888912	0.607863	0.0717332	0.622207	0.0734103	0.738909	0.0903359	0.660306	0.0751638	0.799674	0.0954442	0.773105	0.0963061	0.79217	0.0967506	0.769106	0.0971016	0.680342	0.0791626	0.687057	0.0788572	0.814359	0.0977551	0.694968	0.0796877	0.800053	0.0993571	0.704684	0.0821816
		0.72869	0.0916662	2.48944	0.217559													0.570015	0.072173			0.632697	0.0731058	0.644025	0.0749991			0.688816	0.0765796									0.704619	0.0809513	0.71284	0.0805125			0.720941	0.0813953			0.727971	0.0841179
		0.761387	0.0919774	2.68428	0.228024													0.592117	0.0739612			0.65697	0.0747768	0.665346	0.0768383			0.716686	0.0783254									0.728342	0.0830128	0.738038	0.0824647			0.746324	0.0834002			0.750725	0.0862969
		0.733325	0.0921488	2.89001	0.23858													0.612738	0.0759692			0.679621	0.076673	0.685238	0.0788477			0.742696	0.0803249									0.750475	0.0852571	0.761551	0.0846284			0.770009	0.085615			0.771952	0.0886235
		0.762487	0.0932677	3.10723	0.249226													0.630975	0.078109			0.699661	0.0787117	0.702831	0.0809394			0.765711	0.0824908									0.77005	0.0875862	0.782349	0.0869092			0.790959	0.0879429			0.790725	0.0909959
		0.770139	0.0937028	3.33658	0.259963													0.646032	0.0802872			0.716213	0.0808037	0.717356	0.0830219			0.784724	0.0847283									0.786212	0.0898981	0.799525	0.0892074			0.80826	0.0902819			0.806222	0.0933105
		0.777902	0.0957478	3.57873	0.270793													0.65725	0.0824086			0.728555	0.0828576	0.728179	0.0850043			0.798905	0.0869397									0.798255	0.0920919	0.812328	0.0914224			0.821154	0.0925301			0.817766	0.0954661
		0.818964	0.0976427	3.83441	0.281716													0.66414	0.0843805			0.736146	0.0847836	0.734827	0.0868			0.807633	0.0890284									0.805651	0.0940718	0.820197	0.0934576			0.82908	0.094589			0.824854	0.0973684
		0.819486	0.0990448	4	0.288474													0.6664	0.0861167			0.738655	0.0864976	0.737008	0.0883303			0.810527	0.090903									0.808079	0.0957511	0.82279	0.0952239			0.831689	0.0963687			0.827175	0.0989345
		0.858501	0.100239	IsoLine	IsoLine
		0.829685	0.10056
		0.852911	0.10059
		0.821626	0.100865
		0.875506	0.102171
		0.849227	0.102513
		0.880839	0.103253
		0.902896	0.104225
		0.857679	0.104552
		0.879595	0.106158
		0.904032	0.108026
		0.954171	0.108073
		0.914266	0.108638
		0.925747	0.111223
		0.951947	0.111704
		0.963249	0.114535
		1.12223	0.127812
		1.17626	0.131451
		1.25863	0.133158
		1.93117	0.183949
		1.9875	0.182575
		2.35345	0.215836
		2.33775	0.211444
		2.29094	0.204935
		2.49089	0.22227
		2.61807	0.217598
		3.16108	0.259729
		2.89681	0.231913
		3.27091	0.252465
		3.7743	0.289458
		4.57223	0.304681
		5.32292	0.346401
		4.75961	0.304947
		5.19783	0.3265
		6.34494	0.382854
		5.47736	0.329173
		6.35845	0.378896
		5.90242	0.35109
		5.47269	0.323484
		6.69926	0.394822
		6.94923	0.40879
		6.7128	0.391832
		5.70158	0.331895
		6.68742	0.388911
		5.83902	0.337729
		6.80159	0.393094
		6.65514	0.3829
		6.7354	0.385642
		7.10789	0.404621
		6.4306	0.365602
		7.19682	0.406384
		6.42018	0.362027
		6.77921	0.381817
		6.89258	0.386379
		7.18547	0.402735
		6.74778	0.373026
		6.74182	0.37209
		7.75636	0.426886
		7.24327	0.395384
		7.59306	0.414084
		7.24051	0.390212
		8.10205	0.423402
		10.042	0.471664
		11.676	0.521621
		10.9138	0.46341
		12.4462	0.526229
		12.8744	0.538796
		12.0187	0.470482
		13.212	0.513015
		13.8261	0.535393
		IsoLine	IsoLine
[truncated: 160 more columns]

## Sheet: PlotDat2
Source sheet	all data	0.524681	0.068398	0	0	0.103498	0.0156334	0.61165	0.0754328	0.618343	0.0795708	0.705733	0.08503	0.705847	0.0859665	0.687863	0.0879856	0.6664	0.0861167	0.695272	0.0888912	0.738655	0.0864976	0.737008	0.0883303	0.738909	0.0903359	0.810527	0.090903	0.799674	0.0954442	0.773105	0.0963061	0.79217	0.0967506	0.769106	0.0971016	0.808079	0.0957511	0.82279	0.0952239	0.814359	0.0977551	0.831689	0.0963687	0.800053	0.0993571	0.827175	0.0989345
Plot name	Concordia0	0.544328	0.0717094	0.0345435	0.00536346	0.217708	0.0315113	0.609658	0.0764169	0.616641	0.0801947	0.703485	0.0860554	0.703776	0.0868318	0.684554	0.0885553	0.663932	0.0875414	0.692023	0.0892977	0.735972	0.0879246	0.734628	0.0895286	0.736909	0.090909	0.807461	0.0924816	0.797469	0.0962049	0.769485	0.0966609	0.78992	0.0975478	0.765492	0.0975137	0.805432	0.0970564	0.819993	0.0966442	0.810527	0.0983093	0.828869	0.0977915	0.796373	0.0996066	0.824627	0.100096
Plot Type	1	0.607533	0.0767298	0.0702803	0.0107557	0.343738	0.0476374	0.603951	0.0770506	0.611779	0.0804478	0.697043	0.0866732	0.697845	0.0872959	0.67511	0.0883486	0.656843	0.0885921	0.682725	0.088925	0.728215	0.0890023	0.727791	0.0903423	0.731164	0.0910469	0.798569	0.0936953	0.791142	0.0965176	0.759096	0.0961604	0.783471	0.0978786	0.755136	0.0970657	0.797825	0.0979308	0.811928	0.0976563	0.799553	0.0980084	0.820742	0.0987951	0.785792	0.0989817	0.817323	0.100801
1st free col	211	0.615476	0.0776503	0.107252	0.0161768	0.482812	0.0640155	0.594781	0.0773061	0.603969	0.080319	0.68669	0.0868564	0.688315	0.0873384	0.660295	0.0873823	0.645443	0.0892231	0.668131	0.0878032	0.715722	0.0896836	0.716795	0.0907359	0.721925	0.0907433	0.784239	0.094491	0.780968	0.0963687	0.742782	0.0948452	0.773106	0.0977285	0.738878	0.0957938	0.78559	0.098336	0.798947	0.0982161	0.782324	0.0968766	0.807664	0.0993357	0.769166	0.0975332	0.805581	0.101021
Sigma Level	2	0.608817	0.0789719	0.1455	0.0216271	0.636279	0.0806498	0.582546	0.0771723	0.593552	0.0798139	0.672877	0.0865971	0.675601	0.0869575	0.64131	0.0857346	0.63023	0.0894068	0.649423	0.0860232	0.69904	0.0899386	0.702121	0.0906923	0.709596	0.0900117	0.765098	0.0948338	0.767393	0.0957646	0.721863	0.092822	0.759277	0.097104	0.718034	0.0938011	0.769264	0.0982543	0.781618	0.0982991	0.760237	0.0950057	0.790206	0.0993897	0.747844	0.0953783	0.789914	0.100744
Absolute Errs	FALSE	0.558208	0.0789875	0.18507	0.0271065	0.805631	0.097544	0.567782	0.076655	0.580984	0.0789546	0.656208	0.0859065	0.66026	0.0861699	0.619692	0.083539	0.61187	0.089135	0.628117	0.0837291	0.678898	0.0897564	0.684411	0.0902133	0.694715	0.0888839	0.741982	0.0947089	0.751009	0.0947319	0.698034	0.0902545	0.742588	0.0960325	0.694293	0.0912491	0.749559	0.0976892	0.760698	0.0979016	0.735081	0.0925472	0.769132	0.0989546	0.723551	0.0926916	0.771008	0.0999834
Symbol Type	1	0.617351	0.0796785	0.226006	0.0326154	0.99251	0.114702	0.551135	0.0757768	0.566813	0.0777787	0.637412	0.0848148	0.642961	0.0850099	0.597194	0.0809734	0.591165	0.0884198	0.605938	0.0811069	0.656176	0.0891447	0.664438	0.0893199	0.677933	0.0874093	0.715901	0.0941217	0.732534	0.0933155	0.673226	0.0873507	0.72377	0.0945607	0.669579	0.0883444	0.727336	0.0966655	0.737102	0.0970411	0.708894	0.0897003	0.745361	0.0980496	0.698257	0.0896909	0.749688	0.0987722
Inverse Plot	FALSE	0.619865	0.0799318	0.268357	0.0381538	1.19873	0.132129	0.533332	0.0745762	0.551661	0.0763375	0.61731	0.0833698	0.624461	0.0835282	0.575637	0.0782457	0.569019	0.0872924	0.584685	0.078369	0.631867	0.0881304	0.643075	0.088051	0.659984	0.0856523	0.687996	0.0930978	0.712773	0.0915775	0.649448	0.0843461	0.703644	0.092753	0.645893	0.0853225	0.703567	0.095228	0.711861	0.0957551	0.683797	0.0866957	0.719934	0.0967141	0.67401	0.0866191	0.726886	0.0971633
Color Plot	TRUE	0.632641	0.0807307	0.31217	0.0437219	1.42629	0.149828	0.51515	0.0731055	0.536187	0.074694	0.59678	0.0816346	0.605568	0.0817896	0.556768	0.0755768	0.5464	0.0858019	0.566077	0.0757372	0.607033	0.0867578	0.621256	0.0864623	0.641651	0.0836897	0.659486	0.0916821	0.692591	0.0895937	0.628628	0.0814838	0.683091	0.0906885	0.625155	0.0824281	0.67929	0.0934393	0.686078	0.0940998	0.661824	0.0837767	0.693961	0.0950065	0.652775	0.0837251	0.703599	0.095227
3D plot	FALSE	0.651216	0.080948	0.357497	0.0493199	1.67741	0.167804	0.497385	0.0714291	0.52107	0.0729201	0.576721	0.079685	0.587109	0.0798702	0.542116	0.073183	0.524298	0.0840137	0.551624	0.0734247	0.58276	0.0850869	0.599935	0.084623	0.623736	0.0816072	0.631616	0.0899363	0.672871	0.0874509	0.61245	0.0789959	0.663007	0.0884572	0.609045	0.0798957	0.655567	0.0913778	0.66088	0.0921476	0.644755	0.0811798	0.668578	0.0930015	0.636273	0.0812434	0.680845	0.093048
Linear	FALSE	0.674151	0.0841308	0.40439	0.0549478	IsoLine	IsoLine	0.480813	0.0696202	0.506968	0.0710933	0.558008	0.0776063	0.569889	0.0778537	0.532867	0.0712581	0.503677	0.0820058	0.542495	0.0716188	0.560109	0.0831906	0.580043	0.0826137	0.607022	0.079496	0.605606	0.0879367	0.654473	0.0852427	0.602227	0.0770839	0.644272	0.0861569	0.598867	0.0779304	0.633434	0.0891334	0.637367	0.0899838	0.633972	0.0791155	0.644893	0.0907867	0.625839	0.0793751	0.659618	0.0907214
Data Range	AC3:AG103	0.703137	0.0859551	0.452903	0.060606			0.466159	0.0677579	0.4945	0.0692934	0.54146	0.0754892	0.554661	0.0758283	0.529772	0.0699582	0.48544	0.0798659	0.539431	0.0704659	0.540069	0.0811519	0.56245	0.080522	0.59224	0.0774482	0.582591	0.0857709	0.638202	0.0830657	0.598787	0.0759027	0.627704	0.0838879	0.595447	0.0766916	0.613859	0.0868044	0.616569	0.087703	0.63035	0.0777509	0.623943	0.0884589	0.622319	0.0782715	0.640846	0.088349
Filled Symbols	FALSE	0.685946	0.0861044	0.503091	0.0662945			0.454062	0.0659236	0.48421	0.0675991	0.527799	0.0734264	0.542091	0.0738826	0.533081	0.0693885	0.470383	0.0776877	0.54268	0.0700593	0.523517	0.0790599	0.547925	0.0784394	0.580035	0.0755534	0.563578	0.0835333	0.624769	0.0810149	0.602407	0.0755479	0.614027	0.0817494	0.599061	0.0762795	0.597697	0.0844925	0.599393	0.0854049	0.634181	0.0771966	0.606642	0.0861198	0.625999	0.078022	0.625349	0.0860344
ConcAge	FALSE	0.693854	0.086875	0.555013	0.0720136			0.445051	0.0641974	0.476546	0.0660845	0.517623	0.071508	0.532729	0.0721015	0.542525	0.0695951	0.459165	0.0755663	0.551978	0.0704321	0.511175	0.077006	0.537102	0.076457	0.570941	0.0738944	0.549397	0.0813219	0.614761	0.0791801	0.612795	0.0760484	0.603839	0.079835	0.609417	0.0767275	0.585654	0.0822986	0.58659	0.0831898	0.645155	0.0774976	0.593748	0.0838717	0.636581	0.0786469	0.613804	0.0838788
ConcSwap	FALSE	0.682277	0.0868966	0.608729	0.0777633			0.439521	0.0626548	0.471846	0.0648156	0.511377	0.0698177	0.526983	0.0705629	0.55734	0.0705615	0.452275	0.0735944	0.566572	0.0715539	0.503584	0.07508	0.530455	0.0746614	0.565356	0.0725436	0.540669	0.0792333	0.608615	0.0776413	0.62911	0.0773636	0.597585	0.0782282	0.625676	0.0779994	0.578257	0.0803188	0.57872	0.0811547	0.662384	0.0786294	0.585822	0.0818128	0.653206	0.0800954	0.606716	0.0819764
1st Symbol-row	1	0.691954	0.0871953	0.6643	0.0835438			0.437712	0.0613632	0.470313	0.0638481	0.509333	0.0684296	0.525104	0.0693341	0.576325	0.0722092	0.450015	0.0718582	0.58528	0.0733339	0.501075	0.073366	0.528273	0.073131	0.563523	0.0715601	0.537775	0.0773586	0.606601	0.0764659	0.650029	0.0793869	0.595538	0.0769994	0.64652	0.079992	0.57583	0.0786395	0.576128	0.0793884	0.684471	0.0805003	0.583212	0.080033	0.674529	0.0822503	0.604396	0.0804104
		0.699459	0.0873061	0.721791	0.0893554			0.439705	0.0603791	0.472015	0.0632242	0.511581	0.0674042	0.527176	0.0684687	0.597943	0.0744048	0.452483	0.0704336	0.606586	0.0756279	0.503758	0.071939	0.530654	0.0719328	0.565523	0.0709869	0.540841	0.07578	0.608805	0.0757053	0.673858	0.0819544	0.597788	0.0762022	0.67026	0.0825441	0.578477	0.0773342	0.578925	0.0779681	0.709627	0.0829588	0.586033	0.0786103	0.698821	0.084937	0.606943	0.0792492
		0.722354	0.087753	0.781268	0.0951981			0.445411	0.0597454	0.476877	0.0629711	0.518022	0.0667864	0.533106	0.0680046	0.620441	0.0769703	0.459572	0.0693828	0.628765	0.0782501	0.511515	0.0708613	0.537491	0.0711191	0.571267	0.0708491	0.549733	0.0745663	0.615133	0.0753926	0.698666	0.0848581	0.604237	0.0758714	0.694975	0.0854487	0.586084	0.0764598	0.58699	0.076956	0.735814	0.0858057	0.594159	0.0776067	0.724115	0.0879377	0.614247	0.0785435
		0.707451	0.0882009	0.842799	0.101072			0.454582	0.0594899	0.484687	0.0630999	0.528376	0.0666031	0.542636	0.0679621	0.641998	0.0796981	0.470972	0.0687518	0.650018	0.080988	0.524007	0.07018	0.548487	0.0707254	0.580506	0.0711527	0.564063	0.0737707	0.625307	0.0755415	0.722443	0.0878628	0.614602	0.0760215	0.71866	0.0884707	0.598318	0.0760546	0.599971	0.0763962	0.760911	0.0888103	0.607238	0.0770661	0.748362	0.0910095	0.62599	0.0783242
		0.711186	0.0888143	0.906456	0.106978			0.466817	0.0596237	0.495104	0.063605	0.542189	0.0668625	0.55535	0.068343	0.660867	0.082367	0.486185	0.0685682	0.668626	0.0836199	0.540689	0.069925	0.56316	0.0707691	0.592836	0.0718843	0.583204	0.0734278	0.638882	0.0761455	0.743264	0.090725	0.628432	0.076646	0.739398	0.0913651	0.614645	0.0761363	0.6173	0.0763132	0.782884	0.0917293	0.624695	0.0770121	0.769597	0.0939035	0.641656	0.0786009
		0.715785	0.0896724	0.972312	0.112915			0.48158	0.060141	0.507673	0.0644642	0.558858	0.067553	0.570691	0.0691307	0.675519	0.0847608	0.504545	0.0688399	0.683079	0.0859324	0.560832	0.0701072	0.580871	0.0712481	0.607717	0.0730121	0.60632	0.0735527	0.655265	0.0771783	0.759441	0.0932129	0.64512	0.0777175	0.755509	0.0938975	0.63435	0.0767014	0.638219	0.0767107	0.799953	0.0943262	0.64577	0.0774472	0.7861	0.0963852	0.660563	0.0793615
		0.734713	0.0900522	1.04044	0.118884			0.498227	0.0610192	0.521843	0.0656402	0.577654	0.0686447	0.58799	0.0702907	0.684768	0.0866857	0.525251	0.0695551	0.692208	0.0877382	0.583554	0.0707189	0.600844	0.0721415	0.624498	0.0744867	0.632401	0.0741399	0.673741	0.0785947	0.769665	0.0951249	0.663938	0.0791893	0.765686	0.0958627	0.656573	0.077725	0.661815	0.0775712	0.810736	0.0963905	0.669541	0.0783522	0.796533	0.0982535	0.681883	0.0805727
		0.749667	0.0916655	1.11093	0.124885			0.516031	0.0622198	0.536996	0.0670814	0.597756	0.0700897	0.60649	0.0717724	0.687863	0.0879856	0.547397	0.0706826	0.695272	0.0888912	0.607863	0.0717332	0.622207	0.0734103	0.642448	0.0762437	0.660306	0.0751638	0.693502	0.0803327	0.773105	0.0963061	0.684064	0.080997	0.769106	0.0971016	0.680342	0.0791626	0.687057	0.0788572	0.814359	0.0977551	0.694968	0.0796877	0.800053	0.0993571	0.704684	0.0821816
		0.72869	0.0916662	1.18385	0.130918			0.534212	0.0636905	0.552469	0.0687249	0.618285	0.0718249	0.625383	0.0735109			0.570015	0.072173			0.632697	0.0731058	0.644025	0.0749991	0.660781	0.0782063	0.688816	0.0765796	0.713683	0.0823165			0.704618	0.0830615			0.704619	0.0809513	0.71284	0.0805125			0.720941	0.0813953			0.727971	0.0841179
		0.761387	0.0919774	1.25928	0.136984			0.551977	0.0653669	0.567587	0.0704988	0.638345	0.0737745	0.643843	0.0754304			0.592117	0.0739612			0.65697	0.0747768	0.665346	0.0768383	0.678696	0.0802887	0.716686	0.0783254	0.733404	0.0844593			0.724701	0.0852927			0.728342	0.0830128	0.738038	0.0824647			0.746324	0.0834002			0.750725	0.0862969
		0.733325	0.0921488	1.33733	0.143082			0.568549	0.0671758	0.581688	0.0723256	0.657058	0.0758532	0.661062	0.0774469			0.612738	0.0759692			0.679621	0.076673	0.685238	0.0788477	0.695409	0.0824	0.742696	0.0803249	0.751802	0.0866675			0.743436	0.0875931			0.750475	0.0852571	0.761551	0.0846284			0.770009	0.085615			0.771952	0.0886235
		0.762487	0.0932677	1.41807	0.149213			0.583204	0.0690381	0.594156	0.0741255	0.673606	0.0779703	0.67629	0.0794722			0.630975	0.078109			0.699661	0.0787117	0.702831	0.0809394	0.710192	0.0844478	0.765711	0.0824908	0.768073	0.0888445			0.760004	0.0898621			0.77005	0.0875862	0.782349	0.0869092			0.790959	0.0879429			0.790725	0.0909959
		0.770139	0.0937028	1.50159	0.155377			0.595301	0.0708724	0.604447	0.0758198	0.687267	0.0800331	0.68886	0.081418			0.646032	0.0802872			0.716213	0.0808037	0.717356	0.0830219	0.722397	0.0863426	0.784724	0.0847283	0.781506	0.0908953			0.773681	0.0920006			0.786212	0.0898981	0.799525	0.0892074			0.80826	0.0902819			0.806222	0.0933105
		0.777902	0.0957478	1.58801	0.161574			0.604312	0.0725986	0.61211	0.0773344	0.697443	0.0819516	0.698222	0.0831991			0.65725	0.0824086			0.728555	0.0828576	0.728179	0.0850043	0.73149	0.0880016	0.798905	0.0869397	0.791514	0.0927301			0.78387	0.093915			0.798255	0.0920919	0.812328	0.0914224			0.821154	0.0925301			0.817766	0.0954661
		0.818964	0.0976427	1.67741	0.167804			0.609842	0.0741412	0.61681	0.0786033	0.703689	0.0836418	0.703968	0.0847376			0.66414	0.0843805			0.736146	0.0847836	0.734827	0.0868	0.737076	0.0893524	0.807633	0.0890284	0.79766	0.0942689			0.790124	0.0955218			0.805651	0.0940718	0.820197	0.0934576			0.82908	0.094589			0.824854	0.0973684
		0.819486	0.0990448	1.76989	0.174067			0.61165	0.0754328	0.618343	0.0795708	0.705733	0.08503	0.705847	0.0859665			0.6664	0.0861167			0.738655	0.0864976	0.737008	0.0883303	0.738909	0.0903359	0.810527	0.090903	0.799674	0.0954442			0.79217	0.0967506			0.808079	0.0957511	0.82279	0.0952239			0.831689	0.0963687			0.827175	0.0989345
		0.858501	0.100239	1.8	0.176049
		0.829685	0.10056	IsoLine	IsoLine
		0.852911	0.10059
		0.821626	0.100865
		0.875506	0.102171
		0.849227	0.102513
		0.880839	0.103253
		0.902896	0.104225
		0.857679	0.104552
		0.879595	0.106158
		0.904032	0.108026
		0.954171	0.108073
		0.914266	0.108638
		0.925747	0.111223
		0.951947	0.111704
		0.963249	0.114535
		1.12223	0.127812
		1.17626	0.131451
		1.25863	0.133158
		1.93117	0.183949
		1.9875	0.182575
		2.35345	0.215836
		2.33775	0.211444
		2.29094	0.204935
		2.49089	0.22227
		2.61807	0.217598
		3.16108	0.259729
		2.89681	0.231913
		3.27091	0.252465
		3.7743	0.289458
		4.57223	0.304681
		5.32292	0.346401
		4.75961	0.304947
		5.19783	0.3265
		6.34494	0.382854
		5.47736	0.329173
		6.35845	0.378896
		5.90242	0.35109
		5.47269	0.323484
		6.69926	0.394822
		6.94923	0.40879
		6.7128	0.391832
		5.70158	0.331895
		6.68742	0.388911
		5.83902	0.337729
		6.80159	0.393094
		6.65514	0.3829
		6.7354	0.385642
		7.10789	0.404621
		6.4306	0.365602
		7.19682	0.406384
		6.42018	0.362027
		6.77921	0.381817
		6.89258	0.386379
		7.18547	0.402735
		6.74778	0.373026
		6.74182	0.37209
		7.75636	0.426886
		7.24327	0.395384
		7.59306	0.414084
		7.24051	0.390212
		8.10205	0.423402
		10.042	0.471664
		11.676	0.521621
		10.9138	0.46341
		12.4462	0.526229
		12.8744	0.538796
		12.0187	0.470482
		13.212	0.513015
		13.8261	0.535393
		IsoLine	IsoLine
[truncated: 160 more columns]

## Sheet: PlotDat0
Source sheet	all data	0.524681	0.068398	0.426375	0.0574338	0.454796	0.0607196	0.483784	0.0640155	0.513349	0.0673218	0.543504	0.0706383	0.574259	0.0739651	0.605627	0.0773023	0.637621	0.0806498	0.42	0.0567862	0.42	0.0566852	0.42	0.0568872	0.397729	0.0541582	0.61165	0.0754328	0.618343	0.0795708	0.601743	0.0767604
Plot name	Concordia0	0.544328	0.0717094	0.42634	0.0574556	0.454759	0.0607426	0.483744	0.0640399	0.513307	0.0673474	0.543459	0.0706652	0.574211	0.0739934	0.605576	0.0773318	0.637566	0.0806807	0.42	0.0567862	0.42	0.0566852	0.42	0.0568872	0.425533	0.0574338	0.610742	0.076126	0.617566	0.0800269	0.601026	0.0772358
Plot Type	1	IsoLine	IsoLine	0.426241	0.0574756	0.454652	0.0607638	0.48363	0.0640623	0.513184	0.067371	0.543327	0.07069	0.574071	0.0740194	0.605427	0.077359	0.637408	0.0807091	0.427071	0.0576133	0.427071	0.0575108	0.427071	0.0577158	0.45389	0.0607196	0.608159	0.0766688	0.615364	0.0803212	0.598994	0.0775719
1st free col	35			0.426084	0.0574922	0.454483	0.0607814	0.483448	0.0640809	0.51299	0.0673906	0.54312	0.0707106	0.57385	0.0740409	0.605192	0.0773816	0.637158	0.0807327	0.434176	0.058441	0.434176	0.058337	0.434176	0.0585451	0.482812	0.0640155	0.603951	0.0770506	0.611779	0.0804478	0.595687	0.0777623
Sigma Level	2			0.425883	0.0575041	0.454267	0.060794	0.483215	0.0640942	0.512741	0.0674046	0.542853	0.0707253	0.573566	0.0740564	0.604889	0.0773978	0.636837	0.0807496	0.441317	0.0592694	0.441317	0.0591639	0.441317	0.059375	0.512308	0.0673218	0.598201	0.077264	0.606881	0.0804044	0.59117	0.0778031
Absolute Errs	FALSE			0.425653	0.0575103	0.454019	0.0608006	0.48295	0.0641011	0.512456	0.0674119	0.54255	0.070733	0.573242	0.0740644	0.604545	0.0774062	0.63647	0.0807584	0.448494	0.0600984	0.448494	0.0599914	0.448494	0.0602055	0.542391	0.0706383	0.591019	0.0773048	0.600766	0.0801917	0.585531	0.0776937
Symbol Type	1			0.425414	0.0575103	0.453762	0.0608006	0.482673	0.0641011	0.51216	0.0674119	0.542233	0.070733	0.572904	0.0740644	0.604185	0.0774062	0.636089	0.0807584	0.455706	0.0609281	0.455706	0.0608195	0.455706	0.0610367	0.573073	0.0739651	0.582546	0.0771723	0.593552	0.0798139	0.578878	0.077436
Inverse Plot	FALSE			0.425184	0.0575041	0.453514	0.060794	0.482408	0.0640942	0.511876	0.0674046	0.541929	0.0707253	0.57258	0.0740564	0.603841	0.0773978	0.635722	0.0807496	0.462955	0.0617585	0.462955	0.0616483	0.462955	0.0618686	0.604365	0.0773023	0.572947	0.076869	0.58538	0.0792784	0.571342	0.0770353
Color Plot	TRUE			0.424982	0.0574922	0.453297	0.0607814	0.482175	0.0640809	0.511626	0.0673906	0.541663	0.0707106	0.572296	0.0740409	0.603538	0.0773816	0.635401	0.0807327	0.470239	0.0625894	0.470239	0.0624778	0.470239	0.0627011	0.636279	0.0806498	0.562408	0.0764008	0.576409	0.0785956	0.563069	0.0764991
3D plot	FALSE			0.424826	0.0574756	0.453129	0.0607638	0.481994	0.0640623	0.511432	0.067371	0.541455	0.07069	0.572075	0.0740194	0.603303	0.077359	0.635151	0.0807091	0.47756	0.0634211	0.47756	0.0633079	0.47756	0.0635342	IsoLine	IsoLine	0.551135	0.0757768	0.566813	0.0777787	0.554221	0.0758381
Linear	FALSE			0.424726	0.0574556	0.453021	0.0607426	0.481879	0.0640399	0.511309	0.0673474	0.541324	0.0706652	0.571935	0.0739934	0.603154	0.0773318	0.634993	0.0806807	0.484917	0.0642533	0.484917	0.0641387	0.484917	0.064368			0.539347	0.0750093	0.55678	0.0768437	0.544969	0.0750649
Data Range	AC3:AG4			0.424692	0.0574338	0.452985	0.0607196	0.481839	0.0640155	0.511267	0.0673218	0.541279	0.0706383	0.571887	0.0739651	0.603103	0.0773023	0.634938	0.0806498	0.492311	0.0650863	0.492311	0.0649701	0.492311	0.0652025			0.527274	0.074113	0.546505	0.0758088	0.535493	0.0741948
Filled Symbols	FALSE			0.424726	0.057412	0.453021	0.0606965	0.481879	0.0639912	0.511309	0.0672961	0.541324	0.0706113	0.571935	0.0739368	0.603154	0.0772727	0.634993	0.0806188	0.499741	0.0659199	0.499741	0.0658021	0.499741	0.0660376			0.51515	0.0731055	0.536187	0.074694	0.525979	0.0732446
ConcAge	TRUE			0.424826	0.057392	0.453129	0.0606753	0.481994	0.0639688	0.511432	0.0672725	0.541455	0.0705865	0.572075	0.0739108	0.603303	0.0772455	0.635151	0.0805904	0.507209	0.0667541	0.507209	0.0666348	0.507209	0.0668734			0.503212	0.0720064	0.526028	0.0735212	0.516611	0.0722329
ConcSwap	FALSE			0.424982	0.0573753	0.453297	0.0606577	0.482175	0.0639502	0.511626	0.067253	0.541663	0.070566	0.572296	0.0738893	0.603538	0.0772229	0.635401	0.0805668	0.514713	0.067589	0.514713	0.0674682	0.514713	0.0677098			0.491692	0.0708371	0.516225	0.0723131	0.507571	0.0711792
1st Symbol-row	1			0.425184	0.0573634	0.453514	0.0606451	0.482408	0.0639369	0.511876	0.0672389	0.541929	0.0705512	0.57258	0.0738738	0.603841	0.0772067	0.635722	0.0805499	0.522256	0.0684245	0.522256	0.0683022	0.522256	0.0685469			0.480813	0.0696202	0.506968	0.0710933	0.499036	0.0701042
				0.425414	0.0573572	0.453762	0.0606385	0.482673	0.06393	0.51216	0.0672316	0.542233	0.0705436	0.572904	0.0738658	0.604185	0.0771983	0.636089	0.0805411	0.529835	0.0692607	0.529835	0.0691368	0.529835	0.0693846			0.470789	0.0683796	0.498439	0.0698855	0.491172	0.0690287
				0.425653	0.0573572	0.454019	0.0606385	0.48295	0.06393	0.512456	0.0672316	0.54255	0.0705436	0.573242	0.0738658	0.604545	0.0771983	0.63647	0.0805411	0.537453	0.0700976	0.537453	0.0699721	0.537453	0.070223			0.461814	0.0671394	0.490804	0.0687131	0.484131	0.0679737
				0.425883	0.0573634	0.454267	0.0606451	0.483215	0.0639369	0.512741	0.0672389	0.542853	0.0705512	0.573566	0.0738738	0.604889	0.0772067	0.636837	0.0805499	0.545108	0.0709351	0.545108	0.0708081	0.545108	0.0710621			0.454062	0.0659236	0.48421	0.0675991	0.478051	0.0669597
				0.426084	0.0573753	0.454483	0.0606577	0.483448	0.0639502	0.51299	0.067253	0.54312	0.070566	0.57385	0.0738893	0.605192	0.0772229	0.637158	0.0805668	0.552801	0.0717732	0.552801	0.0716447	0.552801	0.0719018			0.447684	0.064756	0.478786	0.0665651	0.47305	0.0660065
				0.426241	0.057392	0.454652	0.0606753	0.48363	0.0639688	0.513184	0.0672725	0.543327	0.0705865	0.574071	0.0739108	0.605427	0.0772455	0.637408	0.0805904	0.560533	0.0726121	0.560533	0.072482	0.560533	0.0727422			0.442806	0.0636593	0.474637	0.0656312	0.469226	0.0651326
				0.42634	0.057412	0.454759	0.0606965	0.483744	0.0639912	0.513307	0.0672961	0.543459	0.0706113	0.574211	0.0739368	0.605576	0.0772727	0.637566	0.0806188	0.568303	0.0734515	0.568303	0.0733199	0.568303	0.0735832			0.439521	0.0626548	0.471846	0.0648156	0.466652	0.064355
				0.426375	0.0574338	0.454796	0.0607196	0.483784	0.0640155	0.513349	0.0673218	0.543504	0.0706383	0.574259	0.0739651	0.605627	0.0773023	0.637621	0.0806498	0.576112	0.0742917	0.576112	0.0741585	0.576112	0.0744249			0.437893	0.0617622	0.470465	0.0641342	0.465379	0.0636889
				ConcTikEll	ConcTikEll	ConcTikEll	ConcTikEll	ConcTikEll	ConcTikEll	ConcTikEll	ConcTikEll	ConcTikEll	ConcTikEll	ConcTikEll	ConcTikEll	ConcTikEll	ConcTikEll	ConcTikEll	ConcTikEll	0.58396	0.0751325	0.58396	0.0749977	0.58396	0.0752672			0.437955	0.0609986	0.470521	0.0636003	0.465432	0.0631471
																				0.591847	0.0759739	0.591847	0.0758376	0.591847	0.0761103			0.439705	0.0603791	0.472015	0.0632242	0.46681	0.0627404
																				0.599773	0.076816	0.599773	0.0766781	0.599773	0.0769539			0.443109	0.0599157	0.474916	0.0630132	0.469486	0.0624765
																				0.607739	0.0776588	0.607739	0.0775193	0.607739	0.0777983			0.4481	0.0596173	0.479167	0.0629715	0.473407	0.0623606
																				0.615744	0.0785022	0.615744	0.0783612	0.615744	0.0786432			0.454582	0.0594899	0.484687	0.0630999	0.478498	0.062395
																				0.623789	0.0793463	0.623789	0.0792037	0.623789	0.0794889			0.462429	0.0595359	0.491368	0.0633958	0.484659	0.062579
																				0.631875	0.080191	0.631875	0.0800468	0.631875	0.0803352			0.471487	0.0597543	0.49908	0.0638536	0.491771	0.062909
																				0.64	0.0810364	0.64	0.0808907	0.64	0.0811822			0.48158	0.060141	0.507673	0.0644642	0.499694	0.0633786
																				0.64	0.0810364	0.64	0.0808907	0.64	0.0811822			0.492513	0.0606884	0.516978	0.0652159	0.508276	0.0639787
																				IsoLine	IsoLine	ConcBand	ConcBand	ConcBand	ConcBand			0.504071	0.0613859	0.526817	0.066094	0.517348	0.0646975
																												0.516031	0.0622198	0.536996	0.0670814	0.526735	0.0655211
																												0.528159	0.063174	0.547317	0.0681588	0.536253	0.0664335
																												0.540219	0.0642299	0.557581	0.0693054	0.545717	0.0674169
																												0.551977	0.0653669	0.567587	0.0704988	0.554943	0.0684521
																												0.563204	0.0665629	0.57714	0.0717157	0.563752	0.0695191
																												0.573681	0.0677946	0.586054	0.0729325	0.571972	0.0705969
																												0.583204	0.0690381	0.594156	0.0741255	0.579443	0.0716648
																												0.591588	0.0702691	0.601288	0.0752714	0.586019	0.0727018
																												0.59867	0.0714636	0.607312	0.0763481	0.591573	0.0736878
																												0.604312	0.0725986	0.61211	0.0773344	0.595997	0.0746036
																												0.608403	0.0736517	0.615588	0.0782113	0.599203	0.0754313
																												0.610866	0.0746026	0.61768	0.0789616	0.601131	0.076155
																												0.61165	0.0754328	0.618343	0.0795708	0.601743	0.0767604
																																Cyan	Cyan

## Sheet: PlotDat6
Source sheet	all data	0.607533	0.0767298	0.483784	0.0640155	0.543504	0.0706383	0.605627	0.0773023	0.670251	0.0840077	0.737476	0.0907549	0.807407	0.097544	0.45	0.060272	0.45	0.0601646	0.45	0.0603794	0.425533	0.0574338	0.705733	0.08503	0.705847	0.0859665	0.737008	0.0883303	0.810527	0.090903	0.692762	0.0846469
Plot name	Concordia1	0.615476	0.0776503	0.483744	0.0640399	0.543459	0.0706652	0.605576	0.0773318	0.670194	0.08404	0.737412	0.0907898	0.807335	0.0975817	0.45	0.060272	0.45	0.0601646	0.45	0.0603794	0.482812	0.0640155	0.704709	0.085757	0.704903	0.0865864	0.735926	0.0891696	0.809907	0.0916404	0.69186	0.0852022
Plot Type	1	0.632641	0.0807307	0.48363	0.0640623	0.543327	0.07069	0.605427	0.077359	0.670025	0.0840696	0.737223	0.090822	0.807125	0.0976164	0.461724	0.0616177	0.461724	0.0615079	0.461724	0.0617276	0.542391	0.0706383	0.701794	0.0863083	0.702218	0.0870325	0.732833	0.0898446	0.808129	0.0923137	0.689278	0.085606
1st free col	35	0.674151	0.0841308	0.483448	0.0640809	0.54312	0.0707106	0.605192	0.0773816	0.66976	0.0840942	0.736926	0.0908486	0.806794	0.0976451	0.473543	0.0629652	0.473543	0.0628529	0.473543	0.0630775	0.604365	0.0773023	0.697043	0.0866732	0.697845	0.0872959	0.727791	0.0903423	0.805208	0.0929171	0.685086	0.0858473
Sigma Level	2	IsoLine	IsoLine	0.483215	0.0640942	0.542853	0.0707253	0.604889	0.0773978	0.66942	0.0841119	0.736545	0.0908677	0.806369	0.0976657	0.485457	0.0643143	0.485457	0.0641995	0.485457	0.0644291	0.668829	0.0840077	0.690551	0.0868445	0.691869	0.0873716	0.720896	0.0906528	0.801169	0.0934457	0.679398	0.0859195
Absolute Errs	FALSE			0.48295	0.0641011	0.54255	0.070733	0.604545	0.0774062	0.669031	0.084121	0.736109	0.0908777	0.805884	0.0976765	0.497468	0.0656652	0.497468	0.0655479	0.497468	0.0657825	0.735883	0.0907549	0.682443	0.086819	0.684406	0.0872581	0.712283	0.0907703	0.796046	0.0938947	0.67237	0.0858207
Symbol Type	1			0.482673	0.0641011	0.542233	0.070733	0.604185	0.0774062	0.668626	0.084121	0.735656	0.0908777	0.805378	0.0976765	0.509576	0.0670178	0.509576	0.066898	0.509576	0.0671376	0.805631	0.097544	0.672877	0.0865971	0.675601	0.0869575	0.702121	0.0906923	0.789883	0.0942605	0.664194	0.0855535
Inverse Plot	FALSE			0.482408	0.0640942	0.541929	0.0707253	0.603841	0.0773978	0.668238	0.0841119	0.735221	0.0908677	0.804893	0.0976657	0.521781	0.0683721	0.521781	0.0682498	0.521781	0.0684944	IsoLine	IsoLine	0.662039	0.0861831	0.665626	0.0864758	0.690606	0.0904204	0.782733	0.0945398	0.655092	0.0851252
Color Plot	FALSE			0.482175	0.0640809	0.541663	0.0707106	0.603538	0.0773816	0.667897	0.0840942	0.734839	0.0908486	0.804468	0.0976451	0.534086	0.0697281	0.534086	0.0696034	0.534086	0.0698529			0.65014	0.0855852	0.654675	0.0858224	0.677963	0.08996	0.774656	0.0947303	0.645313	0.0845475
3D plot	FALSE			0.481994	0.0640623	0.541455	0.07069	0.603303	0.077359	0.667632	0.0840696	0.734542	0.090822	0.804137	0.0976164	0.54649	0.0710859	0.54649	0.0709586	0.54649	0.0712132			0.637412	0.0848148	0.642961	0.0850099	0.664438	0.0893199	0.765722	0.0948304	0.635124	0.0838362
Linear	FALSE			0.481879	0.0640399	0.541324	0.0706652	0.603154	0.0773318	0.667464	0.08404	0.734354	0.0907898	0.803927	0.0975817	0.558994	0.0724453	0.558994	0.0723155	0.558994	0.0725751			0.624102	0.0838872	0.630712	0.0840541	0.650293	0.0885126	0.756007	0.0948392	0.624802	0.0830107
Data Range	AC5:AG13			0.481839	0.0640155	0.541279	0.0706383	0.603103	0.0773023	0.667406	0.0840077	0.734289	0.0907549	0.803855	0.097544	0.571599	0.0738065	0.571599	0.0736742	0.571599	0.0739389			0.61047	0.0828202	0.618166	0.0829737	0.635806	0.0875538	0.745593	0.0947566	0.614629	0.0820935
Filled Symbols	FALSE			0.481879	0.0639912	0.541324	0.0706113	0.603154	0.0772727	0.667464	0.0839754	0.734354	0.0907199	0.803927	0.0975064	0.584306	0.0751695	0.584306	0.0750346	0.584306	0.0753043			0.59678	0.0816346	0.605568	0.0817896	0.621256	0.0864623	0.73457	0.0945834	0.604882	0.0811095
ConcAge	TRUE			0.481994	0.0639688	0.541455	0.0705865	0.603303	0.0772455	0.667632	0.0839458	0.734542	0.0906878	0.804137	0.0974717	0.597116	0.0765341	0.597116	0.0763967	0.597116	0.0766715			0.5833	0.0803536	0.593163	0.080525	0.606928	0.0852592	0.723031	0.094321	0.595828	0.0800858
ConcSwap	FALSE			0.482175	0.0639502	0.541663	0.070566	0.603538	0.0772229	0.667897	0.0839212	0.734839	0.0906611	0.804468	0.0974429	0.61003	0.0779005	0.61003	0.0777606	0.61003	0.0780404			0.570292	0.0790021	0.581192	0.0792045	0.593101	0.0839679	0.711075	0.0939717	0.587713	0.07905
1st Symbol-row	1			0.482408	0.0639369	0.541929	0.0705512	0.603841	0.0772067	0.668238	0.0839035	0.735221	0.090642	0.804893	0.0974224	0.623048	0.0792686	0.623048	0.0791261	0.623048	0.0794111			0.558008	0.0776063	0.569889	0.0778537	0.580043	0.0826137	0.698805	0.0935384	0.580759	0.0780307
				0.482673	0.06393	0.542233	0.0705436	0.604185	0.0771983	0.668626	0.0838944	0.735656	0.0906321	0.805378	0.0974116	0.636171	0.0806385	0.636171	0.0804934	0.636171	0.0807835			0.546688	0.0761935	0.559472	0.0764989	0.568009	0.0812227	0.686323	0.0930249	0.575155	0.0770554
				0.48295	0.06393	0.54255	0.0705436	0.604545	0.0771983	0.669031	0.0838944	0.736109	0.0906321	0.805884	0.0974116	0.6494	0.0820101	0.6494	0.0818625	0.6494	0.0821576			0.536553	0.0747911	0.550146	0.0751666	0.557233	0.0798222	0.673739	0.0924354	0.571055	0.0761509
				0.483215	0.0639369	0.542853	0.0705512	0.604889	0.0772067	0.66942	0.0839035	0.736545	0.090642	0.806369	0.0974224	0.662736	0.0833834	0.662736	0.0832332	0.662736	0.0835335			0.527799	0.0734264	0.542091	0.0738826	0.547925	0.0784394	0.661157	0.0917751	0.568569	0.0753417
				0.483448	0.0639502	0.54312	0.070566	0.605192	0.0772229	0.66976	0.0839212	0.736926	0.0906611	0.806794	0.0974429	0.67618	0.0847585	0.67618	0.0846058	0.67618	0.0849112			0.520597	0.0721261	0.535465	0.0726719	0.540266	0.0771012	0.648686	0.0910496	0.567767	0.0746501
				0.48363	0.0639688	0.543327	0.0705865	0.605427	0.0772455	0.670025	0.0839458	0.737223	0.0906878	0.807125	0.0974717	0.689733	0.0861353	0.689733	0.08598	0.689733	0.0862906			0.515087	0.0709153	0.530396	0.0715581	0.534404	0.0758337	0.636433	0.0902651	0.568669	0.0740948
				0.483744	0.0639912	0.543459	0.0706113	0.605576	0.0772727	0.670194	0.0839754	0.737412	0.0907199	0.807335	0.0975064	0.703395	0.0875139	0.703395	0.087356	0.703395	0.0876717			0.511377	0.0698177	0.526983	0.0705629	0.530455	0.0746614	0.624502	0.0894282	0.571252	0.073691
				0.483784	0.0640155	0.543504	0.0706383	0.605627	0.0773023	0.670251	0.0840077	0.737476	0.0907549	0.807407	0.097544	0.717168	0.0888942	0.717168	0.0887337	0.717168	0.0890547			0.509538	0.0688547	0.525292	0.0697057	0.528494	0.0736073	0.612994	0.0885462	0.575444	0.0734497
				ConcTikEll	ConcTikEll	ConcTikEll	ConcTikEll	ConcTikEll	ConcTikEll	ConcTikEll	ConcTikEll	ConcTikEll	ConcTikEll	ConcTikEll	ConcTikEll	0.731052	0.0902763	0.731052	0.0901132	0.731052	0.0904393			0.509606	0.0680449	0.525357	0.069003	0.528561	0.0726918	0.602007	0.0876264	0.581131	0.0733775
																0.745049	0.0916601	0.745049	0.0914944	0.745049	0.0918258			0.511581	0.0674042	0.527176	0.0684687	0.530654	0.0719328	0.591637	0.0866769	0.588159	0.0734763
																0.759159	0.0930457	0.759159	0.0928774	0.759159	0.0932139			0.515423	0.066945	0.530713	0.0681131	0.534731	0.071345	0.58197	0.0857056	0.596335	0.0737435
																0.773382	0.094433	0.773382	0.0942621	0.773382	0.0946039			0.521058	0.0666762	0.5359	0.0679431	0.540714	0.07094	0.57309	0.0847209	0.605437	0.0741718
																0.787721	0.0958221	0.787721	0.0956486	0.787721	0.0959956			0.528376	0.0666031	0.542636	0.0679621	0.548487	0.0707254	0.565072	0.0837311	0.615216	0.0747494
																0.802176	0.097213	0.802176	0.0970368	0.802176	0.0973891			0.537235	0.0667271	0.55079	0.0681696	0.557897	0.0707057	0.557984	0.0827448	0.625406	0.0754607
																0.816747	0.0986056	0.816747	0.0984268	0.816747	0.0987844			0.547462	0.0670458	0.560203	0.0685617	0.568762	0.070881	0.551888	0.0817703	0.635728	0.0762862
																0.831436	0.1	0.831436	0.0998186	0.829529	0.1			0.558858	0.067553	0.570691	0.0691307	0.580871	0.0712481	0.546835	0.0808159	0.645901	0.0772035
																0.831436	0.1	0.833364	0.1	ConcBand	ConcBand			0.571201	0.0682389	0.582052	0.0698655	0.593987	0.0717997	0.542868	0.0798898	0.655647	0.0781874
																IsoLine	IsoLine	ConcBand	ConcBand					0.584252	0.0690899	0.594062	0.0707518	0.607856	0.0725252	0.540021	0.0789999	0.664701	0.0792112
																								0.597756	0.0700897	0.60649	0.0717724	0.622207	0.0734103	0.538318	0.0781538	0.672816	0.0802469
																								0.61145	0.0712187	0.619093	0.0729073	0.636761	0.074438	0.537775	0.0773586	0.67977	0.0812663
																								0.625068	0.072455	0.631625	0.0741346	0.651234	0.0755881	0.538394	0.0766213	0.685374	0.0822416
																								0.638345	0.0737745	0.643843	0.0754304	0.665346	0.0768383	0.540173	0.075948	0.689474	0.0831461
																								0.651022	0.0751515	0.655508	0.0767693	0.678822	0.0781643	0.543094	0.0753445	0.69196	0.0839552
																								0.662852	0.0765592	0.666395	0.0781254	0.691398	0.0795403	0.547133	0.074816	0.692762	0.0846469
																								0.673606	0.0779703	0.67629	0.0794722	0.702831	0.0809394	0.552256	0.0743669
																								0.683074	0.0793572	0.685002	0.0807836	0.712898	0.0823344	0.558419	0.0740012
																								0.691071	0.080693	0.69236	0.082034	0.721402	0.0836983	0.565569	0.0737219
																								0.697443	0.0819516	0.698222	0.0831991	0.728179	0.0850043	0.573645	0.0735313
																								0.702064	0.0831086	0.702474	0.0842561	0.733097	0.0862272	0.58258	0.0734312
																								0.704845	0.0841414	0.705032	0.0851846	0.736059	0.0873431	0.592295	0.0734224
																								0.705733	0.08503	0.705847	0.0859665	0.737008	0.0883303	0.602709	0.073505
																								Black	Black	Black	Black	Black	Black	0.613732	0.0736782
																														0.625271	0.0739406
																														0.637226	0.0742899
																														0.649497	0.0747232
																														0.661978	0.0752368
																														0.674563	0.0758262
																														0.687145	0.0764865
																														0.699615	0.077212
																														0.711869	0.0779965
																														0.7238	0.0788334
																														0.735308	0.0797155
																														0.746294	0.0806352
																														0.756665	0.0815847
																														0.766332	0.082556
																														0.775212	0.0835407
																														0.78323	0.0845305
																														0.790317	0.0855168
																														0.796414	0.0864913
																														0.801467	0.0874457
																														0.805434	0.0883718
																														0.808281	0.0892617
																														0.809983	0.0901079
																														0.810527	0.090903
																														Black	Black

## Sheet: PlotDat5
Source sheet	all data	0.524681	0.068398	0.426375	0.0574338	0.454796	0.0607196	0.483784	0.0640155	0.513349	0.0673218	0.543504	0.0706383	0.574259	0.0739651	0.605627	0.0773023	0.637621	0.0806498	0.42	0.0567862	0.42	0.0566852	0.42	0.0568872	0.397729	0.0541582	0.61165	0.0754328	0.618343	0.0795708	0.601743	0.0767604
Plot name	Concordia0	0.544328	0.0717094	0.42634	0.0574556	0.454759	0.0607426	0.483744	0.0640399	0.513307	0.0673474	0.543459	0.0706652	0.574211	0.0739934	0.605576	0.0773318	0.637566	0.0806807	0.42	0.0567862	0.42	0.0566852	0.42	0.0568872	0.425533	0.0574338	0.610742	0.076126	0.617566	0.0800269	0.601026	0.0772358
Plot Type	1	IsoLine	IsoLine	0.426241	0.0574756	0.454652	0.0607638	0.48363	0.0640623	0.513184	0.067371	0.543327	0.07069	0.574071	0.0740194	0.605427	0.077359	0.637408	0.0807091	0.427071	0.0576133	0.427071	0.0575108	0.427071	0.0577158	0.45389	0.0607196	0.608159	0.0766688	0.615364	0.0803212	0.598994	0.0775719
1st free col	35			0.426084	0.0574922	0.454483	0.0607814	0.483448	0.0640809	0.51299	0.0673906	0.54312	0.0707106	0.57385	0.0740409	0.605192	0.0773816	0.637158	0.0807327	0.434176	0.058441	0.434176	0.058337	0.434176	0.0585451	0.482812	0.0640155	0.603951	0.0770506	0.611779	0.0804478	0.595687	0.0777623
Sigma Level	2			0.425883	0.0575041	0.454267	0.060794	0.483215	0.0640942	0.512741	0.0674046	0.542853	0.0707253	0.573566	0.0740564	0.604889	0.0773978	0.636837	0.0807496	0.441317	0.0592694	0.441317	0.0591639	0.441317	0.059375	0.512308	0.0673218	0.598201	0.077264	0.606881	0.0804044	0.59117	0.0778031
Absolute Errs	FALSE			0.425653	0.0575103	0.454019	0.0608006	0.48295	0.0641011	0.512456	0.0674119	0.54255	0.070733	0.573242	0.0740644	0.604545	0.0774062	0.63647	0.0807584	0.448494	0.0600984	0.448494	0.0599914	0.448494	0.0602055	0.542391	0.0706383	0.591019	0.0773048	0.600766	0.0801917	0.585531	0.0776937
Symbol Type	1			0.425414	0.0575103	0.453762	0.0608006	0.482673	0.0641011	0.51216	0.0674119	0.542233	0.070733	0.572904	0.0740644	0.604185	0.0774062	0.636089	0.0807584	0.455706	0.0609281	0.455706	0.0608195	0.455706	0.0610367	0.573073	0.0739651	0.582546	0.0771723	0.593552	0.0798139	0.578878	0.077436
Inverse Plot	FALSE			0.425184	0.0575041	0.453514	0.060794	0.482408	0.0640942	0.511876	0.0674046	0.541929	0.0707253	0.57258	0.0740564	0.603841	0.0773978	0.635722	0.0807496	0.462955	0.0617585	0.462955	0.0616483	0.462955	0.0618686	0.604365	0.0773023	0.572947	0.076869	0.58538	0.0792784	0.571342	0.0770353
Color Plot	FALSE			0.424982	0.0574922	0.453297	0.0607814	0.482175	0.0640809	0.511626	0.0673906	0.541663	0.0707106	0.572296	0.0740409	0.603538	0.0773816	0.635401	0.0807327	0.470239	0.0625894	0.470239	0.0624778	0.470239	0.0627011	0.636279	0.0806498	0.562408	0.0764008	0.576409	0.0785956	0.563069	0.0764991
3D plot	FALSE			0.424826	0.0574756	0.453129	0.0607638	0.481994	0.0640623	0.511432	0.067371	0.541455	0.07069	0.572075	0.0740194	0.603303	0.077359	0.635151	0.0807091	0.47756	0.0634211	0.47756	0.0633079	0.47756	0.0635342	IsoLine	IsoLine	0.551135	0.0757768	0.566813	0.0777787	0.554221	0.0758381
Linear	FALSE			0.424726	0.0574556	0.453021	0.0607426	0.481879	0.0640399	0.511309	0.0673474	0.541324	0.0706652	0.571935	0.0739934	0.603154	0.0773318	0.634993	0.0806807	0.484917	0.0642533	0.484917	0.0641387	0.484917	0.064368			0.539347	0.0750093	0.55678	0.0768437	0.544969	0.0750649
Data Range	AC3:AG4			0.424692	0.0574338	0.452985	0.0607196	0.481839	0.0640155	0.511267	0.0673218	0.541279	0.0706383	0.571887	0.0739651	0.603103	0.0773023	0.634938	0.0806498	0.492311	0.0650863	0.492311	0.0649701	0.492311	0.0652025			0.527274	0.074113	0.546505	0.0758088	0.535493	0.0741948
Filled Symbols	FALSE			0.424726	0.057412	0.453021	0.0606965	0.481879	0.0639912	0.511309	0.0672961	0.541324	0.0706113	0.571935	0.0739368	0.603154	0.0772727	0.634993	0.0806188	0.499741	0.0659199	0.499741	0.0658021	0.499741	0.0660376			0.51515	0.0731055	0.536187	0.074694	0.525979	0.0732446
ConcAge	TRUE			0.424826	0.057392	0.453129	0.0606753	0.481994	0.0639688	0.511432	0.0672725	0.541455	0.0705865	0.572075	0.0739108	0.603303	0.0772455	0.635151	0.0805904	0.507209	0.0667541	0.507209	0.0666348	0.507209	0.0668734			0.503212	0.0720064	0.526028	0.0735212	0.516611	0.0722329
ConcSwap	FALSE			0.424982	0.0573753	0.453297	0.0606577	0.482175	0.0639502	0.511626	0.067253	0.541663	0.070566	0.572296	0.0738893	0.603538	0.0772229	0.635401	0.0805668	0.514713	0.067589	0.514713	0.0674682	0.514713	0.0677098			0.491692	0.0708371	0.516225	0.0723131	0.507571	0.0711792
1st Symbol-row	1			0.425184	0.0573634	0.453514	0.0606451	0.482408	0.0639369	0.511876	0.0672389	0.541929	0.0705512	0.57258	0.0738738	0.603841	0.0772067	0.635722	0.0805499	0.522256	0.0684245	0.522256	0.0683022	0.522256	0.0685469			0.480813	0.0696202	0.506968	0.0710933	0.499036	0.0701042
				0.425414	0.0573572	0.453762	0.0606385	0.482673	0.06393	0.51216	0.0672316	0.542233	0.0705436	0.572904	0.0738658	0.604185	0.0771983	0.636089	0.0805411	0.529835	0.0692607	0.529835	0.0691368	0.529835	0.0693846			0.470789	0.0683796	0.498439	0.0698855	0.491172	0.0690287
				0.425653	0.0573572	0.454019	0.0606385	0.48295	0.06393	0.512456	0.0672316	0.54255	0.0705436	0.573242	0.0738658	0.604545	0.0771983	0.63647	0.0805411	0.537453	0.0700976	0.537453	0.0699721	0.537453	0.070223			0.461814	0.0671394	0.490804	0.0687131	0.484131	0.0679737
				0.425883	0.0573634	0.454267	0.0606451	0.483215	0.0639369	0.512741	0.0672389	0.542853	0.0705512	0.573566	0.0738738	0.604889	0.0772067	0.636837	0.0805499	0.545108	0.0709351	0.545108	0.0708081	0.545108	0.0710621			0.454062	0.0659236	0.48421	0.0675991	0.478051	0.0669597
				0.426084	0.0573753	0.454483	0.0606577	0.483448	0.0639502	0.51299	0.067253	0.54312	0.070566	0.57385	0.0738893	0.605192	0.0772229	0.637158	0.0805668	0.552801	0.0717732	0.552801	0.0716447	0.552801	0.0719018			0.447684	0.064756	0.478786	0.0665651	0.47305	0.0660065
				0.426241	0.057392	0.454652	0.0606753	0.48363	0.0639688	0.513184	0.0672725	0.543327	0.0705865	0.574071	0.0739108	0.605427	0.0772455	0.637408	0.0805904	0.560533	0.0726121	0.560533	0.072482	0.560533	0.0727422			0.442806	0.0636593	0.474637	0.0656312	0.469226	0.0651326
				0.42634	0.057412	0.454759	0.0606965	0.483744	0.0639912	0.513307	0.0672961	0.543459	0.0706113	0.574211	0.0739368	0.605576	0.0772727	0.637566	0.0806188	0.568303	0.0734515	0.568303	0.0733199	0.568303	0.0735832			0.439521	0.0626548	0.471846	0.0648156	0.466652	0.064355
				0.426375	0.0574338	0.454796	0.0607196	0.483784	0.0640155	0.513349	0.0673218	0.543504	0.0706383	0.574259	0.0739651	0.605627	0.0773023	0.637621	0.0806498	0.576112	0.0742917	0.576112	0.0741585	0.576112	0.0744249			0.437893	0.0617622	0.470465	0.0641342	0.465379	0.0636889
				ConcTikEll	ConcTikEll	ConcTikEll	ConcTikEll	ConcTikEll	ConcTikEll	ConcTikEll	ConcTikEll	ConcTikEll	ConcTikEll	ConcTikEll	ConcTikEll	ConcTikEll	ConcTikEll	ConcTikEll	ConcTikEll	0.58396	0.0751325	0.58396	0.0749977	0.58396	0.0752672			0.437955	0.0609986	0.470521	0.0636003	0.465432	0.0631471
																				0.591847	0.0759739	0.591847	0.0758376	0.591847	0.0761103			0.439705	0.0603791	0.472015	0.0632242	0.46681	0.0627404
																				0.599773	0.076816	0.599773	0.0766781	0.599773	0.0769539			0.443109	0.0599157	0.474916	0.0630132	0.469486	0.0624765
																				0.607739	0.0776588	0.607739	0.0775193	0.607739	0.0777983			0.4481	0.0596173	0.479167	0.0629715	0.473407	0.0623606
																				0.615744	0.0785022	0.615744	0.0783612	0.615744	0.0786432			0.454582	0.0594899	0.484687	0.0630999	0.478498	0.062395
																				0.623789	0.0793463	0.623789	0.0792037	0.623789	0.0794889			0.462429	0.0595359	0.491368	0.0633958	0.484659	0.062579
																				0.631875	0.080191	0.631875	0.0800468	0.631875	0.0803352			0.471487	0.0597543	0.49908	0.0638536	0.491771	0.062909
																				0.64	0.0810364	0.64	0.0808907	0.64	0.0811822			0.48158	0.060141	0.507673	0.0644642	0.499694	0.0633786
																				0.64	0.0810364	0.64	0.0808907	0.64	0.0811822			0.492513	0.0606884	0.516978	0.0652159	0.508276	0.0639787
																				IsoLine	IsoLine	ConcBand	ConcBand	ConcBand	ConcBand			0.504071	0.0613859	0.526817	0.066094	0.517348	0.0646975
																												0.516031	0.0622198	0.536996	0.0670814	0.526735	0.0655211
																												0.528159	0.063174	0.547317	0.0681588	0.536253	0.0664335
																												0.540219	0.0642299	0.557581	0.0693054	0.545717	0.0674169
																												0.551977	0.0653669	0.567587	0.0704988	0.554943	0.0684521
																												0.563204	0.0665629	0.57714	0.0717157	0.563752	0.0695191
																												0.573681	0.0677946	0.586054	0.0729325	0.571972	0.0705969
																												0.583204	0.0690381	0.594156	0.0741255	0.579443	0.0716648
																												0.591588	0.0702691	0.601288	0.0752714	0.586019	0.0727018
																												0.59867	0.0714636	0.607312	0.0763481	0.591573	0.0736878
																												0.604312	0.0725986	0.61211	0.0773344	0.595997	0.0746036
																												0.608403	0.0736517	0.615588	0.0782113	0.599203	0.0754313
																												0.610866	0.0746026	0.61768	0.0789616	0.601131	0.076155
																												0.61165	0.0754328	0.618343	0.0795708	0.601743	0.0767604
																												Black	Black	Black	Black

## Sheet: PlotDat4
Source sheet	all data	0.524681	0.068398	0	0	0.217708	0.0315113	0.61165	0.0754328	0.618343	0.0795708	0.705733	0.08503	0.705847	0.0859665	0.687863	0.0879856	0.695272	0.0888912	0.738655	0.0864976	0.737008	0.0883303	0.738909	0.0903359	0.810527	0.090903	0.799674	0.0954442	0.773105	0.0963061	0.79217	0.0967506	0.769106	0.0971016	0.808079	0.0957511	0.82279	0.0952239	0.814359	0.0977551	0.831689	0.0963687	0.800053	0.0993571	0.827175	0.0989345	0.835658	0.101089
Plot name	Concordia2	0.544328	0.0717094	0.0862007	0.0131092	0.482812	0.0640155	0.608003	0.0766897	0.615231	0.0803306	0.701617	0.086329	0.702055	0.0870485	0.684554	0.0885553	0.692023	0.0892977	0.733725	0.0883597	0.732646	0.0898712	0.735244	0.0910103	0.804887	0.0929684	0.795635	0.0963716	0.769485	0.0966609	0.78805	0.0977233	0.765492	0.0975137	0.803226	0.0974267	0.817656	0.0970622	0.810527	0.0983093	0.826514	0.0982077	0.796373	0.0996066	0.822509	0.100407	0.831452	0.101716
Plot Type	1	0.607533	0.0767298	0.179832	0.0263902	0.805631	0.097544	0.597605	0.0772749	0.606374	0.080392	0.689879	0.0868504	0.69125	0.0873691	0.67511	0.0883486	0.682725	0.088925	0.719571	0.0895391	0.720182	0.0906716	0.724771	0.0908695	0.788655	0.0943177	0.784102	0.0964551	0.759096	0.0961604	0.776298	0.0978171	0.755136	0.0970657	0.789359	0.0982734	0.802946	0.0981101	0.799553	0.0980084	0.811693	0.0992359	0.785792	0.0989817	0.809197	0.10101	0.819408	0.101399
1st free col	173	0.615476	0.0776503	0.281534	0.0398453	1.19873	0.132129	0.581299	0.0771409	0.592491	0.07975	0.671469	0.0865518	0.674306	0.0869023	0.660295	0.0873823	0.668131	0.0878032	0.69734	0.0899402	0.700626	0.0906666	0.70834	0.0899249	0.763147	0.0948419	0.76601	0.0956879	0.742782	0.0948452	0.757868	0.0970245	0.738878	0.0957938	0.7676	0.0982226	0.779852	0.0982827	0.782324	0.0968766	0.788427	0.0993702	0.769166	0.0975332	0.788318	0.100694	0.800503	0.100163
Sigma Level	2	0.608817	0.0789719	0.392003	0.0534768	1.67741	0.167804	0.560407	0.0762986	0.574705	0.0784566	0.64788	0.0854575	0.652596	0.0856861	0.64131	0.0857346	0.649423	0.0860232	0.668832	0.0895304	0.675562	0.0898566	0.68728	0.0882531	0.730429	0.0944982	0.742824	0.0941323	0.721863	0.092822	0.734251	0.0954096	0.718034	0.0938011	0.739713	0.0972785	0.750245	0.097566	0.760237	0.0950057	0.758601	0.0985996	0.747844	0.0953783	0.761562	0.099486	0.776267	0.098107
Absolute Errs	FALSE	0.617351	0.0796785	0.511995	0.067287	2.2603	0.204603	0.53662	0.0748163	0.554459	0.0766166	0.621023	0.0836562	0.627878	0.0838188	0.619692	0.083539	0.628117	0.0837291	0.636357	0.088343	0.647021	0.0883074	0.663299	0.0859894	0.693151	0.0933147	0.716423	0.0919141	0.698034	0.0902545	0.707362	0.0931033	0.694293	0.0912491	0.707957	0.0955175	0.716524	0.0960182	0.735081	0.0925472	0.724631	0.0969865	0.723551	0.0926916	0.731098	0.0974824	0.748666	0.0953989
Symbol Type	1	0.619865	0.0799318	0.64233	0.0812782	2.97009	0.242562	0.511866	0.072814	0.533392	0.074379	0.593072	0.0812937	0.602156	0.0814517	0.597194	0.0809734	0.605938	0.0811069	0.602546	0.0864742	0.617315	0.0861443	0.638339	0.0833173	0.654334	0.0913871	0.688946	0.0892132	0.673226	0.0873507	0.679378	0.0902924	0.669579	0.0883444	0.674905	0.0930823	0.68142	0.0937646	0.708894	0.0897003	0.689269	0.0946617	0.698257	0.0896909	0.699393	0.0948462	0.719934	0.0922576
Inverse Plot	FALSE	0.632641	0.0807307	0.7839	0.0954529	3.83441	0.281716	0.48815	0.0704539	0.513211	0.0719252	0.566293	0.0785615	0.577512	0.0787767	0.575637	0.0782457	0.584685	0.078369	0.570138	0.0840754	0.58885	0.0835426	0.614422	0.0804533	0.617123	0.0888717	0.662618	0.0862484	0.649448	0.0843461	0.652567	0.0872047	0.645893	0.0853225	0.643233	0.0901701	0.647778	0.0909877	0.683797	0.0866957	0.65538	0.0918135	0.67401	0.0866191	0.669016	0.0917908	0.692399	0.0889377
Color Plot	FALSE	0.651216	0.080948	0.937674	0.109813	4.8869	0.322105	0.467394	0.0679273	0.495551	0.0694538	0.542855	0.0756809	0.555945	0.0760105	0.556768	0.0755768	0.566077	0.0757372	0.541759	0.0813408	0.563934	0.0807131	0.593486	0.0776294	0.584532	0.0859722	0.639573	0.0832598	0.628628	0.0814838	0.629101	0.0840902	0.625155	0.0824281	0.615509	0.087017	0.618322	0.0879126	0.661824	0.0837767	0.625709	0.0886726	0.652775	0.0837251	0.642428	0.0885638	0.668292	0.085708
3D plot	FALSE	0.674151	0.0841308	1.1047	0.124362	6.16853	0.363766	0.451279	0.0654388	0.481843	0.0671653	0.524657	0.0728852	0.5392	0.073377	0.542116	0.073183	0.551624	0.0734247	0.519707	0.0784922	0.544583	0.0778851	0.577227	0.0750743	0.559201	0.0829235	0.621678	0.0804895	0.61245	0.0789959	0.610881	0.0812014	0.609045	0.0798957	0.593978	0.0838783	0.59544	0.0847884	0.644755	0.0811798	0.602661	0.0854935	0.636273	0.0812434	0.621783	0.0854266	0.649566	0.0828303
Linear	FALSE	0.703137	0.0859551	1.28613	0.139102	7.72917	0.40674	0.44111	0.0631901	0.473196	0.0652448	0.513173	0.070401	0.528634	0.0710898	0.532867	0.0712581	0.542495	0.0716188	0.505769	0.0757601	0.532366	0.0752876	0.566962	0.0729951	0.543183	0.0799726	0.610382	0.078162	0.602227	0.0770839	0.599383	0.0787721	0.598867	0.0779304	0.580385	0.0810083	0.580985	0.0818681	0.633972	0.0791155	0.588102	0.0825337	0.625839	0.0793751	0.608754	0.0826334	0.637738	0.0805377
Data Range	AC3:AG84	0.685946	0.0861044	1.4832	0.154034	9.62957	0.451068	0.437712	0.0613632	0.470313	0.0638481	0.509333	0.0684296	0.525104	0.0693341	0.529772	0.0699582	0.539431	0.0704659	0.501075	0.073366	0.528273	0.073131	0.563523	0.0715601	0.537775	0.0773586	0.606601	0.0764659	0.598787	0.0759027	0.595538	0.0769994	0.595447	0.0766916	0.57583	0.0786395	0.576128	0.0793884	0.63035	0.0777509	0.583212	0.080033	0.622319	0.0782715	0.604396	0.0804104	0.633767	0.0790158
Filled Symbols	FALSE	0.693854	0.086875	1.69725	0.169163	IsoLine	IsoLine	0.44136	0.0601063	0.473426	0.0630883	0.513449	0.0671305	0.528896	0.0682521	0.533081	0.0693885	0.54268	0.0700593	0.506005	0.0715039	0.532636	0.0715902	0.567188	0.0708857	0.543415	0.0752933	0.61064	0.0755386	0.602407	0.0755479	0.599658	0.0760267	0.599061	0.0762795	0.580683	0.0769639	0.581262	0.0775501	0.634181	0.0771966	0.588388	0.0781941	0.625999	0.078022	0.609061	0.0789378	0.637973	0.0783881
ConcAge	FALSE	0.682277	0.0868966	1.92975	0.184489			0.451758	0.0595211	0.482282	0.0630269	0.525187	0.0666092	0.539701	0.0679315	0.542525	0.0695951	0.551978	0.0704321	0.520158	0.0703245	0.5451	0.0707898	0.577661	0.0710265	0.559647	0.0739439	0.622173	0.0754551	0.612795	0.0760484	0.61141	0.0759329	0.609417	0.0767275	0.59455	0.0761172	0.595972	0.0765022	0.645155	0.0774976	0.603209	0.0771659	0.636581	0.0786469	0.622373	0.0783349	0.650017	0.0787053
ConcSwap	FALSE	0.691954	0.0871953	2.1823	0.200017			0.468063	0.0596551	0.496166	0.0636689	0.543596	0.0669077	0.556645	0.0683982	0.55734	0.0705615	0.566572	0.0715539	0.54239	0.0699234	0.564656	0.0707948	0.594092	0.0719711	0.585155	0.0734198	0.640265	0.0762223	0.62911	0.0773636	0.629841	0.0767255	0.625676	0.0779994	0.616309	0.0761679	0.619066	0.0763296	0.662384	0.0786294	0.626475	0.0770316	0.653206	0.0800954	0.643253	0.0786504	0.668922	0.0799418
1st Symbol-row	1	0.699459	0.0873061	2.45662	0.215748			0.488956	0.0604974	0.513951	0.0649623	0.567185	0.068002	0.578356	0.0696145	0.576325	0.0722092	0.58528	0.0733339	0.570898	0.0703332	0.58972	0.0716047	0.615152	0.0736429	0.617873	0.0737634	0.663451	0.0777779	0.650029	0.0793869	0.653457	0.0783404	0.64652	0.079992	0.644196	0.0771121	0.648673	0.0770462	0.684471	0.0805003	0.656301	0.0778022	0.674529	0.0822503	0.670008	0.0798589	0.693158	0.0819973
		0.722354	0.087753	2.75458	0.231686			0.512743	0.0619797	0.534197	0.0668023	0.594043	0.0698034	0.603073	0.0714818	0.597943	0.0744048	0.606586	0.0756279	0.603373	0.0715206	0.618261	0.073154	0.639133	0.0759066	0.655151	0.074947	0.689852	0.079996	0.673858	0.0819544	0.680347	0.0806467	0.67026	0.0825441	0.675952	0.0788731	0.682394	0.0785941	0.709627	0.0829588	0.690271	0.0794153	0.698821	0.084937	0.700473	0.0818624	0.720759	0.0847055
		0.707451	0.0882009	3.07823	0.247832			0.537496	0.063982	0.555264	0.0690399	0.621994	0.0721658	0.628795	0.0738488	0.620441	0.0769703	0.628765	0.0782501	0.637184	0.0733894	0.647967	0.0753171	0.664093	0.0785787	0.693967	0.0768745	0.717329	0.0826969	0.698666	0.0848581	0.70833	0.0834576	0.694975	0.0854487	0.709004	0.0813083	0.717498	0.0808477	0.735814	0.0858057	0.725633	0.0817401	0.724115	0.0879377	0.732177	0.0844987	0.749491	0.0878467
		0.711186	0.0888143	3.42977	0.26419			0.561212	0.0663421	0.575445	0.0714937	0.648773	0.0748981	0.653439	0.0765238	0.641998	0.0796981	0.650018	0.080988	0.669592	0.0757882	0.676431	0.0779188	0.688009	0.0814427	0.731179	0.0793899	0.743656	0.0856618	0.722443	0.0878628	0.735141	0.0865453	0.71866	0.0884707	0.740675	0.0842204	0.75114	0.0836245	0.760911	0.0888103	0.759522	0.0845883	0.748362	0.0910095	0.762554	0.0875541	0.777026	0.0911667
		0.715785	0.0896724	3.81162	0.280763			0.581968	0.0688687	0.593105	0.0739651	0.672211	0.0777787	0.675006	0.0792901	0.660867	0.082367	0.668626	0.0836199	0.697971	0.0785228	0.701348	0.0807482	0.708945	0.0842666	0.76377	0.0822894	0.766701	0.0886504	0.743264	0.090725	0.758607	0.0896598	0.739398	0.0913651	0.7684	0.0873736	0.780596	0.0866997	0.782884	0.0917293	0.789192	0.0877292	0.769597	0.0939035	0.789142	0.0907811	0.801133	0.0943963
		0.734713	0.0900522	4.22639	0.297552			0.598084	0.0713572	0.606813	0.0762536	0.690409	0.0805743	0.691751	0.0819235	0.675519	0.0847608	0.683079	0.0859324	0.720023	0.0813714	0.720698	0.0835763	0.725205	0.0868217	0.789101	0.0853381	0.784597	0.0914207	0.759441	0.0932129	0.776828	0.0925486	0.755509	0.0938975	0.789931	0.0905123	0.803478	0.0898239	0.799953	0.0943262	0.812241	0.0909083	0.7861	0.0963852	0.809787	0.0939183	0.819859	0.097274
		0.749667	0.0916655	4.67691	0.314562			0.608252	0.0736059	0.61546	0.0781741	0.701893	0.0830585	0.702317	0.0842107	0.684768	0.0866857	0.692208	0.0877382	0.73396	0.0841035	0.732915	0.0861738	0.73547	0.0889009	0.805119	0.088289	0.795893	0.0937481	0.769665	0.0951249	0.788326	0.0949778	0.765686	0.0958627	0.803524	0.0933823	0.817933	0.0927442	0.810736	0.0963905	0.826799	0.0938681	0.796533	0.0982535	0.822816	0.0967115	0.831687	0.0995667
		0.72869	0.0916662	5.16626	0.331795			0.61165	0.0754328	0.618343	0.0795708	0.705733	0.08503	0.705847	0.0859665	0.687863	0.0879856	0.695272	0.0888912	0.738655	0.0864976	0.737008	0.0883303	0.738909	0.0903359	0.810527	0.090903	0.799674	0.0954442	0.773105	0.0963061	0.79217	0.0967506	0.769106	0.0971016	0.808079	0.0957511	0.82279	0.0952239	0.814359	0.0977551	0.831689	0.0963687	0.800053	0.0993571	0.827175	0.0989345	0.835658	0.101089
		0.761387	0.0919774	5.69779	0.349254			Black	Black	Black	Black	Black	Black	Black	Black	Black	Black	Black	Black	Black	Black	Black	Black	Black	Black	Black	Black	Black	Black	Black	Black	Black	Black	Black	Black	Black	Black	Black	Black	Black	Black	Black	Black	Black	Black	Black	Black	Black	Black
		0.733325	0.0921488	6.27515	0.366941
		0.762487	0.0932677	6.90227	0.384861
		0.770139	0.0937028	7.58345	0.403015
		0.777902	0.0957478	8.32335	0.421407
		0.818964	0.0976427	9.12703	0.440041
		0.819486	0.0990448	9.99999	0.458919
		0.858501	0.100239	10	0.458919
		0.829685	0.10056	IsoLine	IsoLine
		0.852911	0.10059
		0.821626	0.100865
		0.875506	0.102171
		0.849227	0.102513
		0.880839	0.103253
		0.902896	0.104225
		0.857679	0.104552
		0.879595	0.106158
		0.904032	0.108026
		0.954171	0.108073
		0.914266	0.108638
		0.951947	0.111704
		0.963249	0.114535
		1.12223	0.127812
		1.17626	0.131451
		1.25863	0.133158
		1.93117	0.183949
		1.9875	0.182575
		2.35345	0.215836
		2.33775	0.211444
		2.29094	0.204935
		2.49089	0.22227
		2.61807	0.217598
		3.16108	0.259729
		2.89681	0.231913
		3.27091	0.252465
		3.7743	0.289458
		4.57223	0.304681
		5.32292	0.346401
		4.75961	0.304947
		5.19783	0.3265
		6.34494	0.382854
		5.47736	0.329173
		6.35845	0.378896
		5.90242	0.35109
		5.47269	0.323484
		6.69926	0.394822
		6.7128	0.391832
		5.70158	0.331895
		6.68742	0.388911
		5.83902	0.337729
		6.80159	0.393094
		6.65514	0.3829
		6.7354	0.385642
		7.10789	0.404621
		6.4306	0.365602
		7.19682	0.406384
		6.42018	0.362027
		6.77921	0.381817
		6.89258	0.386379
		IsoLine	IsoLine
[truncated: 122 more columns]

## Sheet: PlotDat7
Source sheet	all data	0.524681	0.068398	0.447683	0.06	0.482812	0.0640155	0.61165	0.0754328	0.618343	0.0795708	0.705733	0.08503	0.705847	0.0859665	0.687863	0.0879856	0.695272	0.0888912	0.738655	0.0864976	0.737008	0.0883303	0.738909	0.0903359	0.810527	0.090903	0.799674	0.0954442	0.773105	0.0963061	0.79217	0.0967506	0.769106	0.0971016	0.808079	0.0957511	0.82279	0.0952239	0.814359	0.0977551	0.831689	0.0963687	0.800053	0.0993571	0.827175	0.0989345	0.835658	0.101089
Plot name	Concordia3	0.544328	0.0717094	0.457846	0.0611736	0.557657	0.0723004	0.610391	0.0762376	0.616641	0.0801947	0.704313	0.0858721	0.704538	0.086682	0.686057	0.0884785	0.693501	0.0892653	0.736966	0.0876513	0.735506	0.0893067	0.736909	0.090909	0.808599	0.0921775	0.798282	0.0960812	0.771134	0.09665	0.790749	0.0974179	0.767137	0.0974878	0.806408	0.0968158	0.821027	0.0963772	0.812271	0.0982445	0.829912	0.097525	0.798052	0.099626	0.825566	0.0998877	0.833366	0.101641
Plot Type	1	0.607533	0.0767298	0.482812	0.0640155	0.636279	0.0806498	0.606794	0.0768286	0.611779	0.0804478	0.700253	0.0864649	0.7008	0.0871511	0.680875	0.0885559	0.688402	0.0892204	0.732083	0.0885945	0.731198	0.0900492	0.731164	0.0910469	0.803004	0.0932326	0.794295	0.0964419	0.76544	0.0965329	0.786684	0.0977976	0.76146	0.0974111	0.801615	0.0976181	0.815948	0.0972832	0.806254	0.0982755	0.824793	0.0984269	0.792254	0.0994223	0.820962	0.100562	0.826761	0.101686
1st free col	199	0.615476	0.0776503	0.508205	0.0668651	0.718871	0.0890642	0.600958	0.0771897	0.603969	0.080319	0.693664	0.0867921	0.694734	0.0873611	0.672544	0.0882145	0.680198	0.0887585	0.724139	0.0893014	0.724202	0.0905375	0.721925	0.0907433	0.793894	0.0940393	0.787821	0.0965166	0.756272	0.09596	0.780088	0.0978794	0.752321	0.0968748	0.793831	0.098136	0.807691	0.0979169	0.79657	0.0978465	0.816474	0.0990499	0.782913	0.0987551	0.81349	0.10094	0.816134	0.101223
Sigma Level	2	0.608817	0.0789719	0.534033	0.0697224	0.805631	0.097544	0.59304	0.0773109	0.593552	0.0798139	0.684725	0.0868448	0.686506	0.0873062	0.661428	0.0874691	0.669247	0.0878998	0.71335	0.0897527	0.714708	0.0907583	0.709596	0.0900117	0.781518	0.0945758	0.779037	0.0963031	0.74403	0.0949565	0.771139	0.097661	0.740121	0.0959025	0.783268	0.0983556	0.796482	0.0982612	0.783642	0.0969764	0.805181	0.0993769	0.770438	0.0976534	0.803352	0.10101	0.801948	0.100272
Absolute Errs	FALSE	0.617351	0.0796785	0.560304	0.0725872	0.89677	0.10609	0.583258	0.077189	0.580984	0.0789546	0.673681	0.0866217	0.676341	0.0869879	0.648012	0.0863523	0.656028	0.0866817	0.700012	0.0899361	0.702975	0.0907056	0.694715	0.0888839	0.766213	0.0948274	0.768183	0.0958074	0.729249	0.093566	0.760082	0.0971483	0.725393	0.0945366	0.770214	0.0982707	0.782627	0.0983067	0.768036	0.0957032	0.791223	0.0993991	0.755373	0.0961653	0.790826	0.100771	0.784824	0.0988742
Symbol Type	1	0.619865	0.0799318	0.587024	0.0754598	0.99251	0.114702	0.571878	0.0768273	0.566813	0.0777787	0.660832	0.0861287	0.664516	0.086415	0.632884	0.084913	0.641119	0.0851576	0.684487	0.0898466	0.689324	0.0903807	0.677933	0.0874093	0.748396	0.0947872	0.755555	0.095043	0.712576	0.0918494	0.747218	0.0963555	0.708781	0.0928367	0.755026	0.0978838	0.766503	0.0980522	0.750433	0.0940826	0.774979	0.0991158	0.738376	0.094356	0.776253	0.100229	0.76551	0.0970908
Inverse Plot	FALSE	0.632641	0.0807307	0.614202	0.07834	1.09308	0.123382	0.559211	0.0762357	0.551661	0.0763375	0.64653	0.0853793	0.651353	0.0856029	0.616704	0.083214	0.625171	0.083394	0.6672	0.0894867	0.674127	0.0897927	0.659984	0.0856523	0.728555	0.0944563	0.741497	0.0940307	0.694739	0.0898818	0.732899	0.095304	0.69101	0.0908773	0.738117	0.0972052	0.74855	0.0975045	0.731603	0.0921853	0.756893	0.0985348	0.720192	0.0923045	0.76003	0.0993992	0.744849	0.0949998
Color Plot	FALSE	0.651216	0.080948	0.641846	0.081228	1.19873	0.132129	0.545602	0.0754303	0.536187	0.074694	0.631164	0.084394	0.637211	0.0845739	0.600179	0.0813296	0.608881	0.0814681	0.648621	0.0888662	0.657798	0.0889574	0.641651	0.0836897	0.70723	0.0938438	0.726392	0.092798	0.676518	0.087749	0.717515	0.0940227	0.672858	0.0887438	0.719949	0.0962536	0.729258	0.0966786	0.712369	0.0900943	0.737459	0.0976719	0.701614	0.0901005	0.742601	0.0983041	0.723746	0.0926926
3D plot	FALSE	0.674151	0.0841308	0.669963	0.0841237	1.30971	0.140944	0.531422	0.0744331	0.52107	0.0729201	0.615153	0.0831996	0.622476	0.083356	0.584031	0.0793422	0.592962	0.0794639	0.629258	0.0880019	0.640783	0.0878978	0.623736	0.0816072	0.685002	0.0929663	0.710653	0.0913788	0.658709	0.0855444	0.701485	0.0925463	0.655117	0.0865297	0.701017	0.095055	0.709153	0.0955971	0.693571	0.0879009	0.717206	0.0965507	0.683454	0.0878403	0.72444	0.0969735	0.703122	0.09027
Linear	FALSE	0.703137	0.0859551	0.698561	0.0870271	1.42629	0.149828	0.517058	0.0732712	0.506968	0.0710933	0.598935	0.0818288	0.607551	0.0819826	0.568967	0.0773386	0.578108	0.0774691	0.609639	0.0869175	0.623546	0.0866426	0.607022	0.079496	0.662478	0.0918478	0.694709	0.0898116	0.64209	0.0833643	0.685248	0.0909153	0.638564	0.0843315	0.681838	0.0936419	0.688784	0.0942894	0.676031	0.0857011	0.696687	0.0952017	0.666506	0.0856226	0.706043	0.0954438	0.683878	0.0878378
Data Range	AC3:AG84	0.685946	0.0861044	0.727649	0.0899383	IsoLine	IsoLine	0.502903	0.0719764	0.4945	0.0692934	0.582951	0.0803188	0.592841	0.0804909	0.555645	0.0754064	0.564969	0.0755709	0.590299	0.0856426	0.606557	0.0852262	0.59224	0.0774482	0.640273	0.0905188	0.678995	0.0881391	0.627388	0.0813039	0.669245	0.089174	0.62392	0.0822455	0.662935	0.092053	0.668706	0.0927912	0.660516	0.083591	0.676461	0.0936617	0.651511	0.0835444	0.687912	0.0937567	0.666857	0.0855025
Filled Symbols	FALSE	0.693854	0.086875	0.757235	0.0928574			0.489341	0.0705841	0.48421	0.0675991	0.567637	0.078711	0.578749	0.0789217	0.544646	0.07363	0.55412	0.0738522	0.571765	0.0842118	0.590279	0.0836872	0.580035	0.0755534	0.618992	0.0890156	0.66394	0.0864072	0.615245	0.0794533	0.653913	0.0873701	0.611828	0.0803628	0.644823	0.0903316	0.649467	0.0911434	0.647704	0.0816628	0.657081	0.0919728	0.639124	0.0816965	0.670541	0.0919582	0.652801	0.0833659
ConcAge	FALSE	0.682277	0.0868966	0.787328	0.0957842			0.476743	0.069132	0.476546	0.0660845	0.553412	0.0770491	0.565659	0.0773179	0.536452	0.072087	0.546035	0.0723881	0.554544	0.0826644	0.575157	0.0820675	0.570941	0.0738944	0.599215	0.0873791	0.649954	0.0846628	0.606192	0.0778934	0.639671	0.0855526	0.602814	0.0787656	0.627998	0.0885246	0.631591	0.089391	0.638154	0.0800007	0.639075	0.090181	0.629886	0.0801597	0.654404	0.0900973	0.642324	0.0815217
ConcSwap	FALSE	0.691954	0.0871953	0.817937	0.0987189			0.465453	0.06766	0.471846	0.0648156	0.540663	0.0753785	0.553928	0.0757231	0.531421	0.070845	0.541066	0.0712427	0.539104	0.0810424	0.561603	0.0804113	0.565356	0.0725436	0.581482	0.085654	0.637418	0.0829538	0.600625	0.0766924	0.626906	0.0837712	0.597273	0.0775238	0.612916	0.0866814	0.615567	0.0875816	0.632283	0.0786775	0.622934	0.0883352	0.624202	0.0790012	0.639942	0.0882248	0.635886	0.0800502
1st Symbol-row	1	0.699459	0.0873061	0.849069	0.101661			0.455779	0.0662081	0.470313	0.0638481	0.529738	0.0737448	0.543875	0.074181	0.529772	0.0699582	0.539431	0.0704659	0.525867	0.0793901	0.549987	0.0787639	0.563523	0.0715601	0.566278	0.0838874	0.626675	0.0813266	0.598787	0.0759027	0.615968	0.0820745	0.595447	0.0766916	0.599991	0.0848522	0.601831	0.0857648	0.63035	0.0777509	0.609098	0.0864857	0.622319	0.0782715	0.627548	0.0863918	0.633767	0.0790158
		0.722354	0.087753	0.880735	0.104612			0.447984	0.0648159	0.472015	0.0632242	0.520935	0.0721925	0.535776	0.0727334	0.531578	0.0694653	0.541202	0.0700918	0.515194	0.0777525	0.540625	0.0771701	0.565523	0.0709869	0.554015	0.0821274	0.618018	0.0798256	0.600758	0.0755589	0.607155	0.0805087	0.597416	0.0763054	0.589574	0.0830869	0.590758	0.08399	0.632437	0.0772614	0.597945	0.084683	0.624321	0.0780026	0.617561	0.0846483	0.636059	0.0784638
		0.707451	0.0882009	0.912942	0.10757			0.442281	0.0635214	0.476877	0.0629711	0.514494	0.0707639	0.52985	0.0714199	0.53676	0.0693878	0.546301	0.0701367	0.507376	0.0761745	0.533773	0.0756735	0.571267	0.0708491	0.54503	0.0804221	0.611683	0.0784919	0.606452	0.0756759	0.600706	0.0791166	0.603094	0.0763821	0.58195	0.0814337	0.58265	0.0823056	0.638455	0.0772305	0.58978	0.0829763	0.630118	0.0782063	0.610254	0.0830419	0.642664	0.0784183
		0.711186	0.0888143	0.945702	0.110536			0.438826	0.06236	0.484687	0.0630999	0.510592	0.0694981	0.526261	0.0702764	0.545091	0.0697293	0.554505	0.0705986	0.502627	0.0746989	0.529618	0.0743147	0.580506	0.0711527	0.539567	0.0788179	0.607842	0.0773617	0.61562	0.0762488	0.596798	0.0779361	0.612232	0.0769183	0.577327	0.0799376	0.577729	0.0807577	0.648139	0.0776595	0.584824	0.0814121	0.639459	0.0788735	0.605825	0.0816163	0.653291	0.0788812
		0.715785	0.0896724	0.979022	0.113511			0.437712	0.0613632	0.495104	0.063605	0.509333	0.0684296	0.525104	0.0693341	0.556207	0.0704747	0.565456	0.0714573	0.501075	0.073366	0.528273	0.073131	0.592836	0.0718843	0.537775	0.0773586	0.606601	0.0764659	0.627862	0.0772524	0.595538	0.0769994	0.624432	0.0778907	0.57583	0.0786395	0.576128	0.0793884	0.661066	0.0785296	0.583212	0.080033	0.651934	0.0799752	0.604396	0.0804104	0.667477	0.0798324
		0.734713	0.0900522	1.01291	0.116493			0.438971	0.0605584	0.507673	0.0644642	0.510753	0.0675874	0.526413	0.0686186	0.569622	0.0715915	0.578675	0.0726753	0.502764	0.0722123	0.529776	0.0721546	0.607717	0.0730121	0.539703	0.0760841	0.607993	0.075829	0.642643	0.0786428	0.596959	0.0763321	0.63916	0.0792566	0.577501	0.0775748	0.577891	0.078235	0.676673	0.0798028	0.58499	0.0788768	0.666999	0.0814632	0.606005	0.0794572	0.684601	0.0812302
		0.749667	0.0916655	1.04738	0.119483			0.442568	0.0599674	0.521843	0.0656402	0.514813	0.0669947	0.530151	0.0681494	0.584751	0.0730308	0.593584	0.0741995	0.507647	0.0712691	0.534084	0.0714121	0.624498	0.0744867	0.545298	0.0750291	0.61198	0.0754683	0.659316	0.0803594	0.601024	0.0759524	0.655772	0.0809565	0.582293	0.0767725	0.58297	0.0773291	0.694275	0.0814234	0.590108	0.0779749	0.683996	0.0832725	0.610608	0.0787827	0.703915	0.0830136
		0.72869	0.0916662	1.08245	0.122481			0.448405	0.0596063	0.536996	0.0670814	0.521402	0.0666674	0.536217	0.0679394	0.600931	0.0747298	0.609532	0.075963	0.515591	0.0705622	0.54108	0.0709239	0.642448	0.0762437	0.554408	0.0742223	0.618454	0.0753936	0.677153	0.082327	0.607621	0.0758706	0.673543	0.0829159	0.590078	0.0762545	0.591226	0.0766954	0.713105	0.0833207	0.598427	0.0773519	0.70218	0.085324	0.61808	0.0784052	0.724576	0.0851045
		0.761387	0.0919774	1.11811	0.125487			0.456323	0.0594851	0.552469	0.0687249	0.530341	0.0666147	0.544445	0.0679943	0.617456	0.0766142	0.625822	0.077889	0.52638	0.0701109	0.550574	0.0707031	0.660781	0.0782063	0.566784	0.0736858	0.627238	0.075607	0.695374	0.0844598	0.616569	0.076089	0.691695	0.0850493	0.600641	0.076035	0.602435	0.076351	0.732339	0.0854117	0.60972	0.0770249	0.720759	0.0875281	0.628218	0.078335	0.745679	0.0874118
		0.733325	0.0921488	1.15438	0.128501			0.466105	0.059607	0.567587	0.0704988	0.541385	0.0668379	0.55461	0.0683126	0.633604	0.0786016	0.641741	0.0798932	0.539718	0.0699275	0.562306	0.0707558	0.678696	0.0802887	0.582089	0.0734342	0.638092	0.0761027	0.713183	0.0866644	0.627627	0.0766017	0.709436	0.0872635	0.613694	0.0761198	0.616291	0.0763055	0.751137	0.087605	0.623679	0.0770027	0.738918	0.0897883	0.640744	0.0785741	0.766303	0.0898344
		0.762487	0.0932677	1.19128	0.131524			0.477484	0.0599687	0.581688	0.0723256	0.554233	0.0673309	0.566435	0.0688856	0.648668	0.0806052	0.656595	0.081888	0.555243	0.070017	0.575957	0.0710806	0.695409	0.0824	0.599905	0.0734744	0.65072	0.0768672	0.729802	0.0888445	0.64049	0.0773945	0.72599	0.0894616	0.628883	0.0765068	0.632415	0.0765601	0.768677	0.0898048	0.639923	0.077286	0.755866	0.092006	0.655317	0.0791159	0.785547	0.0922665
		0.770139	0.0937028	1.2288	0.134554			0.490152	0.0605603	0.594156	0.0741255	0.568536	0.0680802	0.579598	0.0696977	0.66199	0.0825374	0.669733	0.0837862	0.57253	0.0703769	0.591154	0.0716687	0.710192	0.0844478	0.619747	0.0738053	0.664778	0.0778795	0.744504	0.0909049	0.654809	0.0784459	0.740633	0.0915476	0.645792	0.0771854	0.650368	0.0771078	0.784192	0.091915	0.658009	0.077867	0.770861	0.0940842	0.67154	0.0799457	0.802568	0.0946019
		0.777902	0.0957478	1.26697	0.137593			0.503761	0.0613657	0.604447	0.0758198	0.583902	0.0690655	0.59374	0.0707266	0.672989	0.0843138	0.680583	0.0855049	0.591109	0.0709975	0.607483	0.0725039	0.722397	0.0863426	0.641072	0.0744179	0.679883	0.0791121	0.756647	0.0927555	0.670193	0.0797273	0.752726	0.0934304	0.66396	0.0781369	0.66966	0.0779337	0.797005	0.0938432	0.677443	0.0787299	0.783248	0.0959321	0.688969	0.0810408	0.816624	0.0967384
		0.818964	0.0976427	1.30579	0.140639			0.517941	0.0623629	0.61211	0.0773344	0.599913	0.0702599	0.608475	0.0719445	0.681183	0.0858568	0.688668	0.086969	0.610471	0.0718617	0.624498	0.0735636	0.73149	0.0880016	0.6633	0.0752953	0.695622	0.0805314	0.7657	0.0943154	0.686223	0.0812037	0.76174	0.0950276	0.682892	0.0793356	0.689765	0.0790152	0.806555	0.0955052	0.697696	0.0798511	0.792486	0.0974689	0.70713	0.0823714	0.827101	0.0985827
		0.819486	0.0990448	1.34528	0.143694			0.532304	0.0635248	0.61681	0.0786033	0.616131	0.0716308	0.6234	0.073318	0.686214	0.0870988	0.693637	0.0881144	0.630091	0.0729461	0.641735	0.0748187	0.737076	0.0893524	0.685824	0.0764138	0.711565	0.0820986	0.771267	0.0955164	0.702461	0.0828347	0.767281	0.0962694	0.702071	0.0807487	0.710134	0.0803229	0.812425	0.0968285	0.718215	0.0812001	0.79817	0.0986274	0.725527	0.0839011	0.833539	0.100054
		0.858501	0.100239	1.38544	0.146757			0.54646	0.0648196	0.618343	0.0795708	0.632115	0.0731407	0.63811	0.0748097	0.687863	0.0879856	0.695272	0.0888912	0.649431	0.0742211	0.658725	0.0762352	0.738909	0.0903359	0.708029	0.0777428	0.727279	0.083771	0.773105	0.0963061	0.718464	0.084576	0.769106	0.0971016	0.720974	0.0823376	0.730212	0.0818211	0.814359	0.0977551	0.73844	0.0827401	0.800053	0.0993571	0.743658	0.0855882	0.835658	0.101089
		0.829685	0.10056	1.42629	0.149828			0.560022	0.0662119	Black	Black	0.647429	0.0747485	0.652202	0.0763788	Black	Black	Black	Black	0.667965	0.0756518	0.675002	0.0777742	Black	Black	0.72931	0.079246	0.742335	0.085503	Black	Black	0.733796	0.0863799	Black	Black	0.739085	0.084059	0.749451	0.0834688	Black	Black	0.757821	0.084429	Black	Black	0.761029	0.0873867	Black	Black
		0.852911	0.10059	1.42861	0.15			0.572619	0.067664			0.661654	0.0764104	0.665292	0.0779826					0.685186	0.0771992	0.690124	0.0793939			0.749087	0.0808825	0.756321	0.0872473			0.748038	0.0881974			0.755911	0.0858659	0.767327	0.0852213			0.775827	0.0862208			0.777166	0.0892476
		0.821626	0.100865	IsoLine	IsoLine			0.58391	0.069136			0.674403	0.078081	0.677023	0.0795774					0.700626	0.0788212	0.703678	0.08105			0.766819	0.0826076	0.768857	0.0889564			0.760802	0.0899788			0.770993	0.0877092	0.783351	0.0870306			0.791968	0.0880666			0.791629	0.0911201
		0.875506	0.102171					0.593584	0.0705879			0.685328	0.0797148	0.687076	0.0811196					0.713863	0.0804735	0.715295	0.0826975			0.782024	0.0843742	0.779599	0.0905836			0.77174	0.0916755			0.783918	0.0895384	0.797087	0.0888475			0.805803	0.0899161			0.804022	0.0929531
		0.849227	0.102513					0.601379	0.0719801			0.694131	0.0812671	0.695175	0.0825672					0.724536	0.0821111	0.724656	0.0842912			0.794287	0.0861342	0.788257	0.0920846			0.780554	0.0932413			0.794335	0.0913037	0.80816	0.0906223			0.816956	0.0917188			0.814009	0.0946966
		0.880839	0.103253					0.607082	0.0732746			0.700571	0.0826956	0.701101	0.0838806					0.732354	0.0836891	0.731508	0.0857879			0.803272	0.0878396	0.794592	0.0934183			0.787002	0.0946334			0.801959	0.0929569	0.816268	0.0923066			0.825122	0.0934255			0.821316	0.096303
		0.902896	0.104225					0.610537	0.074436			0.704474	0.0839614	0.70469	0.0850241					0.737103	0.0851647	0.735663	0.0871466			0.808735	0.0894437	0.798433	0.0945485			0.79091	0.0958139			0.806582	0.094453	0.821189	0.0938546			0.830078	0.0949897			0.825745	0.0977286
		0.857679	0.104552					0.61165	0.0754328			0.705733	0.08503	0.705847	0.0859665					0.738655	0.0864976	0.737008	0.0883303			0.810527	0.090903	0.799674	0.0954442			0.79217	0.0967506			0.808079	0.0957511	0.82279	0.0952239			0.831689	0.0963687			0.827175	0.0989345
		0.879595	0.106158					Black	Black			Black	Black	Black	Black					Black	Black	Black	Black			Black	Black	Black	Black			Black	Black			Black	Black	Black	Black			Black	Black			Black	Black
		0.904032	0.108026
		0.954171	0.108073
		0.914266	0.108638
		0.951947	0.111704
		0.963249	0.114535
		1.12223	0.127812
		1.17626	0.131451
		1.25863	0.133158
		1.93117	0.183949
		1.9875	0.182575
		2.35345	0.215836
		2.33775	0.211444
		2.29094	0.204935
		2.49089	0.22227
		2.61807	0.217598
		3.16108	0.259729
		2.89681	0.231913
		3.27091	0.252465
		3.7743	0.289458
		4.57223	0.304681
		5.32292	0.346401
		4.75961	0.304947
		5.19783	0.3265
		6.34494	0.382854
		5.47736	0.329173
		6.35845	0.378896
		5.90242	0.35109
		5.47269	0.323484
		6.69926	0.394822
		6.7128	0.391832
		5.70158	0.331895
		6.68742	0.388911
		5.83902	0.337729
		6.80159	0.393094
		6.65514	0.3829
		6.7354	0.385642
		7.10789	0.404621
		6.4306	0.365602
		7.19682	0.406384
		6.42018	0.362027
		6.77921	0.381817
		6.89258	0.386379
		IsoLine	IsoLine
[truncated: 148 more columns]

## Sheet: data table
EC-PO-293	207Pba	Ub	Pbb	Thb	206Pbcc	206Pbd	±2s	207Pbd	±2s	207Pbd	±2s	rhoe	206Pb	±2s	207Pb	±2s	207Pb	±2s	conc.
Spot number	(cps)	(ppm)	(ppm)	U	(%)	238U	(%)	235U	(%)	206Pb	(%)		238U	(Ma)	235U	(Ma)	206Pb	(Ma)	(%)
A-125	36319.6	159.123	66.2126	0.770936	0.0275368	0.3954	9.94501	7.243	10.235	0.1329	2.4	0.971665	2147.75	181.656	2141.85	91.3174	2136.19	42.3135	100.541
A-126	9310.72	562.92	52.1515	0.17457	0.149578	0.0937	10.0274	0.7701	10.4942	0.05963	3.1	0.955511	577.399	55.3807	579.843	46.3599	589.428	67.1355	97.9591
A-127	21358.2	257.753	56.8022	0.498858	0.111161	0.2176	9.99007	2.618	10.3746	0.08729	2.8	0.962935	1269.17	115.09	1305.72	76.2264	1366.28	53.8808	92.8923
A-128	16776.5	515.948	95.201	0.18607	0.0283995	0.1839	9.91026	1.931	10.4157	0.07616	3.2	0.951472	1088.51	99.2587	1091.94	69.6784	1098.79	64.1329	99.0648
A-129	17466.7	77.0232	33.5694	0.659451	0.0460061	0.4141	9.85318	7.593	10.1375	0.133	2.4	0.971957	2233.57	185.998	2184.04	90.9553	2137.85	41.689	104.477
A-130	4724.99	171.118	18.8299	0.909377	0	0.1112	10.0253	0.9257	11.5735	0.06038	5.8	0.866226	679.849	64.6858	665.395	56.4921	616.731	124.851	110.234
A-131	10026.1	513.42	40.325	0.483559	0.0275259	0.07968	9.86437	0.6174	10.313	0.05621	3	0.956499	494.204	46.9282	488.186	39.9708	460.041	66.7118	107.426
A-132	7460.2	229.477	29.1025	1.48235	0.0407053	0.1278	9.93863	1.122	10.6435	0.0637	3.8	0.933772	775.371	72.6072	764.044	57.1486	731.054	80.7021	106.062
A-133	10635.9	404.198	41.7782	0.58052	0.13198	0.1046	9.85236	0.8577	10.4384	0.05951	3.4	0.943853	641.029	60.1179	628.855	48.935	585.315	74.8472	109.519
A-134	14125.5	455.405	50.0218	0.630124	0.0285718	0.1105	9.92354	1.006	10.2412	0.06607	2.5	0.968985	675.469	63.6381	706.91	52.152	808.129	52.9582	83.5843
A-135	145867	458.229	268.517	0.272411	0.008714	0.5388	9.92409	12.87	10.1359	0.1734	2.1	0.979105	2778.41	224.002	2670.5	95.5001	2589.78	34.3906	107.283
A-136	35035.7	232.62	43.3386	0.138628	0.59833	0.1745	10.4408	3.613	11.1838	0.1502	4	0.933562	1037.08	100.018	1552.29	88.9391	2347.19	68.5347	44.1837
A-137	110309	403.72	167.482	0.20165	0.0194537	0.3823	9.94485	8.986	10.1051	0.1705	1.8	0.984138	2087.03	177.305	2336.59	92.331	2562.31	29.9918	81.451
A-138	16841.9	80.0406	34.1624	1.61591	0	0.4088	10.3669	6.949	12.0072	0.1233	6.1	0.863395	2209.38	193.92	2104.97	106.582	2004.41	107.558	110.226
A-139	28992.9	134.081	52.4422	0.691667	0.00272225	0.3721	10.085	6.742	10.4068	0.1314	2.6	0.969082	2039.23	176.303	2078.12	92.0194	2116.89	45.0093	96.3311
A-140	24782.9	110.628	49.6563	0.61045	0.0349576	0.4269	9.91067	7.756	10.1228	0.1318	2.1	0.979047	2291.67	191.137	2203.16	91.0466	2121.8	36.1126	108.006
A-141	7423	283.362	30.2936	0.838349	0	0.108	10.0245	0.904	10.3305	0.06071	2.5	0.970379	661.272	63.0028	653.88	49.8038	628.454	53.7785	105.222
A-142	39344.1	199.034	81.4916	0.553442	0.138087	0.3918	9.87488	6.713	10.1125	0.1243	2.2	0.976506	2131.32	179.21	2074.31	89.3673	2018.16	38.6288	105.607
A-143	202.036	2.15389	#VALUE!	0.57193	0	#VALUE!	#VALUE!	#VALUE!	#VALUE!	-14.03	#VALUE!	#VALUE!	#VALUE!	#VALUE!	#VALUE!	#VALUE!	0	#VALUE!	#VALUE!
A-144	49014.2	594.75	140.089	0.336	0.0261629	0.2319	9.98786	2.897	10.124	0.09062	1.7	0.986552	1344.52	121.209	1381.08	76.4176	1438.06	31.5489	93.4956
A-149	6024.32	295.743	25.9345	0.610304	0.0809799	0.08881	9.94761	0.7112	10.2099	0.05809	2.3	0.97431	548.521	52.3078	545.45	43.0861	532.642	50.3535	102.981
A-150	9148.37	747.657	64.0846	0.221449	0.136158	0.0869	9.98333	0.6823	10.3986	0.05696	2.9	0.960066	537.157	51.4527	528.15	42.8221	489.409	64.1817	109.756
A-151	9114.42	460.88	41.9201	0.232711	0.126898	0.09215	9.89897	0.7333	10.5292	0.05773	3.6	0.940142	568.233	53.8414	558.503	45.2317	519.045	78.7588	109.477
A-152	67047	462.702	207.186	0.0805622	0.042034	0.4234	9.96384	8.102	10.1218	0.1388	1.8	0.984394	2275.9	191.06	2242.47	91.4837	2212.1	30.8962	102.884
A-153	66383	457.302	179.279	0.150731	0.0564499	0.373	9.99645	6.748	10.1113	0.1312	1.5	0.988642	2043.62	175.075	2078.9	89.4171	2114.04	26.6461	96.6691
A-154	2418.67	93.1858	9.99593	1.22838	0.434206	0.1081	10.0052	0.9542	11.9689	0.06405	6.6	0.835936	661.55	62.9066	680.272	59.34	742.731	138.912	89.0698
A-155	22717.3	959.833	103.226	0.651433	0.0198612	0.1086	9.98251	0.9143	10.2139	0.06105	2.2	0.977341	664.834	63.0595	659.323	49.5329	640.518	46.4935	103.796
A-156	58644.7	374.987	113.28	0.196458	1.06014	0.29	10.1335	4.823	10.3422	0.1207	2.1	0.979814	1641.43	146.845	1788.85	86.9778	1965.4	36.8758	83.5163
A-157	27522.3	228.699	56.8901	0.37473	0.632409	0.2322	10.2337	4.949	10.688	0.1546	3.1	0.957502	1346	124.317	1810.67	90.2818	2397.28	52.4334	56.1471
A-158	45445.5	231.258	88.5906	0.583975	0	0.3656	9.97659	6.431	10.1747	0.1276	2	0.980527	2008.67	172.181	2036.46	89.4088	2064.73	35.2323	97.2851
A-159	13456.9	690.461	59.9106	0.983136	0	0.08775	9.83805	0.7224	10.407	0.05972	3.4	0.945332	542.234	51.1634	552.056	44.3182	592.782	73.5682	91.4728
A-160	157773	455.653	235.385	0.5808	0	0.4705	10.405	12.02	10.8559	0.1853	3.1	0.958466	2485.67	214.606	2605.86	101.762	2700.65	51.1174	92.0399
A-161	11223	167.347	36.3234	0.714188	0	0.2158	9.93213	2.353	10.4265	0.07911	3.2	0.952588	1259.84	113.66	1228.6	74.2986	1174.2	62.7744	107.293
A-162	2506.49	97.6026	9.72306	1.03274	0.164595	0.1006	9.8943	0.8529	11.4257	0.06151	5.7	0.865966	617.865	58.2951	626.245	53.4027	656.634	122.552	94.0958
A-163	9403.29	295.54	39.2152	0.112073	0	0.1332	9.96718	1.259	10.4381	0.06857	3.1	0.954881	805.857	75.5036	827.29	59.0616	885.325	64.0824	91.0239
A-164	3408.13	171.259	15.7882	0.885017	0.0800036	0.09327	9.88689	0.7625	10.7013	0.05931	4.1	0.923894	574.834	54.373	575.444	47.0083	577.852	88.9876	99.4777
A-165	3786.64	217.763	15.3774	0.457373	0	0.07171	9.96259	0.5443	11.1104	0.05507	4.9	0.896689	446.446	42.9724	441.274	39.7632	414.387	109.919	107.737
A-166	2486.99	130.284	10.4095	0.430192	0	0.08069	10.0448	0.6815	11.2115	0.06127	5	0.895936	500.268	48.3504	527.663	46.1371	647.999	106.961	77.202
A-167	27783.5	147.133	60.5077	0.456453	0.0347885	0.3902	9.85829	7.241	10.2787	0.1346	2.9	0.9591	2123.81	178.377	2141.51	91.7028	2158.53	50.7653	98.3917
A-168	82182.7	688.701	216.449	0.428715	0.00633153	0.3047	9.93577	4.572	10.1003	0.1089	1.8	0.983707	1714.48	149.576	1744.22	84.1521	1780.06	33.117	96.3157
A-173	12437.6	669.81	56.9304	0.725255	0.0986038	0.0861	10.0204	0.6859	10.3822	0.05779	2.7	0.965154	532.457	51.2105	530.362	42.891	521.357	59.6095	102.129
A-174	22439.4	131.489	53.0927	1.28013	0.0606506	0.3856	9.97462	6.735	10.3703	0.1267	2.8	0.961841	2102.59	178.957	2077.28	91.6861	2052.28	50.1012	102.451
A-175	109740	707.245	268.517	0.417548	0.0157927	0.362	9.93614	6.42	10.1457	0.1287	2.1	0.979342	1991.77	170.251	2035.03	89.1345	2079.18	36.1148	95.796
A-176	14425	83.3076	33.778	0.777289	0.0502906	0.3864	9.84573	6.893	10.319	0.1294	3.1	0.954135	2106.01	176.888	2097.7	91.5021	2089.56	54.3182	100.787
A-177	19459.8	252.685	86.6559	0.0636126	0.0461833	0.3292	9.81351	5.477	10.0118	0.1207	2	0.980195	1834.37	156.67	1897.05	85.9637	1966.34	35.3586	93.2884
A-178	7645.26	318.273	31.6127	0.221362	0.1156	0.1002	10.1235	0.8585	10.6308	0.06213	3.2	0.952285	615.81	59.4565	629.304	49.8623	678.098	69.3433	90.8143
A-179	10223.6	489.574	48.8005	0.550339	0.287058	0.1009	10.051	0.8216	10.3442	0.0591	2.4	0.97166	619.476	59.3655	608.955	47.374	570.004	53.2084	108.679
A-180	31899.6	224.564	77.9021	0.81192	0.635023	0.3319	9.97856	5.702	10.2083	0.1246	2.2	0.977499	1847.56	160.294	1931.61	88.186	2023.02	38.1501	91.3266
A-181	25577.6	426.768	95.5742	0.268557	0.0188685	0.2223	9.96984	2.491	10.2874	0.0813	2.5	0.969131	1293.86	116.875	1269.39	74.5339	1228.17	49.7972	105.349
A-182	17629.1	99.5955	40.9515	0.589386	b.d.	0.3931	9.87085	6.802	10.0829	0.1255	2.1	0.978972	2137.16	179.551	2085.93	89.2568	2035.74	36.3876	104.982
A-183	21299.7	237.224	61.9914	0.6937	0.00679466	0.2546	9.89958	3.613	10.0093	0.103	1.5	0.989033	1462.17	129.507	1552.44	79.6022	1677.55	27.3105	87.1614
A-184	15910.3	108.261	39.6403	1.32226	0.0296548	0.3511	10.1505	5.902	10.4126	0.122	2.3	0.974826	1939.8	170.035	1961.59	90.4102	1984.66	41.3155	97.7397
A-185	30600.8	192.025	76.9007	0.751941	0	0.3818	10.0445	6.779	10.2105	0.1288	1.8	0.983739	2084.76	178.916	2083.01	90.3486	2081.28	32.2742	100.167
A-186	14420.7	174.668	44.9173	0.650589	0.0372301	0.2525	9.86435	3.271	10.2411	0.09399	2.8	0.963211	1451.18	128.181	1474.16	79.6389	1507.41	51.9854	96.2696
A-187	5185.18	322.142	25.071	0.466837	0.08039	0.07897	9.93783	0.6088	10.6086	0.05593	3.7	0.936771	489.983	46.8891	482.814	40.7632	448.918	82.4738	109.148
A-188	70447.6	523.76	185.012	0.58194	0	0.3377	9.89536	5.839	10.118	0.1254	2.1	0.977996	1875.74	161.046	1952.22	87.7143	2034.34	37.3483	92.2037
A-189	4314.5	268.888	21.8979	0.896666	0.288584	0.08213	9.92337	0.7125	11.1527	0.06294	5.1	0.889774	508.822	48.551	546.227	47.1153	705.488	108.296	72.1233
A-190	11414.9	506.71	53.2065	0.486687	0	0.1062	10.3298	0.8796	11.3636	0.06011	4.7	0.909028	650.397	63.9067	640.764	53.9963	606.947	102.41	107.159
A-191	11775.3	78.6896	31.0888	0.80414	0.114554	0.3789	9.92092	6.358	10.3739	0.1217	3	0.956331	2071.12	175.735	2026.55	91.0204	1981.46	53.979	104.525
A-192	3597.1	180.524	18.2768	0.45587	0	0.1022	10.0074	0.8755	14.4073	0.06217	10	0.694603	627.12	59.8023	638.553	68.2895	679.217	221.467	92.3298
A-197	2805.97	121.603	12.4388	0.430338	0	0.1033	10.3432	0.8808	11.4763	0.06189	5	0.901262	633.445	62.4022	641.435	54.5729	669.677	106.416	94.5896
A-198	2941.21	38.2022	11.2692	0.916252	0	0.2895	10.4883	3.774	12.8262	0.0946	7.4	0.817724	1638.82	151.775	1587.29	102.957	1519.51	139.226	107.852
A-199	12518.3	127.927	33.0958	0.0859611	1.19344	0.2461	10.5968	4.465	11.1061	0.1316	3.3	0.954137	1418.22	134.903	1724.54	92.136	2119.5	58.2635	66.9132
A-200	109160	467.855	236.374	0.0847137	0.223163	0.4717	10.0232	10.04	10.2629	0.1545	2.2	0.97665	2490.86	207.086	2438.66	94.7701	2395.39	37.5089	103.985
A-201	8917.63	53.6384	22.6693	0.634612	0.3322	0.4027	10.0989	7.185	10.8123	0.1294	3.9	0.934016	2181.62	186.911	2134.7	96.3739	2089.83	67.9113	104.392
A-202	516.664	52.007	4.89604	0.391779	2.21673	0.09695	10.313	0.5256	22.2791	0.03933	20	0.462901	596.494	58.7562	428.904	77.9393	-395.27	514.567	-150.908
A-203	1044.9	59.5985	5.42185	0.433257	1.24736	0.09198	10.6548	0.7614	14.3919	0.06006	9.7	0.74033	567.221	57.8534	574.81	63.1682	604.93	209.296	93.7664
A-204	55971	238.172	119.799	0.235628	0.431555	0.4634	9.98256	10.91	10.4134	0.1709	3	0.958631	2454.6	203.779	2515.81	96.8604	2565.58	49.5744	95.6743
A-205	8579.36	52.2359	21.2359	0.573307	0	0.3889	10.2675	6.687	11.0549	0.1247	4.1	0.928771	2117.77	185.335	2070.96	97.6477	2024.71	72.5808	104.596
A-206	1484.47	92.6436	8.20135	0.27616	0	0.08967	10.341	0.7158	12.7154	0.05791	7.4	0.813267	553.6	54.8586	548.176	53.8618	525.697	162.219	105.308
A-207	1184.78	3.13417	#VALUE!	0.0920267	0	#VALUE!	#VALUE!	#VALUE!	#VALUE!	10.17	#VALUE!	#VALUE!	#VALUE!	#VALUE!	#VALUE!	#VALUE!	8347.02	#VALUE!	#VALUE!
A-208	56517.8	368.77	156.325	0.275212	0.164857	0.4046	9.90077	7.108	10.1475	0.1274	2.2	0.975683	2190.28	183.855	2125.03	90.3281	2062.49	39.2275	106.196
A-209	1563.32	82.4429	8.35952	0.366496	0	0.1025	9.95542	0.8492	11.8544	0.0601	6.4	0.839807	629.121	59.6725	624.225	55.2769	606.52	139.184	103.726
A-210	3048.23	185.344	18.1565	0.510724	0	0.09904	10.0925	0.8195	13.7943	0.06003	9.4	0.731644	608.809	58.6317	607.762	63.0842	603.86	203.459	100.82
A-211	12858.7	756.355	67.3163	0.247629	0	0.09005	10.5951	0.7347	11.2263	0.05919	3.7	0.94377	555.846	56.4246	559.315	48.2789	573.459	80.7156	96.9286
A-212	4344.1	54.161	18.2837	0.211239	0	0.3235	9.99493	5.473	11.4013	0.1227	5.5	0.876646	1806.72	157.482	1896.32	97.8817	1995.86	97.4921	90.5233
A-213	17224.7	123.465	50.8864	0.423008	0.313	0.3948	10.249	6.699	10.7609	0.1231	3.3	0.952427	2145.15	187.017	2072.52	95.0727	2001.09	58.2502	107.199
A-214	110372	444.474	254.022	0.817828	0	0.5262	10.1316	12.45	10.2631	0.1716	1.6	0.98719	2725.54	225.192	2638.67	96.4596	2572.7	27.3669	105.941
A-215	16732.5	155.285	55.6087	0.393442	0.222161	0.3464	10.6029	5.323	10.9939	0.1115	2.9	0.964435	1917.39	175.852	1872.55	93.975	1823.15	52.7177	105.169
A-216	45750.9	198.825	111.807	0.248242	0	0.5216	10.2213	11.68	10.5793	0.1624	2.7	0.966164	2706.05	225.878	2578.78	98.9457	2480.23	46.0227	109.105
A-221	9223.15	76.2166	14.2897	0.503764	1.23037	0.1753	10.5509	3.691	11.4138	0.1528	4.4	0.924393	1041.1	101.434	1569.43	91.1886	2376.74	74.2087	43.8034
A-222	4203.75	269.677	23.1293	0.480721	0	0.08687	10.3572	0.6939	11.5778	0.05794	5.2	0.894575	537.029	53.3674	535.113	48.1557	526.957	113.42	101.911
A-223	5514.77	50.1691	16.9909	0.609972	0.408463	0.3265	10.0511	5.198	11.0663	0.1155	4.6	0.908256	1821.4	159.48	1852.26	94.236	1887.1	83.3544	96.5184
A-224	20099.5	176.664	51.3817	0.402491	0.375438	0.2788	10.0377	4.702	10.5955	0.1224	3.4	0.94736	1585.24	141.067	1767.62	88.7173	1990.46	60.3282	79.6421
A-225	2910.74	175.632	16.9737	0.799812	0	0.09764	10.5397	0.819	13.4886	0.06085	8.4	0.781375	600.579	60.4399	607.47	61.6649	633.259	181.241	94.8394
A-226	2354.23	115.402	11.9256	0.398472	0	0.1042	10.788	0.9029	12.6554	0.06285	6.6	0.852446	639.12	65.6406	653.274	60.9715	702.475	140.839	90.9811
A-227	5865.96	316.334	35.8658	0.986431	0.87312	0.1145	10.5875	0.9632	11.3373	0.06101	4.1	0.933865	699.031	70.1383	684.978	56.4809	639.084	87.2125	109.38
A-228	869.202	67.6302	5.61814	0.48695	0	0.08413	10.4072	0.6742	16.529	0.05813	13	0.629633	520.732	52.0626	523.233	67.5833	534.163	281.133	97.4856
A-229	6163.7	162.719	29.8728	0.330017	0	0.1826	10.556	1.987	11.6016	0.07897	4.8	0.909873	1081.03	105.058	1111.27	78.3696	1170.93	95.2906	92.322
A-230	3980.72	327.54	25.3455	0.135368	0	0.0781	10.4711	0.6683	11.3871	0.06209	4.5	0.919565	484.751	48.8974	519.705	46.3186	676.449	95.6519	71.6611
A-231	1498.33	83.8563	8.74725	0.957921	0	0.105	10.9033	0.9383	12.9803	0.06482	7	0.839987	643.788	66.8026	671.999	63.8025	767.758	148.341	83.8529
A-232	2592.67	157.416	17.4189	1.19033	0.676624	0.1117	10.3714	0.9519	11.8218	0.06183	5.7	0.877308	682.634	67.1789	679.116	58.5409	667.47	121.468	102.272
A-233	4670.96	295.469	27.9542	1.31304	0	0.09575	10.9235	0.7779	11.9592	0.05894	4.9	0.913399	589.441	61.5315	584.286	53.1309	564.303	106.035	104.455
A-234	1418.2	95.4216	8.63328	0.646992	0	0.09167	10.3765	0.7287	13.3231	0.05767	8.4	0.778834	565.384	56.1677	555.784	57.0242	516.652	183.498	109.432
A-235	36158.7	150.477	88.6011	0.738824	0.44582	0.5354	10.2012	13.83	10.5025	0.1873	2.5	0.971308	2764.13	229.309	2737.87	99.4478	2718.55	41.1691	101.677
A-236	1034.32	96.9989	7.64304	0.560851	0	0.07993	10.2307	0.6199	15.6584	0.05626	12	0.653371	495.716	48.8145	489.763	60.8409	462.013	262.75	107.295
A-237	2574.32	218.573	16.7493	0.10182	0	0.07765	10.2303	0.6155	11.9974	0.0575	6.3	0.852707	482.082	47.5195	487.008	46.4118	510.249	137.771	94.4798
A-238	1886.27	183.364	12.3568	0.608723	0	0.0684	10.6473	0.5247	13.5437	0.05565	8.4	0.786142	426.497	43.9408	428.274	47.3243	437.846	186.318	97.408
A-239	23760.2	440.102	115.866	0.200466	0.128428	0.2597	10.4674	3.161	10.7477	0.0883	2.4	0.97392	1488.46	139.123	1447.71	82.9039	1388.37	46.8098	107.209
A-240	12802.2	138.837	43.8332	0.537247	0.164672	0.3049	10.0239	4.76	10.5681	0.1132	3.3	0.948505	1715.79	151.003	1777.8	88.6759	1851.41	60.5226	92.6748
A-245	7375.69	64.2602	27.3827	0.635124	0.458559	0.4064	10.3855	7.197	11.344	0.1285	4.6	0.915507	2198.37	193.454	2136.11	101.132	2076.74	80.3591	105.857
A-246	1170.32	101.406	8.07435	0.790268	0	0.08073	10.1621	0.6326	13.4795	0.05685	8.9	0.753892	500.483	48.9355	497.74	53.0361	485.144	195.517	103.162
A-247	32282.7	112.676	28.9162	1.06553	0	0.2222	15.705	7.676	19.7544	0.2506	12	0.795012	1293.72	184.088	2193.82	177.464	3187.96	189.659	40.5813
A-248	1551.78	132.599	11.5487	0.781888	0	0.0882	10.3998	0.7075	14.3492	0.05819	9.9	0.724766	544.888	54.3384	543.232	60.3677	536.286	216.366	101.604
A-249	9714.87	87.3362	34.996	0.576563	0	0.3829	10.2844	6.655	11.3591	0.1261	4.8	0.905391	2089.82	183.566	2066.69	100.271	2043.71	85.2415	102.256
A-250	1429.94	120.256	10.896	0.980382	0	0.09167	10.344	0.7497	12.8088	0.05933	7.6	0.807576	565.379	55.9919	568.031	55.725	578.66	164.141	97.7048
A-251	7257.98	70.2456	28.0072	1.15118	0	0.3829	10.0755	6.345	10.587	0.1202	3.3	0.951692	2089.6	179.822	2024.69	92.8625	1959.14	58.022	106.659
A-252	2551.56	232.347	19.741	0.322622	0	0.08596	10.0476	0.7031	11.2181	0.05935	5	0.895657	531.57	51.2672	540.663	47.0263	579.192	108.399	91.778
A-253	117782	561.916	316.9	0.610187	0	0.513	11.6329	13.21	12.1755	0.1868	3.6	0.955434	2669.49	254.269	2694.91	114.929	2714.03	59.2669	98.3587
A-254	1730.72	189.931	14.7237	0.402682	0	0.07899	10.7804	0.5582	15.8369	0.05127	12	0.680712	490.076	50.8738	450.359	57.6064	252.315	266.864	194.232
A-255	6568.21	386.017	50.4025	1.18165	0	0.1315	10.1345	1.176	11.9006	0.06492	6.2	0.851594	796.136	75.9008	789.572	65.3118	771.078	131.319	103.25
A-256	21583.5	1886.57	162.348	0.280903	0	0.0872	10.465	0.692	13.7124	0.05757	8.9	0.763174	538.928	54.1056	533.974	56.9421	512.864	194.696	105.082
A-257	6162.36	517.963	41.4085	0.353501	0	0.08095	10.2016	0.6512	11.0029	0.05836	4.1	0.927172	501.779	49.2479	509.227	44.0615	542.812	90.112	92.4407
A-258	2059.19	219.263	16.6021	0.302048	0	0.07673	10.7854	0.6075	13.2072	0.05744	7.6	0.816632	476.573	49.5464	482.003	50.6816	507.911	167.631	93.8302
A-259	2511.67	197.943	18.377	1.18307	0	0.09354	10.1107	0.8247	12.2606	0.06396	6.9	0.824651	576.466	55.7547	610.641	56.2642	739.545	146.733	77.9488
A-260	18630.3	526.149	108.622	0.314847	0	0.2049	10.1446	2.291	10.7718	0.0811	3.6	0.94178	1201.78	111.226	1209.5	76.1395	1223.3	71.1584	98.2409
A-261	9087.07	269.367	57.332	0.500121	0.197667	0.2114	10.0069	2.338	10.6971	0.08021	3.8	0.935477	1236.5	112.592	1223.84	76.0747	1201.58	74.5047	102.906
A-262	34315.6	457.107	133.46	0.0209937	0.0156382	0.2777	10.2708	5.036	10.4488	0.1315	1.9	0.982963	1579.95	143.917	1825.4	88.5181	2118.21	33.6598	74.5887
A-263	4896.08	404.166	40.192	0.457655	0	0.1006	10.1521	0.8297	10.7374	0.05986	3.5	0.945492	617.69	59.7978	613.437	49.4384	597.769	75.7323	103.332
A-264	1192.57	118.859	10.2464	0.564328	0	0.08731	10.3124	0.6995	14.4071	0.05812	10	0.715781	539.586	53.3788	538.468	60.2087	533.737	220.278	101.096
a within-run background-corrected mean 207Pb signal in counts per second
b U and Pb content and Th/U ratio were calculated relative to GJ-1 and are accurate to approximately 10%.
c corrected for background, mass bias, laser induced U-Pb fractionation and common Pb (if detectable, see analytical method) using
Stacey & Kramers (1975) model Pb composition. 207Pb/235U calculated using 207Pb/206Pb/(238U/206Pb × 1/137.88). Errors are
propagated by quadratic addition of within-run errors (2SE) and the reproducibility of GJ-1 (2SD).
d Rho is the error correlation defined as err206Pb/238U/err207Pb/235U.
