# Supplementary material for: A tectonic carpet of Variscan flysch at the base of a rootless accretionary prism in northwestern Iberia: U–Pb zircon age constrains from sediments and volcanic olistoliths
Source: Copernicus journal article supplement (doi:10.5194/se-12-835-2021), 2021-04-15
Supplement: Supplementary file 5 [file se-12-835-2021-supplement.zip › SUPP TABLES/Supplementary Table 5_AD-PO-66.xls]

## Sheet: PlotDat0
Source sheet	all data	0.527134	0.0692008	0.454796	0.0607196	0.483784	0.0640155	0.513349	0.0673218	0.543504	0.0706383	0.574259	0.0739651	0.605627	0.0773023	0.637621	0.0806498	0.670251	0.0840077	0.44764	0.06	0.448571	0.06	0.446717	0.06	0.425533	0.0574338	0.576893	0.0750906	0.651637	0.0805021	0.662941	0.0814467	0.650513	0.0822098
Plot name	Concordia0	0.594404	0.074844	0.454759	0.0607426	0.483744	0.0640399	0.513307	0.0673474	0.543459	0.0706652	0.574211	0.0739934	0.605576	0.0773318	0.637566	0.0806807	0.670194	0.08404	0.44764	0.06	0.45534	0.0607776	0.44764	0.0601069	0.45389	0.0607196	0.576177	0.075328	0.651039	0.0808564	0.662347	0.0818133	0.649641	0.0826628
Plot Type	1	0.605961	0.0759873	0.454652	0.0607638	0.48363	0.0640623	0.513184	0.067371	0.543327	0.07069	0.574071	0.0740194	0.605427	0.077359	0.637408	0.0807091	0.670025	0.0840696	0.45534	0.0608861	0.463081	0.0616628	0.45534	0.0609946	0.482812	0.0640155	0.574123	0.0753982	0.64934	0.0810937	0.660654	0.0820665	0.64716	0.0829302
1st free col	37	IsoLine	IsoLine	0.454483	0.0607814	0.483448	0.0640809	0.51299	0.0673906	0.54312	0.0707106	0.57385	0.0740409	0.605192	0.0773816	0.637158	0.0807327	0.66976	0.0840942	0.463081	0.0617729	0.470864	0.0625488	0.463081	0.0618831	0.512308	0.0673218	0.570787	0.0752994	0.64657	0.0812094	0.657898	0.0822014	0.643118	0.0830067
Sigma Level	2			0.454267	0.060794	0.483215	0.0640942	0.512741	0.0674046	0.542853	0.0707253	0.573566	0.0740564	0.604889	0.0773978	0.636837	0.0807496	0.66942	0.0841119	0.470864	0.0626605	0.478687	0.0634355	0.470864	0.0627723	0.542391	0.0706383	0.566261	0.0750343	0.642786	0.0812011	0.65413	0.0822153	0.637594	0.0828909
Absolute Errs	FALSE			0.454019	0.0608006	0.48295	0.0641011	0.512456	0.0674119	0.54255	0.070733	0.573242	0.0740644	0.604545	0.0774062	0.63647	0.0807584	0.669031	0.084121	0.478687	0.0635489	0.486553	0.0643229	0.478687	0.0636623	0.573073	0.0739651	0.560667	0.07461	0.63806	0.0810692	0.649425	0.082108	0.630695	0.082585
Symbol Type	1			0.453762	0.0608006	0.482673	0.0641011	0.51216	0.0674119	0.542233	0.070733	0.572904	0.0740644	0.604185	0.0774062	0.636089	0.0807584	0.668626	0.084121	0.486553	0.0644379	0.49446	0.0652111	0.486553	0.064553	0.604365	0.0773023	0.554158	0.0740382	0.632484	0.0808161	0.643873	0.0818815	0.622556	0.082095
Inverse Plot	FALSE			0.453514	0.060794	0.482408	0.0640942	0.511876	0.0674046	0.541929	0.0707253	0.57258	0.0740564	0.603841	0.0773978	0.635722	0.0807496	0.668238	0.0841119	0.49446	0.0653277	0.502409	0.0661	0.49446	0.0654444	0.636279	0.0806498	0.546913	0.0733344	0.626167	0.0804467	0.637584	0.0815404	0.613335	0.0814303
Color Plot	TRUE			0.453297	0.0607814	0.482175	0.0640809	0.511626	0.0673906	0.541663	0.0707106	0.572296	0.0740409	0.603538	0.0773816	0.635401	0.0807327	0.667897	0.0840942	0.502409	0.0662183	0.5104	0.0669897	0.502409	0.0663366	0.668829	0.0840077	0.539128	0.0725179	0.619232	0.0799683	0.63068	0.0810911	0.603212	0.080604
3D plot	FALSE			0.453129	0.0607638	0.481994	0.0640623	0.511432	0.067371	0.541455	0.07069	0.572075	0.0740194	0.603303	0.077359	0.635151	0.0807091	0.667632	0.0840696	0.5104	0.0671096	0.518434	0.0678801	0.5104	0.0672295	IsoLine	IsoLine	0.531016	0.0716109	0.611813	0.0793901	0.623294	0.0805425	0.592383	0.0796321
Linear	FALSE			0.453021	0.0607426	0.481879	0.0640399	0.511309	0.0673474	0.541324	0.0706652	0.571935	0.0739934	0.603154	0.0773318	0.634993	0.0806807	0.667464	0.08404	0.518434	0.0680016	0.526511	0.0687712	0.518434	0.0681232			0.522797	0.0706382	0.604056	0.0787235	0.615571	0.0799053	0.58106	0.0785335
Data Range	AC3:AG5			0.452985	0.0607196	0.481839	0.0640155	0.511267	0.0673218	0.541279	0.0706383	0.571887	0.0739651	0.603103	0.0773023	0.634938	0.0806498	0.667406	0.0840077	0.526511	0.0688944	0.534631	0.0696631	0.526511	0.0690177			0.514698	0.0696262	0.596111	0.0779814	0.60766	0.0791917	0.569462	0.0773296
Filled Symbols	FALSE			0.453021	0.0606965	0.481879	0.0639912	0.511309	0.0672961	0.541324	0.0706113	0.571935	0.0739368	0.603154	0.0772727	0.634993	0.0806188	0.667464	0.0839754	0.534631	0.069788	0.542794	0.0705557	0.534631	0.0699129			0.506937	0.0686027	0.588132	0.0771781	0.599717	0.0784159	0.557816	0.0760439
ConcAge	TRUE			0.453129	0.0606753	0.481994	0.0639688	0.511432	0.0672725	0.541455	0.0705865	0.572075	0.0739108	0.603303	0.0772455	0.635151	0.0805904	0.667632	0.0839458	0.542794	0.0706823	0.551	0.0714491	0.542794	0.0708088			0.499727	0.0675954	0.580276	0.0763295	0.591895	0.0775927	0.546348	0.0747014
ConcSwap	FALSE			0.453297	0.0606577	0.482175	0.0639502	0.511626	0.067253	0.541663	0.070566	0.572296	0.0738893	0.603538	0.0772229	0.635401	0.0805668	0.667897	0.0839212	0.551	0.0715773	0.55925	0.0723432	0.551	0.0717055			0.493265	0.066632	0.572694	0.075452	0.584347	0.0767383	0.535281	0.0733281
1st Symbol-row	1			0.453514	0.0606451	0.482408	0.0639369	0.511876	0.0672389	0.541929	0.0705512	0.57258	0.0738738	0.603841	0.0772067	0.635722	0.0805499	0.668238	0.0839035	0.55925	0.0724731	0.567544	0.0732381	0.55925	0.0726029			0.487727	0.0657386	0.565535	0.0745626	0.57722	0.0758693	0.524831	0.0719509
				0.453762	0.0606385	0.482673	0.06393	0.51216	0.0672316	0.542233	0.0705436	0.572904	0.0738658	0.604185	0.0771983	0.636089	0.0805411	0.668626	0.0838944	0.567544	0.0733696	0.575881	0.0741337	0.567544	0.0735011			0.483264	0.0649397	0.558939	0.0736787	0.570652	0.0750026	0.515202	0.0705966
				0.454019	0.0606385	0.48295	0.06393	0.512456	0.0672316	0.54255	0.0705436	0.573242	0.0738658	0.604545	0.0771983	0.63647	0.0805411	0.669031	0.0838944	0.575881	0.0742669	0.584264	0.0750301	0.575881	0.0744001			0.479997	0.064257	0.553032	0.0728174	0.564771	0.074155	0.50658	0.0692914
				0.454267	0.0606451	0.483215	0.0639369	0.512741	0.0672389	0.542853	0.0705512	0.573566	0.0738738	0.604889	0.0772067	0.636837	0.0805499	0.66942	0.0839035	0.584264	0.0751649	0.592691	0.0759272	0.584264	0.0752998			0.478016	0.0637091	0.54793	0.0719957	0.559692	0.0733431	0.499133	0.0680608
				0.454483	0.0606577	0.483448	0.0639502	0.51299	0.067253	0.54312	0.070566	0.57385	0.0738893	0.605192	0.0772229	0.637158	0.0805668	0.66976	0.0839212	0.592691	0.0760637	0.601162	0.076825	0.592691	0.0762002			0.477375	0.0633111	0.543734	0.0712293	0.555514	0.0725827	0.493007	0.0669288
				0.454652	0.0606753	0.48363	0.0639688	0.513184	0.0672725	0.543327	0.0705865	0.574071	0.0739108	0.605427	0.0772455	0.637408	0.0805904	0.670025	0.0839458	0.601162	0.0769632	0.609679	0.0777237	0.601162	0.0771014			0.478092	0.0630737	0.540523	0.0705333	0.552317	0.0718885	0.48832	0.0659174
				0.454759	0.0606965	0.483744	0.0639912	0.513307	0.0672961	0.543459	0.0706113	0.574211	0.0739368	0.605576	0.0772727	0.637566	0.0806188	0.670194	0.0839754	0.609679	0.0778635	0.618241	0.078623	0.609679	0.0780034			0.480146	0.0630034	0.538361	0.0699213	0.550165	0.0712741	0.485164	0.0650463
				0.454796	0.0607196	0.483784	0.0640155	0.513349	0.0673218	0.543504	0.0706383	0.574259	0.0739651	0.605627	0.0773023	0.637621	0.0806498	0.670251	0.0840077	0.618241	0.0787645	0.626849	0.0795231	0.618241	0.0789061			0.483481	0.0631022	0.53729	0.069405	0.549098	0.0707515	0.4836	0.0643324
				ConcTikEll	ConcTikEll	ConcTikEll	ConcTikEll	ConcTikEll	ConcTikEll	ConcTikEll	ConcTikEll	ConcTikEll	ConcTikEll	ConcTikEll	ConcTikEll	ConcTikEll	ConcTikEll	ConcTikEll	ConcTikEll	0.626849	0.0796663	0.635502	0.080424	0.626849	0.0798095			0.488008	0.0633674	0.537331	0.0689946	0.549139	0.0703307	0.483659	0.0637896
																				0.635502	0.0805689	0.644201	0.0813256	0.635502	0.0807138			0.493601	0.0637916	0.538482	0.068698	0.550285	0.0700201	0.48534	0.0634285
																				0.644201	0.0814722	0.652947	0.082228	0.644201	0.0816188			0.50011	0.0643634	0.540722	0.0685211	0.552515	0.0698256	0.488609	0.0632561
																				0.652947	0.0823762	0.661739	0.0831311	0.652947	0.0825245			0.507355	0.0650672	0.544007	0.0684673	0.555785	0.069751	0.493404	0.0632758
																				0.661739	0.083281	0.670578	0.084035	0.661739	0.083431			0.515141	0.0658837	0.548272	0.0685375	0.560032	0.0697979	0.49963	0.0634872
																				0.670578	0.0841866	0.679464	0.0849396	0.670578	0.0843382			0.523253	0.0667907	0.553436	0.0687305	0.565173	0.0699651	0.507167	0.0638861
																				0.679464	0.0850929	0.688397	0.085845	0.679464	0.0852463			0.531471	0.0677635	0.559397	0.0690425	0.571107	0.0702496	0.515869	0.0644649
																				0.688397	0.086	0.689934	0.086	0.686873	0.086			0.539571	0.0687754	0.566039	0.0694675	0.57772	0.0706458	0.525564	0.0652122
																				0.688397	0.086	ConcBand	ConcBand	ConcBand	ConcBand			0.547331	0.069799	0.573234	0.069997	0.584883	0.071146	0.536066	0.0661135
																				IsoLine	IsoLine							0.554541	0.0708062	0.58084	0.070621	0.592456	0.0717403	0.547169	0.0671513
																												0.561003	0.0717697	0.588711	0.0713271	0.600292	0.0724174	0.558658	0.0683053
																												0.566541	0.072663	0.596692	0.0721016	0.608238	0.0731639	0.570308	0.0695531
																												0.571005	0.073462	0.604629	0.0729296	0.61614	0.0739654	0.581893	0.0708705
																												0.574271	0.0741447	0.612366	0.0737948	0.623843	0.0748062	0.593188	0.0722317
																												0.576252	0.0746925	0.619754	0.0746804	0.631199	0.07567	0.603973	0.0736102
																												0.576893	0.0750906	0.626649	0.0755692	0.638063	0.07654	0.614037	0.0749794
																														0.632916	0.0764439	0.644303	0.0773992	0.623185	0.0763124
																														0.638434	0.0772875	0.649796	0.078231	0.631239	0.0775833
																														0.643094	0.0780835	0.654436	0.0790191	0.638042	0.0787675
																														0.646807	0.0788164	0.658133	0.0797481	0.643462	0.0798418
																														0.6495	0.079472	0.660814	0.080404	0.647393	0.0807854
																														0.65112	0.0800376	0.662427	0.0809739	0.649758	0.0815799
																														0.651637	0.0805021	0.662941	0.0814467	0.650513	0.0822098
																																		Cyan	Cyan

## Sheet: PlotDat1
Source sheet	all data	0.527134	0.0692008	0	0	0.217708	0.0315113	0.576893	0.0750906	0.651637	0.0805021	0.662941	0.0814467	0.678857	0.083172	0.679855	0.0829188	0.690624	0.0855264	0.684872	0.0851538	0.704187	0.084843	0.728545	0.0851677	0.713495	0.0851005	0.697986	0.086113	0.692715	0.0867436	0.703962	0.0870269	0.71843	0.0870385	0.702301	0.0879415	0.701858	0.0882588	0.731081	0.0879406	0.714303	0.0879733	0.726054	0.0884067	0.740171	0.0882634	0.734634	0.0899836
Plot name	Concordia0	0.594404	0.074844	0.141134	0.0210127	0.482812	0.0640155	0.574813	0.0753958	0.649237	0.0811016	0.660552	0.0820752	0.676351	0.0837615	0.677315	0.0836575	0.688121	0.0861626	0.682327	0.085916	0.701148	0.0859134	0.724883	0.0864923	0.710697	0.0860132	0.695677	0.0865009	0.69016	0.08743	0.701481	0.0875511	0.71564	0.0879268	0.699743	0.0885523	0.699293	0.088876	0.728268	0.0887679	0.711611	0.088764	0.723014	0.0894801	0.736449	0.0896614	0.732022	0.0905809
Plot Type	1	0.605961	0.0759873	0.302186	0.0424669	0.805631	0.097544	0.56887	0.0751992	0.642394	0.0811942	0.65374	0.0822105	0.669201	0.0838185	0.670072	0.0838969	0.680986	0.0862714	0.675076	0.0861721	0.692458	0.0864798	0.714381	0.0872777	0.702704	0.0864324	0.689077	0.0863678	0.682884	0.0875801	0.694403	0.0875314	0.70768	0.0882999	0.692452	0.088608	0.691985	0.088935	0.720239	0.089055	0.703937	0.0890206	0.714327	0.0900407	0.725758	0.0905485	0.724569	0.0906201
1st free col	213	0.619039	0.0771884	0.485968	0.064372	1.19873	0.132129	0.559547	0.0745166	0.631664	0.0807724	0.643057	0.0818416	0.657988	0.0833384	0.658714	0.0836175	0.669799	0.085844	0.663707	0.0859011	0.678821	0.0864964	0.697888	0.0874602	0.690162	0.0863242	0.678721	0.0857247	0.671475	0.0871817	0.6833	0.0869694	0.695194	0.0881277	0.681021	0.088104	0.680526	0.0884308	0.707646	0.0887788	0.691903	0.0887224	0.700697	0.090043	0.708965	0.0908526	0.712879	0.0900981
Sigma Level	2	0.619269	0.0774944	0.695688	0.0867373	1.67741	0.167804	0.547597	0.0734034	0.617915	0.0798703	0.629368	0.0809985	0.643619	0.08236	0.64416	0.0828422	0.655464	0.084915	0.64914	0.0851251	0.661342	0.0859618	0.676741	0.0870251	0.674089	0.0856973	0.665446	0.0846236	0.656858	0.0862671	0.669072	0.0859108	0.679194	0.0874241	0.666373	0.0870811	0.665844	0.0874043	0.69151	0.0879615	0.676485	0.0878935	0.683227	0.0894868	0.687431	0.0905493	0.6979	0.0890572
Absolute Errs	FALSE	0.630955	0.0796529	0.935006	0.109573	2.2603	0.204603	0.533989	0.0719497	0.602261	0.078561	0.613784	0.0797493	0.627259	0.0809626	0.62759	0.0816336	0.639144	0.0835598	0.632556	0.083907	0.641436	0.0849193	0.652654	0.0860075	0.655786	0.0846026	0.65033	0.0831538	0.640217	0.0849103	0.652872	0.0844411	0.660976	0.0862461	0.649697	0.0856223	0.649129	0.0859388	0.673136	0.0866694	0.65893	0.0866011	0.663333	0.0884173	0.662899	0.089663	0.680845	0.0875817
Symbol Type	1	0.62424	0.0796672	1.2081	0.132888	2.97009	0.242562	0.519827	0.0702733	0.585971	0.0769505	0.597565	0.0781954	0.610233	0.0792595	0.610345	0.0800896	0.622161	0.081888	0.615298	0.0823454	0.620718	0.0834534	0.627577	0.08449	0.636737	0.0831286	0.634595	0.0814342	0.622901	0.0832213	0.636011	0.0826795	0.642015	0.0846891	0.632343	0.0838456	0.631734	0.0841529	0.654015	0.0850072	0.640663	0.0849498	0.642626	0.086921	0.637358	0.0882655	0.663094	0.085791
Inverse Plot	FALSE	0.631395	0.0796928	1.51974	0.156693	3.83441	0.281716	0.506256	0.06851	0.570364	0.0751694	0.582027	0.0764626	0.59392	0.0773886	0.593824	0.0783354	0.60589	0.0800352	0.598765	0.0805668	0.600864	0.0816828	0.603543	0.0825954	0.618483	0.0813949	0.619518	0.0796043	0.606312	0.0813369	0.619857	0.0807688	0.623849	0.0828793	0.615717	0.0818951	0.61507	0.0821913	0.635694	0.0831095	0.623161	0.0830735	0.622785	0.0851192	0.612876	0.0864701	0.646088	0.0838304
Color Plot	TRUE	0.640443	0.079836	1.87536	0.180998	4.8869	0.322105	0.494376	0.0668027	0.556704	0.073362	0.568428	0.0746913	0.579642	0.0755015	0.579364	0.0765131	0.591649	0.0781514	0.584296	0.0787153	0.583484	0.079751	0.582498	0.0804772	0.602505	0.0795418	0.606319	0.0778122	0.591794	0.0794098	0.605718	0.0788636	0.607948	0.0809634	0.601167	0.0799288	0.600486	0.0802129	0.619658	0.0811301	0.607844	0.0811242	0.605417	0.0831578	0.591437	0.0844223	0.631202	0.0818586
3D plot	FALSE	0.646567	0.079922	2.28117	0.205814	6.16853	0.363766	0.485151	0.0652897	0.546099	0.0716746	0.557869	0.0730249	0.568556	0.073751	0.568136	0.0747703	0.580593	0.0763892	0.573062	0.0769409	0.569985	0.0778145	0.566148	0.0783071	0.590096	0.0777196	0.596068	0.0762032	0.580523	0.0775961	0.594738	0.0771184	0.595601	0.0790964	0.58987	0.078106	0.589163	0.078378	0.607206	0.0792293	0.595952	0.0792597	0.591928	0.0811958	0.574778	0.0822879	0.619644	0.0800353
Linear	FALSE	0.642705	0.0800717	2.74425	0.231151	7.72917	0.40674	0.479327	0.0640935	0.539407	0.070244	0.551207	0.0715986	0.56156	0.0722791	0.561052	0.0732482	0.573617	0.0748914	0.565975	0.0753874	0.561461	0.0760302	0.555816	0.0762609	0.582262	0.0760758	0.589595	0.0749076	0.573412	0.0760428	0.587809	0.0756746	0.587808	0.0774297	0.582742	0.0765742	0.58202	0.0768353	0.599348	0.0775611	0.588448	0.0776312	0.583412	0.0793921	0.564248	0.0802398	0.612349	0.0785083
Data Range	AC3:AG104	0.631877	0.0808096	3.27269	0.257021	9.62957	0.451068	0.477375	0.0633111	0.537171	0.069186	0.54898	0.0705278	0.55922	0.0712048	0.558683	0.07207	0.571286	0.0737794	0.563608	0.0741807	0.558603	0.0745426	0.55234	0.0745043	0.579638	0.0747435	0.587425	0.0740303	0.571038	0.0748756	0.58549	0.074649	0.585201	0.0760983	0.580361	0.0754578	0.579634	0.0757097	0.596719	0.0762607	0.585941	0.0763705	0.580558	0.0778928	0.5607	0.078444	0.609909	0.0774014
Filled Symbols	FALSE	0.644726	0.080838	3.87571	0.283434	11.9437	0.496793	0.479455	0.0630058	0.539571	0.0685864	0.551369	0.0698993	0.561726	0.0706153	0.561223	0.0713314	0.573789	0.0731433	0.566153	0.0734184	0.561642	0.0734722	0.556002	0.0731797	0.582436	0.0738308	0.589734	0.0736425	0.573593	0.0741891	0.587971	0.0741249	0.587991	0.07521	0.582919	0.0748469	0.582199	0.0750924	0.599533	0.0754334	0.588633	0.0755798	0.583598	0.0768194	0.564423	0.0770459	0.612521	0.076804
ConcAge	FALSE	0.651816	0.0815684	4.56383	0.310403	14.7617	0.543959	0.485398	0.0632025	0.546414	0.0684938	0.558182	0.069764	0.568876	0.0705583	0.568466	0.071092	0.580923	0.0730345	0.573404	0.0731624	0.570332	0.0729058	0.566505	0.0723943	0.590429	0.0734116	0.596333	0.0737755	0.58087	0.074039	0.595049	0.0741446	0.595951	0.0748369	0.590209	0.0747913	0.589507	0.0750335	0.607561	0.0751462	0.596307	0.0753232	0.592285	0.0762588	0.575113	0.0761589	0.619974	0.0767648
ConcSwap	FALSE	0.641331	0.0816996	5.34908	0.337938	18.1931	0.592611	0.494722	0.063885	0.557144	0.0689157	0.568865	0.0701329	0.580089	0.0710385	0.579824	0.0713713	0.592111	0.0734619	0.584774	0.0734333	0.583969	0.0728892	0.582998	0.0722117	0.602971	0.0735198	0.60669	0.0744186	0.592279	0.0744375	0.606152	0.0747065	0.608437	0.0750091	0.601641	0.0752953	0.600966	0.0755377	0.620154	0.0754224	0.608341	0.0756214	0.605915	0.0762565	0.591906	0.0758547	0.631664	0.0772868
1st Symbol-row	1	0.640746	0.0819842	6.24514	0.366052	22.3716	0.642797	0.506671	0.0649983	0.570893	0.0698178	0.582553	0.0709761	0.594458	0.0720169	0.594378	0.0721467	0.606445	0.0743908	0.59934	0.0742093	0.601448	0.0734238	0.604145	0.0726469	0.619044	0.0741467	0.619964	0.0755197	0.606895	0.0753521	0.62038	0.0757652	0.624437	0.0757127	0.616288	0.0763182	0.615648	0.0765641	0.636291	0.0762397	0.62376	0.0764503	0.623385	0.0768127	0.61344	0.0761581	0.646643	0.0783277
		0.6639	0.0821006	7.26767	0.394756	27.4597	0.694563	0.520279	0.066452	0.586547	0.0711271	0.598137	0.0722252	0.610818	0.0734142	0.610948	0.0733553	0.622765	0.0757461	0.615924	0.0754275	0.621354	0.0744663	0.628232	0.0736645	0.637347	0.0752415	0.635081	0.0769896	0.623536	0.0767089	0.63658	0.0772349	0.642656	0.0768907	0.632964	0.077777	0.632363	0.0780296	0.654664	0.0775318	0.641314	0.0777427	0.643279	0.0778822	0.637972	0.0770444	0.663698	0.0798032
		0.650122	0.0821719	8.43452	0.424064	33.6556	0.747961	0.534442	0.0681283	0.602837	0.0727375	0.614356	0.0737792	0.627844	0.0751173	0.628193	0.0748993	0.639749	0.0774178	0.633182	0.0769891	0.642072	0.0759322	0.653309	0.075182	0.656397	0.0767154	0.650815	0.0787092	0.640853	0.0783979	0.653441	0.0789964	0.661616	0.0784477	0.650318	0.0795537	0.649757	0.0798156	0.673786	0.079194	0.659582	0.079394	0.663986	0.0793785	0.663513	0.0784418	0.681449	0.0815939
		0.653306	0.0831498	9.76605	0.453987	41.2004	0.803042	0.548013	0.0698916	0.618444	0.0745186	0.629894	0.075512	0.644157	0.0769882	0.644714	0.0766535	0.65602	0.0792707	0.649715	0.0787677	0.661926	0.0777028	0.677343	0.0770766	0.67465	0.0784492	0.665893	0.0805391	0.657442	0.0802822	0.669595	0.0809072	0.679782	0.0802574	0.666944	0.0815042	0.666422	0.0817772	0.692107	0.0810917	0.677083	0.0812703	0.683827	0.0811803	0.687995	0.0802372	0.698455	0.0835545
		0.650436	0.0833537	11.2855	0.484539	IsoLine	IsoLine	0.559892	0.0715989	0.632103	0.0763261	0.643493	0.0772833	0.658435	0.0788754	0.659174	0.0784758	0.67026	0.0811545	0.664185	0.0806192	0.679306	0.0796346	0.698388	0.0791947	0.690628	0.0803022	0.679092	0.0823312	0.67196	0.0822093	0.683734	0.0828123	0.695683	0.0821734	0.681495	0.0834705	0.681006	0.0837556	0.708143	0.0830711	0.692401	0.0832196	0.701195	0.0831417	0.709434	0.082285	0.713341	0.0855263
		0.672271	0.0836925	13.0194	0.515733			0.569118	0.073112	0.642708	0.0780135	0.654052	0.0789496	0.669521	0.0806258	0.670402	0.0802186	0.681317	0.0829167	0.675418	0.0823935	0.692805	0.0815711	0.714738	0.0813648	0.703037	0.0821245	0.689343	0.0839402	0.683231	0.084023	0.694714	0.0845575	0.70803	0.0840404	0.692792	0.0852933	0.692328	0.0855905	0.720594	0.0849719	0.704293	0.0850841	0.714684	0.0851037	0.726094	0.0844195	0.724899	0.0873496
		0.6856	0.0838504	14.998	0.547583			0.574942	0.0743082	0.6494	0.0794441	0.660715	0.080376	0.676517	0.0820978	0.677486	0.0817407	0.688293	0.0844144	0.682505	0.083947	0.701329	0.0833554	0.72507	0.0834111	0.710871	0.0837683	0.695815	0.0852358	0.690341	0.0855764	0.701643	0.0860014	0.715823	0.0857071	0.69992	0.086825	0.699472	0.0871332	0.728453	0.0866401	0.711796	0.0867126	0.7232	0.0869074	0.736624	0.0864675	0.732193	0.0888766
		0.67309	0.0840759	17.2559	0.580102			0.576893	0.0750906	0.651637	0.0805021	0.662941	0.0814467	0.678857	0.083172	0.679855	0.0829188	0.690624	0.0855264	0.684872	0.0851538	0.704187	0.084843	0.728545	0.0851677	0.713495	0.0851005	0.697986	0.086113	0.692715	0.0867436	0.703962	0.0870269	0.71843	0.0870385	0.702301	0.0879415	0.701858	0.0882588	0.731081	0.0879406	0.714303	0.0879733	0.726054	0.0884067	0.740171	0.0882634	0.734634	0.0899836
		0.682588	0.0844261	19.8324	0.613304
		0.696221	0.0864418	22.7725	0.647204
		0.698497	0.0866904	26.1276	0.681816
		0.713151	0.0883918	29.9562	0.717156
		0.71974	0.0886211	34.3252	0.753238
		0.725482	0.0886823	39.3108	0.790078
		0.724167	0.0889663	45	0.827692
		0.708078	0.0892893	45	0.827693
		0.732108	0.0897635	IsoLine	IsoLine
		0.713846	0.0897823
		0.713849	0.0899478
		0.730658	0.0909522
		0.756661	0.0915839
		0.740975	0.0918366
		0.733957	0.0922938
		0.774198	0.0923175
		0.751692	0.093179
		0.764235	0.0935989
		0.788006	0.0952108
		0.766791	0.0954929
		0.810336	0.0965551
		0.82344	0.0965691
		0.817465	0.0969503
		0.81387	0.097435
		0.80578	0.0978268
		0.795379	0.0982188
		0.861502	0.100656
		0.880239	0.104798
		0.898367	0.104963
		0.880683	0.106746
		0.891572	0.107272
		1.00783	0.118149
		1.10006	0.122296
		1.12164	0.125842
		1.10775	0.126918
		1.21768	0.134662
		1.28926	0.135143
		1.73568	0.174976
		1.90468	0.175132
		2.2041	0.193155
		2.79818	0.235185
		2.76139	0.224808
		2.98613	0.23226
		3.51032	0.272741
		3.5897	0.272842
		3.45676	0.259498
		3.45896	0.251545
		5.63342	0.355645
		5.67658	0.356167
		6.04179	0.364469
		6.02586	0.361566
		5.58998	0.331721
		6.58452	0.382838
		6.40383	0.370043
		6.58546	0.379713
		6.69257	0.38054
		6.89087	0.390162
		6.60581	0.373975
		6.18934	0.347352
		7.13583	0.398365
		6.60289	0.364799
		7.46424	0.411889
		7.23506	0.398286
		7.60292	0.417215
		7.57363	0.413105
		7.25311	0.394646
		7.13288	0.387942
		7.6129	0.399549
		8.25519	0.413326
		10.4865	0.445945
		11.9045	0.490618
		13.2508	0.525659
		13.9916	0.550348
		14.5599	0.549236
		15.737	0.563624
		16.3867	0.57366
		17.3447	0.606377
		17.8945	0.558489
		34.4012	0.755208
		IsoLine	IsoLine
[truncated: 162 more columns]

## Sheet: PlotDat2
Source sheet	all data	0.527134	0.0692008	0	0	0.217708	0.0315113	0.576893	0.0750906	0.651637	0.0805021	0.662941	0.0814467	0.678857	0.083172	0.679855	0.0829188	0.690624	0.0855264	0.684872	0.0851538	0.704187	0.084843	0.728545	0.0851677	0.713495	0.0851005	0.697986	0.086113	0.692715	0.0867436	0.703962	0.0870269	0.71843	0.0870385	0.702301	0.0879415	0.701858	0.0882588	0.731081	0.0879406	0.714303	0.0879733	0.726054	0.0884067	0.740171	0.0882634	0.734634	0.0899836
Plot name	Concordia0	0.594404	0.074844	0.0558399	0.00859534	0.482812	0.0640155	0.574813	0.0753958	0.649237	0.0811016	0.660552	0.0820752	0.676351	0.0837615	0.677315	0.0836575	0.688121	0.0861626	0.682327	0.085916	0.701148	0.0859134	0.724883	0.0864923	0.710697	0.0860132	0.695677	0.0865009	0.69016	0.08743	0.701481	0.0875511	0.71564	0.0879268	0.699743	0.0885523	0.699293	0.088876	0.728268	0.0887679	0.711611	0.088764	0.723014	0.0894801	0.736449	0.0896614	0.732022	0.0905809
Plot Type	1	0.605961	0.0759873	0.114798	0.0172646	0.805631	0.097544	0.56887	0.0751992	0.642394	0.0811942	0.65374	0.0822105	0.669201	0.0838185	0.670072	0.0838969	0.680986	0.0862714	0.675076	0.0861721	0.692458	0.0864798	0.714381	0.0872777	0.702704	0.0864324	0.689077	0.0863678	0.682884	0.0875801	0.694403	0.0875314	0.70768	0.0882999	0.692452	0.088608	0.691985	0.088935	0.720239	0.089055	0.703937	0.0890206	0.714327	0.0900407	0.725758	0.0905485	0.724569	0.0906201
1st free col	213	0.619039	0.0771884	0.177048	0.0260083	1.19873	0.132129	0.559547	0.0745166	0.631664	0.0807724	0.643057	0.0818416	0.657988	0.0833384	0.658714	0.0836175	0.669799	0.085844	0.663707	0.0859011	0.678821	0.0864964	0.697888	0.0874602	0.690162	0.0863242	0.678721	0.0857247	0.671475	0.0871817	0.6833	0.0869694	0.695194	0.0881277	0.681021	0.088104	0.680526	0.0884308	0.707646	0.0887788	0.691903	0.0887224	0.700697	0.090043	0.708965	0.0908526	0.712879	0.0900981
Sigma Level	2	0.619269	0.0774944	0.242774	0.0348272	1.67741	0.167804	0.547597	0.0734034	0.617915	0.0798703	0.629368	0.0809985	0.643619	0.08236	0.64416	0.0828422	0.655464	0.084915	0.64914	0.0851251	0.661342	0.0859618	0.676741	0.0870251	0.674089	0.0856973	0.665446	0.0846236	0.656858	0.0862671	0.669072	0.0859108	0.679194	0.0874241	0.666373	0.0870811	0.665844	0.0874043	0.69151	0.0879615	0.676485	0.0878935	0.683227	0.0894868	0.687431	0.0905493	0.6979	0.0890572
Absolute Errs	FALSE	0.630955	0.0796529	0.31217	0.0437219	2.2603	0.204603	0.533989	0.0719497	0.602261	0.078561	0.613784	0.0797493	0.627259	0.0809626	0.62759	0.0816336	0.639144	0.0835598	0.632556	0.083907	0.641436	0.0849193	0.652654	0.0860075	0.655786	0.0846026	0.65033	0.0831538	0.640217	0.0849103	0.652872	0.0844411	0.660976	0.0862461	0.649697	0.0856223	0.649129	0.0859388	0.673136	0.0866694	0.65893	0.0866011	0.663333	0.0884173	0.662899	0.089663	0.680845	0.0875817
Symbol Type	1	0.62424	0.0796672	0.385442	0.0526931	2.97009	0.242562	0.519827	0.0702733	0.585971	0.0769505	0.597565	0.0781954	0.610233	0.0792595	0.610345	0.0800896	0.622161	0.081888	0.615298	0.0823454	0.620718	0.0834534	0.627577	0.08449	0.636737	0.0831286	0.634595	0.0814342	0.622901	0.0832213	0.636011	0.0826795	0.642015	0.0846891	0.632343	0.0838456	0.631734	0.0841529	0.654015	0.0850072	0.640663	0.0849498	0.642626	0.086921	0.637358	0.0882655	0.663094	0.085791
Inverse Plot	FALSE	0.631395	0.0796928	0.462805	0.0617413	3.83441	0.281716	0.506256	0.06851	0.570364	0.0751694	0.582027	0.0764626	0.59392	0.0773886	0.593824	0.0783354	0.60589	0.0800352	0.598765	0.0805668	0.600864	0.0816828	0.603543	0.0825954	0.618483	0.0813949	0.619518	0.0796043	0.606312	0.0813369	0.619857	0.0807688	0.623849	0.0828793	0.615717	0.0818951	0.61507	0.0821913	0.635694	0.0831095	0.623161	0.0830735	0.622785	0.0851192	0.612876	0.0864701	0.646088	0.0838304
Color Plot	TRUE	0.640443	0.079836	0.544488	0.0708673	IsoLine	IsoLine	0.494376	0.0668027	0.556704	0.073362	0.568428	0.0746913	0.579642	0.0755015	0.579364	0.0765131	0.591649	0.0781514	0.584296	0.0787153	0.583484	0.079751	0.582498	0.0804772	0.602505	0.0795418	0.606319	0.0778122	0.591794	0.0794098	0.605718	0.0788636	0.607948	0.0809634	0.601167	0.0799288	0.600486	0.0802129	0.619658	0.0811301	0.607844	0.0811242	0.605417	0.0831578	0.591437	0.0844223	0.631202	0.0818586
3D plot	FALSE	0.646567	0.079922	0.630731	0.0800718			0.485151	0.0652897	0.546099	0.0716746	0.557869	0.0730249	0.568556	0.073751	0.568136	0.0747703	0.580593	0.0763892	0.573062	0.0769409	0.569985	0.0778145	0.566148	0.0783071	0.590096	0.0777196	0.596068	0.0762032	0.580523	0.0775961	0.594738	0.0771184	0.595601	0.0790964	0.58987	0.078106	0.589163	0.078378	0.607206	0.0792293	0.595952	0.0792597	0.591928	0.0811958	0.574778	0.0822879	0.619644	0.0800353
Linear	FALSE	0.642705	0.0800717	0.721791	0.0893554			0.479327	0.0640935	0.539407	0.070244	0.551207	0.0715986	0.56156	0.0722791	0.561052	0.0732482	0.573617	0.0748914	0.565975	0.0753874	0.561461	0.0760302	0.555816	0.0762609	0.582262	0.0760758	0.589595	0.0749076	0.573412	0.0760428	0.587809	0.0756746	0.587808	0.0774297	0.582742	0.0765742	0.58202	0.0768353	0.599348	0.0775611	0.588448	0.0776312	0.583412	0.0793921	0.564248	0.0802398	0.612349	0.0785083
Data Range	AC3:AG104	0.631877	0.0808096	0.817936	0.0987188			0.477375	0.0633111	0.537171	0.069186	0.54898	0.0705278	0.55922	0.0712048	0.558683	0.07207	0.571286	0.0737794	0.563608	0.0741807	0.558603	0.0745426	0.55234	0.0745043	0.579638	0.0747435	0.587425	0.0740303	0.571038	0.0748756	0.58549	0.074649	0.585201	0.0760983	0.580361	0.0754578	0.579634	0.0757097	0.596719	0.0762607	0.585941	0.0763705	0.580558	0.0778928	0.5607	0.078444	0.609909	0.0774014
Filled Symbols	FALSE	0.644726	0.080838	0.919449	0.108163			0.479455	0.0630058	0.539571	0.0685864	0.551369	0.0698993	0.561726	0.0706153	0.561223	0.0713314	0.573789	0.0731433	0.566153	0.0734184	0.561642	0.0734722	0.556002	0.0731797	0.582436	0.0738308	0.589734	0.0736425	0.573593	0.0741891	0.587971	0.0741249	0.587991	0.07521	0.582919	0.0748469	0.582199	0.0750924	0.599533	0.0754334	0.588633	0.0755798	0.583598	0.0768194	0.564423	0.0770459	0.612521	0.076804
ConcAge	FALSE	0.651816	0.0815684	1.02663	0.117688			0.485398	0.0632025	0.546414	0.0684938	0.558182	0.069764	0.568876	0.0705583	0.568466	0.071092	0.580923	0.0730345	0.573404	0.0731624	0.570332	0.0729058	0.566505	0.0723943	0.590429	0.0734116	0.596333	0.0737755	0.58087	0.074039	0.595049	0.0741446	0.595951	0.0748369	0.590209	0.0747913	0.589507	0.0750335	0.607561	0.0751462	0.596307	0.0753232	0.592285	0.0762588	0.575113	0.0761589	0.619974	0.0767648
ConcSwap	FALSE	0.641331	0.0816996	1.1398	0.127295			0.494722	0.063885	0.557144	0.0689157	0.568865	0.0701329	0.580089	0.0710385	0.579824	0.0713713	0.592111	0.0734619	0.584774	0.0734333	0.583969	0.0728892	0.582998	0.0722117	0.602971	0.0735198	0.60669	0.0744186	0.592279	0.0744375	0.606152	0.0747065	0.608437	0.0750091	0.601641	0.0752953	0.600966	0.0755377	0.620154	0.0754224	0.608341	0.0756214	0.605915	0.0762565	0.591906	0.0758547	0.631664	0.0772868
1st Symbol-row	1	0.640746	0.0819842	1.25928	0.136984			0.506671	0.0649983	0.570893	0.0698178	0.582553	0.0709761	0.594458	0.0720169	0.594378	0.0721467	0.606445	0.0743908	0.59934	0.0742093	0.601448	0.0734238	0.604145	0.0726469	0.619044	0.0741467	0.619964	0.0755197	0.606895	0.0753521	0.62038	0.0757652	0.624437	0.0757127	0.616288	0.0763182	0.615648	0.0765641	0.636291	0.0762397	0.62376	0.0764503	0.623385	0.0768127	0.61344	0.0761581	0.646643	0.0783277
		0.6639	0.0821006	1.38544	0.146757			0.520279	0.066452	0.586547	0.0711271	0.598137	0.0722252	0.610818	0.0734142	0.610948	0.0733553	0.622765	0.0757461	0.615924	0.0754275	0.621354	0.0744663	0.628232	0.0736645	0.637347	0.0752415	0.635081	0.0769896	0.623536	0.0767089	0.63658	0.0772349	0.642656	0.0768907	0.632964	0.077777	0.632363	0.0780296	0.654664	0.0775318	0.641314	0.0777427	0.643279	0.0778822	0.637972	0.0770444	0.663698	0.0798032
		0.650122	0.0821719	1.51864	0.156614			0.534442	0.0681283	0.602837	0.0727375	0.614356	0.0737792	0.627844	0.0751173	0.628193	0.0748993	0.639749	0.0774178	0.633182	0.0769891	0.642072	0.0759322	0.653309	0.075182	0.656397	0.0767154	0.650815	0.0787092	0.640853	0.0783979	0.653441	0.0789964	0.661616	0.0784477	0.650318	0.0795537	0.649757	0.0798156	0.673786	0.079194	0.659582	0.079394	0.663986	0.0793785	0.663513	0.0784418	0.681449	0.0815939
		0.653306	0.0831498	1.65929	0.166555			0.548013	0.0698916	0.618444	0.0745186	0.629894	0.075512	0.644157	0.0769882	0.644714	0.0766535	0.65602	0.0792707	0.649715	0.0787677	0.661926	0.0777028	0.677343	0.0770766	0.67465	0.0784492	0.665893	0.0805391	0.657442	0.0802822	0.669595	0.0809072	0.679782	0.0802574	0.666944	0.0815042	0.666422	0.0817772	0.692107	0.0810917	0.677083	0.0812703	0.683827	0.0811803	0.687995	0.0802372	0.698455	0.0835545
		0.650436	0.0833537	1.80778	0.176582			0.559892	0.0715989	0.632103	0.0763261	0.643493	0.0772833	0.658435	0.0788754	0.659174	0.0784758	0.67026	0.0811545	0.664185	0.0806192	0.679306	0.0796346	0.698388	0.0791947	0.690628	0.0803022	0.679092	0.0823312	0.67196	0.0822093	0.683734	0.0828123	0.695683	0.0821734	0.681495	0.0834705	0.681006	0.0837556	0.708143	0.0830711	0.692401	0.0832196	0.701195	0.0831417	0.709434	0.082285	0.713341	0.0855263
		0.672271	0.0836925	1.96457	0.186695			0.569118	0.073112	0.642708	0.0780135	0.654052	0.0789496	0.669521	0.0806258	0.670402	0.0802186	0.681317	0.0829167	0.675418	0.0823935	0.692805	0.0815711	0.714738	0.0813648	0.703037	0.0821245	0.689343	0.0839402	0.683231	0.084023	0.694714	0.0845575	0.70803	0.0840404	0.692792	0.0852933	0.692328	0.0855905	0.720594	0.0849719	0.704293	0.0850841	0.714684	0.0851037	0.726094	0.0844195	0.724899	0.0873496
		0.6856	0.0838504	2.13011	0.196895			0.574942	0.0743082	0.6494	0.0794441	0.660715	0.080376	0.676517	0.0820978	0.677486	0.0817407	0.688293	0.0844144	0.682505	0.083947	0.701329	0.0833554	0.72507	0.0834111	0.710871	0.0837683	0.695815	0.0852358	0.690341	0.0855764	0.701643	0.0860014	0.715823	0.0857071	0.69992	0.086825	0.699472	0.0871332	0.728453	0.0866401	0.711796	0.0867126	0.7232	0.0869074	0.736624	0.0864675	0.732193	0.0888766
		0.67309	0.0840759	2.30489	0.207183			0.576893	0.0750906	0.651637	0.0805021	0.662941	0.0814467	0.678857	0.083172	0.679855	0.0829188	0.690624	0.0855264	0.684872	0.0851538	0.704187	0.084843	0.728545	0.0851677	0.713495	0.0851005	0.697986	0.086113	0.692715	0.0867436	0.703962	0.0870269	0.71843	0.0870385	0.702301	0.0879415	0.701858	0.0882588	0.731081	0.0879406	0.714303	0.0879733	0.726054	0.0884067	0.740171	0.0882634	0.734634	0.0899836
		0.682588	0.0844261	2.48944	0.217559
		0.696221	0.0864418	2.68428	0.228024
		0.698497	0.0866904	2.89001	0.23858
		0.713151	0.0883918	3.10723	0.249226
		0.71974	0.0886211	3.33658	0.259963
		0.725482	0.0886823	3.57873	0.270793
		0.724167	0.0889663	3.83441	0.281716
		0.708078	0.0892893	4	0.288474
		0.732108	0.0897635	IsoLine	IsoLine
		0.713846	0.0897823
		0.713849	0.0899478
		0.730658	0.0909522
		0.756661	0.0915839
		0.740975	0.0918366
		0.733957	0.0922938
		0.774198	0.0923175
		0.751692	0.093179
		0.764235	0.0935989
		0.788006	0.0952108
		0.766791	0.0954929
		0.810336	0.0965551
		0.82344	0.0965691
		0.817465	0.0969503
		0.81387	0.097435
		0.80578	0.0978268
		0.795379	0.0982188
		0.861502	0.100656
		0.880239	0.104798
		0.898367	0.104963
		0.880683	0.106746
		0.891572	0.107272
		1.00783	0.118149
		1.10006	0.122296
		1.12164	0.125842
		1.10775	0.126918
		1.21768	0.134662
		1.28926	0.135143
		1.73568	0.174976
		1.90468	0.175132
		2.2041	0.193155
		2.79818	0.235185
		2.76139	0.224808
		2.98613	0.23226
		3.51032	0.272741
		3.5897	0.272842
		3.45676	0.259498
		3.45896	0.251545
		5.63342	0.355645
		5.67658	0.356167
		6.04179	0.364469
		6.02586	0.361566
		5.58998	0.331721
		6.58452	0.382838
		6.40383	0.370043
		6.58546	0.379713
		6.69257	0.38054
		6.89087	0.390162
		6.60581	0.373975
		6.18934	0.347352
		7.13583	0.398365
		6.60289	0.364799
		7.46424	0.411889
		7.23506	0.398286
		7.60292	0.417215
		7.57363	0.413105
		7.25311	0.394646
		7.13288	0.387942
		7.6129	0.399549
		8.25519	0.413326
		10.4865	0.445945
		11.9045	0.490618
		13.2508	0.525659
		13.9916	0.550348
		14.5599	0.549236
		15.737	0.563624
		16.3867	0.57366
		17.3447	0.606377
		17.8945	0.558489
		34.4012	0.755208
		IsoLine	IsoLine
[truncated: 162 more columns]

## Sheet: PlotDat3
Source sheet	all data	0.527134	0.0692008	0	0	0.103498	0.0156334	0.576893	0.0750906	0.651637	0.0805021	0.662941	0.0814467	0.678857	0.083172	0.679855	0.0829188	0.690624	0.0855264	0.684872	0.0851538	0.704187	0.084843	0.728545	0.0851677	0.713495	0.0851005	0.697986	0.086113	0.692715	0.0867436	0.703962	0.0870269	0.71843	0.0870385	0.702301	0.0879415	0.701858	0.0882588	0.731081	0.0879406	0.714303	0.0879733	0.726054	0.0884067	0.740171	0.0882634	0.734634	0.0899836
Plot name	Concordia0	0.594404	0.074844	0.0345435	0.00536346	0.217708	0.0315113	0.574813	0.0753958	0.649237	0.0811016	0.660552	0.0820752	0.676351	0.0837615	0.677315	0.0836575	0.688121	0.0861626	0.682327	0.085916	0.702529	0.0856743	0.726551	0.0861881	0.711968	0.0858157	0.695677	0.0865009	0.69016	0.08743	0.701481	0.0875511	0.716907	0.087738	0.699743	0.0885523	0.699293	0.088876	0.729545	0.088598	0.712833	0.0886035	0.724396	0.0892411	0.738146	0.0893346	0.732022	0.0905809
Plot Type	1	0.605961	0.0759873	0.0702803	0.0107557	0.343738	0.0476374	0.56887	0.0751992	0.642394	0.0811942	0.65374	0.0822105	0.669201	0.0838185	0.670072	0.0838969	0.680986	0.0862714	0.675076	0.0861721	0.697763	0.0862442	0.720794	0.0869309	0.707583	0.0862733	0.689077	0.0863678	0.682884	0.0875801	0.694403	0.0875314	0.712539	0.0881678	0.692452	0.088608	0.691985	0.088935	0.72514	0.0889716	0.708621	0.0889525	0.719631	0.0898093	0.732287	0.0901444	0.724569	0.0906201
1st free col	213	0.619039	0.0771884	0.107252	0.0161768	0.482812	0.0640155	0.559547	0.0745166	0.631664	0.0807724	0.643057	0.0818416	0.657988	0.0833384	0.658714	0.0836175	0.669799	0.085844	0.663707	0.0859011	0.690096	0.0865278	0.711525	0.0873636	0.700532	0.0864533	0.678721	0.0857247	0.671475	0.0871817	0.6833	0.0869694	0.705518	0.0883093	0.681021	0.088104	0.680526	0.0884308	0.718058	0.0890448	0.701853	0.0890052	0.711967	0.0900865	0.722851	0.0906574	0.712879	0.0900981
Sigma Level	2	0.619269	0.0774944	0.1455	0.0216271	0.636279	0.0806498	0.547597	0.0734034	0.617915	0.0798703	0.629368	0.0809985	0.643619	0.08236	0.64416	0.0828422	0.655464	0.084915	0.64914	0.0851251	0.679864	0.0865126	0.699149	0.0874674	0.691121	0.0863479	0.665446	0.0846236	0.656858	0.0862671	0.669072	0.0859108	0.696149	0.0881561	0.666373	0.0870811	0.665844	0.0874043	0.708609	0.0888145	0.692823	0.0887593	0.701739	0.0900604	0.71025	0.0908512	0.6979	0.0890572
Absolute Errs	FALSE	0.630955	0.0796529	0.18507	0.0271065	0.805631	0.097544	0.533989	0.0719497	0.602261	0.078561	0.613784	0.0797493	0.627259	0.0809626	0.62759	0.0816336	0.639144	0.0835598	0.632556	0.083907	0.667513	0.0861994	0.684208	0.0872376	0.679764	0.0859616	0.65033	0.0831538	0.640217	0.0849103	0.652872	0.0844411	0.684843	0.087715	0.649697	0.0856223	0.649129	0.0859388	0.697207	0.0882908	0.681928	0.0882255	0.689394	0.0897324	0.695035	0.0907174	0.680845	0.0875817
Symbol Type	1	0.62424	0.0796672	0.226006	0.0326154	0.99251	0.114702	0.519827	0.0702733	0.585971	0.0769505	0.597565	0.0781954	0.610233	0.0792595	0.610345	0.0800896	0.622161	0.081888	0.615298	0.0823454	0.653583	0.0856018	0.667353	0.0866843	0.666955	0.0853114	0.634595	0.0814342	0.622901	0.0832213	0.636011	0.0826795	0.672093	0.0870052	0.632343	0.0838456	0.631734	0.0841529	0.684348	0.0874966	0.669642	0.0874271	0.675473	0.0891166	0.67787	0.0902617	0.663094	0.085791
Inverse Plot	FALSE	0.631395	0.0796928	0.268357	0.0381538	1.19873	0.132129	0.506256	0.06851	0.570364	0.0751694	0.582027	0.0764626	0.59392	0.0773886	0.593824	0.0783354	0.60589	0.0800352	0.598765	0.0805668	0.638684	0.084746	0.649323	0.0858317	0.653256	0.0844256	0.619518	0.0796043	0.606312	0.0813369	0.619857	0.0807688	0.658457	0.0860579	0.615717	0.0818951	0.61507	0.0821913	0.670596	0.0864665	0.656504	0.086399	0.660582	0.0882401	0.659507	0.0895041	0.646088	0.0838304
Color Plot	TRUE	0.640443	0.079836	0.31217	0.0437219	1.42629	0.149828	0.494376	0.0668027	0.556704	0.073362	0.568428	0.0746913	0.579642	0.0755015	0.579364	0.0765131	0.591649	0.0781514	0.584296	0.0787153	0.623467	0.0836693	0.630905	0.0847171	0.639264	0.083343	0.606319	0.0778122	0.591794	0.0794098	0.605718	0.0788636	0.644531	0.0849143	0.601167	0.0799288	0.600486	0.0802129	0.656552	0.0852456	0.643086	0.0851862	0.645374	0.0871411	0.640747	0.0884777	0.631202	0.0818586
3D plot	FALSE	0.646567	0.079922	0.357497	0.0493199	1.67741	0.167804	0.485151	0.0652897	0.546099	0.0716746	0.557869	0.0730249	0.568556	0.073751	0.568136	0.0747703	0.580593	0.0763892	0.573062	0.0769409	0.608596	0.0824188	0.612903	0.0833892	0.625591	0.0821109	0.596068	0.0762032	0.580523	0.0775961	0.594738	0.0771184	0.630923	0.0836245	0.58987	0.078106	0.589163	0.078378	0.642828	0.0838873	0.629976	0.0838416	0.630512	0.0858677	0.622411	0.0872273	0.619644	0.0800353
Linear	FALSE	0.642705	0.0800717	0.40439	0.0549478	IsoLine	IsoLine	0.479327	0.0640935	0.539407	0.070244	0.551207	0.0715986	0.56156	0.0722791	0.561052	0.0732482	0.573617	0.0748914	0.565975	0.0753874	0.594721	0.0810492	0.596105	0.0819059	0.612835	0.0807831	0.589595	0.0749076	0.573412	0.0760428	0.587809	0.0756746	0.618228	0.0822449	0.582742	0.0765742	0.58202	0.0768353	0.630025	0.0824509	0.617747	0.0824241	0.616646	0.0844754	0.605299	0.0858077	0.612349	0.0785083
Data Range	AC3:AG104	0.631877	0.0808096	0.452903	0.060606			0.477375	0.0633111	0.537171	0.069186	0.54898	0.0705278	0.55922	0.0712048	0.558683	0.07207	0.571286	0.0737794	0.563608	0.0741807	0.582449	0.0796203	0.581245	0.0803322	0.601554	0.0794177	0.587425	0.0740303	0.571038	0.0748756	0.58549	0.074649	0.607001	0.0808356	0.580361	0.0754578	0.579634	0.0757097	0.618703	0.0809992	0.606932	0.0809955	0.604383	0.0830253	0.59016	0.0842808	0.609909	0.0774014
Filled Symbols	FALSE	0.644726	0.080838	0.503091	0.0662945			0.479455	0.0630058	0.539571	0.0685864	0.551369	0.0698993	0.561726	0.0706153	0.561223	0.0713314	0.573789	0.0731433	0.566153	0.0734184	0.572316	0.0781946	0.568972	0.0787368	0.592239	0.0780743	0.589734	0.0736425	0.573593	0.0741891	0.587971	0.0741249	0.597733	0.0794584	0.582919	0.0748469	0.582199	0.0750924	0.609357	0.0795956	0.598005	0.0796184	0.594257	0.0815805	0.577656	0.0827134	0.612521	0.076804
ConcAge	FALSE	0.651816	0.0815684	0.555013	0.0720136			0.485398	0.0632025	0.546414	0.0684938	0.558182	0.069764	0.568876	0.0705583	0.568466	0.071092	0.580923	0.0730345	0.573404	0.0731624	0.564766	0.0768343	0.559823	0.0771895	0.585299	0.0768117	0.596333	0.0737755	0.58087	0.074039	0.595049	0.0741446	0.590829	0.0781734	0.590209	0.0747913	0.589507	0.0750335	0.602394	0.0783015	0.591356	0.0783528	0.586713	0.0802044	0.568332	0.0811739	0.619974	0.0767648
ConcSwap	FALSE	0.641331	0.0816996	0.608729	0.0777633			0.494722	0.063885	0.557144	0.0689157	0.568865	0.0701329	0.580089	0.0710385	0.579824	0.0713713	0.592111	0.0734619	0.584774	0.0734333	0.560127	0.075599	0.554197	0.0757578	0.581037	0.075685	0.60669	0.0744186	0.592279	0.0744375	0.606152	0.0747065	0.58659	0.0770368	0.601641	0.0752953	0.600966	0.0755377	0.598119	0.0771734	0.587275	0.0772542	0.582079	0.078957	0.562597	0.0797298	0.631664	0.0772868
1st Symbol-row	1	0.640746	0.0819842	0.6643	0.0835438			0.506671	0.0649983	0.570893	0.0698178	0.582553	0.0709761	0.594458	0.0720169	0.594378	0.0721467	0.606445	0.0743908	0.59934	0.0742093	0.558603	0.0745426	0.55234	0.0745043	0.579638	0.0747435	0.619964	0.0755197	0.606895	0.0753521	0.62038	0.0757652	0.585201	0.0760983	0.616288	0.0763182	0.615648	0.0765641	0.596719	0.0762607	0.585941	0.0763705	0.580558	0.0778928	0.5607	0.078444	0.646643	0.0783277
		0.6639	0.0821006	0.721791	0.0893554			0.520279	0.066452	0.586547	0.0711271	0.598137	0.0722252	0.610818	0.0734142	0.610948	0.0733553	0.622765	0.0757461	0.615924	0.0754275	0.560261	0.0737112	0.554335	0.0734839	0.581165	0.0740284	0.635081	0.0769896	0.623536	0.0767089	0.63658	0.0772349	0.586724	0.0753988	0.632964	0.077777	0.632363	0.0780296	0.598256	0.0756032	0.587412	0.0757403	0.582216	0.0770584	0.562726	0.0773728	0.663698	0.0798032
		0.650122	0.0821719	0.781268	0.0951981			0.534442	0.0681283	0.602837	0.0727375	0.614356	0.0737792	0.627844	0.0751173	0.628193	0.0748993	0.639749	0.0774178	0.633182	0.0769891	0.565027	0.0731413	0.560092	0.0727411	0.58555	0.0735708	0.650815	0.0787092	0.640853	0.0783979	0.653441	0.0789964	0.591092	0.0749689	0.650318	0.0795537	0.649757	0.0798156	0.602661	0.0752297	0.591624	0.0753913	0.586981	0.0764902	0.568584	0.0765629	0.681449	0.0815939
		0.653306	0.0831498	0.842799	0.101072			0.548013	0.0698916	0.618444	0.0745186	0.629894	0.075512	0.644157	0.0769882	0.644714	0.0766535	0.65602	0.0792707	0.649715	0.0787677	0.572694	0.0728578	0.569361	0.0723083	0.592602	0.0733907	0.665893	0.0805391	0.657442	0.0802822	0.669595	0.0809072	0.598113	0.0748275	0.666944	0.0815042	0.666422	0.0817772	0.609743	0.0751564	0.598392	0.0753385	0.594645	0.076213	0.57802	0.0760499	0.698455	0.0835545
		0.650436	0.0833537	0.906456	0.106978			0.559892	0.0715989	0.632103	0.0763261	0.643493	0.0772833	0.658435	0.0788754	0.659174	0.0784758	0.67026	0.0811545	0.664185	0.0806192	0.582927	0.0728729	0.581737	0.0722046	0.602012	0.0734962	0.679092	0.0823312	0.67196	0.0822093	0.683734	0.0828123	0.607482	0.0749807	0.681495	0.0834705	0.681006	0.0837556	0.619191	0.0753867	0.607421	0.0755845	0.604873	0.0762391	0.590621	0.0758561	0.713341	0.0855263
		0.672271	0.0836925	0.972312	0.112915			0.569118	0.073112	0.642708	0.0780135	0.654052	0.0789496	0.669521	0.0806258	0.670402	0.0802186	0.681317	0.0829167	0.675418	0.0823935	0.595277	0.0731862	0.596678	0.0724344	0.613369	0.0738824	0.689343	0.0839402	0.683231	0.084023	0.694714	0.0845575	0.618788	0.0754218	0.692792	0.0852933	0.692328	0.0855905	0.630594	0.0759104	0.618317	0.0761183	0.617218	0.0765671	0.605837	0.0759899	0.724899	0.0873496
		0.6856	0.0838504	1.04044	0.118884			0.574942	0.0743082	0.6494	0.0794441	0.660715	0.080376	0.676517	0.0820978	0.677486	0.0817407	0.688293	0.0844144	0.682505	0.083947	0.609207	0.0737837	0.613533	0.0729876	0.626178	0.0745327	0.695815	0.0852358	0.690341	0.0855764	0.701643	0.0860014	0.631538	0.0761315	0.69992	0.086825	0.699472	0.0871332	0.643452	0.0767046	0.630602	0.0769167	0.631139	0.0771829	0.623001	0.0764456	0.732193	0.0888766
		0.67309	0.0840759	1.11093	0.124885			0.576893	0.0750906	0.651637	0.0805021	0.662941	0.0814467	0.678857	0.083172	0.679855	0.0829188	0.690624	0.0855264	0.684872	0.0851538	0.624106	0.0746396	0.631563	0.0738402	0.639877	0.0754184	0.697986	0.086113	0.692715	0.0867436	0.703962	0.0870269	0.645174	0.0770789	0.702301	0.0879415	0.701858	0.0882588	0.657204	0.0777347	0.643741	0.0779448	0.64603	0.0780594	0.641364	0.0772032	0.734634	0.0899836
		0.682588	0.0844261	1.18385	0.130918																	0.639323	0.0757163	0.649981	0.0749548	0.653869	0.076501							0.6591	0.0782225					0.671249	0.0789556	0.657158	0.0791576	0.661238	0.0791584	0.660124	0.0782296
		0.696221	0.0864418	1.25928	0.136984																	0.654194	0.0769668	0.667983	0.0762828	0.667542	0.0777332							0.672708	0.0795122					0.684973	0.0803139	0.670268	0.0805022	0.6761	0.0804319	0.67846	0.07948
		0.698497	0.0866904	1.33733	0.143082																	0.668069	0.0783364	0.684781	0.077766	0.680298	0.0790609							0.685403	0.0808919					0.697775	0.0817503	0.682498	0.0819197	0.689966	0.0818241	0.695572	0.0808996
		0.713151	0.0883918	1.41807	0.149213																	0.680341	0.0797653	0.699641	0.0793397	0.69158	0.0804263							0.69663	0.0823011					0.709097	0.0832021	0.693312	0.0833483	0.702229	0.0832743	0.710711	0.0824265
		0.71974	0.0886211	1.50159	0.155377																	0.690474	0.081191	0.711914	0.0809351	0.700894	0.0817697							0.705898	0.0836783					0.718444	0.0846057	0.702239	0.0847254	0.712354	0.084719	0.723215	0.083994
		0.725482	0.0886823	1.58801	0.161574																	0.698024	0.0825513	0.721063	0.0824825	0.707834	0.0830323							0.712802	0.0849633					0.725407	0.0858998	0.708889	0.085991	0.719899	0.0860951	0.732539	0.0855334
		0.724167	0.0889663	1.67741	0.167804																	0.702663	0.0837866	0.726689	0.0839142	0.712097	0.084159							0.717042	0.0860999					0.729682	0.0870278	0.712969	0.0870896	0.724533	0.0873425	0.738275	0.0869776
		0.708078	0.0892893	1.76989	0.174067																	0.704187	0.084843	0.728545	0.0851677	0.713495	0.0851005							0.71843	0.0870385					0.731081	0.0879406	0.714303	0.0879733	0.726054	0.0884067	0.740171	0.0882634
		0.732108	0.0897635	1.8	0.176049
		0.713846	0.0897823	IsoLine	IsoLine
		0.713849	0.0899478
		0.730658	0.0909522
		0.756661	0.0915839
		0.740975	0.0918366
		0.733957	0.0922938
		0.774198	0.0923175
		0.751692	0.093179
		0.764235	0.0935989
		0.788006	0.0952108
		0.766791	0.0954929
		0.810336	0.0965551
		0.82344	0.0965691
		0.817465	0.0969503
		0.81387	0.097435
		0.80578	0.0978268
		0.795379	0.0982188
		0.861502	0.100656
		0.880239	0.104798
		0.898367	0.104963
		0.880683	0.106746
		0.891572	0.107272
		1.00783	0.118149
		1.10006	0.122296
		1.12164	0.125842
		1.10775	0.126918
		1.21768	0.134662
		1.28926	0.135143
		1.73568	0.174976
		1.90468	0.175132
		2.2041	0.193155
		2.79818	0.235185
		2.76139	0.224808
		2.98613	0.23226
		3.51032	0.272741
		3.5897	0.272842
		3.45676	0.259498
		3.45896	0.251545
		5.63342	0.355645
		5.67658	0.356167
		6.04179	0.364469
		6.02586	0.361566
		5.58998	0.331721
		6.58452	0.382838
		6.40383	0.370043
		6.58546	0.379713
		6.69257	0.38054
		6.89087	0.390162
		6.60581	0.373975
		6.18934	0.347352
		7.13583	0.398365
		6.60289	0.364799
		7.46424	0.411889
		7.23506	0.398286
		7.60292	0.417215
		7.57363	0.413105
		7.25311	0.394646
		7.13288	0.387942
		7.6129	0.399549
		8.25519	0.413326
		10.4865	0.445945
		11.9045	0.490618
		13.2508	0.525659
		13.9916	0.550348
		14.5599	0.549236
		15.737	0.563624
		16.3867	0.57366
		17.3447	0.606377
		17.8945	0.558489
		34.4012	0.755208
		IsoLine	IsoLine
[truncated: 162 more columns]

## Sheet: PlotDat4
Source sheet	all data	0.527134	0.0692008	0	0	0.217708	0.0315113	0.576893	0.0750906	0.651637	0.0805021	0.662941	0.0814467	0.678857	0.083172	0.679855	0.0829188	0.690624	0.0855264	0.684872	0.0851538	0.704187	0.084843	0.728545	0.0851677	0.713495	0.0851005	0.697986	0.086113	0.692715	0.0867436	0.703962	0.0870269	0.71843	0.0870385	0.702301	0.0879415	0.701858	0.0882588	0.731081	0.0879406	0.714303	0.0879733	0.726054	0.0884067	0.740171	0.0882634	0.734634	0.0899836
Plot name	Concordia0	0.594404	0.074844	0.141134	0.0210127	0.482812	0.0640155	0.574813	0.0753958	0.649237	0.0811016	0.660552	0.0820752	0.676351	0.0837615	0.677315	0.0836575	0.688121	0.0861626	0.682327	0.085916	0.701148	0.0859134	0.724883	0.0864923	0.710697	0.0860132	0.695677	0.0865009	0.69016	0.08743	0.701481	0.0875511	0.71564	0.0879268	0.699743	0.0885523	0.699293	0.088876	0.728268	0.0887679	0.711611	0.088764	0.723014	0.0894801	0.736449	0.0896614	0.732022	0.0905809
Plot Type	1	0.605961	0.0759873	0.302186	0.0424669	0.805631	0.097544	0.56887	0.0751992	0.642394	0.0811942	0.65374	0.0822105	0.669201	0.0838185	0.670072	0.0838969	0.680986	0.0862714	0.675076	0.0861721	0.692458	0.0864798	0.714381	0.0872777	0.702704	0.0864324	0.689077	0.0863678	0.682884	0.0875801	0.694403	0.0875314	0.70768	0.0882999	0.692452	0.088608	0.691985	0.088935	0.720239	0.089055	0.703937	0.0890206	0.714327	0.0900407	0.725758	0.0905485	0.724569	0.0906201
1st free col	213	0.619039	0.0771884	0.485968	0.064372	1.19873	0.132129	0.559547	0.0745166	0.631664	0.0807724	0.643057	0.0818416	0.657988	0.0833384	0.658714	0.0836175	0.669799	0.085844	0.663707	0.0859011	0.678821	0.0864964	0.697888	0.0874602	0.690162	0.0863242	0.678721	0.0857247	0.671475	0.0871817	0.6833	0.0869694	0.695194	0.0881277	0.681021	0.088104	0.680526	0.0884308	0.707646	0.0887788	0.691903	0.0887224	0.700697	0.090043	0.708965	0.0908526	0.712879	0.0900981
Sigma Level	2	0.619269	0.0774944	0.695688	0.0867373	1.67741	0.167804	0.547597	0.0734034	0.617915	0.0798703	0.629368	0.0809985	0.643619	0.08236	0.64416	0.0828422	0.655464	0.084915	0.64914	0.0851251	0.661342	0.0859618	0.676741	0.0870251	0.674089	0.0856973	0.665446	0.0846236	0.656858	0.0862671	0.669072	0.0859108	0.679194	0.0874241	0.666373	0.0870811	0.665844	0.0874043	0.69151	0.0879615	0.676485	0.0878935	0.683227	0.0894868	0.687431	0.0905493	0.6979	0.0890572
Absolute Errs	FALSE	0.630955	0.0796529	0.935006	0.109573	2.2603	0.204603	0.533989	0.0719497	0.602261	0.078561	0.613784	0.0797493	0.627259	0.0809626	0.62759	0.0816336	0.639144	0.0835598	0.632556	0.083907	0.641436	0.0849193	0.652654	0.0860075	0.655786	0.0846026	0.65033	0.0831538	0.640217	0.0849103	0.652872	0.0844411	0.660976	0.0862461	0.649697	0.0856223	0.649129	0.0859388	0.673136	0.0866694	0.65893	0.0866011	0.663333	0.0884173	0.662899	0.089663	0.680845	0.0875817
Symbol Type	1	0.62424	0.0796672	1.2081	0.132888	2.97009	0.242562	0.519827	0.0702733	0.585971	0.0769505	0.597565	0.0781954	0.610233	0.0792595	0.610345	0.0800896	0.622161	0.081888	0.615298	0.0823454	0.620718	0.0834534	0.627577	0.08449	0.636737	0.0831286	0.634595	0.0814342	0.622901	0.0832213	0.636011	0.0826795	0.642015	0.0846891	0.632343	0.0838456	0.631734	0.0841529	0.654015	0.0850072	0.640663	0.0849498	0.642626	0.086921	0.637358	0.0882655	0.663094	0.085791
Inverse Plot	FALSE	0.631395	0.0796928	1.51974	0.156693	3.83441	0.281716	0.506256	0.06851	0.570364	0.0751694	0.582027	0.0764626	0.59392	0.0773886	0.593824	0.0783354	0.60589	0.0800352	0.598765	0.0805668	0.600864	0.0816828	0.603543	0.0825954	0.618483	0.0813949	0.619518	0.0796043	0.606312	0.0813369	0.619857	0.0807688	0.623849	0.0828793	0.615717	0.0818951	0.61507	0.0821913	0.635694	0.0831095	0.623161	0.0830735	0.622785	0.0851192	0.612876	0.0864701	0.646088	0.0838304
Color Plot	FALSE	0.640443	0.079836	1.87536	0.180998	4.8869	0.322105	0.494376	0.0668027	0.556704	0.073362	0.568428	0.0746913	0.579642	0.0755015	0.579364	0.0765131	0.591649	0.0781514	0.584296	0.0787153	0.583484	0.079751	0.582498	0.0804772	0.602505	0.0795418	0.606319	0.0778122	0.591794	0.0794098	0.605718	0.0788636	0.607948	0.0809634	0.601167	0.0799288	0.600486	0.0802129	0.619658	0.0811301	0.607844	0.0811242	0.605417	0.0831578	0.591437	0.0844223	0.631202	0.0818586
3D plot	FALSE	0.646567	0.079922	2.28117	0.205814	6.16853	0.363766	0.485151	0.0652897	0.546099	0.0716746	0.557869	0.0730249	0.568556	0.073751	0.568136	0.0747703	0.580593	0.0763892	0.573062	0.0769409	0.569985	0.0778145	0.566148	0.0783071	0.590096	0.0777196	0.596068	0.0762032	0.580523	0.0775961	0.594738	0.0771184	0.595601	0.0790964	0.58987	0.078106	0.589163	0.078378	0.607206	0.0792293	0.595952	0.0792597	0.591928	0.0811958	0.574778	0.0822879	0.619644	0.0800353
Linear	FALSE	0.642705	0.0800717	2.74425	0.231151	7.72917	0.40674	0.479327	0.0640935	0.539407	0.070244	0.551207	0.0715986	0.56156	0.0722791	0.561052	0.0732482	0.573617	0.0748914	0.565975	0.0753874	0.561461	0.0760302	0.555816	0.0762609	0.582262	0.0760758	0.589595	0.0749076	0.573412	0.0760428	0.587809	0.0756746	0.587808	0.0774297	0.582742	0.0765742	0.58202	0.0768353	0.599348	0.0775611	0.588448	0.0776312	0.583412	0.0793921	0.564248	0.0802398	0.612349	0.0785083
Data Range	AC3:AG104	0.631877	0.0808096	3.27269	0.257021	9.62957	0.451068	0.477375	0.0633111	0.537171	0.069186	0.54898	0.0705278	0.55922	0.0712048	0.558683	0.07207	0.571286	0.0737794	0.563608	0.0741807	0.558603	0.0745426	0.55234	0.0745043	0.579638	0.0747435	0.587425	0.0740303	0.571038	0.0748756	0.58549	0.074649	0.585201	0.0760983	0.580361	0.0754578	0.579634	0.0757097	0.596719	0.0762607	0.585941	0.0763705	0.580558	0.0778928	0.5607	0.078444	0.609909	0.0774014
Filled Symbols	FALSE	0.644726	0.080838	3.87571	0.283434	11.9437	0.496793	0.479455	0.0630058	0.539571	0.0685864	0.551369	0.0698993	0.561726	0.0706153	0.561223	0.0713314	0.573789	0.0731433	0.566153	0.0734184	0.561642	0.0734722	0.556002	0.0731797	0.582436	0.0738308	0.589734	0.0736425	0.573593	0.0741891	0.587971	0.0741249	0.587991	0.07521	0.582919	0.0748469	0.582199	0.0750924	0.599533	0.0754334	0.588633	0.0755798	0.583598	0.0768194	0.564423	0.0770459	0.612521	0.076804
ConcAge	FALSE	0.651816	0.0815684	4.56383	0.310403	14.7617	0.543959	0.485398	0.0632025	0.546414	0.0684938	0.558182	0.069764	0.568876	0.0705583	0.568466	0.071092	0.580923	0.0730345	0.573404	0.0731624	0.570332	0.0729058	0.566505	0.0723943	0.590429	0.0734116	0.596333	0.0737755	0.58087	0.074039	0.595049	0.0741446	0.595951	0.0748369	0.590209	0.0747913	0.589507	0.0750335	0.607561	0.0751462	0.596307	0.0753232	0.592285	0.0762588	0.575113	0.0761589	0.619974	0.0767648
ConcSwap	FALSE	0.641331	0.0816996	5.34908	0.337938	18.1931	0.592611	0.494722	0.063885	0.557144	0.0689157	0.568865	0.0701329	0.580089	0.0710385	0.579824	0.0713713	0.592111	0.0734619	0.584774	0.0734333	0.583969	0.0728892	0.582998	0.0722117	0.602971	0.0735198	0.60669	0.0744186	0.592279	0.0744375	0.606152	0.0747065	0.608437	0.0750091	0.601641	0.0752953	0.600966	0.0755377	0.620154	0.0754224	0.608341	0.0756214	0.605915	0.0762565	0.591906	0.0758547	0.631664	0.0772868
1st Symbol-row	1	0.640746	0.0819842	6.24514	0.366052	22.3716	0.642797	0.506671	0.0649983	0.570893	0.0698178	0.582553	0.0709761	0.594458	0.0720169	0.594378	0.0721467	0.606445	0.0743908	0.59934	0.0742093	0.601448	0.0734238	0.604145	0.0726469	0.619044	0.0741467	0.619964	0.0755197	0.606895	0.0753521	0.62038	0.0757652	0.624437	0.0757127	0.616288	0.0763182	0.615648	0.0765641	0.636291	0.0762397	0.62376	0.0764503	0.623385	0.0768127	0.61344	0.0761581	0.646643	0.0783277
		0.6639	0.0821006	7.26767	0.394756	27.4597	0.694563	0.520279	0.066452	0.586547	0.0711271	0.598137	0.0722252	0.610818	0.0734142	0.610948	0.0733553	0.622765	0.0757461	0.615924	0.0754275	0.621354	0.0744663	0.628232	0.0736645	0.637347	0.0752415	0.635081	0.0769896	0.623536	0.0767089	0.63658	0.0772349	0.642656	0.0768907	0.632964	0.077777	0.632363	0.0780296	0.654664	0.0775318	0.641314	0.0777427	0.643279	0.0778822	0.637972	0.0770444	0.663698	0.0798032
		0.650122	0.0821719	8.43452	0.424064	33.6556	0.747961	0.534442	0.0681283	0.602837	0.0727375	0.614356	0.0737792	0.627844	0.0751173	0.628193	0.0748993	0.639749	0.0774178	0.633182	0.0769891	0.642072	0.0759322	0.653309	0.075182	0.656397	0.0767154	0.650815	0.0787092	0.640853	0.0783979	0.653441	0.0789964	0.661616	0.0784477	0.650318	0.0795537	0.649757	0.0798156	0.673786	0.079194	0.659582	0.079394	0.663986	0.0793785	0.663513	0.0784418	0.681449	0.0815939
		0.653306	0.0831498	9.76605	0.453987	41.2004	0.803042	0.548013	0.0698916	0.618444	0.0745186	0.629894	0.075512	0.644157	0.0769882	0.644714	0.0766535	0.65602	0.0792707	0.649715	0.0787677	0.661926	0.0777028	0.677343	0.0770766	0.67465	0.0784492	0.665893	0.0805391	0.657442	0.0802822	0.669595	0.0809072	0.679782	0.0802574	0.666944	0.0815042	0.666422	0.0817772	0.692107	0.0810917	0.677083	0.0812703	0.683827	0.0811803	0.687995	0.0802372	0.698455	0.0835545
		0.650436	0.0833537	11.2855	0.484539	IsoLine	IsoLine	0.559892	0.0715989	0.632103	0.0763261	0.643493	0.0772833	0.658435	0.0788754	0.659174	0.0784758	0.67026	0.0811545	0.664185	0.0806192	0.679306	0.0796346	0.698388	0.0791947	0.690628	0.0803022	0.679092	0.0823312	0.67196	0.0822093	0.683734	0.0828123	0.695683	0.0821734	0.681495	0.0834705	0.681006	0.0837556	0.708143	0.0830711	0.692401	0.0832196	0.701195	0.0831417	0.709434	0.082285	0.713341	0.0855263
		0.672271	0.0836925	13.0194	0.515733			0.569118	0.073112	0.642708	0.0780135	0.654052	0.0789496	0.669521	0.0806258	0.670402	0.0802186	0.681317	0.0829167	0.675418	0.0823935	0.692805	0.0815711	0.714738	0.0813648	0.703037	0.0821245	0.689343	0.0839402	0.683231	0.084023	0.694714	0.0845575	0.70803	0.0840404	0.692792	0.0852933	0.692328	0.0855905	0.720594	0.0849719	0.704293	0.0850841	0.714684	0.0851037	0.726094	0.0844195	0.724899	0.0873496
		0.6856	0.0838504	14.998	0.547583			0.574942	0.0743082	0.6494	0.0794441	0.660715	0.080376	0.676517	0.0820978	0.677486	0.0817407	0.688293	0.0844144	0.682505	0.083947	0.701329	0.0833554	0.72507	0.0834111	0.710871	0.0837683	0.695815	0.0852358	0.690341	0.0855764	0.701643	0.0860014	0.715823	0.0857071	0.69992	0.086825	0.699472	0.0871332	0.728453	0.0866401	0.711796	0.0867126	0.7232	0.0869074	0.736624	0.0864675	0.732193	0.0888766
		0.67309	0.0840759	17.2559	0.580102			0.576893	0.0750906	0.651637	0.0805021	0.662941	0.0814467	0.678857	0.083172	0.679855	0.0829188	0.690624	0.0855264	0.684872	0.0851538	0.704187	0.084843	0.728545	0.0851677	0.713495	0.0851005	0.697986	0.086113	0.692715	0.0867436	0.703962	0.0870269	0.71843	0.0870385	0.702301	0.0879415	0.701858	0.0882588	0.731081	0.0879406	0.714303	0.0879733	0.726054	0.0884067	0.740171	0.0882634	0.734634	0.0899836
		0.682588	0.0844261	19.8324	0.613304			Black	Black	Black	Black	Black	Black	Black	Black	Black	Black	Black	Black	Black	Black	Black	Black	Black	Black	Black	Black	Black	Black	Black	Black	Black	Black	Black	Black	Black	Black	Black	Black	Black	Black	Black	Black	Black	Black	Black	Black	Black	Black
		0.696221	0.0864418	22.7725	0.647204
		0.698497	0.0866904	26.1276	0.681816
		0.713151	0.0883918	29.9562	0.717156
		0.71974	0.0886211	34.3252	0.753238
		0.725482	0.0886823	39.3108	0.790078
		0.724167	0.0889663	45	0.827692
		0.708078	0.0892893	45	0.827693
		0.732108	0.0897635	IsoLine	IsoLine
		0.713846	0.0897823
		0.713849	0.0899478
		0.730658	0.0909522
		0.756661	0.0915839
		0.740975	0.0918366
		0.733957	0.0922938
		0.774198	0.0923175
		0.751692	0.093179
		0.764235	0.0935989
		0.788006	0.0952108
		0.766791	0.0954929
		0.810336	0.0965551
		0.82344	0.0965691
		0.817465	0.0969503
		0.81387	0.097435
		0.80578	0.0978268
		0.795379	0.0982188
		0.861502	0.100656
		0.880239	0.104798
		0.898367	0.104963
		0.880683	0.106746
		0.891572	0.107272
		1.00783	0.118149
		1.10006	0.122296
		1.12164	0.125842
		1.10775	0.126918
		1.21768	0.134662
		1.28926	0.135143
		1.73568	0.174976
		1.90468	0.175132
		2.2041	0.193155
		2.79818	0.235185
		2.76139	0.224808
		2.98613	0.23226
		3.51032	0.272741
		3.5897	0.272842
		3.45676	0.259498
		3.45896	0.251545
		5.63342	0.355645
		5.67658	0.356167
		6.04179	0.364469
		6.02586	0.361566
		5.58998	0.331721
		6.58452	0.382838
		6.40383	0.370043
		6.58546	0.379713
		6.69257	0.38054
		6.89087	0.390162
		6.60581	0.373975
		6.18934	0.347352
		7.13583	0.398365
		6.60289	0.364799
		7.46424	0.411889
		7.23506	0.398286
		7.60292	0.417215
		7.57363	0.413105
		7.25311	0.394646
		7.13288	0.387942
		7.6129	0.399549
		8.25519	0.413326
		10.4865	0.445945
		11.9045	0.490618
		13.2508	0.525659
		13.9916	0.550348
		14.5599	0.549236
		15.737	0.563624
		16.3867	0.57366
		17.3447	0.606377
		17.8945	0.558489
		34.4012	0.755208
		IsoLine	IsoLine
[truncated: 162 more columns]

## Sheet: PlotDat5
Source sheet	all data	0.527134	0.0692008	0.447683	0.06	0.482812	0.0640155	0.576893	0.0750906	0.651637	0.0805021	0.662941	0.0814467	0.678857	0.083172	0.679855	0.0829188	0.690624	0.0855264	0.684872	0.0851538	0.704187	0.084843	0.728545	0.0851677	0.713495	0.0851005	0.697986	0.086113	0.692715	0.0867436	0.703962	0.0870269	0.71843	0.0870385	0.702301	0.0879415	0.701858	0.0882588	0.731081	0.0879406	0.714303	0.0879733	0.726054	0.0884067	0.740171	0.0882634	0.734634	0.0899836
Plot name	Concordia1	0.594404	0.074844	0.457846	0.0611736	0.557657	0.0723004	0.575758	0.0753632	0.650326	0.08099	0.661636	0.0819545	0.677489	0.0836552	0.678468	0.0835076	0.689256	0.0860431	0.683481	0.0857604	0.703141	0.08552	0.727289	0.085995	0.711968	0.0858157	0.696726	0.0864478	0.691319	0.0872979	0.702608	0.0874635	0.716907	0.087738	0.700903	0.0884425	0.700456	0.0887648	0.729545	0.088598	0.712833	0.0886035	0.725008	0.0890865	0.738896	0.0891294	0.733207	0.0904749
Plot Type	1	0.605961	0.0759873	0.482812	0.0640155	0.636279	0.0806498	0.572498	0.0753665	0.64657	0.0812094	0.657898	0.0822014	0.673565	0.0838557	0.674493	0.0838335	0.685341	0.0862805	0.679501	0.0861008	0.700138	0.086038	0.723664	0.0866544	0.707583	0.0862733	0.693106	0.0865039	0.687325	0.0875686	0.698724	0.0876105	0.712539	0.0881678	0.696902	0.0886487	0.696445	0.0889744	0.72514	0.0889716	0.708621	0.0889525	0.722005	0.0896044	0.735208	0.0898378	0.729118	0.0906699
1st free col	245	0.619039	0.0771884	0.508205	0.0668651	0.718871	0.0890642	0.567256	0.0751003	0.640535	0.0811505	0.651889	0.0821767	0.667259	0.0837648	0.668105	0.0838824	0.679048	0.0862283	0.673106	0.08616	0.695261	0.086383	0.717769	0.0871277	0.700532	0.0864533	0.687284	0.0862789	0.680907	0.0875439	0.69248	0.0874616	0.705518	0.0883093	0.690472	0.0885513	0.69	0.0888785	0.718058	0.0890448	0.701853	0.0890052	0.717129	0.0899462	0.729208	0.0903694	0.722544	0.0905599
Sigma Level	2	0.619269	0.0774944	0.534033	0.0697224	0.805631	0.097544	0.56026	0.0745763	0.632484	0.0808161	0.643873	0.0818815	0.658846	0.0833865	0.659582	0.0836521	0.670654	0.0858887	0.664576	0.0859354	0.688641	0.0865454	0.709765	0.0874022	0.691121	0.0863479	0.679513	0.0857826	0.672347	0.0872249	0.684149	0.0870231	0.696149	0.0881561	0.681895	0.0881544	0.681402	0.0884813	0.708609	0.0888145	0.692823	0.0887593	0.710512	0.0901026	0.721059	0.0907096	0.713773	0.0901498
Absolute Errs	FALSE	0.630955	0.0796529	0.560304	0.0725872	0.89677	0.10609	0.551816	0.0738174	0.622768	0.0802206	0.634201	0.0813287	0.648692	0.0827373	0.649298	0.0831527	0.660525	0.0852766	0.654282	0.0854368	0.680459	0.0865209	0.69987	0.0874703	0.679764	0.0859616	0.670133	0.0850367	0.662018	0.0866256	0.674095	0.0863143	0.684843	0.087715	0.671544	0.0874754	0.671027	0.0878002	0.697207	0.0882908	0.681928	0.0882255	0.702334	0.0900694	0.710984	0.0908492	0.703188	0.0894575
Symbol Type	1	0.62424	0.0796672	0.587024	0.0754598	0.99251	0.114702	0.542293	0.0728567	0.611813	0.0793901	0.623294	0.0805425	0.637243	0.0818457	0.637701	0.0824059	0.649103	0.0844186	0.642676	0.0846861	0.670939	0.0863102	0.688353	0.0873301	0.666955	0.0853114	0.659555	0.0840738	0.650372	0.085772	0.662758	0.0853662	0.672093	0.0870052	0.659873	0.086544	0.659328	0.0868649	0.684348	0.0874966	0.669642	0.0874271	0.692819	0.0898474	0.699257	0.0907843	0.691252	0.0885132
Inverse Plot	FALSE	0.631395	0.0796928	0.614202	0.07834	1.09308	0.123382	0.532108	0.0717362	0.600097	0.078361	0.611629	0.0795572	0.624998	0.0807504	0.625299	0.0814446	0.636888	0.0833524	0.630263	0.0837161	0.660341	0.085919	0.67553	0.0869855	0.653256	0.0844256	0.64824	0.082936	0.637917	0.0847015	0.650632	0.0842202	0.658457	0.0860579	0.647392	0.0854008	0.646818	0.0857162	0.670596	0.0864665	0.656504	0.086399	0.682226	0.0894427	0.686198	0.0905167	0.678487	0.0873582
Color Plot	FALSE	0.640443	0.079836	0.641846	0.081228	1.19873	0.132129	0.521706	0.0705049	0.588132	0.0771781	0.599717	0.0784159	0.612492	0.0794995	0.612633	0.0803106	0.624414	0.0821245	0.617588	0.0825691	0.648953	0.0853579	0.66175	0.0864459	0.639264	0.083343	0.636683	0.081673	0.625198	0.083461	0.638248	0.0829263	0.644531	0.0849143	0.634646	0.0840959	0.634042	0.0844045	0.656552	0.0852456	0.643086	0.0851862	0.670845	0.0888664	0.672164	0.0900538	0.665449	0.086043
3D plot	FALSE	0.646567	0.079922	0.669963	0.0841237	1.30971	0.140944	0.511541	0.0692166	0.576441	0.0758933	0.588078	0.0771684	0.600273	0.0781476	0.600257	0.0790535	0.612226	0.0807886	0.605203	0.0812953	0.637086	0.0846423	0.647389	0.085726	0.625591	0.0821109	0.625389	0.0803401	0.612771	0.0821046	0.626148	0.0815412	0.630923	0.0836245	0.622191	0.0826863	0.621559	0.082987	0.642828	0.0838873	0.629976	0.0838416	0.658985	0.0881341	0.657537	0.089408	0.65271	0.084625
Linear	FALSE	0.642705	0.0800717	0.698561	0.0870271	1.42629	0.149828	0.502057	0.0679277	0.565535	0.0745626	0.57722	0.0758693	0.588873	0.0767537	0.588712	0.0777283	0.600856	0.0794031	0.59365	0.0799503	0.625064	0.0837917	0.632838	0.0848454	0.612835	0.0807831	0.614853	0.0789954	0.60118	0.0806916	0.614859	0.0801254	0.618228	0.0822449	0.610574	0.0812335	0.609915	0.0815256	0.630025	0.0824509	0.617747	0.0824241	0.64697	0.0872659	0.642716	0.0885971	0.640826	0.0831664
Data Range	AC3:AG104	0.631877	0.0808096	0.727649	0.0899383	IsoLine	IsoLine	0.493669	0.0666943	0.555891	0.0732442	0.567618	0.0745753	0.578793	0.0753789	0.578503	0.0763928	0.590802	0.0780284	0.583435	0.0785929	0.613214	0.0828293	0.618494	0.0838282	0.601554	0.0794177	0.605533	0.0776977	0.59093	0.0792837	0.604876	0.0787407	0.607001	0.0808356	0.600301	0.0798011	0.599618	0.0800843	0.618703	0.0809992	0.606932	0.0809955	0.635127	0.0862854	0.628106	0.0876432	0.630316	0.0817307
Filled Symbols	FALSE	0.644726	0.080838	0.757235	0.0928574			0.486744	0.0655705	0.54793	0.0719957	0.559692	0.0733431	0.570471	0.0740831	0.570075	0.0751055	0.582502	0.0767248	0.575002	0.0772825	0.601861	0.0817813	0.60475	0.0827021	0.592239	0.0780743	0.597839	0.0765038	0.582469	0.0779425	0.596634	0.0774476	0.597733	0.0794584	0.59182	0.0784517	0.591119	0.0787261	0.609357	0.0795956	0.598005	0.0796184	0.623781	0.0852194	0.614105	0.0865723	0.62164	0.0803807
ConcAge	FALSE	0.651816	0.0815684	0.787328	0.0957842			0.481584	0.0646054	0.542001	0.0708716	0.553789	0.0722264	0.564271	0.0729231	0.563797	0.0739226	0.57632	0.0755491	0.568722	0.0760764	0.591313	0.0806764	0.591978	0.0814978	0.585299	0.0768117	0.592105	0.0754658	0.576168	0.0767267	0.590495	0.0763028	0.590829	0.0781734	0.585504	0.0772442	0.584788	0.0775102	0.602394	0.0783015	0.591356	0.0783528	0.61324	0.0840969	0.601095	0.0854136	0.615177	0.0791755
ConcSwap	FALSE	0.641331	0.0816996	0.817937	0.0987189			0.478415	0.0638411	0.538361	0.0699213	0.550165	0.0712741	0.560466	0.0719495	0.559944	0.0728958	0.572526	0.0745528	0.564868	0.0750271	0.581858	0.0795446	0.580529	0.0802482	0.581037	0.075685	0.588582	0.0746291	0.572301	0.0756892	0.586725	0.0753561	0.58659	0.0770368	0.581628	0.0762315	0.580903	0.0764899	0.598119	0.0771734	0.587275	0.0772542	0.603792	0.0829485	0.589431	0.0841987	0.611209	0.0781677
1st Symbol-row	1	0.640746	0.0819842	0.849069	0.101661			0.477375	0.0633111	0.537171	0.069186	0.54898	0.0705278	0.55922	0.0712048	0.558683	0.07207	0.571286	0.0737794	0.563608	0.0741807	0.573755	0.0784169	0.570714	0.0789873	0.579638	0.0747435	0.587425	0.0740303	0.571038	0.0748756	0.58549	0.074649	0.585201	0.0760983	0.580361	0.0754578	0.579634	0.0757097	0.596719	0.0762607	0.585941	0.0763705	0.595695	0.0818057	0.579431	0.0829608	0.609909	0.0774014
		0.6639	0.0821006	0.880735	0.104612			0.47851	0.0630385	0.538482	0.068698	0.550285	0.0700201	0.560588	0.0707217	0.56007	0.0714813	0.572653	0.0732627	0.564999	0.073574	0.567224	0.077324	0.562802	0.0777496	0.581165	0.0740284	0.588684	0.0736955	0.572435	0.0743213	0.586844	0.0742124	0.586724	0.0753988	0.581758	0.0749568	0.581035	0.0752037	0.598256	0.0756032	0.587412	0.0757403	0.589169	0.0806995	0.571368	0.0817335	0.611336	0.07691
		0.650122	0.0821719	0.912942	0.10757			0.48177	0.0630352	0.542237	0.0684787	0.554024	0.0697732	0.564512	0.0705212	0.564045	0.0711554	0.576569	0.0730253	0.568979	0.0732337	0.562443	0.0762957	0.557007	0.0765688	0.58555	0.0735708	0.592304	0.0736394	0.576429	0.0740506	0.590728	0.0740654	0.591092	0.0749689	0.585759	0.0747505	0.585046	0.0749941	0.602661	0.0752297	0.591624	0.0753913	0.584392	0.0796602	0.565462	0.0805505	0.615425	0.076715
		0.653306	0.0831498	0.945702	0.110536			0.487013	0.0633013	0.548272	0.0685375	0.560032	0.0697979	0.570818	0.070612	0.570433	0.0711065	0.582861	0.0730775	0.575374	0.0731745	0.559543	0.07536	0.553488	0.0754771	0.592602	0.0733907	0.598127	0.0738644	0.582846	0.0740752	0.596972	0.0742144	0.598113	0.0748275	0.592189	0.074848	0.591492	0.0750899	0.609743	0.0751564	0.598392	0.0753385	0.581496	0.078716	0.561873	0.0794439	0.621999	0.076825
		0.650436	0.0833537	0.979022	0.113511			0.494009	0.0638253	0.556324	0.068872	0.568048	0.070093	0.579232	0.0709903	0.578956	0.0713368	0.591255	0.0734171	0.583905	0.0733991	0.558603	0.0745426	0.55234	0.0745043	0.602012	0.0734962	0.605898	0.0743607	0.591406	0.0743942	0.605303	0.0746529	0.607482	0.0749807	0.600767	0.0752449	0.60009	0.0754871	0.619191	0.0753867	0.607421	0.0755845	0.580558	0.0778928	0.5607	0.078444	0.63077	0.0772351
		0.672271	0.0836925	1.01291	0.116493			0.502453	0.0645843	0.566039	0.0694675	0.57772	0.0706458	0.589385	0.0716395	0.58924	0.0718362	0.601385	0.0740293	0.594198	0.0738976	0.559649	0.0738656	0.553597	0.073677	0.613369	0.0738824	0.615278	0.0751066	0.601735	0.0749936	0.615357	0.0753617	0.618788	0.0754218	0.611117	0.0759239	0.610465	0.0761682	0.630594	0.0759104	0.618317	0.0761183	0.581604	0.077213	0.561975	0.077578	0.641355	0.0779275
		0.6856	0.0838504	1.04738	0.119483			0.511975	0.065545	0.576994	0.0702979	0.588627	0.071432	0.600834	0.0725312	0.600837	0.0725829	0.612807	0.0748872	0.605805	0.0746483	0.562652	0.0733476	0.557222	0.0730176	0.626178	0.0745327	0.625856	0.0760695	0.613382	0.0758472	0.626694	0.0763098	0.631538	0.0761315	0.622788	0.0768553	0.622163	0.0771036	0.643452	0.0767046	0.630602	0.0769167	0.584607	0.0766951	0.565663	0.0768695	0.653291	0.0788718
		0.67309	0.0840759	1.08245	0.122481			0.52216	0.0666654	0.588711	0.0713271	0.600292	0.0724174	0.61308	0.0736264	0.613239	0.0735443	0.625021	0.0759534	0.618217	0.0756183	0.567529	0.0730026	0.563117	0.0725442	0.639877	0.0754184	0.637171	0.0772073	0.625837	0.0769176	0.63882	0.0774558	0.645174	0.0770789	0.63527	0.0779985	0.634674	0.0782522	0.657204	0.0777347	0.643741	0.0779448	0.589483	0.0763533	0.571663	0.0763379	0.666056	0.0800267
		0.682588	0.0844261	1.11811	0.125487			0.532563	0.0678967	0.600676	0.0725099	0.612204	0.0735587	0.625585	0.0748774	0.625905	0.0746783	0.637496	0.0771813	0.630892	0.0767653	0.574149	0.0728402	0.571121	0.0722698	0.653869	0.076501	0.648728	0.0784703	0.638555	0.0781582	0.651204	0.0787496	0.6591	0.0782225	0.648016	0.0793034	0.64745	0.0795639	0.671249	0.0789556	0.657158	0.0791576	0.5961	0.0761969	0.579812	0.0759977	0.679094	0.0813419
		0.696221	0.0864418	1.15438	0.128501			0.542728	0.069185	0.612366	0.0737948	0.623843	0.0748062	0.637804	0.0762293	0.638281	0.0759354	0.649684	0.0785172	0.643277	0.0780392	0.582331	0.0728646	0.581016	0.0722017	0.667542	0.0777332	0.660021	0.0798033	0.650982	0.0795146	0.663304	0.0801348	0.672708	0.0795122	0.66047	0.080713	0.659932	0.0809815	0.684973	0.0803139	0.670268	0.0805022	0.604278	0.0762301	0.589888	0.0758581	0.691833	0.0827599
		0.698497	0.0866904	1.19128	0.131524			0.552211	0.070474	0.623272	0.0751255	0.634701	0.0761053	0.649204	0.0776231	0.649826	0.0772606	0.661054	0.0799028	0.65483	0.0793841	0.591851	0.0730754	0.592533	0.0723419	0.680298	0.0790609	0.670558	0.081148	0.662574	0.0809276	0.674593	0.0815506	0.685403	0.0808919	0.672088	0.0821658	0.671577	0.0824428	0.697775	0.0817503	0.682498	0.0819197	0.613793	0.0764521	0.601615	0.075923	0.703717	0.0842186
		0.713151	0.0883918	1.2288	0.134554			0.560599	0.0717073	0.632916	0.0764439	0.644303	0.0773992	0.659284	0.078998	0.660035	0.0785961	0.671108	0.0812774	0.665046	0.0807415	0.602449	0.0734666	0.605356	0.0726865	0.69158	0.0804263	0.679877	0.0824457	0.672824	0.0823355	0.684576	0.0829353	0.69663	0.0823011	0.682361	0.0835982	0.681874	0.0838841	0.709097	0.0832021	0.693312	0.0833483	0.624385	0.0768568	0.614673	0.0761906	0.714227	0.0856542
		0.71974	0.0886211	1.26697	0.137593			0.567524	0.0728311	0.640877	0.0776924	0.652229	0.0786315	0.667606	0.0802937	0.668463	0.0798834	0.679408	0.082581	0.673478	0.0820519	0.613837	0.0740277	0.619136	0.0732261	0.700894	0.0817697	0.687572	0.0836396	0.681285	0.0836766	0.692818	0.0842284	0.705898	0.0836783	0.690841	0.0849476	0.690373	0.0852424	0.718444	0.0846057	0.702239	0.0847254	0.635767	0.0774331	0.628708	0.0766536	0.722903	0.0870042
		0.725482	0.0886823	1.30579	0.140639			0.572684	0.0737962	0.646807	0.0788164	0.658133	0.0797481	0.673806	0.0814538	0.674741	0.0810663	0.685589	0.0837567	0.679759	0.0832581	0.625704	0.0747433	0.633497	0.073946	0.707834	0.0830323	0.693306	0.0846776	0.687586	0.0848925	0.698958	0.0853732	0.712802	0.0849633	0.697157	0.086155	0.696704	0.0864582	0.725407	0.0858998	0.708889	0.085991	0.647627	0.0781654	0.643334	0.0772993	0.729366	0.0882094
		0.724167	0.0889663	1.34528	0.143694			0.575853	0.0745605	0.650447	0.0797668	0.661756	0.0807004	0.677611	0.0824274	0.678594	0.082093	0.689383	0.084753	0.683613	0.0843073	0.637726	0.0755939	0.648048	0.0748265	0.712097	0.084159	0.696829	0.0855142	0.691452	0.0859299	0.702727	0.0863199	0.717042	0.0860999	0.701034	0.0871678	0.700588	0.0874786	0.729682	0.0870278	0.712969	0.0870896	0.659642	0.0790336	0.658155	0.0781102	0.733334	0.0892172
		0.708078	0.0892893	1.38544	0.146757			0.576893	0.0750906	0.651637	0.0805021	0.662941	0.0814467	0.678857	0.083172	0.679855	0.0829188	0.690624	0.0855264	0.684872	0.0851538	0.649576	0.0765563	0.662392	0.0758438	0.713495	0.0851005	0.697986	0.086113	0.692715	0.0867436	0.703962	0.0870269	0.71843	0.0870385	0.702301	0.0879415	0.701858	0.0882588	0.731081	0.0879406	0.714303	0.0879733	0.671484	0.0800141	0.672765	0.0790641	0.734634	0.0899836
		0.732108	0.0897635	1.42629	0.149828			Black	Black	Black	Black	Black	Black	Black	Black	Black	Black	Black	Black	Black	Black	0.660929	0.0776042	0.676136	0.0769699	Black	Black	Black	Black	Black	Black	Black	Black	Black	Black	Black	Black	Black	Black	Black	Black	Black	Black	0.682831	0.0810802	0.686766	0.080135	Black	Black
		0.713846	0.0897823	1.42861	0.15																	0.671477	0.0787092	0.688908	0.0781742																			0.693372	0.0822027	0.699776	0.0812937
		0.713849	0.0899478	IsoLine	IsoLine																	0.680932	0.079841	0.700357	0.0794238																			0.70282	0.083351	0.71144	0.0825086
		0.730658	0.0909522																			0.689035	0.0809687	0.710171	0.0806847																			0.710917	0.0844938	0.72144	0.0837466
		0.756661	0.0915839																			0.695566	0.0820616	0.718084	0.0819224																			0.717443	0.0856	0.729503	0.0849738
		0.740975	0.0918366																			0.700347	0.0830899	0.723879	0.0831032																			0.72222	0.0866393	0.73541	0.0861569
		0.733957	0.0922938																			0.703247	0.0840256	0.727398	0.0841949																			0.725116	0.0875835	0.738998	0.0872634
		0.774198	0.0923175																			0.704187	0.084843	0.728545	0.0851677																			0.726054	0.0884067	0.740171	0.0882634
		0.751692	0.093179																			Black	Black	Black	Black																			Black	Black	Black	Black
		0.764235	0.0935989
		0.788006	0.0952108
		0.766791	0.0954929
		0.810336	0.0965551
		0.82344	0.0965691
		0.817465	0.0969503
		0.81387	0.097435
		0.80578	0.0978268
		0.795379	0.0982188
		0.861502	0.100656
		0.880239	0.104798
		0.898367	0.104963
		0.880683	0.106746
		0.891572	0.107272
		1.00783	0.118149
		1.10006	0.122296
		1.12164	0.125842
		1.10775	0.126918
		1.21768	0.134662
		1.28926	0.135143
		1.73568	0.174976
		1.90468	0.175132
		2.2041	0.193155
		2.79818	0.235185
		2.76139	0.224808
		2.98613	0.23226
		3.51032	0.272741
		3.5897	0.272842
		3.45676	0.259498
		3.45896	0.251545
		5.63342	0.355645
		5.67658	0.356167
		6.04179	0.364469
		6.02586	0.361566
		5.58998	0.331721
		6.58452	0.382838
		6.40383	0.370043
		6.58546	0.379713
		6.69257	0.38054
		6.89087	0.390162
		6.60581	0.373975
		6.18934	0.347352
		7.13583	0.398365
		6.60289	0.364799
		7.46424	0.411889
		7.23506	0.398286
		7.60292	0.417215
		7.57363	0.413105
		7.25311	0.394646
		7.13288	0.387942
		7.6129	0.399549
		8.25519	0.413326
		10.4865	0.445945
		11.9045	0.490618
		13.2508	0.525659
		13.9916	0.550348
		14.5599	0.549236
		15.737	0.563624
		16.3867	0.57366
		17.3447	0.606377
		17.8945	0.558489
		34.4012	0.755208
		IsoLine	IsoLine
[truncated: 194 more columns]

## Sheet: PlotDat6
Source sheet	all data	0.630955	0.0796529	0.558806	0.0723004	0.589866	0.0756324	0.621545	0.0789747	0.653855	0.0823274	0.68681	0.0856906	0.72042	0.0890642	0.54	0.0703767	0.54	0.0702507	0.54	0.0705026	0.527276	0.0689787	0.690624	0.0855264	0.704187	0.084843	0.692715	0.0867436	0.675431	0.0841747
Plot name	Concordia3	0.631395	0.0796928	0.558759	0.072328	0.589816	0.0756613	0.621492	0.079005	0.653799	0.082359	0.68675	0.0857235	0.720358	0.0890984	0.54	0.0703767	0.54	0.0702507	0.54	0.0705026	0.557657	0.0723004	0.690001	0.085901	0.703847	0.0852399	0.692078	0.0871437	0.674965	0.0844827
Plot Type	1	0.631877	0.0808096	0.558623	0.0723534	0.589672	0.0756879	0.621338	0.0790328	0.653636	0.0823881	0.686577	0.0857538	0.720174	0.0891299	0.545881	0.0710195	0.545881	0.0708923	0.545881	0.0711467	0.588642	0.0756324	0.688228	0.0861541	0.702888	0.0855895	0.69027	0.0874205	0.673638	0.0847042
1st free col	33	IsoLine	IsoLine	0.558409	0.0723745	0.589443	0.07571	0.621096	0.0790559	0.653379	0.0824122	0.686304	0.0857789	0.719886	0.0891561	0.551785	0.0716627	0.551785	0.0715344	0.551785	0.0717911	0.620244	0.0789747	0.685341	0.0862805	0.70132	0.0858888	0.687325	0.0875686	0.671476	0.084835
Sigma Level	2			0.558134	0.0723896	0.58915	0.0757258	0.620784	0.0790724	0.653048	0.0824294	0.685954	0.0857969	0.719514	0.0891748	0.557712	0.0723064	0.557712	0.0721768	0.557712	0.0724359	0.652474	0.0823274	0.681395	0.086278	0.699155	0.0861352	0.683301	0.0875852	0.668523	0.0848724
Absolute Errs	FALSE			0.55782	0.0723974	0.588816	0.075734	0.620429	0.079081	0.652671	0.0824384	0.685554	0.0858063	0.719091	0.0891846	0.563661	0.0729504	0.563661	0.0728196	0.563661	0.0730811	0.685345	0.0856906	0.676468	0.0861466	0.696412	0.0863266	0.678275	0.0874699	0.664835	0.0848157
Symbol Type	1			0.557493	0.0723974	0.588468	0.075734	0.620058	0.079081	0.652277	0.0824384	0.685137	0.0858063	0.71865	0.0891846	0.569632	0.0735948	0.569632	0.0734628	0.569632	0.0737267	0.718871	0.0890642	0.670654	0.0858887	0.693115	0.0864615	0.672347	0.0872249	0.660484	0.0846661
Inverse Plot	FALSE			0.557179	0.0723896	0.588133	0.0757258	0.619703	0.0790724	0.6519	0.0824294	0.684737	0.0857969	0.718227	0.0891748	0.575627	0.0742395	0.575627	0.0741064	0.575627	0.0743727	IsoLine	IsoLine	0.664068	0.0855095	0.689291	0.0865386	0.665631	0.0868551	0.655554	0.0844265
Color Plot	FALSE			0.556904	0.0723745	0.58784	0.07571	0.619391	0.0790559	0.651569	0.0824122	0.684386	0.0857789	0.717856	0.0891561	0.581644	0.0748847	0.581644	0.0747504	0.581644	0.075019			0.656837	0.0850162	0.684972	0.0865573	0.658258	0.0863677	0.650143	0.0841015
3D plot	FALSE			0.55669	0.0723534	0.587612	0.0756879	0.619149	0.0790328	0.651312	0.0823881	0.684114	0.0857538	0.717567	0.0891299	0.587685	0.0755303	0.587685	0.0753947	0.587685	0.0756658			0.649103	0.0844186	0.680197	0.0865174	0.650372	0.085772	0.644354	0.0836975
Linear	FALSE			0.556554	0.072328	0.587468	0.0756613	0.618995	0.079005	0.651148	0.082359	0.68394	0.0857235	0.717384	0.0890984	0.593748	0.0761762	0.593748	0.0760395	0.593748	0.0763129			0.641015	0.0837283	0.675006	0.0864193	0.642125	0.0850797	0.638301	0.0832222
Data Range	AC8:AG14			0.556508	0.0723004	0.587418	0.0756324	0.618942	0.0789747	0.651092	0.0823274	0.683881	0.0856906	0.717321	0.0890642	0.599835	0.0768225	0.599835	0.0766846	0.599835	0.0769605			0.632732	0.0829586	0.669442	0.0862638	0.633679	0.0843044	0.632102	0.0826851
Filled Symbols	FALSE			0.556554	0.0722728	0.587468	0.0756034	0.618995	0.0789445	0.651148	0.0822958	0.68394	0.0856576	0.717384	0.0890299	0.605945	0.0774693	0.605945	0.0773301	0.605945	0.0776084			0.624414	0.0821245	0.663554	0.0860522	0.625198	0.083461	0.625877	0.0820964
ConcAge	TRUE			0.55669	0.0722474	0.587612	0.0755769	0.619149	0.0789166	0.651312	0.0822668	0.684114	0.0856274	0.717567	0.0889984	0.612078	0.0781164	0.612078	0.077976	0.612078	0.0782567			0.616223	0.0812424	0.657391	0.0857864	0.616847	0.082566	0.619747	0.0814677
ConcSwap	FALSE			0.556904	0.0722263	0.58784	0.0755548	0.619391	0.0788935	0.651569	0.0822427	0.684386	0.0856022	0.717856	0.0889722	0.618234	0.0787639	0.618234	0.0786223	0.618234	0.0789054			0.608319	0.0803293	0.651007	0.0854686	0.608789	0.0816368	0.613832	0.0808113
1st Symbol-row	1			0.557179	0.0722112	0.588133	0.075539	0.619703	0.078877	0.6519	0.0822254	0.684737	0.0855842	0.718227	0.0889535	0.624415	0.0794117	0.624415	0.079269	0.624415	0.0795545			0.600856	0.0794031	0.644455	0.0851016	0.60118	0.0806916	0.608246	0.0801398
				0.557493	0.0722034	0.588468	0.0755307	0.620058	0.0788684	0.652277	0.0822164	0.685137	0.0855749	0.71865	0.0889437	0.630618	0.08006	0.630618	0.0799161	0.630618	0.080204			0.593978	0.0784817	0.637792	0.0846884	0.594168	0.0797486	0.603099	0.0794664
				0.55782	0.0722034	0.588816	0.0755307	0.620429	0.0788684	0.652671	0.0822164	0.685554	0.0855749	0.719091	0.0889437	0.636846	0.0807087	0.636846	0.0805635	0.636846	0.0808538			0.58782	0.0775831	0.631074	0.0842325	0.58789	0.0788263	0.598491	0.0788042
				0.558134	0.0722112	0.58915	0.075539	0.620784	0.078877	0.653048	0.0822254	0.685954	0.0855842	0.719514	0.0889535	0.643097	0.0813577	0.643097	0.0812114	0.643097	0.0815041			0.582502	0.0767248	0.624359	0.0837379	0.582469	0.0779425	0.594511	0.078166
				0.558409	0.0722263	0.589443	0.0755548	0.621096	0.0788935	0.653379	0.0822427	0.686304	0.0856022	0.719886	0.0889722	0.649372	0.0820072	0.649372	0.0818596	0.649372	0.0821547			0.578127	0.0759235	0.617704	0.0832089	0.578009	0.0771146	0.591237	0.0775643
				0.558623	0.0722474	0.589672	0.0755769	0.621338	0.0789166	0.653636	0.0822668	0.686577	0.0856274	0.720174	0.0889984	0.655671	0.082657	0.655671	0.0825082	0.655671	0.0828058			0.57478	0.0751948	0.611166	0.0826498	0.574598	0.0763586	0.588732	0.0770108
				0.558759	0.0722728	0.589816	0.0756034	0.621492	0.0789445	0.653799	0.0822958	0.68675	0.0856576	0.720358	0.0890299	0.661994	0.0833072	0.661994	0.0831572	0.661994	0.0834572			0.572526	0.0745528	0.6048	0.0820655	0.572301	0.0756892	0.587046	0.0765162
				0.558806	0.0723004	0.589866	0.0756324	0.621545	0.0789747	0.653855	0.0823274	0.68681	0.0856906	0.72042	0.0890642	0.668341	0.0839578	0.668341	0.0838066	0.668341	0.0841091			0.57141	0.0740102	0.598661	0.0814609	0.571164	0.0751195	0.586211	0.0760903
				ConcTikEll	ConcTikEll	ConcTikEll	ConcTikEll	ConcTikEll	ConcTikEll	ConcTikEll	ConcTikEll	ConcTikEll	ConcTikEll	ConcTikEll	ConcTikEll	0.674713	0.0846088	0.674713	0.0844564	0.674713	0.0847613			0.571453	0.0735773	0.592802	0.0808413	0.571209	0.0746606	0.586244	0.0757412
																0.681109	0.0852602	0.681109	0.0851066	0.681109	0.0854139			0.572653	0.0732627	0.587272	0.0802119	0.572435	0.0743213	0.587143	0.0754758
																0.687529	0.085912	0.687529	0.0857571	0.687529	0.0860669			0.574989	0.0730725	0.582118	0.079578	0.574817	0.0741083	0.588891	0.0752992
																0.693974	0.0865642	0.693974	0.0864081	0.693974	0.0867203			0.578414	0.0730104	0.577385	0.0789451	0.57831	0.0740258	0.591454	0.0752149
																0.700443	0.0872168	0.700443	0.0870594	0.700443	0.0873741			0.582861	0.0730775	0.573112	0.0783186	0.582846	0.0740752	0.594783	0.0752246
																0.706937	0.0878697	0.706937	0.0877112	0.706937	0.0880283			0.588245	0.0732727	0.569337	0.0777038	0.588336	0.0742558	0.598813	0.0753279
																0.713456	0.0885231	0.713456	0.0883633	0.713456	0.0886829			0.59446	0.073592	0.566091	0.077106	0.594674	0.0745639	0.603464	0.075523
																0.72	0.0891768	0.72	0.0890158	0.72	0.0893378			0.601385	0.0740293	0.563403	0.0765303	0.601735	0.0749936	0.608647	0.075806
																0.72	0.0891768	0.72	0.0890158	0.72	0.0893378			0.608886	0.074576	0.561294	0.0759815	0.609384	0.0755365	0.614261	0.0761714
																IsoLine	IsoLine	ConcBand	ConcBand	ConcBand	ConcBand			0.616816	0.0752216	0.559784	0.0754644	0.61747	0.076182	0.620196	0.0766122
																								0.625021	0.0759534	0.558884	0.0749834	0.625837	0.0769176	0.626338	0.0771196
																								0.633342	0.0767572	0.558603	0.0745426	0.634321	0.077729	0.632565	0.0776839
																								0.641617	0.0776174	0.558943	0.0741457	0.642757	0.0786003	0.638758	0.078294
																								0.649684	0.0785172	0.559902	0.0737961	0.650982	0.0795146	0.644795	0.0789382
																								0.657386	0.0794391	0.56147	0.0734968	0.658835	0.0804541	0.650559	0.0796037
																								0.664574	0.0803652	0.563635	0.0732504	0.666163	0.0814005	0.655939	0.0802778
																								0.671108	0.0812774	0.566378	0.073059	0.672824	0.0823355	0.660828	0.0809473
																								0.67686	0.082158	0.569675	0.0729241	0.678688	0.0832407	0.665133	0.0815991
																								0.681719	0.0829898	0.573499	0.072847	0.683641	0.0840986	0.668769	0.0822205
																								0.685589	0.0837567	0.577818	0.0728283	0.687586	0.0848925	0.671665	0.0827995
																								0.688396	0.0844437	0.582593	0.0728682	0.690447	0.0856069	0.673765	0.0833249
																								0.690086	0.0850375	0.587784	0.0729663	0.692168	0.086228	0.675029	0.0837862
																								0.690624	0.0855264	0.593348	0.0731218	0.692715	0.0867436	0.675431	0.0841747
																								Black	Black	0.599236	0.0733333	Black	Black
																										0.605399	0.0735991
																										0.611784	0.0739169
																										0.618335	0.074284
																										0.624998	0.0746972
																										0.631716	0.0751531
																										0.638431	0.0756476
																										0.645086	0.0761767
																										0.651624	0.0767358
																										0.65799	0.0773201
																										0.664129	0.0779246
																										0.669988	0.0785443
																										0.675518	0.0791737
																										0.680672	0.0798076
																										0.685405	0.0804405
																										0.689678	0.081067
																										0.693453	0.0816817
																										0.696699	0.0822796
																										0.699387	0.0828553
																										0.701496	0.0834041
																										0.703006	0.0839212
																										0.703906	0.0844022
																										0.704187	0.084843
																										Black	Black

## Sheet: PlotDat8
Source sheet	all data	0.644726	0.080838	0.589866	0.0756324	0.621545	0.0789747	0.653855	0.0823274	0.68681	0.0856906	0.72042	0.0890642	0.56	0.0725543	0.56	0.0724243	0.56	0.0726843	0.557657	0.0723004	0.703962	0.0870269	0.71843	0.0870385	0.702301	0.0879415	0.714303	0.0879733	0.726054	0.0884067	0.683298	0.0851451
Plot name	Concordia2	0.651816	0.0815684	0.589816	0.0756613	0.621492	0.079005	0.653799	0.082359	0.68675	0.0857235	0.720358	0.0890984	0.56	0.0725543	0.56	0.0724243	0.56	0.0726843	0.588642	0.0756324	0.703345	0.0873495	0.717737	0.0875335	0.701664	0.0883074	0.713633	0.0884235	0.725713	0.0888056	0.682794	0.0854123
Plot Type	1	0.641331	0.0816996	0.589672	0.0756879	0.621338	0.0790328	0.653636	0.0823881	0.686577	0.0857538	0.720174	0.0891299	0.565885	0.0731907	0.565885	0.0730595	0.565885	0.0733219	0.620244	0.0789747	0.701588	0.0875453	0.71576	0.0879124	0.699853	0.0885447	0.711726	0.0887521	0.724755	0.0891562	0.681354	0.0855826
1st free col	35	0.650122	0.0821719	0.589443	0.07571	0.621096	0.0790559	0.653379	0.0824122	0.686304	0.0857789	0.719886	0.0891561	0.571793	0.0738274	0.571793	0.073695	0.571793	0.0739597	0.652474	0.0823274	0.698724	0.0876105	0.712539	0.0881678	0.696902	0.0886487	0.708621	0.0889525	0.723187	0.0894555	0.679018	0.0856512
Sigma Level	2	0.653306	0.0831498	0.58915	0.0757258	0.620784	0.0790724	0.653048	0.0824294	0.685954	0.0857969	0.719514	0.0891748	0.577722	0.0744645	0.577722	0.0743309	0.577722	0.074598	0.685345	0.0856906	0.694809	0.087544	0.708136	0.0882948	0.69287	0.0886175	0.704377	0.089021	0.721022	0.0897011	0.675849	0.0856165
Absolute Errs	FALSE	IsoLine	IsoLine	0.588816	0.075734	0.620429	0.079081	0.652671	0.0824384	0.685554	0.0858063	0.719091	0.0891846	0.583675	0.0751019	0.583675	0.0749672	0.583675	0.0752366	0.718871	0.0890642	0.689919	0.0873469	0.702637	0.0882909	0.687835	0.0884517	0.699076	0.0889562	0.71828	0.0898908	0.671935	0.0854792
Symbol Type	1			0.588468	0.075734	0.620058	0.079081	0.652277	0.0824384	0.685137	0.0858063	0.71865	0.0891846	0.589649	0.0757398	0.589649	0.0756039	0.589649	0.0758757	IsoLine	IsoLine	0.684149	0.0870231	0.696149	0.0881561	0.681895	0.0881544	0.692823	0.0887593	0.714984	0.0900229	0.667381	0.0852432
Inverse Plot	FALSE			0.588133	0.0757258	0.619703	0.0790724	0.6519	0.0824294	0.684737	0.0857969	0.718227	0.0891748	0.595646	0.076378	0.595646	0.0762409	0.595646	0.0765151			0.677612	0.0865789	0.688798	0.0878931	0.675165	0.0877315	0.685739	0.0884342	0.711161	0.0900964	0.662311	0.0849148
Color Plot	FALSE			0.58784	0.07571	0.619391	0.0790559	0.651569	0.0824122	0.684386	0.0857789	0.717856	0.0891561	0.601666	0.0770166	0.601666	0.0768783	0.601666	0.0771549			0.670435	0.086023	0.680727	0.0875069	0.667776	0.0871912	0.677962	0.0879872	0.706845	0.0901107	0.656865	0.0845031
3D plot	FALSE			0.587612	0.0756879	0.619149	0.0790328	0.651312	0.0823881	0.684114	0.0857538	0.717567	0.0891299	0.607708	0.0776556	0.607708	0.0775161	0.607708	0.077795			0.662758	0.0853662	0.672093	0.0870052	0.659873	0.086544	0.669642	0.0874271	0.702072	0.0900656	0.651191	0.0840193
Linear	FALSE			0.587468	0.0756613	0.618995	0.079005	0.651148	0.082359	0.68394	0.0857235	0.717384	0.0890984	0.613774	0.0782949	0.613774	0.0781543	0.613774	0.0784356			0.654729	0.0846212	0.663064	0.0863977	0.651609	0.0858025	0.660943	0.0867646	0.696883	0.0899614	0.645443	0.0834765
Data Range	AC15:AG21			0.587418	0.0756324	0.618942	0.0789747	0.651092	0.0823274	0.683881	0.0856906	0.717321	0.0890642	0.619862	0.0789346	0.619862	0.0787928	0.619862	0.0790765			0.646506	0.0838026	0.653817	0.0856962	0.643145	0.0849811	0.652033	0.0860128	0.691322	0.0897992	0.639778	0.0828896
Filled Symbols	FALSE			0.587468	0.0756034	0.618995	0.0789445	0.651148	0.0822958	0.68394	0.0856576	0.717384	0.0890299	0.625973	0.0795748	0.625973	0.0794317	0.625973	0.0797178			0.638248	0.0829263	0.644531	0.0849143	0.634646	0.0840959	0.643086	0.0851862	0.685437	0.0895802	0.634351	0.0822745
ConcAge	TRUE			0.587612	0.0755769	0.619149	0.0789166	0.651312	0.0822668	0.684114	0.0856274	0.717567	0.0889984	0.632107	0.0802153	0.632107	0.080071	0.632107	0.0803595			0.630117	0.0820094	0.635386	0.0840673	0.626276	0.083164	0.634276	0.0843009	0.679278	0.0893063	0.62931	0.0816481
ConcSwap	FALSE			0.58784	0.0755548	0.619391	0.0788935	0.651569	0.0822427	0.684386	0.0856022	0.717856	0.0889722	0.638264	0.0808561	0.638264	0.0807107	0.638264	0.0810016			0.622269	0.0810696	0.626561	0.0831717	0.6182	0.0822037	0.625774	0.0833742	0.672897	0.08898	0.624793	0.0810275
1st Symbol-row	1			0.588133	0.075539	0.619703	0.078877	0.6519	0.0822254	0.684737	0.0855842	0.718227	0.0889535	0.644445	0.0814974	0.644445	0.0813508	0.644445	0.081644			0.614859	0.0801254	0.618228	0.0822449	0.610574	0.0812335	0.617747	0.0824241	0.666349	0.0886038	0.620921	0.0804295
				0.588468	0.0755307	0.620058	0.0788684	0.652277	0.0822164	0.685137	0.0855749	0.71865	0.0889437	0.650648	0.082139	0.650648	0.0819912	0.650648	0.0822868			0.60803	0.079195	0.610549	0.0813049	0.603546	0.0802724	0.610349	0.081469	0.65969	0.0881812	0.617802	0.0798705
				0.588816	0.0755307	0.620429	0.0788684	0.652671	0.0822164	0.685554	0.0855749	0.719091	0.0889437	0.656876	0.082781	0.656876	0.082632	0.656876	0.0829301			0.601916	0.0782966	0.603672	0.08037	0.597255	0.0793391	0.603726	0.0805277	0.652976	0.0877156	0.615521	0.0793657
				0.58915	0.075539	0.620784	0.078877	0.653048	0.0822254	0.685954	0.0855842	0.719514	0.0889535	0.663126	0.0834234	0.663126	0.0832732	0.663126	0.0835737			0.596634	0.0774476	0.597733	0.0794584	0.59182	0.0784517	0.598005	0.0796184	0.646265	0.0872111	0.614138	0.078929
				0.589443	0.0755548	0.621096	0.0788935	0.653379	0.0822427	0.686304	0.0856022	0.719886	0.0889722	0.669401	0.0840662	0.669401	0.0839148	0.669401	0.0842176			0.592289	0.0766647	0.592847	0.078588	0.58735	0.0776275	0.593299	0.0787587	0.639614	0.0866719	0.613693	0.0785721
				0.589672	0.0755769	0.621338	0.0789166	0.653636	0.0822668	0.686577	0.0856274	0.720174	0.0889984	0.675699	0.0847094	0.675699	0.0845567	0.675699	0.084862			0.588964	0.0759629	0.589108	0.0777755	0.58393	0.0768826	0.589699	0.0779655	0.63308	0.0861027	0.614197	0.0783049
				0.589816	0.0756034	0.621492	0.0789445	0.653799	0.0822958	0.68675	0.0856576	0.720358	0.0890299	0.68202	0.0853529	0.68202	0.0851991	0.68202	0.0855067			0.586725	0.0753561	0.58659	0.0770368	0.581628	0.0762315	0.587275	0.0772542	0.626719	0.0855083	0.615637	0.0781346
				0.589866	0.0756324	0.621545	0.0789747	0.653855	0.0823274	0.68681	0.0856906	0.72042	0.0890642	0.688366	0.0859968	0.688366	0.0858418	0.688366	0.0861519			0.585614	0.074856	0.585341	0.0763864	0.580487	0.0756868	0.586074	0.0766386	0.620584	0.0848937	0.617973	0.0780659
				ConcTikEll	ConcTikEll	ConcTikEll	ConcTikEll	ConcTikEll	ConcTikEll	ConcTikEll	ConcTikEll	ConcTikEll	ConcTikEll	0.694735	0.0866411	0.694735	0.0864849	0.694735	0.0867974			0.585655	0.0744723	0.585386	0.0758368	0.580531	0.0752591	0.58612	0.0761307	0.614728	0.0842643	0.621141	0.0781007
														0.701129	0.0872858	0.701129	0.0871284	0.701129	0.0874433			0.586844	0.0742124	0.586724	0.0753988	0.581758	0.0749568	0.587412	0.0757403	0.609202	0.0836254	0.625056	0.078238
														0.707547	0.0879309	0.707547	0.0877722	0.707547	0.0880896			0.589161	0.0740816	0.589329	0.0750808	0.584145	0.0747857	0.589924	0.0754752	0.604052	0.0829824	0.62961	0.078474
														0.713989	0.0885763	0.713989	0.0884165	0.713989	0.0887362			0.592559	0.0740823	0.59315	0.0748892	0.587645	0.0747492	0.593608	0.0753404	0.599322	0.0823408	0.634679	0.0788023
														0.720455	0.0892222	0.720455	0.0890611	0.720455	0.0893833			0.596972	0.0742144	0.598113	0.0748275	0.592189	0.074848	0.598392	0.0753385	0.595053	0.0817062	0.640125	0.0792141
														0.726945	0.0898684	0.726945	0.0897061	0.726945	0.0900307			0.602315	0.0744755	0.604122	0.0748971	0.597691	0.0750801	0.604183	0.0754697	0.591281	0.0810838	0.6458	0.0796979
														0.73346	0.090515	0.73346	0.0903515	0.73346	0.0906785			0.608483	0.0748604	0.611058	0.0750964	0.604041	0.0754411	0.610868	0.0757313	0.588037	0.0804791	0.651548	0.0802407
														0.74	0.091162	0.74	0.0909972	0.74	0.0913267			0.615357	0.0753617	0.618788	0.0754218	0.611117	0.0759239	0.618317	0.0761183	0.585351	0.0798972	0.657212	0.0808276
														0.74	0.091162	0.74	0.0909972	0.74	0.0913267			0.622802	0.0759695	0.627161	0.0758668	0.618782	0.0765191	0.626385	0.0766231	0.583245	0.079343	0.662639	0.0814427
														IsoLine	IsoLine	ConcBand	ConcBand	ConcBand	ConcBand			0.630674	0.0766721	0.636014	0.0764228	0.626885	0.0772152	0.634915	0.0772359	0.581736	0.0788213	0.66768	0.0820691
																						0.63882	0.0774558	0.645174	0.0770789	0.63527	0.0779985	0.643741	0.0779448	0.580838	0.0783365	0.672198	0.0826897
																						0.647081	0.0783053	0.654464	0.0778224	0.643772	0.0788539	0.652691	0.078736	0.580558	0.0778928	0.676069	0.0832877
																						0.655295	0.0792041	0.663702	0.0786388	0.652227	0.0797646	0.661591	0.079594	0.580899	0.0774939	0.679188	0.0838467
																						0.663304	0.0801348	0.672708	0.0795122	0.66047	0.080713	0.670268	0.0805022	0.581857	0.0771433	0.68147	0.0843515
																						0.670952	0.0810791	0.681308	0.0804257	0.66834	0.0816807	0.678553	0.0814429	0.583425	0.076844	0.682853	0.0847882
																						0.678089	0.0820187	0.689334	0.0813614	0.675685	0.0826487	0.686285	0.0823978	0.585589	0.0765984	0.683298	0.0851451
																						0.684576	0.0829353	0.69663	0.0823011	0.682361	0.0835982	0.693312	0.0833483	0.588332	0.0764087
																						0.690288	0.0838111	0.703053	0.0832266	0.688238	0.0845108	0.699499	0.0842759	0.591628	0.0762766
																						0.695113	0.0846291	0.708479	0.0841198	0.693203	0.0853686	0.704725	0.0851625	0.59545	0.0762031
																						0.698958	0.0853732	0.712802	0.0849633	0.697157	0.086155	0.708889	0.085991	0.599767	0.0761888
																						0.701746	0.0860291	0.715939	0.0857408	0.700026	0.0868548	0.711908	0.0867451	0.60454	0.076234
																						0.703425	0.0865839	0.717827	0.086437	0.701751	0.0874542	0.713725	0.0874102	0.609729	0.0763381
																						0.703962	0.0870269	0.71843	0.0870385	0.702301	0.0879415	0.714303	0.0879733	0.615289	0.0765003
																						Black	Black	Black	Black	Black	Black	Black	Black	0.621175	0.0767193
																														0.627334	0.0769932
																														0.633715	0.0773196
																														0.640263	0.0776957
																														0.646922	0.0781183
																														0.653636	0.0785839
																														0.660347	0.0790884
																														0.666998	0.0796276
																														0.673532	0.0801968
																														0.679893	0.0807912
																														0.686028	0.0814058
																														0.691883	0.0820352
																														0.69741	0.0826741
																														0.70256	0.0833171
																														0.70729	0.0839587
																														0.711559	0.0845934
																														0.715331	0.0852157
																														0.718575	0.0858204
																														0.721261	0.0864023
																														0.723367	0.0869565
																														0.724876	0.0874782
																														0.725774	0.087963
																														0.726054	0.0884067
																														Black	Black

## Sheet: data table
EC-PO-66	207Pb	Ua	Pba	Thc	206Pb	206Pbe	2 s	207Pbe	2 s	207Pbe	2 s	rho	206Pb	2 s	207Pb	2 s	207Pb	2 s
Spot number	(cps)	(ppm)	(ppm)	U	204Pb	238U	%	235U	%	206Pb	%		238U	(Ma)	235U	(Ma)	206Pb	(Ma)	conc %
A-4	25196.7	106.1	44.4323	1.24612	0	0.3983	6.7082	7.235	7.21165	0.1318	2.6	0.930189	2161.14	123.175	2140.83	64.3339	2121.4	46.3797	101.873
A-5	10191	205.666	17.6097	0.47664	0.0487302	0.08669	6.74056	0.6985	7.17029	0.05845	2.4	0.940068	535.934	34.6641	537.893	29.941	546.208	53.4183	98.119
A-6	2421.52	68.8699	7.14739	0.36808	0	0.104	6.79661	1.004	8.64209	0.07001	5.3	0.786455	637.905	41.2799	705.732	43.9581	928.069	109.607	68.7347
A-7	1615.87	66.0693	6.40419	0.673986	0	0.09823	6.84206	0.7777	10.2058	0.05744	7.6	0.670409	604.016	39.4501	584.149	45.3335	507.657	166.539	118.981
A-8	10785.5	416.855	37.7564	0.449651	0	0.09158	6.7134	0.7567	7.33383	0.05994	3	0.915402	564.898	36.3097	572.082	32.0755	600.733	63.9088	94.0347
A-9	12930.3	415.215	42.0056	0.439591	0.0726375	0.1017	6.65933	0.9326	7.25684	0.06652	2.9	0.917663	624.391	39.63	668.982	35.5568	822.224	60.2054	75.9393
A-10	8943.44	391.097	31.2099	0.704433	0	0.08084	6.84542	0.6447	7.50719	0.05786	3.1	0.911848	501.123	33.0045	505.228	29.8806	523.859	67.5904	95.6599
A-11	5984.61	217.571	19.8799	0.399409	1.29197	0.09232	6.85365	0.7742	8.13478	0.06084	4.4	0.842512	569.229	37.3401	582.168	36.0434	632.975	94.3533	89.9291
A-12	19301	683.666	63.231	0.833289	0.00959455	0.09327	6.73683	0.8097	7.15875	0.06298	2.4	0.941063	574.845	37.0499	602.267	32.5218	706.879	51.5037	81.3216
A-13	3675.95	161.786	13.4304	0.802194	0	0.08408	6.83094	0.6731	8.34288	0.05808	4.8	0.818775	520.406	34.1516	522.589	34.08	532.143	104.898	97.7942
A-14	8483.85	34.7941	15.1283	0.516107	0.0761665	0.4131	6.90939	7.574	7.49205	0.133	2.9	0.92223	2229.1	130.21	2181.74	67.2001	2137.51	50.6595	104.285
A-15	19928.5	751.851	65.6103	0.470424	0.0812397	0.08785	6.86085	0.7859	7.30473	0.0649	2.5	0.939234	542.836	35.7182	588.842	32.6395	770.397	52.7908	70.4619
A-16	158241	245.66	156.265	0.295302	0.0236753	0.5585	6.70427	17.89	6.83438	0.2325	1.3	0.980963	2860.38	154.875	2984.08	65.7223	3068.53	21.2117	93.2166
A-17	9342.02	418.466	34.5858	0.247631	0.214423	0.08369	6.81491	0.6723	7.57958	0.05828	3.3	0.899115	518.125	33.928	522.093	30.9395	539.486	72.5678	96.0405
A-18	5310.53	242.184	18.5964	0.223144	0.0632579	0.07761	6.77646	0.6456	7.53389	0.06034	3.3	0.899464	481.87	31.4632	505.741	30.0104	615.212	71.0993	78.3258
A-19	4476.45	196.493	15.7735	0.381635	0.356018	0.08104	6.77949	0.6904	8.15963	0.0618	4.5	0.830857	502.311	32.7611	533.018	33.8374	666.715	97.225	75.3412
A-20	8085.93	389.86	30.6332	0.216519	0	0.07967	6.67152	0.6242	7.9363	0.05685	4.3	0.840633	494.136	31.7346	492.502	30.9706	484.907	94.8995	101.903
A-21	3560.39	136.199	11.6654	0.912977	0.188905	0.08648	6.65027	0.7344	8.26691	0.06161	4.9	0.804445	534.668	34.1223	559.128	35.543	659.98	105.266	81.0128
A-22	2000.77	74.8802	6.81068	0.582224	0	0.09224	6.85217	0.7199	10.119	0.05662	7.4	0.677156	568.754	37.3022	550.591	43.006	476.146	164.642	119.449
A-23	1955.88	112.492	10.608	0.430123	0.246317	0.09549	6.88427	0.7668	9.29335	0.05825	6.2	0.740774	587.941	38.6846	577.921	40.9538	538.719	136.568	109.137
A-27	4617.05	183.903	17.0128	1.15755	0	0.0936	6.92121	0.7642	9.65552	0.05924	6.7	0.716813	576.787	38.1868	576.45	42.4694	575.124	146.374	100.289
A-28	28445.6	1.42797	0.559809	0.828496	0	0.374	6.74138	6.606	6.99055	0.1281	1.8	0.964356	2048.08	118.285	2060.12	61.6484	2072.2	32.5879	98.8361
A-29	213007	540.687	261.658	0.246434	0.00283603	0.4459	6.82833	10.49	7.00393	0.1706	1.6	0.974929	2377.2	135.757	2478.73	64.9254	2563.03	26.0712	92.7494
A-30	11799.6	431.992	41.6514	1.62734	0.041906	0.09744	6.67325	0.8139	7.27931	0.0606	2.9	0.916742	599.36	38.1937	604.623	33.1642	624.401	62.7031	95.9895
A-31	5637.61	29.8303	11.0219	2.8564	0.116642	0.3562	6.74912	5.677	7.96856	0.1156	4.2	0.846969	1963.98	114.263	1927.81	68.7927	1889.15	76.245	103.961
A-32	5794.91	166.538	15.5463	0.687034	0.193165	0.09332	7.02586	0.9381	8.01449	0.07293	3.9	0.876645	575.17	38.6603	671.907	39.3902	1011.37	78.1752	56.8704
A-33	7416.99	333.16	26.1877	0.280068	0.102746	0.07965	6.81394	0.631	7.72715	0.05747	3.6	0.881818	494.051	32.4066	496.69	30.3533	508.876	80.1238	97.0867
A-34	7516.64	337.372	27.1877	0.262365	0	0.0817	6.95472	0.6413	7.76792	0.05695	3.5	0.895313	506.26	33.8619	503.13	30.8191	488.921	76.3404	103.546
A-35	43248.9	1404.12	128.722	0.375345	0	0.09244	6.82628	0.8035	6.97982	0.06305	1.5	0.978002	569.971	37.2374	598.78	31.5742	709.447	30.9568	80.3402
A-36	102339	218.76	132.1	0.258665	0.0377735	0.5503	6.68529	13.99	6.8643	0.1844	1.6	0.973921	2826.62	152.984	2749.14	65.0498	2692.72	25.732	104.973
A-37	15189.2	557.58	32.6386	0.473492	1.27771	0.05854	6.7825	0.5857	7.54128	0.07258	3.3	0.899383	366.726	24.1789	468.102	28.2825	1001.79	66.9336	36.607
A-38	13358.8	128.123	30.2924	0.925113	0.086124	0.2323	6.93465	2.986	7.42485	0.09327	2.7	0.933977	1346.33	84.2585	1404.09	56.4774	1492.9	50.2105	90.1821
A-39	5957.63	24.8363	10.3871	0.964973	0.246863	0.3984	6.86404	7.136	8.01255	0.13	4.1	0.856661	2161.5	126.054	2128.53	71.3581	2096.83	72.6189	103.085
A-40	10894.2	37.3884	16.4248	0.568127	0.354877	0.4133	6.92376	8.255	7.36138	0.1449	2.5	0.940553	2230.11	130.53	2259.41	66.67	2286.06	43.0246	97.5526
A-41	3081.54	94.7593	10.0562	1.29108	1.32758	0.1073	6.82134	0.8916	8.47476	0.0603	5	0.8049	656.888	42.6012	647.214	40.5594	613.611	108.634	107.053
A-42	62198.2	118.943	74.6137	0.2492	0.0131936	0.5636	6.60042	15.74	6.89508	0.2026	2	0.957265	2881.59	153.372	2860.96	65.8285	2846.47	32.487	101.234
A-43	22276.1	851.332	72.829	0.899964	0	0.08642	7.07006	0.7263	7.73466	0.06097	3.1	0.914075	534.343	36.255	554.386	33.0426	637.58	67.4886	83.8079
A-44	12969.6	543.206	45.0214	0.438226	0.020995	0.08385	6.71161	0.6856	7.2702	0.05932	2.8	0.923167	519.065	33.4719	530.154	30.0257	578.178	60.729	89.776
A-45	26455.6	223.114	61.9506	0.433991	0.0680671	0.2727	6.72757	3.51	7.16719	0.09337	2.5	0.938662	1554.7	92.9366	1529.54	56.6393	1494.92	46.7609	103.999
A-46	12635.6	51.5427	22.6185	0.91608	0.208049	0.4172	6.82403	7.603	7.71962	0.1322	3.6	0.883984	2247.82	129.504	2185.21	69.2725	2126.94	63.1913	105.683
A-50	14533.3	498.667	47.6578	0.516444	0.0670637	0.09656	6.7844	0.8103	7.1812	0.06089	2.4	0.944745	594.189	38.5101	602.642	32.6387	634.569	50.6734	93.6367
A-51	130971	584.181	226.121	0.159911	0.0173711	0.37	6.97791	6.404	7.17717	0.1255	1.7	0.972238	2029.6	121.496	2032.79	63.0327	2036.03	29.7093	99.6843
A-52	8749.46	0.483157	0.0699234	0.486496	0.172059	0.1448	6.77223	1.444	7.65156	0.07235	3.6	0.885077	871.495	55.204	907.248	45.8993	995.315	72.3774	87.5597
A-53	6874.8	233.795	23.3175	0.790476	0.0999324	0.1007	6.67452	0.8615	7.3211	0.06209	3	0.911682	618.251	39.3482	630.943	34.4032	676.692	64.3055	91.3637
A-54	11236.4	309.8	38.7161	0.699441	0.0921569	0.1258	6.80366	1.122	7.30582	0.06466	2.7	0.931265	764.099	49.0239	763.758	39.2175	762.762	56.1076	100.175
A-55	8326.45	327.402	26.8762	0.229114	0.0462923	0.08294	6.6453	0.6953	7.00206	0.06082	2.2	0.94905	513.647	32.809	535.974	29.1594	632.153	47.5175	81.2536
A-56	13348.7	53.7417	21.4284	0.9226	0.0837656	0.3805	6.65215	6.693	6.99014	0.1276	2.1	0.951648	2078.81	118.204	2071.64	61.75	2064.52	37.863	100.692
A-57	4264.44	142.555	13.4739	0.850077	0.207403	0.09531	6.75034	0.8276	8.5437	0.06299	5.2	0.790096	586.893	37.8674	612.275	39.2837	707.319	111.391	82.9743
A-58	8086.21	181.682	24.4804	0.556196	0.0404293	0.1351	6.78109	1.289	8.06151	0.06921	4.4	0.841169	817.139	52.0429	840.971	46.099	904.424	89.8476	90.3491
A-59	5060.98	140.672	15.6266	0.515439	0	0.1116	7.08323	1.034	8.05164	0.06722	3.8	0.879725	682.084	45.8454	720.974	41.5627	843.94	79.6571	80.8215
A-60	26904.7	1174.53	79.5861	0.918683	4.33672	0.068	6.91646	0.6428	8.21653	0.06858	4.4	0.841773	424.086	28.3877	504.053	32.6452	885.625	91.6854	47.8855
A-61	3716.07	163.911	12.5405	0.349908	0.0806335	0.07749	6.75094	0.6193	7.99393	0.05797	4.3	0.844508	481.15	31.2995	489.389	31.0421	528.145	93.8218	91.1019
A-62	25606.5	721.917	70.2821	0.426008	0.911928	0.09767	6.96093	0.9271	7.88238	0.06886	3.7	0.8831	600.763	39.9292	666.091	38.5037	893.906	76.3469	67.2065
A-63	2976.51	49.1275	8.59126	0.37735	0	0.175	6.85396	1.736	8.37257	0.07196	4.8	0.818621	1039.47	65.7974	1021.86	53.9377	984.336	97.8896	105.601
A-64	4187.87	141.916	12.9955	1.2449	0.275755	0.09159	6.81733	0.9143	7.53668	0.07242	3.2	0.904553	564.917	36.873	659.323	36.5494	997.199	65.2856	56.6504
A-65	43962.9	98.2925	56.6217	0.768298	0.0379826	0.5257	6.64205	13.25	7.09304	0.1829	2.5	0.936418	2723.14	147.525	2697.68	66.9677	2678.66	41.1757	101.66
A-66	43757.3	199.929	79.4275	0.426212	0.00732822	0.3797	6.80845	6.585	7.14115	0.1258	2.2	0.953411	2074.94	120.791	2057.4	62.9509	2039.88	38.093	101.719
A-67	1526.63	71.1963	5.85189	0.558164	0	0.08335	7.35089	0.6504	11.2726	0.05661	8.5	0.6521	516.109	36.4597	508.747	45.1088	475.788	188.98	108.475
A-68	2575.42	121.001	9.53916	0.795041	0	0.07984	7.81648	0.6404	11.2402	0.0582	8.1	0.695404	495.144	37.2538	502.58	44.5578	536.581	176.766	92.2775
A-69	5677.05	189.555	18.134	0.309261	0.096454	0.09657	6.71355	0.8234	7.50431	0.06186	3.4	0.894626	594.271	38.113	609.966	34.4097	668.694	71.7715	88.8704
A-73	2224.79	79.7886	3.63544	0.749398	14.1841	0.04573	8.27532	0.4309	18.9799	0.06836	17	0.436004	288.268	23.3296	363.851	58.0398	879.007	353.439	32.7947
A-74	2546.08	78.5941	8.01343	1.18451	0.356249	0.1028	6.88699	0.9008	9.37838	0.06359	6.4	0.734348	630.599	41.3727	652.142	45.1277	727.422	134.953	86.6896
A-75	43176.4	468.479	111.492	0.311648	0.00638051	0.2352	7.17409	2.798	7.39427	0.08632	1.8	0.970222	1361.62	88.0567	1355.05	55.3128	1344.71	34.5886	101.257
A-76	83180.2	1.34461	0.170928	0.0666033	11.0304	0.1273	7.2776	1.25	9.22366	0.07126	5.7	0.789014	772.284	52.9676	823.423	52.0316	964.147	115.717	80.1002
A-77	14999.9	635.23	56.3904	0.481387	0.071847	0.08995	6.90888	0.7138	7.52706	0.05758	3	0.917872	555.228	36.7545	547.029	31.8338	513.023	65.6371	108.227
A-78	29085.6	206.681	40.7695	0.517514	0.555329	0.1911	8.23733	2.889	8.82594	0.1097	3.2	0.93331	1127.35	85.1968	1378.95	66.5713	1793.25	57.7049	62.8661
A-79	24022.6	103.188	42.2035	0.639506	0.0117558	0.3902	6.76537	6.891	6.96615	0.1281	1.7	0.971177	2123.58	122.402	2097.48	61.7692	2071.98	29.2536	102.49
A-80	6244.46	287.659	21.827	0.395471	0.0964865	0.07679	6.69458	0.6235	7.32528	0.0589	3	0.9139	476.958	30.7777	492.019	28.5644	562.756	64.7862	84.754
A-81	4261.45	193.585	15.2844	0.265715	0.11283	0.07992	6.67975	0.6466	8.45796	0.05869	5.2	0.789758	495.657	31.8678	506.364	33.7233	555.02	113.185	89.3044
A-82	5075.16	238.901	19.3151	0.205074	0.126718	0.08198	6.97194	0.6407	7.7931	0.0567	3.5	0.89463	507.956	34.055	502.768	30.9018	479.229	76.9519	105.994
A-83	78462.5	327.56	125.592	1.34934	0	0.3648	6.70379	6.603	7.03616	0.1313	2.1	0.952763	2004.88	115.511	2059.73	62.047	2115.08	37.4664	94.7901
A-84	4740.64	161.57	14.8705	0.0300323	0.15732	0.09318	6.88418	0.7517	8.35399	0.05853	4.7	0.824059	574.311	37.8266	569.206	36.4004	548.866	103.351	104.636
A-85	18028.7	446.999	59.8266	1.13573	0.0194667	0.1347	6.86834	1.218	7.32273	0.0656	2.5	0.937948	814.406	52.547	808.713	40.826	793.072	53.2655	102.69
A-86	11852.2	48.3871	19.7633	0.952239	0.0662343	0.3879	6.64519	7.133	7.36233	0.1334	3.2	0.902593	2113.28	119.735	2128.16	65.5641	2142.56	55.3977	98.6333
A-87	4576.03	184.343	16.0949	0.876799	0.186522	0.08839	6.70189	0.7132	8.2026	0.05853	4.7	0.817044	546.019	35.0867	546.616	34.6711	549.103	103.278	99.4384
A-88	80734	170.205	103.212	0.793064	0.0240779	0.5492	6.68539	14.56	6.97548	0.1923	2	0.958413	2821.99	152.787	2786.92	66.2759	2761.63	32.681	102.186
A-89	2679.39	98.8229	10.1335	0.435705	0	0.104	7.35627	0.8158	11.9883	0.05693	9.5	0.613623	637.575	44.6569	605.723	54.6906	488.286	208.869	130.574
A-90	61425.7	109.662	74.2959	1.03316	0	0.6064	6.76809	17.34	7.17286	0.2075	2.4	0.943569	3055.48	164.694	2954.09	68.8618	2885.76	38.565	105.881
A-91	9203.06	434.793	33.3342	0.124086	0.138508	0.07763	6.67265	0.6246	7.90118	0.05837	4.2	0.844513	481.95	30.9861	492.74	30.8451	543.207	92.4945	88.7231
A-92	10076.8	445.773	28.4006	0.118673	0.148614	0.06447	9.98783	0.5246	11.4055	0.05903	5.5	0.875701	402.766	38.9966	428.242	39.8507	567.754	119.884	70.9402
A-96	65838	58.0179	53.6388	0.62064	0.0420186	0.7552	6.82824	34.4	6.99228	0.3305	1.5	0.97654	3626.67	189.393	3621.61	68.9929	3618.82	23.0776	100.217
A-97	2767.14	94.7655	10.0036	0.827428	0.259963	0.1067	6.71172	0.8807	8.88941	0.05985	5.8	0.755024	653.821	41.7307	641.351	42.2675	597.673	126.247	109.394
A-98	47743.5	251.695	87.0959	0.447597	0.0696006	0.3317	6.77434	5.59	7.03998	0.1223	1.9	0.962268	1846.72	108.779	1914.56	60.6355	1988.86	34.0727	92.8531
A-99	4693.5	176.882	16.657	0.43424	0.0870049	0.09521	6.79354	0.788	7.86327	0.06004	4	0.863959	586.281	38.0718	590.04	35.1879	604.526	85.6646	96.982
A-100	31191.6	0.415175	0.0731076	0.542745	0.0430361	0.1751	6.77498	1.905	7.1451	0.0789	2.3	0.9482	1040.32	65.0885	1082.73	47.5731	1169.08	44.9477	88.9868
A-101	13853.3	807.983	55.0695	0.987017	0.0242794	0.0692	7.31819	0.5271	7.7129	0.05526	2.4	0.948825	431.339	30.5333	429.906	27.0328	422.232	54.364	102.157
A-102	5833.49	229.211	19.5424	1.02334	0.0525293	0.08555	7.03129	0.8109	8.04792	0.06877	3.9	0.873678	529.139	35.7192	602.945	36.5914	891.164	80.8625	59.3762
A-103	13661.5	371.105	45.0941	0.0313364	0.0475256	0.1223	6.85161	1.1	7.05968	0.06526	1.7	0.970527	743.763	48.1298	753.378	37.549	782.031	35.7508	95.1065
A-104	1754.81	69.1848	7.07713	2.01878	0	0.1037	6.78706	0.8152	11.0233	0.05703	8.7	0.615699	636.047	41.1076	605.346	50.2658	492.021	191.541	129.272
A-105	7400.03	334.602	25.0991	0.361738	0.0889562	0.07599	6.70658	0.606	7.68339	0.05785	3.7	0.872867	472.127	30.5318	481.009	29.4369	523.575	82.2287	90.1737
A-106	19685.9	781.862	70.2258	0.212036	0.0616363	0.09095	7.02834	0.7307	7.65809	0.05828	3	0.917767	561.166	37.7727	556.939	32.8286	539.699	66.5174	103.978
A-107	5432.59	186.668	19.3638	0.663766	0	0.1048	6.83126	0.8802	7.83857	0.06094	3.8	0.871492	642.467	41.7724	641.112	37.261	636.339	82.7247	100.963
A-108	3383.22	149.114	13.2285	0.259423	0.192625	0.08976	6.64254	0.7321	9.0136	0.05917	6.1	0.736946	554.138	35.2711	557.79	38.6837	572.719	132.52	96.7556
A-109	15291.6	690.914	54.6308	1.15243	0	0.08007	6.57676	0.6427	7.02789	0.05823	2.5	0.935808	496.551	31.4309	503.98	27.9195	537.847	54.2036	92.322
A-110	5068.65	208.001	18.3287	0.869197	0.194752	0.08929	6.76783	0.7081	7.47957	0.05753	3.2	0.904841	551.332	35.7621	543.604	31.4833	511.333	69.9884	107.823
A-111	1823.6	87.1329	6.97962	0.349272	0	0.08138	7.242	0.6119	10.4735	0.05454	7.6	0.691458	504.366	35.1339	484.732	40.3689	392.935	169.74	128.359
A-112	13930.7	115.547	32.1519	0.337312	0.13797	0.2728	6.7475	3.59	7.36746	0.09545	3	0.915852	1555.21	93.2391	1547.25	58.5088	1536.4	55.6595	101.224
A-113	9068.69	39.7974	16.7758	0.644887	0.438357	0.4043	6.97631	6.775	7.53646	0.1216	2.9	0.925675	2188.92	129.481	2082.46	66.6816	1978.79	50.7732	110.619
A-114	31979.8	152.665	55.6407	0.718954	0	0.3474	6.74899	6.189	7.02741	0.1293	2	0.960381	1921.94	112.162	2002.94	61.43	2087.56	34.4432	92.0662
A-115	6022.66	251.161	22.0167	0.569	0.0510006	0.08868	6.75073	0.7255	7.47803	0.05935	3.2	0.902742	547.74	35.4491	553.898	31.9252	579.295	69.8918	94.5527
A-119	4715.73	325.542	24.8127	0.559584	0.116907	0.07719	7.06316	0.619	7.89565	0.05818	3.5	0.894563	479.319	32.627	489.245	30.6534	535.995	77.2336	89.426
A-120	4343.48	198.587	16.1064	0.473121	0.117882	0.0821	6.92117	0.6639	8.26824	0.05867	4.5	0.837079	508.649	33.8514	516.997	33.498	554.064	98.6964	91.8033
A-121	4196.49	170.213	15.4404	0.510976	0.208427	0.09184	7.03876	0.741	7.89131	0.05853	3.6	0.891964	566.39	38.1656	562.974	34.1028	549.195	77.9084	103.131
A-122	4930.05	237.672	18.9409	0.275955	0	0.08081	6.86028	0.6319	7.86709	0.05673	3.9	0.872023	500.953	33.0654	497.264	30.9307	480.317	85.083	104.296
A-123	92003.4	786.648	203.317	0.547283	0	0.2504	6.91419	3.778	7.14086	0.1094	1.8	0.968257	1440.76	89.27	1588	57.3307	1789.41	32.5155	80.5163
A-124	39812.7	0.158789	0.0430921	0.668627	0	0.2632	6.85108	3.931	7.39412	0.1083	2.8	0.926559	1506.21	92.0226	1620.04	59.8521	1771.26	50.7806	85.0357
A-125	5417.05	226.767	20.0954	0.503103	0.119733	0.08978	6.72943	0.7138	7.66079	0.05768	3.7	0.878426	554.25	35.7395	547.028	32.3993	517.058	80.3823	107.193
A-126	10827.2	437.857	35.0691	0.668783	0.0819866	0.08088	6.73244	0.685	7.04271	0.06145	2.1	0.955944	501.361	32.4746	529.815	29.072	654.34	44.357	76.621
A-127	1774.64	60.4668	5.83085	0.918023	0.256409	0.09698	6.86236	0.8843	10.1992	0.06615	7.5	0.672835	596.659	39.1072	643.285	48.6	810.598	157.828	73.6073
A-128	4059.37	103.356	9.79609	1.01097	2.3346	0.09414	6.8037	1.043	8.75686	0.08041	5.5	0.776957	579.986	37.7375	725.626	45.4029	1206.48	108.577	48.0726
A-129	5249.34	207.703	20.1719	0.95125	0	0.09843	6.89374	0.7774	8.48324	0.0573	4.9	0.812631	605.2	39.8223	584.021	37.6758	502.508	108.822	120.436
A-130	4225.29	117.282	14.7658	0.95668	0	0.127	6.97003	1.093	7.9248	0.06241	3.8	0.879522	770.878	50.6421	749.871	42.0179	687.691	80.4673	112.097
A-131	3039.65	119.441	11.5899	0.793766	0.050853	0.09822	7.01929	0.7954	8.81707	0.05875	5.3	0.796102	603.962	40.4685	594.218	39.6617	557.193	116.36	108.394
A-132	2428.42	108.985	8.93906	0.50936	0.232003	0.08315	6.8422	0.6533	9.09858	0.057	6	0.752008	514.896	33.86	510.511	36.5062	490.921	132.274	104.884
A-133	2179.73	99.6113	8.50439	0.449348	0	0.08644	6.8885	0.6962	9.11214	0.05843	6	0.755969	534.459	35.3313	536.531	37.9765	545.35	130.341	98.003
A-134	3320.32	153.801	13.2439	0.361224	0	0.08736	7.10499	0.677	7.89437	0.05622	3.4	0.900008	539.881	36.7962	524.955	32.3594	460.554	76.2896	117.224
A-135	21966.7	0.106189	0.0242146	0.337151	0.00293314	0.2248	6.71766	2.761	6.97351	0.08911	1.9	0.963311	1307.23	79.4839	1345.17	51.9829	1406.03	35.8397	92.9728
A-136	16970.6	681.125	65.8873	0.555958	1.19253	0.09783	6.72307	0.8058	8.08809	0.05976	4.5	0.831231	601.66	38.6198	600.084	36.6461	594.132	97.4464	101.267
A-137	10851.2	51.7568	19.084	1.22809	0.917201	0.3556	6.86525	5.633	7.58575	0.1149	3.2	0.905019	1961.5	116.103	1921.23	65.4129	1878.04	58.151	104.444
A-138	4879.37	205.39	18.9372	0.535061	0	0.09346	7.35813	0.7353	8.60255	0.05708	4.5	0.855343	575.99	40.5438	559.688	37.0138	493.939	98.2422	116.612
A-142	163394	745.507	298.352	0.5954	0	0.3828	6.87901	6.585	7.28253	0.1248	2.4	0.944591	2089.53	122.769	2057.28	64.196	2025.12	42.3414	103.18
A-143	140974	1025.59	386.388	0.406079	0	0.3616	7.06442	6.026	7.34889	0.1209	2	0.96129	1989.59	120.933	1979.59	63.9988	1969.16	36.0994	101.038
A-144	3365.09	234.287	18.9971	0.136605	0	0.08217	6.81044	0.6501	8.06645	0.0574	4.3	0.844293	509.074	33.3365	508.554	32.2694	506.218	95.0882	100.564
A-145	3562.78	144.059	12.2582	0.376064	0.163773	0.08577	6.60495	0.7502	8.0805	0.06345	4.7	0.817394	530.501	33.6363	568.352	35.1693	722.836	98.7587	73.3916
A-146	48782.9	200.383	84.6305	0.278213	0.027958	0.3995	6.87127	7.613	7.00568	0.1382	1.4	0.980814	2166.96	126.455	2186.38	62.8755	2204.65	23.7083	98.2904
A-147	2798.81	98.718	10.2669	0.860813	0.20747	0.105	7.02728	0.8984	9.01504	0.06209	5.6	0.779506	643.428	43.0322	650.854	43.3183	676.693	120.713	95.0842
A-148	24592.6	116.587	38.8329	1.07253	0	0.3185	6.857	5.494	7.06206	0.1251	1.7	0.970962	1782.59	106.788	1899.66	60.665	2030.09	29.9076	87.8084
A-149	9886.57	85.0357	22.5275	1.13565	0.191596	0.2595	6.90872	3.457	7.77996	0.09664	3.6	0.888015	1487.27	91.7597	1517.41	61.2714	1559.72	67.1031	95.3551
A-150	15481.8	101.919	26.0465	0.777103	2.23137	0.2473	7.20922	3.79	7.94633	0.1112	3.3	0.907239	1424.36	92.1321	1590.63	63.841	1818.57	60.6697	78.3229
A-151	1939	74.8968	5.89018	0.960166	1.48309	0.07969	7.03901	0.6314	9.41996	0.05748	6.3	0.747244	494.289	33.4926	496.965	37.0187	509.309	137.633	97.0508
A-152	7509.05	207.665	26.1434	0.874232	0	0.1269	6.85193	1.108	7.52158	0.06332	3.1	0.91097	770.258	49.7464	757.092	40.1386	718.399	65.8678	107.219
A-153	3526.58	170.77	13.0106	0.420832	0.101239	0.0771	6.9207	0.6275	8.12612	0.05905	4.3	0.85166	478.772	31.9338	494.565	31.8145	568.369	92.6998	84.2361
A-154	6412.54	197.22	23.084	0.536774	0.0872384	0.1181	6.82868	1.008	7.89986	0.06188	4	0.864404	719.903	46.5143	707.776	40.2633	669.488	85.0096	107.53
A-155	3242.47	128.103	11.6697	0.678537	0.35188	0.09229	6.76774	0.734	9.56407	0.05769	6.8	0.707621	569.088	36.8634	558.873	41.106	517.486	148.371	109.972
A-156	25108.9	127.622	48.4413	0.574623	0.088207	0.3645	6.85138	6.042	7.22936	0.1203	2.3	0.947716	2003.32	117.976	1981.89	62.9814	1959.6	41.1749	102.231
A-157	23093.8	192.474	49.5587	0.641135	0.221344	0.2515	6.85165	3.459	7.37225	0.09976	2.7	0.929384	1446.44	88.7735	1517.91	58.0687	1619.06	50.6503	89.3382
A-158	7652.58	321.903	26.7338	1.62888	0	0.08396	6.81244	0.6953	7.56148	0.06007	3.3	0.900941	519.745	34.0176	535.972	31.4889	605.635	70.9747	85.8182
A-159	332727	796.007	516.189	0.414232	0	0.5976	6.89496	14.04	7.06992	0.1704	1.6	0.975252	3020.35	166.27	2752.41	67.0137	2561.39	26.1532	117.918
A-160	4894.82	197.599	17.3723	0.832925	0.0460688	0.08897	6.80405	0.7242	7.56119	0.05905	3.3	0.899865	549.421	35.8341	553.124	32.2463	568.4	71.784	96.6609
A-161	24802.5	103.402	42.9616	0.729945	0.0292373	0.3946	6.75353	7.253	7.1825	0.1333	2.4	0.940275	2144.34	123.195	2143.06	64.0933	2141.83	42.7395	100.117
A-165	18446.5	74.1826	32.1186	0.612582	0.131185	0.4119	6.65126	7.464	6.93051	0.1315	1.9	0.959708	2223.55	125.084	2168.71	62.0573	2117.2	34.1355	105.024
A-166	3314.85	147.963	12.3403	0.684306	0.210217	0.08443	6.74646	0.6826	8.09551	0.05866	4.5	0.833358	522.488	33.8588	528.337	33.3469	553.688	97.6392	94.365
A-167	4700.64	214.238	17.2526	0.851721	0.130446	0.08157	6.75246	0.6518	8.3505	0.05797	4.9	0.808629	505.478	32.8283	509.595	33.4584	528.115	107.665	95.7136
A-168	62654.8	123.674	79.251	1.05015	0.00920589	0.5737	6.7396	16.39	7.09454	0.2072	2.2	0.949969	2922.83	158.378	2899.63	67.8936	2883.57	35.9818	101.362
A-169	62764.7	162.7	87.0011	0.536864	0.0246903	0.4906	6.67185	11.9	6.83441	0.176	1.5	0.976214	2573.35	141.56	2596.92	64.0178	2615.35	24.6624	98.394
A-170	5604.96	203.4	19.5235	0.925543	0.189173	0.09695	6.71778	0.8175	8.36209	0.06117	5	0.803361	596.512	38.2742	606.633	38.1899	644.625	107.012	92.5362
A-171	45844.4	307.465	87.8149	0.267941	0.071405	0.2743	6.71589	4.535	6.95893	0.1199	1.8	0.965076	1562.72	93.1981	1737.38	57.8934	1954.63	32.556	79.9495
A-172	1655.2	58.9229	5.15963	0.909171	0.566893	0.08862	7.11457	0.7197	9.92487	0.05892	6.9	0.716843	547.377	37.336	550.513	42.1762	563.511	150.746	97.1368
A-173	5371.49	230.68	17.0398	0.323138	0	0.07484	6.96186	0.5944	7.86744	0.05762	3.7	0.884895	465.274	31.2504	473.676	29.7815	514.583	80.4968	90.4175
A-174	30613.7	414.684	80.8065	0.562983	0	0.1932	6.90023	2.204	7.03398	0.08278	1.4	0.980985	1138.44	72.0096	1182.34	49.1311	1263.58	26.6679	90.0964
EC-PO-66 (Rims only)
A-77	15922.6	413.289	45.5723	0.207747	0.11143	0.1112	3.46993	0.9612	11.0903	0.0627	11	0.312879	679.868	22.3896	683.926	55.1912	697.303	224.41	97.4996
A-78	14670.2	525.842	58.6887	0.229977	1.39784	0.1126	3.50412	0.9684	10.7146	0.06238	10	0.327042	687.891	22.863	687.614	53.5225	686.709	216.09	100.172
A-85	405030	1035.59	588.808	0.0489496	0.336096	0.5154	3.35357	13.59	3.66349	0.1913	1.5	0.915403	2679.55	73.5242	2721.72	34.6493	2753.18	24.2288	97.3255
A-86	537447	0.997987	0.725763	0.131338	0.802481	0.6461	3.75059	19.32	4.14266	0.2169	1.8	0.905358	3213.12	94.9029	3058.02	39.994	2957.66	28.381	108.637
A-87	534.934	9.70397	1.10375	0.844202	0	0.113	9.4254	1.256	16.8361	0.08066	14	0.559834	689.87	61.6646	825.999	95.1664	1212.5	274.516	56.8967
A-88	277860	1.1752	0.0790025	0.18628	1.43416	0.06305	19.1919	1.292	19.3011	0.1487	2.1	0.994343	394.178	73.3838	842.262	110.48	2330.2	35.1139	16.916
A-89	50263.6	716.369	229.133	0.184638	0.930077	0.3099	3.56402	4.681	4.20806	0.1096	2.2	0.846951	1740.19	54.3546	1763.79	35.2063	1791.86	40.7446	97.1165
A-90	85453.8	0.293202	0.147288	0.18421	0.874511	0.4632	3.9288	10.85	5.43489	0.1699	3.8	0.722885	2453.54	80.1721	2510.05	50.5266	2556.08	62.8641	95.9884
A-91	259945	829.058	363.054	0.0277337	0.0355832	0.414	3.65372	7.936	4.04936	0.1391	1.7	0.902296	2233.14	68.96	2223.79	36.5153	2215.19	30.2707	100.81
A-92	105650	0.329219	0.126399	0.131906	0.828706	0.3569	3.1474	7.857	4.00925	0.1597	2.5	0.785036	1967.51	53.3677	2214.74	36.1129	2452.03	42.0069	80.2399
a within-run background-corrected mean 207Pb signal in counts per second
b U and Pb content and Th/U ratio were calculated relative to GJ-1 and are accurate to approximately 10%.
c corrected for background, mass bias, laser induced U-Pb fractionation and common Pb (if detectable, see analytical method) using
Stacey & Kramers (1975) model Pb composition. 207Pb/235U calculated using 207Pb/206Pb/(238U/206Pb × 1/137.88). Errors are
propagated by quadratic addition of within-run errors (2SE) and the reproducibility of GJ-1 (2SD).
d Rho is the error correlation defined as err206Pb/238U/err207Pb/235U.
