# Supplementary material for: A tectonic carpet of Variscan flysch at the base of a rootless accretionary prism in northwestern Iberia: U–Pb zircon age constrains from sediments and volcanic olistoliths
Source: Copernicus journal article supplement (doi:10.5194/se-12-835-2021), 2021-04-15
Supplement: Supplementary file 5 [file se-12-835-2021-supplement.zip › SUPP TABLES/Supplementary Table 6_AD-PO-48B.xls]

## Sheet: PlotDat4
Source sheet	all data	0.414542	0.0566687	0	0	0.217708	0.0315113	0.468568	0.0630913	0.504114	0.0670592	0.829913	0.0986994	0.821259	0.0996753	0.837056	0.102152	0.85701	0.10323	0.903144	0.109365	0.929631	0.111181	0.958597	0.111347	0.956911	0.112962	0.974301	0.113638	1.01837	0.118713	1.03261	0.118077	1.04977	0.11996	1.02419	0.118855	1.0441	0.12144	1.08593	0.122808	1.03431	0.123119	1.08417	0.123395	1.06121	0.12413	1.05426	0.124875
Plot name	Concordia0	0.447493	0.0599438	0.110692	0.0166736	0.482812	0.0640155	0.466297	0.0635261	0.501757	0.0672815	0.825455	0.0997539	0.817342	0.100193	0.832995	0.102926	0.85274	0.104172	0.898978	0.109735	0.925101	0.111979	0.953987	0.112163	0.952468	0.113132	0.969594	0.1145	1.01369	0.11903	1.02681	0.119836	1.04484	0.120497	1.01881	0.120279	1.03925	0.12184	1.08063	0.123689	1.02936	0.123764	1.07907	0.123897	1.05628	0.12446	1.0493	0.125406
Plot Type	1	0.723393	0.0883647	0.233637	0.0336251	0.805631	0.097544	0.459833	0.0634054	0.495003	0.0669094	0.812729	0.0998858	0.806118	0.0998204	0.821392	0.102802	0.840549	0.104204	0.887007	0.109145	0.912144	0.111786	0.940787	0.112004	0.939652	0.112292	0.956123	0.114365	1.00021	0.118301	1.01025	0.120563	1.03064	0.119967	1.00345	0.120659	1.02528	0.121163	1.06541	0.12347	1.01516	0.123305	1.06437	0.123295	1.04206	0.123684	1.03505	0.124825
1st free col	131	0.727148	0.0892106	0.370191	0.0508594	1.19873	0.132129	0.4497	0.062739	0.4844	0.0659729	0.792765	0.0990843	0.788497	0.0985885	0.803188	0.101792	0.821424	0.103325	0.868201	0.107643	0.891808	0.11062	0.920068	0.110882	0.9195	0.110508	0.93498	0.113245	0.979022	0.116586	0.984259	0.120197	1.00834	0.118412	0.979343	0.119964	1.00334	0.119463	1.04152	0.122167	0.992872	0.121779	1.04129	0.121637	1.01972	0.121864	1.01268	0.12318
Sigma Level	2	0.739907	0.0918501	0.521861	0.0683809	1.67741	0.167804	0.436718	0.0615807	0.470807	0.064548	0.767181	0.0974143	0.765905	0.0965969	0.779857	0.0999752	0.796915	0.101606	0.844084	0.10535	0.865742	0.108574	0.893508	0.108888	0.893646	0.107925	0.907876	0.11123	0.951846	0.114023	0.950947	0.118769	0.97974	0.115959	0.948451	0.118251	0.975192	0.116878	1.01089	0.119887	0.964294	0.11931	1.01168	0.119059	0.991061	0.119148	0.983982	0.120603
Absolute Errs	FALSE	0.754965	0.0929539	0.690319	0.0861946	2.2603	0.204603	0.42194	0.0600245	0.455326	0.0627501	0.73805	0.0950113	0.740174	0.0940069	0.753289	0.0975007	0.769007	0.0991863	0.81661	0.102452	0.836057	0.105815	0.863258	0.106184	0.864185	0.104753	0.877008	0.108484	0.920883	0.11082	0.913012	0.116394	0.947158	0.112807	0.913275	0.115658	0.943123	0.113619	0.976004	0.116815	0.931742	0.116099	0.977943	0.115768	0.958406	0.115755	0.951294	0.117305
Symbol Type	1	0.802642	0.0978842	0.877425	0.104305	2.97009	0.242562	0.406563	0.0581965	0.439209	0.0607248	0.707731	0.0920697	0.713387	0.0910283	0.725638	0.0945684	0.739962	0.0962613	0.788004	0.0991848	0.805159	0.102565	0.831769	0.102988	0.833502	0.101248	0.844878	0.105229	0.888639	0.107236	0.873527	0.113264	0.913234	0.109211	0.876663	0.112396	0.909731	0.109947	0.939686	0.113198	0.897854	0.112404	0.942818	0.112032	0.924401	0.111961	0.917262	0.11355
Inverse Plot	FALSE	0.821073	0.0997645	1.08524	0.122718	3.83441	0.281716	0.391832	0.0562446	0.423764	0.0586363	0.678681	0.088828	0.687715	0.0879025	0.699142	0.0914158	0.712132	0.0930684	0.760584	0.0958118	0.775549	0.099089	0.801593	0.0995603	0.804084	0.0976951	0.814087	0.101729	0.857728	0.103562	0.835692	0.109634	0.880715	0.105461	0.841582	0.108727	0.87772	0.106162	0.904878	0.109331	0.865376	0.108526	0.909147	0.108154	0.891802	0.108073	0.884641	0.109645
Color Plot	TRUE	0.847967	0.10012	1.31606	0.141438	4.8869	0.322105	0.37894	0.0543272	0.410242	0.0566537	0.653253	0.0855487	0.665238	0.0848826	0.675949	0.0882984	0.687772	0.0898662	0.736571	0.0926067	0.749628	0.0956673	0.775174	0.0961777	0.778314	0.0943811	0.78713	0.0982669	0.830653	0.100096	0.802571	0.105797	0.852237	0.101863	0.810875	0.104951	0.849684	0.10257	0.8744	0.105526	0.836937	0.104779	0.879658	0.104446	0.863249	0.104405	0.856075	0.105905
3D plot	FALSE	0.849112	0.100649	1.57243	0.16047	6.16853	0.363766	0.368933	0.0525994	0.399737	0.0549376	0.633508	0.0824976	0.647777	0.0822134	0.657938	0.0854688	0.668856	0.0869142	0.717911	0.0898292	0.729495	0.0925774	0.754651	0.0931145	0.758279	0.0915749	0.766191	0.0951236	0.809608	0.0971185	0.776847	0.102065	0.830106	0.0987068	0.787028	0.101373	0.827894	0.0994616	0.850723	0.102092	0.814843	0.101466	0.856739	0.10121	0.841054	0.101256	0.833878	0.102634
Linear	FALSE	0.861415	0.102202	1.85718	0.179819	7.72917	0.40674	0.362621	0.0512013	0.393101	0.0536271	0.621044	0.0799218	0.636745	0.080111	0.646567	0.0831561	0.656916	0.0844514	0.706115	0.0877042	0.716781	0.0900699	0.741689	0.0906188	0.745603	0.0895038	0.752967	0.0925538	0.796298	0.0948702	0.760606	0.0987384	0.816115	0.0962489	0.771973	0.0982819	0.814116	0.0970888	0.835763	0.0993071	0.800883	0.0988553	0.842249	0.0987087	0.827018	0.0988796	0.819849	0.100096
Data Range	AC3:AG63	0.905084	0.106123	2.17345	0.199491	9.62957	0.451068	0.360515	0.0502461	0.390871	0.0528283	0.616873	0.07803	0.633038	0.0787458	0.642758	0.0815478	0.652919	0.0826775	0.70214	0.0864039	0.712516	0.0883477	0.737337	0.0888928	0.741313	0.0883356	0.748528	0.0907656	0.791801	0.0935335	0.755161	0.0960882	0.811399	0.0946884	0.766931	0.095929	0.809465	0.095644	0.830734	0.0973966	0.796187	0.097159	0.83736	0.0971434	0.822276	0.0974691	0.815123	0.0984964
Filled Symbols	FALSE	0.893884	0.107082	2.52472	0.21949	11.9437	0.496793	0.362786	0.0498113	0.393229	0.052606	0.62133	0.0769754	0.636955	0.0782284	0.646819	0.0807741	0.65719	0.0817361	0.706306	0.0860337	0.717046	0.0875505	0.741947	0.0880764	0.745756	0.088165	0.753235	0.0899039	0.796481	0.0932168	0.760955	0.0943286	0.816338	0.0941515	0.77231	0.0945048	0.814319	0.095244	0.836041	0.0965154	0.801138	0.0965143	0.842469	0.0966415	0.827212	0.0971386	0.820084	0.0979657
ConcAge	FALSE	0.930587	0.107324	2.91488	0.239824	14.7617	0.543959	0.36925	0.049932	0.399983	0.0529782	0.634057	0.0768435	0.648178	0.0786007	0.658422	0.0808977	0.669381	0.0817035	0.718277	0.0866236	0.730003	0.0877428	0.755147	0.0882357	0.758573	0.0890056	0.766706	0.0900385	0.80996	0.0939458	0.777518	0.0936023	0.830533	0.0946818	0.787673	0.0941247	0.828284	0.0959214	0.851256	0.0967349	0.815333	0.0969733	0.857161	0.0972437	0.841427	0.0979147	0.834329	0.0985465
ConcSwap	FALSE	0.89556	0.107392	3.34823	0.260496	18.1931	0.592611	0.379384	0.0505985	0.410586	0.0539147	0.65402	0.077645	0.6658	0.0798326	0.676627	0.0819086	0.688506	0.0825824	0.737083	0.0881257	0.750339	0.088909	0.775866	0.0893578	0.778724	0.0907896	0.78785	0.0911585	0.831146	0.0956613	0.803508	0.093968	0.852833	0.0962363	0.811777	0.0948193	0.850228	0.0976213	0.875146	0.0980374	0.837622	0.098499	0.880247	0.0989011	0.86377	0.0997348	0.856706	0.100192
1st Symbol-row	1	0.926784	0.108542	3.82955	0.281513	IsoLine	IsoLine	0.392365	0.0517567	0.424179	0.0553396	0.679604	0.079315	0.688391	0.0818242	0.699958	0.0837249	0.713015	0.0843015	0.7612	0.0904185	0.776405	0.0909546	0.802426	0.0913518	0.804578	0.0933722	0.814953	0.0931732	0.858321	0.0982244	0.83682	0.0953962	0.881433	0.0986891	0.842669	0.0965325	0.878375	0.100206	0.905775	0.100317	0.8662	0.100968	0.909857	0.10148	0.892429	0.102451	0.8854	0.102768
		0.958333	0.110102	4.36414	0.30288			0.407143	0.0533129	0.43966	0.0571375	0.708736	0.0817181	0.714123	0.0844142	0.726525	0.0861994	0.740923	0.0867216	0.788674	0.093316	0.80609	0.093714	0.832676	0.0940561	0.834039	0.0965444	0.845821	0.0959193	0.889285	0.101427	0.874755	0.0977712	0.914015	0.101841	0.877846	0.0991255	0.910444	0.103466	0.940662	0.10339	0.898751	0.104179	0.943591	0.10477	0.925084	0.105844	0.918087	0.106067
		0.915247	0.110139	4.95791	0.324604			0.422521	0.055141	0.455776	0.0591628	0.739054	0.0846596	0.740909	0.0873928	0.754177	0.0891318	0.769968	0.0896465	0.81728	0.0965836	0.836988	0.0969636	0.864164	0.0972517	0.864722	0.100049	0.877952	0.0991744	0.921528	0.105011	0.91424	0.1009	0.947939	0.105438	0.914457	0.102388	0.943836	0.107137	0.976981	0.107006	0.932639	0.107874	0.978716	0.108506	0.959088	0.109638	0.95212	0.109821
		0.960767	0.110269	5.6174	0.34669			0.437252	0.0570928	0.471221	0.0612513	0.768104	0.0879014	0.766581	0.0905187	0.780672	0.0922843	0.797798	0.0928395	0.8447	0.0999567	0.866598	0.10044	0.894341	0.10068	0.89414	0.103602	0.908743	0.102675	0.95244	0.108685	0.952075	0.104531	0.980458	0.109187	0.949538	0.106056	0.975847	0.110922	1.01179	0.110874	0.965118	0.111752	1.01239	0.112385	0.991688	0.113526	0.984741	0.113726
		0.941745	0.110799	6.3499	0.369144			0.450143	0.0590103	0.484744	0.0632339	0.793532	0.0911806	0.789058	0.0935385	0.803865	0.0954017	0.822157	0.0960417	0.868713	0.103162	0.892519	0.103862	0.92076	0.104062	0.91991	0.106916	0.9357	0.106137	0.979515	0.112151	0.985196	0.108367	1.00894	0.112786	0.980246	0.109832	1.00388	0.114514	1.04227	0.114678	0.993556	0.115499	1.04188	0.116092	1.02024	0.117194	1.01331	0.117466
		0.934691	0.111686	7.16348	0.391972			0.46015	0.060738	0.495249	0.06495	0.813278	0.0942317	0.80652	0.0962078	0.821877	0.0982313	0.841073	0.0989937	0.887373	0.105939	0.912652	0.106952	0.941282	0.107125	0.939945	0.109722	0.956638	0.10928	1.00056	0.115129	1.01092	0.1121	1.03107	0.115942	1.00409	0.113411	1.02567	0.117623	1.06594	0.118112	1.01565	0.118812	1.06479	0.119328	1.04244	0.120343	1.0355	0.120738
		0.959104	0.11226	8.06711	0.415182			0.466462	0.0621361	0.501885	0.0662605	0.825741	0.0968075	0.817552	0.0983102	0.833248	0.100544	0.853014	0.101456	0.899169	0.108064	0.925366	0.109459	0.954245	0.109621	0.952621	0.111794	0.969863	0.11185	1.01387	0.117377	1.02716	0.115426	1.04506	0.1184	1.01915	0.116502	1.03945	0.119996	1.0809	0.120898	1.02961	0.121423	1.07929	0.12183	1.05647	0.122719	1.04953	0.123276
		0.995208	0.113766	9.07077	0.438778			0.468568	0.0630913	0.504114	0.0670592	0.829913	0.0986994	0.821259	0.0996753	0.837056	0.102152	0.85701	0.10323	0.903144	0.109365	0.929631	0.111181	0.958597	0.111347	0.956911	0.112962	0.974301	0.113638	1.01837	0.118713	1.03261	0.118077	1.04977	0.11996	1.02419	0.118855	1.0441	0.12144	1.08593	0.122808	1.03431	0.123119	1.08417	0.123395	1.06121	0.12413	1.05426	0.124875
		1.01706	0.113878	10.1855	0.462767
		0.991188	0.116185	11.4237	0.487157
		1.00746	0.116293	12.7989	0.511953
		1.05845	0.118556	14.3263	0.537163
		1.05042	0.118736	16.0228	0.562793
		1.04195	0.119064	17.9071	0.58885
		1.03008	0.120253	20	0.615342
		1.04173	0.121832	20	0.615342
		1.07907	0.121887	IsoLine	IsoLine
		1.06831	0.123506
		1.08382	0.125471
		1.16945	0.128893
		1.22619	0.130794
		1.21332	0.13448
		1.37681	0.143793
		1.33651	0.146203
		1.38516	0.147605
		1.74415	0.175966
		1.69245	0.169613
		1.74917	0.173715
		1.89996	0.181795
		3.17187	0.246774
		3.93297	0.297803
		4.5611	0.314754
		4.80694	0.3046
		5.34181	0.327387
		6.54387	0.39073
		5.82798	0.347042
		6.78209	0.389679
		10.0524	0.449723
		9.69271	0.428782
		11.3577	0.486281
		11.059	0.463226
		12.6518	0.521774
		12.9532	0.533813
		11.9488	0.484183
		14.1483	0.56219
		13.4126	0.527097
		IsoLine	IsoLine
[truncated: 80 more columns]

## Sheet: PlotDat0
Source sheet	all data	0.414542	0.0566687	0	0	0.217708	0.0315113	0.468568	0.0630913	0.504114	0.0670592	0.829913	0.0986994	0.821259	0.0996753	0.837056	0.102152	0.85701	0.10323	0.903144	0.109365	0.929631	0.111181	0.958597	0.111347	0.956911	0.112962	0.974301	0.113638	1.01837	0.118713	1.03261	0.118077	1.04977	0.11996	1.02419	0.118855	1.0441	0.12144	1.08593	0.122808	1.03431	0.123119	1.08417	0.123395	1.06121	0.12413	1.05426	0.124875
Plot name	Concordia0	0.447493	0.0599438	0.0558399	0.00859534	0.482812	0.0640155	0.466297	0.0635261	0.501757	0.0672815	0.825455	0.0997539	0.817342	0.100193	0.832995	0.102926	0.85274	0.104172	0.898978	0.109735	0.925101	0.111979	0.953987	0.112163	0.952468	0.113132	0.969594	0.1145	1.01369	0.11903	1.02945	0.119464	1.04484	0.120497	1.02125	0.119998	1.03925	0.12184	1.08063	0.123689	1.02936	0.123764	1.07907	0.123897	1.05628	0.12446	1.0493	0.125406
Plot Type	1	0.723393	0.0883647	0.114798	0.0172646	0.805631	0.097544	0.459833	0.0634054	0.495003	0.0669094	0.812729	0.0998858	0.806118	0.0998204	0.821392	0.102802	0.840549	0.104204	0.887007	0.109145	0.912144	0.111786	0.940787	0.112004	0.939652	0.112292	0.956123	0.114365	1.00021	0.118301	1.02036	0.120309	1.03064	0.119967	1.01283	0.12059	1.02528	0.121163	1.06541	0.12347	1.01516	0.123305	1.06437	0.123295	1.04206	0.123684	1.03505	0.124825
1st free col	131	0.727148	0.0892106	0.177048	0.0260083	1.19873	0.132129	0.4497	0.062739	0.4844	0.0659729	0.792765	0.0990843	0.788497	0.0985885	0.803188	0.101792	0.821424	0.103325	0.868201	0.107643	0.891808	0.11062	0.920068	0.110882	0.9195	0.110508	0.93498	0.113245	0.979022	0.116586	1.00575	0.120577	1.00834	0.118412	0.999272	0.120606	1.00334	0.119463	1.04152	0.122167	0.992872	0.121779	1.04129	0.121637	1.01972	0.121864	1.01268	0.12318
Sigma Level	2	0.739907	0.0918501	0.242774	0.0348272	1.67741	0.167804	0.436718	0.0615807	0.470807	0.064548	0.767181	0.0974143	0.765905	0.0965969	0.779857	0.0999752	0.796915	0.101606	0.844084	0.10535	0.865742	0.108574	0.893508	0.108888	0.893646	0.107925	0.907876	0.11123	0.951846	0.114023	0.986246	0.120255	0.97974	0.115959	0.981186	0.120043	0.975192	0.116878	1.01089	0.119887	0.964294	0.11931	1.01168	0.119059	0.991061	0.119148	0.983982	0.120603
Absolute Errs	FALSE	0.754965	0.0929539	0.31217	0.0437219	2.2603	0.204603	0.42194	0.0600245	0.455326	0.0627501	0.73805	0.0950113	0.740174	0.0940069	0.753289	0.0975007	0.769007	0.0991863	0.81661	0.102452	0.836057	0.105815	0.863258	0.106184	0.864185	0.104753	0.877008	0.108484	0.920883	0.11082	0.962708	0.119357	0.947158	0.112807	0.959357	0.118928	0.943123	0.113619	0.976004	0.116815	0.931742	0.116099	0.977943	0.115768	0.958406	0.115755	0.951294	0.117305
Symbol Type	1	0.802642	0.0978842	0.385442	0.0526931	2.97009	0.242562	0.406563	0.0581965	0.439209	0.0607248	0.707731	0.0920697	0.713387	0.0910283	0.725638	0.0945684	0.739962	0.0962613	0.788004	0.0991848	0.805159	0.102565	0.831769	0.102988	0.833502	0.101248	0.844878	0.105229	0.888639	0.107236	0.936161	0.117923	0.913234	0.109211	0.93474	0.117309	0.909731	0.109947	0.939686	0.113198	0.897854	0.112404	0.942818	0.112032	0.924401	0.111961	0.917262	0.11355
Inverse Plot	FALSE	0.821073	0.0997645	0.462805	0.0617413	3.83441	0.281716	0.391832	0.0562446	0.423764	0.0586363	0.678681	0.088828	0.687715	0.0879025	0.699142	0.0914158	0.712132	0.0930684	0.760584	0.0958118	0.775549	0.099089	0.801593	0.0995603	0.804084	0.0976951	0.814087	0.101729	0.857728	0.103562	0.907767	0.116015	0.880715	0.105461	0.908411	0.115257	0.87772	0.106162	0.904878	0.109331	0.865376	0.108526	0.909147	0.108154	0.891802	0.108073	0.884641	0.109645
Color Plot	TRUE	0.847967	0.10012	0.544488	0.0708673	IsoLine	IsoLine	0.37894	0.0543272	0.410242	0.0566537	0.653253	0.0855487	0.665238	0.0848826	0.675949	0.0882984	0.687772	0.0898662	0.736571	0.0926067	0.749628	0.0956673	0.775174	0.0961777	0.778314	0.0943811	0.78713	0.0982669	0.830653	0.100096	0.878766	0.113717	0.852237	0.101863	0.881521	0.11286	0.849684	0.10257	0.8744	0.105526	0.836937	0.104779	0.879658	0.104446	0.863249	0.104405	0.856075	0.105905
3D plot	FALSE	0.849112	0.100649	0.630731	0.0800718			0.368933	0.0525994	0.399737	0.0549376	0.633508	0.0824976	0.647777	0.0822134	0.657938	0.0854688	0.668856	0.0869142	0.717911	0.0898292	0.729495	0.0925774	0.754651	0.0931145	0.758279	0.0915749	0.766191	0.0951236	0.809608	0.0971185	0.850426	0.111128	0.830106	0.0987068	0.855243	0.110225	0.827894	0.0994616	0.850723	0.102092	0.814843	0.101466	0.856739	0.10121	0.841054	0.101256	0.833878	0.102634
Linear	FALSE	0.861415	0.102202	0.721791	0.0893554			0.362621	0.0512013	0.393101	0.0536271	0.621044	0.0799218	0.636745	0.080111	0.646567	0.0831561	0.656916	0.0844514	0.706115	0.0877042	0.716781	0.0900699	0.741689	0.0906188	0.745603	0.0895038	0.752967	0.0925538	0.796298	0.0948702	0.823985	0.108363	0.816115	0.0962489	0.830728	0.107466	0.814116	0.0970888	0.835763	0.0993071	0.800883	0.0988553	0.842249	0.0987087	0.827018	0.0988796	0.819849	0.100096
Data Range	AC3:AG63	0.905084	0.106123	0.817936	0.0987188			0.360515	0.0502461	0.390871	0.0528283	0.616873	0.07803	0.633038	0.0787458	0.642758	0.0815478	0.652919	0.0826775	0.70214	0.0864039	0.712516	0.0883477	0.737337	0.0888928	0.741313	0.0883356	0.748528	0.0907656	0.791801	0.0935335	0.800599	0.105542	0.811399	0.0946884	0.809047	0.104703	0.809465	0.095644	0.830734	0.0973966	0.796187	0.097159	0.83736	0.0971434	0.822276	0.0974691	0.815123	0.0984964
Filled Symbols	FALSE	0.893884	0.107082	0.919449	0.108163			0.362786	0.0498113	0.393229	0.052606	0.62133	0.0769754	0.636955	0.0782284	0.646819	0.0807741	0.65719	0.0817361	0.706306	0.0860337	0.717046	0.0875505	0.741947	0.0880764	0.745756	0.088165	0.753235	0.0899039	0.796481	0.0932168	0.78129	0.102788	0.816338	0.0941515	0.791146	0.102058	0.814319	0.095244	0.836041	0.0965154	0.801138	0.0965143	0.842469	0.0966415	0.827212	0.0971386	0.820084	0.0979657
ConcAge	FALSE	0.930587	0.107324	1.02663	0.117688			0.36925	0.049932	0.399983	0.0529782	0.634057	0.0768435	0.648178	0.0786007	0.658422	0.0808977	0.669381	0.0817035	0.718277	0.0866236	0.730003	0.0877428	0.755147	0.0882357	0.758573	0.0890056	0.766706	0.0900385	0.80996	0.0939458	0.766902	0.100222	0.830533	0.0946818	0.777809	0.0996465	0.828284	0.0959214	0.851256	0.0967349	0.815333	0.0969733	0.857161	0.0972437	0.841427	0.0979147	0.834329	0.0985465
ConcSwap	FALSE	0.89556	0.107392	1.1398	0.127295			0.379384	0.0505985	0.410586	0.0539147	0.65402	0.077645	0.6658	0.0798326	0.676627	0.0819086	0.688506	0.0825824	0.737083	0.0881257	0.750339	0.088909	0.775866	0.0893578	0.778724	0.0907896	0.78785	0.0911585	0.831146	0.0956613	0.758064	0.0979556	0.852833	0.0962363	0.769618	0.0975732	0.850228	0.0976213	0.875146	0.0980374	0.837622	0.098499	0.880247	0.0989011	0.86377	0.0997348	0.856706	0.100192
1st Symbol-row	1	0.926784	0.108542	1.25928	0.136984			0.392365	0.0517567	0.424179	0.0553396	0.679604	0.079315	0.688391	0.0818242	0.699958	0.0837249	0.713015	0.0843015	0.7612	0.0904185	0.776405	0.0909546	0.802426	0.0913518	0.804578	0.0933722	0.814953	0.0931732	0.858321	0.0982244	0.755161	0.0960882	0.881433	0.0986891	0.766931	0.095929	0.878375	0.100206	0.905775	0.100317	0.8662	0.100968	0.909857	0.10148	0.892429	0.102451	0.8854	0.102768
		0.958333	0.110102	1.38544	0.146757			0.407143	0.0533129	0.43966	0.0571375	0.708736	0.0817181	0.714123	0.0844142	0.726525	0.0861994	0.740923	0.0867216	0.788674	0.093316	0.80609	0.093714	0.832676	0.0940561	0.834039	0.0965444	0.845821	0.0959193	0.889285	0.101427	0.758321	0.0947012	0.914015	0.101841	0.769866	0.0947858	0.910444	0.103466	0.940662	0.10339	0.898751	0.104179	0.943591	0.10477	0.925084	0.105844	0.918087	0.106067
		0.915247	0.110139	1.51864	0.156614			0.422521	0.055141	0.455776	0.0591628	0.739054	0.0846596	0.740909	0.0873928	0.754177	0.0891318	0.769968	0.0896465	0.81728	0.0965836	0.836988	0.0969636	0.864164	0.0972517	0.864722	0.100049	0.877952	0.0991744	0.921528	0.105011	0.767407	0.0938555	0.947939	0.105438	0.778295	0.0941936	0.943836	0.107137	0.976981	0.107006	0.932639	0.107874	0.978716	0.108506	0.959088	0.109638	0.95212	0.109821
		0.960767	0.110269	1.65929	0.166555			0.437252	0.0570928	0.471221	0.0612513	0.768104	0.0879014	0.766581	0.0905187	0.780672	0.0922843	0.797798	0.0928395	0.8447	0.0999567	0.866598	0.10044	0.894341	0.10068	0.89414	0.103602	0.908743	0.102675	0.95244	0.108685	0.782019	0.0935877	0.980458	0.109187	0.791848	0.0941782	0.975847	0.110922	1.01179	0.110874	0.965118	0.111752	1.01239	0.112385	0.991688	0.113526	0.984741	0.113726
		0.941745	0.110799	1.80778	0.176582			0.450143	0.0590103	0.484744	0.0632339	0.793532	0.0911806	0.789058	0.0935385	0.803865	0.0954017	0.822157	0.0960417	0.868713	0.103162	0.892519	0.103862	0.92076	0.104062	0.91991	0.106916	0.9357	0.106137	0.979515	0.112151	0.801521	0.0939098	1.00894	0.112786	0.809934	0.0947402	1.00388	0.114514	1.04227	0.114678	0.993556	0.115499	1.04188	0.116092	1.02024	0.117194	1.01331	0.117466
		0.934691	0.111686	1.96457	0.186695			0.46015	0.060738	0.495249	0.06495	0.813278	0.0942317	0.80652	0.0962078	0.821877	0.0982313	0.841073	0.0989937	0.887373	0.105939	0.912652	0.106952	0.941282	0.107125	0.939945	0.109722	0.956638	0.10928	1.00056	0.115129	0.82506	0.0948076	1.03107	0.115942	0.831763	0.0958553	1.02567	0.117623	1.06594	0.118112	1.01565	0.118812	1.06479	0.119328	1.04244	0.120343	1.0355	0.120738
		0.959104	0.11226	2.13011	0.196895			0.466462	0.0621361	0.501885	0.0662605	0.825741	0.0968075	0.817552	0.0983102	0.833248	0.100544	0.853014	0.101456	0.899169	0.108064	0.925366	0.109459	0.954245	0.109621	0.952621	0.111794	0.969863	0.11185	1.01387	0.117377	0.851606	0.0962418	1.04506	0.1184	0.85638	0.0974745	1.03945	0.119996	1.0809	0.120898	1.02961	0.121423	1.07929	0.12183	1.05647	0.122719	1.04953	0.123276
		0.995208	0.113766	2.30489	0.207183			0.468568	0.0630913	0.504114	0.0670592	0.829913	0.0986994	0.821259	0.0996753	0.837056	0.102152	0.85701	0.10323	0.903144	0.109365	0.929631	0.111181	0.958597	0.111347	0.956911	0.112962	0.974301	0.113638	1.01837	0.118713	0.88	0.0981498	1.04977	0.11996	0.882709	0.0995272	1.0441	0.12144	1.08593	0.122808	1.03431	0.123119	1.08417	0.123395	1.06121	0.12413	1.05426	0.124875
		1.01706	0.113878	2.48944	0.217559																											0.909001	0.100448			0.9096	0.101924
		0.991188	0.116185	2.68428	0.228024																											0.937341	0.103037			0.935877	0.104559
		1.00746	0.116293	2.89001	0.23858																											0.963782	0.105802			0.960392	0.107318
		1.05845	0.118556	3.10723	0.249226																											0.987168	0.108623			0.982074	0.110081
		1.05042	0.118736	3.33658	0.259963																											1.00648	0.111377			0.999974	0.112725
		1.04195	0.119064	3.57873	0.270793																											1.02087	0.113943			1.01331	0.115137
		1.03008	0.120253	3.83441	0.281716																											1.0297	0.116209			1.0215	0.117211
		1.04173	0.121832	4	0.288474																											1.03261	0.118077			1.02419	0.118855
		1.07907	0.121887	IsoLine	IsoLine
		1.06831	0.123506
		1.08382	0.125471
		1.16945	0.128893
		1.22619	0.130794
		1.21332	0.13448
		1.37681	0.143793
		1.33651	0.146203
		1.38516	0.147605
		1.74415	0.175966
		1.69245	0.169613
		1.74917	0.173715
		1.89996	0.181795
		3.17187	0.246774
		3.93297	0.297803
		4.5611	0.314754
		4.80694	0.3046
		5.34181	0.327387
		6.54387	0.39073
		5.82798	0.347042
		6.78209	0.389679
		10.0524	0.449723
		9.69271	0.428782
		11.3577	0.486281
		11.059	0.463226
		12.6518	0.521774
		12.9532	0.533813
		11.9488	0.484183
		14.1483	0.56219
		13.4126	0.527097
		IsoLine	IsoLine
[truncated: 80 more columns]

## Sheet: PlotDat1
Source sheet	all data	0.414542	0.0566687	0	0	0.103498	0.0156334	0.468568	0.0630913	0.504114	0.0670592	0.829913	0.0986994	0.821259	0.0996753	0.837056	0.102152	0.85701	0.10323	0.903144	0.109365	0.929631	0.111181	0.958597	0.111347	0.956911	0.112962	0.974301	0.113638	1.01837	0.118713	1.03261	0.118077	1.04977	0.11996	1.02419	0.118855	1.0441	0.12144	1.08593	0.122808	1.03431	0.123119	1.08417	0.123395	1.06121	0.12413	1.05426	0.124875
Plot name	Concordia0	0.447493	0.0599438	0.0345435	0.00536346	0.217708	0.0315113	0.466297	0.0635261	0.501757	0.0672815	0.82748	0.0995607	0.817342	0.100193	0.83484	0.102806	0.85468	0.104008	0.898978	0.109735	0.927161	0.111861	0.956084	0.11204	0.952468	0.113132	0.971735	0.114366	1.01369	0.11903	1.02945	0.119464	1.04709	0.120458	1.02125	0.119998	1.03925	0.12184	1.08304	0.123561	1.03161	0.123699	1.0814	0.123871	1.05628	0.12446	1.05156	0.125373
Plot Type	1	0.723393	0.0883647	0.0702803	0.0107557	0.343738	0.0476374	0.459833	0.0634054	0.495003	0.0669094	0.820498	0.0999327	0.806118	0.0998204	0.828475	0.102981	0.847991	0.104302	0.887007	0.109145	0.920054	0.112013	0.948846	0.112212	0.939652	0.112292	0.964348	0.114562	1.00021	0.118301	1.02036	0.120309	1.03931	0.120382	1.01283	0.12059	1.02528	0.121163	1.0747	0.123725	1.02383	0.123687	1.07335	0.123752	1.04206	0.123684	1.04375	0.125273
1st free col	131	0.727148	0.0892106	0.107252	0.0161768	0.482812	0.0640155	0.4497	0.062739	0.4844	0.0659729	0.809271	0.0997992	0.788497	0.0985885	0.818239	0.10267	0.837236	0.1041	0.868201	0.107643	0.908622	0.111629	0.937199	0.111855	0.9195	0.110508	0.952462	0.114218	0.979022	0.116586	1.00575	0.120577	1.02678	0.119735	0.999272	0.120606	1.00334	0.119463	1.06127	0.123294	1.0113	0.123082	1.06038	0.123045	1.01972	0.121864	1.03118	0.124578
Sigma Level	2	0.739907	0.0918501	0.1455	0.0216271	0.636279	0.0806498	0.436718	0.0615807	0.470807	0.064548	0.794292	0.0991659	0.765905	0.0965969	0.80458	0.101885	0.822886	0.103411	0.844084	0.10535	0.893363	0.110727	0.921653	0.110985	0.893646	0.107925	0.936596	0.113349	0.951846	0.114023	0.986246	0.120255	1.01005	0.118546	0.981186	0.120043	0.975192	0.116878	1.04335	0.122286	0.994576	0.121912	1.04305	0.121778	0.991061	0.119148	1.01439	0.12332
Absolute Errs	FALSE	0.754965	0.0929539	0.18507	0.0271065	0.805631	0.097544	0.42194	0.0600245	0.455326	0.0627501	0.776214	0.0980605	0.740174	0.0940069	0.788094	0.100662	0.805567	0.102265	0.81661	0.102452	0.874945	0.109345	0.902885	0.109641	0.864185	0.104753	0.917445	0.111993	0.920883	0.11082	0.962708	0.119357	0.989839	0.116866	0.959357	0.118928	0.943123	0.113619	1.02171	0.120746	0.974384	0.120227	1.02213	0.120009	0.958406	0.115755	0.994114	0.121554
Symbol Type	1	0.802642	0.0978842	0.226006	0.0326154	0.99251	0.114702	0.406563	0.0581965	0.439209	0.0607248	0.755827	0.0965314	0.713387	0.0910283	0.769502	0.0990542	0.786037	0.100713	0.788004	0.0991848	0.854172	0.107545	0.881718	0.107881	0.833502	0.101248	0.895845	0.110208	0.888639	0.107236	0.936161	0.117923	0.967042	0.114769	0.93474	0.117309	0.909731	0.109947	0.997295	0.118741	0.951607	0.118101	0.998531	0.117814	0.924401	0.111961	0.971243	0.119357
Inverse Plot	FALSE	0.821073	0.0997645	0.268357	0.0381538	1.19873	0.132129	0.391832	0.0562446	0.423764	0.0586363	0.734023	0.0946453	0.687715	0.0879025	0.749616	0.0971313	0.765149	0.0988207	0.760584	0.0958118	0.831953	0.105405	0.859076	0.105781	0.804084	0.0976951	0.872741	0.108074	0.857728	0.103562	0.907767	0.116015	0.942653	0.112347	0.908411	0.115257	0.87772	0.106162	0.97118	0.116358	0.927241	0.115628	0.973278	0.11529	0.891802	0.108073	0.946774	0.116824
Color Plot	TRUE	0.847967	0.10012	0.31217	0.0437219	1.42629	0.149828	0.37894	0.0543272	0.410242	0.0566537	0.711754	0.0924848	0.665238	0.0848826	0.729307	0.0949775	0.743816	0.0966723	0.736571	0.0926067	0.809258	0.103018	0.835948	0.103434	0.778314	0.0943811	0.849141	0.105683	0.830653	0.100096	0.878766	0.113717	0.917735	0.109705	0.881521	0.11286	0.849684	0.10257	0.944505	0.113702	0.902351	0.112914	0.947479	0.112546	0.863249	0.104405	0.921778	0.114067
3D plot	FALSE	0.849112	0.100649	0.357497	0.0493199	1.67741	0.167804	0.368933	0.0525994	0.399737	0.0549376	0.689994	0.0901442	0.647777	0.0822134	0.70946	0.0926871	0.72297	0.0943614	0.717911	0.0898292	0.78708	0.100489	0.813345	0.100942	0.758279	0.0915749	0.826078	0.10314	0.809608	0.0971185	0.850426	0.111128	0.89338	0.10696	0.855243	0.110225	0.827894	0.0994616	0.918434	0.110888	0.878025	0.110079	0.922261	0.109702	0.841054	0.101256	0.897346	0.111205
Linear	FALSE	0.861415	0.102202	0.40439	0.0549478	IsoLine	IsoLine	0.362621	0.0512013	0.393101	0.0536271	0.669693	0.0877258	0.636745	0.080111	0.690944	0.09036	0.703522	0.0919891	0.706115	0.0877042	0.766387	0.0979283	0.792255	0.0984139	0.745603	0.0895038	0.804559	0.100556	0.796298	0.0948702	0.823985	0.108363	0.870651	0.10423	0.830728	0.107466	0.814116	0.0970888	0.894106	0.10804	0.855325	0.107247	0.898726	0.106883	0.827018	0.0988796	0.874546	0.108365
Data Range	AC3:AG63	0.905084	0.106123	0.452903	0.060606			0.360515	0.0502461	0.390871	0.0528283	0.65174	0.0853353	0.633038	0.0787458	0.674569	0.0880981	0.686322	0.0896588	0.70214	0.0864039	0.748085	0.095448	0.773601	0.0959606	0.741313	0.0883356	0.785525	0.0980444	0.791801	0.0935335	0.800599	0.105542	0.850541	0.101635	0.809047	0.104703	0.809465	0.095644	0.872586	0.105282	0.835244	0.104541	0.877902	0.104213	0.822276	0.0974691	0.854374	0.10567
Filled Symbols	FALSE	0.893884	0.107082	0.503091	0.0662945			0.362786	0.0498113	0.393229	0.052606	0.636918	0.0830773	0.636955	0.0782284	0.661048	0.0860002	0.672123	0.0874726	0.706306	0.0860337	0.732972	0.0931563	0.758196	0.0936891	0.745756	0.088165	0.769808	0.095714	0.796481	0.0932168	0.78129	0.102788	0.833929	0.0992896	0.791146	0.102058	0.814319	0.095244	0.854813	0.102735	0.818659	0.10208	0.860699	0.101807	0.827212	0.0971386	0.837713	0.103237
ConcAge	FALSE	0.930587	0.107324	0.555013	0.0720136			0.36925	0.049932	0.399983	0.0529782	0.625875	0.0810503	0.648178	0.0786007	0.650975	0.0841579	0.661544	0.085526	0.718277	0.0866236	0.72171	0.0911534	0.746715	0.0916987	0.758573	0.0890056	0.758094	0.0936672	0.80996	0.0939458	0.766902	0.100222	0.821542	0.0972948	0.777809	0.0996465	0.828284	0.0959214	0.841564	0.10051	0.806296	0.0999711	0.84787	0.0997703	0.841427	0.0979147	0.825291	0.101174
ConcSwap	FALSE	0.89556	0.107392	0.608729	0.0777633			0.379384	0.0505985	0.410586	0.0539147	0.619095	0.079343	0.6658	0.0798326	0.644788	0.0826519	0.655048	0.083904	0.737083	0.0881257	0.71479	0.0895268	0.739659	0.0900763	0.778724	0.0907896	0.750896	0.0919933	0.831146	0.0956613	0.758064	0.0979556	0.813921	0.0957384	0.769618	0.0975732	0.850228	0.0976213	0.833419	0.0987043	0.798695	0.0983065	0.839975	0.098193	0.86377	0.0997348	0.817649	0.0995705
1st Symbol-row	1	0.926784	0.108542	0.6643	0.0835438			0.392365	0.0517567	0.424179	0.0553396	0.616873	0.07803	0.688391	0.0818242	0.642758	0.0815478	0.652919	0.0826775	0.7612	0.0904185	0.712516	0.0883477	0.737337	0.0888928	0.804578	0.0933722	0.748528	0.0907656	0.858321	0.0982244	0.755161	0.0960882	0.811399	0.0946884	0.766931	0.095929	0.878375	0.100206	0.830734	0.0973966	0.796187	0.097159	0.83736	0.0971434	0.892429	0.102451	0.815123	0.0984964
		0.958333	0.110102	0.721791	0.0893554			0.407143	0.0533129	0.43966	0.0571375	0.619306	0.0771686	0.714123	0.0844142	0.644974	0.080894	0.65525	0.0819002	0.788674	0.093316	0.714986	0.0876676	0.73985	0.0882001	0.834039	0.0965444	0.751094	0.0900378	0.889285	0.101427	0.758321	0.0947012	0.814085	0.0941906	0.769866	0.0947858	0.910444	0.103466	0.833624	0.0966441	0.798883	0.0965788	0.840138	0.0966675	0.925084	0.105844	0.817822	0.0979987
		0.915247	0.110139	0.781268	0.0951981			0.422521	0.055141	0.455776	0.0591628	0.626288	0.0767966	0.740909	0.0873928	0.651339	0.080719	0.661939	0.0816059	0.81728	0.0965836	0.722092	0.0875161	0.747088	0.0880283	0.864722	0.100049	0.758481	0.0898415	0.921528	0.105011	0.767407	0.0938555	0.821863	0.0942667	0.778295	0.0941936	0.943836	0.107137	0.841966	0.0964798	0.806665	0.0965913	0.848188	0.0967861	0.959088	0.109638	0.82563	0.0980991
		0.960767	0.110269	0.842799	0.101072			0.437252	0.0570928	0.471221	0.0612513	0.637514	0.0769302	0.766581	0.0905187	0.661575	0.0810305	0.672693	0.0818076	0.8447	0.0999567	0.733525	0.0879	0.758734	0.0883849	0.89414	0.103602	0.770368	0.0901855	0.95244	0.108685	0.782019	0.0935877	0.834393	0.0949136	0.791848	0.0941782	0.975847	0.110922	0.855393	0.0969109	0.819192	0.0971959	0.861158	0.0974939	0.991688	0.113526	0.838203	0.0987934
		0.941745	0.110799	0.906456	0.106978			0.450143	0.0590103	0.484744	0.0632339	0.652494	0.0775635	0.789058	0.0935385	0.675235	0.0818149	0.687044	0.0824965	0.868713	0.103162	0.748784	0.0888024	0.774281	0.0892545	0.91991	0.106916	0.786233	0.0910546	0.979515	0.112151	0.801521	0.0939098	0.851127	0.0961029	0.809934	0.0947402	1.00388	0.114514	0.873319	0.0979186	0.835917	0.0983661	0.878481	0.0987601	1.02024	0.117194	0.854994	0.100051
		0.934691	0.111686	0.972312	0.112915			0.46015	0.060738	0.495249	0.06495	0.670572	0.0786688	0.80652	0.0962078	0.691721	0.0830378	0.704362	0.0836424	0.887373	0.105939	0.767202	0.0901839	0.793048	0.0905989	0.939945	0.109722	0.805384	0.0924109	1.00056	0.115129	0.82506	0.0948076	0.871334	0.0977826	0.831763	0.0958553	1.02567	0.117623	0.894961	0.0994587	0.856109	0.100051	0.899401	0.100529	1.04244	0.120343	0.875268	0.101817
		0.959104	0.11226	1.04044	0.118884			0.466462	0.0621361	0.501885	0.0662605	0.690959	0.080198	0.817552	0.0983102	0.710313	0.0846459	0.723893	0.0851953	0.899169	0.108064	0.787975	0.0919841	0.814216	0.0923594	0.952621	0.111794	0.826984	0.0941952	1.01387	0.117377	0.851606	0.0962418	0.894131	0.0998793	0.85638	0.0974745	1.03945	0.119996	0.919372	0.101464	0.878886	0.102177	0.923003	0.102724	1.05647	0.122719	0.898139	0.104015
		0.995208	0.113766	1.11093	0.124885			0.468568	0.0630913	0.504114	0.0670592	0.712763	0.082084	0.821259	0.0996753	0.730198	0.0865688	0.744781	0.0870872	0.903144	0.109365	0.810194	0.0941244	0.836858	0.0944591	0.956911	0.112962	0.850089	0.0963293	1.01837	0.118713	0.88	0.0981498	0.91852	0.102301	0.882709	0.0995272	1.0441	0.12144	0.945486	0.103847	0.903252	0.10465	0.948255	0.105249	1.06121	0.12413	0.922607	0.106548
		1.01706	0.113878	1.18385	0.130918							0.735032	0.0842445			0.750508	0.0887226	0.766114	0.0892356			0.832888	0.0965112	0.859986	0.0968062			0.873688	0.0987201			0.909001	0.100448	0.943438	0.104943	0.9096	0.101924			0.972162	0.106503	0.928142	0.107364	0.974055	0.107993			0.947604	0.109305
		0.991188	0.116185	1.25928	0.136984							0.756792	0.0865852			0.770354	0.091013	0.78696	0.0915464			0.855067	0.0990401	0.882589	0.0992982			0.896752	0.101263			0.937341	0.103037	0.967793	0.107689	0.935877	0.104559			0.998233	0.109317	0.952469	0.110199	0.999273	0.110836			0.972036	0.112166
		1.00746	0.116293	1.33733	0.143082							0.777092	0.0890035			0.78887	0.0933401	0.806408	0.0939188			0.875759	0.101601	0.903678	0.101826			0.918271	0.103847			0.963782	0.105802	0.990522	0.110419	0.960392	0.107318			1.02256	0.112164	0.975169	0.113031	1.02281	0.113655			0.994836	0.115007
		1.05845	0.118556	1.41807	0.149213							0.795046	0.091394			0.805246	0.095602	0.823607	0.096249			0.894062	0.104081	0.922333	0.104279			0.937305	0.106359			0.987168	0.108623	1.01063	0.113013	0.982074	0.110081			1.04408	0.114922	0.99525	0.115737	1.04363	0.116326			1.01501	0.117702
		1.05042	0.118736	1.50159	0.155377							0.809868	0.0936521			0.818766	0.0976999	0.837807	0.0984352			0.909175	0.106373	0.937738	0.106551			0.953022	0.10869			1.00648	0.111377	1.02724	0.115359	0.999974	0.112725			1.06185	0.117469	1.01183	0.118198	1.06083	0.118732			1.03167	0.120134
		1.04195	0.119064	1.58801	0.161574							0.82091	0.095679			0.82884	0.0995422	0.848386	0.100382			0.920437	0.108376	0.949219	0.108541			0.964735	0.110736			1.02087	0.113943	1.03963	0.117354	1.01331	0.115137			1.0751	0.119694	1.0242	0.120307	1.07366	0.120768			1.04409	0.122197
		1.03008	0.120253	1.67741	0.167804							0.827691	0.0973863			0.835027	0.101048	0.854881	0.102004			0.927357	0.110002	0.956275	0.110164			0.971933	0.11241			1.0297	0.116209	1.04725	0.11891	1.0215	0.117211			1.08325	0.1215	1.0318	0.121972	1.08156	0.122345			1.05173	0.123801
		1.04173	0.121832	1.76989	0.174067							0.829913	0.0986994			0.837056	0.102152	0.85701	0.10323			0.929631	0.111181	0.958597	0.111347			0.974301	0.113638			1.03261	0.118077	1.04977	0.11996	1.02419	0.118855			1.08593	0.122808	1.03431	0.123119	1.08417	0.123395			1.05426	0.124875
		1.07907	0.121887	1.8	0.176049
		1.06831	0.123506	IsoLine	IsoLine
		1.08382	0.125471
		1.16945	0.128893
		1.22619	0.130794
		1.21332	0.13448
		1.37681	0.143793
		1.33651	0.146203
		1.38516	0.147605
		1.74415	0.175966
		1.69245	0.169613
		1.74917	0.173715
		1.89996	0.181795
		3.17187	0.246774
		3.93297	0.297803
		4.5611	0.314754
		4.80694	0.3046
		5.34181	0.327387
		6.54387	0.39073
		5.82798	0.347042
		6.78209	0.389679
		10.0524	0.449723
		9.69271	0.428782
		11.3577	0.486281
		11.059	0.463226
		12.6518	0.521774
		12.9532	0.533813
		11.9488	0.484183
		14.1483	0.56219
		13.4126	0.527097
		IsoLine	IsoLine
[truncated: 80 more columns]

## Sheet: PlotDat2
Source sheet	all data	0.414542	0.0566687	0.371186	0.0508927	0.398508	0.0541582	0.426375	0.0574338	0.454796	0.0607196	0.483784	0.0640155	0.513349	0.0673218	0.346693	0.048	0.347389	0.048	0.346002	0.048	0.343738	0.0476374	0.468568	0.0630913	0.504114	0.0670592	0.479266	0.0640865
Plot name	Concordia0	0.447493	0.0599438	0.371157	0.050912	0.398477	0.0541787	0.42634	0.0574556	0.454759	0.0607426	0.483744	0.0640399	0.513307	0.0673474	0.346693	0.048	0.352327	0.048603	0.346693	0.048085	0.370468	0.0508927	0.468001	0.0633721	0.503305	0.0672604	0.478572	0.064303
Plot Type	1	IsoLine	IsoLine	0.371072	0.0509296	0.398385	0.0541975	0.426241	0.0574756	0.454652	0.0607638	0.48363	0.0640623	0.513184	0.067371	0.352327	0.0486893	0.357984	0.0492915	0.352327	0.0487756	0.397729	0.0541582	0.466394	0.0635225	0.500973	0.0672621	0.476582	0.0643515
1st free col	31			0.370938	0.0509443	0.398239	0.0542132	0.426084	0.0574922	0.454483	0.0607814	0.483448	0.0640809	0.51299	0.0673906	0.357984	0.0493791	0.363664	0.0499805	0.357984	0.0494666	0.425533	0.0574338	0.463778	0.0635394	0.497182	0.0670641	0.47335	0.0642306
Sigma Level	2			0.370766	0.0509548	0.398053	0.0542244	0.425883	0.0575041	0.454267	0.060794	0.483215	0.0640942	0.512741	0.0674046	0.363664	0.0500693	0.369369	0.0506699	0.363664	0.0501581	0.45389	0.0607196	0.460203	0.0634226	0.492035	0.0666719	0.468965	0.0639438
Absolute Errs	FALSE			0.37057	0.0509603	0.39784	0.0542302	0.425653	0.0575103	0.454019	0.0608006	0.48295	0.0641011	0.512456	0.0674119	0.369369	0.0507599	0.375097	0.0513598	0.369369	0.05085	0.482812	0.0640155	0.45574	0.0631744	0.485674	0.0660962	0.463546	0.0634987
Symbol Type	1			0.370365	0.0509603	0.397618	0.0542302	0.425414	0.0575103	0.453762	0.0608006	0.482673	0.0641011	0.51216	0.0674119	0.375097	0.0514511	0.380849	0.0520501	0.375097	0.0515424	0.512308	0.0673218	0.450474	0.0627995	0.478271	0.0653526	0.457241	0.0629075
Inverse Plot	FALSE			0.370169	0.0509548	0.397406	0.0542244	0.425184	0.0575041	0.453514	0.060794	0.482408	0.0640942	0.511876	0.0674046	0.380849	0.0521426	0.386626	0.0527409	0.380849	0.0522352	IsoLine	IsoLine	0.44451	0.0623053	0.470029	0.0644615	0.450222	0.0621864
Color Plot	TRUE			0.369997	0.0509443	0.397219	0.0542132	0.424982	0.0574922	0.453297	0.0607814	0.482175	0.0640809	0.511626	0.0673906	0.386626	0.0528347	0.392426	0.0534321	0.386626	0.0529285			0.437962	0.0617014	0.461172	0.0634472	0.44268	0.0613551
3D plot	FALSE			0.369863	0.0509296	0.397074	0.0541975	0.424826	0.0574756	0.453129	0.0607638	0.481994	0.0640623	0.511432	0.067371	0.392426	0.0535272	0.398251	0.0541238	0.392426	0.0536222			0.430958	0.0609995	0.451942	0.0623373	0.434821	0.0604361
Linear	FALSE			0.369778	0.050912	0.396982	0.0541787	0.424726	0.0574556	0.453021	0.0607426	0.481879	0.0640399	0.511309	0.0673474	0.398251	0.0542201	0.4041	0.0548159	0.398251	0.0543164			0.423634	0.0602134	0.44259	0.0611621	0.42686	0.0594546
Data Range	AC3:AG4			0.369749	0.0508927	0.39695	0.0541582	0.424692	0.0574338	0.452985	0.0607196	0.481839	0.0640155	0.511267	0.0673218	0.4041	0.0549135	0.409973	0.0555085	0.4041	0.0550111			0.416134	0.0593582	0.433372	0.0599537	0.419013	0.0584373
Filled Symbols	FALSE			0.369778	0.0508735	0.396982	0.0541377	0.424726	0.057412	0.453021	0.0606965	0.481879	0.0639912	0.511309	0.0672961	0.409973	0.0556073	0.415871	0.0562015	0.409973	0.0557062			0.408603	0.0584507	0.42454	0.058745	0.411496	0.0574121
ConcAge	TRUE			0.369863	0.0508558	0.397074	0.0541188	0.424826	0.057392	0.453129	0.0606753	0.481994	0.0639688	0.511432	0.0672725	0.415871	0.0563017	0.421794	0.056895	0.415871	0.0564018			0.401187	0.0575086	0.416333	0.057569	0.404511	0.0564068
ConcSwap	FALSE			0.369997	0.0508411	0.397219	0.0541031	0.424982	0.0573753	0.453297	0.0606577	0.482175	0.0639502	0.511626	0.067253	0.421794	0.0569964	0.427742	0.057589	0.421794	0.0570978			0.394031	0.05655	0.408977	0.0564578	0.398252	0.0554488
1st Symbol-row	1			0.370169	0.0508306	0.397406	0.0540919	0.425184	0.0573634	0.453514	0.0606451	0.482408	0.0639369	0.511876	0.0672389	0.427742	0.0576916	0.433714	0.0582834	0.427742	0.0577943			0.387275	0.0555938	0.402671	0.0554417	0.392887	0.0545644
				0.370365	0.0508251	0.397618	0.0540861	0.425414	0.0573572	0.453762	0.0606385	0.482673	0.06393	0.51216	0.0672316	0.433714	0.0583873	0.439712	0.0589783	0.433714	0.0584913			0.381049	0.0546585	0.397587	0.0545484	0.388563	0.0537776
				0.37057	0.0508251	0.39784	0.0540861	0.425653	0.0573572	0.454019	0.0606385	0.48295	0.06393	0.512456	0.0672316	0.439712	0.0590835	0.445734	0.0596736	0.439712	0.0591887			0.375475	0.0537623	0.393865	0.0538023	0.385399	0.0531099
				0.370766	0.0508306	0.398053	0.0540919	0.425883	0.0573634	0.454267	0.0606451	0.483215	0.0639369	0.512741	0.0672389	0.445734	0.0597801	0.451782	0.0603694	0.445734	0.0598865			0.370661	0.0529227	0.391606	0.0532236	0.38348	0.0525795
				0.370938	0.0508411	0.398239	0.0541031	0.426084	0.0573753	0.454483	0.0606577	0.483448	0.0639502	0.51299	0.067253	0.451782	0.0604771	0.457855	0.0610656	0.451782	0.0605849			0.366702	0.052156	0.390871	0.0528283	0.382859	0.0522009
				0.371072	0.0508558	0.398385	0.0541188	0.426241	0.057392	0.454652	0.0606753	0.48363	0.0639688	0.513184	0.0672725	0.457855	0.0611746	0.463953	0.0617623	0.457855	0.0612837			0.363673	0.0514772	0.391681	0.0526271	0.383554	0.0519844
				0.371157	0.0508735	0.398477	0.0541377	0.42634	0.057412	0.454759	0.0606965	0.483744	0.0639912	0.513307	0.0672961	0.463953	0.0618726	0.470077	0.0624594	0.463953	0.0619829			0.361635	0.0508994	0.394013	0.0526255	0.385544	0.0519359
				0.371186	0.0508927	0.398508	0.0541582	0.426375	0.0574338	0.454796	0.0607196	0.483784	0.0640155	0.513349	0.0673218	0.470077	0.062571	0.476227	0.063157	0.470077	0.0626826			0.360627	0.0504339	0.397804	0.0528235	0.388775	0.0520567
				ConcTikEll	ConcTikEll	ConcTikEll	ConcTikEll	ConcTikEll	ConcTikEll	ConcTikEll	ConcTikEll	ConcTikEll	ConcTikEll	ConcTikEll	ConcTikEll	0.476227	0.0632699	0.482402	0.0638551	0.476227	0.0633828			0.360667	0.0500897	0.40295	0.0532157	0.39316	0.0523436
																0.482402	0.0639693	0.488603	0.0645536	0.482402	0.0640834			0.361757	0.0498736	0.409312	0.0537914	0.39858	0.0527887
																0.488603	0.0646691	0.49483	0.0652526	0.488603	0.0647845			0.363874	0.0497897	0.416715	0.054535	0.404885	0.0533799
																0.49483	0.0653693	0.501083	0.065952	0.49483	0.0654861			0.366977	0.0498398	0.424957	0.0554261	0.411904	0.0541009
																0.501083	0.0660701	0.507363	0.0666519	0.501083	0.0661881			0.371006	0.0500227	0.433814	0.0564404	0.419446	0.0549323
																0.507363	0.0667713	0.513668	0.0673523	0.507363	0.0668906			0.375882	0.050335	0.443044	0.0575503	0.427304	0.0558513
																0.513668	0.0674729	0.52	0.0680531	0.513668	0.0675935			0.381511	0.0507706	0.452396	0.0587255	0.435265	0.0568328
																0.52	0.068175	0.52	0.0680531	0.52	0.0682969			0.387783	0.051321	0.461613	0.0599339	0.443112	0.0578501
																0.52	0.068175	ConcBand	ConcBand	0.52	0.0682969			0.394575	0.0519755	0.470446	0.0611425	0.45063	0.0588753
																IsoLine	IsoLine			ConcBand	ConcBand			0.401756	0.0527213	0.478653	0.0623185	0.457614	0.0598806
																								0.409186	0.053544	0.486009	0.0634297	0.463874	0.0608386
																								0.41672	0.0544275	0.492315	0.0644458	0.469239	0.061723
																								0.424212	0.0553546	0.497398	0.0653392	0.473562	0.0625098
																								0.431516	0.0563072	0.50112	0.0660853	0.476727	0.0631775
																								0.438489	0.057267	0.50338	0.0666639	0.478645	0.0637079
																								0.444996	0.058215	0.504114	0.0670592	0.479266	0.0640865
																								0.45091	0.059133			Cyan	Cyan
																								0.456117	0.060003
																								0.460514	0.0608081
																								0.464016	0.0615327
																								0.466556	0.0621625
																								0.468083	0.0626855
																								0.468568	0.0630913

## Sheet: PlotDat3
Source sheet	all data	0.414542	0.0566687	0.371186	0.0508927	0.398508	0.0541582	0.426375	0.0574338	0.454796	0.0607196	0.483784	0.0640155	0.513349	0.0673218	0.346693	0.048	0.347389	0.048	0.346002	0.048	0.343738	0.0476374	0.468568	0.0630913	0.504114	0.0670592	0.479266	0.0640865
Plot name	Concordia0	0.447493	0.0599438	0.371157	0.050912	0.398477	0.0541787	0.42634	0.0574556	0.454759	0.0607426	0.483744	0.0640399	0.513307	0.0673474	0.346693	0.048	0.352327	0.048603	0.346693	0.048085	0.370468	0.0508927	0.468001	0.0633721	0.503305	0.0672604	0.478572	0.064303
Plot Type	1	IsoLine	IsoLine	0.371072	0.0509296	0.398385	0.0541975	0.426241	0.0574756	0.454652	0.0607638	0.48363	0.0640623	0.513184	0.067371	0.352327	0.0486893	0.357984	0.0492915	0.352327	0.0487756	0.397729	0.0541582	0.466394	0.0635225	0.500973	0.0672621	0.476582	0.0643515
1st free col	31			0.370938	0.0509443	0.398239	0.0542132	0.426084	0.0574922	0.454483	0.0607814	0.483448	0.0640809	0.51299	0.0673906	0.357984	0.0493791	0.363664	0.0499805	0.357984	0.0494666	0.425533	0.0574338	0.463778	0.0635394	0.497182	0.0670641	0.47335	0.0642306
Sigma Level	2			0.370766	0.0509548	0.398053	0.0542244	0.425883	0.0575041	0.454267	0.060794	0.483215	0.0640942	0.512741	0.0674046	0.363664	0.0500693	0.369369	0.0506699	0.363664	0.0501581	0.45389	0.0607196	0.460203	0.0634226	0.492035	0.0666719	0.468965	0.0639438
Absolute Errs	FALSE			0.37057	0.0509603	0.39784	0.0542302	0.425653	0.0575103	0.454019	0.0608006	0.48295	0.0641011	0.512456	0.0674119	0.369369	0.0507599	0.375097	0.0513598	0.369369	0.05085	0.482812	0.0640155	0.45574	0.0631744	0.485674	0.0660962	0.463546	0.0634987
Symbol Type	1			0.370365	0.0509603	0.397618	0.0542302	0.425414	0.0575103	0.453762	0.0608006	0.482673	0.0641011	0.51216	0.0674119	0.375097	0.0514511	0.380849	0.0520501	0.375097	0.0515424	0.512308	0.0673218	0.450474	0.0627995	0.478271	0.0653526	0.457241	0.0629075
Inverse Plot	FALSE			0.370169	0.0509548	0.397406	0.0542244	0.425184	0.0575041	0.453514	0.060794	0.482408	0.0640942	0.511876	0.0674046	0.380849	0.0521426	0.386626	0.0527409	0.380849	0.0522352	IsoLine	IsoLine	0.44451	0.0623053	0.470029	0.0644615	0.450222	0.0621864
Color Plot	FALSE			0.369997	0.0509443	0.397219	0.0542132	0.424982	0.0574922	0.453297	0.0607814	0.482175	0.0640809	0.511626	0.0673906	0.386626	0.0528347	0.392426	0.0534321	0.386626	0.0529285			0.437962	0.0617014	0.461172	0.0634472	0.44268	0.0613551
3D plot	FALSE			0.369863	0.0509296	0.397074	0.0541975	0.424826	0.0574756	0.453129	0.0607638	0.481994	0.0640623	0.511432	0.067371	0.392426	0.0535272	0.398251	0.0541238	0.392426	0.0536222			0.430958	0.0609995	0.451942	0.0623373	0.434821	0.0604361
Linear	FALSE			0.369778	0.050912	0.396982	0.0541787	0.424726	0.0574556	0.453021	0.0607426	0.481879	0.0640399	0.511309	0.0673474	0.398251	0.0542201	0.4041	0.0548159	0.398251	0.0543164			0.423634	0.0602134	0.44259	0.0611621	0.42686	0.0594546
Data Range	AC3:AG4			0.369749	0.0508927	0.39695	0.0541582	0.424692	0.0574338	0.452985	0.0607196	0.481839	0.0640155	0.511267	0.0673218	0.4041	0.0549135	0.409973	0.0555085	0.4041	0.0550111			0.416134	0.0593582	0.433372	0.0599537	0.419013	0.0584373
Filled Symbols	FALSE			0.369778	0.0508735	0.396982	0.0541377	0.424726	0.057412	0.453021	0.0606965	0.481879	0.0639912	0.511309	0.0672961	0.409973	0.0556073	0.415871	0.0562015	0.409973	0.0557062			0.408603	0.0584507	0.42454	0.058745	0.411496	0.0574121
ConcAge	TRUE			0.369863	0.0508558	0.397074	0.0541188	0.424826	0.057392	0.453129	0.0606753	0.481994	0.0639688	0.511432	0.0672725	0.415871	0.0563017	0.421794	0.056895	0.415871	0.0564018			0.401187	0.0575086	0.416333	0.057569	0.404511	0.0564068
ConcSwap	FALSE			0.369997	0.0508411	0.397219	0.0541031	0.424982	0.0573753	0.453297	0.0606577	0.482175	0.0639502	0.511626	0.067253	0.421794	0.0569964	0.427742	0.057589	0.421794	0.0570978			0.394031	0.05655	0.408977	0.0564578	0.398252	0.0554488
1st Symbol-row	1			0.370169	0.0508306	0.397406	0.0540919	0.425184	0.0573634	0.453514	0.0606451	0.482408	0.0639369	0.511876	0.0672389	0.427742	0.0576916	0.433714	0.0582834	0.427742	0.0577943			0.387275	0.0555938	0.402671	0.0554417	0.392887	0.0545644
				0.370365	0.0508251	0.397618	0.0540861	0.425414	0.0573572	0.453762	0.0606385	0.482673	0.06393	0.51216	0.0672316	0.433714	0.0583873	0.439712	0.0589783	0.433714	0.0584913			0.381049	0.0546585	0.397587	0.0545484	0.388563	0.0537776
				0.37057	0.0508251	0.39784	0.0540861	0.425653	0.0573572	0.454019	0.0606385	0.48295	0.06393	0.512456	0.0672316	0.439712	0.0590835	0.445734	0.0596736	0.439712	0.0591887			0.375475	0.0537623	0.393865	0.0538023	0.385399	0.0531099
				0.370766	0.0508306	0.398053	0.0540919	0.425883	0.0573634	0.454267	0.0606451	0.483215	0.0639369	0.512741	0.0672389	0.445734	0.0597801	0.451782	0.0603694	0.445734	0.0598865			0.370661	0.0529227	0.391606	0.0532236	0.38348	0.0525795
				0.370938	0.0508411	0.398239	0.0541031	0.426084	0.0573753	0.454483	0.0606577	0.483448	0.0639502	0.51299	0.067253	0.451782	0.0604771	0.457855	0.0610656	0.451782	0.0605849			0.366702	0.052156	0.390871	0.0528283	0.382859	0.0522009
				0.371072	0.0508558	0.398385	0.0541188	0.426241	0.057392	0.454652	0.0606753	0.48363	0.0639688	0.513184	0.0672725	0.457855	0.0611746	0.463953	0.0617623	0.457855	0.0612837			0.363673	0.0514772	0.391681	0.0526271	0.383554	0.0519844
				0.371157	0.0508735	0.398477	0.0541377	0.42634	0.057412	0.454759	0.0606965	0.483744	0.0639912	0.513307	0.0672961	0.463953	0.0618726	0.470077	0.0624594	0.463953	0.0619829			0.361635	0.0508994	0.394013	0.0526255	0.385544	0.0519359
				0.371186	0.0508927	0.398508	0.0541582	0.426375	0.0574338	0.454796	0.0607196	0.483784	0.0640155	0.513349	0.0673218	0.470077	0.062571	0.476227	0.063157	0.470077	0.0626826			0.360627	0.0504339	0.397804	0.0528235	0.388775	0.0520567
				ConcTikEll	ConcTikEll	ConcTikEll	ConcTikEll	ConcTikEll	ConcTikEll	ConcTikEll	ConcTikEll	ConcTikEll	ConcTikEll	ConcTikEll	ConcTikEll	0.476227	0.0632699	0.482402	0.0638551	0.476227	0.0633828			0.360667	0.0500897	0.40295	0.0532157	0.39316	0.0523436
																0.482402	0.0639693	0.488603	0.0645536	0.482402	0.0640834			0.361757	0.0498736	0.409312	0.0537914	0.39858	0.0527887
																0.488603	0.0646691	0.49483	0.0652526	0.488603	0.0647845			0.363874	0.0497897	0.416715	0.054535	0.404885	0.0533799
																0.49483	0.0653693	0.501083	0.065952	0.49483	0.0654861			0.366977	0.0498398	0.424957	0.0554261	0.411904	0.0541009
																0.501083	0.0660701	0.507363	0.0666519	0.501083	0.0661881			0.371006	0.0500227	0.433814	0.0564404	0.419446	0.0549323
																0.507363	0.0667713	0.513668	0.0673523	0.507363	0.0668906			0.375882	0.050335	0.443044	0.0575503	0.427304	0.0558513
																0.513668	0.0674729	0.52	0.0680531	0.513668	0.0675935			0.381511	0.0507706	0.452396	0.0587255	0.435265	0.0568328
																0.52	0.068175	0.52	0.0680531	0.52	0.0682969			0.387783	0.051321	0.461613	0.0599339	0.443112	0.0578501
																0.52	0.068175	ConcBand	ConcBand	0.52	0.0682969			0.394575	0.0519755	0.470446	0.0611425	0.45063	0.0588753
																IsoLine	IsoLine			ConcBand	ConcBand			0.401756	0.0527213	0.478653	0.0623185	0.457614	0.0598806
																								0.409186	0.053544	0.486009	0.0634297	0.463874	0.0608386
																								0.41672	0.0544275	0.492315	0.0644458	0.469239	0.061723
																								0.424212	0.0553546	0.497398	0.0653392	0.473562	0.0625098
																								0.431516	0.0563072	0.50112	0.0660853	0.476727	0.0631775
																								0.438489	0.057267	0.50338	0.0666639	0.478645	0.0637079
																								0.444996	0.058215	0.504114	0.0670592	0.479266	0.0640865
																								0.45091	0.059133	Black	Black
																								0.456117	0.060003
																								0.460514	0.0608081
																								0.464016	0.0615327
																								0.466556	0.0621625
																								0.468083	0.0626855
																								0.468568	0.0630913
																								Black	Black

## Sheet: PlotDat5
Source sheet	all data	0.723393	0.0883647	0.558806	0.0723004	0.637621	0.0806498	0.72042	0.0890642	0.807407	0.097544	0.898791	0.10609	0.994796	0.114702	0.55	0.0714685	0.55	0.0713405	0.55	0.0715965	0.482812	0.0640155	0.829913	0.0986994	0.821259	0.0996753	0.837056	0.102152	0.85701	0.10323	0.903144	0.109365	0.929631	0.111181	0.958597	0.111347	0.816742	0.0989815
Plot name	Concordia1	0.727148	0.0892106	0.558759	0.072328	0.637566	0.0806807	0.720358	0.0890984	0.807335	0.0975817	0.898709	0.106131	0.994703	0.114747	0.55	0.0714685	0.55	0.0713405	0.55	0.0715965	0.557657	0.0723004	0.828806	0.0993265	0.819914	0.100083	0.835658	0.102708	0.855539	0.103883	0.901718	0.109696	0.928073	0.111762	0.957013	0.111937	0.815665	0.0992593
Plot Type	1	0.739907	0.0918501	0.558623	0.0723534	0.637408	0.0807091	0.720174	0.0891299	0.807125	0.0976164	0.89847	0.106169	0.994433	0.114788	0.563684	0.0729529	0.563684	0.0728221	0.563684	0.0730836	0.636279	0.0806498	0.825647	0.0997403	0.816039	0.100193	0.831647	0.102967	0.851324	0.104238	0.897589	0.109705	0.923596	0.112015	0.952454	0.112204	0.812565	0.0993027
1st free col	41	0.754965	0.0929539	0.558409	0.0723745	0.637158	0.0807327	0.719886	0.0891561	0.806794	0.0976451	0.898094	0.1062	0.994007	0.114822	0.577488	0.0744393	0.577488	0.0743058	0.577488	0.0745728	0.718871	0.0890642	0.820498	0.0999327	0.809739	0.100004	0.825134	0.102923	0.84448	0.104285	0.89087	0.109392	0.916323	0.111933	0.945045	0.112141	0.807578	0.0991099
Sigma Level	2	0.802642	0.0978842	0.558134	0.0723896	0.636837	0.0807496	0.719514	0.0891748	0.806369	0.0976657	0.89761	0.106223	0.993459	0.114847	0.591414	0.0759278	0.591414	0.0757916	0.591414	0.0760641	0.805631	0.097544	0.813458	0.0998999	0.801187	0.0995209	0.816296	0.102577	0.835195	0.104023	0.881745	0.108765	0.906452	0.11152	0.934988	0.111751	0.800921	0.0986894
Absolute Errs	FALSE	0.821073	0.0997645	0.55782	0.0723974	0.63647	0.0807584	0.719091	0.0891846	0.805884	0.0976765	0.897058	0.106235	0.992835	0.114859	0.605463	0.0774184	0.605463	0.0772794	0.605463	0.0775574	0.89677	0.10609	0.804666	0.0996427	0.790614	0.0987563	0.805375	0.101938	0.823721	0.103459	0.870461	0.107841	0.894252	0.110787	0.922558	0.111043	0.792886	0.0980594
Symbol Type	1	0.847967	0.10012	0.557493	0.0723974	0.636089	0.0807584	0.71865	0.0891846	0.805378	0.0976765	0.896482	0.106235	0.992184	0.114859	0.619637	0.078911	0.619637	0.0787692	0.619637	0.0790528	0.99251	0.114702	0.794292	0.0991659	0.778311	0.0977313	0.792668	0.101024	0.810372	0.102609	0.857328	0.106645	0.880055	0.109752	0.908092	0.110038	0.783823	0.0972476
Inverse Plot	FALSE	IsoLine	IsoLine	0.557179	0.0723896	0.635722	0.0807496	0.718227	0.0891748	0.804893	0.0976657	0.895931	0.106223	0.99156	0.114847	0.633935	0.0804058	0.633935	0.0802612	0.633935	0.0805503	IsoLine	IsoLine	0.782538	0.0984788	0.764612	0.0964739	0.778521	0.0998599	0.795512	0.101495	0.842703	0.105211	0.86425	0.108445	0.891987	0.108762	0.774128	0.0962894
Color Plot	FALSE			0.556904	0.0723745	0.635401	0.0807327	0.717856	0.0891561	0.804468	0.0976451	0.895447	0.1062	0.991012	0.114822	0.64836	0.0819025	0.64836	0.0817552	0.64836	0.0820499			0.769632	0.0975949	0.749891	0.0950183	0.763321	0.0984773	0.779545	0.100148	0.826986	0.103576	0.847267	0.106902	0.874681	0.10725	0.764226	0.0952266
3D plot	FALSE			0.55669	0.0723534	0.635151	0.0807091	0.717567	0.0891299	0.804137	0.0976164	0.89507	0.106169	0.990586	0.114788	0.662912	0.0834014	0.662912	0.0832512	0.662912	0.0835516			0.755827	0.0965314	0.73455	0.0934044	0.747483	0.0969139	0.762908	0.0986051	0.810604	0.101787	0.829569	0.105163	0.856646	0.105544	0.75455	0.0941058
Linear	FALSE			0.556554	0.072328	0.634993	0.0806807	0.717384	0.0890984	0.803927	0.0975817	0.894831	0.106131	0.990316	0.114747	0.677592	0.0849023	0.677592	0.0847493	0.677592	0.0850553			0.74139	0.0953089	0.719007	0.091676	0.731438	0.0952124	0.746054	0.0969078	0.794005	0.0998907	0.81164	0.103278	0.838375	0.103689	0.745521	0.0929759
Data Range	AC5:AG11			0.556508	0.0723004	0.634938	0.0806498	0.717321	0.0890642	0.803855	0.097544	0.894749	0.10609	0.990223	0.114702	0.692402	0.0864053	0.692402	0.0862495	0.692402	0.0865611			0.726603	0.0939512	0.703685	0.0898804	0.715624	0.0934191	0.729444	0.0951027	0.777642	0.0979399	0.793968	0.101296	0.820365	0.101738	0.737535	0.0918863
Filled Symbols	FALSE			0.556554	0.0722728	0.634993	0.0806188	0.717384	0.0890299	0.803927	0.0975064	0.894831	0.106049	0.990316	0.114658	0.707343	0.0879104	0.707343	0.0877518	0.707343	0.088069			0.711754	0.0924848	0.689004	0.0880666	0.700472	0.0915831	0.713529	0.093239	0.761961	0.0959875	0.777036	0.0992731	0.803108	0.099742	0.73094	0.0908847
ConcAge	TRUE			0.55669	0.0722474	0.635151	0.0805904	0.717567	0.0889984	0.804137	0.0974717	0.89507	0.106011	0.990586	0.114617	0.722415	0.0894176	0.722415	0.0892561	0.722415	0.089579			0.697131	0.0909382	0.675364	0.0862839	0.686396	0.0897544	0.698745	0.0913675	0.747389	0.094087	0.761304	0.0972633	0.787075	0.0977566	0.726025	0.0900147
ConcSwap	FALSE			0.556904	0.0722263	0.635401	0.0805668	0.717856	0.0889722	0.804468	0.0974429	0.895447	0.10598	0.991012	0.114583	0.737621	0.0909269	0.737621	0.0907626	0.737621	0.0910912			0.683019	0.0893415	0.663136	0.0845811	0.67378	0.0879828	0.685494	0.0895393	0.734324	0.09229	0.747203	0.0953217	0.772702	0.0958356	0.723005	0.0893144
1st Symbol-row	1			0.557179	0.0722112	0.635722	0.0805499	0.718227	0.0889535	0.804893	0.0974224	0.895931	0.105957	0.99156	0.114558	0.752961	0.0924382	0.752961	0.0922711	0.752961	0.0926054			0.669693	0.0877258	0.652654	0.0830045	0.662967	0.0863167	0.674138	0.0878042	0.723123	0.0906455	0.735117	0.0935014	0.760383	0.0940315	0.722012	0.0888145
				0.557493	0.0722034	0.636089	0.0805411	0.71865	0.0889437	0.805378	0.0974116	0.896482	0.105945	0.992184	0.114546	0.768436	0.0939517	0.768436	0.0937817	0.768436	0.0941217			0.657413	0.0861225	0.644204	0.0815973	0.654254	0.0848016	0.664987	0.0862096	0.714092	0.0891986	0.725376	0.0918518	0.750453	0.0923935	0.723089	0.0885367
				0.55782	0.0722034	0.63647	0.0805411	0.719091	0.0889437	0.805884	0.0974116	0.897058	0.105945	0.992835	0.114546	0.784048	0.0954672	0.784048	0.0952944	0.784048	0.0956401			0.646416	0.0845629	0.638016	0.0803977	0.647876	0.0834787	0.658291	0.084799	0.707475	0.0879886	0.718245	0.0904181	0.743182	0.0909662	0.726189	0.0884933
				0.558134	0.0722112	0.636837	0.0805499	0.719514	0.0889535	0.806369	0.0974224	0.89761	0.105957	0.993459	0.114558	0.799798	0.0969849	0.799798	0.0968091	0.799798	0.0971606			0.636918	0.0830773	0.63426	0.0794385	0.644009	0.0823841	0.654231	0.0836108	0.703455	0.0870485	0.713919	0.0892394	0.73877	0.0897886	0.731176	0.088686
				0.558409	0.0722263	0.637158	0.0805668	0.719886	0.0889722	0.806794	0.0974429	0.898094	0.10598	0.994007	0.114583	0.815687	0.0985046	0.815687	0.098326	0.815687	0.0986832			0.629103	0.0816945	0.633038	0.0787458	0.642758	0.0815478	0.652919	0.0826775	0.70214	0.0864039	0.712516	0.0883477	0.737337	0.0888928	0.737833	0.0891066
				0.558623	0.0722474	0.637408	0.0805904	0.720174	0.0889984	0.807125	0.0974717	0.89847	0.106011	0.994433	0.114617	0.831716	0.100026	0.831716	0.099845	0.831716	0.100208			0.623123	0.0804417	0.634382	0.0783386	0.644157	0.0809925	0.654391	0.0820245	0.703566	0.0860725	0.714074	0.0877675	0.738921	0.0883033	0.745868	0.0897365
				0.558759	0.0722728	0.637566	0.0806188	0.720358	0.0890299	0.807335	0.0975064	0.898709	0.106049	0.994703	0.114658	0.847887	0.10155	0.847887	0.101366	0.847887	0.101735			0.619095	0.079343	0.638258	0.078228	0.648167	0.0807333	0.658606	0.0816696	0.707695	0.0860634	0.71855	0.0875145	0.74348	0.0880361	0.754931	0.0905484
				0.558806	0.0723004	0.637621	0.0806498	0.72042	0.0890642	0.807407	0.097544	0.898791	0.10609	0.994796	0.114702	0.8642	0.103076	0.8642	0.102889	0.8642	0.103264			0.617097	0.0784199	0.644557	0.0784169	0.65468	0.0807774	0.665449	0.0816225	0.714414	0.0863766	0.725824	0.0875957	0.750889	0.0880985	0.764626	0.0915066
				ConcTikEll	ConcTikEll	ConcTikEll	ConcTikEll	ConcTikEll	ConcTikEll	ConcTikEll	ConcTikEll	ConcTikEll	ConcTikEll	ConcTikEll	ConcTikEll	0.880658	0.104605	0.880658	0.104415	0.880658	0.104795			0.617167	0.0776904	0.65311	0.0789003	0.663518	0.0811235	0.674735	0.0818845	0.723539	0.0870038	0.735695	0.0880088	0.760946	0.0884889	0.774528	0.0925693
																0.89726	0.106135	0.89726	0.105942	0.89726	0.106328			0.619306	0.0771686	0.663682	0.0796649	0.67444	0.0817622	0.686208	0.0824485	0.734823	0.0879277	0.747895	0.0887425	0.773376	0.0891965	0.784204	0.0936901
																0.914009	0.107667	0.914009	0.107471	0.914009	0.107863			0.62347	0.0768648	0.675986	0.0806899	0.687147	0.0826761	0.699557	0.083299	0.747956	0.0891232	0.762092	0.089777	0.787841	0.090202	0.793233	0.09482
																0.930907	0.109202	0.930907	0.109003	0.930907	0.109401			0.629579	0.0767848	0.689685	0.0819473	0.701293	0.0838403	0.714418	0.0844129	0.762581	0.0905578	0.777897	0.0910838	0.803947	0.0914781	0.801219	0.0959096
																0.947953	0.110739	0.947953	0.110537	0.947953	0.11094			0.637514	0.0769302	0.704406	0.0834028	0.716493	0.0852229	0.730385	0.0857597	0.778298	0.0921921	0.79488	0.0926275	0.821253	0.0929899	0.807814	0.0969113
																0.96515	0.112277	0.96515	0.112073	0.96515	0.112482			0.647121	0.0772981	0.719747	0.0850168	0.732331	0.0867862	0.747022	0.0873028	0.79468	0.0939817	0.812577	0.0943658	0.839287	0.0946963	0.812729	0.0977813
																0.982498	0.113818	0.982498	0.113611	0.982498	0.114026			0.658212	0.0778815	0.73529	0.0867451	0.748377	0.0884877	0.763875	0.0890001	0.811279	0.0958778	0.830507	0.0962514	0.857559	0.0965505	0.815749	0.0984816
																1	0.115361	1	0.115151	1	0.115572			0.670572	0.0786688	0.750611	0.0885407	0.764191	0.090281	0.780486	0.0908052	0.827642	0.0978286	0.848179	0.0982328	0.875569	0.0985021	0.816742	0.0989815
																1	0.115361	1	0.115151	1	0.115572			0.68396	0.0796449	0.765292	0.0903546	0.779342	0.092117	0.796401	0.0926689	0.843324	0.0997809	0.865111	0.100256	0.892826	0.100498
																IsoLine	IsoLine	ConcBand	ConcBand	ConcBand	ConcBand			0.698116	0.0807908	0.778933	0.0921372	0.793418	0.0939457	0.811185	0.0945404	0.857895	0.101682	0.880842	0.102266	0.908859	0.102483
																								0.712763	0.082084	0.791161	0.0938401	0.806034	0.0957173	0.824436	0.0963686	0.87096	0.103479	0.894943	0.104207	0.923231	0.104404
																								0.727617	0.0834995	0.801643	0.0954166	0.816847	0.0973834	0.835791	0.0981036	0.882161	0.105123	0.907029	0.106028	0.935551	0.106208
																								0.74239	0.0850097	0.810093	0.0968239	0.825561	0.0988986	0.844942	0.0996982	0.891192	0.10657	0.916771	0.107677	0.945481	0.107846
																								0.756792	0.0865852	0.81628	0.0980235	0.831938	0.100221	0.851639	0.101109	0.897809	0.10778	0.923902	0.109111	0.952751	0.109274
																								0.770544	0.0881953	0.820037	0.0989827	0.835805	0.101316	0.855699	0.102297	0.90183	0.10872	0.928228	0.11029	0.957163	0.110451
																								0.783379	0.0898087	0.821259	0.0996753	0.837056	0.102152	0.85701	0.10323	0.903144	0.109365	0.929631	0.111181	0.958597	0.111347
																								0.795046	0.091394	Black	Black	Black	Black	Black	Black	Black	Black	Black	Black	Black	Black
																								0.805318	0.0929203
																								0.813996	0.094358
																								0.82091	0.095679
																								0.825927	0.0968577
																								0.828947	0.097871
																								0.829913	0.0986994
																								Black	Black

## Sheet: PlotDat6
Source sheet	all data	0.723393	0.0883647	0.637621	0.0806498	0.703532	0.087376	0.772097	0.0941442	0.843421	0.100954	0.58	0.0747086	0.58	0.0745746	0.58	0.0748426	0.573073	0.0739651	0.829913	0.0986994	0.821259	0.0996753	0.837056	0.102152	0.85701	0.10323	0.797376	0.0970483
Plot name	Concordia2	0.727148	0.0892106	0.637566	0.0806807	0.703471	0.0874097	0.772028	0.0941805	0.843345	0.100994	0.58	0.0747086	0.58	0.0745746	0.58	0.0748426	0.636279	0.0806498	0.828806	0.0993265	0.819914	0.100083	0.836049	0.10264	0.85595	0.103801	0.796496	0.0973896
Plot Type	1	0.739907	0.0918501	0.637408	0.0807091	0.703293	0.0874405	0.771829	0.0942139	0.843123	0.101029	0.5895	0.0757239	0.5895	0.075588	0.5895	0.0758598	0.702025	0.087376	0.825647	0.0997403	0.816039	0.100193	0.83317	0.102918	0.852924	0.104161	0.793972	0.0975454
1st free col	31	0.754965	0.0929539	0.637158	0.0807327	0.703012	0.0874662	0.771516	0.0942416	0.842775	0.101059	0.599057	0.0767401	0.599057	0.0766023	0.599057	0.0768779	0.770413	0.0941442	0.820498	0.0999327	0.809739	0.100004	0.828475	0.102981	0.847991	0.104302	0.789872	0.0975114
Sigma Level	2	IsoLine	IsoLine	0.636837	0.0807496	0.702651	0.0874846	0.771113	0.0942615	0.842326	0.101081	0.608672	0.0777573	0.608672	0.0776176	0.608672	0.0778969	0.841549	0.100954	0.813458	0.0998999	0.801187	0.0995209	0.822057	0.102827	0.841247	0.104223	0.784309	0.0972886
Absolute Errs	FALSE			0.63647	0.0807584	0.70224	0.0874941	0.770653	0.0942718	0.841815	0.101092	0.618345	0.0787754	0.618345	0.0786339	0.618345	0.078917	IsoLine	IsoLine	0.804666	0.0996427	0.790614	0.0987563	0.81404	0.102459	0.832824	0.103924	0.777433	0.096883
Symbol Type	1			0.636089	0.0807584	0.701811	0.0874941	0.770174	0.0942718	0.841283	0.101092	0.628075	0.0797945	0.628075	0.0796511	0.628075	0.079938			0.794292	0.0991659	0.778311	0.0977313	0.80458	0.101885	0.822886	0.103411	0.769432	0.0963057
Inverse Plot	FALSE			0.635722	0.0807496	0.7014	0.0874846	0.769714	0.0942615	0.840771	0.101081	0.637864	0.0808146	0.637864	0.0806692	0.637864	0.0809599			0.782538	0.0984788	0.764612	0.0964739	0.793861	0.101116	0.811626	0.102696	0.760526	0.0955725
Color Plot	FALSE			0.635401	0.0807327	0.701039	0.0874662	0.769311	0.0942416	0.840323	0.101059	0.647712	0.0818356	0.647712	0.0816884	0.647712	0.0819829			0.769632	0.0975949	0.749891	0.0950183	0.782092	0.100166	0.799263	0.10179	0.750955	0.0947034
3D plot	FALSE			0.635151	0.0807091	0.700758	0.0874405	0.768997	0.0942139	0.839974	0.101029	0.65762	0.0828576	0.65762	0.0827084	0.65762	0.0830068			0.755827	0.0965314	0.73455	0.0934044	0.769502	0.0990542	0.786037	0.100713	0.740983	0.093722
Linear	FALSE			0.634993	0.0806807	0.70058	0.0874097	0.768798	0.0941805	0.839753	0.100994	0.667586	0.0838806	0.667586	0.0837295	0.667586	0.0840316			0.74139	0.0953089	0.719007	0.091676	0.756336	0.0978023	0.772207	0.0994842	0.73088	0.0926551
Data Range	AC5:AG8			0.634938	0.0806498	0.700519	0.087376	0.76873	0.0941442	0.839677	0.100954	0.677613	0.0849045	0.677613	0.0847515	0.677613	0.0850575			0.726603	0.0939512	0.703685	0.0898804	0.74285	0.0964345	0.758041	0.0981286	0.720923	0.0915319
Filled Symbols	FALSE			0.634993	0.0806188	0.70058	0.0873424	0.768798	0.0941079	0.839753	0.100915	0.6877	0.0859294	0.6877	0.0857745	0.6877	0.0860843			0.711754	0.0924848	0.689004	0.0880666	0.729307	0.0949775	0.743816	0.0966723	0.711382	0.0903829
ConcAge	TRUE			0.635151	0.0805904	0.700758	0.0873116	0.768997	0.0940745	0.839974	0.100879	0.697848	0.0869552	0.697848	0.0867984	0.697848	0.0871121			0.697131	0.0909382	0.675364	0.0862839	0.71597	0.0934596	0.729807	0.0951437	0.702519	0.0892396
ConcSwap	FALSE			0.635401	0.0805668	0.701039	0.0872859	0.769311	0.0940468	0.840323	0.10085	0.708057	0.0879821	0.708057	0.0878233	0.708057	0.0881408			0.683019	0.0893415	0.663136	0.0845811	0.703099	0.0919104	0.716288	0.0935724	0.694575	0.0881331
1st Symbol-row	1			0.635722	0.0805499	0.7014	0.0872675	0.769714	0.0940269	0.840771	0.100828	0.718327	0.0890099	0.718327	0.0888492	0.718327	0.0891705			0.669693	0.0877258	0.652654	0.0830045	0.690944	0.09036	0.703522	0.0919891	0.687766	0.0870935
				0.636089	0.0805411	0.701811	0.087258	0.770174	0.0940166	0.841283	0.100817	0.728658	0.0900386	0.728658	0.089876	0.728658	0.0902012			0.657413	0.0861225	0.644204	0.0815973	0.679743	0.0888387	0.691757	0.0904245	0.682278	0.0861493
				0.63647	0.0805411	0.70224	0.087258	0.770653	0.0940166	0.841815	0.100817	0.739052	0.0910684	0.739052	0.0909038	0.739052	0.0912329			0.646416	0.0845629	0.638016	0.0803977	0.669712	0.0873759	0.681222	0.0889092	0.678262	0.0853262
				0.636837	0.0805499	0.702651	0.0872675	0.771113	0.0940269	0.842326	0.100828	0.749509	0.0920991	0.749509	0.0919326	0.749509	0.0922656			0.636918	0.0830773	0.63426	0.0794385	0.661048	0.0860002	0.672123	0.0874726	0.675826	0.0846466
				0.637158	0.0805668	0.703012	0.0872859	0.771516	0.0940468	0.842775	0.10085	0.760028	0.0931308	0.760028	0.0929623	0.760028	0.0932992			0.629103	0.0816945	0.633038	0.0787458	0.653919	0.0847384	0.664636	0.0861427	0.675037	0.0841292
				0.637408	0.0805904	0.703293	0.0873116	0.771829	0.0940745	0.843123	0.100879	0.770611	0.0941634	0.770611	0.093993	0.770611	0.0943338			0.623123	0.0804417	0.634382	0.0783386	0.648463	0.083615	0.658907	0.0849454	0.675916	0.0837879
				0.637566	0.0806188	0.703471	0.0873424	0.772028	0.0941079	0.843345	0.100915	0.781257	0.0951971	0.781257	0.0950247	0.781257	0.0953694			0.619095	0.079343	0.638258	0.078228	0.644788	0.0826519	0.655048	0.083904	0.67844	0.0836321
				0.637621	0.0806498	0.703532	0.087376	0.772097	0.0941442	0.843421	0.100954	0.791967	0.0962317	0.791967	0.0960574	0.791967	0.096406			0.617097	0.0784199	0.644557	0.0784169	0.642963	0.0818678	0.653134	0.0830387	0.68254	0.0836661
				ConcTikEll	ConcTikEll	ConcTikEll	ConcTikEll	ConcTikEll	ConcTikEll	ConcTikEll	ConcTikEll	0.802742	0.0972673	0.802742	0.097091	0.802742	0.0974435			0.617167	0.0776904	0.65311	0.0789003	0.643026	0.081278	0.653202	0.0823664	0.688104	0.0838889
												0.813581	0.0983038	0.813581	0.0981256	0.813581	0.098482			0.619306	0.0771686	0.663682	0.0796649	0.644974	0.080894	0.65525	0.0819002	0.69498	0.0842945
												0.824486	0.0993414	0.824486	0.0991612	0.824486	0.0995216			0.62347	0.0768648	0.675986	0.0806899	0.64877	0.0807232	0.659239	0.0816491	0.70298	0.0848718
												0.835456	0.10038	0.835456	0.100198	0.835456	0.100562			0.629579	0.0767848	0.689685	0.0819473	0.65434	0.080769	0.665092	0.081618	0.711887	0.085605
												0.846492	0.101419	0.846492	0.101235	0.846492	0.101604			0.637514	0.0769302	0.704406	0.0834028	0.661575	0.0810305	0.672693	0.0818076	0.721457	0.0864741
												0.857594	0.10246	0.857594	0.102274	0.857594	0.102646			0.647121	0.0772981	0.719747	0.0850168	0.670335	0.0815026	0.681897	0.0822142	0.731429	0.0874555
												0.868764	0.103501	0.868764	0.103313	0.868764	0.103689			0.658212	0.0778815	0.73529	0.0867451	0.680449	0.082176	0.692522	0.0828297	0.741532	0.0885224
												0.88	0.104544	0.88	0.104354	0.88	0.104734			0.670572	0.0786688	0.750611	0.0885407	0.691721	0.0830378	0.704362	0.0836424	0.75149	0.0896456
												0.88	0.104544	0.88	0.104354	0.88	0.104734			0.68396	0.0796449	0.765292	0.0903546	0.70393	0.0840711	0.717188	0.0846363	0.76103	0.0907945
												IsoLine	IsoLine	ConcBand	ConcBand	ConcBand	ConcBand			0.698116	0.0807908	0.778933	0.0921372	0.71684	0.0852558	0.730749	0.085792	0.769894	0.0919379
																				0.712763	0.082084	0.791161	0.0938401	0.730198	0.0865688	0.744781	0.0870872	0.777838	0.0930444
																				0.727617	0.0834995	0.801643	0.0954166	0.743746	0.0879847	0.759011	0.0884966	0.784647	0.094084
																				0.74239	0.0850097	0.810093	0.0968239	0.757219	0.0894758	0.773163	0.0899927	0.790134	0.0950282
																				0.756792	0.0865852	0.81628	0.0980235	0.770354	0.091013	0.78696	0.0915464	0.794151	0.0958513
																				0.770544	0.0881953	0.820037	0.0989827	0.782898	0.0925666	0.800135	0.0931276	0.796587	0.0965308
																				0.783379	0.0898087	0.821259	0.0996753	0.794604	0.0941063	0.81243	0.0947054	0.797376	0.0970483
																				0.795046	0.091394	Black	Black	0.805246	0.095602	0.823607	0.096249
																				0.805318	0.0929203			0.814616	0.0970247	0.833448	0.0977286
																				0.813996	0.094358			0.822532	0.0983466	0.841762	0.0991152
																				0.82091	0.095679			0.82884	0.0995422	0.848386	0.100382
																				0.825927	0.0968577			0.833417	0.100588	0.853191	0.101504
																				0.828947	0.097871			0.836173	0.101464	0.856085	0.10246
																				0.829913	0.0986994			0.837056	0.102152	0.85701	0.10323
																				Black	Black			Black	Black	Black	Black

## Sheet: PlotDat7
Source sheet	all data	0.414542	0.0566687	0.3	0.042188	0.343738	0.0476374	0.468568	0.0630913	0.504114	0.0670592	0.479266	0.0640865	0.723393	0.0883647	0.829913	0.0986994	0.821259	0.0996753	0.837056	0.102152	0.85701	0.10323	0.723393	0.0883647	0.797376	0.0970483	0.736206	0.0905887	0.802642	0.0978842	0.903144	0.109365	0.929631	0.111181	0.958597	0.111347	0.956911	0.112962	0.974301	0.113638	1.01837	0.118713	1.03261	0.118077	1.04977	0.11996	1.02419	0.118855
Plot name	Concordia3	0.447493	0.0599438	0.307722	0.0431638	0.411563	0.0557947	0.467326	0.0634638	0.50283	0.0672805	0.478166	0.0643325	0.727148	0.0892106	0.828377	0.0994191	0.819125	0.100141	0.835658	0.102708	0.855539	0.103883	0.727148	0.0892106	0.795982	0.0974495	IsoLine	IsoLine	0.821073	0.0997645	0.900878	0.10973	0.928073	0.111762	0.957013	0.111937	0.954499	0.113187	0.972683	0.114256	1.01582	0.119048	1.03061	0.119215	1.04709	0.120458	1.02234	0.119802
Plot Type	1	IsoLine	IsoLine	0.325608	0.0453982	0.482812	0.0640155	0.463778	0.0635394	0.499127	0.0671811	0.475008	0.064308	0.739907	0.0918501	0.823977	0.0998373	0.812972	0.10013	0.831647	0.102967	0.851324	0.104238	0.739907	0.0918501	0.791975	0.0975509			0.847967	0.10012	0.894318	0.109578	0.923596	0.112015	0.952454	0.112204	0.947481	0.112864	0.96803	0.114545	1.00844	0.118818	1.02489	0.120022	1.03931	0.120382	1.01703	0.12041
1st free col	151			0.343738	0.0476374	0.557657	0.0723004	0.458077	0.0633147	0.493167	0.0667654	0.469929	0.0640141	0.754965	0.0929539	0.816833	0.0999425	0.803067	0.0996406	0.825134	0.102923	0.84448	0.104285	0.754965	0.0929539	0.785532	0.097348			0.849112	0.100649	0.883751	0.108915	0.916323	0.111933	0.945045	0.112141	0.936164	0.112007	0.960469	0.114498	0.99654	0.118034	1.01559	0.120476	1.02678	0.119735	1.0084	0.120664
Sigma Level	2			0.362116	0.0498813	0.636279	0.0806498	0.450474	0.0627995	0.485211	0.0660516	0.463151	0.0634637	IsoLine	IsoLine	0.807141	0.0997319	0.789845	0.0986958	0.816296	0.102577	0.835195	0.104023	IsoLine	IsoLine	0.776932	0.0968497			0.861415	0.102202	0.86964	0.107769	0.906452	0.11152	0.934988	0.111751	0.921042	0.110654	0.950205	0.114115	0.980642	0.116728	1.00297	0.120565	1.01005	0.118546	0.996699	0.120555
Absolute Errs	FALSE			0.380745	0.0521301	0.718871	0.0890642	0.441301	0.0620164	0.475606	0.0650708	0.454971	0.0626807			0.795164	0.0992113	0.773882	0.0973364	0.805375	0.101938	0.823721	0.103459			0.766553	0.0960777			0.905084	0.106123	0.8526	0.106192	0.894252	0.110787	0.922558	0.111043	0.902776	0.108863	0.93752	0.113407	0.961443	0.11496	0.987382	0.120287	0.989839	0.116866	0.982239	0.120087
Symbol Type	1			0.399629	0.0543837	0.805631	0.097544	0.430958	0.0609995	0.464773	0.063866	0.445746	0.0616995			0.781229	0.0983948	0.755877	0.0956219	0.792668	0.101024	0.810372	0.102609			0.754847	0.0950659			0.893884	0.107082	0.833377	0.104251	0.880055	0.109752	0.908092	0.110038	0.882166	0.106714	0.922759	0.112394	0.93978	0.112805	0.969239	0.119648	0.967042	0.114769	0.965413	0.119273
Inverse Plot	FALSE			0.418772	0.0566422	0.89677	0.10609	0.419897	0.0597934	0.453185	0.0624897	0.43588	0.0605628			0.765717	0.0973047	0.736616	0.0936272	0.778521	0.0998599	0.795512	0.101495			0.742326	0.0938584			0.930587	0.107324	0.812811	0.102033	0.86425	0.108445	0.891987	0.108762	0.86011	0.104299	0.906324	0.111102	0.916601	0.110358	0.94904	0.118666	0.942653	0.112347	0.946683	0.118135
Color Plot	FALSE			0.438176	0.0589054	0.99251	0.114702	0.408603	0.0584507	0.441348	0.0610022	0.425802	0.0593204			0.74905	0.0959707	0.716942	0.0914395	0.763321	0.0984773	0.779545	0.100148			0.729538	0.092508			0.89556	0.107392	0.7918	0.0996326	0.847267	0.106902	0.874681	0.10725	0.837574	0.101725	0.888665	0.109568	0.892918	0.107726	0.927337	0.117368	0.917735	0.109705	0.926557	0.116704
3D plot	FALSE			0.457846	0.0611736	IsoLine	IsoLine	0.397568	0.0570302	0.429779	0.0594684	0.415955	0.0580266			0.731684	0.0944293	0.697713	0.0891543	0.747483	0.0969139	0.762908	0.0986051			0.717042	0.0910737			0.926784	0.108542	0.771263	0.0971561	0.829569	0.105163	0.856646	0.105544	0.815542	0.0991036	0.870262	0.107833	0.869767	0.105024	0.904721	0.11579	0.89338	0.10696	0.905587	0.115019
Linear	FALSE			0.477784	0.0634465			0.387275	0.0555938	0.418985	0.0579554	0.406768	0.0567379			0.714091	0.0927224	0.679771	0.0868716	0.731438	0.0952124	0.746054	0.0969078			0.705383	0.0896182			0.958333	0.110102	0.752098	0.0947115	0.81164	0.103278	0.838375	0.103689	0.794978	0.09655	0.851618	0.105944	0.84816	0.10237	0.88181	0.113974	0.870651	0.10423	0.884343	0.113126
Data Range	AC3:AG4			0.497996	0.0657244			0.378173	0.0542044	0.409437	0.0565293	0.398643	0.0555107			0.696752	0.0908967	0.6639	0.0846912	0.715624	0.0934191	0.729444	0.0951027			0.695071	0.0882051			0.915247	0.110139	0.735141	0.0924055	0.793968	0.101296	0.820365	0.101738	0.776779	0.0941755	0.833241	0.103953	0.82904	0.0998797	0.859228	0.11197	0.850541	0.101635	0.863404	0.111076
Filled Symbols	FALSE			0.518484	0.0680071			0.370661	0.0529227	0.401551	0.0552524	0.391934	0.0543985			0.68014	0.0890019	0.650793	0.0827082	0.700472	0.0915831	0.713529	0.093239			0.686557	0.0868962			0.960767	0.110269	0.721135	0.090339	0.777036	0.0992731	0.803108	0.099742	0.761741	0.0920839	0.815632	0.101915	0.813244	0.0976627	0.837591	0.109833	0.833929	0.0992896	0.843343	0.108926
ConcAge	TRUE			0.539252	0.0702947			0.365067	0.0518048	0.395674	0.0541805	0.386936	0.05345			0.664707	0.0870897	0.641023	0.0810095	0.686396	0.0897544	0.698745	0.0913675			0.680213	0.0857487			0.941745	0.110799	0.710691	0.0886023	0.761304	0.0972633	0.787075	0.0977566	0.750523	0.0903666	0.799273	0.0998839	0.801462	0.0958154	0.81749	0.107621	0.821542	0.0972948	0.824707	0.106734
ConcSwap	FALSE			0.560304	0.0725872			0.361635	0.0508994	0.392061	0.0533606	0.383866	0.0527067			0.650875	0.0852123	0.635017	0.0796691	0.67378	0.0879828	0.685494	0.0895393			0.676316	0.0848127			0.934691	0.111686	0.704265	0.0872712	0.747203	0.0953217	0.772702	0.0958356	0.743612	0.0890987	0.784608	0.0979163	0.794208	0.0944187	0.799473	0.105394	0.813921	0.0957384	0.808003	0.10456
1st Symbol-row	1			0.581644	0.0748847			0.360515	0.0502461	0.390871	0.0528283	0.382859	0.0522009			0.639022	0.0834209	0.633038	0.0787458	0.662967	0.0863167	0.674138	0.0878042			0.675037	0.0841292			0.959104	0.11226	0.70214	0.0864039	0.735117	0.0935014	0.760383	0.0940315	0.741313	0.0883356	0.772039	0.0960656	0.791801	0.0935335	0.784031	0.103213	0.811399	0.0946884	0.793687	0.102463
				0.603276	0.077187			0.361757	0.0498736	0.392156	0.0526071	0.383959	0.0519549			0.62947	0.0817643	0.635172	0.0782798	0.654254	0.0848016	0.664987	0.0862096			0.676431	0.0837279			0.995208	0.113766	0.704406	0.0860384	0.725376	0.0918518	0.750453	0.0923935	0.743725	0.0881107	0.761907	0.0943823	0.794344	0.0931986	0.771586	0.101138	0.814085	0.0941906	0.78215	0.100501
				0.625203	0.0794943			0.365305	0.049798	0.395859	0.0527064	0.387118	0.0519794			0.622479	0.0802878	0.641325	0.0782916	0.647876	0.0834787	0.658291	0.084799			0.680437	0.0836266			1.01706	0.113878	0.710966	0.0861906	0.718245	0.0904181	0.743182	0.0909662	0.750743	0.0884337	0.75449	0.0929123	0.801727	0.0934285	0.762476	0.099225	0.821863	0.0942667	0.773707	0.0987266
				0.647431	0.0818065			0.371006	0.0500227	0.401819	0.0531221	0.392196	0.0522733			0.618242	0.0790316	0.65123	0.0787806	0.644009	0.0823841	0.654231	0.0836108			0.686881	0.0838295			0.991188	0.116185	0.721533	0.0868539	0.713919	0.0892394	0.73877	0.0897886	0.762061	0.0892905	0.749989	0.0916957	0.813628	0.0942133	0.756951	0.0975263	0.834393	0.0949136	0.768587	0.0971887
				0.669963	0.0841237			0.378609	0.0505379	0.409775	0.053836	0.398974	0.0528237			0.616873	0.07803	0.664452	0.0797254	0.642758	0.0815478	0.652919	0.0826775			0.695481	0.0843278			1.00746	0.116293	0.735644	0.0879993	0.712516	0.0883477	0.737337	0.0888928	0.777182	0.0906438	0.748528	0.0907656	0.829525	0.0955186	0.755161	0.0960882	0.851127	0.0961029	0.766931	0.095929
				0.692802	0.0864458			0.387783	0.051321	0.419379	0.0548167	0.407154	0.0536067			0.618409	0.0773102	0.680415	0.0810848	0.644157	0.0809925	0.654391	0.0820245			0.70586	0.0850997			1.05845	0.118556	0.752684	0.0895767	0.714074	0.0877675	0.738921	0.0883033	0.795448	0.0924344	0.750146	0.0901476	0.848725	0.0972874	0.757155	0.09495	0.871334	0.0977826	0.768784	0.094982
				0.715954	0.0887729			0.398126	0.0523379	0.430212	0.0560216	0.416379	0.0545879			0.622809	0.0768921	0.69842	0.0827993	0.648167	0.0807333	0.658606	0.0816696			0.717566	0.0861116			1.05042	0.118736	0.771907	0.0915171	0.71855	0.0875145	0.74348	0.0880361	0.816059	0.0945839	0.754799	0.0898583	0.870387	0.0994424	0.762879	0.0941427	0.894131	0.0998793	0.774095	0.0943736
				0.739423	0.091105			0.409186	0.053544	0.441801	0.0573978	0.426246	0.0557246			0.629953	0.0767868	0.717681	0.084794	0.65468	0.0807774	0.665449	0.0816225			0.730086	0.0873191			1.04195	0.119064	0.792473	0.0937359	0.725824	0.0875957	0.750889	0.0880985	0.838114	0.0969985	0.762361	0.0899057	0.893567	0.101889	0.772176	0.0936884	0.91852	0.102301	0.782719	0.0941202
				0.763213	0.0934421			0.420481	0.0548867	0.453638	0.0588854	0.436323	0.056967			0.639645	0.0769974	0.737355	0.0869817	0.663518	0.0811235	0.674735	0.0818845			0.742874	0.0886695			1.03008	0.120253	0.813484	0.0961359	0.735695	0.0880088	0.760946	0.0884889	0.86065	0.0995726	0.772624	0.0902885	0.917249	0.104521	0.784793	0.0935994	0.943438	0.104943	0.794421	0.0942289
				0.787328	0.0957842			0.431516	0.0563072	0.465206	0.0604192	0.44617	0.0582608			0.651622	0.077518	0.756583	0.0892668	0.67444	0.0817622	0.686208	0.0824485			0.755371	0.0901038			1.04173	0.121832	0.834021	0.0986124	0.747895	0.0887425	0.773376	0.0891965	0.882682	0.102194	0.785309	0.0909963	0.9404	0.107223	0.800386	0.0938783	0.967793	0.107689	0.808882	0.0946966
				0.811773	0.0981313			0.441809	0.0577436	0.476001	0.0619322	0.455357	0.0595495			0.665556	0.0783345	0.774525	0.0915495	0.687147	0.0826761	0.699557	0.083299			0.76703	0.0915593			1.07907	0.121887	0.853187	0.101057	0.762092	0.089777	0.787841	0.090202	0.903247	0.104747	0.80007	0.0920098	0.962008	0.109877	0.818529	0.0945173	0.990522	0.110419	0.825707	0.0955106
				0.836552	0.100483			0.45091	0.059133	0.485549	0.0633583	0.463483	0.0607767			0.681069	0.0794247	0.790397	0.09373	0.701293	0.0838403	0.714418	0.0844129			0.777341	0.0929724			1.06831	0.123506	0.870143	0.103363	0.777897	0.0910838	0.803947	0.0914781	0.921445	0.107122	0.816505	0.0933012	0.981127	0.112367	0.838727	0.095499	1.01063	0.113013	0.844437	0.0966486
				0.861671	0.102841			0.458422	0.0604147	0.493434	0.0646352	0.470191	0.0618889			0.697735	0.0807586	0.803504	0.0957129	0.716493	0.0852229	0.730385	0.0857597			0.785855	0.0942813			1.08382	0.125471	0.884149	0.105429	0.79488	0.0926275	0.821253	0.0929899	0.936483	0.109214	0.834165	0.0948355	0.996923	0.114584	0.860431	0.0967967	1.02724	0.115359	0.864563	0.0980798
				0.887132	0.105203			0.464016	0.0615327	0.499312	0.065707	0.475189	0.0628374			0.715102	0.0823001	0.813274	0.0974117	0.732331	0.0867862	0.747022	0.0873028			0.7922	0.0954288			1.16945	0.128893	0.894593	0.107166	0.812577	0.0943658	0.839287	0.0946963	0.947702	0.110931	0.852567	0.0965706	1.00871	0.116432	0.883046	0.098375	1.03963	0.117354	0.885533	0.0997649
				0.912942	0.10757			0.467448	0.0624381	0.502924	0.066527	0.478259	0.0635807			0.732695	0.0840069	0.81928	0.098752	0.748377	0.0884877	0.763875	0.0890001			0.796096	0.0963648			1.22619	0.130794	0.901019	0.108497	0.830507	0.0962514	0.857559	0.0965505	0.954612	0.112199	0.871212	0.0984594	1.01596	0.117828	0.905957	0.100191	1.04725	0.11891	0.906777	0.101658
				0.939105	0.109942			0.468568	0.0630913	0.504114	0.0670592	0.479266	0.0640865			0.750034	0.0858327	0.821259	0.0996753	0.764191	0.090281	0.780486	0.0908052			0.797376	0.0970483			1.21332	0.13448	0.903144	0.109365	0.848179	0.0982328	0.875569	0.0985021	0.956911	0.112962	0.889589	0.10045	1.01837	0.118713	0.928539	0.102195	1.04977	0.11996	0.927716	0.103708
				0.965626	0.11232			Black	Black	Black	Black					0.766646	0.0877275	Black	Black	0.779342	0.092117	0.796401	0.0926689							1.37681	0.143793	Black	Black	0.865111	0.100256	0.892826	0.100498	Black	Black	0.907197	0.102489	Black	Black	0.950176	0.104332	Black	Black	0.947777	0.105858
				0.99251	0.114702											0.782079	0.0896396			0.793418	0.0939457	0.811185	0.0945404							1.33651	0.146203			0.880842	0.102266	0.908859	0.102483			0.923557	0.10452			0.970277	0.106544			0.966413	0.10805
				1	0.115359											0.79591	0.091517			0.806034	0.0957173	0.824436	0.0963686							1.38516	0.147605			0.894943	0.104207	0.923231	0.104404			0.938221	0.106487			0.988294	0.108771			0.983118	0.110224
				IsoLine	IsoLine											0.807764	0.0933084			0.816847	0.0973834	0.835791	0.0981036							1.74415	0.175966			0.907029	0.106028	0.935551	0.106208			0.950791	0.108338			1.00374	0.110951			0.997433	0.11232
																0.817316	0.094965			0.825561	0.0988986	0.844942	0.0996982							1.69245	0.169613			0.916771	0.107677	0.945481	0.107846			0.960922	0.110021			1.01618	0.113027			1.00897	0.114283
																0.824306	0.0964415			0.831938	0.100221	0.851639	0.101109							1.74917	0.173715			0.923902	0.109111	0.952751	0.109274			0.968339	0.111491			1.02529	0.11494			1.01741	0.116057
																0.828544	0.0976977			0.835805	0.101316	0.855699	0.102297							1.89996	0.181795			0.928228	0.11029	0.957163	0.110451			0.97284	0.112708			1.03082	0.116639			1.02253	0.117595
																0.829913	0.0986994			0.837056	0.102152	0.85701	0.10323							3.17187	0.246774			0.929631	0.111181	0.958597	0.111347			0.974301	0.113638			1.03261	0.118077			1.02419	0.118855
																Black	Black			Black	Black	Black	Black							3.93297	0.297803			Black	Black	Black	Black			Black	Black			Black	Black			Black	Black
																														4.5611	0.314754
																														4.80694	0.3046
																														5.34181	0.327387
																														6.54387	0.39073
																														5.82798	0.347042
																														6.78209	0.389679
																														10.0524	0.449723
																														9.69271	0.428782
																														11.3577	0.486281
																														11.059	0.463226
																														IsoLine	IsoLine
[truncated: 100 more columns]

## Sheet: PlotDat9
Source sheet	all data	0.414542	0.0566687	0	0	0.217708	0.0315113	0.468568	0.0630913	0.504114	0.0670592	0.829913	0.0986994	0.821259	0.0996753	0.837056	0.102152	0.85701	0.10323	0.903144	0.109365	0.929631	0.111181	0.958597	0.111347	0.956911	0.112962	0.974301	0.113638	1.01837	0.118713	1.03261	0.118077	1.04977	0.11996	1.02419	0.118855	1.0441	0.12144	1.08593	0.122808	1.03431	0.123119	1.08417	0.123395	1.06121	0.12413	1.05426	0.124875
Plot name	Concordia4	0.447493	0.0599438	0.110692	0.0166736	0.482812	0.0640155	0.466297	0.0635261	0.501757	0.0672815	0.825455	0.0997539	0.817342	0.100193	0.832995	0.102926	0.85274	0.104172	0.898978	0.109735	0.925101	0.111979	0.953987	0.112163	0.952468	0.113132	0.969594	0.1145	1.01369	0.11903	1.02681	0.119836	1.04484	0.120497	1.01881	0.120279	1.03925	0.12184	1.08063	0.123689	1.02936	0.123764	1.07907	0.123897	1.05628	0.12446	1.0493	0.125406
Plot Type	1	0.723393	0.0883647	0.233637	0.0336251	0.805631	0.097544	0.459833	0.0634054	0.495003	0.0669094	0.812729	0.0998858	0.806118	0.0998204	0.821392	0.102802	0.840549	0.104204	0.887007	0.109145	0.912144	0.111786	0.940787	0.112004	0.939652	0.112292	0.956123	0.114365	1.00021	0.118301	1.01025	0.120563	1.03064	0.119967	1.00345	0.120659	1.02528	0.121163	1.06541	0.12347	1.01516	0.123305	1.06437	0.123295	1.04206	0.123684	1.03505	0.124825
1st free col	131	0.727148	0.0892106	0.370191	0.0508594	1.19873	0.132129	0.4497	0.062739	0.4844	0.0659729	0.792765	0.0990843	0.788497	0.0985885	0.803188	0.101792	0.821424	0.103325	0.868201	0.107643	0.891808	0.11062	0.920068	0.110882	0.9195	0.110508	0.93498	0.113245	0.979022	0.116586	0.984259	0.120197	1.00834	0.118412	0.979343	0.119964	1.00334	0.119463	1.04152	0.122167	0.992872	0.121779	1.04129	0.121637	1.01972	0.121864	1.01268	0.12318
Sigma Level	2	0.739907	0.0918501	0.521861	0.0683809	1.67741	0.167804	0.436718	0.0615807	0.470807	0.064548	0.767181	0.0974143	0.765905	0.0965969	0.779857	0.0999752	0.796915	0.101606	0.844084	0.10535	0.865742	0.108574	0.893508	0.108888	0.893646	0.107925	0.907876	0.11123	0.951846	0.114023	0.950947	0.118769	0.97974	0.115959	0.948451	0.118251	0.975192	0.116878	1.01089	0.119887	0.964294	0.11931	1.01168	0.119059	0.991061	0.119148	0.983982	0.120603
Absolute Errs	FALSE	0.754965	0.0929539	0.690319	0.0861946	2.2603	0.204603	0.42194	0.0600245	0.455326	0.0627501	0.73805	0.0950113	0.740174	0.0940069	0.753289	0.0975007	0.769007	0.0991863	0.81661	0.102452	0.836057	0.105815	0.863258	0.106184	0.864185	0.104753	0.877008	0.108484	0.920883	0.11082	0.913012	0.116394	0.947158	0.112807	0.913275	0.115658	0.943123	0.113619	0.976004	0.116815	0.931742	0.116099	0.977943	0.115768	0.958406	0.115755	0.951294	0.117305
Symbol Type	1	0.802642	0.0978842	0.877425	0.104305	2.97009	0.242562	0.406563	0.0581965	0.439209	0.0607248	0.707731	0.0920697	0.713387	0.0910283	0.725638	0.0945684	0.739962	0.0962613	0.788004	0.0991848	0.805159	0.102565	0.831769	0.102988	0.833502	0.101248	0.844878	0.105229	0.888639	0.107236	0.873527	0.113264	0.913234	0.109211	0.876663	0.112396	0.909731	0.109947	0.939686	0.113198	0.897854	0.112404	0.942818	0.112032	0.924401	0.111961	0.917262	0.11355
Inverse Plot	FALSE	0.821073	0.0997645	1.08524	0.122718	3.83441	0.281716	0.391832	0.0562446	0.423764	0.0586363	0.678681	0.088828	0.687715	0.0879025	0.699142	0.0914158	0.712132	0.0930684	0.760584	0.0958118	0.775549	0.099089	0.801593	0.0995603	0.804084	0.0976951	0.814087	0.101729	0.857728	0.103562	0.835692	0.109634	0.880715	0.105461	0.841582	0.108727	0.87772	0.106162	0.904878	0.109331	0.865376	0.108526	0.909147	0.108154	0.891802	0.108073	0.884641	0.109645
Color Plot	FALSE	0.847967	0.10012	1.31606	0.141438	4.8869	0.322105	0.37894	0.0543272	0.410242	0.0566537	0.653253	0.0855487	0.665238	0.0848826	0.675949	0.0882984	0.687772	0.0898662	0.736571	0.0926067	0.749628	0.0956673	0.775174	0.0961777	0.778314	0.0943811	0.78713	0.0982669	0.830653	0.100096	0.802571	0.105797	0.852237	0.101863	0.810875	0.104951	0.849684	0.10257	0.8744	0.105526	0.836937	0.104779	0.879658	0.104446	0.863249	0.104405	0.856075	0.105905
3D plot	FALSE	0.849112	0.100649	1.57243	0.16047	6.16853	0.363766	0.368933	0.0525994	0.399737	0.0549376	0.633508	0.0824976	0.647777	0.0822134	0.657938	0.0854688	0.668856	0.0869142	0.717911	0.0898292	0.729495	0.0925774	0.754651	0.0931145	0.758279	0.0915749	0.766191	0.0951236	0.809608	0.0971185	0.776847	0.102065	0.830106	0.0987068	0.787028	0.101373	0.827894	0.0994616	0.850723	0.102092	0.814843	0.101466	0.856739	0.10121	0.841054	0.101256	0.833878	0.102634
Linear	FALSE	0.861415	0.102202	1.85718	0.179819	7.72917	0.40674	0.362621	0.0512013	0.393101	0.0536271	0.621044	0.0799218	0.636745	0.080111	0.646567	0.0831561	0.656916	0.0844514	0.706115	0.0877042	0.716781	0.0900699	0.741689	0.0906188	0.745603	0.0895038	0.752967	0.0925538	0.796298	0.0948702	0.760606	0.0987384	0.816115	0.0962489	0.771973	0.0982819	0.814116	0.0970888	0.835763	0.0993071	0.800883	0.0988553	0.842249	0.0987087	0.827018	0.0988796	0.819849	0.100096
Data Range	AC3:AG63	0.905084	0.106123	2.17345	0.199491	9.62957	0.451068	0.360515	0.0502461	0.390871	0.0528283	0.616873	0.07803	0.633038	0.0787458	0.642758	0.0815478	0.652919	0.0826775	0.70214	0.0864039	0.712516	0.0883477	0.737337	0.0888928	0.741313	0.0883356	0.748528	0.0907656	0.791801	0.0935335	0.755161	0.0960882	0.811399	0.0946884	0.766931	0.095929	0.809465	0.095644	0.830734	0.0973966	0.796187	0.097159	0.83736	0.0971434	0.822276	0.0974691	0.815123	0.0984964
Filled Symbols	FALSE	0.893884	0.107082	2.52472	0.21949	11.9437	0.496793	0.362786	0.0498113	0.393229	0.052606	0.62133	0.0769754	0.636955	0.0782284	0.646819	0.0807741	0.65719	0.0817361	0.706306	0.0860337	0.717046	0.0875505	0.741947	0.0880764	0.745756	0.088165	0.753235	0.0899039	0.796481	0.0932168	0.760955	0.0943286	0.816338	0.0941515	0.77231	0.0945048	0.814319	0.095244	0.836041	0.0965154	0.801138	0.0965143	0.842469	0.0966415	0.827212	0.0971386	0.820084	0.0979657
ConcAge	FALSE	0.930587	0.107324	2.91488	0.239824	14.7617	0.543959	0.36925	0.049932	0.399983	0.0529782	0.634057	0.0768435	0.648178	0.0786007	0.658422	0.0808977	0.669381	0.0817035	0.718277	0.0866236	0.730003	0.0877428	0.755147	0.0882357	0.758573	0.0890056	0.766706	0.0900385	0.80996	0.0939458	0.777518	0.0936023	0.830533	0.0946818	0.787673	0.0941247	0.828284	0.0959214	0.851256	0.0967349	0.815333	0.0969733	0.857161	0.0972437	0.841427	0.0979147	0.834329	0.0985465
ConcSwap	FALSE	0.89556	0.107392	3.34823	0.260496	18.1931	0.592611	0.379384	0.0505985	0.410586	0.0539147	0.65402	0.077645	0.6658	0.0798326	0.676627	0.0819086	0.688506	0.0825824	0.737083	0.0881257	0.750339	0.088909	0.775866	0.0893578	0.778724	0.0907896	0.78785	0.0911585	0.831146	0.0956613	0.803508	0.093968	0.852833	0.0962363	0.811777	0.0948193	0.850228	0.0976213	0.875146	0.0980374	0.837622	0.098499	0.880247	0.0989011	0.86377	0.0997348	0.856706	0.100192
1st Symbol-row	1	0.926784	0.108542	3.82955	0.281513	IsoLine	IsoLine	0.392365	0.0517567	0.424179	0.0553396	0.679604	0.079315	0.688391	0.0818242	0.699958	0.0837249	0.713015	0.0843015	0.7612	0.0904185	0.776405	0.0909546	0.802426	0.0913518	0.804578	0.0933722	0.814953	0.0931732	0.858321	0.0982244	0.83682	0.0953962	0.881433	0.0986891	0.842669	0.0965325	0.878375	0.100206	0.905775	0.100317	0.8662	0.100968	0.909857	0.10148	0.892429	0.102451	0.8854	0.102768
		0.958333	0.110102	4.36414	0.30288			0.407143	0.0533129	0.43966	0.0571375	0.708736	0.0817181	0.714123	0.0844142	0.726525	0.0861994	0.740923	0.0867216	0.788674	0.093316	0.80609	0.093714	0.832676	0.0940561	0.834039	0.0965444	0.845821	0.0959193	0.889285	0.101427	0.874755	0.0977712	0.914015	0.101841	0.877846	0.0991255	0.910444	0.103466	0.940662	0.10339	0.898751	0.104179	0.943591	0.10477	0.925084	0.105844	0.918087	0.106067
		0.915247	0.110139	4.95791	0.324604			0.422521	0.055141	0.455776	0.0591628	0.739054	0.0846596	0.740909	0.0873928	0.754177	0.0891318	0.769968	0.0896465	0.81728	0.0965836	0.836988	0.0969636	0.864164	0.0972517	0.864722	0.100049	0.877952	0.0991744	0.921528	0.105011	0.91424	0.1009	0.947939	0.105438	0.914457	0.102388	0.943836	0.107137	0.976981	0.107006	0.932639	0.107874	0.978716	0.108506	0.959088	0.109638	0.95212	0.109821
		0.960767	0.110269	5.6174	0.34669			0.437252	0.0570928	0.471221	0.0612513	0.768104	0.0879014	0.766581	0.0905187	0.780672	0.0922843	0.797798	0.0928395	0.8447	0.0999567	0.866598	0.10044	0.894341	0.10068	0.89414	0.103602	0.908743	0.102675	0.95244	0.108685	0.952075	0.104531	0.980458	0.109187	0.949538	0.106056	0.975847	0.110922	1.01179	0.110874	0.965118	0.111752	1.01239	0.112385	0.991688	0.113526	0.984741	0.113726
		0.941745	0.110799	6.3499	0.369144			0.450143	0.0590103	0.484744	0.0632339	0.793532	0.0911806	0.789058	0.0935385	0.803865	0.0954017	0.822157	0.0960417	0.868713	0.103162	0.892519	0.103862	0.92076	0.104062	0.91991	0.106916	0.9357	0.106137	0.979515	0.112151	0.985196	0.108367	1.00894	0.112786	0.980246	0.109832	1.00388	0.114514	1.04227	0.114678	0.993556	0.115499	1.04188	0.116092	1.02024	0.117194	1.01331	0.117466
		0.934691	0.111686	7.16348	0.391972			0.46015	0.060738	0.495249	0.06495	0.813278	0.0942317	0.80652	0.0962078	0.821877	0.0982313	0.841073	0.0989937	0.887373	0.105939	0.912652	0.106952	0.941282	0.107125	0.939945	0.109722	0.956638	0.10928	1.00056	0.115129	1.01092	0.1121	1.03107	0.115942	1.00409	0.113411	1.02567	0.117623	1.06594	0.118112	1.01565	0.118812	1.06479	0.119328	1.04244	0.120343	1.0355	0.120738
		0.959104	0.11226	8.06711	0.415182			0.466462	0.0621361	0.501885	0.0662605	0.825741	0.0968075	0.817552	0.0983102	0.833248	0.100544	0.853014	0.101456	0.899169	0.108064	0.925366	0.109459	0.954245	0.109621	0.952621	0.111794	0.969863	0.11185	1.01387	0.117377	1.02716	0.115426	1.04506	0.1184	1.01915	0.116502	1.03945	0.119996	1.0809	0.120898	1.02961	0.121423	1.07929	0.12183	1.05647	0.122719	1.04953	0.123276
		0.995208	0.113766	9.07077	0.438778			0.468568	0.0630913	0.504114	0.0670592	0.829913	0.0986994	0.821259	0.0996753	0.837056	0.102152	0.85701	0.10323	0.903144	0.109365	0.929631	0.111181	0.958597	0.111347	0.956911	0.112962	0.974301	0.113638	1.01837	0.118713	1.03261	0.118077	1.04977	0.11996	1.02419	0.118855	1.0441	0.12144	1.08593	0.122808	1.03431	0.123119	1.08417	0.123395	1.06121	0.12413	1.05426	0.124875
		1.01706	0.113878	10.1855	0.462767			Black	Black	Black	Black	Black	Black	Black	Black	Black	Black	Black	Black	Black	Black	Black	Black	Black	Black	Black	Black	Black	Black	Black	Black	Black	Black	Black	Black	Black	Black	Black	Black	Black	Black	Black	Black	Black	Black	Black	Black	Black	Black
		0.991188	0.116185	11.4237	0.487157
		1.00746	0.116293	12.7989	0.511953
		1.05845	0.118556	14.3263	0.537163
		1.05042	0.118736	16.0228	0.562793
		1.04195	0.119064	17.9071	0.58885
		1.03008	0.120253	20	0.615342
		1.04173	0.121832	20	0.615342
		1.07907	0.121887	IsoLine	IsoLine
		1.06831	0.123506
		1.08382	0.125471
		1.16945	0.128893
		1.22619	0.130794
		1.21332	0.13448
		1.37681	0.143793
		1.33651	0.146203
		1.38516	0.147605
		1.74415	0.175966
		1.69245	0.169613
		1.74917	0.173715
		1.89996	0.181795
		3.17187	0.246774
		3.93297	0.297803
		4.5611	0.314754
		4.80694	0.3046
		5.34181	0.327387
		6.54387	0.39073
		5.82798	0.347042
		6.78209	0.389679
		10.0524	0.449723
		9.69271	0.428782
		11.3577	0.486281
		11.059	0.463226
		12.6518	0.521774
		12.9532	0.533813
		11.9488	0.484183
		14.1483	0.56219
		13.4126	0.527097
		IsoLine	IsoLine
[truncated: 80 more columns]

## Sheet: PlotDat8
Source sheet	all data	0.414542	0.0566687	0.3	0.042188	0.343738	0.0476374	0.468568	0.0630913	0.504114	0.0670592	0.829913	0.0986994	0.821259	0.0996753	0.837056	0.102152	0.85701	0.10323	0.903144	0.109365	0.929631	0.111181	0.958597	0.111347	0.956911	0.112962	0.974301	0.113638	1.01837	0.118713	1.03261	0.118077	1.04977	0.11996	1.02419	0.118855	1.0441	0.12144	1.08593	0.122808	1.03431	0.123119	1.08417	0.123395	1.06121	0.12413	1.05426	0.124875
Plot name	Concordia5	0.447493	0.0599438	0.307722	0.0431638	0.411563	0.0557947	0.467326	0.0634638	0.50283	0.0672805	0.828377	0.0994191	0.819125	0.100141	0.835658	0.102708	0.855539	0.103883	0.900878	0.10973	0.928073	0.111762	0.957013	0.111937	0.954499	0.113187	0.972683	0.114256	1.01582	0.119048	1.03061	0.119215	1.04709	0.120458	1.02234	0.119802	1.04146	0.121839	1.08411	0.12345	1.03261	0.123626	1.0814	0.123871	1.05853	0.124481	1.05156	0.125373
Plot Type	1	0.723393	0.0883647	0.325608	0.0453982	0.482812	0.0640155	0.463778	0.0635394	0.499127	0.0671811	0.823977	0.0998373	0.812972	0.10013	0.831647	0.102967	0.851324	0.104238	0.894318	0.109578	0.923596	0.112015	0.952454	0.112204	0.947481	0.112864	0.96803	0.114545	1.00844	0.118818	1.02489	0.120022	1.03931	0.120382	1.01703	0.12041	1.03381	0.121657	1.07886	0.123728	1.02771	0.123765	1.07335	0.123752	1.05075	0.124234	1.04375	0.125273
1st free col	131	0.727148	0.0892106	0.343738	0.0476374	0.557657	0.0723004	0.458077	0.0633147	0.493167	0.0667654	0.816833	0.0999425	0.803067	0.0996406	0.825134	0.102923	0.84448	0.104285	0.883751	0.108915	0.916323	0.111933	0.945045	0.112141	0.936164	0.112007	0.960469	0.114498	0.99654	0.118034	1.01559	0.120476	1.02678	0.119735	1.0084	0.120664	1.02148	0.120901	1.07032	0.123635	1.01974	0.123532	1.06038	0.123045	1.03819	0.1234	1.03118	0.124578
Sigma Level	2	0.739907	0.0918501	0.362116	0.0498813	0.636279	0.0806498	0.450474	0.0627995	0.485211	0.0660516	0.807141	0.0997319	0.789845	0.0986958	0.816296	0.102577	0.835195	0.104023	0.86964	0.107769	0.906452	0.11152	0.934988	0.111751	0.921042	0.110654	0.950205	0.114115	0.980642	0.116728	1.00297	0.120565	1.01005	0.118546	0.996699	0.120555	1.00502	0.119606	1.05872	0.123172	1.00892	0.122934	1.04305	0.121778	1.02143	0.122015	1.01439	0.12332
Absolute Errs	FALSE	0.754965	0.0929539	0.380745	0.0521301	0.718871	0.0890642	0.441301	0.0620164	0.475606	0.0650708	0.795164	0.0992113	0.773882	0.0973364	0.805375	0.101938	0.823721	0.103459	0.8526	0.106192	0.894252	0.110787	0.922558	0.111043	0.902776	0.108863	0.93752	0.113407	0.961443	0.11496	0.987382	0.120287	0.989839	0.116866	0.982239	0.120087	0.985131	0.117827	1.04439	0.122353	0.99555	0.121987	1.02213	0.120009	1.00118	0.120141	0.994114	0.121554
Symbol Type	1	0.802642	0.0978842	0.399629	0.0543837	0.805631	0.097544	0.430958	0.0609995	0.464773	0.063866	0.781229	0.0983948	0.755877	0.0956219	0.792668	0.101024	0.810372	0.102609	0.833377	0.104251	0.880055	0.109752	0.908092	0.110038	0.882166	0.106714	0.922759	0.112394	0.93978	0.112805	0.969239	0.119648	0.967042	0.114769	0.965413	0.119273	0.962695	0.115642	1.02771	0.121199	0.979987	0.120717	0.998531	0.117814	0.978335	0.117857	0.971243	0.119357
Inverse Plot	FALSE	0.821073	0.0997645	0.418772	0.0566422	0.89677	0.10609	0.419897	0.0597934	0.453185	0.0624897	0.765717	0.0973047	0.736616	0.0936272	0.778521	0.0998599	0.795512	0.101495	0.812811	0.102033	0.86425	0.108445	0.891987	0.108762	0.86011	0.104299	0.906324	0.111102	0.916601	0.110358	0.94904	0.118666	0.942653	0.112347	0.946683	0.118135	0.938689	0.113147	1.00914	0.119743	0.962657	0.119158	0.973278	0.11529	0.95389	0.115266	0.946774	0.116824
Color Plot	FALSE	0.847967	0.10012	0.438176	0.0589054	0.99251	0.114702	0.408603	0.0584507	0.441348	0.0610022	0.74905	0.0959707	0.716942	0.0914395	0.763321	0.0984773	0.779545	0.100148	0.7918	0.0996326	0.847267	0.106902	0.874681	0.10725	0.837574	0.101725	0.888665	0.109568	0.892918	0.107726	0.927337	0.117368	0.917735	0.109705	0.926557	0.116704	0.914162	0.11045	0.989179	0.118024	0.944035	0.117353	0.947479	0.112546	0.928914	0.112479	0.921778	0.114067
3D plot	FALSE	0.849112	0.100649	0.457846	0.0611736	IsoLine	IsoLine	0.397568	0.0570302	0.429779	0.0594684	0.731684	0.0944293	0.697713	0.0891543	0.747483	0.0969139	0.762908	0.0986051	0.771263	0.0971561	0.829569	0.105163	0.856646	0.105544	0.815542	0.0991036	0.870262	0.107833	0.869767	0.105024	0.904721	0.11579	0.89338	0.10696	0.905587	0.115019	0.890188	0.10767	0.968379	0.116089	0.924627	0.115351	0.922261	0.109702	0.904499	0.109619	0.897346	0.111205
Linear	FALSE	0.861415	0.102202	0.477784	0.0634465			0.387275	0.0555938	0.418985	0.0579554	0.714091	0.0927224	0.679771	0.0868716	0.731438	0.0952124	0.746054	0.0969078	0.752098	0.0947115	0.81164	0.103278	0.838375	0.103689	0.794978	0.09655	0.851618	0.105944	0.84816	0.10237	0.88181	0.113974	0.870651	0.10423	0.884343	0.113126	0.867813	0.104928	0.947304	0.113991	0.904963	0.113208	0.898726	0.106883	0.881712	0.10681	0.874546	0.108365
Data Range	AC3:AG63	0.905084	0.106123	0.497996	0.0657244			0.378173	0.0542044	0.409437	0.0565293	0.696752	0.0908967	0.6639	0.0846912	0.715624	0.0934191	0.729444	0.0951027	0.735141	0.0924055	0.793968	0.101296	0.820365	0.101738	0.776779	0.0941755	0.833241	0.103953	0.82904	0.0998797	0.859228	0.11197	0.850541	0.101635	0.863404	0.111076	0.848015	0.102345	0.926531	0.111786	0.88558	0.11098	0.877902	0.104213	0.861548	0.104176	0.854374	0.10567
Filled Symbols	FALSE	0.893884	0.107082	0.518484	0.0680071			0.370661	0.0529227	0.401551	0.0552524	0.68014	0.0890019	0.650793	0.0827082	0.700472	0.0915831	0.713529	0.093239	0.721135	0.090339	0.777036	0.0992731	0.803108	0.099742	0.761741	0.0920839	0.815632	0.101915	0.813244	0.0976627	0.837591	0.109833	0.833929	0.0992896	0.843343	0.108926	0.831659	0.100032	0.906625	0.109536	0.867006	0.10873	0.860699	0.101807	0.844889	0.101831	0.837713	0.103237
ConcAge	FALSE	0.930587	0.107324	0.539252	0.0702947			0.365067	0.0518048	0.395674	0.0541805	0.664707	0.0870897	0.641023	0.0810095	0.686396	0.0897544	0.698745	0.0913675	0.710691	0.0886023	0.761304	0.0972633	0.787075	0.0977566	0.750523	0.0903666	0.799273	0.0998839	0.801462	0.0958154	0.81749	0.107621	0.821542	0.0972948	0.824707	0.106734	0.819461	0.0980907	0.88813	0.107301	0.849748	0.106518	0.84787	0.0997703	0.832464	0.0998784	0.825291	0.101174
ConcSwap	FALSE	0.89556	0.107392	0.560304	0.0725872			0.361635	0.0508994	0.392061	0.0533606	0.650875	0.0852123	0.635017	0.0796691	0.67378	0.0879828	0.685494	0.0895393	0.704265	0.0872712	0.747203	0.0953217	0.772702	0.0958356	0.743612	0.0890987	0.784608	0.0979163	0.794208	0.0944187	0.799473	0.105394	0.813921	0.0957384	0.808003	0.10456	0.811954	0.0966065	0.871549	0.105142	0.834277	0.104405	0.839975	0.098193	0.824815	0.0984029	0.817649	0.0995705
1st Symbol-row	1	0.926784	0.108542	0.581644	0.0748847			0.360515	0.0502461	0.390871	0.0528283	0.639022	0.0834209	0.633038	0.0787458	0.662967	0.0863167	0.674138	0.0878042	0.70214	0.0864039	0.735117	0.0935014	0.760383	0.0940315	0.741313	0.0883356	0.772039	0.0960656	0.791801	0.0935335	0.784031	0.103213	0.811399	0.0946884	0.793687	0.102463	0.809465	0.095644	0.857336	0.103119	0.821014	0.102448	0.83736	0.0971434	0.822276	0.0974691	0.815123	0.0984964
		0.958333	0.110102	0.603276	0.077187			0.361757	0.0498736	0.392156	0.0526071	0.62947	0.0817643	0.635172	0.0782798	0.654254	0.0848016	0.664987	0.0862096	0.704406	0.0860384	0.725376	0.0918518	0.750453	0.0923935	0.743725	0.0881107	0.761907	0.0943823	0.794344	0.0931986	0.771586	0.101138	0.814085	0.0941906	0.78215	0.100501	0.812104	0.0952451	0.845878	0.101286	0.810322	0.100701	0.840138	0.0966675	0.824958	0.097118	0.817822	0.0979987
		0.915247	0.110139	0.625203	0.0794943			0.365305	0.049798	0.395859	0.0527064	0.622479	0.0802878	0.641325	0.0782916	0.647876	0.0834787	0.658291	0.084799	0.710966	0.0861906	0.718245	0.0904181	0.743182	0.0909662	0.750743	0.0884337	0.75449	0.0929123	0.801727	0.0934285	0.762476	0.099225	0.821863	0.0942667	0.773707	0.0987266	0.819754	0.0954274	0.837487	0.0996937	0.802491	0.0992114	0.848188	0.0967861	0.832744	0.0973648	0.82563	0.0980991
		0.960767	0.110269	0.647431	0.0818065			0.371006	0.0500227	0.401819	0.0531221	0.618242	0.0790316	0.65123	0.0787806	0.644009	0.0823841	0.654231	0.0836108	0.721533	0.0868539	0.713919	0.0892394	0.73877	0.0897886	0.762061	0.0892905	0.749989	0.0916957	0.813628	0.0942133	0.756951	0.0975263	0.834393	0.0949136	0.768587	0.0971887	0.832082	0.0961829	0.832393	0.0983853	0.797737	0.0980199	0.861158	0.0974939	0.845295	0.0981988	0.838203	0.0987934
		0.941745	0.110799	0.669963	0.0841237			0.378609	0.0505379	0.409775	0.053836	0.616873	0.07803	0.664452	0.0797254	0.642758	0.0815478	0.652919	0.0826775	0.735644	0.0879993	0.712516	0.0883477	0.737337	0.0888928	0.777182	0.0906438	0.748528	0.0907656	0.829525	0.0955186	0.755161	0.0960882	0.851127	0.0961029	0.766931	0.095929	0.84855	0.0974785	0.830734	0.0973966	0.796187	0.097159	0.878481	0.0987601	0.86206	0.0995835	0.854994	0.100051
		0.934691	0.111686	0.692802	0.0864458			0.387783	0.051321	0.419379	0.0548167	0.618409	0.0773102	0.680415	0.0810848	0.644157	0.0809925	0.654391	0.0820245	0.752684	0.0895767	0.714074	0.0877675	0.738921	0.0883033	0.795448	0.0924344	0.750146	0.0901476	0.848725	0.0972874	0.757155	0.09495	0.871334	0.0977826	0.768784	0.094982	0.868436	0.0992577	0.832555	0.0967544	0.797886	0.0966522	0.899401	0.100529	0.882309	0.101458	0.875268	0.101817
		0.959104	0.11226	0.715954	0.0887729			0.398126	0.0523379	0.430212	0.0560216	0.622809	0.0768921	0.69842	0.0827993	0.648167	0.0807333	0.658606	0.0816696	0.771907	0.0915171	0.71855	0.0875145	0.74348	0.0880361	0.816059	0.0945839	0.754799	0.0898583	0.870387	0.0994424	0.762879	0.0941427	0.894131	0.0998793	0.774095	0.0943736	0.890872	0.101443	0.837807	0.0964762	0.802785	0.0965133	0.923003	0.102724	0.905155	0.103741	0.898139	0.104015
		0.995208	0.113766	0.739423	0.091105			0.409186	0.053544	0.441801	0.0573978	0.629953	0.0767868	0.717681	0.084794	0.65468	0.0807774	0.665449	0.0816225	0.792473	0.0937359	0.725824	0.0875957	0.750889	0.0880985	0.838114	0.0969985	0.762361	0.0899057	0.893567	0.101889	0.772176	0.0936884	0.91852	0.102301	0.782719	0.0941202	0.914878	0.103938	0.846347	0.0965698	0.810753	0.096746	0.948255	0.105249	0.9296	0.106333	0.922607	0.106548
		1.01706	0.113878	0.763213	0.0934421			0.420481	0.0548867	0.453638	0.0588854	0.639645	0.0769974	0.737355	0.0869817	0.663518	0.0811235	0.674735	0.0818845	0.813484	0.0961359	0.735695	0.0880088	0.760946	0.0884889	0.86065	0.0995726	0.772624	0.0902885	0.917249	0.104521	0.784793	0.0935994	0.943438	0.104943	0.794421	0.0942289	0.939405	0.106634	0.857942	0.0970325	0.82157	0.0973441	0.974055	0.107993	0.954576	0.10912	0.947604	0.109305
		0.991188	0.116185	0.787328	0.0957842			0.431516	0.0563072	0.465206	0.0604192	0.651622	0.077518	0.756583	0.0892668	0.67444	0.0817622	0.686208	0.0824485	0.834021	0.0986124	0.747895	0.0887425	0.773376	0.0891965	0.882682	0.102194	0.785309	0.0909963	0.9404	0.107223	0.800386	0.0938783	0.967793	0.107689	0.808882	0.0946966	0.963379	0.109414	0.872275	0.0978518	0.834943	0.0982911	0.999273	0.110836	0.978991	0.11198	0.972036	0.112166
		1.00746	0.116293	0.811773	0.0981313			0.441809	0.0577436	0.476001	0.0619322	0.665556	0.0783345	0.774525	0.0915495	0.687147	0.0826761	0.699557	0.083299	0.853187	0.101057	0.762092	0.089777	0.787841	0.090202	0.903247	0.104747	0.80007	0.0920098	0.962008	0.109877	0.818529	0.0945173	0.990522	0.110419	0.825707	0.0955106	0.985755	0.112156	0.888956	0.0990051	0.850507	0.0995614	1.02281	0.113655	1.00178	0.114789	0.994836	0.115007
		1.05845	0.118556	0.836552	0.100483			0.45091	0.059133	0.485549	0.0633583	0.681069	0.0794247	0.790397	0.09373	0.701293	0.0838403	0.714418	0.0844129	0.870143	0.103363	0.777897	0.0910838	0.803947	0.0914781	0.921445	0.107122	0.816505	0.0933012	0.981127	0.112367	0.838727	0.095499	1.01063	0.113013	0.844437	0.0966486	1.00555	0.11474	0.907529	0.100461	0.867836	0.10112	1.04363	0.116326	1.02194	0.117423	1.01501	0.117702
		1.05042	0.118736	0.861671	0.102841			0.458422	0.0604147	0.493434	0.0646352	0.697735	0.0807586	0.803504	0.0957129	0.716493	0.0852229	0.730385	0.0857597	0.884149	0.105429	0.79488	0.0926275	0.821253	0.0929899	0.936483	0.109214	0.834165	0.0948355	0.996923	0.114584	0.860431	0.0967967	1.02724	0.115359	0.864563	0.0980798	1.02191	0.117053	0.927488	0.10218	0.886458	0.102925	1.06083	0.118732	1.0386	0.119768	1.03167	0.120134
		1.04195	0.119064	0.887132	0.105203			0.464016	0.0615327	0.499312	0.065707	0.715102	0.0823001	0.813274	0.0974117	0.732331	0.0867862	0.747022	0.0873028	0.894593	0.107166	0.812577	0.0943658	0.839287	0.0946963	0.947702	0.110931	0.852567	0.0965706	1.00871	0.116432	0.883046	0.098375	1.03963	0.117354	0.885533	0.0997649	1.03411	0.118994	0.948288	0.104115	0.905866	0.104927	1.07366	0.120768	1.05103	0.121721	1.04409	0.122197
		1.03008	0.120253	0.912942	0.10757			0.467448	0.0624381	0.502924	0.066527	0.732695	0.0840069	0.81928	0.098752	0.748377	0.0884877	0.763875	0.0890001	0.901019	0.108497	0.830507	0.0962514	0.857559	0.0965505	0.954612	0.112199	0.871212	0.0984594	1.01596	0.117828	0.905957	0.100191	1.04725	0.11891	0.906777	0.101658	1.04161	0.120478	0.969362	0.106214	0.92553	0.10707	1.08156	0.122345	1.05868	0.123196	1.05173	0.123801
		1.04173	0.121832	0.939105	0.109942			0.468568	0.0630913	0.504114	0.0670592	0.750034	0.0858327	0.821259	0.0996753	0.764191	0.090281	0.780486	0.0908052	0.903144	0.109365	0.848179	0.0982328	0.875569	0.0985021	0.956911	0.112962	0.889589	0.10045	1.01837	0.118713	0.928539	0.102195	1.04977	0.11996	0.927716	0.103708	1.0441	0.12144	0.990135	0.108418	0.944913	0.109298	1.08417	0.123395	1.06121	0.12413	1.05426	0.124875
		1.07907	0.121887	0.965626	0.11232			Black	Black	Black	Black	0.766646	0.0877275	Black	Black	0.779342	0.092117	0.796401	0.0926689	Black	Black	0.865111	0.100256	0.892826	0.100498	Black	Black	0.907197	0.102489	Black	Black	0.950176	0.104332	Black	Black	0.947777	0.105858	Black	Black	1.01004	0.110669	0.963487	0.111548	Black	Black	Black	Black	Black	Black
		1.06831	0.123506	0.99251	0.114702							0.782079	0.0896396			0.793418	0.0939457	0.811185	0.0945404			0.880842	0.102266	0.908859	0.102483			0.923557	0.10452			0.970277	0.106544			0.966413	0.10805			1.02854	0.112904	0.980745	0.11376
		1.08382	0.125471	1	0.115359							0.79591	0.091517			0.806034	0.0957173	0.824436	0.0963686			0.894943	0.104207	0.923231	0.104404			0.938221	0.106487			0.988294	0.108771			0.983118	0.110224			1.04512	0.115062	0.996217	0.115873
		1.16945	0.128893	IsoLine	IsoLine							0.807764	0.0933084			0.816847	0.0973834	0.835791	0.0981036			0.907029	0.106028	0.935551	0.106208			0.950791	0.108338			1.00374	0.110951			0.997433	0.11232			1.05933	0.117086	1.00948	0.11783
		1.22619	0.130794									0.817316	0.094965			0.825561	0.0988986	0.844942	0.0996982			0.916771	0.107677	0.945481	0.107846			0.960922	0.110021			1.01618	0.113027			1.00897	0.114283			1.07079	0.118919	1.02017	0.119577
		1.21332	0.13448									0.824306	0.0964415			0.831938	0.100221	0.851639	0.101109			0.923902	0.109111	0.952751	0.109274			0.968339	0.111491			1.02529	0.11494			1.01741	0.116057			1.07918	0.120511	1.028	0.121067
		1.37681	0.143793									0.828544	0.0976977			0.835805	0.101316	0.855699	0.102297			0.928228	0.11029	0.957163	0.110451			0.97284	0.112708			1.03082	0.116639			1.02253	0.117595			1.08427	0.121819	1.03276	0.122258
		1.33651	0.146203									0.829913	0.0986994			0.837056	0.102152	0.85701	0.10323			0.929631	0.111181	0.958597	0.111347			0.974301	0.113638			1.03261	0.118077			1.02419	0.118855			1.08593	0.122808	1.03431	0.123119
		1.38516	0.147605									Black	Black			Black	Black	Black	Black			Black	Black	Black	Black			Black	Black			Black	Black			Black	Black			Black	Black	Black	Black
		1.74415	0.175966
		1.69245	0.169613
		1.74917	0.173715
		1.89996	0.181795
		3.17187	0.246774
		3.93297	0.297803
		4.5611	0.314754
		4.80694	0.3046
		5.34181	0.327387
		6.54387	0.39073
		5.82798	0.347042
		6.78209	0.389679
		10.0524	0.449723
		9.69271	0.428782
		11.3577	0.486281
		11.059	0.463226
		12.6518	0.521774
		12.9532	0.533813
		11.9488	0.484183
		14.1483	0.56219
		13.4126	0.527097
		IsoLine	IsoLine
[truncated: 80 more columns]

[truncated: 1 more sheets: data table]
