# Supplementary material for: A tectonic carpet of Variscan flysch at the base of a rootless accretionary prism in northwestern Iberia: U–Pb zircon age constrains from sediments and volcanic olistoliths
Source: Copernicus journal article supplement (doi:10.5194/se-12-835-2021), 2021-04-15
Supplement: Supplementary file 5 [file se-12-835-2021-supplement.zip › SUPP TABLES/Supplementary Table 7_MIR41.xls]

## Sheet: Combined data table
Spot ID	207Pb/ 235U	Internal ±2SE	External ±2SE	206Pb/ 238U	Internal ±2SE	External ±2SE	Error Correlation 6_38 vs 7_35	238U/ 206Pb	Internal ±2SE	External ±2SE	207Pb/ 206Pb	Internal ±2SE	External ±2SE	Error Correlation 38_6 vs 7_6	208Pb/ 232Th	Internal ±2SE	External ±2SE	206Pb/ 208Pb	Internal ±2SE	External ±2SE		Age 207Pb/ 235U Ma	Internal ±2SE Ma	External ±2SE Ma	Age 206Pb/ 238U Ma	Internal ±2SE Ma	External ±2SE Ma	Age 208Pb/ 232Th Ma	Internal ±2SE Ma	External ±2SE Ma	Age 207Pb/ 206Pb Ma	Internal ±2SE Ma	External ±2SE Ma	Age Discordance (%)
Detrital Zircons Sample MIR-41
MIR41-Row1-Spot1	0.765	0.03	0.054	0.0934	0.0019	0.0027	0.11026	10.7066	0.217801	0.309507	0.0586	0.0025	0.0034	0.24169	0.0286	0.00091	0.0043	4.15	0.11	1.5		576	17	31	576	11	16	570	18	84	555	85	120	3.78378
MIR41-Row1-Spot2	0.776	0.031	0.055	0.0967	0.0013	0.0024	0.028519	10.3413	0.139024	0.25666	0.0569	0.0026	0.0034	0.30166	0.02967	0.0009	0.0044	3.13	0.12	1.1		582	17	31	594.8	7.4	14	591	18	87	485	95	130	22.6392
MIR41-Row1-Spot3	0.636	0.041	0.055	0.061	0.0061	0.0062	0.85971	16.3934	1.63934	1.66622	0.0759	0.0036	0.0047	0.66419	0.014	0.0019	0.0028	4.84	0.23	1.6		498	26	35	381	37	38	280	39	56	1091	97	120	-65.0779
MIR41-Row1-Spot4	0.777	0.014	0.048	0.0875	0.0015	0.0024	0.055781	11.4286	0.195918	0.313469	0.0645	0.0018	0.0031	0.71957	0.02941	0.00043	0.0043	4.179	0.09	1.5		583.6	8	27	540.9	9	14	585.8	8.5	85	748	60	100	-27.6872
MIR41-Row1-Spot5	0.913	0.017	0.056	0.1062	0.0014	0.0026	0.78579	9.4162	0.124131	0.230528	0.06134	0.00075	0.0025	0.023155	0.03174	0.00059	0.0047	4.015	0.061	1.6		658.6	9	30	650.5	8.4	15	631	11	91	650	27	88	0.0769231
MIR41-Row1-Spot6	0.797	0.012	0.048	0.09761	0.00076	0.0022	0.17101	10.2448	0.0797673	0.230905	0.05938	0.00096	0.0025	0.35629	0.02987	0.00046	0.0044	6.07	0.12	2.1		594.9	7	27	600.4	4.4	13	594.9	9	86	578	35	92	3.87543
MIR41-Row1-Spot7	13.19	0.17	0.79	0.4742	0.0044	0.011	0.78349	2.10881	0.0195672	0.0489181	0.1994	0.0017	0.0079	-0.19485	0.1365	0.0024	0.02	9.6	1.4	3.5		2693	12	57	2502	19	47	2586	43	350	2821	14	65	-11.308
MIR41-Row1-Spot8	0.627	0.018	0.041	0.08	0.001	0.002	0.30363	12.5	0.15625	0.3125	0.0562	0.0015	0.0027	0.20162	0.02457	0.00057	0.0037	10.6	0.23	3.6		494	11	26	495.9	6.2	12	491	11	72	465	58	100	6.64516
MIR41-Row1-Spot9	6.346	0.053	0.38	0.351	0.0028	0.0078	0.71184	2.849	0.0227271	0.0633112	0.13063	0.00084	0.0051	0.40022	0.0938	0.0022	0.014	7.439	0.08	2.7		2026.1	7.6	54	1939	13	37	1811	41	260	2106	11	69	-7.92972
MIR41-Row1-Spot10	0.783	0.019	0.05	0.0973	0.0013	0.0024	0.16064	10.2775	0.137315	0.253504	0.0587	0.0014	0.0027	0.34092	0.02893	0.00075	0.0043	8.04	0.19	2.7		587	11	28	598.2	7.8	14	576	15	84	551	51	99	8.56624
MIR41-Row1-Spot11	0.835	0.018	0.052	0.1018	0.0014	0.0025	0.44151	9.82318	0.135093	0.241237	0.0595	0.0011	0.0026	0.20517	0.03181	0.00048	0.0048	4.254	0.063	1.5		616.2	9.9	29	625	7.9	15	632.8	9.4	95	590	43	98	5.9322
MIR41-Row1-Spot12	4.581	0.062	0.28	0.3101	0.0025	0.0069	0.01	3.22477	0.0259978	0.0717539	0.1074	0.0018	0.0046	0.57457	0.0909	0.0015	0.013	5.19	0.12	1.8		1750	11	50	1741	12	34	1759	28	240	1753	31	78	-0.684541
MIR41-Row1-Spot13	7.28	0.1	0.44	0.3872	0.0053	0.0096	0.80679	2.58264	0.0353513	0.0640325	0.1362	0.0013	0.0054	0.27077	0.1087	0.0019	0.017	6.88	0.13	2.3		2146	13	54	2109	24	45	2085	34	310	2179	16	70	-3.21248
MIR41-Row1-Spot14	0.794	0.02	0.051	0.0987	0.0011	0.0023	0.01	10.1317	0.112917	0.236099	0.0591	0.0016	0.0028	0.4067	0.03077	0.00068	0.0046	4.72	0.13	1.6		595	10	27	606.9	6.4	14	612	13	90	565	57	100	7.41593
MIR41-Row1-Spot15	6.603	0.091	0.4	0.3785	0.0051	0.0094	0.83722	2.64201	0.0355991	0.0656139	0.12652	0.00088	0.005	0.22701	0.1076	0.0016	0.015	4.96	0.14	1.6		2059	12	53	2069	24	44	2065	29	280	2050	12	70	0.926829
MIR41-Row1-Spot16	0.728	0.025	0.049	0.0897	0.0024	0.0031	0.75479	11.1483	0.298281	0.38528	0.0596	0.0013	0.0027	-0.051221	0.0251	0.0011	0.0038	7.24	0.2	2.5		555	15	29	554	14	18	501	23	75	582	49	97	-4.811
MIR41-Row1-Spot17	6.34	0.11	0.39	0.3709	0.0069	0.01	0.88956	2.69615	0.0501575	0.072692	0.12523	0.00092	0.005	0.35481	0.1026	0.0021	0.015	13.91	0.18	4.7		2023	16	54	2033	32	49	1974	39	270	2032	13	70	0.0492126
MIR41-Row1-Spot18	0.832	0.015	0.051	0.0942	0.0015	0.0024	0.56856	10.6157	0.16904	0.270464	0.0641	0.001	0.0027	0.43757	0.0228	0.0016	0.0037	5.985	0.085	2.1		614.3	8.5	28	580	8.6	14	455	31	74	742	34	89	-21.8329
MIR41-Row1-Spot19	0.713	0.016	0.045	0.0893	0.0012	0.0022	0.31919	11.1982	0.15048	0.27588	0.0582	0.0013	0.0026	0.35314	0.02833	0.00076	0.0042	8.01	0.18	2.7		546.2	9.7	27	551.6	7.2	13	565	15	82	543	50	100	1.58379
MIR41-Row1-Spot20	4.45	0.042	0.26	0.3048	0.0029	0.007	0.78076	3.28084	0.0312153	0.0753474	0.10633	0.00073	0.0042	0.23387	0.0802	0.0011	0.013	9.404	0.083	3		1721.6	7.7	49	1715	14	34	1560	20	240	1737	13	73	-1.26655
MIR41-Row1-Spot21	4.906	0.082	0.3	0.3323	0.0045	0.0083	0.90349	3.00933	0.0407523	0.0751653	0.10788	0.00084	0.0043	0.12664	0.0953	0.0018	0.014	4.068	0.035	1.4		1802	14	52	1849	22	40	1841	33	250	1763	14	73	4.87805
MIR41-Row1-Spot22	6.25	0.19	0.42	0.366	0.01	0.013	0.93455	2.73224	0.0746514	0.0970468	0.1245	0.0011	0.005	-0.24706	0.1018	0.003	0.015	3.328	0.046	1.1		2009	27	59	2008	47	59	1959	56	270	2021	16	70	-0.643246
MIR41-Row1-Spot23	4.178	0.084	0.26	0.2679	0.0056	0.0079	0.95287	3.73274	0.0780266	0.110073	0.11469	0.0008	0.0045	0.40044	0.0581	0.0048	0.0099	10.61	0.12	3.6		1669	17	51	1529	29	40	1140	92	190	1875	13	72	-18.4533
MIR41-Row1-Spot24	3.81	0.2	0.3	0.2593	0.0095	0.011	0.94364	3.85654	0.141292	0.163602	0.1069	0.0023	0.0048	-0.60367	0.0833	0.002	0.013	6.99	0.11	2.4		1588	42	63	1485	48	56	1617	38	240	1759	36	74	-15.577
MIR41-Row1-Spot25	0.888	0.019	0.055	0.1054	0.0015	0.0026	0.4044	9.48767	0.135024	0.234041	0.0615	0.0013	0.0027	0.25606	0.03089	0.00056	0.0045	7.99	0.14	2.7		645	10	30	645.7	8.6	15	615	11	89	650	45	95	-0.661538
MIR41-Row1-Spot26	0.746	0.016	0.047	0.0899	0.0012	0.0022	0.43959	11.1235	0.148478	0.272209	0.0601	0.0012	0.0026	0.26213	0.0271	0.0014	0.0042	42.8	2.3	15		565.4	9.4	27	555.1	7.1	13	540	27	82	603	45	96	-7.94362
MIR41-Row1-Spot27	10.6	0.16	0.64	0.4561	0.0073	0.012	0.89424	2.1925	0.0350916	0.0576848	0.1688	0.0012	0.0067	0.40527	0.1193	0.0021	0.017	9.061	0.08	3.1		2488	14	56	2421	32	53	2277	37	300	2545	12	66	-4.8723
MIR41-Row1-Spot28	0.779	0.02	0.05	0.0939	0.0011	0.0023	0.36159	10.6496	0.124756	0.260854	0.0606	0.0015	0.0028	0.12859	0.02727	0.00063	0.0039	4.679	0.085	1.6		585	12	29	578.7	6.7	13	544	12	78	632	49	93	-8.43354
MIR41-Row1-Spot29	0.621	0.017	0.04	0.0795	0.0011	0.002	0.00053363	12.5786	0.174044	0.316443	0.0563	0.0018	0.0028	0.4708	0.02304	0.00079	0.0035	12.2	1.2	4.3		490	11	25	492.9	6.5	12	460	16	69	451	70	110	9.29047
MIR41-Row1-Spot30	0.641	0.012	0.04	0.0828	0.0011	0.0021	0.69414	12.0773	0.160447	0.306308	0.05678	0.00076	0.0023	0.031721	0.02453	0.00055	0.0036	9.84	0.15	3.4		502.9	7.5	25	512.6	6.7	12	490	11	70	481	30	92	6.56965
MIR41-Row1-Spot31	3.28	0.14	0.24	0.1933	0.0071	0.0082	0.85794	5.17331	0.190018	0.219457	0.1213	0.002	0.0051	0.085434	0.0313	0.0026	0.0053	5.11	0.25	1.9		1471	32	56	1138	38	44	622	50	100	1974	30	75	-42.3506
MIR41-Row1-Spot32	1.13	0.18	0.19	0.112	0.003	0.0038	0.91119	8.92857	0.239158	0.302934	0.0728	0.0095	0.0099	-0.84985	0.0407	0.007	0.0092	4.51	0.53	1.7		751	67	71	684	17	22	760	100	130	910	180	190	-24.8352
MIR41-Row1-Spot33	5.938	0.075	0.36	0.3505	0.005	0.0089	0.71091	2.85307	0.0407	0.0724459	0.1219	0.0012	0.0049	0.50884	0.0993	0.0021	0.014	3.628	0.048	1.3		1966	11	52	1937	24	42	1913	38	260	1983	18	72	-2.31972
MIR41-Row1-Spot34	1.666	0.025	0.1	0.1673	0.0023	0.0042	0.79823	5.97729	0.0821743	0.150057	0.07155	0.00058	0.0028	0.25156	0.04894	0.00059	0.0069	3.883	0.065	1.5		995.3	9.6	39	997	13	23	966	11	130	973	17	81	2.4666
MIR41-Row1-Spot35	0.862	0.02	0.055	0.1039	0.002	0.003	0.43219	9.62464	0.185267	0.277901	0.06	0.0014	0.0027	0.3197	0.0309	0.00061	0.0041	4.89	0.15	1.5		631	11	30	637	12	17	615	12	81	597	49	96	6.70017
MIR41-Row1-Spot36	0.825	0.022	0.053	0.0933	0.0037	0.0042	0.78442	10.7181	0.425048	0.482487	0.064	0.0014	0.0029	0.71482	0.0243	0.0026	0.0044	1.331	0.014	0.47		611	12	29	575	22	25	485	51	87	737	48	97	-21.981
MIR41-Row1-Spot37	0.763	0.012	0.046	0.0935	0.0013	0.0024	0.50058	10.6952	0.148703	0.274529	0.05737	0.00088	0.0024	0.37263	0.0298	0.001	0.0045	12.16	0.42	4.1		575.4	7	27	576.4	7.9	14	593	20	88	517	30	82	11.4894
MIR41-Row1-Spot38	1.01	0.2	0.21	0.0968	0.003	0.0036	0.96297	10.3306	0.320163	0.384195	0.072	0.011	0.012	-0.91046	0.0425	0.0096	0.011	2.95	0.41	1.1		680	83	86	595	17	21	840	180	220	820	240	240	-27.439
MIR41-Row1-Spot39	0.731	0.013	0.045	0.0898	0.0011	0.0022	0.63341	11.1359	0.136408	0.272816	0.05808	0.00071	0.0024	0.079602	0.0274	0.00046	0.0041	3.466	0.044	1.2		560.1	8.3	29	554.2	6.5	13	546.4	9	80	531	27	89	4.36911
MIR41-Row1-Spot40	1.441	0.027	0.089	0.1195	0.0012	0.0028	0.22702	8.3682	0.0840321	0.196075	0.0853	0.0019	0.0038	0.33068	0.04682	0.00084	0.0069	2.357	0.049	0.71		906	11	37	727.4	7.2	16	925	16	130	1326	42	84	-45.1433
MIR41-Row2-Spot41	0.803	0.017	0.045	0.0866	0.0038	0.0038	0.58392	11.5473	0.506696	0.506696	0.0671	0.0024	0.0029	0.83928	0.01721	0.00095	0.0011	9.45	0.74	1.8		597.9	9.9	26	535	23	23	345	19	22	843	78	95	-36.5362
MIR41-Row2-Spot42	0.773	0.021	0.046	0.0961	0.0016	0.0016	0.35836	10.4058	0.17325	0.17325	0.0594	0.0015	0.0021	0.2819	0.03053	0.00065	0.0011	4.017	0.092	0.73		581	12	26	591.2	9.3	9.3	608	13	22	573	55	76	3.17627
MIR41-Row2-Spot43	0.857	0.015	0.047	0.1027	0.0015	0.0015	0.61269	9.7371	0.142217	0.142217	0.06011	0.0008	0.0017	0.18385	0.03268	0.00069	0.0012	7.01	0.19	1.3		628.3	7.9	26	630.3	9	9	650	14	24	606	29	60	4.0099
MIR41-Row2-Spot44	7.15	0.1	0.39	0.3732	0.0076	0.0076	0.01	2.67953	0.054567	0.054567	0.1375	0.0025	0.0042	0.89006	0.092	0.013	0.013	6.5	0.7	1.4		2129	13	48	2044	36	36	1770	240	250	2194	29	49	-6.83683
MIR41-Row2-Spot45	0.894	0.024	0.053	0.1031	0.002	0.002	0.24771	9.69932	0.188154	0.188154	0.0623	0.0016	0.0022	0.46812	0.03279	0.00077	0.0013	4.078	0.099	0.74		648	13	28	632	12	12	652	15	25	690	58	80	-8.4058
MIR41-Row2-Spot46	13.76	0.22	0.75	0.5331	0.0075	0.0075	0.78663	1.87582	0.0263903	0.0263903	0.1887	0.0018	0.0049	0.13769	0.1488	0.0025	0.0052	4.944	0.07	0.89		2735	16	53	2754	32	32	2804	44	91	2730	16	43	0.879121
MIR41-Row2-Spot47	7.3	0.16	0.42	0.4035	0.0059	0.0059	0.7562	2.47831	0.0362381	0.0362381	0.1317	0.0018	0.0037	-0.12978	0.1147	0.0034	0.0049	10.53	0.45	1.9		2148	20	51	2185	27	27	2194	62	89	2120	25	49	3.06604
MIR41-Row2-Spot48	3.368	0.05	0.18	0.2622	0.0035	0.0035	0.80443	3.81388	0.05091	0.05091	0.09357	0.00081	0.0024	0.17528	0.0789	0.0015	0.0028	6.44	0.11	1.1		1499	11	41	1501	18	18	1535	28	53	1499	16	49	0.133422
MIR41-Row2-Spot49	1.753	0.05	0.1	0.1732	0.0031	0.0031	0.75855	5.77367	0.103339	0.103339	0.0744	0.0012	0.0022	-0.1741	0.0528	0.0011	0.002	2.666	0.036	0.48		1027	18	39	1030	17	17	1039	21	38	1049	34	60	-1.81125
MIR41-Row2-Spot50	0.858	0.036	0.058	0.0996	0.0023	0.0023	0.56545	10.0402	0.231851	0.231851	0.0631	0.0021	0.0026	-0.042413	0.0318	0.0015	0.0018	3.92	0.15	0.72		627	20	32	612	14	14	632	29	35	699	71	89	-12.4464
MIR41-Row2-Spot51	4.56	0.1	0.26	0.3085	0.0069	0.0069	0.52026	3.24149	0.0725001	0.0725001	0.1077	0.0023	0.0035	0.47132	0.0906	0.0022	0.0035	2.374	0.04	0.42		1745	19	49	1733	34	34	1752	40	65	1772	39	59	-2.2009
MIR41-Row2-Spot52	2.767	0.078	0.16	0.2126	0.0032	0.0032	0.32068	4.70367	0.0707984	0.0707984	0.0949	0.0027	0.0036	0.1658	0.0679	0.0016	0.0026	3.267	0.065	0.59		1345	21	45	1246	18	18	1328	30	49	1530	51	67	-18.5621
MIR41-Row2-Spot53	5.24	0.085	0.29	0.3401	0.0039	0.0039	0.63613	2.94031	0.0337172	0.0337172	0.1126	0.0015	0.0031	0.15529	0.0966	0.0017	0.0034	2.351	0.048	0.41		1858	14	47	1887	19	19	1864	31	63	1841	25	51	2.49864
MIR41-Row2-Spot54	6.01	0.056	0.32	0.3561	0.0037	0.0037	0.64548	2.8082	0.0291782	0.0291781	0.1224	0.0011	0.0032	0.53178	0.10006	0.00099	0.0032	4.227	0.062	0.76		1977	8.1	46	1963	18	18	1927	18	59	1992	15	46	-1.45582
MIR41-Row2-Spot55	12.95	0.12	0.69	0.4904	0.0047	0.0047	0.77259	2.03915	0.0195433	0.0195433	0.1932	0.0014	0.0049	0.39306	0.1384	0.0019	0.0047	11.67	0.18	2.1		2675.8	8.5	50	2572	20	20	2620	34	83	2769	12	42	-7.11448
MIR41-Row2-Spot56	0.823	0.013	0.045	0.1012	0.0015	0.0015	0.4077	9.88142	0.146464	0.146464	0.0597	0.0011	0.0018	0.43274	0.03136	0.00061	0.0011	5.903	0.094	1.1		611.6	7.8	28	621.3	9	9	624	12	22	590	39	66	5.30508
MIR41-Row2-Spot57	0.923	0.016	0.051	0.1088	0.0013	0.0013	0.38859	9.19118	0.109821	0.109821	0.0612	0.0011	0.0019	0.34394	0.03451	0.00067	0.0013	9.69	0.19	1.7		663.4	8.5	27	666	7.4	7.4	686	13	24	652	36	60	2.14724
MIR41-Row2-Spot58	0.748	0.016	0.042	0.0929	0.0012	0.0012	0.5913	10.7643	0.139043	0.139043	0.05863	0.00097	0.0017	0.072747	0.02864	0.00053	0.001	7.58	0.15	1.4		569.9	9.1	24	572.7	7.3	7.3	571	11	20	550	36	64	4.12727
MIR41-Row2-Spot59	4.49	0.11	0.26	0.2893	0.0063	0.0063	0.50205	3.45662	0.0752738	0.0752738	0.1137	0.0024	0.0037	0.3486	0.093	0.0025	0.0038	4.68	0.1	0.84		1732	20	46	1638	31	31	1798	46	70	1863	41	62	-12.0773
MIR41-Row2-Spot60	4.449	0.095	0.25	0.3059	0.0048	0.0048	0.70816	3.26904	0.0512959	0.0512959	0.1054	0.0014	0.0029	-0.038618	0.0888	0.0014	0.0031	3.33	0.12	0.61		1724	19	50	1720	24	24	1719	26	57	1721	25	52	-0.0581058
MIR41-Row2-Spot61	0.781	0.029	0.05	0.0937	0.0012	0.0012	0.14167	10.6724	0.136679	0.136679	0.0603	0.0016	0.0022	0.22369	0.02901	0.00069	0.0011	2.367	0.059	0.43		585	17	29	577.1	7	7	578	13	22	635	70	95	-9.11811
MIR41-Row2-Spot62	1	0.029	0.06	0.1118	0.0023	0.0023	0.35695	8.94454	0.184011	0.184011	0.065	0.0016	0.0022	0.29656	0.032	0.001	0.0014	10.27	0.36	1.9		703	15	30	683	14	14	636	20	28	770	50	71	-11.2987
MIR41-Row2-Spot63	0.886	0.018	0.05	0.107	0.0016	0.0016	0.2913	9.34579	0.13975	0.13975	0.06	0.0012	0.0019	0.37098	0.03325	0.00075	0.0013	5.24	0.12	0.95		643.8	9.7	27	655.1	9.1	9.1	661	15	25	610	39	61	7.39344
MIR41-Row2-Spot64	5.89	0.13	0.34	0.3476	0.0038	0.0038	0.60587	2.87687	0.0314502	0.0314502	0.1233	0.0023	0.0038	-0.019302	0.0997	0.0015	0.0034	2.742	0.041	0.49		1962	20	52	1923	18	18	1922	28	63	2002	33	55	-3.94605
MIR41-Row2-Spot65	2.29	0.13	0.18	0.1863	0.0072	0.0072	0.98078	5.36769	0.207447	0.207447	0.0895	0.0018	0.0028	-0.83793	0.0522	0.0021	0.0027	16.6	1.5	3.3		1211	41	55	1100	39	39	1028	41	51	1411	38	59	-22.0411
MIR41-Row2-Spot66	0.896	0.017	0.05	0.1056	0.0016	0.0016	0.41165	9.4697	0.14348	0.14348	0.0613	0.0012	0.0019	0.33809	0.03207	0.00064	0.0012	6.09	0.2	1.1		651	9.4	28	646.8	9.1	9.1	638	13	23	646	41	66	0.123839
MIR41-Row2-Spot67	6.758	0.091	0.37	0.3885	0.0038	0.0038	0.72634	2.574	0.0251769	0.0251769	0.1271	0.0011	0.0033	0.28797	0.1087	0.0018	0.0038	7.37	0.2	1.3		2080	12	48	2116	18	18	2085	33	69	2058	16	46	2.81827
MIR41-Row2-Spot68	0.767	0.021	0.045	0.0918	0.0015	0.0015	0.17974	10.8933	0.177994	0.177994	0.0598	0.0017	0.0023	0.34372	0.02895	0.00059	0.0011	10.98	0.26	2		577	12	26	566.3	9	9	577	12	21	614	69	90	-7.76873
MIR41-Row2-Spot69	4.705	0.053	0.25	0.2942	0.003	0.003	0.73145	3.39905	0.0346606	0.0346606	0.1158	0.001	0.003	0.30615	0.0847	0.0011	0.0028	9.92	0.12	1.8		1767.7	9.4	45	1663	15	15	1643	21	53	1892	16	46	-12.1036
MIR41-Row2-Spot70	0.761	0.017	0.043	0.093	0.0014	0.0014	0.3822	10.7527	0.161868	0.161868	0.0594	0.0012	0.0019	0.25765	0.02857	0.00085	0.0012	11.18	0.27	2		574	9.6	25	573	8.4	8.4	569	17	24	575	45	69	-0.347826
MIR41-Row2-Spot71	0.839	0.083	0.094	0.1034	0.0026	0.0026	0.18147	9.67118	0.243182	0.243182	0.0594	0.0057	0.0059	-0.053412	0.0322	0.0019	0.0022	4.13	0.21	0.77		611	46	52	634	15	15	640	38	42	520	200	210	21.9231
MIR41-Row2-Spot72	0.833	0.017	0.047	0.1014	0.0014	0.0014	0.72198	9.86193	0.136161	0.136161	0.06035	0.0006	0.0016	-0.0016245	0.03066	0.00059	0.0011	5.011	0.06	0.9		615.1	9.4	26	622.5	8	8	610	12	22	615	22	57	1.21951
MIR41-Row2-Spot73	0.892	0.019	0.05	0.1059	0.0017	0.0017	0.55472	9.44287	0.151585	0.151585	0.0611	0.0012	0.0019	0.18191	0.03262	0.00067	0.0012	12.58	0.25	2.3		649	11	28	649.1	9.9	9.9	649	13	24	640	43	67	1.42188
MIR41-Row2-Spot74	5.46	0.11	0.31	0.3465	0.0053	0.0053	0.46717	2.886	0.0441438	0.0441438	0.1149	0.0023	0.0036	0.31564	0.0991	0.0033	0.0045	6.14	0.16	1.1		1896	18	50	1917	25	25	1910	60	82	1882	33	53	1.85972
MIR41-Row2-Spot75	0.776	0.016	0.044	0.097	0.0013	0.0013	0.54231	10.3093	0.138166	0.138166	0.0582	0.001	0.0017	0.12227	0.02974	0.00084	0.0012	6.66	0.13	1.2		582.6	9.3	25	596.8	7.5	7.5	592	16	24	541	36	62	10.3142
MIR41-Row2-Spot76	1.785	0.046	0.1	0.177	0.0025	0.0025	0.58291	5.64972	0.0797983	0.0797983	0.0727	0.0015	0.0023	0.020571	0.0535	0.0017	0.0024	5.42	0.16	0.98		1039	17	38	1050	14	14	1052	33	46	1003	40	63	4.68594
MIR41-Row2-Spot77	3.05	0.11	0.19	0.1615	0.0018	0.0018	0.29598	6.19195	0.0690124	0.0690125	0.1364	0.0046	0.0057	0.046986	0.0773	0.0017	0.0029	2.817	0.054	0.5		1416	28	49	965	10	10	1505	31	54	2172	59	73	-55.5709
MIR41-Row2-Spot78	7.78	0.11	0.42	0.4173	0.0057	0.0057	0.81393	2.39636	0.0327324	0.0327324	0.1369	0.0014	0.0036	0.13803	0.121	0.0023	0.0043	8.02	0.15	1.4		2208	14	52	2248	26	26	2308	41	78	2187	18	46	2.78921
MIR41-Row2-Spot79	5.12	0.17	0.32	0.3051	0.0093	0.0093	0.95348	3.27761	0.0999076	0.0999076	0.1211	0.001	0.0031	-0.1768	0.0891	0.0028	0.0039	16.5	1.4	3.3		1837	28	52	1715	46	46	1724	52	73	1976	14	43	-13.2085
MIR41-Row3-Spot80	0.787	0.018	0.033	0.0955	0.0014	0.0015	0.10982	10.4712	0.153505	0.164469	0.0597	0.0016	0.0032	0.47823	0.02866	0.00046	0.0012	1.388	0.037	0.41		589	10	19	588	8.2	8.6	571.2	9.1	23	583	58	110	0.857633
MIR41-Row3-Spot81	2.63	0.58	0.59	0.1237	0.0055	0.0056	0.84064	8.08407	0.359437	0.365973	0.146	0.027	0.028	-0.72486	0.0603	0.006	0.0064	1.272	0.069	0.39		1250	160	160	751	32	32	1200	120	130	2080	330	340	-63.8942
MIR41-Row3-Spot82	1.555	0.032	0.062	0.1519	0.0015	0.0017	0.54202	6.58328	0.0650093	0.0736772	0.0737	0.0013	0.0036	-0.28455	0.045	0.0011	0.002	5.58	0.36	1.7		952	13	25	911.4	8.3	9.3	889	20	39	1032	35	99	-11.686
MIR41-Row3-Spot83	6.657	0.08	0.24	0.3722	0.004	0.0044	0.71806	2.68673	0.028874	0.0317614	0.1285	0.001	0.006	0.076228	0.1023	0.0018	0.0043	11.3	1.8	3.9		2066	11	32	2040	19	21	1968	33	78	2077	14	82	-1.78142
MIR41-Row3-Spot84	0.827	0.019	0.034	0.097	0.0014	0.0015	0.52713	10.3093	0.148794	0.159422	0.06211	0.00097	0.003	0.12131	0.03011	0.00085	0.0014	10.29	0.26	3.1		612	10	19	596.9	8.4	8.8	600	17	28	675	34	100	-11.5704
MIR41-Row3-Spot85	0.608	0.017	0.027	0.07708	0.00092	0.001	0.17704	12.9735	0.154848	0.168313	0.0565	0.0015	0.003	0.2753	0.02337	0.00062	0.0011	8.98	0.23	2.7		482	11	17	478.7	5.5	6	467	12	21	466	59	120	2.72532
MIR41-Row3-Spot86	7.64	0.12	0.29	0.3983	0.0057	0.006	0.74101	2.51067	0.0359297	0.0378208	0.1371	0.0017	0.0065	0.1523	0.1092	0.0024	0.0048	8.42	0.11	2.5		2189	14	34	2161	26	28	2095	43	87	2194	20	79	-1.5041
MIR41-Row3-Spot87	0.855	0.018	0.035	0.09778	0.00087	0.00099	0.7058	10.227	0.0909953	0.103546	0.06268	0.00097	0.003	-0.32177	0.03136	0.00088	0.0015	11.3	0.24	3.3		626.9	9.9	19	601.3	5.1	5.8	624	17	29	701	35	110	-14.2225
MIR41-Row3-Spot88	0.959	0.046	0.056	0.1095	0.0024	0.0024	0.037365	9.13242	0.200163	0.200163	0.0621	0.0032	0.0043	0.35556	0.0321	0.0024	0.0027	13.6	1.1	4.2		681	24	29	670	14	14	638	48	53	670	120	160	0
MIR41-Row3-Spot89	0.819	0.045	0.053	0.1017	0.0022	0.0023	0.14427	9.83284	0.212707	0.222375	0.0591	0.0037	0.0046	0.2939	0.02977	0.00086	0.0014	4.87	0.18	1.5		605	25	29	624	13	13	593	17	28	530	130	160	17.7358
MIR41-Row3-Spot90	5.276	0.085	0.2	0.3274	0.0039	0.0042	0.77766	3.05437	0.0363837	0.0391825	0.116	0.0014	0.0055	-0.17889	0.0996	0.0022	0.0044	6.227	0.079	1.9		1864	14	33	1826	19	20	1918	40	81	1894	22	86	-3.59029
MIR41-Row3-Spot91	0.781	0.018	0.032	0.0945	0.0015	0.0015	0.41289	10.582	0.167968	0.167968	0.0598	0.0013	0.0031	0.29655	0.03006	0.00067	0.0013	4.968	0.097	1.5		586	10	18	582.1	8.6	9.1	599	13	26	600	50	110	-2.98333
MIR41-Row3-Spot92	6.024	0.053	0.21	0.3476	0.0029	0.0033	0.65133	2.87687	0.0240015	0.0273121	0.12603	0.0009	0.0058	0.557	0.1	0.0017	0.0042	5.49	0.074	1.6		1979.1	7.6	31	1923	14	16	1927	32	77	2043	13	82	-5.87372
MIR41-Row3-Spot93	0.625	0.013	0.025	0.0807	0.0013	0.0013	0.15408	12.3916	0.199616	0.199616	0.0566	0.0015	0.003	0.55539	0.02543	0.00083	0.0013	14.92	0.62	4.5		492.6	7.8	16	500.1	7.5	7.9	508	16	25	467	59	120	7.08779
MIR41-Row3-Spot94	4.73	0.17	0.23	0.2689	0.0077	0.0078	0.96577	3.71886	0.10649	0.107873	0.128	0.0011	0.006	-0.33472	0.0636	0.0014	0.0028	13.36	0.62	4.1		1769	30	42	1534	39	40	1247	27	54	2070	15	82	-25.8937
MIR41-Row3-Spot95	0.822	0.023	0.036	0.0996	0.0017	0.0018	0.59398	10.0402	0.171368	0.181449	0.0599	0.0013	0.003	0.097796	0.0332	0.0012	0.0018	14.56	0.57	4.4		611	13	21	612	10	11	659	24	35	594	46	110	3.0303
MIR41-Row3-Spot96	0.82	0.012	0.03	0.098	0.0012	0.0013	0.40673	10.2041	0.124948	0.13536	0.06168	0.00088	0.003	0.49117	0.03124	0.00044	0.0013	6.64	0.13	2		607.8	6.4	17	602.4	7.3	7.8	621.7	8.5	25	661	31	100	-8.86536
MIR41-Row3-Spot97	0.888	0.023	0.038	0.1068	0.0019	0.0019	0.61598	9.3633	0.166575	0.166575	0.0604	0.0012	0.003	0.081342	0.03382	0.00081	0.0015	4.945	0.085	1.5		645	13	21	654	11	11	672	16	29	615	45	110	6.34146
MIR41-Row3-Spot98	0.825	0.024	0.037	0.0984	0.0019	0.002	0.53171	10.1626	0.196229	0.206557	0.0608	0.0013	0.0031	0.11831	0.03254	0.00072	0.0014	6.12	0.13	1.8		610	13	21	605	11	12	647	14	28	638	50	120	-5.17241
MIR41-Row3-Spot99	0.885	0.013	0.033	0.1052	0.0013	0.0014	0.4598	9.5057	0.117466	0.126502	0.06112	0.00082	0.0029	0.31261	0.0339	0.0011	0.0017	39.4	2.2	12		643.3	6.8	18	644.7	7.5	8.1	673	22	33	641	29	100	0.577223
MIR41-Row3-Spot100	5.19	0.13	0.22	0.3163	0.006	0.0062	0.65999	3.16155	0.0599726	0.0619717	0.1192	0.0021	0.0059	0.089301	0.092	0.0028	0.0045	5.68	0.15	1.7		1850	21	36	1771	29	30	1778	52	83	1941	31	88	-8.75837
MIR41-Row3-Spot101	1.012	0.051	0.062	0.1067	0.002	0.0021	0.45228	9.37207	0.175671	0.184455	0.068	0.0031	0.0044	-0.11052	0.035	0.0017	0.0021	5.04	0.29	1.5		707	26	32	654	12	12	694	33	42	885	95	130	-26.1017
MIR41-Row3-Spot102	0.871	0.021	0.037	0.102	0.0013	0.0014	0.43791	9.80392	0.124952	0.134564	0.0613	0.0012	0.0031	0.040129	0.03136	0.00091	0.0015	11	0.34	3.3		636	12	20	626.3	7.4	8	624	18	29	647	43	110	-3.19938
MIR41-Row3-Spot103	1.111	0.032	0.05	0.1244	0.0024	0.0025	0.45937	8.03858	0.155085	0.161547	0.0643	0.0017	0.0034	0.12888	0.03838	0.00087	0.0017	6.46	0.12	1.9		758	15	24	755	14	14	761	17	33	742	57	110	1.75202
MIR41-Row3-Spot104	1.111	0.069	0.079	0.111	0.002	0.002	0.32062	9.00901	0.162324	0.162325	0.0719	0.0051	0.0061	-0.10795	0.0364	0.0012	0.0018	3.534	0.093	1.1		755	32	36	679	11	12	722	23	35	940	130	160	-27.766
MIR41-Row3-Spot105	14.84	0.36	0.63	0.555	0.014	0.014	0.92806	1.8018	0.0454509	0.0454509	0.1911	0.0017	0.0089	0.222	0.1575	0.0071	0.0093	16.11	0.4	4.8		2803	23	40	2842	57	58	2950	120	160	2751	15	77	3.30789
MIR41-Row3-Spot106	0.87	0.022	0.037	0.1016	0.0015	0.0015	0.18559	9.84252	0.145313	0.145313	0.0608	0.0016	0.0032	0.45402	0.0317	0.001	0.0016	5.91	0.14	1.8		635	12	20	623.7	8.5	9	631	20	31	645	58	110	-3.30233
MIR41-Row3-Spot107	1.304	0.027	0.052	0.1394	0.0027	0.0028	0.68141	7.1736	0.138943	0.14409	0.06687	0.00091	0.0032	0.34155	0.04361	0.00077	0.0018	12.26	0.19	3.7		847	12	23	841	15	16	863	15	35	838	27	93	0.357995
MIR41-Row3-Spot108	1.71	0.049	0.076	0.1703	0.004	0.0041	0.81512	5.87199	0.137921	0.141369	0.072	0.0012	0.0035	-0.042377	0.0521	0.0011	0.0022	9.37	0.24	2.8		1011	18	29	1018	21	22	1026	21	43	983	33	98	3.56053
MIR41-Row3-Spot109	0.621	0.017	0.027	0.0812	0.001	0.0011	0.57048	12.3153	0.151666	0.166832	0.0561	0.00089	0.0027	0.022536	0.02459	0.00074	0.0012	11.8	1.6	3.9		490	11	17	504.5	6.7	7.1	491	15	23	454	35	110	11.1233
MIR41-Row3-Spot110	0.764	0.028	0.038	0.0909	0.0016	0.0017	0.4815	11.0011	0.193639	0.205741	0.061	0.0017	0.0033	-0.0046171	0.0288	0.001	0.0015	10.59	0.28	3.2		578	15	21	560.9	9.6	10	573	20	29	629	62	120	-10.8267
MIR41-Row3-Spot111	1.052	0.02	0.041	0.1212	0.002	0.0021	0.36705	8.25083	0.136152	0.14296	0.0617	0.0012	0.0031	0.45459	0.0356	0.001	0.0017	11.37	0.3	3.4		729.5	9.7	20	737	12	12	707	20	33	660	40	110	11.6667
MIR41-Row3-Spot112	0.429	0.013	0.019	0.0589	0.0012	0.0012	0.41562	16.9779	0.3459	0.3459	0.0531	0.0016	0.0029	0.21012	0.01799	0.00039	0.00078	7.08	0.19	2.1		362.2	8.9	14	368.7	7.1	7.3	360.5	7.8	16	336	65	120	9.73214
MIR41-Row3-Spot113	5.46	0.096	0.21	0.342	0.0042	0.0046	0.35581	2.92398	0.0359085	0.0393283	0.1137	0.0021	0.0056	0.39425	0.0942	0.0021	0.0042	8.19	0.25	2.5		1894	15	33	1896	20	22	1819	40	77	1870	37	97	1.39037
MIR41-Row3-Spot114	6.523	0.08	0.24	0.3745	0.004	0.0044	0.42115	2.67023	0.0285204	0.0313725	0.1259	0.0015	0.006	0.44437	0.105	0.0022	0.0046	6.7	0.33	2		2049	11	32	2050	19	21	2017	41	83	2040	22	85	0.490196
MIR41-Row3-Spot115	0.79	0.021	0.034	0.0958	0.0021	0.0021	0.70421	10.4384	0.228817	0.228817	0.059	0.0012	0.003	0.074761	0.02923	0.00063	0.0013	6.62	0.18	2		591	12	19	590	12	13	582	12	25	563	44	110	4.79574
MIR41-Row3-Spot116	5.988	0.078	0.22	0.3452	0.005	0.0053	0.88002	2.89687	0.0419593	0.0444769	0.12276	0.00079	0.0057	0.30288	0.1038	0.0049	0.0063	304	16	92		1974	11	32	1911	24	25	1995	89	110	1996	11	82	-4.25852
MIR41-Row3-Spot117	5.07	0.1	0.2	0.3157	0.0061	0.0062	0.92552	3.16756	0.0612041	0.0622075	0.11426	0.00096	0.0053	0.18256	0.0954	0.0027	0.0045	15.87	0.44	4.8		1831	17	34	1768	30	31	1840	51	84	1868	15	84	-5.35332
MIR41-Row3-Spot118	0.836	0.03	0.041	0.0779	0.0041	0.0041	0.80034	12.837	0.67563	0.67563	0.0771	0.0024	0.0043	0.75431	0.0274	0.001	0.0015	4.48	0.16	1.4		616	17	23	483	24	24	546	21	29	1140	61	110	-57.6316
MIR41-Row3-Spot119	0.894	0.015	0.034	0.1046	0.0016	0.0016	0.71219	9.56023	0.146237	0.146237	0.06102	0.00072	0.0029	0.20095	0.03225	0.00086	0.0015	10	0.26	3		648.2	7.9	18	641.3	9	9.5	641	17	29	638	26	100	0.517241

## Sheet: PlotDat0
Source sheet	Preparation	0.765	0.0934	0	0	0.217708	0.0315113	0.831089	0.0937653	0.843313	0.0967839	0.703312	0.0675449	0.835746	0.0876643	0.981537	0.108702	0.855746	0.0980714	14.1569	0.484749	0.677179	0.0807448	6.81107	0.357797	0.844194	0.0977729	0.898641	0.103153	4.92368	0.310184	7.8185	0.396681	0.856418	0.0987282	7.09255	0.388133	0.78797	0.0925686	6.81731	0.381789	0.894418	0.0958725	0.768074	0.0901613	4.76821	0.311491	5.27316	0.341479
Plot name	Concordia0	0.776	0.0967	0.110692	0.0166736	0.482812	0.0640155	0.828407	0.0946757	0.840585	0.0976077	0.70048	0.0683615	0.833364	0.0884838	0.97874	0.109155	0.85336	0.0988001	14.1177	0.486678	0.675136	0.0813716	6.79221	0.35941	0.841709	0.0985705	0.896047	0.103872	4.9098	0.31256	7.79666	0.398252	0.853889	0.0995201	7.07268	0.389515	0.785507	0.093152	6.79794	0.382922	0.891871	0.0964851	0.765832	0.0908451	4.75529	0.312727	5.25826	0.342333
Plot Type	1	0.636	0.061	0.233637	0.0336251	0.805631	0.097544	0.820588	0.0954828	0.832625	0.098358	0.692425	0.0685817	0.826416	0.0892237	0.970618	0.109368	0.846409	0.0994323	14.0033	0.487596	0.669194	0.0818872	6.73719	0.360342	0.834467	0.0992651	0.888507	0.104422	4.86928	0.314736	7.73295	0.398928	0.846508	0.100246	7.01477	0.390004	0.778385	0.0934557	6.74147	0.383081	0.884474	0.0969125	0.75931	0.0914038	4.71763	0.313321	5.21482	0.342374
1st free col	247	0.777	0.0875	0.370191	0.0508594	1.19873	0.132129	0.808265	0.0961212	0.820078	0.0989739	0.679798	0.0681878	0.815464	0.089824	0.957828	0.109324	0.835455	0.0999169	13.8231	0.48743	0.659834	0.0822499	6.65048	0.360517	0.823056	0.0998006	0.876632	0.10476	4.80541	0.316537	7.63255	0.398653	0.834874	0.100846	6.92349	0.389561	0.767182	0.0934551	6.65248	0.382254	0.872826	0.0971201	0.749036	0.091792	4.6583	0.313225	5.14636	0.341599
Sigma Level	2	0.913	0.1062	0.521861	0.0683809	1.67741	0.167804	0.792438	0.0965392	0.80396	0.0994056	0.663623	0.0672115	0.801396	0.0902359	0.941406	0.109027	0.821385	0.100215	13.5916	0.486191	0.647814	0.0824304	6.53911	0.359921	0.8084	0.100133	0.861385	0.104858	4.72335	0.317816	7.50359	0.397451	0.819928	0.101272	6.80625	0.388222	0.752804	0.0931503	6.53817	0.380506	0.85787	0.0970912	0.735842	0.0919783	4.58209	0.312447	5.05843	0.340071
Absolute Errs	TRUE	0.797	0.09761	0.690319	0.0861946	2.2603	0.204603	0.774388	0.0967028	0.785576	0.0996182	0.64521	0.0657319	0.785352	0.0904262	0.922683	0.108502	0.80534	0.100301	13.3275	0.483981	0.634107	0.0824139	6.41209	0.358602	0.791687	0.100237	0.843999	0.104709	4.62977	0.31847	7.35652	0.395418	0.802882	0.10149	6.67255	0.386096	0.736417	0.092566	6.4078	0.377981	0.840819	0.0968281	0.720798	0.0919477	4.49517	0.311048	4.95814	0.337913
Symbol Type	1	13.19	0.4742	0.877425	0.104305	2.97009	0.242562	0.755577	0.0965988	0.766417	0.0995943	0.626051	0.0638691	0.768631	0.0903795	0.903175	0.107789	0.788619	0.10017	13.0523	0.480978	0.619825	0.0822019	6.27972	0.356668	0.774269	0.100102	0.825885	0.104324	4.53223	0.318446	7.20324	0.39272	0.785116	0.101482	6.53321	0.383354	0.719348	0.0917495	6.27195	0.374881	0.823053	0.096352	0.705123	0.0917025	4.4046	0.309144	4.85364	0.335301
Inverse Plot	FALSE	0.627	0.08	1.08524	0.122718	3.83441	0.281716	0.737529	0.0962357	0.748034	0.0993359	0.607698	0.0617738	0.752589	0.0900994	0.884463	0.106948	0.772577	0.0998313	12.7883	0.477427	0.606123	0.0818116	6.15271	0.354274	0.757559	0.0997405	0.808509	0.103734	4.43864	0.317746	7.05619	0.389574	0.76807	0.101249	6.39952	0.380219	0.70298	0.090767	6.1416	0.37146	0.806012	0.0957016	0.690085	0.0912627	4.31771	0.306888	4.75338	0.332445
Color Plot	FALSE	6.346	0.351	1.31606	0.141438	4.8869	0.322105	0.721707	0.0956429	0.731917	0.098864	0.591638	0.0596158	0.738523	0.0896088	0.868064	0.106047	0.758514	0.0993126	12.5568	0.473614	0.594114	0.0812744	6.04137	0.351615	0.74291	0.0991812	0.79328	0.102988	4.35659	0.316426	6.92726	0.386236	0.753124	0.100809	6.28232	0.376944	0.688638	0.089698	6.02733	0.367993	0.791076	0.0949296	0.676904	0.0906639	4.24153	0.304462	4.66548	0.329577
3D plot	FALSE	0.783	0.0973	1.57243	0.16047	6.16853	0.363766	0.709392	0.0948683	0.719371	0.0982168	0.579172	0.0575699	0.727575	0.0889474	0.855304	0.105157	0.747569	0.098656	12.3766	0.469848	0.584768	0.080634	5.9547	0.348906	0.731508	0.0984695	0.78143	0.102145	4.29271	0.314594	6.82692	0.382976	0.74149	0.100198	6.1911	0.373796	0.677486	0.0886292	5.93839	0.364761	0.779456	0.0940984	0.666647	0.0899547	4.18225	0.302064	4.59706	0.32693
Linear	FALSE	0.835	0.1018	1.85718	0.179819	7.72917	0.40674	0.701583	0.0939748	0.711413	0.0974467	0.571309	0.055802	0.720631	0.0881686	0.847219	0.104353	0.740628	0.0979147	12.2623	0.466435	0.578844	0.0799423	5.89974	0.346367	0.724279	0.097663	0.77392	0.101275	4.2522	0.312398	6.76327	0.380058	0.73411	0.0994659	6.13325	0.371029	0.670426	0.0876472	5.88199	0.362027	0.772093	0.0932755	0.660145	0.0891923	4.14465	0.299888	4.55368	0.324719
Data Range	Q3:U121	4.581	0.3101	2.17345	0.199491	9.62957	0.451068	0.698911	0.0930347	0.708687	0.0966161	0.568688	0.0544551	0.718254	0.0873357	0.844463	0.103698	0.738254	0.0971486	12.2231	0.463651	0.576821	0.0792552	5.88093	0.344203	0.721806	0.0968271	0.771359	0.100447	4.23832	0.310016	6.7415	0.377719	0.731582	0.0986718	6.11345	0.368867	0.66803	0.0868314	5.86269	0.360011	0.769582	0.0925275	0.657926	0.0884387	4.13179	0.298109	4.53884	0.323121
Filled Symbols	FALSE	7.28	0.3872	2.52472	0.21949	11.9437	0.496793	0.701593	0.0921243	0.711415	0.0957923	0.57152	0.0536385	0.720636	0.0865162	0.84726	0.103245	0.74064	0.0964199	12.2623	0.461722	0.578864	0.0786284	5.89979	0.34259	0.724291	0.0960295	0.773953	0.0997283	4.2522	0.30764	6.76334	0.376148	0.734111	0.0978799	6.13332	0.367485	0.670493	0.086248	5.88206	0.358878	0.772129	0.0919149	0.660168	0.0877549	4.14471	0.296873	4.55374	0.322267
ConcAge	FALSE	0.794	0.0987	2.91488	0.239824	14.7617	0.543959	0.709412	0.0913172	0.719375	0.095042	0.579575	0.0534183	0.727584	0.0857763	0.855382	0.103032	0.747591	0.0957877	12.3767	0.460804	0.584806	0.0781128	5.95481	0.341658	0.731533	0.0953349	0.781493	0.0991779	4.29272	0.305464	6.82705	0.375472	0.741492	0.0971545	6.19123	0.366996	0.677615	0.0859443	5.93853	0.358719	0.779526	0.0914875	0.66669	0.0871962	4.18237	0.296279	4.59718	0.322226
ConcSwap	FALSE	6.603	0.3785	3.34823	0.260496	18.1931	0.592611	0.721735	0.0906788	0.731922	0.0944261	0.592202	0.0538122	0.738536	0.085176	0.868172	0.103076	0.758545	0.0953031	12.5569	0.46097	0.594166	0.0777501	6.04152	0.341483	0.742944	0.0947994	0.793368	0.0988399	4.35659	0.303663	6.92745	0.375747	0.753126	0.0965543	6.28251	0.367439	0.688818	0.0859449	6.02752	0.359546	0.791174	0.0912799	0.676964	0.086808	4.2417	0.296375	4.66564	0.323001
1st Symbol-row	1	0.728	0.0897	3.82955	0.281513	IsoLine	IsoLine	0.737562	0.0902608	0.74804	0.0939944	0.608377	0.0547885	0.752604	0.0847641	0.884594	0.103373	0.772615	0.0950054	12.7884	0.462209	0.606186	0.0775696	6.15289	0.342079	0.7576	0.0944665	0.808615	0.0987417	4.43865	0.302384	7.05641	0.376949	0.768072	0.0961279	6.39975	0.368778	0.703196	0.0862497	6.14183	0.361294	0.80613	0.0913088	0.690158	0.0866217	4.31791	0.297153	4.75357	0.324529
		6.34	0.3709	4.36414	0.30288			0.755612	0.0900972	0.766424	0.0937818	0.62679	0.0562681	0.768648	0.0845738	0.903317	0.103898	0.78866	0.0949186	13.0525	0.464419	0.619893	0.0775861	6.27991	0.343398	0.774313	0.0943632	0.826001	0.0988912	4.53223	0.30173	7.20348	0.378982	0.785118	0.0959099	6.53345	0.370904	0.719583	0.086834	6.2722	0.363819	0.823181	0.0915719	0.705202	0.0866523	4.40483	0.298552	4.85386	0.326687
		0.832	0.0942	4.95791	0.324604			0.774423	0.0902012	0.785583	0.0938057	0.645949	0.0581309	0.785369	0.0846205	0.922825	0.104611	0.805381	0.09505	13.3277	0.467422	0.634175	0.0777981	6.41228	0.345332	0.791731	0.0944978	0.844115	0.0992765	4.62977	0.301754	7.35676	0.38168	0.802884	0.0959179	6.67279	0.373646	0.736652	0.0876505	6.40805	0.366919	0.840947	0.092048	0.720877	0.0868975	4.4954	0.300456	4.95836	0.329299
		0.713	0.0893	5.6174	0.34669			0.792471	0.0905643	0.803966	0.0940641	0.664302	0.0602262	0.801411	0.0849006	0.941537	0.105452	0.821423	0.0953887	13.5917	0.470973	0.647877	0.0781884	6.53929	0.347726	0.808441	0.0948595	0.861491	0.0998661	4.72336	0.302454	7.50381	0.384826	0.81993	0.0961513	6.80648	0.376781	0.75302	0.088633	6.5384	0.37034	0.857988	0.0926984	0.735915	0.0873373	4.58229	0.302712	5.05862	0.332155
		4.45	0.3048	6.3499	0.369144			0.808293	0.0911571	0.820083	0.094536	0.680362	0.0623842	0.815477	0.0853912	0.957936	0.106353	0.835486	0.0959074	13.8232	0.474786	0.659886	0.0787256	6.65063	0.350385	0.82309	0.0954188	0.87672	0.100612	4.80541	0.303774	7.63274	0.388164	0.834876	0.0965912	6.92368	0.380056	0.767362	0.089702	6.65267	0.373807	0.872924	0.0934704	0.749096	0.0879361	4.65847	0.305138	5.14652	0.335023
		4.906	0.3323	7.16348	0.391972			0.820608	0.0919317	0.832629	0.0951832	0.692828	0.0644301	0.826425	0.0860526	0.970696	0.107243	0.846431	0.096564	14.0034	0.478552	0.669232	0.079366	6.7373	0.353094	0.834492	0.0961305	0.88857	0.101455	4.86929	0.305606	7.73308	0.391424	0.84651	0.097202	7.0149	0.383204	0.778514	0.0907708	6.74161	0.377039	0.884544	0.0943016	0.759353	0.0886453	4.71775	0.307536	5.21494	0.33767
		6.25	0.366	8.06711	0.415182			0.828417	0.0928252	0.840587	0.0959533	0.700691	0.066198	0.833369	0.0868314	0.978781	0.108047	0.853372	0.0973053	14.1177	0.481965	0.675156	0.0800577	6.79226	0.355633	0.841721	0.096937	0.89608	0.102325	4.9098	0.307802	7.79673	0.394342	0.85389	0.0979341	7.07275	0.385971	0.785574	0.0917528	6.79801	0.379773	0.891907	0.0951245	0.765855	0.0894077	4.75535	0.309712	5.25832	0.339881
		4.178	0.2679	9.07077	0.438778			0.831089	0.0937653	0.843313	0.0967839	0.703312	0.0675449	0.835746	0.0876643	0.981537	0.108702	0.855746	0.0980714	14.1569	0.484749	0.677179	0.0807448	6.81107	0.357797	0.844194	0.0977729	0.898641	0.103153	4.92368	0.310184	7.8185	0.396681	0.856418	0.0987282	7.09255	0.388133	0.78797	0.0925686	6.81731	0.381789	0.894418	0.0958725	0.768074	0.0901613	4.76821	0.311491	5.27316	0.341479
		3.81	0.2593	10.1855	0.462767			Black	Black	Black	Black	Black	Black	Black	Black	Black	Black	Black	Black	Black	Black	Black	Black	Black	Black	Black	Black	Black	Black	Black	Black	Black	Black	Black	Black	Black	Black	Black	Black	Black	Black	Black	Black	Black	Black	Black	Black	Black	Black
		0.888	0.1054	11.4237	0.487157
		0.746	0.0899	12.7989	0.511953
		10.6	0.4561	14.3263	0.537163
		0.779	0.0939	16.0228	0.562793
		0.621	0.0795	17.9071	0.58885
		0.641	0.0828	20	0.615342
		3.28	0.1933	20	0.615342
		1.13	0.112	IsoLine	IsoLine
		5.938	0.3505
		1.666	0.1673
		0.862	0.1039
		0.825	0.0933
		0.763	0.0935
		1.01	0.0968
		0.731	0.0898
		1.441	0.1195
		0.803	0.0866
		0.773	0.0961
		0.857	0.1027
		7.15	0.3732
		0.894	0.1031
		13.76	0.5331
		7.3	0.4035
		3.368	0.2622
		1.753	0.1732
		0.858	0.0996
		4.56	0.3085
		2.767	0.2126
		5.24	0.3401
		6.01	0.3561
		12.95	0.4904
		0.823	0.1012
		0.923	0.1088
		0.748	0.0929
		4.49	0.2893
		4.449	0.3059
		0.781	0.0937
		1	0.1118
		0.886	0.107
		5.89	0.3476
		2.29	0.1863
		0.896	0.1056
		6.758	0.3885
		0.767	0.0918
		4.705	0.2942
		0.761	0.093
		0.839	0.1034
		0.833	0.1014
		0.892	0.1059
		5.46	0.3465
		0.776	0.097
		1.785	0.177
		3.05	0.1615
		7.78	0.4173
		5.12	0.3051
		0.787	0.0955
		2.63	0.1237
		1.555	0.1519
		6.657	0.3722
		0.827	0.097
		0.608	0.07708
		7.64	0.3983
		0.855	0.09778
		0.959	0.1095
		0.819	0.1017
		5.276	0.3274
		0.781	0.0945
		6.024	0.3476
		0.625	0.0807
		4.73	0.2689
		0.822	0.0996
		0.82	0.098
		0.888	0.1068
		0.825	0.0984
		0.885	0.1052
		5.19	0.3163
		1.012	0.1067
		0.871	0.102
		1.111	0.1244
		1.111	0.111
		14.84	0.555
		0.87	0.1016
		1.304	0.1394
		1.71	0.1703
		0.621	0.0812
		0.764	0.0909
		1.052	0.1212
		0.429	0.0589
		5.46	0.342
		6.523	0.3745
		0.79	0.0958
		5.988	0.3452
		5.07	0.3157
		0.836	0.0779
		0.894	0.1046
		IsoLine	IsoLine
[truncated: 196 more columns]

## Sheet: PlotDat2
Source sheet	Preparation	0.781	0.0937	0	0	0.217708	0.0315113	0.842194	0.0939082	0.856716	0.0986481	5.45925	0.32131	0.840194	0.0949197	0.958865	0.103707	0.803522	0.0910857	6.81107	0.357797	0.822074	0.0921303	13.7945	0.494844	7.62731	0.373293	6.28101	0.350231	5.31477	0.322724	0.870283	0.0997042	11.3833	0.469234	0.78797	0.0925686	6.25725	0.350909	6.30612	0.350418	5.52077	0.331398	0.915283	0.101941	7.8185	0.396681	0.916283	0.102751
Plot name	Concordia1	0.82	0.098	0.110692	0.0166736	0.482812	0.0640155	0.839714	0.0943093	0.855222	0.0990313	5.44832	0.322713	0.837703	0.0956176	0.956232	0.104351	0.801178	0.0917187	6.79221	0.35941	0.81984	0.0926257	13.7603	0.495693	7.60798	0.37591	6.27059	0.350988	5.30484	0.323248	0.868432	0.100235	11.3515	0.470554	0.785507	0.093152	6.24633	0.351545	6.28925	0.351346	5.51084	0.332146	0.913445	0.102436	7.79666	0.398252	0.914442	0.103155
Plot Type	1	5.19	0.3163	0.233637	0.0336251	0.805631	0.097544	0.832477	0.0946611	0.850874	0.0993308	5.41645	0.323596	0.830456	0.0961763	0.948556	0.104893	0.794364	0.0922044	6.73719	0.360342	0.813326	0.0930542	13.6604	0.496113	7.55154	0.378307	6.2402	0.35147	5.27587	0.323161	0.863062	0.100617	11.2589	0.470702	0.778385	0.0934557	6.21447	0.351668	6.24005	0.351971	5.48189	0.33251	0.908087	0.102862	7.73295	0.398928	0.909081	0.103465
1st free col	175	0.779	0.0939	0.370191	0.0508594	1.19873	0.132129	0.82107	0.0949351	0.844025	0.0995226	5.36624	0.323888	0.81904	0.0965506	0.936461	0.10529	0.783631	0.0925034	6.65048	0.360517	0.803058	0.0933811	13.503	0.49607	7.46257	0.38029	6.19228	0.351639	5.23023	0.32247	0.854609	0.10082	11.1129	0.469668	0.767182	0.0934551	6.16427	0.351266	6.16248	0.352241	5.43625	0.33246	0.899644	0.103187	7.63255	0.398653	0.900635	0.103656
Sigma Level	2	0.894	0.1031	0.521861	0.0683809	1.67741	0.167804	0.806416	0.0951089	0.835229	0.099591	5.30175	0.323565	0.804381	0.0967102	0.920926	0.105509	0.76985	0.0925915	6.53911	0.359921	0.789869	0.0935799	13.3008	0.495568	7.34828	0.381699	6.13074	0.35148	5.17161	0.32123	0.843757	0.100826	10.9253	0.467534	0.752804	0.0931503	6.09979	0.350373	6.06284	0.352136	5.37764	0.332	0.888799	0.103383	7.50359	0.397451	0.889788	0.103713
Absolute Errs	TRUE	0.746	0.0899	0.690319	0.0861946	2.2603	0.204603	0.789704	0.0951686	0.8252	0.0995305	5.22821	0.322654	0.787665	0.0966421	0.903209	0.105534	0.754137	0.0924615	6.41209	0.358602	0.774827	0.0936345	13.0702	0.494647	7.21793	0.38242	6.06055	0.351008	5.10475	0.319542	0.831385	0.100636	10.7114	0.464474	0.736417	0.092566	6.02625	0.34906	5.94919	0.351663	5.31078	0.331167	0.876431	0.103434	7.35652	0.395418	0.877419	0.103631
Symbol Type	1	6.346	0.351	0.877425	0.104305	2.97009	0.242562	0.772286	0.0951094	0.814749	0.099346	5.15158	0.321228	0.770248	0.0963519	0.884747	0.105361	0.737764	0.092124	6.27972	0.356668	0.759151	0.0935405	12.8298	0.493382	7.08207	0.382393	5.98739	0.350259	5.03508	0.317542	0.818496	0.100265	10.4884	0.460736	0.719348	0.0917495	5.94962	0.347435	5.83076	0.350861	5.24111	0.330029	0.863542	0.103337	7.20324	0.39272	0.86453	0.103417
Inverse Plot	FALSE	0.767	0.0918	1.08524	0.122718	3.83441	0.281716	0.755575	0.094936	0.804724	0.0990525	5.07805	0.319402	0.753539	0.095863	0.867034	0.105005	0.722059	0.0916064	6.15271	0.354274	0.744111	0.0933054	12.5992	0.491876	6.95172	0.381622	5.9172	0.349294	4.96824	0.315394	0.806134	0.0997424	10.2745	0.456622	0.70298	0.090767	5.87609	0.345629	5.71712	0.349795	5.17427	0.328678	0.851176	0.103099	7.05619	0.389574	0.852165	0.103089
Color Plot	FALSE	12.95	0.4904	1.31606	0.141438	4.8869	0.322105	0.740923	0.0946624	0.795937	0.0986737	5.0136	0.317326	0.738894	0.0952151	0.851505	0.104494	0.708293	0.0909505	6.04137	0.351615	0.730926	0.0929485	12.397	0.49025	6.83743	0.380168	5.85567	0.348193	4.90964	0.31327	0.795301	0.0991113	10.087	0.452465	0.688638	0.089698	5.81163	0.343789	5.61748	0.348551	5.11567	0.327223	0.840335	0.10274	6.92726	0.386236	0.841326	0.102672
3D plot	FALSE	7.15	0.3732	1.57243	0.16047	6.16853	0.363766	0.729518	0.0943109	0.789099	0.0982403	4.96343	0.315166	0.727497	0.0944606	0.83942	0.103871	0.697582	0.0902095	5.9547	0.348906	0.720663	0.0924984	12.2396	0.488636	6.74846	0.37815	5.80777	0.347043	4.86404	0.311343	0.786873	0.0984227	9.941	0.448604	0.677486	0.0886292	5.76146	0.342062	5.53993	0.34723	5.07005	0.325783	0.831898	0.102288	6.82692	0.382976	0.832891	0.102201
Linear	FALSE	6.024	0.3476	1.85718	0.179819	7.72917	0.40674	0.722284	0.0939098	0.784764	0.0977875	4.93162	0.313098	0.720273	0.0936608	0.831756	0.103186	0.690794	0.0894434	5.89974	0.346367	0.714154	0.0919918	12.1397	0.487165	6.69202	0.375731	5.77739	0.345939	4.83512	0.30977	0.781534	0.0977322	9.84842	0.445349	0.670426	0.0876472	5.72964	0.34059	5.49073	0.345939	5.04113	0.324474	0.826547	0.101781	6.76327	0.380058	0.827544	0.101713
Data Range	L32:P114	5.07	0.3157	2.17345	0.199491	9.62957	0.451068	0.719806	0.0934918	0.783284	0.0973519	4.92075	0.31129	0.717806	0.0928803	0.829135	0.102493	0.688478	0.0887143	5.88093	0.344203	0.711926	0.0914697	12.1055	0.485956	6.67269	0.373107	5.76699	0.344969	4.82523	0.308676	0.779717	0.0970958	9.81672	0.442966	0.66803	0.0868314	5.71875	0.339491	5.47388	0.344782	5.03123	0.323402	0.824717	0.101259	6.7415	0.377719	0.825717	0.101249
Filled Symbols	FALSE	0.825	0.0984	2.52472	0.21949	11.9437	0.496793	0.722286	0.0930907	0.784778	0.0969687	4.93168	0.309887	0.720297	0.0921824	0.831768	0.101849	0.690822	0.0880813	5.89979	0.34259	0.71416	0.0909743	12.1397	0.485107	6.69202	0.37049	5.77741	0.344212	4.83516	0.308152	0.781568	0.096565	9.84848	0.441646	0.670493	0.086248	5.72967	0.338855	5.49075	0.343854	5.04116	0.322654	0.826555	0.100764	6.76334	0.376148	0.827558	0.100845
ConcAge	FALSE	10.6	0.4561	2.91488	0.239824	14.7617	0.543959	0.729523	0.0927389	0.789126	0.0966692	4.96355	0.309004	0.727544	0.0916237	0.839444	0.101307	0.697636	0.0875956	5.95481	0.341658	0.720674	0.0905458	12.2396	0.484687	6.74846	0.368093	5.8078	0.34373	4.86413	0.308239	0.786938	0.096183	9.94112	0.441498	0.677615	0.0859443	5.76153	0.338732	5.53995	0.343229	5.07011	0.32229	0.831913	0.100338	6.82705	0.375472	0.832919	0.100535
ConcSwap	FALSE	0.728	0.0897	3.34823	0.260496	18.1931	0.592611	0.74093	0.0924649	0.795975	0.0964774	5.01376	0.308712	0.73896	0.0912494	0.851539	0.10091	0.708369	0.0872966	6.04152	0.341483	0.730942	0.0902189	12.397	0.48473	6.83743	0.36611	5.85572	0.343561	4.90977	0.30893	0.795391	0.0959805	10.0871	0.442532	0.688818	0.0859449	5.81173	0.339134	5.61752	0.342959	5.11575	0.32234	0.840356	0.100013	6.92745	0.375747	0.841365	0.100344
1st Symbol-row	1	5.988	0.3452	3.82955	0.281513	IsoLine	IsoLine	0.755584	0.0922911	0.804771	0.096409	5.07825	0.309035	0.753619	0.0910898	0.867074	0.100691	0.72215	0.0872085	6.15289	0.342079	0.744131	0.0900201	12.5992	0.485232	6.95172	0.364701	5.91726	0.34372	4.96839	0.31017	0.806243	0.095974	10.2747	0.444666	0.703196	0.0862497	5.87621	0.340027	5.71716	0.343064	5.17436	0.3228	0.851201	0.0998174	7.05641	0.376949	0.852212	0.100287
		5.89	0.3476	4.36414	0.30288			0.772296	0.0922314	0.8148	0.0964695	5.15179	0.309946	0.770335	0.0911579	0.884791	0.100666	0.737863	0.0873385	6.27991	0.343398	0.759173	0.0899655	12.8298	0.486153	7.08207	0.36398	5.98745	0.344192	5.03525	0.311858	0.818615	0.0961641	10.4886	0.447726	0.719583	0.086834	5.94975	0.34134	5.83081	0.343537	5.24122	0.323633	0.863569	0.099766	7.20348	0.378982	0.864581	0.100369
		5.276	0.3274	4.95791	0.324604			0.789714	0.0922906	0.825251	0.096654	5.22842	0.311372	0.787752	0.0914481	0.903253	0.100839	0.754236	0.087676	6.41228	0.345332	0.774849	0.0900595	13.0702	0.487418	7.21793	0.364007	6.06061	0.344941	5.10492	0.313858	0.831504	0.0965353	10.7116	0.451464	0.736652	0.0876505	6.02638	0.342965	5.94924	0.344339	5.31089	0.324771	0.876458	0.0998631	7.35676	0.38168	0.87747	0.100583
		0.87	0.1016	5.6174	0.34669			0.806425	0.092464	0.835276	0.0969475	5.30195	0.313198	0.804461	0.091937	0.920966	0.101195	0.769941	0.0881936	6.53929	0.347726	0.789889	0.0902946	13.3008	0.488924	7.34828	0.364778	6.1308	0.345906	5.17176	0.316006	0.843866	0.0970576	10.9255	0.455578	0.75302	0.088633	6.09991	0.344771	6.06288	0.345405	5.37773	0.326122	0.888824	0.100101	7.50381	0.384826	0.889835	0.100911
		7.28	0.3872	6.3499	0.369144			0.821077	0.0927376	0.844063	0.0973263	5.3664	0.315274	0.819106	0.0925849	0.936495	0.101706	0.783707	0.0888495	6.65063	0.350385	0.803074	0.0906515	13.503	0.49055	7.46257	0.366232	6.19233	0.347007	5.23036	0.31813	0.854699	0.0976887	11.113	0.459735	0.767362	0.089702	6.16437	0.346611	6.16252	0.346649	5.43633	0.327577	0.899665	0.10046	7.63274	0.388164	0.900674	0.101328
		0.871	0.102	7.16348	0.391972			0.832482	0.0930891	0.850901	0.0977597	5.41657	0.317434	0.830503	0.0933394	0.94858	0.102329	0.794418	0.0895905	6.7373	0.353094	0.813337	0.0911016	13.6604	0.492164	7.55154	0.36825	6.24023	0.348157	5.27596	0.320057	0.863127	0.0983773	11.259	0.463596	0.778514	0.0907708	6.21454	0.348338	6.24007	0.34797	5.48195	0.329017	0.908102	0.100912	7.73308	0.391424	0.909109	0.101799
		0.781	0.0945	8.06711	0.415182			0.839716	0.0934902	0.855236	0.0982125	5.44838	0.319502	0.837727	0.0941392	0.956244	0.103014	0.801206	0.0903566	6.79226	0.355633	0.819846	0.0916082	13.7603	0.493635	7.60798	0.370669	6.27061	0.349261	5.30488	0.32163	0.868466	0.0990678	11.3516	0.466851	0.785574	0.0917528	6.24636	0.34981	6.28927	0.349261	5.51087	0.330326	0.913453	0.101419	7.79673	0.394342	0.914456	0.102287
		5.938	0.3505	9.07077	0.438778			0.842194	0.0939082	0.856716	0.0986481	5.45925	0.32131	0.840194	0.0949197	0.958865	0.103707	0.803522	0.0910857	6.81107	0.357797	0.822074	0.0921303	13.7945	0.494844	7.62731	0.373293	6.28101	0.350231	5.31477	0.322724	0.870283	0.0997042	11.3833	0.469234	0.78797	0.0925686	6.25725	0.350909	6.30612	0.350418	5.52077	0.331398	0.915283	0.101941	7.8185	0.396681	0.916283	0.102751
		4.56	0.3085	10.1855	0.462767			Black	Black	Black	Black	Black	Black	Black	Black	Black	Black	Black	Black	Black	Black	Black	Black	Black	Black	Black	Black	Black	Black	Black	Black	Black	Black	Black	Black	Black	Black	Black	Black	Black	Black	Black	Black	Black	Black	Black	Black	Black	Black
		1.753	0.1732	11.4237	0.487157
		6.657	0.3722	12.7989	0.511953
		7.64	0.3983	14.3263	0.537163
		6.01	0.3561	16.0228	0.562793
		4.45	0.3048	17.9071	0.58885
		4.581	0.3101	20	0.615342
		0.888	0.1054	20	0.615342
		6.25	0.366	IsoLine	IsoLine
		0.761	0.093
		4.449	0.3059
		0.959	0.1095
		6.34	0.3709
		0.913	0.1062
		0.896	0.1056
		3.368	0.2622
		1.304	0.1394
		6.523	0.3745
		0.894	0.1046
		0.885	0.1052
		0.787	0.0955
		13.76	0.5331
		6.603	0.3785
		0.833	0.1014
		5.46	0.342
		0.892	0.1059
		0.713	0.0893
		1.111	0.1244
		5.46	0.3465
		0.923	0.1088
		1.666	0.1673
		5.24	0.3401
		0.608	0.07708
		7.78	0.4173
		6.758	0.3885
		0.822	0.0996
		7.3	0.4035
		0.773	0.0961
		14.84	0.555
		1.71	0.1703
		0.765	0.0934
		0.797	0.09761
		0.857	0.1027
		0.748	0.0929
		0.731	0.0898
		1.785	0.177
		0.79	0.0958
		4.906	0.3323
		0.823	0.1012
		0.835	0.1018
		0.888	0.1068
		0.641	0.0828
		0.627	0.08
		0.862	0.1039
		0.625	0.0807
		0.886	0.107
		0.794	0.0987
		0.783	0.0973
		0.621	0.0795
		0.429	0.0589
		IsoLine	IsoLine
[truncated: 124 more columns]

## Sheet: PlotDat3
Source sheet	Preparation	0.713	0.0893	0.68681	0.0856906	0.703532	0.087376	0.72042	0.0890642	0.737476	0.0907549	0.754701	0.0924482	0.772097	0.0941442	0.678551	0.085	0.68006	0.085	0.677051	0.085	0.685345	0.0856906	0.768074	0.0901613	0.78797	0.0925686	0.786074	0.0915079	0.803522	0.0910857	0.762523	0.0906282
Plot name	Concordia2	0.728	0.0897	0.68675	0.0857235	0.703471	0.0874097	0.720358	0.0890984	0.737412	0.0907898	0.754635	0.0924839	0.772028	0.0941805	0.678551	0.085	0.681926	0.0851895	0.678551	0.0851532	0.702025	0.087376	0.767836	0.090393	0.787703	0.0927855	0.785833	0.0916927	0.803272	0.0913037	0.762188	0.090822
Plot Type	1	0.731	0.0898	0.686577	0.0857538	0.703293	0.0874405	0.720174	0.0891299	0.737223	0.090822	0.754441	0.0925166	0.771829	0.0942139	0.681926	0.0853433	0.685307	0.0855323	0.681926	0.0854971	0.718871	0.0890642	0.767129	0.0906154	0.786927	0.092976	0.785125	0.0918613	0.802533	0.0915097	0.7612	0.0909929
1st free col	35	0.746	0.0899	0.686304	0.0857789	0.703012	0.0874662	0.719886	0.0891561	0.736926	0.0908486	0.754136	0.0925438	0.771516	0.0942416	0.685307	0.0856867	0.688696	0.0858751	0.685307	0.0858412	0.735883	0.0907549	0.765961	0.0908265	0.785648	0.0931386	0.783954	0.0920123	0.801313	0.091702	0.759579	0.0911376
Sigma Level	2	IsoLine	IsoLine	0.685954	0.0857969	0.702651	0.0874846	0.719514	0.0891748	0.736545	0.0908677	0.753743	0.0925633	0.771113	0.0942615	0.688696	0.0860302	0.692091	0.0862181	0.688696	0.0861853	0.753063	0.0924482	0.764341	0.0910247	0.783877	0.0932719	0.782332	0.0921445	0.79962	0.0918789	0.757356	0.0912533
Absolute Errs	TRUE			0.685554	0.0858063	0.70224	0.0874941	0.719091	0.0891846	0.736109	0.0908777	0.753296	0.0925734	0.770653	0.0942718	0.692091	0.0863739	0.695493	0.0865612	0.692091	0.0865296	0.770413	0.0941442	0.762283	0.0912081	0.78163	0.0933747	0.780272	0.0922567	0.797469	0.0920389	0.754576	0.0913376
Symbol Type	1			0.685137	0.0858063	0.701811	0.0874941	0.71865	0.0891846	0.735656	0.0908777	0.75283	0.0925734	0.770174	0.0942718	0.695493	0.0867176	0.698902	0.0869044	0.695493	0.086874	IsoLine	IsoLine	0.759804	0.0913752	0.778925	0.0934461	0.777791	0.0923479	0.79488	0.0921807	0.75129	0.091389
Inverse Plot	FALSE			0.684737	0.0857969	0.7014	0.0874846	0.718227	0.0891748	0.735221	0.0908677	0.752382	0.0925633	0.769714	0.0942615	0.698902	0.0870614	0.702317	0.0872477	0.698902	0.0872185			0.756926	0.0915247	0.775785	0.0934856	0.774911	0.0924173	0.791874	0.092303	0.747565	0.0914065
Color Plot	FALSE			0.684386	0.0857789	0.701039	0.0874662	0.717856	0.0891561	0.734839	0.0908486	0.75199	0.0925438	0.769311	0.0942416	0.702317	0.0874054	0.70574	0.0875911	0.702317	0.0875631			0.753674	0.0916551	0.772238	0.0934928	0.771657	0.0924645	0.788476	0.0924048	0.743472	0.0913897
3D plot	FALSE			0.684114	0.0857538	0.700758	0.0874405	0.717567	0.0891299	0.734542	0.090822	0.751685	0.0925166	0.768997	0.0942139	0.70574	0.0877495	0.709169	0.0879347	0.70574	0.0879078			0.750074	0.0917655	0.768314	0.0934676	0.768056	0.0924889	0.784716	0.0924853	0.73909	0.0913389
Linear	FALSE			0.68394	0.0857235	0.70058	0.0874097	0.717384	0.0890984	0.734354	0.0907898	0.751491	0.0924839	0.768798	0.0941805	0.709169	0.0880936	0.712605	0.0882783	0.709169	0.0882526			0.746158	0.0918548	0.764045	0.0934102	0.764138	0.0924903	0.780625	0.0925437	0.734506	0.0912552
Data Range	L38:P41			0.683881	0.0856906	0.700519	0.087376	0.717321	0.0890642	0.734289	0.0907549	0.751425	0.0924482	0.76873	0.0941442	0.712605	0.0884379	0.716049	0.088622	0.712605	0.0885975			0.741959	0.0919224	0.759469	0.0933213	0.759938	0.0924688	0.776239	0.0925795	0.729809	0.0911401
Filled Symbols	FALSE			0.68394	0.0856576	0.70058	0.0873424	0.717384	0.0890299	0.734354	0.0907199	0.751491	0.0924126	0.768798	0.0941079	0.716049	0.0887823	0.719499	0.0889659	0.716049	0.0889426			0.737513	0.0919675	0.754624	0.0932014	0.755491	0.0924246	0.771595	0.0925925	0.725089	0.090996
ConcAge	TRUE			0.684114	0.0856274	0.700758	0.0873116	0.717567	0.0889984	0.734542	0.0906878	0.751685	0.0923798	0.768997	0.0940745	0.719499	0.0891268	0.722956	0.0893099	0.719499	0.0892877			0.732858	0.0919899	0.749553	0.0930516	0.750835	0.0923579	0.766733	0.0925825	0.720438	0.0908256
ConcSwap	FALSE			0.684386	0.0856022	0.701039	0.0872859	0.717856	0.0889722	0.734839	0.0906611	0.75199	0.0923526	0.769311	0.0940468	0.722956	0.0894714	0.72642	0.0896539	0.722956	0.089633			0.728033	0.0919894	0.744297	0.0928733	0.74601	0.0922694	0.761694	0.0925496	0.715948	0.0906322
1st Symbol-row	1			0.684737	0.0855842	0.7014	0.0872675	0.718227	0.0889535	0.735221	0.090642	0.752382	0.0923332	0.769714	0.0940269	0.72642	0.0898161	0.729891	0.0899981	0.72642	0.0899783			0.723081	0.0919659	0.738903	0.0926679	0.741056	0.0921599	0.756521	0.0924941	0.711706	0.0904196
				0.685137	0.0855749	0.701811	0.087258	0.71865	0.0889437	0.735656	0.0906321	0.75283	0.092323	0.770174	0.0940166	0.729891	0.090161	0.733369	0.0903424	0.729891	0.0903238			0.718042	0.0919196	0.733415	0.0924372	0.736017	0.0920302	0.751258	0.0924165	0.707794	0.0901919
				0.685554	0.0855749	0.70224	0.087258	0.719091	0.0889437	0.736109	0.0906321	0.753296	0.092323	0.770653	0.0940166	0.733369	0.0905059	0.736853	0.0906868	0.733369	0.0906694			0.71296	0.0918511	0.727881	0.0921831	0.730935	0.0918815	0.74595	0.0923174	0.704288	0.0899536
				0.685954	0.0855842	0.702651	0.0872675	0.719514	0.0889535	0.736545	0.090642	0.753743	0.0923332	0.771113	0.0940269	0.736853	0.0908509	0.740345	0.0910313	0.736853	0.0910151			0.707879	0.0917607	0.722348	0.0919078	0.725854	0.0917151	0.740643	0.0921977	0.701256	0.0897093
				0.686304	0.0856022	0.703012	0.0872859	0.719886	0.0889722	0.736926	0.0906611	0.754136	0.0923526	0.771516	0.0940468	0.740345	0.0911961	0.743844	0.0913759	0.740345	0.0913609			0.702841	0.0916494	0.716864	0.0916137	0.720817	0.0915322	0.735381	0.0920584	0.698759	0.0894637
				0.686577	0.0856274	0.703293	0.0873116	0.720174	0.0889984	0.737223	0.0906878	0.754441	0.0923798	0.771829	0.0940745	0.743844	0.0915414	0.74735	0.0917206	0.743844	0.0917068			0.69789	0.091518	0.711474	0.0913032	0.715866	0.0913347	0.73021	0.0919006	0.696843	0.0892217
				0.68675	0.0856576	0.703471	0.0873424	0.720358	0.0890299	0.737412	0.0907199	0.754635	0.0924126	0.772028	0.0941079	0.74735	0.0918867	0.750863	0.0920655	0.74735	0.0920528			0.693068	0.0913677	0.706226	0.0909791	0.711045	0.091124	0.725174	0.0917258	0.695547	0.088988
				0.68681	0.0856906	0.703532	0.087376	0.72042	0.0890642	0.737476	0.0907549	0.754701	0.0924482	0.772097	0.0941442	0.750863	0.0922322	0.754384	0.0924104	0.750863	0.092399			0.688416	0.0911997	0.701163	0.0906441	0.706394	0.090902	0.720316	0.0915354	0.694895	0.088767
				ConcTikEll	ConcTikEll	ConcTikEll	ConcTikEll	ConcTikEll	ConcTikEll	ConcTikEll	ConcTikEll	ConcTikEll	ConcTikEll	ConcTikEll	ConcTikEll	0.754384	0.0925778	0.757911	0.0927555	0.754384	0.0927452			0.683973	0.0910155	0.696329	0.090301	0.701952	0.0906706	0.715676	0.0913311	0.694901	0.0885631
																0.757911	0.0929235	0.761445	0.0931006	0.757911	0.0930916			0.679778	0.0908168	0.691765	0.0899528	0.697759	0.0904318	0.711295	0.0911146	0.695564	0.0883803
																0.761445	0.0932693	0.764986	0.0934459	0.761445	0.093438			0.675867	0.090605	0.687511	0.0896024	0.693849	0.0901876	0.707211	0.0908877	0.696872	0.0882221
																0.764986	0.0936152	0.768535	0.0937913	0.764986	0.0937846			0.672273	0.0903821	0.683602	0.0892529	0.690256	0.0899401	0.703457	0.0906523	0.698798	0.0880917
																0.768535	0.0939613	0.77209	0.0941367	0.768535	0.0941313			0.669026	0.09015	0.680072	0.0889072	0.687011	0.0896915	0.700066	0.0904106	0.701306	0.0879914
																0.77209	0.0943074	0.775653	0.0944823	0.77209	0.0944781			0.666154	0.0899107	0.67695	0.0885682	0.684141	0.0894437	0.697068	0.0901645	0.704347	0.0879234
																0.775653	0.0946536	0.779223	0.094828	0.775653	0.094825			0.663682	0.0896661	0.674264	0.0882389	0.681671	0.089199	0.694486	0.0899161	0.707861	0.0878889
																0.779223	0.095	0.781002	0.095	0.777454	0.095			0.66163	0.0894184	0.672037	0.0879221	0.679621	0.0889594	0.692344	0.0896676	0.711779	0.0878885
																0.779223	0.095	ConcBand	ConcBand	ConcBand	ConcBand			0.660017	0.0891697	0.670287	0.0876204	0.67801	0.0887269	0.69066	0.0894211	0.716027	0.0879224
																IsoLine	IsoLine							0.658856	0.0889221	0.66903	0.0873365	0.676852	0.0885036	0.689448	0.0891787	0.720521	0.0879898
																								0.658157	0.0886778	0.668275	0.0870727	0.676155	0.0882914	0.688719	0.0889424	0.725173	0.0880894
																								0.657926	0.0884387	0.66803	0.0868314	0.675926	0.0880921	0.688478	0.0887143	0.729893	0.0882193
																								0.658164	0.088207	0.668297	0.0866145	0.676167	0.0879073	0.688728	0.0884963	0.73459	0.088377
																								0.658871	0.0879846	0.669073	0.086424	0.676875	0.0877387	0.689467	0.0882903	0.739171	0.0885594
																								0.660039	0.0877735	0.670352	0.0862614	0.678046	0.0875877	0.690687	0.088098	0.743548	0.0887629
																								0.661659	0.0875753	0.672123	0.0861281	0.679668	0.0874555	0.69238	0.0879211	0.747635	0.0889835
																								0.663717	0.0873919	0.67437	0.0860253	0.681728	0.0873433	0.694531	0.0877611	0.751353	0.0892171
																								0.666196	0.0872248	0.677075	0.0859539	0.684209	0.0872521	0.69712	0.0876193	0.75463	0.089459
																								0.669074	0.0870753	0.680215	0.0859144	0.687089	0.0871827	0.700126	0.087497	0.757401	0.0897045
																								0.672326	0.0869449	0.683762	0.0859072	0.690343	0.0871355	0.703524	0.0873952	0.759614	0.0899489
																								0.675926	0.0868345	0.687686	0.0859324	0.693944	0.0871111	0.707284	0.0873147	0.761223	0.0901874
																								0.679842	0.0867452	0.691955	0.0859898	0.697862	0.0871097	0.711375	0.0872563	0.7622	0.0904153
																								0.684041	0.0866776	0.696531	0.0860787	0.702062	0.0871312	0.715761	0.0872205	0.762523	0.0906282
																								0.688487	0.0866325	0.701376	0.0861986	0.706509	0.0871754	0.720405	0.0872075
																								0.693142	0.0866101	0.706447	0.0863484	0.711165	0.0872421	0.725267	0.0872175
																								0.697967	0.0866106	0.711703	0.0865267	0.71599	0.0873306	0.730306	0.0872504
																								0.702919	0.0866341	0.717097	0.0867321	0.720944	0.0874401	0.735479	0.0873059
																								0.707958	0.0866804	0.722585	0.0869628	0.725983	0.0875698	0.740742	0.0873835
																								0.71304	0.0867489	0.728119	0.0872169	0.731065	0.0877185	0.74605	0.0874826
																								0.718121	0.0868393	0.733652	0.0874922	0.736146	0.0878849	0.751357	0.0876023
																								0.723159	0.0869506	0.739136	0.0877863	0.741183	0.0880678	0.756619	0.0877416
																								0.72811	0.087082	0.744526	0.0880968	0.746134	0.0882653	0.76179	0.0878994
																								0.732932	0.0872323	0.749774	0.0884209	0.750955	0.088476	0.766826	0.0880742
																								0.737584	0.0874003	0.754837	0.0887559	0.755606	0.088698	0.771684	0.0882646
																								0.742027	0.0875845	0.759671	0.089099	0.760048	0.0889294	0.776324	0.0884689
																								0.746222	0.0877832	0.764235	0.0894472	0.764241	0.0891682	0.780705	0.0886854
																								0.750133	0.087995	0.768489	0.0897976	0.768151	0.0894124	0.784789	0.0889123
																								0.753727	0.0882179	0.772398	0.0901471	0.771744	0.0896599	0.788543	0.0891477
																								0.756974	0.08845	0.775928	0.0904928	0.774989	0.0899085	0.791934	0.0893894
																								0.759846	0.0886893	0.77905	0.0908318	0.777859	0.0901563	0.794932	0.0896355
																								0.762318	0.0889339	0.781736	0.0911611	0.780329	0.090401	0.797514	0.0898839
																								0.76437	0.0891816	0.783963	0.0914779	0.782379	0.0906406	0.799656	0.0901324
																								0.765983	0.0894303	0.785713	0.0917796	0.78399	0.0908731	0.80134	0.0903789
																								0.767144	0.0896779	0.78697	0.0920635	0.785148	0.0910964	0.802552	0.0906213
																								0.767843	0.0899222	0.787725	0.0923273	0.785845	0.0913086	0.803281	0.0908576
																								0.768074	0.0901613	0.78797	0.0925686	0.786074	0.0915079	0.803522	0.0910857
																								Black	Black	Black	Black	Black	Black	Black	Black

## Sheet: PlotDat9
Source sheet	Preparation	0.3	618.502	1	368.7	7.3
Plot name	Average0	83.7	618.502	2	478.7	6
Plot Type	15			3	492.9	12
1st free col	8			4	495.9	12
Sigma Level	2			5	500.1	7.9
Absolute Errs	TRUE			6	512.6	12
Symbol Type	1			7	551.6	13
Inverse Plot	FALSE			8	554	18
Color Plot	FALSE			9	554.2	13
3D plot	FALSE			10	555.1	13
Linear	FALSE			11	566.3	9
Data Range	I32:J114			12	572.7	7.3
Filled Symbols	FALSE			13	573	8.4
ConcAge	FALSE			14	576	16
ConcSwap	FALSE			15	577.1	7
1st Symbol-row	1			16	578.7	13
				17	582.1	9.1
				18	588	8.6
				19	590	13
				20	591.2	9.3
				21	598.2	14
				22	600.4	13
				23	602.4	7.8
				24	605	12
				25	606.9	14
				26	612	11
				27	621.3	9
				28	622.5	8
				29	623.7	9
				30	625	15
				31	626.3	8
				32	630.3	9
				33	632	12
				34	637	17
				35	641.3	9.5
				36	644.7	8.1
				37	645.7	15
				38	646.8	9.1
				39	649.1	9.9
				40	650.5	15
				41	654	11
				42	655.1	9.1
				43	666	7.4
				44	670	14
				45	755	14
				46	841	16
				47	983	98
				48	997	23
				49	1003	63
				50	1049	60
				51	1499	49
				52	1721	52
				53	1737	73
				54	1753	78
				55	1763	73
				56	1772	59
				57	1841	51
				58	1868	84
				59	1870	97
				60	1882	53
				61	1894	86
				62	1941	88
				63	1983	72
				64	1992	46
				65	1996	82
				66	2002	55
				67	2021	70
				68	2032	70
				69	2040	85
				70	2043	82
				71	2050	70
				72	2058	46
				73	2077	82
				74	2106	69
				75	2120	49
				76	2179	70
				77	2187	46
				78	2194	49
				79	2194	79
				80	2545	66
				81	2730	43
				82	2751	77
				83	2769	42
				IsoLine	IsoLine	IsoLine	IsoLine

## Sheet: PlotDat11
Source sheet	Preparation	0.429	0.0589	0.3	0.0421901	0.343738	0.0476374	0.452254	0.0595124	0.621	0.0795	0.669955	0.0795013	0.677179	0.0807448	0.655597	0.0809458	0.621	0.0795	0.652584	0.0804759	0.624198	0.080251	0.713	0.0893	0.768074	0.0901613	0.78797	0.0925686	0.786074	0.0915079	0.803522	0.0910857	0.713	0.0893	0.713	0.0893	0.768074	0.0901613	0.78797	0.0925686	0.786074	0.0915079	0.803522	0.0910857	0.713	0.0893	0.762523	0.0906282
Plot name	Concordia4	IsoLine	IsoLine	0.321113	0.0448391	0.411563	0.0557947	0.451302	0.0598637	0.627	0.08	0.668885	0.0800102	0.676075	0.0812133	0.654354	0.0813787	0.627	0.08	0.651431	0.080868	IsoLine	IsoLine	0.728	0.0897	0.766862	0.0906728	0.786635	0.0930222	0.784857	0.0919034	0.802255	0.0915624	0.728	0.0897	0.728	0.0897	0.766862	0.0906728	0.786635	0.0930222	0.784857	0.0919034	0.802255	0.0915624	0.728	0.0897	0.76114	0.0910001
Plot Type	1			0.343738	0.0476374	0.482812	0.0640155	0.448543	0.0601369	0.625	0.0807	0.665723	0.0804968	0.672827	0.0816288	0.650733	0.0817566	0.625	0.0807	0.648071	0.0812101			0.731	0.0898	0.763297	0.0911244	0.782737	0.0933306	0.781287	0.0922069	0.798529	0.0919664	0.731	0.0898	0.731	0.0898	0.763297	0.0911244	0.782737	0.0933306	0.781287	0.0922069	0.798529	0.0919664	0.731	0.0898	0.757126	0.0912623
1st free col	149			0.366749	0.0504431	0.557657	0.0723004	0.444201	0.0603099	IsoLine	IsoLine	0.660605	0.0809398	0.667575	0.0819731	0.645027	0.082049	IsoLine	IsoLine	0.642778	0.0814745			0.746	0.0899	0.757533	0.0914963	0.776447	0.0934803	0.775518	0.0924052	0.792507	0.0922802	0.746	0.0899	0.746	0.0899	0.757533	0.0914963	0.776447	0.0934803	0.775518	0.0924052	0.792507	0.0922802	0.746	0.0899	0.750807	0.0913934
Sigma Level	2			0.390155	0.0532563	0.636279	0.0806498	0.438628	0.0603686			0.653757	0.0813199	0.66055	0.0822312	0.637699	0.082232			0.635979	0.0816398			IsoLine	IsoLine	0.749822	0.0917721	0.768039	0.0934647	0.767804	0.0924897	0.784453	0.0924899	IsoLine	IsoLine	IsoLine	IsoLine	0.749822	0.0917721	0.768039	0.0934647	0.767804	0.0924897	0.784453	0.0924899	IsoLine	IsoLine	0.742694	0.0913829
Absolute Errs	TRUE			0.413962	0.0560771	0.718871	0.0890642	0.432275	0.0603084			0.645477	0.0816205	0.652059	0.0823917	0.629342	0.0822909			0.628226	0.0816926					0.740503	0.0919399	0.757882	0.0932847	0.758481	0.0924566	0.774718	0.0925864					0.740503	0.0919399	0.757882	0.0932847	0.758481	0.0924566	0.774718	0.0925864			0.733445	0.0912317
Symbol Type	1			0.438176	0.0589054	0.805631	0.097544	0.425656	0.0601341			0.636128	0.0818283	0.642473	0.0824477	0.620633	0.082221			0.620147	0.0816286					0.729981	0.0919923	0.746419	0.092948	0.747957	0.0923074	0.763728	0.0925655					0.729981	0.0919923	0.746419	0.092948	0.747957	0.0923074	0.763728	0.0925655			0.72381	0.090952
Inverse Plot	FALSE			0.462805	0.0617414	0.89677	0.10609	0.419308	0.0598598			0.626117	0.0819345	0.632211	0.0823968	0.612278	0.0820278			0.612396	0.081453					0.718717	0.0919271	0.73415	0.0924693	0.736693	0.0920486	0.751963	0.0924281					0.718717	0.0919271	0.73415	0.0924693	0.736693	0.0920486	0.751963	0.0924281			0.714568	0.0905664
Color Plot	FALSE			0.487856	0.0645849	0.99251	0.114702	0.413746	0.0595078			0.615883	0.0819342	0.62172	0.082241	0.604954	0.081727			0.605601	0.08118					0.707203	0.0917471	0.721613	0.0918696	0.725179	0.0916916	0.739938	0.0921802					0.707203	0.0917471	0.721613	0.0918696	0.725179	0.0916916	0.739938	0.0921802			0.706468	0.0901062
3D plot	FALSE			0.513336	0.067436	1.09308	0.123382	0.409419	0.0591065			0.605872	0.0818275	0.611461	0.0819874	0.599253	0.0813431			0.600312	0.0808317					0.695943	0.09146	0.709355	0.0911751	0.71392	0.0912519	0.728177	0.0918327					0.695943	0.09146	0.709355	0.0911751	0.71392	0.0912519	0.728177	0.0918327			0.700167	0.0896087
Linear	FALSE			0.539252	0.0702947	1.19873	0.132129	0.406678	0.0586885			0.596522	0.0816192	0.601881	0.0816469	0.595639	0.080907			0.596959	0.0804364					0.685428	0.0910786	0.697912	0.0904161	0.703407	0.0907487	0.717196	0.0914007					0.685428	0.0910786	0.697912	0.0904161	0.703407	0.0907487	0.717196	0.0914007			0.696175	0.0891142
Data Range	L32:P32			0.565612	0.0731611	IsoLine	IsoLine	0.405746	0.0582876			0.588243	0.0813182	0.593398	0.0812344	0.594403	0.0804542			0.595812	0.0800261					0.676118	0.0906195	0.687784	0.0896258	0.6941	0.0902041	0.707473	0.0909031					0.676118	0.0906195	0.687784	0.0896258	0.6941	0.0902041	0.707473	0.0909031			0.694816	0.0886627
Filled Symbols	FALSE			0.592423	0.0760352			0.406698	0.0579363			0.581395	0.0809377	0.586384	0.080768	0.595646	0.0800213			0.596965	0.079634					0.668421	0.0901027	0.679414	0.0888388	0.686406	0.0896418	0.699434	0.0903617					0.668421	0.0901027	0.679414	0.0888388	0.686406	0.0896418	0.699434	0.0903617			0.696199	0.0882908
ConcAge	FALSE			0.619693	0.078917			0.409457	0.0576631			0.576277	0.0804944	0.581145	0.080268	0.599267	0.0796434			0.600325	0.0792918					0.662671	0.0895508	0.673167	0.0880894	0.680661	0.0890864	0.693431	0.0898001					0.662671	0.0895508	0.673167	0.0880894	0.680661	0.0890864	0.693431	0.0898001			0.700213	0.0880286
ConcSwap	FALSE			0.647431	0.0818065			0.413799	0.0574901			0.573115	0.0800076	0.577911	0.0797562	0.604973	0.079351			0.605618	0.0790274					0.659121	0.0889879	0.669316	0.0874103	0.677116	0.0885622	0.689725	0.0892428					0.659121	0.0889879	0.669316	0.0874103	0.677116	0.0885622	0.689725	0.0892428			0.706532	0.0878975
1st Symbol-row	1			0.675643	0.0847037			0.419372	0.0574314			0.572045	0.0794987	0.576821	0.0792552	0.612301	0.079168			0.612416	0.0788621					0.657926	0.0884387	0.66803	0.0868314	0.675926	0.0880921	0.688478	0.0887143					0.657926	0.0884387	0.66803	0.0868314	0.675926	0.0880921	0.688478	0.0887143			0.714645	0.0879079
				0.704339	0.0876087			0.425725	0.0574916			0.573115	0.0789898	0.577925	0.0787867	0.620658	0.0791091			0.620169	0.0788093					0.659138	0.0879272	0.669365	0.0863778	0.677143	0.0876966	0.689745	0.0882376					0.659138	0.0879272	0.669365	0.0863778	0.677143	0.0876966	0.689745	0.0882376			0.723894	0.0880592
				0.733526	0.0905215			0.432344	0.0576659			0.576277	0.0785032	0.581173	0.0783712	0.629367	0.079179			0.628249	0.0788733					0.662703	0.0874756	0.673263	0.0860694	0.680713	0.0873931	0.693471	0.0878336					0.662703	0.0874756	0.673263	0.0860694	0.680713	0.0873931	0.693471	0.0878336			0.733529	0.0883389
				0.763213	0.0934421			0.438692	0.0579402			0.581395	0.0780602	0.586425	0.0780269	0.637722	0.0793722			0.636	0.0790489					0.668467	0.0871037	0.679553	0.0859197	0.686482	0.0871948	0.699493	0.0875198					0.668467	0.0871037	0.679553	0.0859197	0.686482	0.0871948	0.699493	0.0875198			0.742771	0.0887245
				0.793408	0.0963705			0.444254	0.0582922			0.588243	0.0776801	0.59345	0.0777688	0.645046	0.079673			0.642795	0.0793219					0.676178	0.0868279	0.687961	0.0859353	0.694196	0.0871103	0.707547	0.0873101					0.676178	0.0868279	0.687961	0.0859353	0.694196	0.0871103	0.707547	0.0873101			0.750871	0.0891847
				0.824121	0.0993067			0.448581	0.0586935			0.596523	0.0773795	0.601941	0.0776083	0.650747	0.0800569			0.648084	0.0796702					0.685497	0.0866601	0.698118	0.0861153	0.703519	0.0871434	0.717282	0.0872136					0.685497	0.0866601	0.698118	0.0861153	0.703519	0.0871434	0.717282	0.0872136			0.757172	0.0896822
				0.855359	0.102251			0.451322	0.0591115			0.605872	0.0771717	0.611527	0.0775523	0.654361	0.080493			0.651437	0.0800655					0.696019	0.0866077	0.709581	0.086452	0.714043	0.0872926	0.728272	0.0872345					0.696019	0.0866077	0.709581	0.086452	0.714043	0.0872926	0.728272	0.0872345			0.761164	0.0901767
				0.887132	0.105203			0.452254	0.0595124			0.615883	0.0770655	0.621789	0.0776032	0.655597	0.0809458			0.652584	0.0804759					0.707283	0.0866729	0.72185	0.0869307	0.725307	0.0875514	0.740037	0.0873719					0.707283	0.0866729	0.72185	0.0869307	0.725307	0.0875514	0.740037	0.0873719			0.762523	0.0906282
				0.91945	0.108163			Black	Black			0.626117	0.0770658	0.63228	0.077759	Black	Black									0.718797	0.0868529	0.734387	0.0875304	0.736821	0.0879084	0.752062	0.0876198					0.718797	0.0868529	0.734387	0.0875304	0.736821	0.0879084	0.752062	0.0876198
				0.952321	0.111131							0.636128	0.0771725	0.642539	0.0780126											0.730057	0.08714	0.746645	0.0882249	0.74808	0.0883481	0.763823	0.0879673					0.730057	0.08714	0.746645	0.0882249	0.74808	0.0883481	0.763823	0.0879673
				0.985755	0.114106							0.645478	0.0773808	0.652119	0.0783531											0.740572	0.0875214	0.758088	0.0889839	0.758593	0.0888513	0.774804	0.0883993					0.740572	0.0875214	0.758088	0.0889839	0.758593	0.0888513	0.774804	0.0883993
				1.01976	0.11709							0.653757	0.0776818	0.660602	0.0787656											0.749882	0.0879805	0.768216	0.0897742	0.7679	0.0893959	0.784527	0.0888969					0.749882	0.0879805	0.768216	0.0897742	0.7679	0.0893959	0.784527	0.0888969
				1.05435	0.120082							0.660605	0.0780623	0.667616	0.079232											0.757579	0.0884973	0.776586	0.0905612	0.775594	0.0899582	0.792566	0.0894383					0.757579	0.0884973	0.776586	0.0905612	0.775594	0.0899582	0.792566	0.0894383
				1.08953	0.123082							0.665723	0.0785056	0.672855	0.079732											0.763329	0.0890492	0.782833	0.0913106	0.781339	0.0905136	0.798569	0.0899999					0.763329	0.0890492	0.782833	0.0913106	0.781339	0.0905136	0.798569	0.0899999
				1.12531	0.126089							0.668885	0.0789924	0.676089	0.0802438											0.766879	0.0896121	0.786684	0.0919897	0.784884	0.0910378	0.802275	0.0905572					0.766879	0.0896121	0.786684	0.0919897	0.784884	0.0910378	0.802275	0.0905572
				1.16171	0.129105							0.669955	0.0795013	0.677179	0.0807448											0.768074	0.0901613	0.78797	0.0925686	0.786074	0.0915079	0.803522	0.0910857					0.768074	0.0901613	0.78797	0.0925686	0.786074	0.0915079	0.803522	0.0910857
				1.19873	0.132129							Black	Black	Black	Black											Black	Black	Black	Black	Black	Black	Black	Black					Black	Black	Black	Black	Black	Black	Black	Black
				1.2	0.132231
				IsoLine	IsoLine
[truncated: 98 more columns]

## Sheet: PlotDat10
Source sheet	Preparation	0.429	0.0589	0.3	0.042188	0.343738	0.0476374	0.452254	0.0595124	0.641045	0.077297	0.669955	0.0795013	0.677179	0.0807448	0.655597	0.0809458	0.689955	0.0845866	0.768074	0.0901613	0.78797	0.0925686	0.786074	0.0915079	0.803522	0.0910857	0.822074	0.0921303	0.799403	0.0937689	0.813627	0.0936555	0.831089	0.0937653	0.842194	0.0939082	0.840194	0.0949197	0.820164	0.0952594	0.827388	0.095702	0.831612	0.0976134	0.829298	0.0968025	0.844194	0.0977729
Plot name	Concordia3	0.608	0.07708	0.307722	0.0431638	0.411563	0.0557947	0.451302	0.0598637	0.639704	0.0776275	0.668885	0.0800102	0.676075	0.0812133	0.654354	0.0813787	0.688871	0.0849317	0.766862	0.0906728	0.786635	0.0930222	0.784857	0.0919034	0.802255	0.0915624	0.820869	0.0924986	0.797315	0.0940673	0.811489	0.0940749	0.829641	0.0944401	0.839714	0.0943093	0.838847	0.0954429	0.819301	0.0955903	0.826503	0.096077	0.830686	0.0979524	0.828063	0.0971672	0.842852	0.0983653
Plot Type	1	0.621	0.0795	0.325608	0.0453982	0.482812	0.0640155	0.448543	0.0601369	0.635795	0.0779137	0.665723	0.0804968	0.672827	0.0816288	0.650733	0.0817566	0.685695	0.0851836	0.763297	0.0911244	0.782737	0.0933306	0.781287	0.0922069	0.798529	0.0919664	0.817308	0.0928363	0.791232	0.0942711	0.805262	0.0944073	0.825368	0.0950695	0.832477	0.0946611	0.834885	0.0958987	0.816765	0.0958735	0.823892	0.0964267	0.827982	0.0981974	0.824422	0.0974852	0.838894	0.0989111
1st free col	203	0.627	0.08	0.343738	0.0476374	0.557657	0.0723004	0.444201	0.0603099	0.629634	0.0781324	0.660605	0.0809398	0.667575	0.0819731	0.645027	0.082049	0.680566	0.0853314	0.757533	0.0914963	0.776447	0.0934803	0.775518	0.0924052	0.792507	0.0922802	0.81155	0.0931287	0.781646	0.0943638	0.795448	0.0946257	0.818457	0.0956259	0.82107	0.0949351	0.828481	0.0962672	0.812665	0.0960968	0.819669	0.0967359	0.823618	0.0983376	0.818533	0.0977427	0.832494	0.0993866
Sigma Level	2	0.625	0.0807	0.362116	0.0498813	0.636279	0.0806498	0.438628	0.0603686	0.62172	0.0782658	0.653757	0.0813199	0.66055	0.0822312	0.637699	0.082232	0.673707	0.0853685	0.749822	0.0917721	0.768039	0.0934647	0.767804	0.0924897	0.784453	0.0924899	0.803844	0.093363	0.769335	0.094338	0.782844	0.0947123	0.809209	0.096085	0.806416	0.0951089	0.819914	0.0965321	0.807182	0.0962502	0.814018	0.0969912	0.817785	0.0983669	0.810654	0.0979284	0.82393	0.0997708
Absolute Errs	TRUE	0.641	0.0828	0.380745	0.0521301	0.718871	0.0890642	0.432275	0.0603084	0.612695	0.0783031	0.645477	0.0816205	0.652059	0.0823917	0.629342	0.0822909	0.665419	0.0852934	0.740503	0.0919399	0.757882	0.0932847	0.758481	0.0924566	0.774718	0.0925864	0.794528	0.0935291	0.755296	0.0941957	0.76847	0.0946603	0.798029	0.0964268	0.789704	0.0951686	0.809559	0.0966821	0.800554	0.0963272	0.807186	0.0971812	0.810737	0.098284	0.801129	0.0980342	0.813577	0.100047
Symbol Type	1	0.713	0.0893	0.399629	0.0543837	0.805631	0.097544	0.425656	0.0601341	0.603289	0.0782414	0.636128	0.0818283	0.642473	0.0824477	0.620633	0.082221	0.656064	0.0851093	0.729981	0.0919923	0.746419	0.092948	0.747957	0.0923074	0.763728	0.0925655	0.784009	0.0936195	0.740665	0.0939484	0.753491	0.0944737	0.785405	0.0966363	0.772286	0.0951094	0.797868	0.0967104	0.793072	0.0963242	0.799472	0.0972978	0.802783	0.0980925	0.790375	0.0980555	0.801889	0.100203
Inverse Plot	FALSE	0.728	0.0897	0.418772	0.0566422	0.89677	0.10609	0.419308	0.0598598	0.594266	0.0780855	0.626117	0.0819345	0.632211	0.0823968	0.612278	0.0820278	0.64605	0.0848243	0.718717	0.0919271	0.73415	0.0924693	0.736693	0.0920486	0.751963	0.0924281	0.772746	0.0936305	0.726628	0.0936161	0.73912	0.0941677	0.77189	0.0967044	0.755575	0.094936	0.785353	0.0966159	0.785062	0.0962416	0.791213	0.0973358	0.794271	0.0978009	0.778862	0.0979913	0.789374	0.100233
Color Plot	FALSE	0.731	0.0898	0.438176	0.0589054	0.99251	0.114702	0.413746	0.0595078	0.586354	0.0778482	0.615883	0.0819342	0.62172	0.082241	0.604954	0.081727	0.635816	0.0844508	0.707203	0.0917471	0.721613	0.0918696	0.725179	0.0916916	0.739938	0.0921802	0.761232	0.0935614	0.714323	0.0932259	0.726522	0.0937672	0.758074	0.096628	0.740923	0.0946624	0.77256	0.0964028	0.776874	0.0960829	0.782769	0.0972935	0.785571	0.0974218	0.767093	0.0978444	0.776581	0.100134
3D plot	FALSE	0.746	0.0899	0.457846	0.0611736	IsoLine	IsoLine	0.409419	0.0591065	0.580197	0.0775487	0.605872	0.0818275	0.611461	0.0819874	0.599253	0.0813431	0.625808	0.0840051	0.695943	0.09146	0.709355	0.0911751	0.71392	0.0912519	0.728177	0.0918327	0.749971	0.0934154	0.704746	0.0928092	0.716717	0.0933045	0.74456	0.0964106	0.729518	0.0943109	0.760049	0.0960802	0.768867	0.0958549	0.774511	0.0971729	0.777066	0.0969718	0.755581	0.0976213	0.764069	0.099911
Linear	FALSE	0.767	0.0918	0.477784	0.0634465			0.406678	0.0586885	0.576292	0.0772112	0.596522	0.0816192	0.601881	0.0816469	0.595639	0.080907	0.616464	0.0835068	0.685428	0.0910786	0.697912	0.0904161	0.703407	0.0907487	0.717196	0.0914007	0.739453	0.0931987	0.698674	0.0923999	0.7105	0.0928171	0.73194	0.0960616	0.722284	0.0939098	0.748365	0.0956623	0.76139	0.0955678	0.766798	0.0969792	0.769125	0.0964706	0.744831	0.0973317	0.752384	0.0995741
Data Range	L32:P114	0.748	0.0929	0.497996	0.0657244			0.405746	0.0582876	0.574955	0.076863	0.588243	0.0813182	0.593398	0.0812344	0.594403	0.0804542	0.608193	0.0829776	0.676118	0.0906195	0.687784	0.0896258	0.6941	0.0902041	0.707473	0.0909031	0.73014	0.092921	0.696597	0.0920311	0.708373	0.0923445	0.720764	0.0955962	0.719806	0.0934918	0.738021	0.0951675	0.75477	0.095234	0.759968	0.0967208	0.762097	0.0959401	0.735312	0.0969883	0.742037	0.0991379
Filled Symbols	FALSE	0.761	0.093	0.518484	0.0680071			0.406698	0.0579363	0.576296	0.0765325	0.581395	0.0809377	0.586384	0.080768	0.595646	0.0800213	0.601355	0.0824406	0.668421	0.0901027	0.679414	0.0888388	0.686406	0.0896418	0.699434	0.0903617	0.722438	0.0925942	0.698685	0.0917327	0.710511	0.0919251	0.711522	0.0950349	0.722286	0.0930907	0.729468	0.0946172	0.749297	0.0948681	0.75432	0.0964091	0.756289	0.0954035	0.72744	0.0966061	0.73348	0.0986214
ConcAge	FALSE	0.765	0.0934	0.539252	0.0702947			0.409457	0.0576631	0.580205	0.0762463	0.576277	0.0804944	0.581145	0.080268	0.599267	0.0796434	0.59625	0.0819194	0.662671	0.0895508	0.673167	0.0880894	0.680661	0.0890864	0.693431	0.0898001	0.716683	0.0922327	0.704768	0.0915289	0.716738	0.0915927	0.704617	0.0944021	0.729523	0.0927389	0.723079	0.0940356	0.745209	0.0944861	0.7501	0.0960576	0.751954	0.0948842	0.72156	0.0962017	0.727088	0.0980471
ConcSwap	FALSE	0.781	0.0937	0.560304	0.0725872			0.413799	0.0574901	0.586366	0.0760276	0.573115	0.0800076	0.577911	0.0797562	0.604973	0.079351	0.593101	0.0814366	0.659121	0.0889879	0.669316	0.0874103	0.677116	0.0885622	0.689725	0.0892428	0.713127	0.0918524	0.714354	0.0914362	0.726552	0.0913743	0.700351	0.0937256	0.74093	0.0924649	0.719134	0.0934481	0.742685	0.0941047	0.747493	0.0956818	0.749281	0.0944049	0.717927	0.0957929	0.723139	0.0974402
1st Symbol-row	1	0.779	0.0939	0.581644	0.0748847			0.419372	0.0574314	0.59428	0.0758942	0.572045	0.0794987	0.576821	0.0792552	0.612301	0.079168	0.592045	0.0810134	0.657926	0.0884387	0.66803	0.0868314	0.675926	0.0880921	0.688478	0.0887143	0.711926	0.0914697	0.726665	0.091462	0.739156	0.0912877	0.698911	0.0930347	0.755584	0.0922911	0.717806	0.0928803	0.741836	0.0937406	0.746612	0.095298	0.748388	0.0939866	0.716702	0.0953975	0.721806	0.0968271
		0.781	0.0945	0.603276	0.077187			0.425725	0.0574916	0.603305	0.0758569	0.573115	0.0789898	0.577925	0.0787867	0.620658	0.0791091	0.593129	0.0806683	0.659138	0.0879272	0.669365	0.0863778	0.677143	0.0876966	0.689745	0.0882376	0.713131	0.0911014	0.740704	0.0916043	0.75353	0.0913397	0.700359	0.0923599	0.772296	0.0922314	0.719153	0.0923571	0.742699	0.0934097	0.747497	0.094923	0.749314	0.0936476	0.717937	0.0950328	0.723148	0.0962347
		0.787	0.0955	0.625203	0.0794943			0.432344	0.0576659	0.612711	0.0759186	0.576277	0.0785032	0.581173	0.0783712	0.629367	0.079179	0.596305	0.0804164	0.662703	0.0874756	0.673263	0.0860694	0.680713	0.0873931	0.693471	0.0878336	0.716692	0.0907637	0.755335	0.0918516	0.768509	0.0915263	0.704632	0.0917305	0.789714	0.0922906	0.723115	0.0919013	0.745235	0.0931265	0.750108	0.0945733	0.752018	0.0934026	0.721578	0.0947148	0.727106	0.0956889
		0.79	0.0958	0.647431	0.0818065			0.438692	0.0579402	0.621734	0.0760745	0.581395	0.0780602	0.586425	0.0780269	0.637722	0.0793722	0.601434	0.0802686	0.668467	0.0871037	0.679553	0.0859197	0.686482	0.0871948	0.699493	0.0875198	0.72245	0.0904713	0.769372	0.0921839	0.78288	0.0918323	0.711543	0.0911741	0.806425	0.092464	0.729519	0.0915328	0.749335	0.0929032	0.754331	0.0942641	0.756382	0.0932624	0.727467	0.0944573	0.733506	0.0952134
		0.773	0.0961	0.669963	0.0841237			0.444254	0.0582922	0.629646	0.0763118	0.588243	0.0776801	0.59345	0.0777688	0.645046	0.079673	0.608293	0.0802315	0.676178	0.0868279	0.687961	0.0859353	0.694196	0.0871103	0.707547	0.0873101	0.730156	0.090237	0.781677	0.0925741	0.795478	0.0922328	0.720791	0.090715	0.821077	0.0927376	0.738086	0.0912679	0.754818	0.0927498	0.759982	0.0940088	0.762215	0.0932331	0.735346	0.0942716	0.74207	0.0948292
		0.783	0.0973	0.692802	0.0864458			0.448581	0.0586935	0.635803	0.0766113	0.596523	0.0773795	0.601941	0.0776083	0.650747	0.0800569	0.616581	0.0803066	0.685497	0.0866601	0.698118	0.0861153	0.703519	0.0871434	0.717282	0.0872136	0.739472	0.0900709	0.791254	0.0929908	0.805283	0.0926955	0.731971	0.0903732	0.832482	0.0930891	0.748441	0.0911179	0.761446	0.0926728	0.766814	0.0938188	0.769263	0.093316	0.744871	0.0941658	0.752423	0.094553
		0.797	0.09761	0.715954	0.0887729			0.451322	0.0591115	0.639708	0.0769488	0.605872	0.0771717	0.611527	0.0775523	0.654361	0.080493	0.625936	0.0804907	0.696019	0.0866077	0.709581	0.086452	0.714043	0.0872926	0.728272	0.0872345	0.749991	0.0899805	0.797326	0.0934001	0.8115	0.0931829	0.744595	0.0901637	0.839716	0.0934902	0.760132	0.0910896	0.768928	0.0926758	0.774528	0.0937022	0.777217	0.0935075	0.755625	0.0941445	0.764111	0.0943968
		0.82	0.098	0.739423	0.091105			0.452254	0.0595124	0.641045	0.077297	0.615883	0.0770655	0.621789	0.0776032	0.655597	0.0809458	0.63595	0.0807757	0.707283	0.0866729	0.72185	0.0869307	0.725307	0.0875514	0.740037	0.0873719	0.761254	0.0899695	0.799403	0.0937689	0.813627	0.0936555	0.75811	0.0900956	0.842194	0.0939082	0.772647	0.0911841	0.776938	0.0927584	0.782787	0.0936642	0.785729	0.0937991	0.767138	0.0942087	0.776626	0.0943675
		0.825	0.0984	0.763213	0.0934421			Black	Black	Black	Black	0.626117	0.0770658	0.63228	0.077759	Black	Black	0.646184	0.0811492	0.718797	0.0868529	0.734387	0.0875304	0.736821	0.0879084	0.752062	0.0876198	0.772768	0.0900386	Black	Black	Black	Black	0.771926	0.090172	Black	Black	0.78544	0.0913972	0.785126	0.0929171	0.791231	0.0937065	0.794429	0.0941782	0.778907	0.0943556	0.789419	0.0944663
		0.794	0.0987	0.787328	0.0957842							0.636128	0.0771725	0.642539	0.0780126			0.656192	0.0815949	0.730057	0.08714	0.746645	0.0882249	0.74808	0.0883481	0.763823	0.0879673	0.784029	0.0901846					0.78544	0.0903894			0.797951	0.0917198	0.793133	0.0931451	0.799489	0.0938271	0.802934	0.0946282	0.790419	0.0945787	0.801931	0.094689
		0.822	0.0996	0.811773	0.0981313							0.645478	0.0773808	0.652119	0.0783531			0.665536	0.0820932	0.740572	0.0875214	0.758088	0.0889839	0.758593	0.0888513	0.774804	0.0883993	0.794547	0.0904013					0.79806	0.0907384			0.809635	0.0921377	0.80061	0.0934322	0.807202	0.0940208	0.810875	0.0951294	0.801169	0.0948683	0.813616	0.0950259
		0.823	0.1012	0.836552	0.100483							0.653757	0.0776818	0.660602	0.0787656			0.673807	0.0826224	0.749882	0.0879805	0.768216	0.0897742	0.7679	0.0893959	0.784527	0.0888969	0.80386	0.090679					0.809236	0.0912038			0.819979	0.0926325	0.80723	0.093766	0.814032	0.0942792	0.817903	0.0956599	0.810688	0.0952117	0.823963	0.0954621
		0.833	0.1014	0.861671	0.102841							0.660605	0.0780623	0.667616	0.079232			0.680645	0.0831594	0.757579	0.0884973	0.776586	0.0905612	0.775594	0.0899582	0.792566	0.0894383	0.811562	0.0910058					0.818478	0.0917651			0.828532	0.0931828	0.812703	0.0941319	0.81968	0.0945909	0.823711	0.0961965	0.81856	0.0955939	0.83252	0.0959786
		0.87	0.1016	0.887132	0.105203							0.665723	0.0785056	0.672855	0.079732			0.68575	0.0836806	0.763329	0.0890492	0.782833	0.0913106	0.781339	0.0905136	0.798569	0.0899999	0.817317	0.0913673					0.825383	0.0923979			0.834921	0.0937644	0.816791	0.0945139	0.8239	0.0949424	0.828046	0.0967158	0.82444	0.0959983	0.838912	0.0965529
		0.835	0.1018	0.912942	0.10757							0.668885	0.0789924	0.676089	0.0802438			0.688899	0.0841634	0.766879	0.0896121	0.786684	0.0919897	0.784884	0.0910378	0.802275	0.0905572	0.820873	0.0917476					0.829649	0.0930744			0.838866	0.0943519	0.819315	0.0948953	0.826507	0.0953182	0.830719	0.0971951	0.828073	0.0964071	0.842861	0.0971598
		0.871	0.102	0.939105	0.109942							0.669955	0.0795013	0.677179	0.0807448			0.689955	0.0845866	0.768074	0.0901613	0.78797	0.0925686	0.786074	0.0915079	0.803522	0.0910857	0.822074	0.0921303					0.831089	0.0937653			0.840194	0.0949197	0.820164	0.0952594	0.827388	0.095702	0.831612	0.0976134	0.829298	0.0968025	0.844194	0.0977729
		0.857	0.1027	0.965626	0.11232							Black	Black	Black	Black			Black	Black	Black	Black	Black	Black	Black	Black	Black	Black	Black	Black					Black	Black			Black	Black	Black	Black	Black	Black	Black	Black	Black	Black	Black	Black
		0.894	0.1031	0.99251	0.114702
		0.862	0.1039	1	0.115359
		0.894	0.1046	IsoLine	IsoLine
		0.885	0.1052
		0.888	0.1054
		0.896	0.1056
		0.892	0.1059
		0.913	0.1062
		0.888	0.1068
		0.886	0.107
		0.923	0.1088
		0.959	0.1095
		1.111	0.1244
		1.304	0.1394
		1.71	0.1703
		1.666	0.1673
		1.785	0.177
		1.753	0.1732
		3.368	0.2622
		4.449	0.3059
		4.45	0.3048
		4.581	0.3101
		4.906	0.3323
		4.56	0.3085
		5.24	0.3401
		5.07	0.3157
		5.46	0.342
		5.46	0.3465
		5.276	0.3274
		5.19	0.3163
		5.938	0.3505
		6.01	0.3561
		5.988	0.3452
		5.89	0.3476
		6.25	0.366
		6.34	0.3709
		6.523	0.3745
		6.024	0.3476
		6.603	0.3785
		6.758	0.3885
		6.657	0.3722
		6.346	0.351
		7.3	0.4035
		7.28	0.3872
		7.78	0.4173
		7.15	0.3732
		7.64	0.3983
		10.6	0.4561
		13.76	0.5331
		14.84	0.555
		12.95	0.4904
		IsoLine	IsoLine
[truncated: 152 more columns]

## Sheet: PlotDat12
Source sheet	Preparation	0.713	0.0893	0.68681	0.0856906	0.703532	0.087376	0.72042	0.0890642	0.737476	0.0907549	0.754701	0.0924482	0.772097	0.0941442	0.678551	0.085	0.68006	0.085	0.677051	0.085	0.685345	0.0856906	0.768074	0.0901613	0.78797	0.0925686	0.786074	0.0915079	0.803522	0.0910857	0.822074	0.0921303	0.770444	0.0911462
Plot name	Concordia5	0.728	0.0897	0.68675	0.0857235	0.703471	0.0874097	0.720358	0.0890984	0.737412	0.0907898	0.754635	0.0924839	0.772028	0.0941805	0.678551	0.085	0.681926	0.0851895	0.678551	0.0851532	0.702025	0.087376	0.767836	0.090393	0.787703	0.0927855	0.785833	0.0916927	0.803272	0.0913037	0.821537	0.0923784	0.770155	0.0913101
Plot Type	1	0.731	0.0898	0.686577	0.0857538	0.703293	0.0874405	0.720174	0.0891299	0.737223	0.090822	0.754441	0.0925166	0.771829	0.0942139	0.681926	0.0853433	0.685307	0.0855323	0.681926	0.0854971	0.718871	0.0890642	0.767129	0.0906154	0.786927	0.092976	0.785125	0.0918613	0.802533	0.0915097	0.819938	0.0926153	0.7693	0.0914582
1st free col	37	0.746	0.0899	0.686304	0.0857789	0.703012	0.0874662	0.719886	0.0891561	0.736926	0.0908486	0.754136	0.0925438	0.771516	0.0942416	0.685307	0.0856867	0.688696	0.0858751	0.685307	0.0858412	0.735883	0.0907549	0.765961	0.0908265	0.785648	0.0931386	0.783954	0.0920123	0.801313	0.091702	0.817308	0.0928363	0.767897	0.0915876
Sigma Level	2	0.767	0.0918	0.685954	0.0857969	0.702651	0.0874846	0.719514	0.0891748	0.736545	0.0908677	0.753743	0.0925633	0.771113	0.0942615	0.688696	0.0860302	0.692091	0.0862181	0.688696	0.0861853	0.753063	0.0924482	0.764341	0.0910247	0.783877	0.0932719	0.782332	0.0921445	0.79962	0.0918789	0.8137	0.0930371	0.765972	0.0916958
Absolute Errs	TRUE	IsoLine	IsoLine	0.685554	0.0858063	0.70224	0.0874941	0.719091	0.0891846	0.736109	0.0908777	0.753296	0.0925734	0.770653	0.0942718	0.692091	0.0863739	0.695493	0.0865612	0.692091	0.0865296	0.770413	0.0941442	0.762283	0.0912081	0.78163	0.0933747	0.780272	0.0922567	0.797469	0.0920389	0.809182	0.0932138	0.763563	0.0917806
Symbol Type	1			0.685137	0.0858063	0.701811	0.0874941	0.71865	0.0891846	0.735656	0.0908777	0.75283	0.0925734	0.770174	0.0942718	0.695493	0.0867176	0.698902	0.0869044	0.695493	0.086874	IsoLine	IsoLine	0.759804	0.0913752	0.778925	0.0934461	0.777791	0.0923479	0.79488	0.0921807	0.803844	0.093363	0.760717	0.0918405
Inverse Plot	FALSE			0.684737	0.0857969	0.7014	0.0874846	0.718227	0.0891748	0.735221	0.0908677	0.752382	0.0925633	0.769714	0.0942615	0.698902	0.0870614	0.702317	0.0872477	0.698902	0.0872185			0.756926	0.0915247	0.775785	0.0934856	0.774911	0.0924173	0.791874	0.092303	0.797788	0.0934818	0.757489	0.0918742
Color Plot	FALSE			0.684386	0.0857789	0.701039	0.0874662	0.717856	0.0891561	0.734839	0.0908486	0.75199	0.0925438	0.769311	0.0942416	0.702317	0.0874054	0.70574	0.0875911	0.702317	0.0875631			0.753674	0.0916551	0.772238	0.0934928	0.771657	0.0924645	0.788476	0.0924048	0.791133	0.0935679	0.753942	0.0918811
3D plot	FALSE			0.684114	0.0857538	0.700758	0.0874405	0.717567	0.0891299	0.734542	0.090822	0.751685	0.0925166	0.768997	0.0942139	0.70574	0.0877495	0.709169	0.0879347	0.70574	0.0879078			0.750074	0.0917655	0.768314	0.0934676	0.768056	0.0924889	0.784716	0.0924853	0.784009	0.0936195	0.750146	0.0918611
Linear	FALSE			0.68394	0.0857235	0.70058	0.0874097	0.717384	0.0890984	0.734354	0.0907898	0.751491	0.0924839	0.768798	0.0941805	0.709169	0.0880936	0.712605	0.0882783	0.709169	0.0882526			0.746158	0.0918548	0.764045	0.0934102	0.764138	0.0924903	0.780625	0.0925437	0.776553	0.0936358	0.746173	0.0918145
Data Range	L38:P42			0.683881	0.0856906	0.700519	0.087376	0.717321	0.0890642	0.734289	0.0907549	0.751425	0.0924482	0.76873	0.0941442	0.712605	0.0884379	0.716049	0.088622	0.712605	0.0885975			0.741959	0.0919224	0.759469	0.0933213	0.759938	0.0924688	0.776239	0.0925795	0.768911	0.0936163	0.742102	0.0917422
Filled Symbols	FALSE			0.68394	0.0856576	0.70058	0.0873424	0.717384	0.0890299	0.734354	0.0907199	0.751491	0.0924126	0.768798	0.0941079	0.716049	0.0887823	0.719499	0.0889659	0.716049	0.0889426			0.737513	0.0919675	0.754624	0.0932014	0.755491	0.0924246	0.771595	0.0925925	0.761232	0.0935614	0.738011	0.0916458
ConcAge	TRUE			0.684114	0.0856274	0.700758	0.0873116	0.717567	0.0889984	0.734542	0.0906878	0.751685	0.0923798	0.768997	0.0940745	0.719499	0.0891268	0.722956	0.0893099	0.719499	0.0892877			0.732858	0.0919899	0.749553	0.0930516	0.750835	0.0923579	0.766733	0.0925825	0.753666	0.0934723	0.733981	0.091527
ConcSwap	FALSE			0.684386	0.0856022	0.701039	0.0872859	0.717856	0.0889722	0.734839	0.0906611	0.75199	0.0923526	0.769311	0.0940468	0.722956	0.0894714	0.72642	0.0896539	0.722956	0.089633			0.728033	0.0919894	0.744297	0.0928733	0.74601	0.0922694	0.761694	0.0925496	0.746359	0.0933506	0.730089	0.0913881
1st Symbol-row	1			0.684737	0.0855842	0.7014	0.0872675	0.718227	0.0889535	0.735221	0.090642	0.752382	0.0923332	0.769714	0.0940269	0.72642	0.0898161	0.729891	0.0899981	0.72642	0.0899783			0.723081	0.0919659	0.738903	0.0926679	0.741056	0.0921599	0.756521	0.0924941	0.739453	0.0931987	0.726412	0.0912319
				0.685137	0.0855749	0.701811	0.087258	0.71865	0.0889437	0.735656	0.0906321	0.75283	0.092323	0.770174	0.0940166	0.729891	0.090161	0.733369	0.0903424	0.729891	0.0903238			0.718042	0.0919196	0.733415	0.0924372	0.736017	0.0920302	0.751258	0.0924165	0.733084	0.0930197	0.723021	0.0910614
				0.685554	0.0855749	0.70224	0.087258	0.719091	0.0889437	0.736109	0.0906321	0.753296	0.092323	0.770653	0.0940166	0.733369	0.0905059	0.736853	0.0906868	0.733369	0.0906694			0.71296	0.0918511	0.727881	0.0921831	0.730935	0.0918815	0.74595	0.0923174	0.727375	0.0928168	0.719982	0.0908799
				0.685954	0.0855842	0.702651	0.0872675	0.719514	0.0889535	0.736545	0.090642	0.753743	0.0923332	0.771113	0.0940269	0.736853	0.0908509	0.740345	0.0910313	0.736853	0.0910151			0.707879	0.0917607	0.722348	0.0919078	0.725854	0.0917151	0.740643	0.0921977	0.722438	0.0925942	0.717353	0.0906909
				0.686304	0.0856022	0.703012	0.0872859	0.719886	0.0889722	0.736926	0.0906611	0.754136	0.0923526	0.771516	0.0940468	0.740345	0.0911961	0.743844	0.0913759	0.740345	0.0913609			0.702841	0.0916494	0.716864	0.0916137	0.720817	0.0915322	0.735381	0.0920584	0.718367	0.0923561	0.715188	0.0904982
				0.686577	0.0856274	0.703293	0.0873116	0.720174	0.0889984	0.737223	0.0906878	0.754441	0.0923798	0.771829	0.0940745	0.743844	0.0915414	0.74735	0.0917206	0.743844	0.0917068			0.69789	0.091518	0.711474	0.0913032	0.715866	0.0913347	0.73021	0.0919006	0.715243	0.0921072	0.713526	0.0903055
				0.68675	0.0856576	0.703471	0.0873424	0.720358	0.0890299	0.737412	0.0907199	0.754635	0.0924126	0.772028	0.0941079	0.74735	0.0918867	0.750863	0.0920655	0.74735	0.0920528			0.693068	0.0913677	0.706226	0.0909791	0.711045	0.091124	0.725174	0.0917258	0.713127	0.0918524	0.712402	0.0901164
				0.68681	0.0856906	0.703532	0.087376	0.72042	0.0890642	0.737476	0.0907549	0.754701	0.0924482	0.772097	0.0941442	0.750863	0.0922322	0.754384	0.0924104	0.750863	0.092399			0.688416	0.0911997	0.701163	0.0906441	0.706394	0.090902	0.720316	0.0915354	0.712059	0.0915965	0.711836	0.0899348
				ConcTikEll	ConcTikEll	ConcTikEll	ConcTikEll	ConcTikEll	ConcTikEll	ConcTikEll	ConcTikEll	ConcTikEll	ConcTikEll	ConcTikEll	ConcTikEll	0.754384	0.0925778	0.757911	0.0927555	0.754384	0.0927452			0.683973	0.0910155	0.696329	0.090301	0.701952	0.0906706	0.715676	0.0913311	0.712061	0.0913445	0.711839	0.0897642
																0.757911	0.0929235	0.761445	0.0931006	0.757911	0.0930916			0.679778	0.0908168	0.691765	0.0899528	0.697759	0.0904318	0.711295	0.0911146	0.713131	0.0911014	0.712413	0.0896078
																0.761445	0.0932693	0.764986	0.0934459	0.761445	0.093438			0.675867	0.090605	0.687511	0.0896024	0.693849	0.0901876	0.707211	0.0908877	0.715251	0.090872	0.713545	0.0894687
																0.764986	0.0936152	0.768535	0.0937913	0.764986	0.0937846			0.672273	0.0903821	0.683602	0.0892529	0.690256	0.0899401	0.703457	0.0906523	0.718377	0.0906605	0.715213	0.0893496
																0.768535	0.0939613	0.77209	0.0941367	0.768535	0.0941313			0.669026	0.09015	0.680072	0.0889072	0.687011	0.0896915	0.700066	0.0904106	0.72245	0.0904713	0.717385	0.0892529
																0.77209	0.0943074	0.775653	0.0944823	0.77209	0.0944781			0.666154	0.0899107	0.67695	0.0885682	0.684141	0.0894437	0.697068	0.0901645	0.72739	0.0903079	0.720019	0.0891804
																0.775653	0.0946536	0.779223	0.094828	0.775653	0.094825			0.663682	0.0896661	0.674264	0.0882389	0.681671	0.089199	0.694486	0.0899161	0.733101	0.0901736	0.723064	0.0891335
																0.779223	0.095	0.781002	0.095	0.777454	0.095			0.66163	0.0894184	0.672037	0.0879221	0.679621	0.0889594	0.692344	0.0896676	0.739472	0.0900709	0.726459	0.0891131
																0.779223	0.095	ConcBand	ConcBand	ConcBand	ConcBand			0.660017	0.0891697	0.670287	0.0876204	0.67801	0.0887269	0.69066	0.0894211	0.746379	0.0900019	0.73014	0.0891197
																IsoLine	IsoLine							0.658856	0.0889221	0.66903	0.0873365	0.676852	0.0885036	0.689448	0.0891787	0.753687	0.0899679	0.734034	0.0891531
																								0.658157	0.0886778	0.668275	0.0870727	0.676155	0.0882914	0.688719	0.0889424	0.761254	0.0899695	0.738065	0.0892126
																								0.657926	0.0884387	0.66803	0.0868314	0.675926	0.0880921	0.688478	0.0887143	0.768933	0.0900068	0.742156	0.0892972
																								0.658164	0.088207	0.668297	0.0866145	0.676167	0.0879073	0.688728	0.0884963	0.776574	0.0900789	0.746226	0.0894051
																								0.658871	0.0879846	0.669073	0.086424	0.676875	0.0877387	0.689467	0.0882903	0.784029	0.0901846	0.750197	0.0895343
																								0.660039	0.0877735	0.670352	0.0862614	0.678046	0.0875877	0.690687	0.088098	0.791153	0.0903217	0.753991	0.0896822
																								0.661659	0.0875753	0.672123	0.0861281	0.679668	0.0874555	0.69238	0.0879211	0.797806	0.0904876	0.757534	0.0898459
																								0.663717	0.0873919	0.67437	0.0860253	0.681728	0.0873433	0.694531	0.0877611	0.80386	0.090679	0.760757	0.0900224
																								0.666196	0.0872248	0.677075	0.0859539	0.684209	0.0872521	0.69712	0.0876193	0.809196	0.0908923	0.763598	0.090208
																								0.669074	0.0870753	0.680215	0.0859144	0.687089	0.0871827	0.700126	0.087497	0.813711	0.0911232	0.766	0.0903993
																								0.672326	0.0869449	0.683762	0.0859072	0.690343	0.0871355	0.703524	0.0873952	0.817317	0.0913673	0.767919	0.0905925
																								0.675926	0.0868345	0.687686	0.0859324	0.693944	0.0871111	0.707284	0.0873147	0.819944	0.0916198	0.769315	0.0907839
																								0.679842	0.0867452	0.691955	0.0859898	0.697862	0.0871097	0.711375	0.0872563	0.82154	0.0918758	0.770162	0.0909696
																								0.684041	0.0866776	0.696531	0.0860787	0.702062	0.0871312	0.715761	0.0872205	0.822074	0.0921303	0.770444	0.0911462
																								0.688487	0.0866325	0.701376	0.0861986	0.706509	0.0871754	0.720405	0.0872075	Black	Black
																								0.693142	0.0866101	0.706447	0.0863484	0.711165	0.0872421	0.725267	0.0872175
																								0.697967	0.0866106	0.711703	0.0865267	0.71599	0.0873306	0.730306	0.0872504
																								0.702919	0.0866341	0.717097	0.0867321	0.720944	0.0874401	0.735479	0.0873059
																								0.707958	0.0866804	0.722585	0.0869628	0.725983	0.0875698	0.740742	0.0873835
																								0.71304	0.0867489	0.728119	0.0872169	0.731065	0.0877185	0.74605	0.0874826
																								0.718121	0.0868393	0.733652	0.0874922	0.736146	0.0878849	0.751357	0.0876023
																								0.723159	0.0869506	0.739136	0.0877863	0.741183	0.0880678	0.756619	0.0877416
																								0.72811	0.087082	0.744526	0.0880968	0.746134	0.0882653	0.76179	0.0878994
																								0.732932	0.0872323	0.749774	0.0884209	0.750955	0.088476	0.766826	0.0880742
																								0.737584	0.0874003	0.754837	0.0887559	0.755606	0.088698	0.771684	0.0882646
																								0.742027	0.0875845	0.759671	0.089099	0.760048	0.0889294	0.776324	0.0884689
																								0.746222	0.0877832	0.764235	0.0894472	0.764241	0.0891682	0.780705	0.0886854
																								0.750133	0.087995	0.768489	0.0897976	0.768151	0.0894124	0.784789	0.0889123
																								0.753727	0.0882179	0.772398	0.0901471	0.771744	0.0896599	0.788543	0.0891477
																								0.756974	0.08845	0.775928	0.0904928	0.774989	0.0899085	0.791934	0.0893894
																								0.759846	0.0886893	0.77905	0.0908318	0.777859	0.0901563	0.794932	0.0896355
																								0.762318	0.0889339	0.781736	0.0911611	0.780329	0.090401	0.797514	0.0898839
																								0.76437	0.0891816	0.783963	0.0914779	0.782379	0.0906406	0.799656	0.0901324
																								0.765983	0.0894303	0.785713	0.0917796	0.78399	0.0908731	0.80134	0.0903789
																								0.767144	0.0896779	0.78697	0.0920635	0.785148	0.0910964	0.802552	0.0906213
																								0.767843	0.0899222	0.787725	0.0923273	0.785845	0.0913086	0.803281	0.0908576
																								0.768074	0.0901613	0.78797	0.0925686	0.786074	0.0915079	0.803522	0.0910857
																								Black	Black	Black	Black	Black	Black	Black	Black

## Sheet: PlotDat13
Source sheet	Preparation	0.713	0.0893	0.68681	0.0856906	0.703532	0.087376	0.72042	0.0890642	0.737476	0.0907549	0.754701	0.0924482	0.772097	0.0941442	0.678551	0.085	0.68006	0.085	0.677051	0.085	0.685345	0.0856906	0.768074	0.0901613	0.78797	0.0925686	0.786074	0.0915079	0.803522	0.0910857	0.762523	0.0906282
Plot name	Concordia6	0.728	0.0897	0.68675	0.0857235	0.703471	0.0874097	0.720358	0.0890984	0.737412	0.0907898	0.754635	0.0924839	0.772028	0.0941805	0.678551	0.085	0.681926	0.0851895	0.678551	0.0851532	0.702025	0.087376	0.767836	0.090393	0.787703	0.0927855	0.785833	0.0916927	0.803272	0.0913037	0.762188	0.090822
Plot Type	1	0.731	0.0898	0.686577	0.0857538	0.703293	0.0874405	0.720174	0.0891299	0.737223	0.090822	0.754441	0.0925166	0.771829	0.0942139	0.681926	0.0853433	0.685307	0.0855323	0.681926	0.0854971	0.718871	0.0890642	0.767129	0.0906154	0.786927	0.092976	0.785125	0.0918613	0.802533	0.0915097	0.7612	0.0909929
1st free col	35	0.746	0.0899	0.686304	0.0857789	0.703012	0.0874662	0.719886	0.0891561	0.736926	0.0908486	0.754136	0.0925438	0.771516	0.0942416	0.685307	0.0856867	0.688696	0.0858751	0.685307	0.0858412	0.735883	0.0907549	0.765961	0.0908265	0.785648	0.0931386	0.783954	0.0920123	0.801313	0.091702	0.759579	0.0911376
Sigma Level	2	IsoLine	IsoLine	0.685954	0.0857969	0.702651	0.0874846	0.719514	0.0891748	0.736545	0.0908677	0.753743	0.0925633	0.771113	0.0942615	0.688696	0.0860302	0.692091	0.0862181	0.688696	0.0861853	0.753063	0.0924482	0.764341	0.0910247	0.783877	0.0932719	0.782332	0.0921445	0.79962	0.0918789	0.757356	0.0912533
Absolute Errs	TRUE			0.685554	0.0858063	0.70224	0.0874941	0.719091	0.0891846	0.736109	0.0908777	0.753296	0.0925734	0.770653	0.0942718	0.692091	0.0863739	0.695493	0.0865612	0.692091	0.0865296	0.770413	0.0941442	0.762283	0.0912081	0.78163	0.0933747	0.780272	0.0922567	0.797469	0.0920389	0.754576	0.0913376
Symbol Type	1			0.685137	0.0858063	0.701811	0.0874941	0.71865	0.0891846	0.735656	0.0908777	0.75283	0.0925734	0.770174	0.0942718	0.695493	0.0867176	0.698902	0.0869044	0.695493	0.086874	IsoLine	IsoLine	0.759804	0.0913752	0.778925	0.0934461	0.777791	0.0923479	0.79488	0.0921807	0.75129	0.091389
Inverse Plot	FALSE			0.684737	0.0857969	0.7014	0.0874846	0.718227	0.0891748	0.735221	0.0908677	0.752382	0.0925633	0.769714	0.0942615	0.698902	0.0870614	0.702317	0.0872477	0.698902	0.0872185			0.756926	0.0915247	0.775785	0.0934856	0.774911	0.0924173	0.791874	0.092303	0.747565	0.0914065
Color Plot	FALSE			0.684386	0.0857789	0.701039	0.0874662	0.717856	0.0891561	0.734839	0.0908486	0.75199	0.0925438	0.769311	0.0942416	0.702317	0.0874054	0.70574	0.0875911	0.702317	0.0875631			0.753674	0.0916551	0.772238	0.0934928	0.771657	0.0924645	0.788476	0.0924048	0.743472	0.0913897
3D plot	FALSE			0.684114	0.0857538	0.700758	0.0874405	0.717567	0.0891299	0.734542	0.090822	0.751685	0.0925166	0.768997	0.0942139	0.70574	0.0877495	0.709169	0.0879347	0.70574	0.0879078			0.750074	0.0917655	0.768314	0.0934676	0.768056	0.0924889	0.784716	0.0924853	0.73909	0.0913389
Linear	FALSE			0.68394	0.0857235	0.70058	0.0874097	0.717384	0.0890984	0.734354	0.0907898	0.751491	0.0924839	0.768798	0.0941805	0.709169	0.0880936	0.712605	0.0882783	0.709169	0.0882526			0.746158	0.0918548	0.764045	0.0934102	0.764138	0.0924903	0.780625	0.0925437	0.734506	0.0912552
Data Range	L38:P41			0.683881	0.0856906	0.700519	0.087376	0.717321	0.0890642	0.734289	0.0907549	0.751425	0.0924482	0.76873	0.0941442	0.712605	0.0884379	0.716049	0.088622	0.712605	0.0885975			0.741959	0.0919224	0.759469	0.0933213	0.759938	0.0924688	0.776239	0.0925795	0.729809	0.0911401
Filled Symbols	FALSE			0.68394	0.0856576	0.70058	0.0873424	0.717384	0.0890299	0.734354	0.0907199	0.751491	0.0924126	0.768798	0.0941079	0.716049	0.0887823	0.719499	0.0889659	0.716049	0.0889426			0.737513	0.0919675	0.754624	0.0932014	0.755491	0.0924246	0.771595	0.0925925	0.725089	0.090996
ConcAge	TRUE			0.684114	0.0856274	0.700758	0.0873116	0.717567	0.0889984	0.734542	0.0906878	0.751685	0.0923798	0.768997	0.0940745	0.719499	0.0891268	0.722956	0.0893099	0.719499	0.0892877			0.732858	0.0919899	0.749553	0.0930516	0.750835	0.0923579	0.766733	0.0925825	0.720438	0.0908256
ConcSwap	FALSE			0.684386	0.0856022	0.701039	0.0872859	0.717856	0.0889722	0.734839	0.0906611	0.75199	0.0923526	0.769311	0.0940468	0.722956	0.0894714	0.72642	0.0896539	0.722956	0.089633			0.728033	0.0919894	0.744297	0.0928733	0.74601	0.0922694	0.761694	0.0925496	0.715948	0.0906322
1st Symbol-row	1			0.684737	0.0855842	0.7014	0.0872675	0.718227	0.0889535	0.735221	0.090642	0.752382	0.0923332	0.769714	0.0940269	0.72642	0.0898161	0.729891	0.0899981	0.72642	0.0899783			0.723081	0.0919659	0.738903	0.0926679	0.741056	0.0921599	0.756521	0.0924941	0.711706	0.0904196
				0.685137	0.0855749	0.701811	0.087258	0.71865	0.0889437	0.735656	0.0906321	0.75283	0.092323	0.770174	0.0940166	0.729891	0.090161	0.733369	0.0903424	0.729891	0.0903238			0.718042	0.0919196	0.733415	0.0924372	0.736017	0.0920302	0.751258	0.0924165	0.707794	0.0901919
				0.685554	0.0855749	0.70224	0.087258	0.719091	0.0889437	0.736109	0.0906321	0.753296	0.092323	0.770653	0.0940166	0.733369	0.0905059	0.736853	0.0906868	0.733369	0.0906694			0.71296	0.0918511	0.727881	0.0921831	0.730935	0.0918815	0.74595	0.0923174	0.704288	0.0899536
				0.685954	0.0855842	0.702651	0.0872675	0.719514	0.0889535	0.736545	0.090642	0.753743	0.0923332	0.771113	0.0940269	0.736853	0.0908509	0.740345	0.0910313	0.736853	0.0910151			0.707879	0.0917607	0.722348	0.0919078	0.725854	0.0917151	0.740643	0.0921977	0.701256	0.0897093
				0.686304	0.0856022	0.703012	0.0872859	0.719886	0.0889722	0.736926	0.0906611	0.754136	0.0923526	0.771516	0.0940468	0.740345	0.0911961	0.743844	0.0913759	0.740345	0.0913609			0.702841	0.0916494	0.716864	0.0916137	0.720817	0.0915322	0.735381	0.0920584	0.698759	0.0894637
				0.686577	0.0856274	0.703293	0.0873116	0.720174	0.0889984	0.737223	0.0906878	0.754441	0.0923798	0.771829	0.0940745	0.743844	0.0915414	0.74735	0.0917206	0.743844	0.0917068			0.69789	0.091518	0.711474	0.0913032	0.715866	0.0913347	0.73021	0.0919006	0.696843	0.0892217
				0.68675	0.0856576	0.703471	0.0873424	0.720358	0.0890299	0.737412	0.0907199	0.754635	0.0924126	0.772028	0.0941079	0.74735	0.0918867	0.750863	0.0920655	0.74735	0.0920528			0.693068	0.0913677	0.706226	0.0909791	0.711045	0.091124	0.725174	0.0917258	0.695547	0.088988
				0.68681	0.0856906	0.703532	0.087376	0.72042	0.0890642	0.737476	0.0907549	0.754701	0.0924482	0.772097	0.0941442	0.750863	0.0922322	0.754384	0.0924104	0.750863	0.092399			0.688416	0.0911997	0.701163	0.0906441	0.706394	0.090902	0.720316	0.0915354	0.694895	0.088767
				ConcTikEll	ConcTikEll	ConcTikEll	ConcTikEll	ConcTikEll	ConcTikEll	ConcTikEll	ConcTikEll	ConcTikEll	ConcTikEll	ConcTikEll	ConcTikEll	0.754384	0.0925778	0.757911	0.0927555	0.754384	0.0927452			0.683973	0.0910155	0.696329	0.090301	0.701952	0.0906706	0.715676	0.0913311	0.694901	0.0885631
																0.757911	0.0929235	0.761445	0.0931006	0.757911	0.0930916			0.679778	0.0908168	0.691765	0.0899528	0.697759	0.0904318	0.711295	0.0911146	0.695564	0.0883803
																0.761445	0.0932693	0.764986	0.0934459	0.761445	0.093438			0.675867	0.090605	0.687511	0.0896024	0.693849	0.0901876	0.707211	0.0908877	0.696872	0.0882221
																0.764986	0.0936152	0.768535	0.0937913	0.764986	0.0937846			0.672273	0.0903821	0.683602	0.0892529	0.690256	0.0899401	0.703457	0.0906523	0.698798	0.0880917
																0.768535	0.0939613	0.77209	0.0941367	0.768535	0.0941313			0.669026	0.09015	0.680072	0.0889072	0.687011	0.0896915	0.700066	0.0904106	0.701306	0.0879914
																0.77209	0.0943074	0.775653	0.0944823	0.77209	0.0944781			0.666154	0.0899107	0.67695	0.0885682	0.684141	0.0894437	0.697068	0.0901645	0.704347	0.0879234
																0.775653	0.0946536	0.779223	0.094828	0.775653	0.094825			0.663682	0.0896661	0.674264	0.0882389	0.681671	0.089199	0.694486	0.0899161	0.707861	0.0878889
																0.779223	0.095	0.781002	0.095	0.777454	0.095			0.66163	0.0894184	0.672037	0.0879221	0.679621	0.0889594	0.692344	0.0896676	0.711779	0.0878885
																0.779223	0.095	ConcBand	ConcBand	ConcBand	ConcBand			0.660017	0.0891697	0.670287	0.0876204	0.67801	0.0887269	0.69066	0.0894211	0.716027	0.0879224
																IsoLine	IsoLine							0.658856	0.0889221	0.66903	0.0873365	0.676852	0.0885036	0.689448	0.0891787	0.720521	0.0879898
																								0.658157	0.0886778	0.668275	0.0870727	0.676155	0.0882914	0.688719	0.0889424	0.725173	0.0880894
																								0.657926	0.0884387	0.66803	0.0868314	0.675926	0.0880921	0.688478	0.0887143	0.729893	0.0882193
																								0.658164	0.088207	0.668297	0.0866145	0.676167	0.0879073	0.688728	0.0884963	0.73459	0.088377
																								0.658871	0.0879846	0.669073	0.086424	0.676875	0.0877387	0.689467	0.0882903	0.739171	0.0885594
																								0.660039	0.0877735	0.670352	0.0862614	0.678046	0.0875877	0.690687	0.088098	0.743548	0.0887629
																								0.661659	0.0875753	0.672123	0.0861281	0.679668	0.0874555	0.69238	0.0879211	0.747635	0.0889835
																								0.663717	0.0873919	0.67437	0.0860253	0.681728	0.0873433	0.694531	0.0877611	0.751353	0.0892171
																								0.666196	0.0872248	0.677075	0.0859539	0.684209	0.0872521	0.69712	0.0876193	0.75463	0.089459
																								0.669074	0.0870753	0.680215	0.0859144	0.687089	0.0871827	0.700126	0.087497	0.757401	0.0897045
																								0.672326	0.0869449	0.683762	0.0859072	0.690343	0.0871355	0.703524	0.0873952	0.759614	0.0899489
																								0.675926	0.0868345	0.687686	0.0859324	0.693944	0.0871111	0.707284	0.0873147	0.761223	0.0901874
																								0.679842	0.0867452	0.691955	0.0859898	0.697862	0.0871097	0.711375	0.0872563	0.7622	0.0904153
																								0.684041	0.0866776	0.696531	0.0860787	0.702062	0.0871312	0.715761	0.0872205	0.762523	0.0906282
																								0.688487	0.0866325	0.701376	0.0861986	0.706509	0.0871754	0.720405	0.0872075
																								0.693142	0.0866101	0.706447	0.0863484	0.711165	0.0872421	0.725267	0.0872175
																								0.697967	0.0866106	0.711703	0.0865267	0.71599	0.0873306	0.730306	0.0872504
																								0.702919	0.0866341	0.717097	0.0867321	0.720944	0.0874401	0.735479	0.0873059
																								0.707958	0.0866804	0.722585	0.0869628	0.725983	0.0875698	0.740742	0.0873835
																								0.71304	0.0867489	0.728119	0.0872169	0.731065	0.0877185	0.74605	0.0874826
																								0.718121	0.0868393	0.733652	0.0874922	0.736146	0.0878849	0.751357	0.0876023
																								0.723159	0.0869506	0.739136	0.0877863	0.741183	0.0880678	0.756619	0.0877416
																								0.72811	0.087082	0.744526	0.0880968	0.746134	0.0882653	0.76179	0.0878994
																								0.732932	0.0872323	0.749774	0.0884209	0.750955	0.088476	0.766826	0.0880742
																								0.737584	0.0874003	0.754837	0.0887559	0.755606	0.088698	0.771684	0.0882646
																								0.742027	0.0875845	0.759671	0.089099	0.760048	0.0889294	0.776324	0.0884689
																								0.746222	0.0877832	0.764235	0.0894472	0.764241	0.0891682	0.780705	0.0886854
																								0.750133	0.087995	0.768489	0.0897976	0.768151	0.0894124	0.784789	0.0889123
																								0.753727	0.0882179	0.772398	0.0901471	0.771744	0.0896599	0.788543	0.0891477
																								0.756974	0.08845	0.775928	0.0904928	0.774989	0.0899085	0.791934	0.0893894
																								0.759846	0.0886893	0.77905	0.0908318	0.777859	0.0901563	0.794932	0.0896355
																								0.762318	0.0889339	0.781736	0.0911611	0.780329	0.090401	0.797514	0.0898839
																								0.76437	0.0891816	0.783963	0.0914779	0.782379	0.0906406	0.799656	0.0901324
																								0.765983	0.0894303	0.785713	0.0917796	0.78399	0.0908731	0.80134	0.0903789
																								0.767144	0.0896779	0.78697	0.0920635	0.785148	0.0910964	0.802552	0.0906213
																								0.767843	0.0899222	0.787725	0.0923273	0.785845	0.0913086	0.803281	0.0908576
																								0.768074	0.0901613	0.78797	0.0925686	0.786074	0.0915079	0.803522	0.0910857
																								Black	Black	Black	Black	Black	Black	Black	Black

## Sheet: PlotDat14
Source sheet	Preparation	0.713	0.0893	0.68681	0.0856906	0.703532	0.087376	0.72042	0.0890642	0.737476	0.0907549	0.754701	0.0924482	0.772097	0.0941442	0.678551	0.085	0.68006	0.085	0.677051	0.085	0.685345	0.0856906	0.768074	0.0901613	0.78797	0.0925686	0.786074	0.0915079	0.762497	0.090749
Plot name	Concordia7	0.728	0.0897	0.68675	0.0857235	0.703471	0.0874097	0.720358	0.0890984	0.737412	0.0907898	0.754635	0.0924839	0.772028	0.0941805	0.678551	0.085	0.681926	0.0851895	0.678551	0.0851532	0.702025	0.087376	0.767836	0.090393	0.787703	0.0927855	0.785833	0.0916927	0.762112	0.0909701
Plot Type	1	0.731	0.0898	0.686577	0.0857538	0.703293	0.0874405	0.720174	0.0891299	0.737223	0.090822	0.754441	0.0925166	0.771829	0.0942139	0.681926	0.0853433	0.685307	0.0855323	0.681926	0.0854971	0.718871	0.0890642	0.767129	0.0906154	0.786927	0.092976	0.785125	0.0918613	0.76098	0.091163
1st free col	33	IsoLine	IsoLine	0.686304	0.0857789	0.703012	0.0874662	0.719886	0.0891561	0.736926	0.0908486	0.754136	0.0925438	0.771516	0.0942416	0.685307	0.0856867	0.688696	0.0858751	0.685307	0.0858412	0.735883	0.0907549	0.765961	0.0908265	0.785648	0.0931386	0.783954	0.0920123	0.759123	0.0913239
Sigma Level	2			0.685954	0.0857969	0.702651	0.0874846	0.719514	0.0891748	0.736545	0.0908677	0.753743	0.0925633	0.771113	0.0942615	0.688696	0.0860302	0.692091	0.0862181	0.688696	0.0861853	0.753063	0.0924482	0.764341	0.0910247	0.783877	0.0932719	0.782332	0.0921445	0.756576	0.0914497
Absolute Errs	TRUE			0.685554	0.0858063	0.70224	0.0874941	0.719091	0.0891846	0.736109	0.0908777	0.753296	0.0925734	0.770653	0.0942718	0.692091	0.0863739	0.695493	0.0865612	0.692091	0.0865296	0.770413	0.0941442	0.762283	0.0912081	0.78163	0.0933747	0.780272	0.0922567	0.75339	0.091538
Symbol Type	1			0.685137	0.0858063	0.701811	0.0874941	0.71865	0.0891846	0.735656	0.0908777	0.75283	0.0925734	0.770174	0.0942718	0.695493	0.0867176	0.698902	0.0869044	0.695493	0.086874	IsoLine	IsoLine	0.759804	0.0913752	0.778925	0.0934461	0.777791	0.0923479	0.749627	0.0915871
Inverse Plot	FALSE			0.684737	0.0857969	0.7014	0.0874846	0.718227	0.0891748	0.735221	0.0908677	0.752382	0.0925633	0.769714	0.0942615	0.698902	0.0870614	0.702317	0.0872477	0.698902	0.0872185			0.756926	0.0915247	0.775785	0.0934856	0.774911	0.0924173	0.745359	0.0915959
Color Plot	FALSE			0.684386	0.0857789	0.701039	0.0874662	0.717856	0.0891561	0.734839	0.0908486	0.75199	0.0925438	0.769311	0.0942416	0.702317	0.0874054	0.70574	0.0875911	0.702317	0.0875631			0.753674	0.0916551	0.772238	0.0934928	0.771657	0.0924645	0.74067	0.0915643
3D plot	FALSE			0.684114	0.0857538	0.700758	0.0874405	0.717567	0.0891299	0.734542	0.090822	0.751685	0.0925166	0.768997	0.0942139	0.70574	0.0877495	0.709169	0.0879347	0.70574	0.0879078			0.750074	0.0917655	0.768314	0.0934676	0.768056	0.0924889	0.735651	0.091493
Linear	FALSE			0.68394	0.0857235	0.70058	0.0874097	0.717384	0.0890984	0.734354	0.0907898	0.751491	0.0924839	0.768798	0.0941805	0.709169	0.0880936	0.712605	0.0882783	0.709169	0.0882526			0.746158	0.0918548	0.764045	0.0934102	0.764138	0.0924903	0.7304	0.0913832
Data Range	L38:P40			0.683881	0.0856906	0.700519	0.087376	0.717321	0.0890642	0.734289	0.0907549	0.751425	0.0924482	0.76873	0.0941442	0.712605	0.0884379	0.716049	0.088622	0.712605	0.0885975			0.741959	0.0919224	0.759469	0.0933213	0.759938	0.0924688	0.725018	0.0912372
Filled Symbols	FALSE			0.68394	0.0856576	0.70058	0.0873424	0.717384	0.0890299	0.734354	0.0907199	0.751491	0.0924126	0.768798	0.0941079	0.716049	0.0887823	0.719499	0.0889659	0.716049	0.0889426			0.737513	0.0919675	0.754624	0.0932014	0.755491	0.0924246	0.719612	0.0910579
ConcAge	TRUE			0.684114	0.0856274	0.700758	0.0873116	0.717567	0.0889984	0.734542	0.0906878	0.751685	0.0923798	0.768997	0.0940745	0.719499	0.0891268	0.722956	0.0893099	0.719499	0.0892877			0.732858	0.0919899	0.749553	0.0930516	0.750835	0.0923579	0.714285	0.0908486
ConcSwap	FALSE			0.684386	0.0856022	0.701039	0.0872859	0.717856	0.0889722	0.734839	0.0906611	0.75199	0.0923526	0.769311	0.0940468	0.722956	0.0894714	0.72642	0.0896539	0.722956	0.089633			0.728033	0.0919894	0.744297	0.0928733	0.74601	0.0922694	0.709142	0.0906134
1st Symbol-row	1			0.684737	0.0855842	0.7014	0.0872675	0.718227	0.0889535	0.735221	0.090642	0.752382	0.0923332	0.769714	0.0940269	0.72642	0.0898161	0.729891	0.0899981	0.72642	0.0899783			0.723081	0.0919659	0.738903	0.0926679	0.741056	0.0921599	0.704283	0.090357
				0.685137	0.0855749	0.701811	0.087258	0.71865	0.0889437	0.735656	0.0906321	0.75283	0.092323	0.770174	0.0940166	0.729891	0.090161	0.733369	0.0903424	0.729891	0.0903238			0.718042	0.0919196	0.733415	0.0924372	0.736017	0.0920302	0.699801	0.0900844
				0.685554	0.0855749	0.70224	0.087258	0.719091	0.0889437	0.736109	0.0906321	0.753296	0.092323	0.770653	0.0940166	0.733369	0.0905059	0.736853	0.0906868	0.733369	0.0906694			0.71296	0.0918511	0.727881	0.0921831	0.730935	0.0918815	0.695786	0.0898007
				0.685954	0.0855842	0.702651	0.0872675	0.719514	0.0889535	0.736545	0.090642	0.753743	0.0923332	0.771113	0.0940269	0.736853	0.0908509	0.740345	0.0910313	0.736853	0.0910151			0.707879	0.0917607	0.722348	0.0919078	0.725854	0.0917151	0.692314	0.0895116
				0.686304	0.0856022	0.703012	0.0872859	0.719886	0.0889722	0.736926	0.0906611	0.754136	0.0923526	0.771516	0.0940468	0.740345	0.0911961	0.743844	0.0913759	0.740345	0.0913609			0.702841	0.0916494	0.716864	0.0916137	0.720817	0.0915322	0.689453	0.0892227
				0.686577	0.0856274	0.703293	0.0873116	0.720174	0.0889984	0.737223	0.0906878	0.754441	0.0923798	0.771829	0.0940745	0.743844	0.0915414	0.74735	0.0917206	0.743844	0.0917068			0.69789	0.091518	0.711474	0.0913032	0.715866	0.0913347	0.687259	0.0889396
				0.68675	0.0856576	0.703471	0.0873424	0.720358	0.0890299	0.737412	0.0907199	0.754635	0.0924126	0.772028	0.0941079	0.74735	0.0918867	0.750863	0.0920655	0.74735	0.0920528			0.693068	0.0913677	0.706226	0.0909791	0.711045	0.091124	0.685775	0.0886678
				0.68681	0.0856906	0.703532	0.087376	0.72042	0.0890642	0.737476	0.0907549	0.754701	0.0924482	0.772097	0.0941442	0.750863	0.0922322	0.754384	0.0924104	0.750863	0.092399			0.688416	0.0911997	0.701163	0.0906441	0.706394	0.090902	0.68503	0.0884126
				ConcTikEll	ConcTikEll	ConcTikEll	ConcTikEll	ConcTikEll	ConcTikEll	ConcTikEll	ConcTikEll	ConcTikEll	ConcTikEll	ConcTikEll	ConcTikEll	0.754384	0.0925778	0.757911	0.0927555	0.754384	0.0927452			0.683973	0.0910155	0.696329	0.090301	0.701952	0.0906706	0.685037	0.088179
																0.757911	0.0929235	0.761445	0.0931006	0.757911	0.0930916			0.679778	0.0908168	0.691765	0.0899528	0.697759	0.0904318	0.685797	0.0879715
																0.761445	0.0932693	0.764986	0.0934459	0.761445	0.093438			0.675867	0.090605	0.687511	0.0896024	0.693849	0.0901876	0.687296	0.0877942
																0.764986	0.0936152	0.768535	0.0937913	0.764986	0.0937846			0.672273	0.0903821	0.683602	0.0892529	0.690256	0.0899401	0.689503	0.0876505
																0.768535	0.0939613	0.77209	0.0941367	0.768535	0.0941313			0.669026	0.09015	0.680072	0.0889072	0.687011	0.0896915	0.692376	0.0875431
																0.77209	0.0943074	0.775653	0.0944823	0.77209	0.0944781			0.666154	0.0899107	0.67695	0.0885682	0.684141	0.0894437	0.69586	0.0874743
																0.775653	0.0946536	0.779223	0.094828	0.775653	0.094825			0.663682	0.0896661	0.674264	0.0882389	0.681671	0.089199	0.699885	0.0874453
																0.779223	0.095	0.781002	0.095	0.777454	0.095			0.66163	0.0894184	0.672037	0.0879221	0.679621	0.0889594	0.704374	0.0874567
																0.779223	0.095	ConcBand	ConcBand	ConcBand	ConcBand			0.660017	0.0891697	0.670287	0.0876204	0.67801	0.0887269	0.70924	0.0875083
																IsoLine	IsoLine							0.658856	0.0889221	0.66903	0.0873365	0.676852	0.0885036	0.714388	0.0875991
																								0.658157	0.0886778	0.668275	0.0870727	0.676155	0.0882914	0.719717	0.0877272
																								0.657926	0.0884387	0.66803	0.0868314	0.675926	0.0880921	0.725124	0.0878903
																								0.658164	0.088207	0.668297	0.0866145	0.676167	0.0879073	0.730504	0.0880851
																								0.658871	0.0879846	0.669073	0.086424	0.676875	0.0877387	0.735752	0.0883079
																								0.660039	0.0877735	0.670352	0.0862614	0.678046	0.0875877	0.740765	0.0885543
																								0.661659	0.0875753	0.672123	0.0861281	0.679668	0.0874555	0.745447	0.0888194
																								0.663717	0.0873919	0.67437	0.0860253	0.681728	0.0873433	0.749706	0.0890983
																								0.666196	0.0872248	0.677075	0.0859539	0.684209	0.0872521	0.753459	0.0893854
																								0.669074	0.0870753	0.680215	0.0859144	0.687089	0.0871827	0.756633	0.0896751
																								0.672326	0.0869449	0.683762	0.0859072	0.690343	0.0871355	0.759166	0.0899618
																								0.675926	0.0868345	0.687686	0.0859324	0.693944	0.0871111	0.76101	0.0902399
																								0.679842	0.0867452	0.691955	0.0859898	0.697862	0.0871097	0.762127	0.090504
																								0.684041	0.0866776	0.696531	0.0860787	0.702062	0.0871312	0.762497	0.090749
																								0.688487	0.0866325	0.701376	0.0861986	0.706509	0.0871754
																								0.693142	0.0866101	0.706447	0.0863484	0.711165	0.0872421
																								0.697967	0.0866106	0.711703	0.0865267	0.71599	0.0873306
																								0.702919	0.0866341	0.717097	0.0867321	0.720944	0.0874401
																								0.707958	0.0866804	0.722585	0.0869628	0.725983	0.0875698
																								0.71304	0.0867489	0.728119	0.0872169	0.731065	0.0877185
																								0.718121	0.0868393	0.733652	0.0874922	0.736146	0.0878849
																								0.723159	0.0869506	0.739136	0.0877863	0.741183	0.0880678
																								0.72811	0.087082	0.744526	0.0880968	0.746134	0.0882653
																								0.732932	0.0872323	0.749774	0.0884209	0.750955	0.088476
																								0.737584	0.0874003	0.754837	0.0887559	0.755606	0.088698
																								0.742027	0.0875845	0.759671	0.089099	0.760048	0.0889294
																								0.746222	0.0877832	0.764235	0.0894472	0.764241	0.0891682
																								0.750133	0.087995	0.768489	0.0897976	0.768151	0.0894124
																								0.753727	0.0882179	0.772398	0.0901471	0.771744	0.0896599
																								0.756974	0.08845	0.775928	0.0904928	0.774989	0.0899085
																								0.759846	0.0886893	0.77905	0.0908318	0.777859	0.0901563
																								0.762318	0.0889339	0.781736	0.0911611	0.780329	0.090401
																								0.76437	0.0891816	0.783963	0.0914779	0.782379	0.0906406
																								0.765983	0.0894303	0.785713	0.0917796	0.78399	0.0908731
																								0.767144	0.0896779	0.78697	0.0920635	0.785148	0.0910964
																								0.767843	0.0899222	0.787725	0.0923273	0.785845	0.0913086
																								0.768074	0.0901613	0.78797	0.0925686	0.786074	0.0915079
																								Black	Black	Black	Black	Black	Black

[truncated: 6 more sheets: PlotDat4, PlotDat5, PlotDat6, PlotDat7, PlotDat8, PlotDat1]
