# Supplementary material for: A tectonic carpet of Variscan flysch at the base of a rootless accretionary prism in northwestern Iberia: U–Pb zircon age constrains from sediments and volcanic olistoliths
Source: Copernicus journal article supplement (doi:10.5194/se-12-835-2021), 2021-04-15
Supplement: Supplementary file 5 [file se-12-835-2021-supplement.zip › SUPP TABLES/Supplementary Table 8_AD-PO-49.xls]

## Sheet: PlotDat2
Source sheet	all data	0.597361	0.0752599	0	0	0.217708	0.0315113	0.668628	0.0822401	0.749642	0.0917649	0.825165	0.099149	0.85678	0.0998114	0.88169	0.102082	0.881154	0.101962	0.908219	0.104752	0.873775	0.106775	0.945081	0.109493	0.987608	0.107449	0.929159	0.109271	0.967824	0.109969	0.985193	0.111902	0.976635	0.111589	0.981906	0.113186	0.972282	0.113323	1.00235	0.113823	0.983269	0.114175	0.989528	0.113788	0.986339	0.116058	1.0033	0.115386
Plot name	Concordia0	0.668609	0.0838025	0.131529	0.0196543	0.482812	0.0640155	0.665638	0.0830032	0.746244	0.0926127	0.821292	0.100018	0.852727	0.100894	0.876926	0.103699	0.876672	0.103457	0.903759	0.106101	0.870149	0.10736	0.940395	0.110834	0.982054	0.109366	0.924801	0.110541	0.962795	0.111702	0.980842	0.112911	0.97225	0.112722	0.977644	0.114089	0.968202	0.114048	0.997981	0.114672	0.978855	0.115289	0.984697	0.11527	0.982096	0.116862	0.998819	0.116543
Plot Type	1	0.732601	0.0899204	0.280357	0.0396948	0.805631	0.097544	0.657118	0.083139	0.736557	0.0927468	0.810233	0.100068	0.841153	0.101192	0.863294	0.104535	0.863849	0.104208	0.89101	0.10665	0.859778	0.107129	0.927007	0.111299	0.966076	0.110549	0.912359	0.110989	0.948374	0.112669	0.968396	0.113066	0.959714	0.113018	0.965453	0.114124	0.956524	0.113909	0.985473	0.114632	0.966244	0.115537	0.970885	0.115896	0.969959	0.116766	0.986005	0.116837
1st free col	203	0.759877	0.0912115	0.448761	0.0601292	1.19873	0.132129	0.643756	0.0826364	0.721366	0.0921563	0.792885	0.0992965	0.822994	0.100682	0.841897	0.104522	0.843723	0.104153	0.871006	0.106354	0.8435	0.106102	0.906002	0.110851	0.940968	0.110902	0.89284	0.11058	0.925731	0.112792	0.948864	0.112356	0.940042	0.112454	0.946319	0.113288	0.938193	0.112917	0.965837	0.113707	0.946459	0.114898	0.94921	0.115618	0.950911	0.115777	0.9659	0.116245
Sigma Level	2	0.767456	0.0940561	0.639315	0.0809653	1.67741	0.167804	0.626636	0.0815363	0.7019	0.090889	0.770653	0.0977654	0.799722	0.0994042	0.81447	0.103662	0.817924	0.103296	0.845367	0.105236	0.822636	0.104362	0.879082	0.109526	0.908765	0.110398	0.867826	0.109347	0.8967	0.112061	0.923828	0.110838	0.914829	0.111074	0.921795	0.11165	0.914694	0.111152	0.940666	0.111972	0.9211	0.113424	0.92143	0.114456	0.926496	0.113976	0.940131	0.114813
Absolute Errs	FALSE	0.773707	0.0942628	0.854932	0.102211	2.2603	0.204603	0.607144	0.0799276	0.679737	0.0890476	0.745339	0.0955987	0.773222	0.0974629	0.783234	0.102023	0.788543	0.101708	0.81617	0.103388	0.798875	0.102049	0.848427	0.107432	0.872076	0.109077	0.839343	0.107389	0.863632	0.110535	0.895317	0.108635	0.886116	0.108991	0.893865	0.109342	0.887931	0.108758	0.911998	0.109566	0.892224	0.111235	0.889794	0.112505	0.898691	0.111508	0.910787	0.112659
Symbol Type	1	0.801451	0.0962171	1.09891	0.123874	2.97009	0.242562	0.586859	0.0779409	0.656673	0.0867812	0.718992	0.0929719	0.74564	0.0950151	0.75072	0.0997386	0.75796	0.0995167	0.78578	0.100959	0.774142	0.0993508	0.816521	0.104738	0.833872	0.107045	0.809699	0.104866	0.829208	0.108337	0.865639	0.105925	0.85623	0.106374	0.864793	0.106551	0.860073	0.105929	0.882155	0.106686	0.862169	0.108507	0.856865	0.109923	0.869748	0.108574	0.880244	0.109956
Inverse Plot	FALSE	0.78688	0.0972952	1.37498	0.145963	3.83441	0.281716	0.567425	0.0757369	0.634576	0.0842736	0.693748	0.090098	0.719213	0.0922591	0.719562	0.0969939	0.728653	0.0968998	0.75666	0.0981452	0.750441	0.0964861	0.785949	0.101663	0.79725	0.104468	0.781295	0.101981	0.796215	0.105647	0.8372	0.102928	0.827593	0.103434	0.836935	0.103503	0.833375	0.102893	0.853556	0.103564	0.83337	0.105462	0.825311	0.10692	0.842013	0.105411	0.850977	0.106925
Color Plot	TRUE	0.832986	0.100028	1.68735	0.168486	4.8869	0.322105	0.550417	0.0734943	0.615236	0.0817278	0.671651	0.0872097	0.696079	0.0894183	0.692283	0.0940113	0.702996	0.0940692	0.731169	0.0951757	0.729692	0.093687	0.759188	0.0984548	0.765175	0.101555	0.756432	0.0989683	0.767326	0.102681	0.812303	0.0998877	0.802523	0.100409	0.812547	0.100444	0.810001	0.0998964	0.828518	0.100453	0.808161	0.102347	0.797689	0.103738	0.817733	0.102275	0.825357	0.103809
3D plot	FALSE	0.853386	0.100312	2.04082	0.191452	6.16853	0.363766	0.537212	0.0713947	0.60022	0.07935	0.654493	0.084541	0.678114	0.0867228	0.671095	0.0910323	0.683068	0.0912543	0.711372	0.0922905	0.713576	0.0911802	0.738405	0.0953744	0.740246	0.0985406	0.737125	0.0960721	0.744882	0.0996801	0.792965	0.0970491	0.783053	0.0975454	0.793604	0.097624	0.791845	0.0971824	0.809068	0.0976054	0.788584	0.0994135	0.776236	0.100636	0.798875	0.0994206	0.80546	0.100862
Linear	FALSE	0.825008	0.100405	2.44077	0.214869	7.72917	0.40674	0.528879	0.0696083	0.590744	0.077333	0.643662	0.082308	0.666773	0.0843909	0.657714	0.0882982	0.670482	0.0886831	0.698872	0.0897234	0.703398	0.0891688	0.725285	0.092671	0.724484	0.0956699	0.724938	0.0935268	0.730702	0.0968873	0.780753	0.0946425	0.770759	0.0950743	0.781642	0.0952699	0.780377	0.0949707	0.796782	0.095252	0.776224	0.0968995	0.76269	0.0978641	0.786965	0.097079	0.792897	0.0983225
Data Range	AC3:AG99	0.846879	0.102249	2.89333	0.238746	9.62957	0.451068	0.526095	0.0682797	0.587577	0.0758401	0.640036	0.0806919	0.662975	0.0826116	0.653223	0.0860306	0.666259	0.0865639	0.694683	0.0876824	0.699984	0.0878158	0.72089	0.0905637	0.719164	0.0931753	0.720857	0.0915388	0.725933	0.0945288	0.776657	0.0928631	0.766638	0.0931961	0.777629	0.0935727	0.776527	0.0934403	0.792657	0.0935833	0.772083	0.0950088	0.758149	0.0956477	0.78297	0.0954398	0.788687	0.0963962
Filled Symbols	FALSE	0.880925	0.102383	3.40542	0.263093	11.9437	0.496793	0.529084	0.0675167	0.590974	0.0749922	0.643909	0.0798233	0.667027	0.081529	0.657987	0.0844132	0.670741	0.0850685	0.699143	0.0863328	0.70361	0.0872307	0.725576	0.0892231	0.724718	0.0912589	0.725215	0.0902691	0.730963	0.0927958	0.781008	0.0918548	0.771023	0.0920628	0.781892	0.09267	0.780607	0.0927154	0.797025	0.0927344	0.776496	0.0938944	0.76298	0.094166	0.787213	0.0946358	0.79317	0.095239
ConcAge	FALSE	0.871636	0.102392	3.98486	0.287918	14.7617	0.543959	0.537605	0.0673809	0.600661	0.0748581	0.654968	0.0797728	0.678602	0.0812308	0.671619	0.083577	0.683565	0.0843179	0.711892	0.085784	0.713981	0.087461	0.738964	0.088758	0.740696	0.090076	0.737657	0.0898206	0.745384	0.0918286	0.793453	0.0916995	0.783559	0.0917665	0.794083	0.0926349	0.792285	0.0928545	0.809534	0.0927742	0.789107	0.0936466	0.776792	0.0935392	0.79935	0.0947321	0.805984	0.0949448
ConcSwap	FALSE	0.879768	0.103379	4.64051	0.313231	18.1931	0.592611	0.550966	0.0678835	0.615853	0.0754487	0.672316	0.0805443	0.69676	0.0817412	0.693015	0.0835897	0.703691	0.084373	0.731896	0.0860804	0.730259	0.088488	0.759969	0.0892058	0.765804	0.0897223	0.757176	0.0902295	0.768027	0.0917055	0.812985	0.0924096	0.803231	0.0923309	0.813216	0.0934703	0.810616	0.0938465	0.829169	0.0936994	0.808893	0.0942856	0.798467	0.093818	0.818398	0.0957209	0.826089	0.0955375
1st Symbol-row	1	0.874404	0.103382	5.3824	0.339042	22.3716	0.642797	0.568087	0.0689836	0.635319	0.076716	0.694548	0.0820755	0.720033	0.0830188	0.720443	0.0844504	0.72949	0.0852293	0.757535	0.0871981	0.751123	0.0902286	0.786889	0.0905305	0.798007	0.0902266	0.78219	0.0914627	0.797058	0.0924366	0.838021	0.0939277	0.828444	0.0937105	0.837741	0.0951084	0.834115	0.0956109	0.854341	0.095435	0.834251	0.0957595	0.826247	0.0949799	0.842813	0.0975222	0.851858	0.0969689
		0.897503	0.103703	6.22187	0.365359	27.4597	0.694563	0.587579	0.0705922	0.657481	0.0785574	0.719862	0.0842422	0.746533	0.0849602	0.751679	0.0860893	0.75887	0.0868175	0.786732	0.0890464	0.774884	0.0925416	0.817544	0.0926246	0.834696	0.0915479	0.810673	0.0934204	0.830125	0.0939627	0.866533	0.0961308	0.857157	0.0957935	0.86567	0.0974165	0.860877	0.0980049	0.883009	0.0978405	0.863127	0.097949	0.857883	0.0969307	0.870618	0.0999899	0.881202	0.0991231
		0.877676	0.104592	7.17175	0.392195	33.6556	0.747961	0.607863	0.072579	0.680546	0.0808237	0.746209	0.0868689	0.774114	0.087408	0.784193	0.0883736	0.789453	0.0890088	0.817122	0.0914756	0.799617	0.0952397	0.84945	0.0953186	0.8729	0.0935793	0.840317	0.095944	0.86455	0.09616	0.896211	0.0988404	0.887043	0.098411	0.894742	0.100208	0.888736	0.100834	0.912851	0.100721	0.893182	0.100677	0.890812	0.0995123	0.899561	0.102924	0.911745	0.101826
		0.873838	0.104718	8.24657	0.419557	IsoLine	IsoLine	0.627297	0.074783	0.702643	0.0833314	0.771453	0.0897429	0.800542	0.0901639	0.815351	0.0911182	0.81876	0.0916258	0.846242	0.094289	0.823319	0.0981044	0.880022	0.0983941	0.909523	0.0961561	0.868722	0.098829	0.897543	0.0988506	0.92465	0.101837	0.91568	0.101351	0.922601	0.103256	0.915434	0.10387	0.94145	0.103843	0.921981	0.103721	0.922366	0.102516	0.927296	0.106087	0.941012	0.104857
		0.884655	0.105749	9.46276	0.447457			0.644306	0.0770256	0.721983	0.0858772	0.79355	0.0926312	0.823676	0.0930047	0.84263	0.0941009	0.844417	0.0944564	0.871733	0.0972586	0.844068	0.100903	0.906783	0.101602	0.941598	0.0990697	0.893584	0.101842	0.926432	0.101816	0.949547	0.104878	0.94075	0.104376	0.946989	0.106314	0.938808	0.106867	0.966489	0.106954	0.94719	0.106837	0.949988	0.105697	0.951576	0.109223	0.966632	0.107973
		0.895994	0.105891	10.8389	0.475906			0.657511	0.0791251	0.736999	0.0882549	0.810708	0.0952999	0.84164	0.0957002	0.863818	0.0970799	0.864346	0.0972713	0.89153	0.100144	0.860183	0.10341	0.927566	0.104682	0.966526	0.102084	0.912891	0.104738	0.948875	0.104817	0.968885	0.107716	0.96022	0.107239	0.965932	0.109135	0.956964	0.109581	0.985939	0.109801	0.966768	0.10977	0.971441	0.1088	0.970434	0.112077	0.986529	0.11092
		0.880951	0.10626	12.3961	0.504914			0.665843	0.0809116	0.746474	0.090272	0.821539	0.0975328	0.852981	0.0980321	0.877199	0.099814	0.876931	0.0998425	0.90403	0.102711	0.870361	0.105422	0.940686	0.107386	0.982289	0.104955	0.925079	0.107283	0.963056	0.10761	0.981096	0.110123	0.972514	0.109711	0.977894	0.111489	0.968431	0.111792	0.998224	0.112154	0.979128	0.112284	0.984987	0.111572	0.982344	0.114419	0.999091	0.11346
		0.911239	0.107367	14.158	0.534492			0.668628	0.0822401	0.749642	0.0917649	0.825165	0.099149	0.85678	0.0998114	0.88169	0.102082	0.881154	0.101962	0.908219	0.104752	0.873775	0.106775	0.945081	0.109493	0.987608	0.107449	0.929159	0.109271	0.967824	0.109969	0.985193	0.111902	0.976635	0.111589	0.981906	0.113186	0.972282	0.113323	1.00235	0.113823	0.983269	0.114175	0.989528	0.113788	0.986339	0.116058	1.0033	0.115386
		0.921321	0.107466	16.1518	0.564651
		0.927157	0.107685	18.4077	0.595403
		0.902547	0.108656	20.9604	0.62676
		0.911963	0.108898	23.8488	0.658732
		0.914815	0.109309	27.1171	0.691334
		0.920722	0.109657	30.8153	0.724576
		0.952349	0.111463	35	0.758471
		0.938669	0.111568	35	0.758471
		0.950351	0.112977	IsoLine	IsoLine
		1.00359	0.115145
		0.970224	0.115155
		1.04576	0.117666
		1.0803	0.120691
		1.05277	0.121702
		1.09136	0.123283
		1.14084	0.127612
		1.18502	0.130759
		1.25868	0.13511
		1.21536	0.135649
		1.27076	0.136441
		1.26779	0.138156
		1.2684	0.139251
		1.41846	0.14784
		1.47966	0.15557
		1.61953	0.159522
		1.70228	0.164798
		1.66377	0.167432
		1.75192	0.172791
		1.84704	0.181992
		1.84649	0.178095
		1.76424	0.168006
		1.92235	0.179111
		1.93205	0.178132
		2.51316	0.222721
		2.8581	0.235781
		3.37128	0.261612
		3.83835	0.27424
		5.26702	0.348798
		5.57511	0.358601
		5.47914	0.347834
		5.69837	0.356518
		5.47747	0.340588
		4.94146	0.307172
		5.43103	0.335485
		6.11946	0.37612
		5.91955	0.36023
		5.48978	0.333574
		5.59063	0.336685
		5.71836	0.341098
		6.1741	0.365225
		6.62552	0.389073
		6.81136	0.396364
		6.30198	0.361436
		6.83469	0.387024
		7.31917	0.41415
		6.58982	0.372519
		6.67114	0.376315
		7.10569	0.399919
		6.62674	0.371125
		6.83255	0.382169
		6.50746	0.36235
		7.09855	0.385901
		7.43735	0.402124
		7.19802	0.384043
		7.12504	0.377509
		8.18027	0.42525
		8.1364	0.394617
		9.49312	0.438272
		9.45783	0.433353
		12.2779	0.513794
		12.3381	0.515868
		13.6129	0.524861
		13.4194	0.51248
		26.2092	0.674513
		IsoLine	IsoLine
[truncated: 152 more columns]

## Sheet: PlotDat0
Source sheet	all data	0.597361	0.0752599	0	0	0.217708	0.0315113	0.668628	0.0822401	0.749642	0.0917649	0.825165	0.099149	0.85678	0.0998114	0.88169	0.102082	0.881154	0.101962	0.908219	0.104752	0.873775	0.106775	0.945081	0.109493	0.987608	0.107449	0.929159	0.109271	0.967824	0.109969	0.985193	0.111902	0.976635	0.111589	0.981906	0.113186	0.972282	0.113323	1.00235	0.113823	0.983269	0.114175	0.989528	0.113788	0.986339	0.116058	1.0033	0.115386
Plot name	Concordia0	0.668609	0.0838025	0.0558399	0.00859534	0.482812	0.0640155	0.665638	0.0830032	0.746244	0.0926127	0.821292	0.100018	0.852727	0.100894	0.879093	0.10334	0.878711	0.103127	0.905786	0.105816	0.870149	0.10736	0.942524	0.110559	0.984589	0.108921	0.924801	0.110541	0.965085	0.11131	0.980842	0.112911	0.97225	0.112722	0.977644	0.114089	0.968202	0.114048	0.997981	0.114672	0.978855	0.115289	0.986893	0.114954	0.982096	0.116862	0.998819	0.116543
Plot Type	1	0.732601	0.0899204	0.114798	0.0172646	0.805631	0.097544	0.657118	0.083139	0.736557	0.0927468	0.810233	0.100068	0.841153	0.101192	0.871617	0.104192	0.871678	0.103905	0.898793	0.106461	0.859778	0.107129	0.93518	0.111164	0.975835	0.110016	0.912359	0.110989	0.95718	0.112255	0.968396	0.113066	0.959714	0.113018	0.965453	0.114124	0.956524	0.113909	0.985473	0.114632	0.966244	0.115537	0.979317	0.115673	0.969959	0.116766	0.986005	0.116837
1st free col	203	0.759877	0.0912115	0.177048	0.0260083	1.19873	0.132129	0.643756	0.0826364	0.721366	0.0921563	0.792885	0.0992965	0.822994	0.100682	0.859589	0.104601	0.860363	0.104262	0.887546	0.106659	0.8435	0.106102	0.923369	0.111282	0.96173	0.110687	0.89284	0.11058	0.944453	0.112762	0.948864	0.112356	0.940042	0.112454	0.946319	0.113288	0.938193	0.112917	0.965837	0.113707	0.946459	0.114898	0.967131	0.115914	0.950911	0.115777	0.9659	0.116245
Sigma Level	2	0.767456	0.0940561	0.242774	0.0348272	1.67741	0.167804	0.626636	0.0815363	0.7019	0.090889	0.770653	0.0977654	0.799722	0.0994042	0.843534	0.10455	0.845262	0.104182	0.872536	0.1064	0.822636	0.104362	0.907608	0.110909	0.942889	0.110905	0.867826	0.109347	0.927463	0.112811	0.923828	0.110838	0.914829	0.111074	0.921795	0.11165	0.914694	0.111152	0.940666	0.111972	0.9211	0.113424	0.950868	0.115664	0.926496	0.113976	0.940131	0.114813
Absolute Errs	FALSE	0.773707	0.0942628	0.31217	0.0437219	2.2603	0.204603	0.607144	0.0799276	0.679737	0.0890476	0.745339	0.0955987	0.773222	0.0974629	0.824154	0.10404	0.827032	0.103668	0.854419	0.105696	0.798875	0.102049	0.888586	0.11006	0.920137	0.11066	0.839343	0.107389	0.90695	0.112397	0.895317	0.108635	0.886116	0.108991	0.893865	0.109342	0.887931	0.108758	0.911998	0.109566	0.892224	0.111235	0.931238	0.114937	0.898691	0.111508	0.910787	0.112659
Symbol Type	1	0.801451	0.0962171	0.385442	0.0526931	2.97009	0.242562	0.586859	0.0779409	0.656673	0.0867812	0.718992	0.0929719	0.74564	0.0950151	0.802296	0.103093	0.806473	0.102743	0.833987	0.104577	0.774142	0.0993508	0.867134	0.108773	0.894467	0.109963	0.809699	0.104866	0.883812	0.11154	0.865639	0.105925	0.85623	0.106374	0.864793	0.106551	0.860073	0.105929	0.882155	0.106686	0.862169	0.108507	0.909099	0.113763	0.869748	0.108574	0.880244	0.109956
Inverse Plot	FALSE	0.78688	0.0972952	0.462805	0.0617413	3.83441	0.281716	0.567425	0.0757369	0.634576	0.0842736	0.693748	0.090098	0.719213	0.0922591	0.778915	0.101752	0.784481	0.101447	0.812133	0.103094	0.750441	0.0964861	0.844189	0.107103	0.867002	0.108844	0.781295	0.101981	0.85906	0.110277	0.8372	0.102928	0.827593	0.103434	0.836935	0.103503	0.833375	0.102893	0.853556	0.103564	0.83337	0.105462	0.88542	0.112193	0.842013	0.105411	0.850977	0.106925
Color Plot	TRUE	0.832986	0.100028	0.544488	0.0708673	IsoLine	IsoLine	0.550417	0.0734943	0.615236	0.0817278	0.671651	0.0872097	0.696079	0.0894183	0.755034	0.100074	0.762018	0.0998378	0.789812	0.101309	0.729692	0.093687	0.820755	0.105125	0.838942	0.107352	0.756432	0.0989683	0.833776	0.108663	0.812303	0.0998877	0.802523	0.100409	0.812547	0.100444	0.810001	0.0998964	0.828518	0.100453	0.808161	0.102347	0.861234	0.110297	0.817733	0.102275	0.825357	0.103809
3D plot	FALSE	0.853386	0.100312	0.630731	0.0800718			0.537212	0.0713947	0.60022	0.07935	0.654493	0.084541	0.678114	0.0867228	0.731696	0.0981334	0.740067	0.0979846	0.768	0.0993026	0.713576	0.0911802	0.797855	0.102923	0.811513	0.105552	0.737125	0.0960721	0.809064	0.106769	0.792965	0.0970491	0.783053	0.0975454	0.793604	0.097624	0.791845	0.0971824	0.809068	0.0976054	0.788584	0.0994135	0.837599	0.108157	0.798875	0.0994206	0.80546	0.100862
Linear	FALSE	0.825008	0.100405	0.721791	0.0893554			0.528879	0.0696083	0.590744	0.077333	0.643662	0.082308	0.666773	0.0843909	0.70992	0.0960144	0.719585	0.0959688	0.74765	0.0971609	0.703398	0.0891688	0.77649	0.100595	0.785915	0.103523	0.724938	0.0935268	0.786005	0.104677	0.780753	0.0946425	0.770759	0.0950743	0.781642	0.0952699	0.780377	0.0949707	0.796782	0.095252	0.776224	0.0968995	0.815548	0.105867	0.786965	0.097079	0.792897	0.0983225
Data Range	AC3:AG99	0.846879	0.102249	0.817936	0.0987188			0.526095	0.0682797	0.587577	0.0758401	0.640036	0.0806919	0.662975	0.0826116	0.690659	0.0938099	0.701469	0.0938785	0.729652	0.094978	0.699984	0.0878158	0.757595	0.0982427	0.763265	0.101354	0.720857	0.0915388	0.765606	0.102479	0.776657	0.0928631	0.766638	0.0931961	0.777629	0.0935727	0.776527	0.0934403	0.792657	0.0935833	0.772083	0.0950088	0.796044	0.103526	0.78297	0.0954398	0.788687	0.0963962
Filled Symbols	FALSE	0.880925	0.102383	0.919449	0.108163			0.529084	0.0675167	0.590974	0.0749922	0.643909	0.0798233	0.667027	0.081529	0.674755	0.091616	0.68651	0.0918049	0.714791	0.0928493	0.70361	0.0872307	0.741995	0.095968	0.744554	0.0991397	0.725215	0.0902691	0.748759	0.100271	0.781008	0.0918548	0.771023	0.0920628	0.781892	0.09267	0.780607	0.0927154	0.797025	0.0927344	0.776496	0.0938944	0.779941	0.101238	0.787213	0.0946358	0.79317	0.095239
ConcAge	FALSE	0.871636	0.102392	1.02663	0.117688			0.537605	0.0673809	0.600661	0.0748581	0.654968	0.0797728	0.678602	0.0812308	0.662902	0.0895288	0.675362	0.0898387	0.703718	0.0908677	0.713981	0.087461	0.730371	0.0938708	0.730599	0.0969764	0.737657	0.0898206	0.736201	0.0981497	0.793453	0.0916995	0.783559	0.0917665	0.794083	0.0926349	0.792285	0.0928545	0.809534	0.0927742	0.789107	0.0936466	0.767941	0.0991013	0.79935	0.0947321	0.805984	0.0949448
ConcSwap	FALSE	0.879768	0.103379	1.1398	0.127295			0.550966	0.0678835	0.615853	0.0754487	0.672316	0.0805443	0.69676	0.0817412	0.655619	0.0876395	0.668512	0.0880659	0.696916	0.08912	0.730259	0.088488	0.723232	0.0920428	0.722011	0.0949589	0.757176	0.0902295	0.72848	0.0962072	0.812985	0.0924096	0.803231	0.0923309	0.813216	0.0934703	0.810616	0.0938465	0.829169	0.0936994	0.808893	0.0942856	0.76057	0.0972104	0.818398	0.0957209	0.826089	0.0955375
1st Symbol-row	1	0.874404	0.103382	1.25928	0.136984			0.568087	0.0689836	0.635319	0.076716	0.694548	0.0820755	0.720033	0.0830188	0.653223	0.0860306	0.666259	0.0865639	0.694683	0.0876824	0.751123	0.0902286	0.72089	0.0905637	0.719164	0.0931753	0.78219	0.0914627	0.725933	0.0945288	0.838021	0.0939277	0.828444	0.0937105	0.837741	0.0951084	0.834115	0.0956109	0.854341	0.095435	0.834251	0.0957595	0.758149	0.0956477	0.842813	0.0975222	0.851858	0.0969689
		0.897503	0.103703	1.38544	0.146757			0.587579	0.0705922	0.657481	0.0785574	0.719862	0.0842422	0.746533	0.0849602	0.65582	0.0847725	0.668703	0.0853984	0.697116	0.0866178	0.774884	0.0925416	0.723447	0.0894983	0.722184	0.0917037	0.810673	0.0934204	0.728673	0.0931878	0.866533	0.0961308	0.857157	0.0957935	0.86567	0.0974165	0.860877	0.0980049	0.883009	0.0978405	0.863127	0.097949	0.760784	0.0944813	0.870618	0.0999899	0.881202	0.0991231
		0.877676	0.104592	1.51864	0.156614			0.607863	0.072579	0.680546	0.0808237	0.746209	0.0868689	0.774114	0.087408	0.663296	0.0839201	0.675736	0.0846204	0.704109	0.0859728	0.799617	0.0952397	0.730791	0.0888931	0.730937	0.0906083	0.840317	0.095944	0.736578	0.0922428	0.896211	0.0988404	0.887043	0.098411	0.894742	0.100208	0.888736	0.100834	0.912851	0.100721	0.893182	0.100677	0.76836	0.0937624	0.899561	0.102924	0.911745	0.101826
		0.873838	0.104718	1.65929	0.166555			0.627297	0.074783	0.702643	0.0833314	0.771453	0.0897429	0.800542	0.0901639	0.675324	0.0835107	0.68705	0.0842637	0.715356	0.0857755	0.823319	0.0981044	0.742602	0.0887746	0.745043	0.089937	0.868722	0.098829	0.749304	0.0917351	0.92465	0.101837	0.91568	0.101351	0.922601	0.103256	0.915434	0.10387	0.94145	0.103843	0.921981	0.103721	0.780546	0.0935222	0.927296	0.106087	0.941012	0.104857
		0.884655	0.105749	1.80778	0.176582			0.644306	0.0770256	0.721983	0.0858772	0.79355	0.0926312	0.823676	0.0930047	0.691379	0.0835621	0.702152	0.084344	0.730367	0.0860345	0.844068	0.100903	0.758363	0.0891479	0.763883	0.0897191	0.893584	0.101842	0.766295	0.0916869	0.949547	0.104878	0.94075	0.104376	0.946989	0.106314	0.938808	0.106867	0.966489	0.106954	0.94719	0.106837	0.796809	0.0937713	0.951576	0.109223	0.966632	0.107973
		0.895994	0.105891	1.96457	0.186695			0.657511	0.0791251	0.736999	0.0882549	0.810708	0.0952999	0.84164	0.0957002	0.710759	0.0840722	0.720381	0.0848579	0.748483	0.0867386	0.860183	0.10341	0.777385	0.0899968	0.786636	0.0899642	0.912891	0.104738	0.786807	0.0921003	0.968885	0.107716	0.96022	0.107239	0.965932	0.109135	0.956964	0.109581	0.985939	0.109801	0.966768	0.10977	0.816439	0.0944989	0.970434	0.112077	0.986529	0.11092
		0.880951	0.10626	2.13011	0.196895			0.665843	0.0809116	0.746474	0.090272	0.821539	0.0975328	0.852981	0.0980321	0.732617	0.0850187	0.740941	0.0857827	0.768915	0.0878569	0.870361	0.105422	0.798837	0.0912841	0.812305	0.0906616	0.925079	0.107283	0.809945	0.0929572	0.981096	0.110123	0.972514	0.109711	0.977894	0.111489	0.968431	0.111792	0.998224	0.112154	0.979128	0.112284	0.838578	0.0956731	0.982344	0.114419	0.999091	0.11346
		0.911239	0.107367	2.30489	0.207183			0.668628	0.0822401	0.749642	0.0917649	0.825165	0.099149	0.85678	0.0998114	0.755998	0.0863601	0.762933	0.0870782	0.790769	0.0893406	0.873775	0.106775	0.821782	0.0929535	0.83977	0.0917808	0.929159	0.109271	0.834698	0.0942202	0.985193	0.111902	0.976635	0.111589	0.981906	0.113186	0.972282	0.113323	1.00235	0.113823	0.983269	0.114175	0.862257	0.0972426	0.986339	0.116058	1.0033	0.115386
		0.921321	0.107466	2.48944	0.217559											0.779879	0.0880379	0.785395	0.0886877	0.81309	0.0911249			0.845217	0.0949322	0.86783	0.0932728			0.859982	0.0958342													0.886443	0.0991387
		0.927157	0.107685	2.68428	0.228024											0.803217	0.0899787	0.807347	0.0905409	0.834902	0.0931317			0.868116	0.0971336	0.895259	0.0950725			0.884694	0.0977284													0.910078	0.101279
		0.902547	0.108656	2.89001	0.23858											0.824993	0.0920977	0.827829	0.0925567	0.855252	0.0952733			0.889481	0.0994615	0.920858	0.0971012			0.907753	0.0998202													0.932129	0.103569
		0.911963	0.108898	3.10723	0.249226											0.844254	0.0943023	0.845945	0.0946471	0.873251	0.0974562			0.908376	0.101814	0.943508	0.0992702			0.928152	0.102018													0.951633	0.10591
		0.914815	0.109309	3.33658	0.259963											0.860158	0.0964961	0.860904	0.0967207	0.888111	0.0995849			0.923977	0.104089	0.962219	0.101485			0.944998	0.104226													0.967736	0.108198
		0.920722	0.109657	3.57873	0.270793											0.872011	0.0985833	0.872052	0.0986868	0.899184	0.101567			0.9356	0.106186	0.976174	0.103648			0.957557	0.106348													0.979736	0.110334
		0.952349	0.111463	3.83441	0.281716											0.879294	0.100473	0.878902	0.10046	0.905986	0.103314			0.942739	0.108014	0.984762	0.105666			0.965278	0.10829													0.987107	0.112225
		0.938669	0.111568	4	0.288474											0.88169	0.102082	0.881154	0.101962	0.908219	0.104752			0.945081	0.109493	0.987608	0.107449			0.967824	0.109969													0.989528	0.113788
		0.950351	0.112977	IsoLine	IsoLine
		1.00359	0.115145
		0.970224	0.115155
		1.04576	0.117666
		1.0803	0.120691
		1.05277	0.121702
		1.09136	0.123283
		1.14084	0.127612
		1.18502	0.130759
		1.25868	0.13511
		1.21536	0.135649
		1.27076	0.136441
		1.26779	0.138156
		1.2684	0.139251
		1.41846	0.14784
		1.47966	0.15557
		1.61953	0.159522
		1.70228	0.164798
		1.66377	0.167432
		1.75192	0.172791
		1.84704	0.181992
		1.84649	0.178095
		1.76424	0.168006
		1.92235	0.179111
		1.93205	0.178132
		2.51316	0.222721
		2.8581	0.235781
		3.37128	0.261612
		3.83835	0.27424
		5.26702	0.348798
		5.57511	0.358601
		5.47914	0.347834
		5.69837	0.356518
		5.47747	0.340588
		4.94146	0.307172
		5.43103	0.335485
		6.11946	0.37612
		5.91955	0.36023
		5.48978	0.333574
		5.59063	0.336685
		5.71836	0.341098
		6.1741	0.365225
		6.62552	0.389073
		6.81136	0.396364
		6.30198	0.361436
		6.83469	0.387024
		7.31917	0.41415
		6.58982	0.372519
		6.67114	0.376315
		7.10569	0.399919
		6.62674	0.371125
		6.83255	0.382169
		6.50746	0.36235
		7.09855	0.385901
		7.43735	0.402124
		7.19802	0.384043
		7.12504	0.377509
		8.18027	0.42525
		8.1364	0.394617
		9.49312	0.438272
		9.45783	0.433353
		12.2779	0.513794
		12.3381	0.515868
		13.6129	0.524861
		13.4194	0.51248
		26.2092	0.674513
		IsoLine	IsoLine
[truncated: 152 more columns]

## Sheet: PlotDat1
Source sheet	all data	0.597361	0.0752599	0	0	0.103498	0.0156334	0.668628	0.0822401	0.749642	0.0917649	0.825165	0.099149	0.85678	0.0998114	0.88169	0.102082	0.881154	0.101962	0.908219	0.104752	0.873775	0.106775	0.945081	0.109493	0.987608	0.107449	0.929159	0.109271	0.967824	0.109969	0.985193	0.111902	0.976635	0.111589	0.981906	0.113186	0.972282	0.113323	1.00235	0.113823	0.983269	0.114175	0.989528	0.113788	0.986339	0.116058	1.0033	0.115386
Plot name	Concordia0	0.668609	0.0838025	0.0345435	0.00536346	0.217708	0.0315113	0.666995	0.0828594	0.747786	0.0924546	0.823051	0.0998642	0.854568	0.10068	0.879093	0.10334	0.878711	0.103127	0.905786	0.105816	0.870149	0.10736	0.942524	0.110559	0.984589	0.108921	0.92678	0.110279	0.965085	0.11131	0.98282	0.112723	0.974244	0.112499	0.979582	0.113931	0.970058	0.113938	0.999969	0.114531	0.980861	0.115074	0.986893	0.114954	0.984025	0.116734	1.00086	0.116316
Plot Type	1	0.732601	0.0899204	0.0702803	0.0107557	0.343738	0.0476374	0.662318	0.0831465	0.74247	0.0927662	0.816984	0.100145	0.848219	0.101134	0.871617	0.104192	0.871678	0.103905	0.898793	0.106461	0.859778	0.107129	0.93518	0.111164	0.975835	0.110016	0.919954	0.110856	0.95718	0.112255	0.975994	0.113092	0.967367	0.112968	0.972896	0.114215	0.963654	0.114091	0.99311	0.114766	0.973943	0.115516	0.979317	0.115673	0.977369	0.11693	0.993828	0.116791
1st free col	203	0.759877	0.0912115	0.107252	0.0161768	0.482812	0.0640155	0.654803	0.0830889	0.733926	0.092686	0.807228	0.0999785	0.838008	0.101154	0.859589	0.104601	0.860363	0.104262	0.887546	0.106659	0.8435	0.106102	0.923369	0.111282	0.96173	0.110687	0.908978	0.110976	0.944453	0.112762	0.965014	0.112992	0.956307	0.112974	0.962139	0.114025	0.95335	0.113777	0.982073	0.114517	0.962818	0.11548	0.967131	0.115914	0.96666	0.116638	0.982523	0.116789
Sigma Level	2	0.767456	0.0940561	0.1455	0.0216271	0.636279	0.0806498	0.644778	0.0826892	0.722527	0.0922175	0.794212	0.0993726	0.824383	0.100741	0.843534	0.10455	0.845262	0.104182	0.872536	0.1064	0.822636	0.104362	0.907608	0.110909	0.942889	0.110905	0.894333	0.110634	0.927463	0.112811	0.950358	0.112429	0.941547	0.112518	0.947782	0.11337	0.939595	0.113008	0.967339	0.113795	0.947971	0.114968	0.950868	0.115664	0.952368	0.115869	0.967437	0.116311
Absolute Errs	FALSE	0.773707	0.0942628	0.18507	0.0271065	0.805631	0.097544	0.63268	0.0819648	0.708772	0.0913813	0.778502	0.0983537	0.807938	0.0999102	0.824154	0.10404	0.827032	0.103668	0.854419	0.105696	0.798875	0.102049	0.888586	0.11006	0.920137	0.11066	0.876657	0.109845	0.90695	0.112397	0.932668	0.111427	0.923731	0.111619	0.930453	0.112278	0.922991	0.111818	0.949553	0.112633	0.930053	0.114002	0.931238	0.114937	0.935116	0.114659	0.949229	0.115378
Symbol Type	1	0.801451	0.0962171	0.226006	0.0326154	0.99251	0.114702	0.619038	0.0809473	0.693262	0.0902139	0.760786	0.0969661	0.789393	0.0986996	0.802296	0.103093	0.806473	0.102743	0.833987	0.104577	0.774142	0.0993508	0.867134	0.108773	0.894467	0.109963	0.856724	0.108643	0.883812	0.11154	0.912716	0.11003	0.903638	0.110317	0.910909	0.110798	0.904264	0.11026	0.929493	0.11108	0.909845	0.112626	0.909099	0.113763	0.915659	0.113059	0.928694	0.11403
Inverse Plot	FALSE	0.78688	0.0972952	0.268357	0.0381538	1.19873	0.132129	0.604449	0.0796813	0.676674	0.0887662	0.741839	0.0952707	0.769558	0.0971618	0.778915	0.101752	0.784481	0.101447	0.812133	0.103094	0.750441	0.0964861	0.844189	0.107103	0.867002	0.108844	0.835405	0.107082	0.85906	0.110277	0.891375	0.108298	0.882146	0.108669	0.890004	0.108993	0.884231	0.108401	0.908034	0.109205	0.888232	0.110898	0.88542	0.112193	0.894846	0.111139	0.90673	0.112326
Color Plot	TRUE	0.832986	0.100028	0.31217	0.0437219	1.42629	0.149828	0.58955	0.0782221	0.659733	0.0871016	0.722488	0.0933414	0.7493	0.0953639	0.755034	0.100074	0.762018	0.0998378	0.789812	0.101309	0.729692	0.093687	0.820755	0.105125	0.838942	0.107352	0.813632	0.105228	0.833776	0.108663	0.869577	0.106308	0.860196	0.106746	0.868651	0.106943	0.863769	0.106323	0.886115	0.107089	0.866157	0.108894	0.861234	0.110297	0.873588	0.108984	0.884296	0.110341
3D plot	FALSE	0.853386	0.100312	0.357497	0.0493199	1.67741	0.167804	0.574993	0.0766333	0.643181	0.0852928	0.703578	0.0912626	0.729504	0.0933846	0.731696	0.0981334	0.740067	0.0979846	0.768	0.0993026	0.713576	0.0911802	0.797855	0.102923	0.811513	0.105552	0.792356	0.103164	0.809064	0.106769	0.848275	0.104146	0.838745	0.104634	0.847784	0.104737	0.843772	0.104116	0.864694	0.104825	0.844585	0.106703	0.837599	0.108157	0.852814	0.106687	0.862374	0.108161
Linear	FALSE	0.825008	0.100405	0.40439	0.0549478	IsoLine	IsoLine	0.561413	0.0749846	0.62774	0.0834189	0.685938	0.0891251	0.711036	0.0913102	0.70992	0.0960144	0.719585	0.0959688	0.74765	0.0971609	0.703398	0.0891688	0.77649	0.100595	0.785915	0.103523	0.772506	0.100979	0.786005	0.104677	0.8284	0.101908	0.818732	0.102423	0.828315	0.102472	0.825114	0.101877	0.844707	0.102513	0.82446	0.104419	0.815548	0.105867	0.833432	0.10435	0.841922	0.105883
Data Range	AC3:AG99	0.846879	0.102249	0.452903	0.060606			0.549404	0.0733479	0.614085	0.0815618	0.670336	0.0870224	0.694702	0.0892316	0.690659	0.0938099	0.701469	0.0938785	0.729652	0.094978	0.699984	0.0878158	0.757595	0.0982427	0.763265	0.101354	0.754952	0.0987689	0.765606	0.102479	0.81082	0.0996895	0.801031	0.100211	0.811095	0.100246	0.80861	0.0997041	0.827027	0.100252	0.80666	0.102143	0.796044	0.103526	0.816288	0.102073	0.823832	0.103604
Filled Symbols	FALSE	0.880925	0.102383	0.503091	0.0662945			0.539492	0.0717947	0.602813	0.0798025	0.657456	0.0850463	0.681217	0.0872395	0.674755	0.091616	0.68651	0.0918049	0.714791	0.0928493	0.70361	0.0872307	0.741995	0.095968	0.744554	0.0991397	0.740459	0.0966304	0.748759	0.100271	0.796305	0.0975892	0.786415	0.0980939	0.796876	0.0981577	0.794981	0.0976916	0.812427	0.0981423	0.791965	0.0999738	0.779941	0.101238	0.802132	0.0999573	0.808896	0.101426
ConcAge	FALSE	0.871636	0.102392	0.555013	0.0720136			0.532108	0.0703931	0.594417	0.0782181	0.64786	0.0832833	0.671169	0.085421	0.662902	0.0895288	0.675362	0.0898387	0.703718	0.0908677	0.713981	0.087461	0.730371	0.0938708	0.730599	0.0969764	0.729661	0.0946569	0.736201	0.0981497	0.785488	0.0956984	0.775525	0.096165	0.78628	0.0962973	0.784824	0.0959278	0.801546	0.0962755	0.781015	0.0980065	0.767941	0.0991013	0.791583	0.0980947	0.797767	0.0994429
ConcSwap	FALSE	0.879768	0.103379	0.608729	0.0777633			0.527577	0.0692041	0.589263	0.0768778	0.641967	0.0818104	0.664999	0.0838556	0.655619	0.0876395	0.668512	0.0880659	0.696916	0.08912	0.730259	0.088488	0.723232	0.0920428	0.722011	0.0949589	0.723031	0.0929347	0.72848	0.0962072	0.778842	0.0940997	0.768835	0.0945082	0.779769	0.0947463	0.778582	0.0944897	0.794858	0.0947334	0.77429	0.096327	0.76057	0.0972104	0.785101	0.0965666	0.790931	0.0977414
1st Symbol-row	1	0.874404	0.103382	0.6643	0.0835438			0.526095	0.0682797	0.587577	0.0758401	0.640036	0.0806919	0.662975	0.0826116	0.653223	0.0860306	0.666259	0.0865639	0.694683	0.0876824	0.751123	0.0902286	0.72089	0.0905637	0.719164	0.0931753	0.720857	0.0915388	0.725933	0.0945288	0.776657	0.0928631	0.766638	0.0931961	0.777629	0.0935727	0.776527	0.0934403	0.792657	0.0935833	0.772083	0.0950088	0.758149	0.0956477	0.78297	0.0954398	0.788687	0.0963962
		0.897503	0.103703	0.721791	0.0893554			0.527728	0.0676605	0.589433	0.0751504	0.64215	0.0799767	0.665186	0.0817435	0.65582	0.0847725	0.668703	0.0853984	0.697116	0.0866178	0.774884	0.0925416	0.723447	0.0894983	0.722184	0.0917037	0.723236	0.0905305	0.728673	0.0931878	0.77903	0.0920425	0.769029	0.0922858	0.779953	0.0928277	0.778751	0.0928254	0.795038	0.0928755	0.774491	0.0941093	0.760784	0.0944813	0.785284	0.0947635	0.791133	0.0954659
		0.877676	0.104592	0.781268	0.0951981			0.532404	0.0673734	0.594749	0.0748388	0.648218	0.0796961	0.671536	0.0812892	0.663296	0.0839201	0.675736	0.0846204	0.704109	0.0859728	0.799617	0.0952397	0.730791	0.0888931	0.730937	0.0906083	0.730062	0.0899538	0.736578	0.0922428	0.785855	0.0916738	0.775906	0.0918173	0.78664	0.0925438	0.785155	0.0926718	0.801897	0.0926409	0.781409	0.093668	0.76836	0.0937624	0.79194	0.0945674	0.798161	0.0949912
		0.873838	0.104718	0.842799	0.101072			0.539919	0.0674309	0.603293	0.074919	0.657973	0.0798624	0.681747	0.0812686	0.675324	0.0835107	0.68705	0.0842637	0.715356	0.0857755	0.823319	0.0981044	0.742602	0.0887746	0.745043	0.089937	0.741038	0.0898338	0.749304	0.0917351	0.796836	0.0917731	0.786966	0.091811	0.797396	0.0927335	0.795459	0.0929863	0.812934	0.0928898	0.792534	0.0937041	0.780546	0.0935222	0.802649	0.09486	0.809466	0.0949929
		0.884655	0.105749	0.906456	0.106978			0.549945	0.0678306	0.614691	0.0753874	0.67099	0.0804682	0.695372	0.0816825	0.691379	0.0835621	0.702152	0.084344	0.730367	0.0860345	0.844068	0.100903	0.758363	0.0891479	0.763883	0.0897191	0.755683	0.0901758	0.766295	0.0916869	0.811492	0.0923361	0.801726	0.0922671	0.811753	0.0933885	0.809214	0.0937551	0.827668	0.0936113	0.80738	0.094216	0.796809	0.0937713	0.816941	0.0956285	0.824552	0.0954709
		0.895994	0.105891	0.972312	0.112915			0.562043	0.0685551	0.628447	0.0762236	0.686699	0.0814872	0.711816	0.0825129	0.710759	0.0840722	0.720381	0.0848579	0.748483	0.0867386	0.860183	0.10341	0.777385	0.0899968	0.786636	0.0899642	0.773359	0.0909649	0.786807	0.0921003	0.829182	0.0933383	0.819542	0.0931657	0.829082	0.0944801	0.825818	0.0949446	0.845454	0.0947738	0.825298	0.0951815	0.816439	0.0944989	0.834193	0.0968392	0.84276	0.0964044
		0.880951	0.10626	1.04044	0.118884			0.575684	0.0695725	0.643957	0.0773911	0.704415	0.0828747	0.730361	0.0837235	0.732617	0.0850187	0.740941	0.0857827	0.768915	0.0878569	0.870361	0.105422	0.798837	0.0912841	0.812305	0.0906616	0.793292	0.0921666	0.809945	0.0929572	0.849134	0.0947357	0.839635	0.0944676	0.848627	0.0959606	0.844545	0.0965028	0.865514	0.0963266	0.845506	0.0965582	0.838578	0.0956731	0.85365	0.0984394	0.863295	0.0977524
		0.911239	0.107367	1.11093	0.124885			0.590273	0.0708385	0.660545	0.0788387	0.723362	0.0845702	0.750197	0.0852613	0.755998	0.0863601	0.762933	0.0870782	0.790769	0.0893406	0.873775	0.106775	0.821782	0.0929535	0.83977	0.0917808	0.814611	0.0937283	0.834698	0.0942202	0.870475	0.0964673	0.861127	0.0961159	0.869532	0.0977654	0.864578	0.0983617	0.886973	0.0982019	0.86712	0.098286	0.862257	0.0972426	0.874463	0.100359	0.885259	0.0994561
		0.921321	0.107466	1.18385	0.130918			0.605172	0.0722978	0.677486	0.0805033	0.742713	0.0864995	0.770455	0.0870591	0.779879	0.0880379	0.785395	0.0886877	0.81309	0.0911249			0.845217	0.0949322	0.86783	0.0932728	0.836384	0.0955818	0.859982	0.0958342	0.892273	0.0984574	0.883077	0.0980384	0.890885	0.0998155	0.88504	0.10044	0.908892	0.100318	0.889195	0.100289	0.886443	0.0991387	0.895721	0.102514	0.907693	0.101441
		0.927157	0.107685	1.25928	0.136984			0.61973	0.0738865	0.694038	0.0823121	0.761623	0.0885783	0.79025	0.0890385	0.803217	0.0899787	0.807347	0.0905409	0.834902	0.0931317			0.868116	0.0971336	0.895259	0.0950725	0.85766	0.0976461	0.884694	0.0977284	0.913575	0.100619	0.904528	0.100151	0.911752	0.102021	0.905037	0.102647	0.930313	0.102581	0.910766	0.102481	0.910078	0.101279	0.916495	0.104811	0.929615	0.103621
		0.902547	0.108656	1.33733	0.143082			0.633309	0.0755353	0.709479	0.084186	0.779264	0.0907158	0.808719	0.0911128	0.824993	0.0920977	0.827829	0.0925567	0.855252	0.0952733			0.889481	0.0994615	0.920858	0.0971012	0.87751	0.099831	0.907753	0.0998202	0.93345	0.102858	0.924541	0.102362	0.931221	0.104287	0.923695	0.104886	0.9503	0.104894	0.930891	0.104765	0.932129	0.103569	0.935877	0.107148	0.950067	0.105899
		0.911963	0.108898	1.41807	0.149213			0.645318	0.077172	0.723134	0.0860432	0.794865	0.0928185	0.825053	0.0931914	0.844254	0.0943023	0.845945	0.0946471	0.873251	0.0974562			0.908376	0.101814	0.943508	0.0992702	0.895064	0.102041	0.928152	0.102018	0.951029	0.105076	0.942242	0.104574	0.948441	0.106512	0.940199	0.107059	0.96798	0.107154	0.948691	0.107041	0.951633	0.10591	0.953021	0.109425	0.968157	0.108178
		0.914815	0.109309	1.50159	0.155377			0.655231	0.0787251	0.734406	0.0878024	0.807745	0.0947945	0.838538	0.0951836	0.860158	0.0964961	0.860904	0.0967207	0.888111	0.0995849			0.923977	0.104089	0.962219	0.101485	0.909557	0.104179	0.944998	0.104226	0.965545	0.107176	0.956858	0.106691	0.96266	0.108601	0.953828	0.109071	0.98258	0.109264	0.963387	0.10921	0.967736	0.108198	0.967177	0.111541	0.983093	0.110356
		0.920722	0.109657	1.58801	0.161574			0.662614	0.0801268	0.742802	0.0893868	0.817341	0.0965575	0.848585	0.0970021	0.872011	0.0985833	0.872052	0.0986868	0.899184	0.101567			0.9356	0.106186	0.976174	0.103648	0.920355	0.106153	0.957557	0.106348	0.976362	0.109067	0.967748	0.10862	0.973256	0.110461	0.963985	0.110835	0.993461	0.111131	0.974336	0.111177	0.979736	0.110334	0.977726	0.113403	0.994222	0.112339
		0.952349	0.111463	1.67741	0.167804			0.667146	0.0813158	0.747956	0.0907272	0.823234	0.0980305	0.854756	0.0985675	0.879294	0.100473	0.878902	0.10046	0.905986	0.103314			0.942739	0.108014	0.984762	0.105666	0.926985	0.107875	0.965278	0.10829	0.983008	0.110666	0.974438	0.110277	0.979766	0.112012	0.970227	0.112273	1.00015	0.112673	0.981062	0.112857	0.987107	0.112225	0.984208	0.114931	1.00106	0.114041
		0.938669	0.111568	1.76989	0.174067			0.668628	0.0822401	0.749642	0.0917649	0.825165	0.099149	0.85678	0.0998114	0.88169	0.102082	0.881154	0.101962	0.908219	0.104752			0.945081	0.109493	0.987608	0.107449	0.929159	0.109271	0.967824	0.109969	0.985193	0.111902	0.976635	0.111589	0.981906	0.113186	0.972282	0.113323	1.00235	0.113823	0.983269	0.114175	0.989528	0.113788	0.986339	0.116058	1.0033	0.115386
		0.950351	0.112977	1.8	0.176049
		1.00359	0.115145	IsoLine	IsoLine
		0.970224	0.115155
		1.04576	0.117666
		1.0803	0.120691
		1.05277	0.121702
		1.09136	0.123283
		1.14084	0.127612
		1.18502	0.130759
		1.25868	0.13511
		1.21536	0.135649
		1.27076	0.136441
		1.26779	0.138156
		1.2684	0.139251
		1.41846	0.14784
		1.47966	0.15557
		1.61953	0.159522
		1.70228	0.164798
		1.66377	0.167432
		1.75192	0.172791
		1.84704	0.181992
		1.84649	0.178095
		1.76424	0.168006
		1.92235	0.179111
		1.93205	0.178132
		2.51316	0.222721
		2.8581	0.235781
		3.37128	0.261612
		3.83835	0.27424
		5.26702	0.348798
		5.57511	0.358601
		5.47914	0.347834
		5.69837	0.356518
		5.47747	0.340588
		4.94146	0.307172
		5.43103	0.335485
		6.11946	0.37612
		5.91955	0.36023
		5.48978	0.333574
		5.59063	0.336685
		5.71836	0.341098
		6.1741	0.365225
		6.62552	0.389073
		6.81136	0.396364
		6.30198	0.361436
		6.83469	0.387024
		7.31917	0.41415
		6.58982	0.372519
		6.67114	0.376315
		7.10569	0.399919
		6.62674	0.371125
		6.83255	0.382169
		6.50746	0.36235
		7.09855	0.385901
		7.43735	0.402124
		7.19802	0.384043
		7.12504	0.377509
		8.18027	0.42525
		8.1364	0.394617
		9.49312	0.438272
		9.45783	0.433353
		12.2779	0.513794
		12.3381	0.515868
		13.6129	0.524861
		13.4194	0.51248
		26.2092	0.674513
		IsoLine	IsoLine
[truncated: 152 more columns]

## Sheet: PlotDat3
Source sheet	all data	0.597361	0.0752599	0.513349	0.0673218	0.574259	0.0739651	0.637621	0.0806498	0.703532	0.087376	0.772097	0.0941442	0.48	0.0636975	0.48	0.0635838	0.48	0.0638112	0.45389	0.0607196	0.668628	0.0822401	0.749642	0.0917649	0.694632	0.0854852
Plot name	Concordia0	0.668609	0.0838025	0.513307	0.0673474	0.574211	0.0739934	0.637566	0.0806807	0.703471	0.0874097	0.772028	0.0941805	0.48	0.0636975	0.48	0.0635838	0.48	0.0638112	0.512308	0.0673218	0.667596	0.0827559	0.748796	0.0922655	0.693674	0.0859606
Plot Type	1	IsoLine	IsoLine	0.513184	0.067371	0.574071	0.0740194	0.637408	0.0807091	0.703293	0.0874405	0.771829	0.0942139	0.48945	0.0647644	0.48945	0.0646488	0.48945	0.06488	0.573073	0.0739651	0.664648	0.0830672	0.74639	0.0926015	0.690934	0.0862457
1st free col	29			0.51299	0.0673906	0.57385	0.0740409	0.637158	0.0807327	0.703012	0.0874662	0.771516	0.0942416	0.498959	0.0658323	0.498959	0.0657147	0.498959	0.0659499	0.636279	0.0806498	0.659865	0.0831656	0.74247	0.0927662	0.686488	0.0863329
Sigma Level	2			0.512741	0.0674046	0.573566	0.0740564	0.636837	0.0807496	0.702651	0.0874846	0.771113	0.0942615	0.50853	0.0669013	0.50853	0.0667818	0.50853	0.0670209	0.702025	0.087376	0.653377	0.0830483	0.737112	0.0927564	0.680458	0.0862197
Absolute Errs	FALSE			0.512456	0.0674119	0.573242	0.0740644	0.63647	0.0807584	0.70224	0.0874941	0.770653	0.0942718	0.518162	0.0679714	0.518162	0.0678499	0.518162	0.068093	0.770413	0.0941442	0.645361	0.0827186	0.730421	0.0925723	0.673007	0.0859093
Symbol Type	1			0.51216	0.0674119	0.572904	0.0740644	0.636089	0.0807584	0.701811	0.0874941	0.770174	0.0942718	0.527855	0.0690426	0.527855	0.0689191	0.527855	0.0691661	IsoLine	IsoLine	0.636036	0.0821854	0.722527	0.0922175	0.664339	0.08541
Inverse Plot	FALSE			0.511876	0.0674046	0.57258	0.0740564	0.635722	0.0807496	0.7014	0.0874846	0.769714	0.0942615	0.53761	0.0701148	0.53761	0.0699893	0.53761	0.0702403			0.625656	0.0814633	0.713584	0.091699	0.654691	0.0847356
Color Plot	TRUE			0.511626	0.0673906	0.572296	0.0740409	0.635401	0.0807327	0.701039	0.0874662	0.769311	0.0942416	0.547427	0.0711881	0.547427	0.0710607	0.547427	0.0713156			0.614504	0.080572	0.703765	0.0910267	0.644325	0.0839043
3D plot	FALSE			0.511432	0.067371	0.572075	0.0740194	0.635151	0.0807091	0.700758	0.0874405	0.768997	0.0942139	0.557307	0.0722625	0.557307	0.0721331	0.557307	0.072392			0.602884	0.0795358	0.693262	0.0902139	0.633525	0.082939
Linear	FALSE			0.511309	0.0673474	0.571935	0.0739934	0.634993	0.0806807	0.70058	0.0874097	0.768798	0.0941805	0.567251	0.073338	0.567251	0.0732066	0.567251	0.0734695			0.591114	0.0783829	0.682278	0.0892762	0.622584	0.0818659
Data Range	AC3:AG4			0.511267	0.0673218	0.571887	0.0739651	0.634938	0.0806498	0.700519	0.087376	0.76873	0.0941442	0.577257	0.0744145	0.577257	0.0742811	0.577257	0.074548			0.579514	0.0771449	0.671029	0.088232	0.611802	0.0807142
Filled Symbols	FALSE			0.511309	0.0672961	0.571935	0.0739368	0.634993	0.0806188	0.70058	0.0873424	0.768798	0.0941079	0.587328	0.0754922	0.587328	0.0753567	0.587328	0.0756276			0.568401	0.0758555	0.659733	0.0871016	0.601472	0.0795155
ConcAge	TRUE			0.511432	0.0672725	0.572075	0.0739108	0.635151	0.0805904	0.700758	0.0873116	0.768997	0.0940745	0.597462	0.0765709	0.597462	0.0764334	0.597462	0.0767083			0.558078	0.0745498	0.64861	0.085907	0.591876	0.0783024
ConcSwap	FALSE			0.511626	0.067253	0.572296	0.0738893	0.635401	0.0805668	0.701039	0.0872859	0.769311	0.0940468	0.607662	0.0776507	0.607662	0.0775112	0.607662	0.0777901			0.548826	0.0732635	0.637876	0.0846714	0.583277	0.077108
1st Symbol-row	1			0.511876	0.0672389	0.57258	0.0738738	0.635722	0.0805499	0.7014	0.0872675	0.769714	0.0940269	0.617927	0.0787315	0.617927	0.0785901	0.617927	0.078873			0.540899	0.0720316	0.62774	0.0834189	0.575908	0.0759648
				0.51216	0.0672316	0.572904	0.0738658	0.636089	0.0805411	0.701811	0.087258	0.770174	0.0940166	0.628257	0.0798135	0.628257	0.07967	0.628257	0.079957			0.534511	0.0708878	0.618399	0.0821739	0.56997	0.0749041
				0.512456	0.0672316	0.573242	0.0738658	0.63647	0.0805411	0.70224	0.087258	0.770653	0.0940166	0.638653	0.0808965	0.638653	0.080751	0.638653	0.081042			0.529838	0.0698633	0.610036	0.0809606	0.565626	0.0739548
				0.512741	0.0672389	0.573566	0.0738738	0.636837	0.0805499	0.702651	0.0872675	0.771113	0.0940269	0.649115	0.0819807	0.649115	0.0818331	0.649115	0.0821282			0.527007	0.0689859	0.602813	0.0798025	0.562994	0.0731428
				0.51299	0.067253	0.57385	0.0738893	0.637158	0.0805668	0.703012	0.0872859	0.771516	0.0940468	0.659645	0.0830659	0.659645	0.0829163	0.659645	0.0832154			0.526095	0.0682797	0.59687	0.0787224	0.562146	0.0724902
				0.513184	0.0672725	0.574071	0.0739108	0.637408	0.0805904	0.703293	0.0873116	0.771829	0.0940745	0.670241	0.0841522	0.670241	0.0840006	0.670241	0.0843038			0.527127	0.0677639	0.592324	0.0777411	0.563105	0.0720149
				0.513307	0.0672961	0.574211	0.0739368	0.637566	0.0806188	0.703471	0.0873424	0.772028	0.0941079	0.680905	0.0852396	0.680905	0.0850859	0.680905	0.0853932			0.530074	0.0674526	0.589263	0.0768778	0.565844	0.0717297
				0.513349	0.0673218	0.574259	0.0739651	0.637621	0.0806498	0.703532	0.087376	0.772097	0.0941442	0.691638	0.086328	0.691638	0.0861724	0.691638	0.0864837			0.534857	0.0673543	0.587746	0.0761492	0.57029	0.0716425
				ConcTikEll	ConcTikEll	ConcTikEll	ConcTikEll	ConcTikEll	ConcTikEll	ConcTikEll	ConcTikEll	ConcTikEll	ConcTikEll	0.702439	0.0874176	0.702439	0.0872599	0.702439	0.0875753			0.541345	0.0674716	0.587803	0.0755697	0.57632	0.0717557
														0.713308	0.0885083	0.713308	0.0883485	0.713308	0.088668			0.549361	0.0678013	0.589433	0.0751504	0.583771	0.0720662
														0.724248	0.0896	0.724248	0.0894382	0.724248	0.0897618			0.558687	0.0683345	0.592603	0.0748994	0.592439	0.0725654
														0.735257	0.0906929	0.735257	0.090529	0.735257	0.0908567			0.569067	0.0690566	0.597254	0.0748218	0.602087	0.0732399
														0.746336	0.0917868	0.746336	0.0916209	0.746336	0.0919528			0.580219	0.0699479	0.603293	0.074919	0.612453	0.0740711
														0.757486	0.0928819	0.757486	0.0927139	0.757486	0.0930499			0.591838	0.0709841	0.610603	0.075189	0.623254	0.0750365
														0.768707	0.093978	0.768707	0.093808	0.768707	0.0941481			0.603609	0.0721369	0.619043	0.0756268	0.634194	0.0761096
														0.78	0.0950753	0.78	0.0949032	0.78	0.0952474			0.615209	0.073375	0.628447	0.0762236	0.644977	0.0772612
														0.78	0.0950753	0.78	0.0949032	0.78	0.0952474			0.626322	0.0746644	0.638633	0.076968	0.655307	0.0784599
														IsoLine	IsoLine	ConcBand	ConcBand	ConcBand	ConcBand			0.636645	0.0759701	0.649402	0.0778454	0.664902	0.0796731
																						0.645896	0.0772564	0.660545	0.0788387	0.673502	0.0808675
																						0.653824	0.0784883	0.671845	0.0799287	0.680871	0.0820106
																						0.660211	0.0796321	0.683082	0.081094	0.686808	0.0830713
																						0.664884	0.0806566	0.694038	0.0823121	0.691152	0.0840206
																						0.667715	0.0815339	0.704498	0.0835592	0.693784	0.0848327
																						0.668628	0.0822401	0.71426	0.084811	0.694632	0.0854852
																								0.723134	0.0860432	Cyan	Cyan
																								0.730946	0.0872317
																								0.737545	0.0883536
																								0.742802	0.0893868
																								0.746615	0.0903114
																								0.74891	0.0911092
																								0.749642	0.0917649

## Sheet: PlotDat4
Source sheet	all data	0.597361	0.0752599	0	0	0.217708	0.0315113	0.668628	0.0822401	0.749642	0.0917649	0.825008	0.089544	0.825165	0.099149	0.85678	0.0998114	0.801158	0.0954248	0.794357	0.0961266	0.806522	0.0960845	0.88169	0.102082	0.881154	0.101962	0.908219	0.104752	0.873775	0.106775	0.945081	0.109493	0.987608	0.107449	0.929159	0.109271	0.895097	0.103022	0.967047	0.103125	0.967824	0.109969	0.985193	0.111902	0.976635	0.111589	0.927223	0.105255
Plot name	Concordia0	0.668609	0.0838025	0.131529	0.0196543	0.482812	0.0640155	0.665638	0.0830032	0.746244	0.0926127	0.820006	0.0904428	0.821292	0.100018	0.852727	0.100894	0.798642	0.0963378	0.792631	0.0967083	0.804377	0.096864	0.876926	0.103699	0.876672	0.103457	0.903759	0.106101	0.870149	0.10736	0.940395	0.110834	0.982054	0.109366	0.924801	0.110541	0.89249	0.103916	0.962115	0.10442	0.962795	0.111702	0.980842	0.112911	0.97225	0.112722	0.924941	0.106043
Plot Type	1	0.701654	0.0888138	0.280357	0.0396948	0.805631	0.097544	0.657118	0.083139	0.736557	0.0927468	0.805416	0.0912097	0.810233	0.100068	0.841153	0.101192	0.791383	0.0969673	0.787693	0.0969973	0.798208	0.0973621	0.863294	0.104535	0.863849	0.104208	0.89101	0.10665	0.859778	0.107129	0.927007	0.111299	0.966076	0.110549	0.912359	0.110989	0.88495	0.104554	0.947763	0.105457	0.948374	0.112669	0.968396	0.113066	0.959714	0.113018	0.918373	0.106536
1st free col	233	0.732601	0.0899204	0.448761	0.0601292	1.19873	0.132129	0.643756	0.0826364	0.721366	0.0921563	0.782419	0.0917825	0.792885	0.0992965	0.822994	0.100682	0.77997	0.0972623	0.779945	0.0969701	0.788516	0.0975385	0.841897	0.104522	0.843723	0.104153	0.871006	0.106354	0.8435	0.106102	0.906002	0.110851	0.940968	0.110902	0.89284	0.11058	0.873088	0.104885	0.925153	0.106154	0.925731	0.112792	0.948864	0.112356	0.940042	0.112454	0.908051	0.106694
Sigma Level	2	0.759877	0.0912115	0.639315	0.0809653	1.67741	0.167804	0.626636	0.0815363	0.7019	0.090889	0.752879	0.0921147	0.770653	0.0977654	0.799722	0.0994042	0.765327	0.097199	0.770014	0.096629	0.776085	0.0973788	0.81447	0.103662	0.817924	0.103296	0.845367	0.105236	0.822636	0.104362	0.879082	0.109526	0.908765	0.110398	0.867826	0.109347	0.857864	0.104881	0.896117	0.106453	0.8967	0.112061	0.923828	0.110838	0.914829	0.111074	0.894811	0.106505
Absolute Errs	FALSE	0.740103	0.0928387	0.854932	0.102211	2.2603	0.204603	0.607144	0.0799276	0.679737	0.0890476	0.719189	0.0921796	0.745339	0.0955987	0.773222	0.0974629	0.74864	0.0967824	0.758705	0.0960015	0.761923	0.096896	0.783234	0.102023	0.788543	0.101708	0.81617	0.103388	0.798875	0.102049	0.848427	0.107432	0.872076	0.109077	0.839343	0.107389	0.840513	0.104544	0.863007	0.106331	0.863632	0.110535	0.895317	0.108635	0.886116	0.108991	0.879726	0.105983
Symbol Type	1	0.753001	0.0930949	1.09891	0.123874	2.97009	0.242562	0.586859	0.0779409	0.656673	0.0867812	0.684079	0.0919717	0.718992	0.0929719	0.74564	0.0950151	0.731262	0.0960463	0.746934	0.0951386	0.747176	0.0961291	0.75072	0.0997386	0.75796	0.0995167	0.78578	0.100959	0.774142	0.0993508	0.816521	0.104738	0.833872	0.107045	0.809699	0.104866	0.82244	0.103899	0.828505	0.105796	0.829208	0.108337	0.865639	0.105925	0.85623	0.106374	0.864018	0.105171
Inverse Plot	FALSE	0.754712	0.0933903	1.37498	0.145963	3.83441	0.281716	0.567425	0.0757369	0.634576	0.0842736	0.650392	0.0915081	0.693748	0.090098	0.719213	0.0922591	0.7146	0.0950504	0.735654	0.0941102	0.73304	0.0951404	0.719562	0.0969939	0.728653	0.0968998	0.75666	0.0981452	0.750441	0.0964861	0.785949	0.101663	0.79725	0.104468	0.781295	0.101981	0.805109	0.103001	0.795407	0.104894	0.796215	0.105647	0.8372	0.102928	0.827593	0.103434	0.84896	0.104134
Color Plot	TRUE	0.767456	0.0940561	1.68735	0.168486	4.8869	0.322105	0.550417	0.0734943	0.615236	0.0817278	0.620859	0.0908261	0.671651	0.0872097	0.696079	0.0894183	0.700004	0.0938752	0.72578	0.0929994	0.720659	0.0940099	0.692283	0.0940113	0.702996	0.0940692	0.731169	0.0951757	0.729692	0.093687	0.759188	0.0984548	0.765175	0.101555	0.756432	0.0989683	0.789924	0.101921	0.766394	0.103695	0.767326	0.102681	0.812303	0.0998877	0.802523	0.100409	0.835771	0.102958
3D plot	FALSE	0.773707	0.0942628	2.04082	0.191452	6.16853	0.363766	0.537212	0.0713947	0.60022	0.07935	0.59787	0.0899811	0.654493	0.084541	0.678114	0.0867228	0.688657	0.0926162	0.71811	0.0918964	0.711037	0.0928291	0.671095	0.0910323	0.683068	0.0912543	0.711372	0.0922905	0.713576	0.0911802	0.738405	0.0953744	0.740246	0.0985406	0.737125	0.0960721	0.778115	0.100746	0.743816	0.102299	0.744882	0.0996801	0.792965	0.0970491	0.783053	0.0975454	0.82552	0.101736
Linear	FALSE	0.801451	0.0962171	2.44077	0.214869	7.72917	0.40674	0.528879	0.0696083	0.590744	0.077333	0.58329	0.0890416	0.643662	0.082308	0.666773	0.0843909	0.681477	0.0913751	0.713268	0.0908905	0.704954	0.0916939	0.657714	0.0882982	0.670482	0.0886831	0.698872	0.0897234	0.703398	0.0891688	0.725285	0.092671	0.724484	0.0956699	0.724938	0.0935268	0.77064	0.0995732	0.729503	0.100817	0.730702	0.0968873	0.780753	0.0946425	0.770759	0.0950743	0.819038	0.100568
Data Range	AC3:AG114	0.78688	0.0972952	2.89333	0.238746	9.62957	0.451068	0.526095	0.0682797	0.587577	0.0758401	0.578299	0.0880836	0.640036	0.0806919	0.662975	0.0826116	0.679047	0.0902526	0.711644	0.0900632	0.702901	0.0906961	0.653223	0.0860306	0.666259	0.0865639	0.694683	0.0876824	0.699984	0.0878158	0.72089	0.0905637	0.719164	0.0931753	0.720857	0.0915388	0.768103	0.098496	0.724614	0.0993708	0.725933	0.0945288	0.776657	0.0928631	0.766638	0.0931961	0.816849	0.0995492
Filled Symbols	FALSE	0.832986	0.100028	3.40542	0.263093	11.9437	0.496793	0.529084	0.0675167	0.590974	0.0749922	0.583301	0.0871847	0.643909	0.0798233	0.667027	0.081529	0.681563	0.0893396	0.713371	0.0894815	0.705046	0.0899165	0.657987	0.0844132	0.670741	0.0850685	0.699143	0.0863328	0.70361	0.0872307	0.725576	0.0892231	0.724718	0.0912589	0.725215	0.0902691	0.77071	0.0976021	0.729545	0.0980762	0.730963	0.0927958	0.781008	0.0918548	0.771023	0.0920628	0.819131	0.0987612
ConcAge	FALSE	0.853386	0.100312	3.98486	0.287918	14.7617	0.543959	0.537605	0.0673809	0.600661	0.0748581	0.597892	0.0864179	0.654968	0.0797728	0.678602	0.0812308	0.688822	0.0887102	0.718309	0.0891926	0.711215	0.0894184	0.671619	0.083577	0.683565	0.0843179	0.711892	0.085784	0.713981	0.087461	0.738964	0.088758	0.740696	0.090076	0.737657	0.0898206	0.77825	0.096964	0.743897	0.0970385	0.745384	0.0918286	0.793453	0.0916995	0.783559	0.0917665	0.825699	0.0982681
ConcSwap	FALSE	0.825008	0.100405	4.64051	0.313231	18.1931	0.592611	0.550966	0.0678835	0.615853	0.0754487	0.620888	0.0858451	0.672316	0.0805443	0.69676	0.0817412	0.700235	0.0884151	0.726057	0.0892197	0.720907	0.089242	0.693015	0.0835897	0.703691	0.084373	0.731896	0.0860804	0.730259	0.088488	0.759969	0.0892058	0.765804	0.0897223	0.757176	0.0902295	0.790112	0.0966334	0.766507	0.0963419	0.768027	0.0917055	0.812985	0.0924096	0.803231	0.0923309	0.836022	0.0981099
1st Symbol-row	1	0.8316	0.100759	5.3824	0.339042	22.3716	0.642797	0.568087	0.0689836	0.635319	0.076716	0.650428	0.0855128	0.694548	0.0820755	0.720033	0.0830188	0.714878	0.0884785	0.735988	0.0895608	0.733338	0.0894017	0.720443	0.0844504	0.72949	0.0852293	0.757535	0.0871981	0.751123	0.0902286	0.786889	0.0905305	0.798007	0.0902266	0.78219	0.0914627	0.805336	0.0966369	0.795544	0.0960427	0.797058	0.0924366	0.838021	0.0939277	0.828444	0.0937105	0.849261	0.0982995
		0.84583	0.101248	6.22187	0.365359	27.4597	0.694563	0.587579	0.0705922	0.657481	0.0785574	0.684118	0.085448	0.719862	0.0842422	0.746533	0.0849602	0.731565	0.0888951	0.747297	0.0901883	0.747501	0.0898846	0.751679	0.0860893	0.75887	0.0868175	0.786732	0.0890464	0.774884	0.0925416	0.817544	0.0926246	0.834696	0.0915479	0.810673	0.0934204	0.822687	0.0969745	0.828654	0.0961652	0.830125	0.0939627	0.866533	0.0961308	0.857157	0.0957935	0.864346	0.0988213
		0.846879	0.102249	7.17175	0.392195	33.6556	0.747961	0.607863	0.072579	0.680546	0.0808237	0.719228	0.0856558	0.746209	0.0868689	0.774114	0.087408	0.748943	0.0896312	0.759068	0.0910512	0.762247	0.0906514	0.784193	0.0883736	0.789453	0.0890088	0.817122	0.0914756	0.799617	0.0952397	0.84945	0.0953186	0.8729	0.0935793	0.840317	0.095944	0.84076	0.0976186	0.863156	0.0966995	0.86455	0.09616	0.896211	0.0988404	0.887043	0.098411	0.880054	0.0996333
		0.880925	0.102383	8.24657	0.419557	IsoLine	IsoLine	0.627297	0.074783	0.702643	0.0833314	0.752915	0.0861195	0.771453	0.0897429	0.800542	0.0901639	0.765605	0.0906271	0.770348	0.0920796	0.776383	0.0916401	0.815351	0.0911182	0.81876	0.0916258	0.846242	0.094289	0.823319	0.0981044	0.880022	0.0983941	0.909523	0.0961561	0.868722	0.098829	0.858091	0.0985172	0.896254	0.0976022	0.897543	0.0988506	0.92465	0.101837	0.91568	0.101351	0.895112	0.10067
		0.871636	0.102392	9.46276	0.447457			0.644306	0.0770256	0.721983	0.0858772	0.782448	0.0868014	0.79355	0.0926312	0.823676	0.0930047	0.780201	0.0918022	0.780222	0.0931904	0.788764	0.0927707	0.84263	0.0941009	0.844417	0.0944564	0.871733	0.0972586	0.844068	0.100903	0.906783	0.101602	0.941598	0.0990697	0.893584	0.101842	0.873276	0.0995974	0.925267	0.0988003	0.926432	0.101816	0.949547	0.104878	0.94075	0.104376	0.908301	0.101846
		0.872036	0.102402	10.8389	0.475906			0.657511	0.0791251	0.736999	0.0882549	0.805437	0.0876464	0.810708	0.0952999	0.84164	0.0957002	0.791549	0.0930613	0.787891	0.0942934	0.798386	0.0939514	0.863818	0.0970799	0.864346	0.0972713	0.89153	0.100144	0.860183	0.10341	0.927566	0.104682	0.966526	0.102084	0.912891	0.104738	0.885085	0.100772	0.947845	0.100197	0.948875	0.104817	0.968885	0.107716	0.96022	0.107239	0.918552	0.103068
		0.879768	0.103379	12.3961	0.504914			0.665843	0.0809116	0.746474	0.090272	0.820017	0.0885859	0.821539	0.0975328	0.852981	0.0980321	0.798728	0.0943023	0.792734	0.0952993	0.804469	0.0950866	0.877199	0.099814	0.876931	0.0998425	0.90403	0.102711	0.870361	0.105422	0.940686	0.107386	0.982289	0.104955	0.925079	0.107283	0.89256	0.101945	0.962158	0.101678	0.963056	0.10761	0.981096	0.110123	0.972514	0.109711	0.925034	0.104236
		0.874404	0.103382	14.158	0.534492			0.668628	0.0822401	0.749642	0.0917649	0.825008	0.089544	0.825165	0.099149	0.85678	0.0998114	0.801158	0.0954248	0.794357	0.0961266	0.806522	0.0960845	0.88169	0.102082	0.881154	0.101962	0.908219	0.104752	0.873775	0.106775	0.945081	0.109493	0.987608	0.107449	0.929159	0.109271	0.895097	0.103022	0.967047	0.103125	0.967824	0.109969	0.985193	0.111902	0.976635	0.111589	0.927223	0.105255
		0.897503	0.103703	16.1518	0.564651			Black	Black	Black	Black	Black	Black	Black	Black	Black	Black	Black	Black	Black	Black	Black	Black	Black	Black	Black	Black	Black	Black	Black	Black	Black	Black	Black	Black	Black	Black	Black	Black	Black	Black	Black	Black	Black	Black	Black	Black	Black	Black
		0.877676	0.104592	18.4077	0.595403
		0.873838	0.104718	20.9604	0.62676
		0.884655	0.105749	23.8488	0.658732
		0.895994	0.105891	27.1171	0.691334
		0.880951	0.10626	30.8153	0.724576
		0.911239	0.107367	35	0.758471
		0.921321	0.107466	35	0.758471
		0.927157	0.107685	IsoLine	IsoLine
		0.902547	0.108656
		0.911963	0.108898
		0.914815	0.109309
		0.920722	0.109657
		0.952349	0.111463
		0.938669	0.111568
		0.950351	0.112977
		1.00359	0.115145
		0.970224	0.115155
		1.04576	0.117666
		1.0803	0.120691
		1.06633	0.120956
		1.05277	0.121702
		1.09136	0.123283
		1.14084	0.127612
		1.18502	0.130759
		1.25868	0.13511
		1.21536	0.135649
		1.27076	0.136441
		1.26134	0.137394
		1.23591	0.137513
		1.26779	0.138156
		1.2684	0.139251
		1.41846	0.14784
		1.47966	0.15557
		1.61953	0.159522
		1.70228	0.164798
		1.66377	0.167432
		1.75192	0.172791
		1.84704	0.181992
		1.84649	0.178095
		1.76424	0.168006
		1.92235	0.179111
		1.93205	0.178132
		2.51316	0.222721
		2.60344	0.225006
		2.8581	0.235781
		3.38858	0.269815
		3.37128	0.261612
		3.67472	0.277222
		3.83835	0.27424
		5.26702	0.348798
		5.57511	0.358601
		5.47914	0.347834
		5.69837	0.356518
		5.47747	0.340588
		4.94146	0.307172
		5.43103	0.335485
		6.11946	0.37612
		5.91955	0.36023
		5.25728	0.319887
		5.48978	0.333574
		5.59063	0.336685
		5.71836	0.341098
		6.1741	0.365225
		6.62552	0.389073
		6.81136	0.396364
		6.30198	0.361436
		6.83469	0.387024
		7.31917	0.41415
		6.58982	0.372519
		6.67114	0.376315
		7.10569	0.399919
		6.62674	0.371125
		6.83255	0.382169
		6.50746	0.36235
		7.09855	0.385901
		7.43735	0.402124
		7.19802	0.384043
		7.12504	0.377509
		8.18027	0.42525
		8.1364	0.394617
		9.49312	0.438272
		9.45783	0.433353
		12.2779	0.513794
		12.3381	0.515868
		11.4735	0.46876
		13.6129	0.524861
		13.4194	0.51248
		26.2092	0.674513
		IsoLine	IsoLine
[truncated: 182 more columns]

## Sheet: PlotDat5
Source sheet	all data	0.597361	0.0752599	0	0	0.217708	0.0315113	0.668628	0.0822401	0.749642	0.0917649	0.825008	0.089544	0.825165	0.099149	0.85678	0.0998114	0.801158	0.0954248	0.794357	0.0961266	0.806522	0.0960845	0.88169	0.102082	0.881154	0.101962	0.908219	0.104752	0.873775	0.106775	0.945081	0.109493	0.987608	0.107449	0.929159	0.109271	0.895097	0.103022	0.967047	0.103125	0.967824	0.109969	0.985193	0.111902	0.976635	0.111589	0.927223	0.105255
Plot name	Concordia0	0.668609	0.0838025	0.0558399	0.00859534	0.482812	0.0640155	0.665638	0.0830032	0.746244	0.0926127	0.820006	0.0904428	0.821292	0.100018	0.852727	0.100894	0.798642	0.0963378	0.792631	0.0967083	0.804377	0.096864	0.879093	0.10334	0.878711	0.103127	0.905786	0.105816	0.870149	0.10736	0.942524	0.110559	0.984589	0.108921	0.924801	0.110541	0.89249	0.103916	0.962115	0.10442	0.965085	0.11131	0.980842	0.112911	0.97225	0.112722	0.924941	0.106043
Plot Type	1	0.701654	0.0888138	0.114798	0.0172646	0.805631	0.097544	0.657118	0.083139	0.736557	0.0927468	0.805416	0.0912097	0.810233	0.100068	0.841153	0.101192	0.791383	0.0969673	0.787693	0.0969973	0.798208	0.0973621	0.871617	0.104192	0.871678	0.103905	0.898793	0.106461	0.859778	0.107129	0.93518	0.111164	0.975835	0.110016	0.912359	0.110989	0.88495	0.104554	0.947763	0.105457	0.95718	0.112255	0.968396	0.113066	0.959714	0.113018	0.918373	0.106536
1st free col	233	0.732601	0.0899204	0.177048	0.0260083	1.19873	0.132129	0.643756	0.0826364	0.721366	0.0921563	0.782419	0.0917825	0.792885	0.0992965	0.822994	0.100682	0.77997	0.0972623	0.779945	0.0969701	0.788516	0.0975385	0.859589	0.104601	0.860363	0.104262	0.887546	0.106659	0.8435	0.106102	0.923369	0.111282	0.96173	0.110687	0.89284	0.11058	0.873088	0.104885	0.925153	0.106154	0.944453	0.112762	0.948864	0.112356	0.940042	0.112454	0.908051	0.106694
Sigma Level	2	0.759877	0.0912115	0.242774	0.0348272	1.67741	0.167804	0.626636	0.0815363	0.7019	0.090889	0.752879	0.0921147	0.770653	0.0977654	0.799722	0.0994042	0.765327	0.097199	0.770014	0.096629	0.776085	0.0973788	0.843534	0.10455	0.845262	0.104182	0.872536	0.1064	0.822636	0.104362	0.907608	0.110909	0.942889	0.110905	0.867826	0.109347	0.857864	0.104881	0.896117	0.106453	0.927463	0.112811	0.923828	0.110838	0.914829	0.111074	0.894811	0.106505
Absolute Errs	FALSE	0.740103	0.0928387	0.31217	0.0437219	2.2603	0.204603	0.607144	0.0799276	0.679737	0.0890476	0.719189	0.0921796	0.745339	0.0955987	0.773222	0.0974629	0.74864	0.0967824	0.758705	0.0960015	0.761923	0.096896	0.824154	0.10404	0.827032	0.103668	0.854419	0.105696	0.798875	0.102049	0.888586	0.11006	0.920137	0.11066	0.839343	0.107389	0.840513	0.104544	0.863007	0.106331	0.90695	0.112397	0.895317	0.108635	0.886116	0.108991	0.879726	0.105983
Symbol Type	1	0.753001	0.0930949	0.385442	0.0526931	2.97009	0.242562	0.586859	0.0779409	0.656673	0.0867812	0.684079	0.0919717	0.718992	0.0929719	0.74564	0.0950151	0.731262	0.0960463	0.746934	0.0951386	0.747176	0.0961291	0.802296	0.103093	0.806473	0.102743	0.833987	0.104577	0.774142	0.0993508	0.867134	0.108773	0.894467	0.109963	0.809699	0.104866	0.82244	0.103899	0.828505	0.105796	0.883812	0.11154	0.865639	0.105925	0.85623	0.106374	0.864018	0.105171
Inverse Plot	FALSE	0.754712	0.0933903	0.462805	0.0617413	3.83441	0.281716	0.567425	0.0757369	0.634576	0.0842736	0.650392	0.0915081	0.693748	0.090098	0.719213	0.0922591	0.7146	0.0950504	0.735654	0.0941102	0.73304	0.0951404	0.778915	0.101752	0.784481	0.101447	0.812133	0.103094	0.750441	0.0964861	0.844189	0.107103	0.867002	0.108844	0.781295	0.101981	0.805109	0.103001	0.795407	0.104894	0.85906	0.110277	0.8372	0.102928	0.827593	0.103434	0.84896	0.104134
Color Plot	TRUE	0.767456	0.0940561	0.544488	0.0708673	IsoLine	IsoLine	0.550417	0.0734943	0.615236	0.0817278	0.620859	0.0908261	0.671651	0.0872097	0.696079	0.0894183	0.700004	0.0938752	0.72578	0.0929994	0.720659	0.0940099	0.755034	0.100074	0.762018	0.0998378	0.789812	0.101309	0.729692	0.093687	0.820755	0.105125	0.838942	0.107352	0.756432	0.0989683	0.789924	0.101921	0.766394	0.103695	0.833776	0.108663	0.812303	0.0998877	0.802523	0.100409	0.835771	0.102958
3D plot	FALSE	0.773707	0.0942628	0.630731	0.0800718			0.537212	0.0713947	0.60022	0.07935	0.59787	0.0899811	0.654493	0.084541	0.678114	0.0867228	0.688657	0.0926162	0.71811	0.0918964	0.711037	0.0928291	0.731696	0.0981334	0.740067	0.0979846	0.768	0.0993026	0.713576	0.0911802	0.797855	0.102923	0.811513	0.105552	0.737125	0.0960721	0.778115	0.100746	0.743816	0.102299	0.809064	0.106769	0.792965	0.0970491	0.783053	0.0975454	0.82552	0.101736
Linear	FALSE	0.801451	0.0962171	0.721791	0.0893554			0.528879	0.0696083	0.590744	0.077333	0.58329	0.0890416	0.643662	0.082308	0.666773	0.0843909	0.681477	0.0913751	0.713268	0.0908905	0.704954	0.0916939	0.70992	0.0960144	0.719585	0.0959688	0.74765	0.0971609	0.703398	0.0891688	0.77649	0.100595	0.785915	0.103523	0.724938	0.0935268	0.77064	0.0995732	0.729503	0.100817	0.786005	0.104677	0.780753	0.0946425	0.770759	0.0950743	0.819038	0.100568
Data Range	AC3:AG114	0.78688	0.0972952	0.817936	0.0987188			0.526095	0.0682797	0.587577	0.0758401	0.578299	0.0880836	0.640036	0.0806919	0.662975	0.0826116	0.679047	0.0902526	0.711644	0.0900632	0.702901	0.0906961	0.690659	0.0938099	0.701469	0.0938785	0.729652	0.094978	0.699984	0.0878158	0.757595	0.0982427	0.763265	0.101354	0.720857	0.0915388	0.768103	0.098496	0.724614	0.0993708	0.765606	0.102479	0.776657	0.0928631	0.766638	0.0931961	0.816849	0.0995492
Filled Symbols	FALSE	0.832986	0.100028	0.919449	0.108163			0.529084	0.0675167	0.590974	0.0749922	0.583301	0.0871847	0.643909	0.0798233	0.667027	0.081529	0.681563	0.0893396	0.713371	0.0894815	0.705046	0.0899165	0.674755	0.091616	0.68651	0.0918049	0.714791	0.0928493	0.70361	0.0872307	0.741995	0.095968	0.744554	0.0991397	0.725215	0.0902691	0.77071	0.0976021	0.729545	0.0980762	0.748759	0.100271	0.781008	0.0918548	0.771023	0.0920628	0.819131	0.0987612
ConcAge	FALSE	0.853386	0.100312	1.02663	0.117688			0.537605	0.0673809	0.600661	0.0748581	0.597892	0.0864179	0.654968	0.0797728	0.678602	0.0812308	0.688822	0.0887102	0.718309	0.0891926	0.711215	0.0894184	0.662902	0.0895288	0.675362	0.0898387	0.703718	0.0908677	0.713981	0.087461	0.730371	0.0938708	0.730599	0.0969764	0.737657	0.0898206	0.77825	0.096964	0.743897	0.0970385	0.736201	0.0981497	0.793453	0.0916995	0.783559	0.0917665	0.825699	0.0982681
ConcSwap	FALSE	0.825008	0.100405	1.1398	0.127295			0.550966	0.0678835	0.615853	0.0754487	0.620888	0.0858451	0.672316	0.0805443	0.69676	0.0817412	0.700235	0.0884151	0.726057	0.0892197	0.720907	0.089242	0.655619	0.0876395	0.668512	0.0880659	0.696916	0.08912	0.730259	0.088488	0.723232	0.0920428	0.722011	0.0949589	0.757176	0.0902295	0.790112	0.0966334	0.766507	0.0963419	0.72848	0.0962072	0.812985	0.0924096	0.803231	0.0923309	0.836022	0.0981099
1st Symbol-row	1	0.8316	0.100759	1.25928	0.136984			0.568087	0.0689836	0.635319	0.076716	0.650428	0.0855128	0.694548	0.0820755	0.720033	0.0830188	0.714878	0.0884785	0.735988	0.0895608	0.733338	0.0894017	0.653223	0.0860306	0.666259	0.0865639	0.694683	0.0876824	0.751123	0.0902286	0.72089	0.0905637	0.719164	0.0931753	0.78219	0.0914627	0.805336	0.0966369	0.795544	0.0960427	0.725933	0.0945288	0.838021	0.0939277	0.828444	0.0937105	0.849261	0.0982995
		0.84583	0.101248	1.38544	0.146757			0.587579	0.0705922	0.657481	0.0785574	0.684118	0.085448	0.719862	0.0842422	0.746533	0.0849602	0.731565	0.0888951	0.747297	0.0901883	0.747501	0.0898846	0.65582	0.0847725	0.668703	0.0853984	0.697116	0.0866178	0.774884	0.0925416	0.723447	0.0894983	0.722184	0.0917037	0.810673	0.0934204	0.822687	0.0969745	0.828654	0.0961652	0.728673	0.0931878	0.866533	0.0961308	0.857157	0.0957935	0.864346	0.0988213
		0.846879	0.102249	1.51864	0.156614			0.607863	0.072579	0.680546	0.0808237	0.719228	0.0856558	0.746209	0.0868689	0.774114	0.087408	0.748943	0.0896312	0.759068	0.0910512	0.762247	0.0906514	0.663296	0.0839201	0.675736	0.0846204	0.704109	0.0859728	0.799617	0.0952397	0.730791	0.0888931	0.730937	0.0906083	0.840317	0.095944	0.84076	0.0976186	0.863156	0.0966995	0.736578	0.0922428	0.896211	0.0988404	0.887043	0.098411	0.880054	0.0996333
		0.880925	0.102383	1.65929	0.166555			0.627297	0.074783	0.702643	0.0833314	0.752915	0.0861195	0.771453	0.0897429	0.800542	0.0901639	0.765605	0.0906271	0.770348	0.0920796	0.776383	0.0916401	0.675324	0.0835107	0.68705	0.0842637	0.715356	0.0857755	0.823319	0.0981044	0.742602	0.0887746	0.745043	0.089937	0.868722	0.098829	0.858091	0.0985172	0.896254	0.0976022	0.749304	0.0917351	0.92465	0.101837	0.91568	0.101351	0.895112	0.10067
		0.871636	0.102392	1.80778	0.176582			0.644306	0.0770256	0.721983	0.0858772	0.782448	0.0868014	0.79355	0.0926312	0.823676	0.0930047	0.780201	0.0918022	0.780222	0.0931904	0.788764	0.0927707	0.691379	0.0835621	0.702152	0.084344	0.730367	0.0860345	0.844068	0.100903	0.758363	0.0891479	0.763883	0.0897191	0.893584	0.101842	0.873276	0.0995974	0.925267	0.0988003	0.766295	0.0916869	0.949547	0.104878	0.94075	0.104376	0.908301	0.101846
		0.872036	0.102402	1.96457	0.186695			0.657511	0.0791251	0.736999	0.0882549	0.805437	0.0876464	0.810708	0.0952999	0.84164	0.0957002	0.791549	0.0930613	0.787891	0.0942934	0.798386	0.0939514	0.710759	0.0840722	0.720381	0.0848579	0.748483	0.0867386	0.860183	0.10341	0.777385	0.0899968	0.786636	0.0899642	0.912891	0.104738	0.885085	0.100772	0.947845	0.100197	0.786807	0.0921003	0.968885	0.107716	0.96022	0.107239	0.918552	0.103068
		0.879768	0.103379	2.13011	0.196895			0.665843	0.0809116	0.746474	0.090272	0.820017	0.0885859	0.821539	0.0975328	0.852981	0.0980321	0.798728	0.0943023	0.792734	0.0952993	0.804469	0.0950866	0.732617	0.0850187	0.740941	0.0857827	0.768915	0.0878569	0.870361	0.105422	0.798837	0.0912841	0.812305	0.0906616	0.925079	0.107283	0.89256	0.101945	0.962158	0.101678	0.809945	0.0929572	0.981096	0.110123	0.972514	0.109711	0.925034	0.104236
		0.874404	0.103382	2.30489	0.207183			0.668628	0.0822401	0.749642	0.0917649	0.825008	0.089544	0.825165	0.099149	0.85678	0.0998114	0.801158	0.0954248	0.794357	0.0961266	0.806522	0.0960845	0.755998	0.0863601	0.762933	0.0870782	0.790769	0.0893406	0.873775	0.106775	0.821782	0.0929535	0.83977	0.0917808	0.929159	0.109271	0.895097	0.103022	0.967047	0.103125	0.834698	0.0942202	0.985193	0.111902	0.976635	0.111589	0.927223	0.105255
		0.897503	0.103703	2.48944	0.217559			Black	Black	Black	Black	Black	Black	Black	Black	Black	Black	Black	Black	Black	Black	Black	Black	0.779879	0.0880379	0.785395	0.0886877	0.81309	0.0911249	Black	Black	0.845217	0.0949322	0.86783	0.0932728	Black	Black	Black	Black	Black	Black	0.859982	0.0958342	Black	Black	Black	Black	Black	Black
		0.877676	0.104592	2.68428	0.228024																			0.803217	0.0899787	0.807347	0.0905409	0.834902	0.0931317			0.868116	0.0971336	0.895259	0.0950725							0.884694	0.0977284
		0.873838	0.104718	2.89001	0.23858																			0.824993	0.0920977	0.827829	0.0925567	0.855252	0.0952733			0.889481	0.0994615	0.920858	0.0971012							0.907753	0.0998202
		0.884655	0.105749	3.10723	0.249226																			0.844254	0.0943023	0.845945	0.0946471	0.873251	0.0974562			0.908376	0.101814	0.943508	0.0992702							0.928152	0.102018
		0.895994	0.105891	3.33658	0.259963																			0.860158	0.0964961	0.860904	0.0967207	0.888111	0.0995849			0.923977	0.104089	0.962219	0.101485							0.944998	0.104226
		0.880951	0.10626	3.57873	0.270793																			0.872011	0.0985833	0.872052	0.0986868	0.899184	0.101567			0.9356	0.106186	0.976174	0.103648							0.957557	0.106348
		0.911239	0.107367	3.83441	0.281716																			0.879294	0.100473	0.878902	0.10046	0.905986	0.103314			0.942739	0.108014	0.984762	0.105666							0.965278	0.10829
		0.921321	0.107466	4	0.288474																			0.88169	0.102082	0.881154	0.101962	0.908219	0.104752			0.945081	0.109493	0.987608	0.107449							0.967824	0.109969
		0.927157	0.107685	IsoLine	IsoLine																			Black	Black	Black	Black	Black	Black			Black	Black	Black	Black							Black	Black
		0.902547	0.108656
		0.911963	0.108898
		0.914815	0.109309
		0.920722	0.109657
		0.952349	0.111463
		0.938669	0.111568
		0.950351	0.112977
		1.00359	0.115145
		0.970224	0.115155
		1.04576	0.117666
		1.0803	0.120691
		1.06633	0.120956
		1.05277	0.121702
		1.09136	0.123283
		1.14084	0.127612
		1.18502	0.130759
		1.25868	0.13511
		1.21536	0.135649
		1.27076	0.136441
		1.26134	0.137394
		1.23591	0.137513
		1.26779	0.138156
		1.2684	0.139251
		1.41846	0.14784
		1.47966	0.15557
		1.61953	0.159522
		1.70228	0.164798
		1.66377	0.167432
		1.75192	0.172791
		1.84704	0.181992
		1.84649	0.178095
		1.76424	0.168006
		1.92235	0.179111
		1.93205	0.178132
		2.51316	0.222721
		2.60344	0.225006
		2.8581	0.235781
		3.38858	0.269815
		3.37128	0.261612
		3.67472	0.277222
		3.83835	0.27424
		5.26702	0.348798
		5.57511	0.358601
		5.47914	0.347834
		5.69837	0.356518
		5.47747	0.340588
		4.94146	0.307172
		5.43103	0.335485
		6.11946	0.37612
		5.91955	0.36023
		5.25728	0.319887
		5.48978	0.333574
		5.59063	0.336685
		5.71836	0.341098
		6.1741	0.365225
		6.62552	0.389073
		6.81136	0.396364
		6.30198	0.361436
		6.83469	0.387024
		7.31917	0.41415
		6.58982	0.372519
		6.67114	0.376315
		7.10569	0.399919
		6.62674	0.371125
		6.83255	0.382169
		6.50746	0.36235
		7.09855	0.385901
		7.43735	0.402124
		7.19802	0.384043
		7.12504	0.377509
		8.18027	0.42525
		8.1364	0.394617
		9.49312	0.438272
		9.45783	0.433353
		12.2779	0.513794
		12.3381	0.515868
		11.4735	0.46876
		13.6129	0.524861
		13.4194	0.51248
		26.2092	0.674513
		IsoLine	IsoLine
[truncated: 182 more columns]

## Sheet: PlotDat6
Source sheet	all data	0.597361	0.0752599	0	0	0.103498	0.0156334	0.668628	0.0822401	0.749642	0.0917649	0.825008	0.089544	0.825165	0.099149	0.85678	0.0998114	0.801158	0.0954248	0.794357	0.0961266	0.806522	0.0960845	0.88169	0.102082	0.881154	0.101962	0.908219	0.104752	0.873775	0.106775	0.945081	0.109493	0.987608	0.107449	0.929159	0.109271	0.895097	0.103022	0.967047	0.103125	0.967824	0.109969	0.985193	0.111902	0.976635	0.111589	0.927223	0.105255
Plot name	Concordia0	0.668609	0.0838025	0.0345435	0.00536346	0.217708	0.0315113	0.666995	0.0828594	0.747786	0.0924546	0.820006	0.0904428	0.823051	0.0998642	0.854568	0.10068	0.799792	0.0961194	0.792631	0.0967083	0.804377	0.096864	0.879093	0.10334	0.878711	0.103127	0.905786	0.105816	0.870149	0.10736	0.942524	0.110559	0.984589	0.108921	0.92678	0.110279	0.89249	0.103916	0.964382	0.104095	0.965085	0.11131	0.98282	0.112723	0.974244	0.112499	0.924941	0.106043
Plot Type	1	0.701654	0.0888138	0.0702803	0.0107557	0.343738	0.0476374	0.662318	0.0831465	0.74247	0.0927662	0.805416	0.0912097	0.816984	0.100145	0.848219	0.101134	0.795818	0.0966705	0.787693	0.0969973	0.798208	0.0973621	0.871617	0.104192	0.871678	0.103905	0.898793	0.106461	0.859778	0.107129	0.93518	0.111164	0.975835	0.110016	0.919954	0.110856	0.88495	0.104554	0.956536	0.104942	0.95718	0.112255	0.975994	0.113092	0.967367	0.112968	0.918373	0.106536
1st free col	233	0.732601	0.0899204	0.107252	0.0161768	0.482812	0.0640155	0.654803	0.0830889	0.733926	0.092686	0.782419	0.0917825	0.807228	0.0999785	0.838008	0.101154	0.789408	0.0970542	0.779945	0.0969701	0.788516	0.0975385	0.859589	0.104601	0.860363	0.104262	0.887546	0.106659	0.8435	0.106102	0.923369	0.111282	0.96173	0.110687	0.908978	0.110976	0.873088	0.104885	0.943852	0.105626	0.944453	0.112762	0.965014	0.112992	0.956307	0.112974	0.908051	0.106694
Sigma Level	2	0.759877	0.0912115	0.1455	0.0216271	0.636279	0.0806498	0.644778	0.0826892	0.722527	0.0922175	0.752879	0.0921147	0.794212	0.0993726	0.824383	0.100741	0.780843	0.0972537	0.770014	0.096629	0.776085	0.0973788	0.843534	0.10455	0.845262	0.104182	0.872536	0.1064	0.822636	0.104362	0.907608	0.110909	0.942889	0.110905	0.894333	0.110634	0.857864	0.104881	0.926884	0.106119	0.927463	0.112811	0.950358	0.112429	0.941547	0.112518	0.894811	0.106505
Absolute Errs	FALSE	0.740103	0.0928387	0.18507	0.0271065	0.805631	0.097544	0.63268	0.0819648	0.708772	0.0913813	0.719189	0.0921796	0.778502	0.0983537	0.807938	0.0999102	0.770498	0.0972602	0.758705	0.0960015	0.761923	0.096896	0.824154	0.10404	0.827032	0.103668	0.854419	0.105696	0.798875	0.102049	0.888586	0.11006	0.920137	0.11066	0.876657	0.109845	0.840513	0.104544	0.906373	0.1064	0.90695	0.112397	0.932668	0.111427	0.923731	0.111619	0.879726	0.105983
Symbol Type	1	0.753001	0.0930949	0.226006	0.0326154	0.99251	0.114702	0.619038	0.0809473	0.693262	0.0902139	0.684079	0.0919717	0.760786	0.0969661	0.789393	0.0986996	0.758824	0.0970735	0.746934	0.0951386	0.747176	0.0961291	0.802296	0.103093	0.806473	0.102743	0.833987	0.104577	0.774142	0.0993508	0.867134	0.108773	0.894467	0.109963	0.856724	0.108643	0.82244	0.103899	0.883217	0.106455	0.883812	0.11154	0.912716	0.11003	0.903638	0.110317	0.864018	0.105171
Inverse Plot	FALSE	0.754712	0.0933903	0.268357	0.0381538	1.19873	0.132129	0.604449	0.0796813	0.676674	0.0887662	0.650392	0.0915081	0.741839	0.0952707	0.769558	0.0971618	0.746333	0.0967016	0.735654	0.0941102	0.73304	0.0951404	0.778915	0.101752	0.784481	0.101447	0.812133	0.103094	0.750441	0.0964861	0.844189	0.107103	0.867002	0.108844	0.835405	0.107082	0.805109	0.103001	0.858426	0.106283	0.85906	0.110277	0.891375	0.108298	0.882146	0.108669	0.84896	0.104134
Color Plot	TRUE	0.767456	0.0940561	0.31217	0.0437219	1.42629	0.149828	0.58955	0.0782221	0.659733	0.0871016	0.620859	0.0908261	0.722488	0.0933414	0.7493	0.0953639	0.733568	0.096161	0.72578	0.0929994	0.720659	0.0940099	0.755034	0.100074	0.762018	0.0998378	0.789812	0.101309	0.729692	0.093687	0.820755	0.105125	0.838942	0.107352	0.813632	0.105228	0.789924	0.101921	0.833085	0.10589	0.833776	0.108663	0.869577	0.106308	0.860196	0.106746	0.835771	0.102958
3D plot	FALSE	0.773707	0.0942628	0.357497	0.0493199	1.67741	0.167804	0.574993	0.0766333	0.643181	0.0852928	0.59787	0.0899811	0.703578	0.0912626	0.729504	0.0933846	0.72109	0.0954751	0.71811	0.0918964	0.711037	0.0928291	0.731696	0.0981334	0.740067	0.0979846	0.768	0.0993026	0.713576	0.0911802	0.797855	0.102923	0.811513	0.105552	0.792356	0.103164	0.778115	0.100746	0.808301	0.105295	0.809064	0.106769	0.848275	0.104146	0.838745	0.104634	0.82552	0.101736
Linear	FALSE	0.801451	0.0962171	0.40439	0.0549478	IsoLine	IsoLine	0.561413	0.0749846	0.62774	0.0834189	0.58329	0.0890416	0.685938	0.0891251	0.711036	0.0913102	0.709442	0.0946741	0.713268	0.0908905	0.704954	0.0916939	0.70992	0.0960144	0.719585	0.0959688	0.74765	0.0971609	0.703398	0.0891688	0.77649	0.100595	0.785915	0.103523	0.772506	0.100979	0.77064	0.0995732	0.785157	0.104523	0.786005	0.104677	0.8284	0.101908	0.818732	0.102423	0.819038	0.100568
Data Range	AC3:AG114	0.78688	0.0972952	0.452903	0.060606			0.549404	0.0733479	0.614085	0.0815618	0.578299	0.0880836	0.670336	0.0870224	0.694702	0.0892316	0.699135	0.0937928	0.711644	0.0900632	0.702901	0.0906961	0.690659	0.0938099	0.701469	0.0938785	0.729652	0.094978	0.699984	0.0878158	0.757595	0.0982427	0.763265	0.101354	0.754952	0.0987689	0.768103	0.098496	0.764665	0.103607	0.765606	0.102479	0.81082	0.0996895	0.801031	0.100211	0.816849	0.0995492
Filled Symbols	FALSE	0.832986	0.100028	0.503091	0.0662945			0.539492	0.0717947	0.602813	0.0798025	0.583301	0.0871847	0.657456	0.0850463	0.681217	0.0872395	0.690618	0.0928698	0.713371	0.0894815	0.705046	0.0899165	0.674755	0.091616	0.68651	0.0918049	0.714791	0.0928493	0.70361	0.0872307	0.741995	0.095968	0.744554	0.0991397	0.740459	0.0966304	0.77071	0.0976021	0.74772	0.102589	0.748759	0.100271	0.796305	0.0975892	0.786415	0.0980939	0.819131	0.0987612
ConcAge	FALSE	0.853386	0.100312	0.555013	0.0720136			0.532108	0.0703931	0.594417	0.0782181	0.597892	0.0864179	0.64786	0.0832833	0.671169	0.085421	0.684263	0.0919455	0.718309	0.0891926	0.711215	0.0894184	0.662902	0.0895288	0.675362	0.0898387	0.703718	0.0908677	0.713981	0.087461	0.730371	0.0938708	0.730599	0.0969764	0.729661	0.0946569	0.77825	0.096964	0.735063	0.101512	0.736201	0.0981497	0.785488	0.0956984	0.775525	0.096165	0.825699	0.0982681
ConcSwap	FALSE	0.825008	0.100405	0.608729	0.0777633			0.527577	0.0692041	0.589263	0.0768778	0.620888	0.0858451	0.641967	0.0818104	0.664999	0.0838556	0.680349	0.0910602	0.726057	0.0892197	0.720907	0.089242	0.655619	0.0876395	0.668512	0.0880659	0.696916	0.08912	0.730259	0.088488	0.723232	0.0920428	0.722011	0.0949589	0.723031	0.0929347	0.790112	0.0966334	0.727247	0.100423	0.72848	0.0962072	0.778842	0.0940997	0.768835	0.0945082	0.836022	0.0981099
1st Symbol-row	1	0.8316	0.100759	0.6643	0.0835438			0.526095	0.0682797	0.587577	0.0758401	0.650428	0.0855128	0.640036	0.0806919	0.662975	0.0826116	0.679047	0.0902526	0.735988	0.0895608	0.733338	0.0894017	0.653223	0.0860306	0.666259	0.0865639	0.694683	0.0876824	0.751123	0.0902286	0.72089	0.0905637	0.719164	0.0931753	0.720857	0.0915388	0.805336	0.0966369	0.724614	0.0993708	0.725933	0.0945288	0.776657	0.0928631	0.766638	0.0931961	0.849261	0.0982995
		0.84583	0.101248	0.721791	0.0893554			0.527728	0.0676605	0.589433	0.0751504	0.684118	0.085448	0.64215	0.0799767	0.665186	0.0817435	0.680413	0.0895581	0.747297	0.0901883	0.747501	0.0898846	0.65582	0.0847725	0.668703	0.0853984	0.697116	0.0866178	0.774884	0.0925416	0.723447	0.0894983	0.722184	0.0917037	0.723236	0.0905305	0.822687	0.0969745	0.727278	0.0984003	0.728673	0.0931878	0.77903	0.0920425	0.769029	0.0922858	0.864346	0.0988213
		0.846879	0.102249	0.781268	0.0951981			0.532404	0.0673734	0.594749	0.0748388	0.719228	0.0856558	0.648218	0.0796961	0.671536	0.0812892	0.684388	0.0890069	0.759068	0.0910512	0.762247	0.0906514	0.663296	0.0839201	0.675736	0.0846204	0.704109	0.0859728	0.799617	0.0952397	0.730791	0.0888931	0.730937	0.0906083	0.730062	0.0899538	0.84076	0.0976186	0.735124	0.0975543	0.736578	0.0922428	0.785855	0.0916738	0.775906	0.0918173	0.880054	0.0996333
		0.880925	0.102383	0.842799	0.101072			0.539919	0.0674309	0.603293	0.074919	0.752915	0.0861195	0.657973	0.0798624	0.681747	0.0812686	0.690798	0.0886232	0.770348	0.0920796	0.776383	0.0916401	0.675324	0.0835107	0.68705	0.0842637	0.715356	0.0857755	0.823319	0.0981044	0.742602	0.0887746	0.745043	0.089937	0.741038	0.0898338	0.858091	0.0985172	0.747809	0.0968696	0.749304	0.0917351	0.796836	0.0917731	0.786966	0.091811	0.895112	0.10067
		0.871636	0.102392	0.906456	0.106978			0.549945	0.0678306	0.614691	0.0753874	0.782448	0.0868014	0.67099	0.0804682	0.695372	0.0816825	0.699362	0.0884238	0.780222	0.0931904	0.788764	0.0927707	0.691379	0.0835621	0.702152	0.084344	0.730367	0.0860345	0.844068	0.100903	0.758363	0.0891479	0.763883	0.0897191	0.755683	0.0901758	0.873276	0.0995974	0.764777	0.0963764	0.766295	0.0916869	0.811492	0.0923361	0.801726	0.0922671	0.908301	0.101846
		0.872036	0.102402	0.972312	0.112915			0.562043	0.0685551	0.628447	0.0762236	0.805437	0.0876464	0.686699	0.0814872	0.711816	0.0825129	0.709707	0.0884173	0.787891	0.0942934	0.798386	0.0939514	0.710759	0.0840722	0.720381	0.0848579	0.748483	0.0867386	0.860183	0.10341	0.777385	0.0899968	0.786636	0.0899642	0.773359	0.0909649	0.885085	0.100772	0.785287	0.096096	0.786807	0.0921003	0.829182	0.0933383	0.819542	0.0931657	0.918552	0.103068
		0.879768	0.103379	1.04044	0.118884			0.575684	0.0695725	0.643957	0.0773911	0.820017	0.0885859	0.704415	0.0828747	0.730361	0.0837235	0.721381	0.088604	0.792734	0.0952993	0.804469	0.0950866	0.732617	0.0850187	0.740941	0.0857827	0.768915	0.0878569	0.870361	0.105422	0.798837	0.0912841	0.812305	0.0906616	0.793292	0.0921666	0.89256	0.101945	0.808444	0.0960408	0.809945	0.0929572	0.849134	0.0947357	0.839635	0.0944676	0.925034	0.104236
		0.874404	0.103382	1.11093	0.124885			0.590273	0.0708385	0.660545	0.0788387	0.825008	0.089544	0.723362	0.0845702	0.750197	0.0852613	0.733873	0.0889758	0.794357	0.0961266	0.806522	0.0960845	0.755998	0.0863601	0.762933	0.0870782	0.790769	0.0893406	0.873775	0.106775	0.821782	0.0929535	0.83977	0.0917808	0.814611	0.0937283	0.895097	0.103022	0.833235	0.0962132	0.834698	0.0942202	0.870475	0.0964673	0.861127	0.0961159	0.927223	0.105255
		0.897503	0.103703	1.18385	0.130918			0.605172	0.0722978	0.677486	0.0805033	Black	Black	0.742713	0.0864995	0.770455	0.0870591	0.746637	0.0895165	Black	Black	Black	Black	0.779879	0.0880379	0.785395	0.0886877	0.81309	0.0911249	Black	Black	0.845217	0.0949322	0.86783	0.0932728	0.836384	0.0955818	Black	Black	0.858576	0.0966057	0.859982	0.0958342	0.892273	0.0984574	0.883077	0.0980384	Black	Black
		0.877676	0.104592	1.25928	0.136984			0.61973	0.0738865	0.694038	0.0823121			0.761623	0.0885783	0.79025	0.0890385	0.759115	0.0902023					0.803217	0.0899787	0.807347	0.0905409	0.834902	0.0931317			0.868116	0.0971336	0.895259	0.0950725	0.85766	0.0976461			0.88336	0.097201	0.884694	0.0977284	0.913575	0.100619	0.904528	0.100151
		0.873838	0.104718	1.33733	0.143082			0.633309	0.0755353	0.709479	0.084186			0.779264	0.0907158	0.808719	0.0911128	0.770763	0.0910034					0.824993	0.0920977	0.827829	0.0925567	0.855252	0.0952733			0.889481	0.0994615	0.920858	0.0971012	0.87751	0.099831			0.906504	0.0979731	0.907753	0.0998202	0.93345	0.102858	0.924541	0.102362
		0.884655	0.105749	1.41807	0.149213			0.645318	0.077172	0.723134	0.0860432			0.794865	0.0928185	0.825053	0.0931914	0.781071	0.0918846					0.844254	0.0943023	0.845945	0.0946471	0.873251	0.0974562			0.908376	0.101814	0.943508	0.0992702	0.895064	0.102041			0.926996	0.0988885	0.928152	0.102018	0.951029	0.105076	0.942242	0.104574
		0.895994	0.105891	1.50159	0.155377			0.655231	0.0787251	0.734406	0.0878024			0.807745	0.0947945	0.838538	0.0951836	0.789588	0.0928076					0.860158	0.0964961	0.860904	0.0967207	0.888111	0.0995849			0.923977	0.104089	0.962219	0.101485	0.909557	0.104179			0.943941	0.0999069	0.944998	0.104226	0.965545	0.107176	0.956858	0.106691
		0.880951	0.10626	1.58801	0.161574			0.662614	0.0801268	0.742802	0.0893868			0.817341	0.0965575	0.848585	0.0970021	0.795942	0.093732					0.872011	0.0985833	0.872052	0.0986868	0.899184	0.101567			0.9356	0.106186	0.976174	0.103648	0.920355	0.106153			0.956598	0.100984	0.957557	0.106348	0.976362	0.109067	0.967748	0.10862
		0.911239	0.107367	1.67741	0.167804			0.667146	0.0813158	0.747956	0.0907272			0.823234	0.0980305	0.854756	0.0985675	0.799856	0.0946173					0.879294	0.100473	0.878902	0.10046	0.905986	0.103314			0.942739	0.108014	0.984762	0.105666	0.926985	0.107875			0.964414	0.102072	0.965278	0.10829	0.983008	0.110666	0.974438	0.110277
		0.921321	0.107466	1.76989	0.174067			0.668628	0.0822401	0.749642	0.0917649			0.825165	0.099149	0.85678	0.0998114	0.801158	0.0954248					0.88169	0.102082	0.881154	0.101962	0.908219	0.104752			0.945081	0.109493	0.987608	0.107449	0.929159	0.109271			0.967047	0.103125	0.967824	0.109969	0.985193	0.111902	0.976635	0.111589
		0.927157	0.107685	1.8	0.176049			Black	Black	Black	Black			Black	Black	Black	Black	Black	Black					Black	Black	Black	Black	Black	Black			Black	Black	Black	Black	Black	Black			Black	Black	Black	Black	Black	Black	Black	Black
		0.902547	0.108656	IsoLine	IsoLine
		0.911963	0.108898
		0.914815	0.109309
		0.920722	0.109657
		0.952349	0.111463
		0.938669	0.111568
		0.950351	0.112977
		1.00359	0.115145
		0.970224	0.115155
		1.04576	0.117666
		1.0803	0.120691
		1.06633	0.120956
		1.05277	0.121702
		1.09136	0.123283
		1.14084	0.127612
		1.18502	0.130759
		1.25868	0.13511
		1.21536	0.135649
		1.27076	0.136441
		1.26134	0.137394
		1.23591	0.137513
		1.26779	0.138156
		1.2684	0.139251
		1.41846	0.14784
		1.47966	0.15557
		1.61953	0.159522
		1.70228	0.164798
		1.66377	0.167432
		1.75192	0.172791
		1.84704	0.181992
		1.84649	0.178095
		1.76424	0.168006
		1.92235	0.179111
		1.93205	0.178132
		2.51316	0.222721
		2.60344	0.225006
		2.8581	0.235781
		3.38858	0.269815
		3.37128	0.261612
		3.67472	0.277222
		3.83835	0.27424
		5.26702	0.348798
		5.57511	0.358601
		5.47914	0.347834
		5.69837	0.356518
		5.47747	0.340588
		4.94146	0.307172
		5.43103	0.335485
		6.11946	0.37612
		5.91955	0.36023
		5.25728	0.319887
		5.48978	0.333574
		5.59063	0.336685
		5.71836	0.341098
		6.1741	0.365225
		6.62552	0.389073
		6.81136	0.396364
		6.30198	0.361436
		6.83469	0.387024
		7.31917	0.41415
		6.58982	0.372519
		6.67114	0.376315
		7.10569	0.399919
		6.62674	0.371125
		6.83255	0.382169
		6.50746	0.36235
		7.09855	0.385901
		7.43735	0.402124
		7.19802	0.384043
		7.12504	0.377509
		8.18027	0.42525
		8.1364	0.394617
		9.49312	0.438272
		9.45783	0.433353
		12.2779	0.513794
		12.3381	0.515868
		11.4735	0.46876
		13.6129	0.524861
		13.4194	0.51248
		26.2092	0.674513
		IsoLine	IsoLine
[truncated: 182 more columns]

## Sheet: Hoja11
387.5	0	0	468.75	0	424.468	0	424.468	0
391.667	0	0	468.75	4458.12	424.468	4458.12	424.468	4458.12
391.667	1
387.5	1
387.5	0
ErrBox	ErrBox
391.667	0
395.833	0
395.833	2
391.667	2
391.667	0
ErrBox	ErrBox
395.833	0
400	0
400	2
395.833	2
395.833	0
ErrBox	ErrBox
400	0
404.167	0
404.167	15
400	15
400	0
ErrBox	ErrBox
404.167	0
408.333	0
408.333	25
404.167	25
404.167	0
ErrBox	ErrBox
408.333	0
412.5	0
412.5	35
408.333	35
408.333	0
ErrBox	ErrBox
412.5	0
416.667	0
416.667	102
412.5	102
412.5	0
ErrBox	ErrBox
416.667	0
420.833	0
420.833	132
416.667	132
416.667	0
ErrBox	ErrBox
420.833	0
425	0
425	217
420.833	217
420.833	0
ErrBox	ErrBox
425	0
429.167	0
429.167	418
425	418
425	0
ErrBox	ErrBox
429.167	0
433.333	0
433.333	587
429.167	587
429.167	0
ErrBox	ErrBox
433.333	0
437.5	0
437.5	883
433.333	883
433.333	0
ErrBox	ErrBox
437.5	0
441.667	0
441.667	1160
437.5	1160
437.5	0
ErrBox	ErrBox
441.667	0
445.833	0
445.833	1565
441.667	1565
441.667	0
ErrBox	ErrBox
445.833	0
450	0
450	2082
445.833	2082
445.833	0
ErrBox	ErrBox
450	0
454.167	0
454.167	2575
450	2575
450	0
ErrBox	ErrBox
454.167	0
458.333	0
458.333	2935
454.167	2935
454.167	0
ErrBox	ErrBox
458.333	0
462.5	0
462.5	3151
458.333	3151
458.333	0
ErrBox	ErrBox
462.5	0
466.667	0
466.667	3479
462.5	3479
462.5	0
ErrBox	ErrBox
466.667	0
470.833	0
470.833	3536
466.667	3536
466.667	0
ErrBox	ErrBox
470.833	0
475	0
475	3366
470.833	3366
470.833	0
ErrBox	ErrBox
475	0
479.167	0
479.167	3035
475	3035
475	0
ErrBox	ErrBox
479.167	0
483.333	0
483.333	2748
479.167	2748
479.167	0
ErrBox	ErrBox
483.333	0
487.5	0
487.5	2325
483.333	2325
483.333	0
ErrBox	ErrBox
487.5	0
491.667	0
491.667	1766
487.5	1766
487.5	0
ErrBox	ErrBox
491.667	0
495.833	0
495.833	1403
491.667	1403
491.667	0
ErrBox	ErrBox
495.833	0
500	0
500	975
495.833	975
495.833	0
ErrBox	ErrBox
500	0
504.167	0
504.167	659
500	659
500	0
ErrBox	ErrBox
504.167	0
508.333	0
508.333	392
504.167	392
504.167	0
ErrBox	ErrBox
508.333	0
512.5	0
512.5	204
508.333	204
508.333	0
ErrBox	ErrBox
512.5	0
516.667	0
516.667	118
512.5	118
512.5	0
ErrBox	ErrBox
516.667	0
520.833	0
520.833	61
516.667	61
516.667	0
ErrBox	ErrBox
520.833	0
525	0
525	25
520.833	25
520.833	0
ErrBox	ErrBox
525	0
529.167	0
529.167	14
525	14
525	0
ErrBox	ErrBox
529.167	0
533.333	0
533.333	5
529.167	5
529.167	0
ErrBox	ErrBox
533.333	0
537.5	0
537.5	2
533.333	2
533.333	0
ErrBox	ErrBox

## Sheet: PlotDat10
Source sheet	all data	0.597361	0.0752599	0	0	0.217708	0.0315113	0.668628	0.0822401	0.749642	0.0917649	0.825008	0.089544	0.825165	0.099149	0.85678	0.0998114	0.801158	0.0954248	0.794357	0.0961266	0.806522	0.0960845	0.88169	0.102082	0.881154	0.101962	0.908219	0.104752	0.873775	0.106775	0.945081	0.109493	0.987608	0.107449	0.929159	0.109271	0.895097	0.103022	0.967047	0.103125	0.967824	0.109969	0.985193	0.111902	0.976635	0.111589	0.927223	0.105255
Plot name	Concordia0	0.668609	0.0838025	0.131529	0.0196543	0.482812	0.0640155	0.665638	0.0830032	0.746244	0.0926127	0.820006	0.0904428	0.821292	0.100018	0.852727	0.100894	0.798642	0.0963378	0.792631	0.0967083	0.804377	0.096864	0.876926	0.103699	0.876672	0.103457	0.903759	0.106101	0.870149	0.10736	0.940395	0.110834	0.982054	0.109366	0.924801	0.110541	0.89249	0.103916	0.962115	0.10442	0.962795	0.111702	0.980842	0.112911	0.97225	0.112722	0.924941	0.106043
Plot Type	1	0.701654	0.0888138	0.280357	0.0396948	0.805631	0.097544	0.657118	0.083139	0.736557	0.0927468	0.805416	0.0912097	0.810233	0.100068	0.841153	0.101192	0.791383	0.0969673	0.787693	0.0969973	0.798208	0.0973621	0.863294	0.104535	0.863849	0.104208	0.89101	0.10665	0.859778	0.107129	0.927007	0.111299	0.966076	0.110549	0.912359	0.110989	0.88495	0.104554	0.947763	0.105457	0.948374	0.112669	0.968396	0.113066	0.959714	0.113018	0.918373	0.106536
1st free col	233	0.732601	0.0899204	0.448761	0.0601292	1.19873	0.132129	0.643756	0.0826364	0.721366	0.0921563	0.782419	0.0917825	0.792885	0.0992965	0.822994	0.100682	0.77997	0.0972623	0.779945	0.0969701	0.788516	0.0975385	0.841897	0.104522	0.843723	0.104153	0.871006	0.106354	0.8435	0.106102	0.906002	0.110851	0.940968	0.110902	0.89284	0.11058	0.873088	0.104885	0.925153	0.106154	0.925731	0.112792	0.948864	0.112356	0.940042	0.112454	0.908051	0.106694
Sigma Level	2	0.759877	0.0912115	0.639315	0.0809653	1.67741	0.167804	0.626636	0.0815363	0.7019	0.090889	0.752879	0.0921147	0.770653	0.0977654	0.799722	0.0994042	0.765327	0.097199	0.770014	0.096629	0.776085	0.0973788	0.81447	0.103662	0.817924	0.103296	0.845367	0.105236	0.822636	0.104362	0.879082	0.109526	0.908765	0.110398	0.867826	0.109347	0.857864	0.104881	0.896117	0.106453	0.8967	0.112061	0.923828	0.110838	0.914829	0.111074	0.894811	0.106505
Absolute Errs	FALSE	0.740103	0.0928387	0.854932	0.102211	2.2603	0.204603	0.607144	0.0799276	0.679737	0.0890476	0.719189	0.0921796	0.745339	0.0955987	0.773222	0.0974629	0.74864	0.0967824	0.758705	0.0960015	0.761923	0.096896	0.783234	0.102023	0.788543	0.101708	0.81617	0.103388	0.798875	0.102049	0.848427	0.107432	0.872076	0.109077	0.839343	0.107389	0.840513	0.104544	0.863007	0.106331	0.863632	0.110535	0.895317	0.108635	0.886116	0.108991	0.879726	0.105983
Symbol Type	1	0.753001	0.0930949	1.09891	0.123874	2.97009	0.242562	0.586859	0.0779409	0.656673	0.0867812	0.684079	0.0919717	0.718992	0.0929719	0.74564	0.0950151	0.731262	0.0960463	0.746934	0.0951386	0.747176	0.0961291	0.75072	0.0997386	0.75796	0.0995167	0.78578	0.100959	0.774142	0.0993508	0.816521	0.104738	0.833872	0.107045	0.809699	0.104866	0.82244	0.103899	0.828505	0.105796	0.829208	0.108337	0.865639	0.105925	0.85623	0.106374	0.864018	0.105171
Inverse Plot	FALSE	0.754712	0.0933903	1.37498	0.145963	3.83441	0.281716	0.567425	0.0757369	0.634576	0.0842736	0.650392	0.0915081	0.693748	0.090098	0.719213	0.0922591	0.7146	0.0950504	0.735654	0.0941102	0.73304	0.0951404	0.719562	0.0969939	0.728653	0.0968998	0.75666	0.0981452	0.750441	0.0964861	0.785949	0.101663	0.79725	0.104468	0.781295	0.101981	0.805109	0.103001	0.795407	0.104894	0.796215	0.105647	0.8372	0.102928	0.827593	0.103434	0.84896	0.104134
Color Plot	FALSE	0.767456	0.0940561	1.68735	0.168486	4.8869	0.322105	0.550417	0.0734943	0.615236	0.0817278	0.620859	0.0908261	0.671651	0.0872097	0.696079	0.0894183	0.700004	0.0938752	0.72578	0.0929994	0.720659	0.0940099	0.692283	0.0940113	0.702996	0.0940692	0.731169	0.0951757	0.729692	0.093687	0.759188	0.0984548	0.765175	0.101555	0.756432	0.0989683	0.789924	0.101921	0.766394	0.103695	0.767326	0.102681	0.812303	0.0998877	0.802523	0.100409	0.835771	0.102958
3D plot	FALSE	0.773707	0.0942628	2.04082	0.191452	6.16853	0.363766	0.537212	0.0713947	0.60022	0.07935	0.59787	0.0899811	0.654493	0.084541	0.678114	0.0867228	0.688657	0.0926162	0.71811	0.0918964	0.711037	0.0928291	0.671095	0.0910323	0.683068	0.0912543	0.711372	0.0922905	0.713576	0.0911802	0.738405	0.0953744	0.740246	0.0985406	0.737125	0.0960721	0.778115	0.100746	0.743816	0.102299	0.744882	0.0996801	0.792965	0.0970491	0.783053	0.0975454	0.82552	0.101736
Linear	FALSE	0.801451	0.0962171	2.44077	0.214869	7.72917	0.40674	0.528879	0.0696083	0.590744	0.077333	0.58329	0.0890416	0.643662	0.082308	0.666773	0.0843909	0.681477	0.0913751	0.713268	0.0908905	0.704954	0.0916939	0.657714	0.0882982	0.670482	0.0886831	0.698872	0.0897234	0.703398	0.0891688	0.725285	0.092671	0.724484	0.0956699	0.724938	0.0935268	0.77064	0.0995732	0.729503	0.100817	0.730702	0.0968873	0.780753	0.0946425	0.770759	0.0950743	0.819038	0.100568
Data Range	AC3:AG114	0.78688	0.0972952	2.89333	0.238746	9.62957	0.451068	0.526095	0.0682797	0.587577	0.0758401	0.578299	0.0880836	0.640036	0.0806919	0.662975	0.0826116	0.679047	0.0902526	0.711644	0.0900632	0.702901	0.0906961	0.653223	0.0860306	0.666259	0.0865639	0.694683	0.0876824	0.699984	0.0878158	0.72089	0.0905637	0.719164	0.0931753	0.720857	0.0915388	0.768103	0.098496	0.724614	0.0993708	0.725933	0.0945288	0.776657	0.0928631	0.766638	0.0931961	0.816849	0.0995492
Filled Symbols	FALSE	0.832986	0.100028	3.40542	0.263093	11.9437	0.496793	0.529084	0.0675167	0.590974	0.0749922	0.583301	0.0871847	0.643909	0.0798233	0.667027	0.081529	0.681563	0.0893396	0.713371	0.0894815	0.705046	0.0899165	0.657987	0.0844132	0.670741	0.0850685	0.699143	0.0863328	0.70361	0.0872307	0.725576	0.0892231	0.724718	0.0912589	0.725215	0.0902691	0.77071	0.0976021	0.729545	0.0980762	0.730963	0.0927958	0.781008	0.0918548	0.771023	0.0920628	0.819131	0.0987612
ConcAge	FALSE	0.853386	0.100312	3.98486	0.287918	14.7617	0.543959	0.537605	0.0673809	0.600661	0.0748581	0.597892	0.0864179	0.654968	0.0797728	0.678602	0.0812308	0.688822	0.0887102	0.718309	0.0891926	0.711215	0.0894184	0.671619	0.083577	0.683565	0.0843179	0.711892	0.085784	0.713981	0.087461	0.738964	0.088758	0.740696	0.090076	0.737657	0.0898206	0.77825	0.096964	0.743897	0.0970385	0.745384	0.0918286	0.793453	0.0916995	0.783559	0.0917665	0.825699	0.0982681
ConcSwap	FALSE	0.825008	0.100405	4.64051	0.313231	18.1931	0.592611	0.550966	0.0678835	0.615853	0.0754487	0.620888	0.0858451	0.672316	0.0805443	0.69676	0.0817412	0.700235	0.0884151	0.726057	0.0892197	0.720907	0.089242	0.693015	0.0835897	0.703691	0.084373	0.731896	0.0860804	0.730259	0.088488	0.759969	0.0892058	0.765804	0.0897223	0.757176	0.0902295	0.790112	0.0966334	0.766507	0.0963419	0.768027	0.0917055	0.812985	0.0924096	0.803231	0.0923309	0.836022	0.0981099
1st Symbol-row	1	0.8316	0.100759	5.3824	0.339042	22.3716	0.642797	0.568087	0.0689836	0.635319	0.076716	0.650428	0.0855128	0.694548	0.0820755	0.720033	0.0830188	0.714878	0.0884785	0.735988	0.0895608	0.733338	0.0894017	0.720443	0.0844504	0.72949	0.0852293	0.757535	0.0871981	0.751123	0.0902286	0.786889	0.0905305	0.798007	0.0902266	0.78219	0.0914627	0.805336	0.0966369	0.795544	0.0960427	0.797058	0.0924366	0.838021	0.0939277	0.828444	0.0937105	0.849261	0.0982995
		0.84583	0.101248	6.22187	0.365359	27.4597	0.694563	0.587579	0.0705922	0.657481	0.0785574	0.684118	0.085448	0.719862	0.0842422	0.746533	0.0849602	0.731565	0.0888951	0.747297	0.0901883	0.747501	0.0898846	0.751679	0.0860893	0.75887	0.0868175	0.786732	0.0890464	0.774884	0.0925416	0.817544	0.0926246	0.834696	0.0915479	0.810673	0.0934204	0.822687	0.0969745	0.828654	0.0961652	0.830125	0.0939627	0.866533	0.0961308	0.857157	0.0957935	0.864346	0.0988213
		0.846879	0.102249	7.17175	0.392195	33.6556	0.747961	0.607863	0.072579	0.680546	0.0808237	0.719228	0.0856558	0.746209	0.0868689	0.774114	0.087408	0.748943	0.0896312	0.759068	0.0910512	0.762247	0.0906514	0.784193	0.0883736	0.789453	0.0890088	0.817122	0.0914756	0.799617	0.0952397	0.84945	0.0953186	0.8729	0.0935793	0.840317	0.095944	0.84076	0.0976186	0.863156	0.0966995	0.86455	0.09616	0.896211	0.0988404	0.887043	0.098411	0.880054	0.0996333
		0.880925	0.102383	8.24657	0.419557	IsoLine	IsoLine	0.627297	0.074783	0.702643	0.0833314	0.752915	0.0861195	0.771453	0.0897429	0.800542	0.0901639	0.765605	0.0906271	0.770348	0.0920796	0.776383	0.0916401	0.815351	0.0911182	0.81876	0.0916258	0.846242	0.094289	0.823319	0.0981044	0.880022	0.0983941	0.909523	0.0961561	0.868722	0.098829	0.858091	0.0985172	0.896254	0.0976022	0.897543	0.0988506	0.92465	0.101837	0.91568	0.101351	0.895112	0.10067
		0.871636	0.102392	9.46276	0.447457			0.644306	0.0770256	0.721983	0.0858772	0.782448	0.0868014	0.79355	0.0926312	0.823676	0.0930047	0.780201	0.0918022	0.780222	0.0931904	0.788764	0.0927707	0.84263	0.0941009	0.844417	0.0944564	0.871733	0.0972586	0.844068	0.100903	0.906783	0.101602	0.941598	0.0990697	0.893584	0.101842	0.873276	0.0995974	0.925267	0.0988003	0.926432	0.101816	0.949547	0.104878	0.94075	0.104376	0.908301	0.101846
		0.872036	0.102402	10.8389	0.475906			0.657511	0.0791251	0.736999	0.0882549	0.805437	0.0876464	0.810708	0.0952999	0.84164	0.0957002	0.791549	0.0930613	0.787891	0.0942934	0.798386	0.0939514	0.863818	0.0970799	0.864346	0.0972713	0.89153	0.100144	0.860183	0.10341	0.927566	0.104682	0.966526	0.102084	0.912891	0.104738	0.885085	0.100772	0.947845	0.100197	0.948875	0.104817	0.968885	0.107716	0.96022	0.107239	0.918552	0.103068
		0.879768	0.103379	12.3961	0.504914			0.665843	0.0809116	0.746474	0.090272	0.820017	0.0885859	0.821539	0.0975328	0.852981	0.0980321	0.798728	0.0943023	0.792734	0.0952993	0.804469	0.0950866	0.877199	0.099814	0.876931	0.0998425	0.90403	0.102711	0.870361	0.105422	0.940686	0.107386	0.982289	0.104955	0.925079	0.107283	0.89256	0.101945	0.962158	0.101678	0.963056	0.10761	0.981096	0.110123	0.972514	0.109711	0.925034	0.104236
		0.874404	0.103382	14.158	0.534492			0.668628	0.0822401	0.749642	0.0917649	0.825008	0.089544	0.825165	0.099149	0.85678	0.0998114	0.801158	0.0954248	0.794357	0.0961266	0.806522	0.0960845	0.88169	0.102082	0.881154	0.101962	0.908219	0.104752	0.873775	0.106775	0.945081	0.109493	0.987608	0.107449	0.929159	0.109271	0.895097	0.103022	0.967047	0.103125	0.967824	0.109969	0.985193	0.111902	0.976635	0.111589	0.927223	0.105255
		0.897503	0.103703	16.1518	0.564651			Black	Black	Black	Black	Black	Black	Black	Black	Black	Black	Black	Black	Black	Black	Black	Black	Black	Black	Black	Black	Black	Black	Black	Black	Black	Black	Black	Black	Black	Black	Black	Black	Black	Black	Black	Black	Black	Black	Black	Black	Black	Black
		0.877676	0.104592	18.4077	0.595403
		0.873838	0.104718	20.9604	0.62676
		0.884655	0.105749	23.8488	0.658732
		0.895994	0.105891	27.1171	0.691334
		0.880951	0.10626	30.8153	0.724576
		0.911239	0.107367	35	0.758471
		0.921321	0.107466	35	0.758471
		0.927157	0.107685	IsoLine	IsoLine
		0.902547	0.108656
		0.911963	0.108898
		0.914815	0.109309
		0.920722	0.109657
		0.952349	0.111463
		0.938669	0.111568
		0.950351	0.112977
		1.00359	0.115145
		0.970224	0.115155
		1.04576	0.117666
		1.0803	0.120691
		1.06633	0.120956
		1.05277	0.121702
		1.09136	0.123283
		1.14084	0.127612
		1.18502	0.130759
		1.25868	0.13511
		1.21536	0.135649
		1.27076	0.136441
		1.26134	0.137394
		1.23591	0.137513
		1.26779	0.138156
		1.2684	0.139251
		1.41846	0.14784
		1.47966	0.15557
		1.61953	0.159522
		1.70228	0.164798
		1.66377	0.167432
		1.75192	0.172791
		1.84704	0.181992
		1.84649	0.178095
		1.76424	0.168006
		1.92235	0.179111
		1.93205	0.178132
		2.51316	0.222721
		2.60344	0.225006
		2.8581	0.235781
		3.38858	0.269815
		3.37128	0.261612
		3.67472	0.277222
		3.83835	0.27424
		5.26702	0.348798
		5.57511	0.358601
		5.47914	0.347834
		5.69837	0.356518
		5.47747	0.340588
		4.94146	0.307172
		5.43103	0.335485
		6.11946	0.37612
		5.91955	0.36023
		5.25728	0.319887
		5.48978	0.333574
		5.59063	0.336685
		5.71836	0.341098
		6.1741	0.365225
		6.62552	0.389073
		6.81136	0.396364
		6.30198	0.361436
		6.83469	0.387024
		7.31917	0.41415
		6.58982	0.372519
		6.67114	0.376315
		7.10569	0.399919
		6.62674	0.371125
		6.83255	0.382169
		6.50746	0.36235
		7.09855	0.385901
		7.43735	0.402124
		7.19802	0.384043
		7.12504	0.377509
		8.18027	0.42525
		8.1364	0.394617
		9.49312	0.438272
		9.45783	0.433353
		12.2779	0.513794
		12.3381	0.515868
		11.4735	0.46876
		13.6129	0.524861
		13.4194	0.51248
		26.2092	0.674513
		IsoLine	IsoLine
[truncated: 182 more columns]

## Sheet: PlotDat7
Source sheet	all data	0.597361	0.0752599	0.447683	0.06	0.482812	0.0640155	0.668628	0.0822401	0.749642	0.0917649	0.825008	0.089544	0.825165	0.099149	0.85678	0.0998114	0.801158	0.0954248	0.794357	0.0961266	0.806522	0.0960845	0.88169	0.102082	0.881154	0.101962	0.908219	0.104752	0.873775	0.106775	0.945081	0.109493	0.987608	0.107449	0.929159	0.109271	0.895097	0.103022	0.967047	0.103125	0.967824	0.109969	0.985193	0.111902	0.976635	0.111589	0.927223	0.105255
Plot name	Concordia1	0.668609	0.0838025	0.457846	0.0611736	0.557657	0.0723004	0.666995	0.0828594	0.747786	0.0924546	0.822309	0.0902132	0.823051	0.0998642	0.855384	0.10053	0.799792	0.0961194	0.793416	0.0965802	0.805355	0.0966814	0.880052	0.103107	0.879613	0.102912	0.906684	0.105626	0.871798	0.107283	0.943467	0.110371	0.985709	0.10864	0.927657	0.110102	0.893684	0.1037	0.965381	0.1039	0.966099	0.111059	0.983696	0.112587	0.975126	0.112343	0.925983	0.105859
Plot Type	1	0.701654	0.0888138	0.482812	0.0640155	0.636279	0.0806498	0.662318	0.0831465	0.74247	0.0927662	0.814336	0.0908212	0.816984	0.100145	0.851383	0.100995	0.795818	0.0966705	0.790707	0.0968816	0.801976	0.0971345	0.875343	0.103885	0.875183	0.103627	0.902278	0.106243	0.86611	0.107354	0.93884	0.110967	0.980201	0.109604	0.923356	0.110668	0.889557	0.104249	0.960454	0.104603	0.961121	0.111908	0.979396	0.112993	0.970794	0.112826	0.922385	0.106313
1st free col	19	0.732601	0.0899204	0.508205	0.0668651	0.718871	0.0890642	0.654803	0.0830889	0.733926	0.092686	0.801438	0.0913415	0.807228	0.0999785	0.844886	0.101192	0.789408	0.0970542	0.786351	0.0970174	0.79653	0.097424	0.867691	0.104396	0.867985	0.104087	0.895122	0.106587	0.856959	0.106986	0.931325	0.111265	0.971233	0.110315	0.916372	0.110954	0.882897	0.104646	0.952401	0.105214	0.953027	0.112494	0.972411	0.11311	0.963757	0.113024	0.916586	0.106595
Sigma Level	2	0.759877	0.0912115	0.534033	0.0697224	0.805631	0.097544	0.644778	0.0826892	0.722527	0.0922175	0.784179	0.0917513	0.794212	0.0993726	0.83607	0.101118	0.780843	0.0972537	0.780538	0.0969818	0.789257	0.0975372	0.857305	0.104624	0.858216	0.104278	0.885411	0.106648	0.844745	0.106194	0.921127	0.111256	0.959051	0.110753	0.906895	0.110953	0.873995	0.104873	0.941441	0.105717	0.942037	0.112801	0.962929	0.112934	0.954208	0.112932	0.90884	0.106694
Absolute Errs	FALSE	0.740103	0.0928387	0.560304	0.0725872	0.89677	0.10609	0.63268	0.0819648	0.708772	0.0913813	0.763314	0.0920328	0.778502	0.0983537	0.825176	0.100773	0.770498	0.0972602	0.77352	0.0967764	0.780475	0.0974691	0.844468	0.104564	0.846141	0.104197	0.873409	0.106425	0.830002	0.105014	0.908526	0.110941	0.943986	0.110905	0.895185	0.110663	0.863241	0.10492	0.927873	0.106099	0.928452	0.11282	0.951211	0.11247	0.942406	0.112553	0.899486	0.106606
Symbol Type	1	0.753001	0.0930949	0.587024	0.0754598	0.99251	0.114702	0.619038	0.0809473	0.693262	0.0902139	0.739754	0.0921735	0.760786	0.0969661	0.8125	0.100167	0.758824	0.0970735	0.765606	0.09641	0.770566	0.0972228	0.829531	0.104218	0.83209	0.103844	0.859445	0.105923	0.813375	0.103496	0.893864	0.110328	0.92645	0.110769	0.881561	0.110094	0.851103	0.104785	0.912066	0.106347	0.912642	0.11255	0.937576	0.111731	0.928674	0.111897	0.888932	0.106334
Inverse Plot	FALSE	0.754712	0.0933903	0.614202	0.07834	1.09308	0.123382	0.604449	0.0796813	0.676674	0.0887662	0.714528	0.0921675	0.741839	0.0952707	0.79839	0.0993174	0.746333	0.0967016	0.757142	0.0958987	0.759964	0.096809	0.8129	0.103594	0.816447	0.10323	0.843899	0.105156	0.795589	0.101707	0.877541	0.109434	0.906921	0.110348	0.866394	0.109261	0.838113	0.104475	0.894453	0.106457	0.895038	0.111999	0.922395	0.110737	0.913385	0.110981	0.87764	0.10589
Color Plot	FALSE	0.767456	0.0940561	0.641846	0.081228	1.19873	0.132129	0.58955	0.0782221	0.659733	0.0871016	0.68874	0.0920148	0.722488	0.0933414	0.783228	0.0982464	0.733568	0.096161	0.748496	0.095265	0.749133	0.0962457	0.79503	0.10271	0.799638	0.102371	0.827195	0.104145	0.777423	0.0997251	0.860003	0.108284	0.885932	0.109653	0.850098	0.108186	0.824839	0.104001	0.875514	0.106425	0.87612	0.111183	0.906083	0.109516	0.896958	0.109831	0.866103	0.105294
3D plot	FALSE	0.773707	0.0942628	0.669963	0.0841237	1.30971	0.140944	0.574993	0.0766333	0.643181	0.0852928	0.663516	0.0917223	0.703578	0.0912626	0.76743	0.0969835	0.72109	0.0954751	0.740047	0.0945363	0.738545	0.0955577	0.776407	0.10159	0.782122	0.101292	0.809789	0.102919	0.759671	0.0976372	0.841727	0.106908	0.864055	0.108703	0.833118	0.106899	0.81186	0.103387	0.855765	0.106251	0.856405	0.110123	0.889085	0.108099	0.879841	0.108478	0.854825	0.104571
Linear	FALSE	0.801451	0.0962171	0.698561	0.0870271	1.42629	0.149828	0.561413	0.0749846	0.62774	0.0834189	0.639959	0.0913026	0.685938	0.0891251	0.751426	0.0955631	0.709442	0.0946741	0.732164	0.0937447	0.728664	0.0947749	0.75754	0.100265	0.764376	0.10002	0.792155	0.101509	0.743107	0.0955343	0.823214	0.105345	0.841887	0.107524	0.815917	0.105435	0.799743	0.102657	0.835745	0.105941	0.836429	0.108848	0.871864	0.106527	0.862499	0.106959	0.844299	0.103753
Data Range	AC3:AG114	0.78688	0.0972952	0.727649	0.0899383	IsoLine	IsoLine	0.549404	0.0733479	0.614085	0.0815618	0.619099	0.0907742	0.670336	0.0870224	0.735652	0.0940241	0.699135	0.0937928	0.725192	0.0929247	0.719922	0.0939316	0.738944	0.0987698	0.746884	0.0985914	0.774775	0.0999552	0.728456	0.0935084	0.804967	0.103637	0.820033	0.106149	0.798963	0.103833	0.789019	0.101844	0.816	0.105503	0.816739	0.107393	0.854891	0.104842	0.845407	0.105316	0.834985	0.102877
Filled Symbols	FALSE	0.832986	0.100028	0.757235	0.0928574			0.539492	0.0717947	0.602813	0.0798025	0.601846	0.09016	0.657456	0.0850463	0.720539	0.0924083	0.690618	0.0928698	0.719435	0.0921121	0.7127	0.0930647	0.721126	0.0971464	0.730125	0.0970448	0.758122	0.0982993	0.716359	0.0916479	0.787484	0.10183	0.799089	0.104614	0.78272	0.102138	0.780156	0.100984	0.797069	0.104949	0.797871	0.105797	0.838627	0.103089	0.82903	0.103593	0.827291	0.101979
ConcAge	FALSE	0.853386	0.100312	0.787328	0.0957842			0.532108	0.0703931	0.594417	0.0782181	0.588956	0.0894871	0.64786	0.0832833	0.706499	0.0907599	0.684263	0.0919455	0.715145	0.0913424	0.707314	0.092212	0.704571	0.0954387	0.714554	0.0954223	0.742652	0.0965866	0.707344	0.0900343	0.771243	0.0999744	0.779625	0.102962	0.767631	0.100396	0.773542	0.100114	0.779468	0.104294	0.78034	0.104105	0.823518	0.101318	0.813816	0.101837	0.821553	0.1011
ConcSwap	FALSE	0.825008	0.100405	0.817937	0.0987189			0.527577	0.0692041	0.589263	0.0768778	0.58099	0.0887847	0.641967	0.0818104	0.693915	0.0891238	0.680349	0.0910602	0.71251	0.0906494	0.703999	0.0914108	0.689732	0.0936933	0.700596	0.0937681	0.728785	0.0948638	0.701805	0.0887381	0.756685	0.0981201	0.762174	0.101238	0.754107	0.0986537	0.769464	0.0992727	0.763677	0.103556	0.764624	0.102362	0.809974	0.0995752	0.800178	0.100096	0.81802	0.100278
1st Symbol-row	201	0.8316	0.100759	0.849069	0.101661			0.526095	0.0682797	0.587577	0.0758401	0.578299	0.0880836	0.640036	0.0806919	0.683131	0.0875447	0.679047	0.0902526	0.711644	0.0900632	0.702901	0.0906961	0.677013	0.0919577	0.688633	0.0921274	0.7169	0.0931779	0.699984	0.0878158	0.744209	0.0963179	0.74721	0.0994885	0.742516	0.0969595	0.768103	0.098496	0.750127	0.102755	0.751151	0.100617	0.798366	0.0979092	0.78849	0.0984179	0.816849	0.0995492
		0.84583	0.101248	0.880735	0.104612			0.527728	0.0676605	0.589433	0.0751504	0.580999	0.0874144	0.64215	0.0799767	0.67444	0.0860655	0.680413	0.0895581	0.712586	0.0896096	0.704068	0.0900991	0.666761	0.0902795	0.678991	0.090545	0.707322	0.091575	0.701961	0.0873078	0.734154	0.0946168	0.735143	0.0977614	0.733176	0.0953592	0.769516	0.0978181	0.739188	0.101913	0.74029	0.0989152	0.789009	0.0963652	0.77907	0.0968482	0.818089	0.0989447
		0.846879	0.102249	0.912942	0.10757			0.532404	0.0673734	0.594749	0.0748388	0.588971	0.0868063	0.648218	0.0796961	0.668079	0.0847268	0.684388	0.0890069	0.715294	0.0893082	0.707447	0.089646	0.659255	0.0887042	0.671932	0.089064	0.700312	0.0900986	0.707649	0.0872363	0.726796	0.0930634	0.726301	0.0961039	0.726341	0.0938965	0.773643	0.0972688	0.731157	0.101052	0.732336	0.0973048	0.78216	0.0949853	0.772175	0.0954297	0.821688	0.0984913
		0.880925	0.102383	0.945702	0.110536			0.539919	0.0674309	0.603293	0.074919	0.601869	0.086286	0.657973	0.0798624	0.664222	0.0835649	0.690798	0.0886232	0.71965	0.0891724	0.712893	0.0893565	0.654701	0.0872749	0.667649	0.0877248	0.69606	0.0887892	0.7168	0.0876045	0.722334	0.0917	0.720926	0.0945612	0.722197	0.0926114	0.780303	0.096872	0.726255	0.100197	0.727506	0.0958293	0.778005	0.0938072	0.767993	0.0942012	0.827486	0.0982089
		0.871636	0.102392	0.979022	0.113511			0.549945	0.0678306	0.614691	0.0753874	0.619128	0.0858762	0.67099	0.0804682	0.662975	0.0826116	0.699362	0.0884238	0.725464	0.089208	0.720166	0.0892433	0.653223	0.0860306	0.666259	0.0865639	0.694683	0.0876824	0.729014	0.0883961	0.72089	0.0905637	0.719164	0.0931753	0.720857	0.0915388	0.789205	0.0966452	0.724614	0.0993708	0.725933	0.0945288	0.776657	0.0928631	0.766638	0.0931961	0.835232	0.0981096
		0.872036	0.102402	1.01291	0.116493			0.562043	0.0685551	0.628447	0.0762236	0.639993	0.0855948	0.686699	0.0814872	0.664371	0.0818929	0.709707	0.0884173	0.732481	0.0894135	0.728949	0.0893114	0.654861	0.0850052	0.6678	0.0856131	0.696218	0.0868084	0.743757	0.0895767	0.722504	0.0896856	0.721063	0.0919842	0.722359	0.0907082	0.799959	0.0965981	0.72628	0.0985956	0.727659	0.0934389	0.778154	0.0921786	0.768147	0.0924418	0.844586	0.098198
		0.879768	0.103379	1.04738	0.119483			0.575684	0.0695725	0.643957	0.0773911	0.663553	0.085454	0.704415	0.0828747	0.668372	0.0814284	0.721381	0.088604	0.740395	0.0897798	0.738857	0.0895577	0.65957	0.0842267	0.67223	0.0848982	0.700624	0.086191	0.760384	0.0910947	0.727131	0.0890897	0.726572	0.0910202	0.72666	0.090142	0.812097	0.0967328	0.731206	0.0978928	0.732637	0.0925893	0.782453	0.0917724	0.772479	0.091959	0.85514	0.0984701
		0.874404	0.103382	1.08245	0.122481			0.590273	0.0708385	0.660545	0.0788387	0.688779	0.0854601	0.723362	0.0845702	0.674869	0.0812307	0.733873	0.0889758	0.74886	0.0902911	0.749459	0.0899715	0.667222	0.0837163	0.679428	0.0844387	0.70778	0.0858471	0.77817	0.0928836	0.734646	0.0887921	0.735539	0.0903096	0.733645	0.0898557	0.825087	0.0970436	0.73926	0.0972815	0.740731	0.0920033	0.789439	0.0916557	0.779515	0.0917607	0.866432	0.0989141
		0.897503	0.103703	1.11811	0.125487			0.605172	0.0722978	0.677486	0.0805033	0.714567	0.0856127	0.742713	0.0864995	0.683685	0.0813053	0.746637	0.0895165	0.757506	0.0909249	0.76029	0.0905348	0.677608	0.083488	0.689198	0.0842472	0.717491	0.0857861	0.796336	0.0948654	0.744844	0.088801	0.747722	0.0898719	0.743121	0.0898572	0.838361	0.0975167	0.75022	0.0967784	0.75172	0.0916966	0.79892	0.0918316	0.789065	0.0918525	0.87797	0.0995105
		0.877676	0.104592	1.15438	0.128501			0.61973	0.0738865	0.694038	0.0823121	0.739791	0.0859053	0.761623	0.0885783	0.694579	0.0816501	0.759115	0.0902023	0.765955	0.0916535	0.770878	0.0912228	0.690445	0.0835479	0.701273	0.0843289	0.729493	0.0860096	0.814089	0.0969533	0.757445	0.0891162	0.762786	0.089719	0.754831	0.0901465	0.85134	0.0981315	0.763788	0.0963972	0.765306	0.0916778	0.810639	0.0922953	0.800867	0.0922318	0.889248	0.100233
		0.873838	0.104718	1.19128	0.131524			0.633309	0.0755353	0.709479	0.084186	0.763348	0.0863249	0.779264	0.0907158	0.707254	0.0822557	0.770763	0.0910034	0.773838	0.0924451	0.780759	0.0920056	0.705382	0.0838944	0.715323	0.0846816	0.743457	0.0865115	0.830652	0.0990562	0.772108	0.089729	0.780322	0.0898551	0.768455	0.0907155	0.863456	0.0988612	0.779594	0.0961483	0.781116	0.0919474	0.824274	0.0930341	0.814599	0.0928882	0.899773	0.101051
		0.884655	0.105749	1.2288	0.134554			0.645318	0.077172	0.723134	0.0860432	0.784208	0.0868534	0.794865	0.0928185	0.721365	0.0831056	0.781071	0.0918846	0.78081	0.0932652	0.789501	0.0928489	0.722013	0.0845182	0.730967	0.0852956	0.759003	0.0872782	0.845303	0.101082	0.78843	0.0906228	0.799851	0.0902764	0.783622	0.0915489	0.87418	0.0996738	0.797207	0.0960385	0.79872	0.092498	0.839455	0.094028	0.829888	0.0938039	0.909087	0.101927
		0.895994	0.105891	1.26697	0.137593			0.655231	0.0787251	0.734406	0.0878024	0.801461	0.0874675	0.807745	0.0947945	0.736526	0.0841766	0.789588	0.0928076	0.786567	0.0940777	0.796723	0.0937158	0.739883	0.0854021	0.747776	0.0861542	0.775707	0.0882887	0.8574	0.102943	0.805969	0.0917731	0.82084	0.0909714	0.799918	0.0926238	0.883044	0.100534	0.816147	0.0960709	0.817638	0.0933145	0.855767	0.0952497	0.846315	0.0949538	0.916781	0.102825
		0.880951	0.10626	1.30579	0.140639			0.662614	0.0801268	0.742802	0.0893868	0.814352	0.0881405	0.817341	0.0965575	0.752324	0.0854396	0.795942	0.093732	0.790857	0.0948474	0.802109	0.0945685	0.758506	0.0865221	0.765292	0.087234	0.793114	0.0895155	0.866415	0.104556	0.824244	0.0931486	0.842717	0.0919213	0.816898	0.093911	0.889658	0.101404	0.835895	0.0962444	0.837353	0.0943747	0.872765	0.096666	0.863432	0.0963067	0.922519	0.103704
		0.911239	0.107367	1.34528	0.143694			0.667146	0.0813158	0.747956	0.0907272	0.822317	0.0888428	0.823234	0.0980305	0.768329	0.0868599	0.799856	0.0946173	0.793492	0.0955404	0.805424	0.0953697	0.777373	0.0878475	0.783038	0.0885055	0.810747	0.0909251	0.871954	0.105852	0.842757	0.0947118	0.864885	0.0931	0.834099	0.0953753	0.893735	0.102245	0.855915	0.0965544	0.857328	0.0956497	0.889985	0.0982383	0.880774	0.0978255	0.926052	0.104526
		0.921321	0.107466	1.38544	0.146757			0.668628	0.0822401	0.749642	0.0917649	0.825008	0.089544	0.825165	0.099149	0.784102	0.088399	0.801158	0.0954248	0.794357	0.0961266	0.806522	0.0960845	0.795969	0.0893424	0.800529	0.0899341	0.828127	0.092479	0.873775	0.106775	0.861004	0.09642	0.886739	0.0944755	0.851053	0.0969768	0.895097	0.103022	0.87566	0.0969925	0.877019	0.0971047	0.906959	0.0999236	0.897866	0.099469	0.927223	0.105255
		0.927157	0.107685	1.42629	0.149828			Black	Black	Black	Black	Black	Black	Black	Black	0.799215	0.0900147	Black	Black	Black	Black	Black	Black	0.813787	0.0909658	0.817289	0.0914807	0.84478	0.094135	Black	Black	0.878487	0.0982266	0.907684	0.0960101	0.867296	0.0986718	Black	Black	0.894591	0.0975466	0.895887	0.0987001	0.923222	0.101676	0.914243	0.101192	Black	Black
		0.902547	0.108656	1.42861	0.15											0.813255	0.0916631							0.830342	0.0926735	0.83286	0.0931033	0.860251	0.0958476			0.894729	0.100082	0.927147	0.0976622	0.882385	0.100414			0.912193	0.0982017	0.913418	0.100392	0.938332	0.103448	0.929457	0.102948
		0.911963	0.108898	IsoLine	IsoLine											0.825839	0.0932992							0.845181	0.0944189	0.846817	0.0947574	0.874117	0.0975704			0.909286	0.101937	0.944599	0.0993865	0.895909	0.102156			0.927983	0.0989399	0.929134	0.102135	0.951876	0.10519	0.943095	0.104689
		0.914815	0.109309													0.836624	0.0948784							0.8579	0.0961544	0.85878	0.0963981	0.886002	0.0992563			0.921762	0.103739	0.959562	0.101136	0.9075	0.10385			0.941533	0.099741	0.942607	0.103881	0.963484	0.106856	0.954783	0.106367
		0.920722	0.109657													0.845315	0.0963575							0.868152	0.0978327	0.868423	0.0979805	0.89558	0.100859			0.931817	0.10544	0.971629	0.102863	0.91684	0.105451			0.952473	0.100583	0.953468	0.105582	0.972841	0.1084	0.964203	0.107937
		0.952349	0.111463													0.851676	0.0976963							0.875658	0.099408	0.875482	0.0994615	0.902591	0.102336			0.939175	0.106993	0.980471	0.104521	0.923675	0.106913			0.960503	0.101444	0.961422	0.107193	0.97969	0.10978	0.971098	0.109355
		0.938669	0.111568													0.855532	0.0988581							0.880212	0.100837	0.879764	0.100801	0.906842	0.103645			0.943637	0.108357	0.985846	0.106063	0.927819	0.108199			0.965406	0.102299	0.966251	0.108668	0.983845	0.110958	0.97528	0.110584
		0.950351	0.112977													0.85678	0.0998114							0.88169	0.102082	0.881154	0.101962	0.908219	0.104752			0.945081	0.109493	0.987608	0.107449	0.929159	0.109271			0.967047	0.103125	0.967824	0.109969	0.985193	0.111902	0.976635	0.111589
		1.00359	0.115145													Black	Black							Black	Black	Black	Black	Black	Black			Black	Black	Black	Black	Black	Black			Black	Black	Black	Black	Black	Black	Black	Black
		0.970224	0.115155
		1.04576	0.117666
		1.0803	0.120691
		1.06633	0.120956
		1.05277	0.121702
		1.09136	0.123283
		1.14084	0.127612
		1.18502	0.130759
		1.25868	0.13511
		1.21536	0.135649
		1.27076	0.136441
		1.26134	0.137394
		1.23591	0.137513
		1.26779	0.138156
		1.2684	0.139251
		1.41846	0.14784
		1.47966	0.15557
		1.61953	0.159522
		1.70228	0.164798
		1.66377	0.167432
		1.75192	0.172791
		1.84704	0.181992
		1.84649	0.178095
		1.76424	0.168006
		1.92235	0.179111
		1.93205	0.178132
		2.51316	0.222721
		2.60344	0.225006
		2.8581	0.235781
		3.38858	0.269815
		3.37128	0.261612
		3.67472	0.277222
		3.83835	0.27424
		5.26702	0.348798
		5.57511	0.358601
		5.47914	0.347834
		5.69837	0.356518
		5.47747	0.340588
		4.94146	0.307172
		5.43103	0.335485
		6.11946	0.37612
		5.91955	0.36023
		5.25728	0.319887
		5.48978	0.333574
		5.59063	0.336685
		5.71836	0.341098
		6.1741	0.365225
		6.62552	0.389073
		6.81136	0.396364
		6.30198	0.361436
		6.83469	0.387024
		7.31917	0.41415
		6.58982	0.372519
		6.67114	0.376315
		7.10569	0.399919
		6.62674	0.371125
		6.83255	0.382169
		6.50746	0.36235
		7.09855	0.385901
		7.43735	0.402124
		7.19802	0.384043
		7.12504	0.377509
		8.18027	0.42525
		8.1364	0.394617
		9.49312	0.438272
		9.45783	0.433353
		12.2779	0.513794
		12.3381	0.515868
		11.4735	0.46876
		13.6129	0.524861
		13.4194	0.51248
		26.2092	0.674513
		IsoLine	IsoLine
				0.806522	0.0960845	0.88169	0.102082	0.881154	0.101962	0.908219	0.104752	0.753001	0.0930949	0.794884	0.0958794	0.75976	0.0935226
				0.805355	0.0966814	0.880052	0.103107	0.879613	0.102912	0.906684	0.105626	0.754712	0.0933903	0.794087	0.0962737	IsoLine	IsoLine
				0.801976	0.0971345	0.875343	0.103885	0.875183	0.103627	0.902278	0.106243	0.767456	0.0940561	0.791789	0.0965477
				0.79653	0.097424	0.867691	0.104396	0.867985	0.104087	0.895122	0.106587	0.773707	0.0942628	0.788091	0.0966896
				0.789257	0.0975372	0.857305	0.104624	0.858216	0.104278	0.885411	0.106648	0.801451	0.0962171	0.783156	0.096693
				0.780475	0.0974691	0.844468	0.104564	0.846141	0.104197	0.873409	0.106425	IsoLine	IsoLine	0.777197	0.0965579
				0.770566	0.0972228	0.829531	0.104218	0.83209	0.103844	0.859445	0.105923			0.770477	0.0962901
				0.759964	0.096809	0.8129	0.103594	0.816447	0.10323	0.843899	0.105156			0.763288	0.0959013
				0.749133	0.0962457	0.79503	0.10271	0.799638	0.102371	0.827195	0.104145			0.755946	0.0954086
				0.738545	0.0955577	0.776407	0.10159	0.782122	0.101292	0.809789	0.102919			0.748769	0.0948334
				0.728664	0.0947749	0.75754	0.100265	0.764376	0.10002	0.792155	0.101509			0.742073	0.094201
				0.719922	0.0939316	0.738944	0.0987698	0.746884	0.0985914	0.774775	0.0999552			0.736151	0.0935389
				0.7127	0.0930647	0.721126	0.0971464	0.730125	0.0970448	0.758122	0.0982993			0.73126	0.0928761
				0.707314	0.092212	0.704571	0.0954387	0.714554	0.0954223	0.742652	0.0965866			0.727614	0.0922416
				0.703999	0.0914108	0.689732	0.0936933	0.700596	0.0937681	0.728785	0.0948638			0.725374	0.091663
				0.702901	0.0906961	0.677013	0.0919577	0.688633	0.0921274	0.7169	0.0931779			0.724636	0.0911657
				0.704068	0.0900991	0.666761	0.0902795	0.678991	0.090545	0.707322	0.091575			0.725434	0.0907714
				0.707447	0.089646	0.659255	0.0887042	0.671932	0.089064	0.700312	0.0900986			0.727731	0.0904974
				0.712893	0.0893565	0.654701	0.0872749	0.667649	0.0877248	0.69606	0.0887892			0.731429	0.0903555
				0.720166	0.0892433	0.653223	0.0860306	0.666259	0.0865639	0.694683	0.0876824			0.736364	0.0903521
				0.728949	0.0893114	0.654861	0.0850052	0.6678	0.0856131	0.696218	0.0868084			0.742323	0.0904873
				0.738857	0.0895577	0.65957	0.0842267	0.67223	0.0848982	0.700624	0.086191			0.749043	0.0907551
				0.749459	0.0899715	0.667222	0.0837163	0.679428	0.0844387	0.70778	0.0858471			0.756232	0.0911438
				0.76029	0.0905348	0.677608	0.083488	0.689198	0.0842472	0.717491	0.0857861			0.763575	0.0916365
				0.770878	0.0912228	0.690445	0.0835479	0.701273	0.0843289	0.729493	0.0860096			0.770751	0.0922117
				0.780759	0.0920056	0.705382	0.0838944	0.715323	0.0846816	0.743457	0.0865115			0.777447	0.0928441
				0.789501	0.0928489	0.722013	0.0845182	0.730967	0.0852956	0.759003	0.0872782			0.783369	0.0935062
				0.796723	0.0937158	0.739883	0.0854021	0.747776	0.0861542	0.775707	0.0882887			0.78826	0.094169
				0.802109	0.0945685	0.758506	0.0865221	0.765292	0.087234	0.793114	0.0895155			0.791906	0.0948036
				0.805424	0.0953697	0.777373	0.0878475	0.783038	0.0885055	0.810747	0.0909251			0.794146	0.0953821
				0.806522	0.0960845	0.795969	0.0893424	0.800529	0.0899341	0.828127	0.092479			0.794884	0.0958794
				Black	Black	0.813787	0.0909658	0.817289	0.0914807	0.84478	0.094135
						0.830342	0.0926735	0.83286	0.0931033	0.860251	0.0958476
						0.845181	0.0944189	0.846817	0.0947574	0.874117	0.0975704
						0.8579	0.0961544	0.85878	0.0963981	0.886002	0.0992563
						0.868152	0.0978327	0.868423	0.0979805	0.89558	0.100859
						0.875658	0.099408	0.875482	0.0994615	0.902591	0.102336
						0.880212	0.100837	0.879764	0.100801	0.906842	0.103645
						0.88169	0.102082	0.881154	0.101962	0.908219	0.104752
						Black	Black	Black	Black	Black	Black
[truncated: 206 more columns]

[truncated: 3 more sheets: PlotDat8, PlotDat11, data table]
