# Supplementary material for: A tectonic carpet of Variscan flysch at the base of a rootless accretionary prism in northwestern Iberia: U–Pb zircon age constrains from sediments and volcanic olistoliths
Source: Copernicus journal article supplement (doi:10.5194/se-12-835-2021), 2021-04-15
Supplement: Supplementary file 5 [file se-12-835-2021-supplement.zip › SUPP TABLES/Supplementary Table 9_AD-PO-55.xls]

## Sheet: PlotDat0
Source sheet	all data	0.547115	0.071234	0	0	0.217708	0.0315113	0.591286	0.0762411	0.642083	0.0793319	0.667875	0.0819328	0.653655	0.0823852	0.680061	0.0813614	0.677064	0.0838091	0.699316	0.0843716	0.69515	0.0849133	0.739033	0.0897962	0.829336	0.0961885	0.827927	0.0968687	0.804482	0.0974451	0.828072	0.0980777	0.810232	0.0991088	0.823336	0.100088	0.842375	0.100521	0.842058	0.100262	0.863139	0.1022	0.858189	0.102246	0.896416	0.102684	0.87305	0.103465
Plot name	Concordia0	0.589216	0.0745225	0.125709	0.0188265	0.482812	0.0640155	0.589436	0.0765781	0.639865	0.0799788	0.665619	0.0825225	0.651572	0.082831	0.677326	0.0823471	0.674745	0.0845107	0.696847	0.0851409	0.692571	0.0857553	0.736012	0.090909	0.826294	0.0971314	0.825026	0.0976644	0.801732	0.0982207	0.825311	0.0987472	0.807672	0.099595	0.820475	0.10095	0.839454	0.101403	0.838929	0.101312	0.860321	0.102859	0.854869	0.103383	0.893215	0.103648	0.870059	0.104283
Plot Type	1	0.614086	0.0767854	0.267221	0.0380074	0.805631	0.097544	0.584157	0.0764822	0.633544	0.0801836	0.659189	0.0826475	0.645631	0.0828121	0.669493	0.0829112	0.668136	0.0847577	0.6898	0.0854523	0.685212	0.0861251	0.727358	0.0915564	0.817593	0.0975421	0.816736	0.0979074	0.79389	0.0984549	0.817425	0.0988587	0.800359	0.0995177	0.812314	0.101265	0.831112	0.101743	0.829985	0.101831	0.852269	0.102944	0.845373	0.103967	0.88406	0.104052	0.861521	0.104522
1st free col	209	0.603961	0.0770937	0.426523	0.0575494	1.19873	0.132129	0.575877	0.0759611	0.623631	0.0799298	0.649105	0.0822975	0.636315	0.0823298	0.657195	0.0830079	0.657772	0.0845301	0.678745	0.0852805	0.673669	0.0859928	0.713773	0.0916858	0.803939	0.0973871	0.803731	0.0975779	0.781589	0.0981287	0.805054	0.0984031	0.788885	0.0988831	0.799514	0.101007	0.818026	0.101511	0.81595	0.101776	0.839637	0.102446	0.830472	0.103951	0.869691	0.103863	0.848126	0.104161
Sigma Level	2	0.614388	0.0771426	0.60585	0.0774593	1.67741	0.167804	0.565267	0.075057	0.610931	0.079238	0.636184	0.081501	0.624378	0.0814234	0.64143	0.0826295	0.644492	0.0838464	0.664579	0.0846394	0.658878	0.085369	0.696358	0.0912868	0.786437	0.0966791	0.787064	0.0967026	0.765827	0.0972684	0.789198	0.0974174	0.774179	0.0977427	0.783111	0.100197	0.801255	0.100728	0.79796	0.101151	0.823447	0.101407	0.811371	0.103336	0.851273	0.103097	0.830961	0.103231
Absolute Errs	FALSE	0.621788	0.0788993	0.80772	0.097744	2.2603	0.204603	0.553186	0.0738433	0.596471	0.0781641	0.621473	0.0803224	0.610786	0.0801662	0.623473	0.0818065	0.629374	0.0827618	0.648448	0.083581	0.642036	0.0843044	0.676523	0.0903917	0.766507	0.0954754	0.768085	0.0953524	0.747881	0.0959438	0.771144	0.0959814	0.757434	0.0961889	0.764436	0.0988995	0.782159	0.0994554	0.777473	0.100009	0.805012	0.0999102	0.789619	0.102172	0.830298	0.101815	0.811414	0.101805
Symbol Type	1	0.640336	0.079488	1.03497	0.118411	2.97009	0.242562	0.540613	0.0724181	0.581423	0.0767952	0.606163	0.0788573	0.596642	0.0786601	0.604781	0.0806057	0.613641	0.0813644	0.631661	0.082191	0.624508	0.082885	0.655875	0.0890731	0.745762	0.0938735	0.748331	0.0936367	0.729204	0.0942622	0.752353	0.0942114	0.740004	0.0943475	0.745001	0.0972208	0.762285	0.0977976	0.75615	0.0984397	0.785824	0.0980777	0.766978	0.100554	0.808466	0.100122	0.791071	0.100001
Inverse Plot	FALSE	0.633569	0.0799267	1.29078	0.139466	3.83441	0.281716	0.528567	0.070897	0.567007	0.0752422	0.591495	0.0772243	0.583091	0.0770271	0.586867	0.0791243	0.598568	0.0797672	0.615576	0.080582	0.607715	0.081226	0.636087	0.0874377	0.725883	0.0920033	0.729403	0.0916945	0.71131	0.0923599	0.734347	0.0922509	0.723303	0.0923677	0.726379	0.0952965	0.743242	0.0958886	0.735716	0.0965718	0.767439	0.0960576	0.745281	0.0986118	0.787544	0.0981545	0.771579	0.0979644
Color Plot	TRUE	0.66649	0.0851634	1.57875	0.160918	4.8869	0.322105	0.518024	0.0694033	0.55439	0.0736309	0.578658	0.0755558	0.57123	0.0753995	0.571182	0.0774824	0.585376	0.0780997	0.601497	0.0788844	0.593016	0.0794618	0.618762	0.0856181	0.70848	0.0900161	0.712834	0.0896832	0.695648	0.0903909	0.718587	0.0902586	0.708684	0.09041	0.710081	0.0932826	0.726574	0.093883	0.717829	0.0945564	0.751345	0.0940137	0.726288	0.0965034	0.769228	0.0960719	0.754518	0.0958595
3D plot	FALSE	0.756452	0.0905606	1.90293	0.182774	6.16853	0.363766	0.509838	0.0680578	0.544594	0.0720918	0.56869	0.0739869	0.562021	0.0739091	0.558998	0.075813	0.575134	0.076497	0.590565	0.0772356	0.581602	0.0777352	0.605304	0.0837617	0.694964	0.0880731	0.699967	0.0877657	0.683487	0.0885147	0.706348	0.088396	0.697331	0.0886329	0.697426	0.0913422	0.71363	0.0919432	0.703936	0.0925566	0.738847	0.0921113	0.711535	0.0943996	0.755002	0.0940431	0.741269	0.0938572
Linear	FALSE	0.758525	0.0908409	2.26785	0.205042	7.72917	0.40674	0.504671	0.0669697	0.538413	0.0707497	0.562401	0.0726447	0.55621	0.0726768	0.551301	0.0742512	0.568672	0.075089	0.583665	0.0757694	0.574399	0.0761861	0.596803	0.0820188	0.686429	0.0863316	0.691844	0.0860973	0.675812	0.0868834	0.698621	0.086814	0.690163	0.0871803	0.68944	0.0896324	0.70546	0.0902265	0.695164	0.0907345	0.730957	0.0905048	0.70222	0.0924708	0.746019	0.0922323	0.732905	0.0921198
Data Range	AC3:AG102	0.738864	0.0915371	2.67865	0.227729	9.62957	0.451068	0.502943	0.066227	0.536349	0.0697132	0.560298	0.0716379	0.554268	0.0718023	0.548715	0.0729238	0.566513	0.0739896	0.581356	0.0746044	0.571989	0.0749401	0.593948	0.0805307	0.683568	0.0849327	0.689123	0.0848132	0.673246	0.0856291	0.696034	0.0856407	0.687761	0.08617	0.686769	0.0882919	0.702725	0.0888719	0.692223	0.0892376	0.728314	0.0893242	0.699095	0.0908733	0.743005	0.0907863	0.730106	0.0907881
Filled Symbols	FALSE	0.762053	0.0918592	3.14109	0.250842	11.9437	0.496793	0.504793	0.06589	0.538567	0.0690663	0.562553	0.0710482	0.556351	0.0713565	0.55145	0.0719381	0.568832	0.073288	0.583825	0.0738351	0.574568	0.0740981	0.596969	0.0794179	0.68661	0.0839898	0.692025	0.0840174	0.675995	0.0848534	0.698795	0.0849712	0.690321	0.0856839	0.68963	0.0874292	0.705646	0.0879892	0.695352	0.0881873	0.731132	0.0886651	0.702415	0.0897364	0.746206	0.0898223	0.733096	0.0899698
ConcAge	FALSE	0.748997	0.0926394	3.66167	0.274391	14.7617	0.543959	0.510072	0.0659859	0.544888	0.0688614	0.568984	0.0709232	0.562291	0.0713754	0.559283	0.071374	0.575441	0.073041	0.590872	0.0735237	0.581927	0.0737283	0.605623	0.0787705	0.695311	0.0835791	0.700314	0.0837745	0.683838	0.0846192	0.706681	0.0848597	0.697634	0.0857612	0.697792	0.0871142	0.713988	0.0876498	0.704296	0.0876687	0.739184	0.0885811	0.71191	0.0891523	0.755361	0.0894184	0.741635	0.0897313
ConcSwap	FALSE	0.755053	0.0941898	4.24768	0.298384	18.1931	0.592611	0.518352	0.066507	0.554801	0.0691152	0.579068	0.0712732	0.571607	0.0718577	0.571581	0.0712773	0.585805	0.0732686	0.601927	0.0736955	0.593469	0.0738606	0.619208	0.0786411	0.708965	0.0837341	0.713319	0.084104	0.696138	0.0849455	0.719052	0.0853153	0.709108	0.0863958	0.710592	0.0873725	0.727075	0.0878813	0.718332	0.0877237	0.751816	0.0890788	0.726812	0.0891683	0.76973	0.0896072	0.755029	0.090092
1st Symbol-row	1	0.77255	0.0946962	4.90736	0.322828	22.3716	0.642797	0.528963	0.0674111	0.567501	0.0698071	0.591989	0.0720697	0.583545	0.0727641	0.587347	0.0716557	0.599084	0.0739523	0.616093	0.0743366	0.608261	0.0744844	0.636623	0.0790401	0.726467	0.0844421	0.729986	0.0849793	0.7119	0.0858057	0.734908	0.086301	0.723814	0.0875362	0.726994	0.088183	0.743845	0.0886649	0.736321	0.0883479	0.768006	0.090118	0.745913	0.0897832	0.788148	0.0903734	0.772195	0.0910225
		0.767141	0.0947496	5.64997	0.347732	27.4597	0.694563	0.541043	0.0686248	0.581961	0.070881	0.6067	0.0732483	0.597136	0.0740213	0.605303	0.0724787	0.614203	0.0750369	0.632224	0.0753951	0.625102	0.075549	0.656458	0.0799352	0.746397	0.0856458	0.748965	0.0863295	0.729846	0.0871303	0.752962	0.087737	0.74056	0.08909	0.745669	0.0894802	0.762941	0.0899371	0.756808	0.0894907	0.786441	0.0916144	0.767665	0.090947	0.809122	0.0916551	0.791741	0.0924476
		0.795726	0.0957623	6.48594	0.373105	IsoLine	IsoLine	0.553616	0.07005	0.597009	0.0722498	0.62201	0.0747134	0.61128	0.0755274	0.623995	0.0736795	0.629936	0.0764343	0.649011	0.0767851	0.64263	0.0769684	0.677106	0.0812538	0.767142	0.0872477	0.768719	0.0880452	0.748523	0.0888119	0.771753	0.089507	0.757989	0.0909314	0.765105	0.0911589	0.782815	0.0915949	0.778132	0.0910596	0.805629	0.0934469	0.790306	0.0925655	0.830955	0.0933483	0.812084	0.0942517
		0.778642	0.0965597	7.42699	0.398955			0.565662	0.0715711	0.611425	0.0738028	0.636677	0.0763464	0.624832	0.0771604	0.64191	0.0751609	0.645009	0.0780315	0.665096	0.0783941	0.659424	0.0786274	0.696894	0.0828892	0.787021	0.0891179	0.787647	0.0899873	0.766417	0.0907143	0.789759	0.0914675	0.77469	0.0929112	0.783726	0.0930832	0.801858	0.0935039	0.798565	0.0929274	0.824014	0.095467	0.812002	0.0945077	0.851877	0.0953159	0.831576	0.0962887
		0.81971	0.0967352	8.48634	0.425293			0.576205	0.0730648	0.624042	0.0754142	0.649515	0.0780149	0.636692	0.078788	0.657594	0.0768028	0.658201	0.079699	0.679175	0.0800917	0.674123	0.0803916	0.714219	0.0847088	0.804424	0.0911051	0.804216	0.0919987	0.782079	0.0926833	0.805519	0.0934598	0.789309	0.0948689	0.800024	0.0950971	0.818526	0.0955095	0.816452	0.0949429	0.840108	0.097511	0.830996	0.096616	0.870192	0.0973985	0.848638	0.0983936
		0.801578	0.0971265	9.67886	0.452126			0.584392	0.0744103	0.633838	0.0769532	0.659483	0.0795839	0.645901	0.0802784	0.669778	0.0784722	0.668443	0.0813016	0.690107	0.0817404	0.685536	0.0821182	0.727677	0.0865652	0.81794	0.0930481	0.817083	0.0939162	0.79424	0.0945594	0.817758	0.0953224	0.800663	0.096646	0.812679	0.0970375	0.83147	0.0974493	0.830345	0.0969427	0.852606	0.0994133	0.845748	0.0987198	0.884418	0.0994274	0.861887	0.100396
		0.810253	0.0971373	11.0213	0.479464			0.589558	0.0754984	0.640019	0.0782954	0.665772	0.0809261	0.651712	0.0815107	0.677475	0.0800339	0.674905	0.0827097	0.697007	0.0832066	0.69274	0.0836673	0.736178	0.0883081	0.826474	0.0947896	0.825206	0.0955846	0.801915	0.0961908	0.825485	0.0969044	0.807831	0.0980986	0.820665	0.0987473	0.83964	0.099166	0.839117	0.0987648	0.860496	0.10102	0.855064	0.100649	0.893402	0.101238	0.87025	0.102133
		0.806863	0.0977295	12.5325	0.507317			0.591286	0.0762411	0.642083	0.0793319	0.667875	0.0819328	0.653655	0.0823852	0.680061	0.0813614	0.677064	0.0838091	0.699316	0.0843716	0.69515	0.0849133	0.739033	0.0897962	0.829336	0.0961885	0.827927	0.0968687	0.804482	0.0974451	0.828072	0.0980777	0.810232	0.0991088	0.823336	0.100088	0.842375	0.100521	0.842058	0.100262	0.863139	0.1022	0.858189	0.102246	0.896416	0.102684	0.87305	0.103465
		0.79242	0.0978375	14.2336	0.535695
		0.793293	0.0978667	16.1487	0.564607
		0.80574	0.098299	18.3044	0.594063
		0.805901	0.0984687	20.7311	0.624073
		0.813476	0.0985388	23.4629	0.654649
		0.82081	0.0986779	26.5382	0.6858
		0.858175	0.0997418	30	0.717538
		0.836118	0.100245	30	0.717538
		0.832415	0.100377	IsoLine	IsoLine
		0.856025	0.100527
		0.845896	0.1007
		0.830557	0.100859
		0.843705	0.101133
		0.844952	0.101139
		0.879233	0.101628
		0.830548	0.101757
		0.839368	0.101929
		0.851452	0.102392
		0.862749	0.103211
		0.900191	0.103514
		0.877883	0.103815
		0.855362	0.103998
		0.877125	0.104907
		0.889934	0.105247
		0.882284	0.105622
		0.928994	0.106128
		0.923116	0.106955
		0.887418	0.107269
		0.900829	0.108382
		0.929977	0.109118
		0.936559	0.109466
		0.935939	0.111376
		0.986744	0.112846
		0.971921	0.112885
		1.00163	0.118112
		1.06318	0.118289
		1.03353	0.119463
		1.09767	0.12381
		1.08151	0.124231
		1.15221	0.126416
		1.21528	0.129353
		1.24233	0.134182
		1.23801	0.13472
		1.22215	0.137345
		1.24225	0.137602
		1.3179	0.143459
		1.41502	0.148393
		1.38463	0.14888
		1.45104	0.15497
		1.61536	0.165904
		1.62529	0.16629
		1.88983	0.183745
		1.79486	0.170783
		2.72898	0.22047
		4.03745	0.28537
		4.36743	0.304989
		5.55507	0.347622
		5.82097	0.35837
		5.2184	0.316795
		5.42221	0.320308
		5.91812	0.347821
		6.13375	0.358308
		6.42728	0.371136
		6.58157	0.379228
		6.57031	0.37832
		7.20686	0.412228
		7.10881	0.398591
		6.44235	0.359103
		7.91694	0.43369
		8.22241	0.42844
		8.79332	0.412882
		12.0157	0.493554
		11.8763	0.473844
		12.9418	0.498511
		14.7801	0.564268
		16.393	0.549069
		22.6268	0.613934
		IsoLine	IsoLine
[truncated: 158 more columns]

## Sheet: PlotDat1
Source sheet	all data	0.547115	0.071234	0	0	0.217708	0.0315113	0.591286	0.0762411	0.642083	0.0793319	0.667875	0.0819328	0.653655	0.0823852	0.680061	0.0813614	0.677064	0.0838091	0.699316	0.0843716	0.69515	0.0849133	0.739033	0.0897962	0.829336	0.0961885	0.827927	0.0968687	0.804482	0.0974451	0.828072	0.0980777	0.810232	0.0991088	0.823336	0.100088	0.842375	0.100521	0.842058	0.100262	0.863139	0.1022	0.858189	0.102246	0.896416	0.102684	0.87305	0.103465
Plot name	Concordia0	0.589216	0.0745225	0.0558399	0.00859534	0.482812	0.0640155	0.589436	0.0765781	0.639865	0.0799788	0.665619	0.0825225	0.651572	0.082831	0.677326	0.0823471	0.674745	0.0845107	0.696847	0.0851409	0.692571	0.0857553	0.736012	0.090909	0.826294	0.0971314	0.825026	0.0976644	0.801732	0.0982207	0.825311	0.0987472	0.807672	0.099595	0.820475	0.10095	0.839454	0.101403	0.838929	0.101312	0.860321	0.102859	0.854869	0.103383	0.893215	0.103648	0.870059	0.104283
Plot Type	1	0.614086	0.0767854	0.114798	0.0172646	0.805631	0.097544	0.584157	0.0764822	0.633544	0.0801836	0.659189	0.0826475	0.645631	0.0828121	0.669493	0.0829112	0.668136	0.0847577	0.6898	0.0854523	0.685212	0.0861251	0.727358	0.0915564	0.817593	0.0975421	0.816736	0.0979074	0.79389	0.0984549	0.817425	0.0988587	0.800359	0.0995177	0.812314	0.101265	0.831112	0.101743	0.829985	0.101831	0.852269	0.102944	0.845373	0.103967	0.88406	0.104052	0.861521	0.104522
1st free col	209	0.603961	0.0770937	0.177048	0.0260083	1.19873	0.132129	0.575877	0.0759611	0.623631	0.0799298	0.649105	0.0822975	0.636315	0.0823298	0.657195	0.0830079	0.657772	0.0845301	0.678745	0.0852805	0.673669	0.0859928	0.713773	0.0916858	0.803939	0.0973871	0.803731	0.0975779	0.781589	0.0981287	0.805054	0.0984031	0.788885	0.0988831	0.799514	0.101007	0.818026	0.101511	0.81595	0.101776	0.839637	0.102446	0.830472	0.103951	0.869691	0.103863	0.848126	0.104161
Sigma Level	2	0.614388	0.0771426	0.242774	0.0348272	1.67741	0.167804	0.565267	0.075057	0.610931	0.079238	0.636184	0.081501	0.624378	0.0814234	0.64143	0.0826295	0.644492	0.0838464	0.664579	0.0846394	0.658878	0.085369	0.696358	0.0912868	0.786437	0.0966791	0.787064	0.0967026	0.765827	0.0972684	0.789198	0.0974174	0.774179	0.0977427	0.783111	0.100197	0.801255	0.100728	0.79796	0.101151	0.823447	0.101407	0.811371	0.103336	0.851273	0.103097	0.830961	0.103231
Absolute Errs	FALSE	0.621788	0.0788993	0.31217	0.0437219	2.2603	0.204603	0.553186	0.0738433	0.596471	0.0781641	0.621473	0.0803224	0.610786	0.0801662	0.623473	0.0818065	0.629374	0.0827618	0.648448	0.083581	0.642036	0.0843044	0.676523	0.0903917	0.766507	0.0954754	0.768085	0.0953524	0.747881	0.0959438	0.771144	0.0959814	0.757434	0.0961889	0.764436	0.0988995	0.782159	0.0994554	0.777473	0.100009	0.805012	0.0999102	0.789619	0.102172	0.830298	0.101815	0.811414	0.101805
Symbol Type	1	0.640336	0.079488	0.385442	0.0526931	2.97009	0.242562	0.540613	0.0724181	0.581423	0.0767952	0.606163	0.0788573	0.596642	0.0786601	0.604781	0.0806057	0.613641	0.0813644	0.631661	0.082191	0.624508	0.082885	0.655875	0.0890731	0.745762	0.0938735	0.748331	0.0936367	0.729204	0.0942622	0.752353	0.0942114	0.740004	0.0943475	0.745001	0.0972208	0.762285	0.0977976	0.75615	0.0984397	0.785824	0.0980777	0.766978	0.100554	0.808466	0.100122	0.791071	0.100001
Inverse Plot	FALSE	0.633569	0.0799267	0.462805	0.0617413	3.83441	0.281716	0.528567	0.070897	0.567007	0.0752422	0.591495	0.0772243	0.583091	0.0770271	0.586867	0.0791243	0.598568	0.0797672	0.615576	0.080582	0.607715	0.081226	0.636087	0.0874377	0.725883	0.0920033	0.729403	0.0916945	0.71131	0.0923599	0.734347	0.0922509	0.723303	0.0923677	0.726379	0.0952965	0.743242	0.0958886	0.735716	0.0965718	0.767439	0.0960576	0.745281	0.0986118	0.787544	0.0981545	0.771579	0.0979644
Color Plot	TRUE	0.66649	0.0851634	0.544488	0.0708673	IsoLine	IsoLine	0.518024	0.0694033	0.55439	0.0736309	0.578658	0.0755558	0.57123	0.0753995	0.571182	0.0774824	0.585376	0.0780997	0.601497	0.0788844	0.593016	0.0794618	0.618762	0.0856181	0.70848	0.0900161	0.712834	0.0896832	0.695648	0.0903909	0.718587	0.0902586	0.708684	0.09041	0.710081	0.0932826	0.726574	0.093883	0.717829	0.0945564	0.751345	0.0940137	0.726288	0.0965034	0.769228	0.0960719	0.754518	0.0958595
3D plot	FALSE	0.756452	0.0905606	0.630731	0.0800718			0.509838	0.0680578	0.544594	0.0720918	0.56869	0.0739869	0.562021	0.0739091	0.558998	0.075813	0.575134	0.076497	0.590565	0.0772356	0.581602	0.0777352	0.605304	0.0837617	0.694964	0.0880731	0.699967	0.0877657	0.683487	0.0885147	0.706348	0.088396	0.697331	0.0886329	0.697426	0.0913422	0.71363	0.0919432	0.703936	0.0925566	0.738847	0.0921113	0.711535	0.0943996	0.755002	0.0940431	0.741269	0.0938572
Linear	FALSE	0.758525	0.0908409	0.721791	0.0893554			0.504671	0.0669697	0.538413	0.0707497	0.562401	0.0726447	0.55621	0.0726768	0.551301	0.0742512	0.568672	0.075089	0.583665	0.0757694	0.574399	0.0761861	0.596803	0.0820188	0.686429	0.0863316	0.691844	0.0860973	0.675812	0.0868834	0.698621	0.086814	0.690163	0.0871803	0.68944	0.0896324	0.70546	0.0902265	0.695164	0.0907345	0.730957	0.0905048	0.70222	0.0924708	0.746019	0.0922323	0.732905	0.0921198
Data Range	AC3:AG102	0.738864	0.0915371	0.817936	0.0987188			0.502943	0.066227	0.536349	0.0697132	0.560298	0.0716379	0.554268	0.0718023	0.548715	0.0729238	0.566513	0.0739896	0.581356	0.0746044	0.571989	0.0749401	0.593948	0.0805307	0.683568	0.0849327	0.689123	0.0848132	0.673246	0.0856291	0.696034	0.0856407	0.687761	0.08617	0.686769	0.0882919	0.702725	0.0888719	0.692223	0.0892376	0.728314	0.0893242	0.699095	0.0908733	0.743005	0.0907863	0.730106	0.0907881
Filled Symbols	FALSE	0.762053	0.0918592	0.919449	0.108163			0.504793	0.06589	0.538567	0.0690663	0.562553	0.0710482	0.556351	0.0713565	0.55145	0.0719381	0.568832	0.073288	0.583825	0.0738351	0.574568	0.0740981	0.596969	0.0794179	0.68661	0.0839898	0.692025	0.0840174	0.675995	0.0848534	0.698795	0.0849712	0.690321	0.0856839	0.68963	0.0874292	0.705646	0.0879892	0.695352	0.0881873	0.731132	0.0886651	0.702415	0.0897364	0.746206	0.0898223	0.733096	0.0899698
ConcAge	FALSE	0.748997	0.0926394	1.02663	0.117688			0.510072	0.0659859	0.544888	0.0688614	0.568984	0.0709232	0.562291	0.0713754	0.559283	0.071374	0.575441	0.073041	0.590872	0.0735237	0.581927	0.0737283	0.605623	0.0787705	0.695311	0.0835791	0.700314	0.0837745	0.683838	0.0846192	0.706681	0.0848597	0.697634	0.0857612	0.697792	0.0871142	0.713988	0.0876498	0.704296	0.0876687	0.739184	0.0885811	0.71191	0.0891523	0.755361	0.0894184	0.741635	0.0897313
ConcSwap	FALSE	0.755053	0.0941898	1.1398	0.127295			0.518352	0.066507	0.554801	0.0691152	0.579068	0.0712732	0.571607	0.0718577	0.571581	0.0712773	0.585805	0.0732686	0.601927	0.0736955	0.593469	0.0738606	0.619208	0.0786411	0.708965	0.0837341	0.713319	0.084104	0.696138	0.0849455	0.719052	0.0853153	0.709108	0.0863958	0.710592	0.0873725	0.727075	0.0878813	0.718332	0.0877237	0.751816	0.0890788	0.726812	0.0891683	0.76973	0.0896072	0.755029	0.090092
1st Symbol-row	1	0.77255	0.0946962	1.25928	0.136984			0.528963	0.0674111	0.567501	0.0698071	0.591989	0.0720697	0.583545	0.0727641	0.587347	0.0716557	0.599084	0.0739523	0.616093	0.0743366	0.608261	0.0744844	0.636623	0.0790401	0.726467	0.0844421	0.729986	0.0849793	0.7119	0.0858057	0.734908	0.086301	0.723814	0.0875362	0.726994	0.088183	0.743845	0.0886649	0.736321	0.0883479	0.768006	0.090118	0.745913	0.0897832	0.788148	0.0903734	0.772195	0.0910225
		0.767141	0.0947496	1.38544	0.146757			0.541043	0.0686248	0.581961	0.070881	0.6067	0.0732483	0.597136	0.0740213	0.605303	0.0724787	0.614203	0.0750369	0.632224	0.0753951	0.625102	0.075549	0.656458	0.0799352	0.746397	0.0856458	0.748965	0.0863295	0.729846	0.0871303	0.752962	0.087737	0.74056	0.08909	0.745669	0.0894802	0.762941	0.0899371	0.756808	0.0894907	0.786441	0.0916144	0.767665	0.090947	0.809122	0.0916551	0.791741	0.0924476
		0.795726	0.0957623	1.51864	0.156614			0.553616	0.07005	0.597009	0.0722498	0.62201	0.0747134	0.61128	0.0755274	0.623995	0.0736795	0.629936	0.0764343	0.649011	0.0767851	0.64263	0.0769684	0.677106	0.0812538	0.767142	0.0872477	0.768719	0.0880452	0.748523	0.0888119	0.771753	0.089507	0.757989	0.0909314	0.765105	0.0911589	0.782815	0.0915949	0.778132	0.0910596	0.805629	0.0934469	0.790306	0.0925655	0.830955	0.0933483	0.812084	0.0942517
		0.778642	0.0965597	1.65929	0.166555			0.565662	0.0715711	0.611425	0.0738028	0.636677	0.0763464	0.624832	0.0771604	0.64191	0.0751609	0.645009	0.0780315	0.665096	0.0783941	0.659424	0.0786274	0.696894	0.0828892	0.787021	0.0891179	0.787647	0.0899873	0.766417	0.0907143	0.789759	0.0914675	0.77469	0.0929112	0.783726	0.0930832	0.801858	0.0935039	0.798565	0.0929274	0.824014	0.095467	0.812002	0.0945077	0.851877	0.0953159	0.831576	0.0962887
		0.81971	0.0967352	1.80778	0.176582			0.576205	0.0730648	0.624042	0.0754142	0.649515	0.0780149	0.636692	0.078788	0.657594	0.0768028	0.658201	0.079699	0.679175	0.0800917	0.674123	0.0803916	0.714219	0.0847088	0.804424	0.0911051	0.804216	0.0919987	0.782079	0.0926833	0.805519	0.0934598	0.789309	0.0948689	0.800024	0.0950971	0.818526	0.0955095	0.816452	0.0949429	0.840108	0.097511	0.830996	0.096616	0.870192	0.0973985	0.848638	0.0983936
		0.801578	0.0971265	1.96457	0.186695			0.584392	0.0744103	0.633838	0.0769532	0.659483	0.0795839	0.645901	0.0802784	0.669778	0.0784722	0.668443	0.0813016	0.690107	0.0817404	0.685536	0.0821182	0.727677	0.0865652	0.81794	0.0930481	0.817083	0.0939162	0.79424	0.0945594	0.817758	0.0953224	0.800663	0.096646	0.812679	0.0970375	0.83147	0.0974493	0.830345	0.0969427	0.852606	0.0994133	0.845748	0.0987198	0.884418	0.0994274	0.861887	0.100396
		0.810253	0.0971373	2.13011	0.196895			0.589558	0.0754984	0.640019	0.0782954	0.665772	0.0809261	0.651712	0.0815107	0.677475	0.0800339	0.674905	0.0827097	0.697007	0.0832066	0.69274	0.0836673	0.736178	0.0883081	0.826474	0.0947896	0.825206	0.0955846	0.801915	0.0961908	0.825485	0.0969044	0.807831	0.0980986	0.820665	0.0987473	0.83964	0.099166	0.839117	0.0987648	0.860496	0.10102	0.855064	0.100649	0.893402	0.101238	0.87025	0.102133
		0.806863	0.0977295	2.30489	0.207183			0.591286	0.0762411	0.642083	0.0793319	0.667875	0.0819328	0.653655	0.0823852	0.680061	0.0813614	0.677064	0.0838091	0.699316	0.0843716	0.69515	0.0849133	0.739033	0.0897962	0.829336	0.0961885	0.827927	0.0968687	0.804482	0.0974451	0.828072	0.0980777	0.810232	0.0991088	0.823336	0.100088	0.842375	0.100521	0.842058	0.100262	0.863139	0.1022	0.858189	0.102246	0.896416	0.102684	0.87305	0.103465
		0.79242	0.0978375	2.48944	0.217559
		0.793293	0.0978667	2.68428	0.228024
		0.80574	0.098299	2.89001	0.23858
		0.805901	0.0984687	3.10723	0.249226
		0.813476	0.0985388	3.33658	0.259963
		0.82081	0.0986779	3.57873	0.270793
		0.858175	0.0997418	3.83441	0.281716
		0.836118	0.100245	4	0.288474
		0.832415	0.100377	IsoLine	IsoLine
		0.856025	0.100527
		0.845896	0.1007
		0.830557	0.100859
		0.843705	0.101133
		0.844952	0.101139
		0.879233	0.101628
		0.830548	0.101757
		0.839368	0.101929
		0.851452	0.102392
		0.862749	0.103211
		0.900191	0.103514
		0.877883	0.103815
		0.855362	0.103998
		0.877125	0.104907
		0.889934	0.105247
		0.882284	0.105622
		0.928994	0.106128
		0.923116	0.106955
		0.887418	0.107269
		0.900829	0.108382
		0.929977	0.109118
		0.936559	0.109466
		0.935939	0.111376
		0.986744	0.112846
		0.971921	0.112885
		1.00163	0.118112
		1.06318	0.118289
		1.03353	0.119463
		1.09767	0.12381
		1.08151	0.124231
		1.15221	0.126416
		1.21528	0.129353
		1.24233	0.134182
		1.23801	0.13472
		1.22215	0.137345
		1.24225	0.137602
		1.3179	0.143459
		1.41502	0.148393
		1.38463	0.14888
		1.45104	0.15497
		1.61536	0.165904
		1.62529	0.16629
		1.88983	0.183745
		1.79486	0.170783
		2.72898	0.22047
		4.03745	0.28537
		4.36743	0.304989
		5.55507	0.347622
		5.82097	0.35837
		5.2184	0.316795
		5.42221	0.320308
		5.91812	0.347821
		6.13375	0.358308
		6.42728	0.371136
		6.58157	0.379228
		6.57031	0.37832
		7.20686	0.412228
		7.10881	0.398591
		6.44235	0.359103
		7.91694	0.43369
		8.22241	0.42844
		8.79332	0.412882
		12.0157	0.493554
		11.8763	0.473844
		12.9418	0.498511
		14.7801	0.564268
		16.393	0.549069
		22.6268	0.613934
		IsoLine	IsoLine
[truncated: 158 more columns]

## Sheet: PlotDat2
Source sheet	all data	0.547115	0.071234	0	0	0.103498	0.0156334	0.591286	0.0762411	0.642083	0.0793319	0.667875	0.0819328	0.653655	0.0823852	0.680061	0.0813614	0.677064	0.0838091	0.699316	0.0843716	0.69515	0.0849133	0.739033	0.0897962	0.829336	0.0961885	0.827927	0.0968687	0.804482	0.0974451	0.828072	0.0980777	0.810232	0.0991088	0.823336	0.100088	0.842375	0.100521	0.842058	0.100262	0.863139	0.1022	0.858189	0.102246	0.896416	0.102684	0.87305	0.103465
Plot name	Concordia0	0.589216	0.0745225	0.0345435	0.00536346	0.217708	0.0315113	0.589436	0.0765781	0.639865	0.0799788	0.665619	0.0825225	0.651572	0.082831	0.678571	0.0821228	0.674745	0.0845107	0.696847	0.0851409	0.693742	0.0855748	0.737387	0.0906547	0.827677	0.0969296	0.826344	0.0975044	0.80298	0.098065	0.825311	0.0987472	0.807672	0.099595	0.821774	0.100772	0.840781	0.101219	0.840351	0.101081	0.860321	0.102859	0.856378	0.103131	0.89467	0.103443	0.871418	0.10412
Plot Type	1	0.614086	0.0767854	0.0702803	0.0107557	0.343738	0.0476374	0.584157	0.0764822	0.633544	0.0801836	0.659189	0.0826475	0.645631	0.0828121	0.674276	0.0826665	0.668136	0.0847577	0.6898	0.0854523	0.689704	0.0859894	0.732642	0.0912732	0.822905	0.0973924	0.821797	0.0978489	0.798677	0.0983996	0.817425	0.0988587	0.800359	0.0995177	0.817295	0.101168	0.836204	0.101632	0.835446	0.101624	0.852269	0.102944	0.85117	0.103728	0.889649	0.103909	0.866733	0.104469
1st free col	209	0.603961	0.0770937	0.107252	0.0161768	0.482812	0.0640155	0.575877	0.0759611	0.623631	0.0799298	0.649105	0.0822975	0.636315	0.0823298	0.667364	0.0829687	0.657772	0.0845301	0.678745	0.0852805	0.683213	0.0861391	0.725006	0.0916246	0.815228	0.0975566	0.814484	0.0978871	0.791759	0.0984343	0.805054	0.0984031	0.788885	0.0988831	0.810097	0.10126	0.828845	0.101742	0.827554	0.101866	0.839637	0.102446	0.842793	0.104013	0.881571	0.104062	0.859201	0.104497
Sigma Level	2	0.614388	0.0771426	0.1455	0.0216271	0.636279	0.0806498	0.565267	0.075057	0.610931	0.079238	0.636184	0.081501	0.624378	0.0814234	0.658136	0.0830164	0.644492	0.0838464	0.664579	0.0846394	0.674552	0.0860173	0.714812	0.0916937	0.804983	0.097415	0.804726	0.0976173	0.782529	0.0981676	0.789198	0.0974174	0.774179	0.0977427	0.800492	0.101042	0.819026	0.101544	0.817023	0.101797	0.823447	0.101407	0.831611	0.103971	0.87079	0.103894	0.84915	0.104203
Absolute Errs	FALSE	0.621788	0.0788993	0.18507	0.0271065	0.805631	0.097544	0.553186	0.0738433	0.596471	0.0781641	0.621473	0.0803224	0.610786	0.0801662	0.646996	0.0828073	0.629374	0.0827618	0.648448	0.083581	0.6641	0.0856292	0.702507	0.0914774	0.792616	0.0969739	0.792948	0.0970514	0.771392	0.097611	0.771144	0.0959814	0.757434	0.0961889	0.788902	0.100525	0.807176	0.101047	0.804311	0.101421	0.805012	0.0999102	0.818115	0.103606	0.857776	0.103414	0.837021	0.1036
Symbol Type	1	0.640336	0.079488	0.226006	0.0326154	0.99251	0.114702	0.540613	0.0724181	0.581423	0.0767952	0.606163	0.0788573	0.596642	0.0786601	0.634431	0.0823507	0.613641	0.0813644	0.631661	0.082191	0.652313	0.084992	0.688627	0.0909851	0.778669	0.0962524	0.779667	0.0962141	0.758832	0.0967891	0.752353	0.0942114	0.740004	0.0943475	0.775832	0.0997311	0.793812	0.100272	0.789975	0.100752	0.785824	0.0980777	0.802893	0.102932	0.843098	0.102641	0.823342	0.102714
Inverse Plot	FALSE	0.633569	0.0799267	0.268357	0.0381538	1.19873	0.132129	0.528567	0.070897	0.567007	0.0752422	0.591495	0.0772243	0.583091	0.0770271	0.620991	0.0816664	0.598568	0.0797672	0.615576	0.080582	0.639708	0.0841334	0.67378	0.0902384	0.763751	0.0952823	0.765461	0.095142	0.7454	0.0957375	0.734347	0.0922509	0.723303	0.0923677	0.761854	0.098695	0.779519	0.099254	0.774641	0.0998215	0.767439	0.0960576	0.786612	0.10198	0.827398	0.101611	0.808712	0.101584
Color Plot	TRUE	0.66649	0.0851634	0.31217	0.0437219	1.42629	0.149828	0.518024	0.0694033	0.55439	0.0736309	0.578658	0.0755558	0.57123	0.0753995	0.607261	0.0807844	0.585376	0.0780997	0.601497	0.0788844	0.626834	0.0830909	0.658614	0.0892698	0.748514	0.0941057	0.750952	0.0938818	0.731682	0.0945024	0.718587	0.0902586	0.708684	0.09041	0.747579	0.097462	0.764922	0.0980363	0.758979	0.0986692	0.751345	0.0940137	0.769982	0.100792	0.811363	0.100367	0.79377	0.100259
3D plot	FALSE	0.756452	0.0905606	0.357497	0.0493199	1.67741	0.167804	0.509838	0.0680578	0.544594	0.0720918	0.56869	0.0739869	0.562021	0.0739091	0.593843	0.0797433	0.575134	0.076497	0.590565	0.0772356	0.614254	0.0819101	0.643793	0.0881219	0.733624	0.0927742	0.736774	0.0924888	0.718278	0.0931377	0.706348	0.088396	0.697331	0.0886329	0.733631	0.096086	0.750658	0.0966728	0.743674	0.0973456	0.738847	0.0921113	0.753731	0.0994179	0.795692	0.0989647	0.77917	0.0987968
Linear	FALSE	0.758525	0.0908409	0.40439	0.0549478	IsoLine	IsoLine	0.504671	0.0669697	0.538413	0.0707497	0.562401	0.0726447	0.55621	0.0726768	0.581323	0.0785885	0.568672	0.075089	0.583665	0.0757694	0.602519	0.0806427	0.629964	0.0868446	0.719732	0.091346	0.723546	0.0910237	0.705774	0.0917031	0.698621	0.086814	0.690163	0.0871803	0.720618	0.0946271	0.737351	0.0952228	0.729394	0.0959085	0.730957	0.0905048	0.738568	0.0979192	0.78107	0.0974648	0.765549	0.0972618
Data Range	AC3:AG102	0.738864	0.0915371	0.452903	0.060606			0.502943	0.066227	0.536349	0.0697132	0.560298	0.0716379	0.554268	0.0718023	0.570249	0.0773705	0.566513	0.0739896	0.581356	0.0746044	0.592141	0.0793439	0.617731	0.0854938	0.707444	0.0898834	0.711848	0.0895507	0.694715	0.0902611	0.696034	0.0856407	0.687761	0.08617	0.709111	0.0931491	0.725582	0.0937498	0.716764	0.0944207	0.728314	0.0893242	0.725157	0.0963611	0.768138	0.0959331	0.753502	0.0957209
Filled Symbols	FALSE	0.762053	0.0918592	0.503091	0.0662945			0.504793	0.06589	0.538567	0.0690663	0.562553	0.0710482	0.556351	0.0713565	0.561103	0.0761425	0.568832	0.073288	0.583825	0.0738351	0.583573	0.0780706	0.607629	0.0841286	0.697299	0.0884505	0.702189	0.088134	0.685587	0.088875	0.698795	0.0849712	0.690321	0.0856839	0.699612	0.0917166	0.715866	0.0923182	0.706336	0.0929474	0.731132	0.0886651	0.714083	0.0948117	0.757459	0.0944365	0.743557	0.0942414
ConcAge	FALSE	0.748997	0.0926394	0.555013	0.0720136			0.510072	0.0659859	0.544888	0.0688614	0.568984	0.0709232	0.562291	0.0713754	0.554286	0.0749583	0.575441	0.073041	0.590872	0.0735237	0.577191	0.0768785	0.600099	0.0828087	0.689738	0.0871097	0.694993	0.0868357	0.678787	0.0876052	0.706681	0.0848597	0.697634	0.0857612	0.692535	0.0903922	0.708627	0.0909905	0.698565	0.0915528	0.739184	0.0885811	0.705831	0.0933387	0.749502	0.0930403	0.736147	0.0928881
ConcSwap	FALSE	0.755053	0.0941898	0.608729	0.0777633			0.518352	0.066507	0.554801	0.0691152	0.579068	0.0712732	0.571607	0.0718577	0.550096	0.0738695	0.585805	0.0732686	0.601927	0.0736955	0.573272	0.0758196	0.595471	0.0815916	0.685094	0.0859198	0.690573	0.0857124	0.674612	0.0865072	0.719052	0.0853153	0.709108	0.0863958	0.688191	0.0892338	0.704182	0.0898248	0.693791	0.0902979	0.751816	0.0890788	0.700761	0.0920065	0.744612	0.0918056	0.731597	0.0917199
1st Symbol-row	1	0.77255	0.0946962	0.6643	0.0835438			0.528963	0.0674111	0.567501	0.0698071	0.591989	0.0720697	0.583545	0.0727641	0.548715	0.0729238	0.599084	0.0739523	0.616093	0.0743366	0.571989	0.0749401	0.593948	0.0805307	0.683568	0.0849327	0.689123	0.0848132	0.673246	0.0856291	0.734908	0.086301	0.723814	0.0875362	0.686769	0.0882919	0.702725	0.0888719	0.692223	0.0892376	0.768006	0.090118	0.699095	0.0908733	0.743005	0.0907863	0.730106	0.0907881
		0.767141	0.0947496	0.721791	0.0893554			0.541043	0.0686248	0.581961	0.070881	0.6067	0.0732483	0.597136	0.0740213	0.550205	0.0721624	0.614203	0.0750369	0.632224	0.0753951	0.573397	0.0742786	0.595594	0.0796722	0.685227	0.0841916	0.690706	0.0841775	0.674747	0.0850092	0.752962	0.087737	0.74056	0.08909	0.688332	0.0876079	0.704319	0.0881737	0.69393	0.0884182	0.786441	0.0916144	0.700905	0.0899885	0.74475	0.0900271	0.731738	0.0901332
		0.795726	0.0957623	0.781268	0.0951981			0.553616	0.07005	0.597009	0.0722498	0.62201	0.0747134	0.61128	0.0755274	0.5545	0.0716187	0.629936	0.0764343	0.649011	0.0767851	0.577435	0.073864	0.600339	0.0790537	0.689999	0.0837288	0.695254	0.083833	0.67905	0.0846745	0.771753	0.089507	0.757989	0.0909314	0.69281	0.0872114	0.708896	0.0877605	0.698836	0.0878755	0.805629	0.0934469	0.706113	0.089391	0.749771	0.089561	0.736422	0.0897841
		0.778642	0.0965597	0.842799	0.101072			0.565662	0.0715711	0.611425	0.0738028	0.636677	0.0763464	0.624832	0.0771604	0.561413	0.0713165	0.645009	0.0780315	0.665096	0.0783941	0.583926	0.0737143	0.607975	0.0787023	0.697676	0.0835646	0.702566	0.0837948	0.685968	0.0846398	0.789759	0.0914675	0.77469	0.0929112	0.700009	0.08712	0.716255	0.0876504	0.706727	0.0876332	0.824014	0.095467	0.714491	0.0891068	0.757849	0.0894085	0.743954	0.0897558
		0.81971	0.0967352	0.906456	0.106978			0.576205	0.0730648	0.624042	0.0754142	0.649515	0.0780149	0.636692	0.078788	0.570641	0.0712688	0.658201	0.079699	0.679175	0.0800917	0.592587	0.0738361	0.618169	0.0786332	0.707921	0.0837062	0.712324	0.0840645	0.695198	0.0849066	0.805519	0.0934598	0.789309	0.0948689	0.709613	0.0873376	0.726074	0.0878483	0.717258	0.087702	0.840108	0.097511	0.725672	0.0891484	0.768631	0.0895762	0.754005	0.0900496
		0.801578	0.0971265	0.972312	0.112915			0.584392	0.0744103	0.633838	0.0769532	0.659483	0.0795839	0.645901	0.0802784	0.58178	0.0714779	0.668443	0.0813016	0.690107	0.0817404	0.603039	0.0742242	0.630474	0.0788495	0.720288	0.0841473	0.724102	0.0846304	0.706335	0.0854631	0.817758	0.0953224	0.800663	0.096646	0.721203	0.0878546	0.737924	0.0883454	0.72997	0.0880788	0.852606	0.0994133	0.739169	0.0895138	0.781645	0.0900567	0.766135	0.0906528
		0.810253	0.0971373	1.04044	0.118884			0.589558	0.0754984	0.640019	0.0782954	0.665772	0.0809261	0.651712	0.0815107	0.594345	0.0719345	0.674905	0.0827097	0.697007	0.0832066	0.614825	0.0748614	0.644354	0.0793418	0.734235	0.0848688	0.737384	0.0854678	0.718895	0.0862851	0.825485	0.0969044	0.807831	0.0980986	0.734273	0.0886486	0.751288	0.0891201	0.744306	0.0887471	0.860496	0.10102	0.754391	0.0901872	0.796323	0.0908292	0.779813	0.0915388
		0.806863	0.0977295	1.11093	0.124885			0.591286	0.0762411	0.642083	0.0793319	0.667875	0.0819328	0.653655	0.0823852	0.607786	0.0726188	0.677064	0.0838091	0.699316	0.0843716	0.627431	0.07572	0.659201	0.0800885	0.749153	0.0858389	0.751589	0.0865399	0.732327	0.0873366	0.828072	0.0980777	0.810232	0.0991088	0.748251	0.0896847	0.765581	0.0901385	0.75964	0.0896778	0.863139	0.1022	0.770672	0.0911391	0.812022	0.0918598	0.794443	0.0926691
		0.79242	0.0978375	1.18385	0.130918											0.621515	0.0735008					0.640305	0.0767625	0.674366	0.0810571	0.76439	0.0870155	0.766098	0.0878001	0.746045	0.0885717					0.762526	0.0909177	0.780178	0.0913562	0.775302	0.0908301			0.787302	0.0923279	0.828058	0.0931034	0.809385	0.0939942
		0.793293	0.0978667	1.25928	0.136984											0.634933	0.0745419					0.652884	0.0779433	0.689188	0.082205	0.77928	0.088347	0.780276	0.0891931	0.759449	0.0899364					0.776475	0.0922937	0.794442	0.0927197	0.790608	0.0921537			0.803553	0.0937016	0.843729	0.0945058	0.823986	0.0954562
		0.80574	0.098299	1.33733	0.143082											0.647453	0.0756967					0.664619	0.0792107	0.703017	0.0834823	0.793172	0.0897752	0.793504	0.0906581	0.771953	0.0913711					0.789487	0.0937526	0.80775	0.0941697	0.804887	0.0935908			0.818716	0.0952003	0.85835	0.0960056	0.837607	0.0969912
		0.805901	0.0984687	1.41807	0.149213											0.658528	0.0769147					0.674998	0.0805095	0.71525	0.0848331	0.80546	0.0912378	0.805202	0.0921312	0.783012	0.092813					0.800994	0.0952306	0.819519	0.0956427	0.817517	0.0950785			0.832127	0.0967583	0.871283	0.0975373	0.849653	0.0985321
		0.813476	0.0985388	1.50159	0.155377											0.667674	0.0781427					0.683565	0.0817828	0.725352	0.0861983	0.815605	0.0926707	0.814861	0.0935479	0.79214	0.0941991					0.810494	0.0966631	0.829235	0.0970743	0.827945	0.0965519			0.843201	0.0983077	0.881961	0.099034	0.859599	0.100012
		0.82081	0.0986779	1.58801	0.161574											0.67449	0.0793269					0.689948	0.0829749	0.732882	0.0875182	0.823166	0.0940115	0.822057	0.0948462	0.79894	0.095469					0.81757	0.0979875	0.836473	0.098402	0.835716	0.0979465			0.851453	0.0997807	0.889919	0.10043	0.867008	0.101365
		0.858175	0.0997418	1.67741	0.167804											0.678681	0.0804157					0.693867	0.0840338	0.737509	0.0887353	0.82781	0.0952014	0.826477	0.0959695	0.803115	0.0965669					0.821914	0.0991459	0.840918	0.0995677	0.84049	0.0992014			0.856523	0.101113	0.894808	0.101665	0.871558	0.102533
		0.836118	0.100245	1.76989	0.174067											0.680061	0.0813614					0.69515	0.0849133	0.739033	0.0897962	0.829336	0.0961885	0.827927	0.0968687	0.804482	0.0974451					0.823336	0.100088	0.842375	0.100521	0.842058	0.100262			0.858189	0.102246	0.896416	0.102684	0.87305	0.103465
		0.832415	0.100377	1.8	0.176049
		0.856025	0.100527	IsoLine	IsoLine
		0.845896	0.1007
		0.830557	0.100859
		0.843705	0.101133
		0.844952	0.101139
		0.879233	0.101628
		0.830548	0.101757
		0.839368	0.101929
		0.851452	0.102392
		0.862749	0.103211
		0.900191	0.103514
		0.877883	0.103815
		0.855362	0.103998
		0.877125	0.104907
		0.889934	0.105247
		0.882284	0.105622
		0.928994	0.106128
		0.923116	0.106955
		0.887418	0.107269
		0.900829	0.108382
		0.929977	0.109118
		0.936559	0.109466
		0.935939	0.111376
		0.986744	0.112846
		0.971921	0.112885
		1.00163	0.118112
		1.06318	0.118289
		1.03353	0.119463
		1.09767	0.12381
		1.08151	0.124231
		1.15221	0.126416
		1.21528	0.129353
		1.24233	0.134182
		1.23801	0.13472
		1.22215	0.137345
		1.24225	0.137602
		1.3179	0.143459
		1.41502	0.148393
		1.38463	0.14888
		1.45104	0.15497
		1.61536	0.165904
		1.62529	0.16629
		1.88983	0.183745
		1.79486	0.170783
		2.72898	0.22047
		4.03745	0.28537
		4.36743	0.304989
		5.55507	0.347622
		5.82097	0.35837
		5.2184	0.316795
		5.42221	0.320308
		5.91812	0.347821
		6.13375	0.358308
		6.42728	0.371136
		6.58157	0.379228
		6.57031	0.37832
		7.20686	0.412228
		7.10881	0.398591
		6.44235	0.359103
		7.91694	0.43369
		8.22241	0.42844
		8.79332	0.412882
		12.0157	0.493554
		11.8763	0.473844
		12.9418	0.498511
		14.7801	0.564268
		16.393	0.549069
		22.6268	0.613934
		IsoLine	IsoLine
[truncated: 158 more columns]

## Sheet: PlotDat3
Source sheet	all data	0.547115	0.071234	0.498494	0.0656674	0.528352	0.0689787	0.558806	0.0723004	0.589866	0.0756324	0.621545	0.0789747	0.482674	0.064	0.483688	0.064	0.481667	0.064	0.46828	0.0623663	0.591286	0.0762411	0.642083	0.0793319	0.603701	0.0771186
Plot name	Concordia0	0.589216	0.0745225	0.498453	0.0656924	0.528309	0.0690051	0.558759	0.072328	0.589816	0.0756613	0.621492	0.079005	0.482674	0.064	0.488129	0.0645003	0.482674	0.0641142	0.497487	0.0656674	0.590826	0.076459	0.641531	0.0797009	0.603272	0.0773538
Plot Type	1	IsoLine	IsoLine	0.498334	0.0657154	0.528181	0.0690292	0.558623	0.0723534	0.589672	0.0756879	0.621338	0.0790328	0.488129	0.0646157	0.493605	0.0651152	0.488129	0.064731	0.527276	0.0689787	0.589515	0.0765753	0.639961	0.0799691	0.602052	0.0774991
1st free col	29			0.498146	0.0657345	0.527981	0.0690493	0.558409	0.0723745	0.589443	0.07571	0.621096	0.0790559	0.493605	0.0652317	0.4991	0.0657305	0.493605	0.0653482	0.557657	0.0723004	0.587379	0.0765876	0.637402	0.0801312	0.600066	0.0775517
Sigma Level	2			0.497905	0.0657481	0.527723	0.0690637	0.558134	0.0723896	0.58915	0.0757258	0.620784	0.0790724	0.4991	0.0658481	0.504616	0.0663461	0.4991	0.0659657	0.588642	0.0756324	0.584459	0.0764956	0.633906	0.0801842	0.597352	0.0775106
Absolute Errs	FALSE			0.49763	0.0657552	0.527429	0.0690712	0.55782	0.0723974	0.588816	0.075734	0.620429	0.079081	0.504616	0.0664648	0.510152	0.0669621	0.504616	0.0665836	0.620244	0.0789747	0.580813	0.0763013	0.62954	0.0801271	0.593962	0.0773765
Symbol Type	1			0.497344	0.0657552	0.527122	0.0690712	0.557493	0.0723974	0.588468	0.075734	0.620058	0.079081	0.510152	0.0670819	0.515708	0.0675784	0.510152	0.0672018	IsoLine	IsoLine	0.57651	0.0760084	0.624389	0.0799608	0.589963	0.077152
Inverse Plot	FALSE			0.497069	0.0657481	0.526828	0.0690637	0.557179	0.0723896	0.588133	0.0757258	0.619703	0.0790724	0.515708	0.0676994	0.521285	0.0681951	0.515708	0.0678204			0.571635	0.0756225	0.618554	0.0796887	0.585432	0.0768416
Color Plot	TRUE			0.496828	0.0657345	0.526571	0.0690493	0.556904	0.0723745	0.58784	0.07571	0.619391	0.0790559	0.521285	0.0683172	0.526882	0.0688121	0.521285	0.0684394			0.566283	0.0751512	0.612147	0.079316	0.580458	0.0764512
3D plot	FALSE			0.496641	0.0657154	0.52637	0.0690292	0.55669	0.0723534	0.587612	0.0756879	0.619149	0.0790328	0.526882	0.0689354	0.5325	0.0694295	0.526882	0.0690587			0.560558	0.0746037	0.605294	0.07885	0.575138	0.0759885
Linear	FALSE			0.496522	0.0656924	0.526243	0.0690051	0.556554	0.072328	0.587468	0.0756613	0.618995	0.079005	0.5325	0.0695539	0.538139	0.0700472	0.5325	0.0696784			0.554571	0.0739905	0.598129	0.0782998	0.569575	0.0754625
Data Range	AC3:AG4			0.496481	0.0656674	0.526199	0.0689787	0.556508	0.0723004	0.587418	0.0756324	0.618942	0.0789747	0.538139	0.0701728	0.543798	0.0706653	0.538139	0.0702984			0.548439	0.0733238	0.590789	0.0776761	0.563877	0.0748834
Filled Symbols	FALSE			0.496522	0.0656424	0.526243	0.0689524	0.556554	0.0722728	0.587468	0.0756034	0.618995	0.0789445	0.543798	0.0707921	0.549478	0.0712838	0.543798	0.0709188			0.542281	0.0726163	0.58342	0.076991	0.558155	0.0742625
ConcAge	TRUE			0.496641	0.0656194	0.52637	0.0689283	0.55669	0.0722474	0.587612	0.0755769	0.619149	0.0789166	0.549478	0.0714117	0.55518	0.0719026	0.549478	0.0715396			0.536218	0.071882	0.576162	0.0762578	0.552521	0.0736118
ConcSwap	FALSE			0.496828	0.0656003	0.526571	0.0689082	0.556904	0.0722263	0.58784	0.0755548	0.619391	0.0788935	0.55518	0.0720316	0.560902	0.0725218	0.55518	0.0721607			0.530366	0.071135	0.569159	0.0754909	0.547084	0.0729441
1st Symbol-row	1			0.497069	0.0655866	0.526828	0.0688938	0.557179	0.0722112	0.588133	0.075539	0.619703	0.078877	0.560902	0.072652	0.566645	0.0731413	0.560902	0.0727821			0.524841	0.07039	0.562547	0.0747051	0.541951	0.0722723
				0.497344	0.0655795	0.527122	0.0688863	0.557493	0.0722034	0.588468	0.0755307	0.620058	0.0788684	0.566645	0.0732726	0.572409	0.0737612	0.566645	0.073404			0.519749	0.0696613	0.556453	0.0739158	0.53722	0.0716095
				0.49763	0.0655795	0.527429	0.0688863	0.55782	0.0722034	0.588816	0.0755307	0.620429	0.0788684	0.572409	0.0738937	0.578194	0.0743814	0.572409	0.0740262			0.515189	0.0689633	0.550998	0.0731383	0.532985	0.0709686
				0.497905	0.0655866	0.527723	0.0688938	0.558134	0.0722112	0.58915	0.075539	0.620784	0.078877	0.578194	0.0745151	0.584001	0.0750021	0.578194	0.0746487			0.511251	0.0683095	0.546286	0.0723877	0.529327	0.0703621
				0.498146	0.0656003	0.527981	0.0689082	0.558409	0.0722263	0.589443	0.0755548	0.621096	0.0788935	0.584001	0.0751368	0.589829	0.075623	0.584001	0.0752716			0.508011	0.0677127	0.542409	0.0716787	0.526318	0.0698017
				0.498334	0.0656194	0.528181	0.0689283	0.558623	0.0722474	0.589672	0.0755769	0.621338	0.0789166	0.589829	0.075759	0.595679	0.0762443	0.589829	0.0758949			0.505532	0.0671843	0.539444	0.071025	0.524016	0.0692985
				0.498453	0.0656424	0.528309	0.0689524	0.558759	0.0722728	0.589816	0.0756034	0.621492	0.0789445	0.595679	0.0763814	0.60155	0.076866	0.595679	0.0765185			0.503863	0.0667348	0.537447	0.0704394	0.522466	0.0688621
				0.498494	0.0656674	0.528352	0.0689787	0.558806	0.0723004	0.589866	0.0756324	0.621545	0.0789747	0.60155	0.0770043	0.607442	0.0774881	0.60155	0.0771425			0.503035	0.0663729	0.536458	0.0699333	0.521699	0.0685012
				ConcTikEll	ConcTikEll	ConcTikEll	ConcTikEll	ConcTikEll	ConcTikEll	ConcTikEll	ConcTikEll	ConcTikEll	ConcTikEll	0.607442	0.0776275	0.613357	0.0781105	0.607442	0.0777669			0.503066	0.0661055	0.536496	0.0695165	0.521728	0.0682226
														0.613357	0.078251	0.619293	0.0787332	0.613357	0.0783916			0.503953	0.065938	0.53756	0.0691971	0.522555	0.0680319
														0.619293	0.078875	0.625251	0.0793564	0.619293	0.0790167			0.505681	0.0658736	0.53963	0.0689814	0.524162	0.0679326
														0.625251	0.0794993	0.631231	0.0799798	0.625251	0.0796422			0.508215	0.0659135	0.542664	0.0688735	0.526518	0.0679269
														0.631231	0.0801239	0.637233	0.0806037	0.631231	0.080268			0.511507	0.066057	0.546605	0.0688756	0.529578	0.0680148
														0.637233	0.0807489	0.643257	0.0812279	0.637233	0.0808941			0.515491	0.0663012	0.551375	0.0689876	0.533281	0.0681945
														0.643257	0.0813743	0.649303	0.0818524	0.643257	0.0815207			0.520091	0.0666415	0.556882	0.0692074	0.537556	0.0684626
														0.649303	0.082	0.650736	0.082	0.647879	0.082			0.525217	0.0670711	0.563018	0.0695306	0.54232	0.0688138
														0.649303	0.082	ConcBand	ConcBand	ConcBand	ConcBand			0.530769	0.0675818	0.569663	0.0699509	0.54748	0.0692414
														IsoLine	IsoLine							0.536639	0.0681635	0.57669	0.0704602	0.552935	0.0697369
																						0.542713	0.068805	0.58396	0.0710486	0.558579	0.0702908
																						0.548873	0.0694938	0.591333	0.0717047	0.564303	0.0708923
																						0.554999	0.0702165	0.598664	0.0724155	0.569995	0.0715297
																						0.560971	0.0709589	0.605811	0.0731674	0.575543	0.0721905
																						0.566674	0.0717068	0.612636	0.0739456	0.580841	0.0728619
																						0.571995	0.0724454	0.619004	0.0747351	0.585786	0.0735308
																						0.576833	0.0731604	0.624793	0.0755204	0.59028	0.0741843
																						0.581092	0.073838	0.62989	0.0762864	0.594236	0.0748095
																						0.58469	0.0744648	0.634194	0.0770179	0.597578	0.0753943
																						0.587556	0.0750288	0.637623	0.077701	0.60024	0.0759274
																						0.589635	0.075519	0.64011	0.0783221	0.60217	0.0763984
																						0.590887	0.0759257	0.641607	0.0788693	0.603331	0.076798
																						0.591286	0.0762411	0.642083	0.0793319	0.603701	0.0771186
																										Cyan	Cyan

## Sheet: PlotDat5
Source sheet	all data	0.589216	0.0745225	0.513349	0.0673218	0.543504	0.0706383	0.574259	0.0739651	0.605627	0.0773023	0.637621	0.0806498	0.670251	0.0840077	0.703532	0.087376	0.500457	0.066	0.501515	0.066	0.5	0.0660666	0.482812	0.0640155	0.642083	0.0793319	0.667875	0.0819328	0.653655	0.0823852	0.680061	0.0813614	0.677064	0.0838091	0.699316	0.0843716	0.69515	0.0849133	0.640174	0.0799427
Plot name	Concordia1	0.614086	0.0767854	0.513307	0.0673474	0.543459	0.0706652	0.574211	0.0739934	0.605576	0.0773318	0.637566	0.0806807	0.670194	0.08404	0.703471	0.0874097	0.500457	0.066	0.507539	0.0666716	0.500457	0.0661179	0.512308	0.0673218	0.641531	0.0797009	0.667313	0.082277	0.652936	0.0826987	0.679385	0.0818917	0.676487	0.0842061	0.698703	0.0848018	0.694509	0.0853805	0.639802	0.0801486
Plot Type	1	0.603961	0.0770937	0.513184	0.067371	0.543327	0.07069	0.574071	0.0740194	0.605427	0.077359	0.637408	0.0807091	0.670025	0.0840696	0.703293	0.0874405	0.507539	0.0667909	0.514654	0.0674616	0.507539	0.0669103	0.542391	0.0706383	0.639961	0.0799691	0.665716	0.0825144	0.650881	0.0828594	0.677444	0.0823296	0.674845	0.0844999	0.696953	0.0851286	0.692682	0.0857415	0.638739	0.080285
1st free col	43	0.614388	0.0771426	0.51299	0.0673906	0.54312	0.0707106	0.57385	0.0740409	0.605192	0.0773816	0.637158	0.0807327	0.66976	0.0840942	0.703012	0.0874662	0.514654	0.0675824	0.521803	0.0682523	0.514654	0.0677033	0.573073	0.0739651	0.637402	0.0801312	0.663114	0.0826402	0.647547	0.0828627	0.674276	0.0826665	0.67217	0.0846847	0.694102	0.0853457	0.689704	0.0859894	0.637014	0.0803481
Sigma Level	2	0.621788	0.0788993	0.512741	0.0674046	0.542853	0.0707253	0.573566	0.0740564	0.604889	0.0773978	0.636837	0.0807496	0.66942	0.0841119	0.702651	0.0874846	0.521803	0.0683746	0.528986	0.0690435	0.521803	0.0684968	0.604365	0.0773023	0.633906	0.0801842	0.659558	0.0826521	0.643023	0.0827087	0.669942	0.0828958	0.668514	0.0847568	0.690204	0.0854487	0.685634	0.0861193	0.634674	0.0803362
Absolute Errs	FALSE	0.640336	0.079488	0.512456	0.0674119	0.54255	0.070733	0.573242	0.0740644	0.604545	0.0774062	0.63647	0.0807584	0.669031	0.084121	0.70224	0.0874941	0.528986	0.0691672	0.536203	0.0698353	0.528986	0.069291	0.636279	0.0806498	0.62954	0.0801271	0.655116	0.0825498	0.637434	0.0824015	0.664527	0.0830132	0.66395	0.084715	0.685335	0.0854357	0.68055	0.0861286	0.631783	0.0802496
Symbol Type	1	0.633569	0.0799267	0.51216	0.0674119	0.542233	0.070733	0.572904	0.0740644	0.604185	0.0774062	0.636089	0.0807584	0.668626	0.084121	0.701811	0.0874941	0.536203	0.0699605	0.543454	0.0706277	0.536203	0.0700857	0.668829	0.0840077	0.624389	0.0799608	0.649876	0.0823352	0.630932	0.0819496	0.658136	0.0830164	0.658564	0.0845599	0.67959	0.0853069	0.674552	0.0860173	0.62842	0.0800907
Inverse Plot	FALSE	IsoLine	IsoLine	0.511876	0.0674046	0.541929	0.0707253	0.57258	0.0740564	0.603841	0.0773978	0.635722	0.0807496	0.668238	0.0841119	0.7014	0.0874846	0.543454	0.0707544	0.550738	0.0714207	0.543454	0.0708811	0.702025	0.087376	0.618554	0.0796887	0.64394	0.0820127	0.623694	0.0813652	0.650893	0.0829052	0.652463	0.0842947	0.673082	0.0850649	0.667756	0.0857873	0.624676	0.0798638
Color Plot	TRUE			0.511626	0.0673906	0.541663	0.0707106	0.572296	0.0740409	0.603538	0.0773816	0.635401	0.0807327	0.667897	0.0840942	0.701039	0.0874662	0.550738	0.0715488	0.558058	0.0722143	0.550738	0.071677	IsoLine	IsoLine	0.612147	0.079316	0.637422	0.0815884	0.615918	0.0806642	0.64294	0.0826818	0.645764	0.0839244	0.665936	0.0847143	0.660295	0.0854434	0.620654	0.0795751
3D plot	FALSE			0.511432	0.067371	0.541455	0.07069	0.572075	0.0740194	0.603303	0.077359	0.635151	0.0807091	0.667632	0.0840696	0.700758	0.0874405	0.558058	0.0723439	0.565412	0.0730084	0.558058	0.0724735			0.605294	0.07885	0.63045	0.0810707	0.607816	0.0798659	0.634431	0.0823507	0.638599	0.0834564	0.658292	0.084262	0.652313	0.084992	0.616464	0.0792326
Linear	FALSE			0.511309	0.0673474	0.541324	0.0706652	0.571935	0.0739934	0.603154	0.0773318	0.634993	0.0806807	0.667464	0.08404	0.70058	0.0874097	0.565412	0.0731395	0.5728	0.0738032	0.565412	0.0732706			0.598129	0.0782998	0.62316	0.0804695	0.599609	0.078992	0.625532	0.0819181	0.631107	0.0828996	0.650298	0.0837168	0.643967	0.084442	0.612219	0.0788454
Data Range	AC4:AG10			0.511267	0.0673218	0.541279	0.0706383	0.571887	0.0739651	0.603103	0.0773023	0.634938	0.0806498	0.667406	0.0840077	0.700519	0.087376	0.5728	0.0739358	0.580224	0.0745985	0.5728	0.0740683			0.590789	0.0776761	0.615693	0.0797966	0.59152	0.0780663	0.616417	0.0813926	0.623434	0.082265	0.64211	0.0830892	0.635419	0.0838042	0.608036	0.0784242
Filled Symbols	FALSE			0.511309	0.0672961	0.541324	0.0706113	0.571935	0.0739368	0.603154	0.0772727	0.634993	0.0806188	0.667464	0.0839754	0.70058	0.0873424	0.580224	0.0747326	0.587682	0.0753945	0.580224	0.0748666			0.58342	0.076991	0.608194	0.0790651	0.583771	0.077114	0.607261	0.0807844	0.615728	0.0815649	0.633888	0.0823916	0.626834	0.0830909	0.604028	0.0779805
ConcAge	TRUE			0.511432	0.0672725	0.541455	0.0705865	0.572075	0.0739108	0.603303	0.0772455	0.635151	0.0805904	0.667632	0.0839458	0.700758	0.0873116	0.587682	0.07553	0.595176	0.076191	0.587682	0.0756655			0.576162	0.0762578	0.600811	0.0782892	0.576573	0.0761613	0.598245	0.0801053	0.60814	0.0808129	0.625792	0.0816375	0.61838	0.082316	0.600305	0.0775264
ConcSwap	FALSE			0.511626	0.067253	0.541663	0.070566	0.572296	0.0738893	0.603538	0.0772229	0.635401	0.0805668	0.667897	0.0839212	0.701039	0.0872859	0.595176	0.076328	0.602705	0.0769881	0.595176	0.076465			0.569159	0.0754909	0.593686	0.0774841	0.570121	0.0752339	0.589542	0.0793686	0.600818	0.0800237	0.617978	0.0808415	0.610223	0.0814946	0.596969	0.0770742
1st Symbol-row	1			0.511876	0.0672389	0.541929	0.0705512	0.57258	0.0738738	0.603841	0.0772067	0.635722	0.0805499	0.668238	0.0839035	0.7014	0.0872675	0.602705	0.0771266	0.610269	0.0777858	0.602705	0.0772651			0.562547	0.0747051	0.586958	0.0766654	0.564593	0.0743573	0.581323	0.0785885	0.593905	0.0792125	0.6106	0.0800192	0.602519	0.0806427	0.59411	0.0766364
				0.51216	0.0672316	0.542233	0.0705436	0.572904	0.0738658	0.604185	0.0771983	0.636089	0.0805411	0.668626	0.0838944	0.701811	0.087258	0.610269	0.0779258	0.61787	0.0785841	0.610269	0.0780657			0.556453	0.0739158	0.580758	0.075849	0.560138	0.0735553	0.573748	0.0777802	0.587533	0.0783953	0.6038	0.0791865	0.59542	0.0797768	0.591806	0.0762248
				0.512456	0.0672316	0.54255	0.0705436	0.573242	0.0738658	0.604545	0.0771983	0.63647	0.0805411	0.669031	0.0838944	0.70224	0.087258	0.61787	0.0787255	0.625506	0.079383	0.61787	0.078867			0.550998	0.0731383	0.575206	0.0750508	0.556879	0.0728498	0.566964	0.0769596	0.581829	0.0775879	0.597712	0.0783597	0.589064	0.0789139	0.590121	0.0758506
				0.512741	0.0672389	0.542853	0.0705512	0.573566	0.0738738	0.604889	0.0772067	0.636837	0.0805499	0.66942	0.0839035	0.702651	0.0872675	0.625506	0.0795259	0.633178	0.0801824	0.625506	0.0796689			0.546286	0.0723877	0.570412	0.0742864	0.554904	0.0722601	0.561103	0.0761425	0.576902	0.076806	0.592453	0.0775549	0.583573	0.0780706	0.5891	0.0755242
				0.51299	0.067253	0.54312	0.070566	0.57385	0.0738893	0.605192	0.0772229	0.637158	0.0805668	0.66976	0.0839212	0.703012	0.0872859	0.633178	0.0803269	0.640886	0.0809825	0.633178	0.0804713			0.542409	0.0716787	0.566467	0.0735706	0.554268	0.0718023	0.556279	0.0753449	0.572849	0.0760649	0.588126	0.0767877	0.579056	0.0772635	0.588771	0.0752543
				0.513184	0.0672725	0.543327	0.0705865	0.574071	0.0739108	0.605427	0.0772455	0.637408	0.0805904	0.670025	0.0839458	0.703293	0.0873116	0.640886	0.0811284	0.648631	0.0817832	0.640886	0.0812744			0.539444	0.071025	0.563449	0.0729174	0.554986	0.0714888	0.552586	0.0745823	0.569749	0.0753789	0.584815	0.0760731	0.5756	0.0765083	0.589144	0.0750484
				0.513307	0.0672961	0.543459	0.0706113	0.574211	0.0739368	0.605576	0.0772727	0.637566	0.0806188	0.670194	0.0839754	0.703471	0.0873424	0.648631	0.0819306	0.656412	0.0825844	0.648631	0.082078			0.537447	0.0704394	0.561417	0.0723395	0.557041	0.0713281	0.550096	0.0738695	0.567661	0.0747614	0.582585	0.0754249	0.573272	0.0758196	0.590207	0.074912
				0.513349	0.0673218	0.543504	0.0706383	0.574259	0.0739651	0.605627	0.0773023	0.637621	0.0806498	0.670251	0.0840077	0.703532	0.087376	0.656412	0.0827333	0.664231	0.0833863	0.656412	0.0828823			0.536458	0.0699333	0.56041	0.0718481	0.560376	0.0713248	0.548857	0.0732204	0.566627	0.0742245	0.58148	0.0748558	0.572118	0.0752108	0.591932	0.0748489
				ConcTikEll	ConcTikEll	ConcTikEll	ConcTikEll	ConcTikEll	ConcTikEll	ConcTikEll	ConcTikEll	ConcTikEll	ConcTikEll	ConcTikEll	ConcTikEll	ConcTikEll	ConcTikEll	0.664231	0.0835367	0.672085	0.0841887	0.664231	0.0836871			0.536496	0.0695165	0.560448	0.0714528	0.564899	0.0714788	0.548894	0.0726477	0.566667	0.0737786	0.581519	0.0743769	0.57216	0.0746938	0.594272	0.0748608
																		0.672085	0.0843406	0.679978	0.0849917	0.672085	0.0844926			0.53756	0.0691971	0.56153	0.0711613	0.570488	0.071786	0.550205	0.0721624	0.567779	0.0734323	0.582704	0.0739974	0.573397	0.0742786	0.597163	0.0749474
																		0.679978	0.0851452	0.687907	0.0857954	0.679978	0.0852986			0.53963	0.0689814	0.563635	0.0709793	0.57699	0.0722379	0.552766	0.0717741	0.569943	0.0731925	0.58501	0.0737248	0.575805	0.0739734	0.600526	0.0751063
																		0.687907	0.0859503	0.695874	0.0865996	0.687907	0.0861053			0.542664	0.0688735	0.566722	0.0709103	0.584228	0.0728223	0.556526	0.0714903	0.573116	0.0730637	0.588393	0.0735644	0.579338	0.0737841	0.604269	0.0753332
																		0.695874	0.086756	0.703878	0.0874044	0.695874	0.0869125			0.546605	0.0688756	0.57073	0.0709556	0.592004	0.0735232	0.561413	0.0713165	0.577236	0.0730485	0.592787	0.0735193	0.583926	0.0737143	0.608291	0.0756218
																		0.703878	0.0875624	0.71192	0.0882098	0.703878	0.0877203			0.551375	0.0689876	0.575583	0.0711144	0.600106	0.0743216	0.56733	0.071256	0.582223	0.0731472	0.598107	0.0735904	0.58948	0.0737654	0.612482	0.0759644
																		0.71192	0.0883693	0.72	0.0890158	0.71192	0.0885288			0.556882	0.0692074	0.581185	0.0713836	0.608314	0.0751955	0.574164	0.0713102	0.587981	0.0733579	0.604248	0.0737762	0.595893	0.0739365	0.616727	0.0763516
																		0.72	0.0891768	0.72	0.0890158	0.72	0.0893378			0.563018	0.0695306	0.587427	0.0717579	0.616402	0.0761212	0.58178	0.0714779	0.594396	0.0736764	0.611092	0.0740733	0.603039	0.0742242	0.62091	0.0767728
																		0.72	0.0891768	ConcBand	ConcBand	0.72	0.0893378			0.569663	0.0699509	0.594188	0.0722301	0.624151	0.0770734	0.590031	0.0717558	0.601345	0.0740966	0.618505	0.0744757	0.610779	0.0746228	0.624918	0.0772165
																		IsoLine	IsoLine			ConcBand	ConcBand			0.57669	0.0704602	0.601337	0.0727909	0.63135	0.0780262	0.598756	0.0721386	0.608691	0.0746102	0.626343	0.0749756	0.618963	0.0751247	0.628641	0.0776706
																										0.58396	0.0710486	0.608734	0.0734295	0.637801	0.0789536	0.607786	0.0726188	0.616293	0.0752074	0.634454	0.0755635	0.627431	0.07572	0.631977	0.0781227
																										0.591333	0.0717047	0.616235	0.0741334	0.64333	0.0798302	0.616944	0.073187	0.624001	0.0758764	0.642678	0.0762276	0.636018	0.0763973	0.634836	0.0785606
																										0.598664	0.0724155	0.623694	0.0748889	0.647784	0.0806322	0.626052	0.0738323	0.631666	0.0766042	0.650858	0.0769553	0.644558	0.0771432	0.637139	0.0789722
																										0.605811	0.0731674	0.630966	0.0756814	0.651043	0.0813377	0.634933	0.0745419	0.63914	0.0773767	0.658832	0.0777322	0.652884	0.0779433	0.638825	0.0793463
																										0.612636	0.0739456	0.637909	0.0764953	0.653018	0.0819274	0.643414	0.0753022	0.646275	0.0781788	0.666447	0.0785434	0.660834	0.078782	0.639846	0.0796728
																										0.619004	0.0747351	0.644389	0.0773148	0.653655	0.0823852	0.651331	0.0760983	0.652934	0.078995	0.673553	0.0793729	0.668253	0.079643	0.640174	0.0799427
																										0.624793	0.0755204	0.650279	0.0781241	Black	Black	0.658528	0.0769147	0.658986	0.0798093	0.680013	0.0802046	0.674998	0.0805095	Cyan	Cyan
																										0.62989	0.0762864	0.655465	0.0789073			0.664866	0.0777356	0.664315	0.0806059	0.6857	0.0810224	0.680936	0.0813647
																										0.634194	0.0770179	0.659845	0.0796492			0.670222	0.0785449	0.668815	0.0813693	0.690505	0.0818104	0.685952	0.0821918
																										0.637623	0.077701	0.663335	0.0803354			0.67449	0.0793269	0.672401	0.0820846	0.694333	0.0825531	0.689948	0.0829749
																										0.64011	0.0783221	0.665866	0.0809524			0.67759	0.0800664	0.675001	0.0827379	0.69711	0.0832362	0.692847	0.0836987
																										0.641607	0.0788693	0.667389	0.0814884			0.679458	0.080749	0.676566	0.0833165	0.698782	0.0838463	0.694592	0.084349
																										0.642083	0.0793319	0.667875	0.0819328			0.680061	0.0813614	0.677064	0.0838091	0.699316	0.0843716	0.69515	0.0849133
																										Black	Black	Black	Black			Black	Black	Black	Black	Black	Black	Black	Black

## Sheet: PlotDat4
Source sheet	all data	0.547115	0.071234	0.3	0.0421818	0.343738	0.0476374	0.591286	0.0762411	0.642083	0.0793319	0.667875	0.0819328	0.653655	0.0823852	0.680061	0.0813614	0.677064	0.0838091	0.699316	0.0843716	0.69515	0.0849133	0.739033	0.0897962	0.829336	0.0961885	0.827927	0.0968687	0.804482	0.0974451	0.828072	0.0980777	0.810232	0.0991088	0.823336	0.100088	0.842375	0.100521	0.842058	0.100262	0.863139	0.1022	0.858189	0.102246	0.896416	0.102684	0.87305	0.103465
Plot name	Concordia0	0.589216	0.0745225	0.312171	0.0437219	0.411563	0.0557947	0.589436	0.0765781	0.640872	0.0798479	0.666643	0.0824094	0.651572	0.082831	0.678571	0.0821228	0.675797	0.0843663	0.697968	0.0849786	0.693742	0.0855748	0.737387	0.0906547	0.827677	0.0969296	0.826344	0.0975044	0.80298	0.098065	0.826565	0.0986218	0.808835	0.0995196	0.821774	0.100772	0.840781	0.101219	0.840351	0.101081	0.861601	0.102739	0.856378	0.103131	0.89467	0.103443	0.871418	0.10412
Plot Type	1	0.614086	0.0767854	0.343738	0.0476374	0.482812	0.0640155	0.584157	0.0764822	0.637402	0.0801312	0.663114	0.0826402	0.645631	0.0828121	0.674276	0.0826665	0.67217	0.0846847	0.694102	0.0853457	0.689704	0.0859894	0.732642	0.0912732	0.822905	0.0973924	0.821797	0.0978489	0.798677	0.0983996	0.822239	0.0988703	0.804824	0.0996297	0.817295	0.101168	0.836204	0.101632	0.835446	0.101624	0.857184	0.102972	0.85117	0.103728	0.889649	0.103909	0.866733	0.104469
1st free col	253	0.603961	0.0770937	0.376064	0.0515675	0.557657	0.0723004	0.575877	0.0759611	0.631827	0.0801694	0.657443	0.0826151	0.636315	0.0823298	0.667364	0.0829687	0.666341	0.0847501	0.687885	0.0854567	0.683213	0.0861391	0.725006	0.0916246	0.815228	0.0975566	0.814484	0.0978871	0.791759	0.0984343	0.815283	0.0988124	0.798372	0.0994343	0.810097	0.10126	0.828845	0.101742	0.827554	0.101866	0.850081	0.10289	0.842793	0.104013	0.881571	0.104062	0.859201	0.104497
Sigma Level	2	0.614388	0.0771426	0.409168	0.0555124	0.636279	0.0806498	0.565267	0.075057	0.624389	0.0799608	0.649876	0.0823352	0.624378	0.0814234	0.658136	0.0830164	0.658564	0.0845599	0.67959	0.0853069	0.674552	0.0860173	0.714812	0.0916937	0.804983	0.097415	0.804726	0.0976173	0.782529	0.0981676	0.805999	0.0984506	0.789763	0.0989419	0.800492	0.101042	0.819026	0.101544	0.817023	0.101797	0.840603	0.102497	0.831611	0.103971	0.87079	0.103894	0.84915	0.104203
Absolute Errs	FALSE	0.621788	0.0788993	0.443068	0.059472	0.718871	0.0890642	0.553186	0.0738433	0.615414	0.0795145	0.640746	0.0818128	0.610786	0.0801662	0.646996	0.0828073	0.64918	0.0841223	0.66958	0.0849028	0.6641	0.0856292	0.702507	0.0914774	0.792616	0.0969739	0.792948	0.0970514	0.771392	0.097611	0.794796	0.0978008	0.779371	0.0981741	0.788902	0.100525	0.807176	0.101047	0.804311	0.101421	0.829163	0.101809	0.818115	0.103606	0.857776	0.103414	0.837021	0.1036
Symbol Type	1	0.640336	0.079488	0.477784	0.0634465	0.805631	0.097544	0.540613	0.0724181	0.605294	0.07885	0.63045	0.0810707	0.596642	0.0786601	0.634431	0.0823507	0.638599	0.0834564	0.658292	0.084262	0.652313	0.084992	0.688627	0.0909851	0.778669	0.0962524	0.779667	0.0962141	0.758832	0.0967891	0.782161	0.0968912	0.767653	0.0971644	0.775832	0.0997311	0.793812	0.100272	0.789975	0.100752	0.816261	0.100857	0.802893	0.102932	0.843098	0.102641	0.823342	0.102714
Inverse Plot	FALSE	0.633569	0.0799267	0.513336	0.067436	0.89677	0.10609	0.528567	0.070897	0.594472	0.0779964	0.619439	0.0801412	0.583091	0.0770271	0.620991	0.0816664	0.627284	0.0825913	0.646218	0.0834126	0.639708	0.0841334	0.67378	0.0902384	0.763751	0.0952823	0.765461	0.095142	0.7454	0.0957375	0.768647	0.0957618	0.755118	0.0959569	0.761854	0.098695	0.779519	0.099254	0.774641	0.0998215	0.802463	0.0996823	0.786612	0.10198	0.827398	0.101611	0.808712	0.101584
Color Plot	FALSE	0.66649	0.0851634	0.549742	0.0714404	0.99251	0.114702	0.518024	0.0694033	0.58342	0.076991	0.608194	0.0790651	0.57123	0.0753995	0.607261	0.0807844	0.615728	0.0815649	0.633888	0.0823916	0.626834	0.0830909	0.658614	0.0892698	0.748514	0.0941057	0.750952	0.0938818	0.731682	0.0945024	0.754846	0.0944618	0.742317	0.0946044	0.747579	0.097462	0.764922	0.0980363	0.758979	0.0986692	0.78837	0.0983363	0.769982	0.100792	0.811363	0.100367	0.79377	0.100259
3D plot	FALSE	0.756452	0.0905606	0.587024	0.0754598	1.09308	0.123382	0.509838	0.0680578	0.572621	0.0758777	0.597207	0.0778894	0.562021	0.0739091	0.593843	0.0797433	0.604437	0.080422	0.62184	0.0812438	0.614254	0.0819101	0.643793	0.0881219	0.733624	0.0927742	0.736774	0.0924888	0.718278	0.0931377	0.741359	0.093048	0.729807	0.0931661	0.733631	0.096086	0.750658	0.0966728	0.743674	0.0973456	0.774598	0.0968779	0.753731	0.0994179	0.795692	0.0989647	0.77917	0.0987968
Linear	FALSE	0.758525	0.0908409	0.625203	0.0794943	1.19873	0.132129	0.504671	0.0669697	0.562547	0.0747051	0.586958	0.0766654	0.55621	0.0726768	0.581323	0.0785885	0.593905	0.0792125	0.6106	0.0800192	0.602519	0.0806427	0.629964	0.0868446	0.719732	0.091346	0.723546	0.0910237	0.705774	0.0917031	0.728777	0.0915823	0.718136	0.0917047	0.720618	0.0946271	0.737351	0.0952228	0.729394	0.0959085	0.76175	0.0953707	0.738568	0.0979192	0.78107	0.0974648	0.765549	0.0972618
Data Range	AC3:AG102	0.738864	0.0915371	0.664301	0.0835439	1.30971	0.140944	0.502943	0.066227	0.553639	0.0735246	0.577894	0.0754466	0.554268	0.0718023	0.570249	0.0773705	0.584591	0.0779894	0.600659	0.0787714	0.592141	0.0793439	0.617731	0.0854938	0.707444	0.0898834	0.711848	0.0895507	0.694715	0.0902611	0.717649	0.0901286	0.707814	0.0902842	0.709111	0.0931491	0.725582	0.0937498	0.716764	0.0944207	0.750387	0.0938806	0.725157	0.0963611	0.768138	0.0959331	0.753502	0.0957209
Filled Symbols	FALSE	0.762053	0.0918592	0.704339	0.0876087	1.42629	0.149828	0.504793	0.06589	0.546286	0.0723877	0.570412	0.0742864	0.556351	0.0713565	0.561103	0.0761425	0.576902	0.076806	0.592453	0.0775549	0.583573	0.0780706	0.607629	0.0841286	0.697299	0.0884505	0.702189	0.088134	0.685587	0.088875	0.708461	0.0887507	0.699291	0.0889666	0.699612	0.0917166	0.715866	0.0923182	0.706336	0.0929474	0.741005	0.0924728	0.714083	0.0948117	0.757459	0.0944365	0.743557	0.0942414
ConcAge	FALSE	0.748997	0.0926394	0.74534	0.0916888	1.54876	0.158781	0.510072	0.0659859	0.540809	0.0713441	0.564838	0.0732353	0.562291	0.0713754	0.554286	0.0749583	0.571176	0.0757141	0.586339	0.0764229	0.577191	0.0768785	0.600099	0.0828087	0.689738	0.0871097	0.694993	0.0868357	0.678787	0.0876052	0.701616	0.0875085	0.692941	0.0878096	0.692535	0.0903922	0.708627	0.0909905	0.698565	0.0915528	0.734015	0.0912087	0.705831	0.0933387	0.749502	0.0930403	0.736147	0.0928881
ConcSwap	FALSE	0.755053	0.0941898	0.787328	0.0957842	1.67741	0.167804	0.518352	0.066507	0.537447	0.0704394	0.561417	0.0723395	0.571607	0.0718577	0.550096	0.0738695	0.567661	0.0747614	0.582585	0.0754249	0.573272	0.0758196	0.595471	0.0815916	0.685094	0.0859198	0.690573	0.0857124	0.674612	0.0865072	0.697412	0.0864566	0.689041	0.0868636	0.688191	0.0892338	0.704182	0.0898248	0.693791	0.0902979	0.729722	0.0901437	0.700761	0.0920065	0.744612	0.0918056	0.731597	0.0917199
1st Symbol-row	1	0.77255	0.0946962	0.830326	0.0998949	IsoLine	IsoLine	0.528963	0.0674111	0.536349	0.0697132	0.560298	0.0716379	0.583545	0.0727641	0.548715	0.0729238	0.566513	0.0739896	0.581356	0.0746044	0.571989	0.0749401	0.593948	0.0805307	0.683568	0.0849327	0.689123	0.0848132	0.673246	0.0856291	0.696034	0.0856407	0.687761	0.08617	0.686769	0.0882919	0.702725	0.0888719	0.692223	0.0892376	0.728314	0.0893242	0.699095	0.0908733	0.743005	0.0907863	0.730106	0.0907881
		0.767141	0.0947496	0.874358	0.104021			0.541043	0.0686248	0.53756	0.0691971	0.56153	0.0711613	0.597136	0.0740213	0.550205	0.0721624	0.567779	0.0734323	0.582704	0.0739974	0.573397	0.0742786	0.595594	0.0796722	0.685227	0.0841916	0.690706	0.0841775	0.674747	0.0850092	0.69754	0.0850966	0.689158	0.0857593	0.688332	0.0876079	0.704319	0.0881737	0.69393	0.0884182	0.729852	0.0887861	0.700905	0.0899885	0.74475	0.0900271	0.731738	0.0901332
		0.795726	0.0957623	0.91945	0.108163			0.553616	0.07005	0.54103	0.0689138	0.565059	0.0709305	0.61128	0.0755274	0.5545	0.0716187	0.571407	0.073114	0.58657	0.0736304	0.577435	0.073864	0.600339	0.0790537	0.689999	0.0837288	0.695254	0.083833	0.67905	0.0846745	0.701867	0.0848481	0.69317	0.0856492	0.69281	0.0872114	0.708896	0.0877605	0.698836	0.0878755	0.734269	0.0885528	0.706113	0.089391	0.749771	0.089561	0.736422	0.0897841
		0.778642	0.0965597	0.965626	0.11232			0.565662	0.0715711	0.546605	0.0688756	0.57073	0.0709556	0.624832	0.0771604	0.561413	0.0713165	0.577236	0.0730485	0.592787	0.0735193	0.583926	0.0737143	0.607975	0.0787023	0.697676	0.0835646	0.702566	0.0837948	0.685968	0.0846398	0.708823	0.084906	0.699621	0.0858446	0.700009	0.08712	0.716255	0.0876504	0.706727	0.0876332	0.741372	0.0886347	0.714491	0.0891068	0.757849	0.0894085	0.743954	0.0897558
		0.81971	0.0967352	1.01291	0.116493			0.576205	0.0730648	0.554043	0.0690843	0.578297	0.0712355	0.636692	0.078788	0.570641	0.0712688	0.585013	0.0732388	0.601082	0.0736691	0.592587	0.0738361	0.618169	0.0786332	0.707921	0.0837062	0.712324	0.0840645	0.695198	0.0849066	0.718106	0.0852678	0.708231	0.0863369	0.709613	0.0873376	0.726074	0.0878483	0.717258	0.087702	0.75085	0.0890281	0.725672	0.0891484	0.768631	0.0895762	0.754005	0.0900496
		0.801578	0.0971265	1.06134	0.120681			0.584392	0.0744103	0.563018	0.0695306	0.587427	0.0717579	0.645901	0.0802784	0.58178	0.0714779	0.594396	0.0736764	0.611092	0.0740733	0.603039	0.0742242	0.630474	0.0788495	0.720288	0.0841473	0.724102	0.0846304	0.706335	0.0854631	0.72931	0.0859176	0.718622	0.0871048	0.721203	0.0878546	0.737924	0.0883454	0.72997	0.0880788	0.76229	0.0897158	0.739169	0.0895138	0.781645	0.0900567	0.766135	0.0906528
		0.810253	0.0971373	1.11093	0.124885			0.589558	0.0754984	0.573138	0.070195	0.597723	0.0725001	0.651712	0.0815107	0.594345	0.0719345	0.604977	0.0743423	0.62238	0.074714	0.614825	0.0748614	0.644354	0.0793418	0.734235	0.0848688	0.737384	0.0854678	0.718895	0.0862851	0.741945	0.0868272	0.730341	0.0881145	0.734273	0.0886486	0.751288	0.0891201	0.744306	0.0887471	0.775191	0.0906677	0.754391	0.0901872	0.796323	0.0908292	0.779813	0.0915388
		0.806863	0.0977295	1.16171	0.129105			0.591286	0.0762411	0.58396	0.0710486	0.608734	0.0734295	0.653655	0.0823852	0.607786	0.0726188	0.616293	0.0752074	0.634454	0.0755635	0.627431	0.07572	0.659201	0.0800885	0.749153	0.0858389	0.751589	0.0865399	0.732327	0.0873366	0.755458	0.0879566	0.742875	0.089322	0.748251	0.0896847	0.765581	0.0901385	0.75964	0.0896778	0.78899	0.0918424	0.770672	0.0911391	0.812022	0.0918598	0.794443	0.0926691
		0.79242	0.0978375	1.21371	0.133341			Black	Black	0.595012	0.0720541	0.619979	0.0745056	Black	Black	0.621515	0.0735008	0.627849	0.0762338	0.646784	0.0765844	0.640305	0.0767625	0.674366	0.0810571	0.76439	0.0870155	0.766098	0.0878001	0.746045	0.0885717	0.76926	0.0892567	0.755676	0.0906745	0.762526	0.0909177	0.780178	0.0913562	0.775302	0.0908301	0.803083	0.0931883	0.787302	0.0923279	0.828058	0.0931034	0.809385	0.0939942
		0.793293	0.0978667	1.26697	0.137593					0.605811	0.0731674	0.630966	0.0756814			0.634933	0.0745419	0.63914	0.0773767	0.658832	0.0777322	0.652884	0.0779433	0.689188	0.082205	0.77928	0.088347	0.780276	0.0891931	0.759449	0.0899364	0.782747	0.0906704	0.768186	0.0921128	0.776475	0.0922937	0.794442	0.0927197	0.790608	0.0921537	0.816855	0.0946467	0.803553	0.0937016	0.843729	0.0945058	0.823986	0.0954562
		0.80574	0.098299	1.32151	0.14186					0.615885	0.0743399	0.641215	0.0769054			0.647453	0.0756967	0.649672	0.0785862	0.670072	0.0789568	0.664619	0.0792107	0.703017	0.0834823	0.793172	0.0897752	0.793504	0.0906581	0.771953	0.0913711	0.795329	0.0921361	0.779857	0.0935742	0.789487	0.0937526	0.80775	0.0941697	0.804887	0.0935908	0.829703	0.0961539	0.818716	0.0952003	0.85835	0.0960056	0.837607	0.0969912
		0.805901	0.0984687	1.37736	0.146144					0.624793	0.0755204	0.650279	0.0781241			0.658528	0.0769147	0.658986	0.0798093	0.680013	0.0802046	0.674998	0.0805095	0.71525	0.0848331	0.80546	0.0912378	0.805202	0.0921312	0.783012	0.092813	0.806457	0.0935898	0.79018	0.0949947	0.800994	0.0952306	0.819519	0.0956427	0.817517	0.0950785	0.841066	0.097644	0.832127	0.0967583	0.871283	0.0975373	0.849653	0.0985321
		0.813476	0.0985388	1.43455	0.150443					0.632146	0.0766574	0.657761	0.0792843			0.667674	0.0781427	0.666674	0.0809927	0.688219	0.0814211	0.683565	0.0817828	0.725352	0.0861983	0.815605	0.0926707	0.814861	0.0935479	0.79214	0.0941991	0.815645	0.0949678	0.798702	0.0963123	0.810494	0.0966631	0.829235	0.0970743	0.827945	0.0965519	0.850448	0.0990518	0.843201	0.0983077	0.881961	0.099034	0.859599	0.100012
		0.82081	0.0986779	1.49312	0.154759					0.637623	0.077701	0.663335	0.0803354			0.67449	0.0793269	0.672401	0.0820846	0.694333	0.0825531	0.689948	0.0829749	0.732882	0.0875182	0.823166	0.0940115	0.822057	0.0948462	0.79894	0.095469	0.82249	0.0962099	0.805052	0.0974693	0.81757	0.0979875	0.836473	0.098402	0.835716	0.0979465	0.857438	0.100316	0.851453	0.0997807	0.889919	0.10043	0.867008	0.101365
		0.858175	0.0997418	1.55309	0.159091					0.640985	0.0786056	0.666756	0.0812312			0.678681	0.0804157	0.675915	0.0830373	0.698087	0.0835511	0.693867	0.0840338	0.737509	0.0887353	0.82781	0.0952014	0.826477	0.0959695	0.803115	0.0965669	0.826694	0.0972619	0.808952	0.0984153	0.821914	0.0991459	0.840918	0.0995677	0.84049	0.0992014	0.861731	0.101381	0.856523	0.101113	0.894808	0.101665	0.871558	0.102533
		0.836118	0.100245	1.61451	0.163439					0.642083	0.0793319	0.667875	0.0819328			0.680061	0.0813614	0.677064	0.0838091	0.699316	0.0843716	0.69515	0.0849133	0.739033	0.0897962	0.829336	0.0961885	0.827927	0.0968687	0.804482	0.0974451	0.828072	0.0980777	0.810232	0.0991088	0.823336	0.100088	0.842375	0.100521	0.842058	0.100262	0.863139	0.1022	0.858189	0.102246	0.896416	0.102684	0.87305	0.103465
		0.832415	0.100377	1.67741	0.167804					Black	Black	Black	Black			Black	Black	Black	Black	Black	Black	Black	Black	Black	Black	Black	Black	Black	Black	Black	Black	Black	Black	Black	Black	Black	Black	Black	Black	Black	Black	Black	Black	Black	Black	Black	Black	Black	Black
		0.856025	0.100527	1.7	0.16934
		0.845896	0.1007	IsoLine	IsoLine
		0.830557	0.100859
		0.843705	0.101133
		0.844952	0.101139
		0.879233	0.101628
		0.830548	0.101757
		0.839368	0.101929
		0.851452	0.102392
		0.862749	0.103211
		0.900191	0.103514
		0.877883	0.103815
		0.855362	0.103998
		0.877125	0.104907
		0.889934	0.105247
		0.882284	0.105622
		0.928994	0.106128
		0.923116	0.106955
		0.887418	0.107269
		0.900829	0.108382
		0.929977	0.109118
		0.936559	0.109466
		0.935939	0.111376
		0.986744	0.112846
		0.971921	0.112885
		1.00163	0.118112
		1.06318	0.118289
		1.03353	0.119463
		1.09767	0.12381
		1.08151	0.124231
		1.15221	0.126416
		1.21528	0.129353
		1.24233	0.134182
		1.23801	0.13472
		1.22215	0.137345
		1.24225	0.137602
		1.3179	0.143459
		1.41502	0.148393
		1.38463	0.14888
		1.45104	0.15497
		1.61536	0.165904
		1.62529	0.16629
		1.88983	0.183745
		1.79486	0.170783
		2.72898	0.22047
		4.03745	0.28537
		4.36743	0.304989
		5.55507	0.347622
		5.82097	0.35837
		5.2184	0.316795
		5.42221	0.320308
		5.91812	0.347821
		6.13375	0.358308
		6.42728	0.371136
		6.58157	0.379228
		6.57031	0.37832
		7.20686	0.412228
		7.10881	0.398591
		6.44235	0.359103
		7.91694	0.43369
		8.22241	0.42844
		8.79332	0.412882
		12.0157	0.493554
		11.8763	0.473844
		12.9418	0.498511
		14.7801	0.564268
		16.393	0.549069
		22.6268	0.613934
		IsoLine	IsoLine
[truncated: 202 more columns]

## Sheet: PlotDat6
Source sheet	all data	0.756452	0.0905606	0.670251	0.0840077	0.703532	0.087376	0.737476	0.0907549	0.772097	0.0941442	0.807407	0.097544	0.843421	0.100954	0.64	0.0810364	0.64	0.0808907	0.64	0.0811822	0.636279	0.0806498	0.829336	0.0961885	0.804482	0.0974451	0.810232	0.0991088	0.842375	0.100521	0.791061	0.0960758
Plot name	Concordia1	0.738864	0.0915371	0.670194	0.08404	0.703471	0.0874097	0.737412	0.0907898	0.772028	0.0941805	0.807335	0.0975817	0.843345	0.100994	0.64	0.0810364	0.64	0.0808907	0.64	0.0811822	0.668829	0.0840077	0.828582	0.0967121	0.803798	0.0978889	0.809597	0.0994155	0.84165	0.101016	0.790476	0.0963738
Plot Type	1	0.748997	0.0926394	0.670025	0.0840696	0.703293	0.0874405	0.737223	0.090822	0.771829	0.0942139	0.807125	0.0976164	0.843123	0.101029	0.647134	0.0817758	0.647134	0.0816287	0.647134	0.081923	0.702025	0.087376	0.826424	0.0971161	0.80185	0.0982092	0.807782	0.0995903	0.839579	0.101389	0.788804	0.0965609
1st free col	35	0.77255	0.0946962	0.66976	0.0840942	0.703012	0.0874662	0.736926	0.0908486	0.771516	0.0942416	0.806794	0.0976451	0.842775	0.101059	0.654299	0.0825157	0.654299	0.0823672	0.654299	0.0826642	0.735883	0.0907549	0.822905	0.0973924	0.798677	0.0983996	0.804824	0.0996297	0.836204	0.101632	0.786088	0.096632
Sigma Level	2	IsoLine	IsoLine	0.66942	0.0841119	0.702651	0.0874846	0.736545	0.0908677	0.771113	0.0942615	0.806369	0.0976657	0.842326	0.101081	0.661496	0.0832561	0.661496	0.0831061	0.661496	0.083406	0.770413	0.0941442	0.818091	0.0975357	0.794339	0.0984564	0.800778	0.0995331	0.83159	0.10174	0.782405	0.0965851
Absolute Errs	FALSE			0.669031	0.084121	0.70224	0.0874941	0.736109	0.0908777	0.770653	0.0942718	0.805884	0.0976765	0.841815	0.101092	0.668724	0.0839969	0.668724	0.0838456	0.668724	0.0841482	0.805631	0.097544	0.812078	0.0975433	0.788921	0.0983786	0.795725	0.0993024	0.825827	0.10171	0.777853	0.0964215
Symbol Type	1			0.668626	0.084121	0.701811	0.0874941	0.735656	0.0908777	0.770174	0.0942718	0.805378	0.0976765	0.841283	0.101092	0.675983	0.0847383	0.675983	0.0845857	0.675983	0.084891	0.841549	0.100954	0.804983	0.097415	0.782529	0.0981676	0.789763	0.0989419	0.819026	0.101544	0.772558	0.0961457
Inverse Plot	FALSE			0.668238	0.0841119	0.7014	0.0874846	0.735221	0.0908677	0.769714	0.0942615	0.804893	0.0976657	0.840771	0.101081	0.683274	0.0854802	0.683274	0.0853262	0.683274	0.0856343	IsoLine	IsoLine	0.796942	0.0971533	0.775288	0.0978275	0.783006	0.0984588	0.811321	0.101245	0.766663	0.0957653
Color Plot	FALSE			0.667897	0.0840942	0.701039	0.0874662	0.734839	0.0908486	0.769311	0.0942416	0.804468	0.0976451	0.840323	0.101059	0.690596	0.0862226	0.690596	0.0860672	0.690596	0.0863781			0.788114	0.0967632	0.767337	0.097365	0.775588	0.0978624	0.802862	0.100818	0.76033	0.0952905
3D plot	FALSE			0.667632	0.0840696	0.700758	0.0874405	0.734542	0.090822	0.768997	0.0942139	0.804137	0.0976164	0.839974	0.101029	0.69795	0.0869656	0.69795	0.0868087	0.69795	0.0871224			0.778669	0.0962524	0.758832	0.0967891	0.767653	0.0971644	0.793812	0.100272	0.753731	0.0947343
Linear	FALSE			0.667464	0.08404	0.70058	0.0874097	0.734354	0.0907898	0.768798	0.0941805	0.803927	0.0975817	0.839753	0.100994	0.705337	0.087709	0.705337	0.0875507	0.705337	0.0878672			0.768792	0.0956309	0.749939	0.0961109	0.759354	0.0963783	0.784349	0.099618	0.747047	0.094112
Data Range	AC12:AG18			0.667406	0.0840077	0.700519	0.087376	0.734289	0.0907549	0.76873	0.0941442	0.803855	0.097544	0.839677	0.100954	0.712755	0.0884529	0.712755	0.0882933	0.712755	0.0886125			0.758675	0.0949106	0.740829	0.0953437	0.750853	0.0955194	0.774656	0.0988677	0.740458	0.0934404
Filled Symbols	FALSE			0.667464	0.0839754	0.70058	0.0873424	0.734354	0.0907199	0.768798	0.0941079	0.803927	0.0975064	0.839753	0.100915	0.720206	0.0891973	0.720206	0.0890363	0.720206	0.0893584			0.748514	0.0941057	0.731682	0.0945024	0.742317	0.0946044	0.764922	0.0980363	0.734146	0.092738
ConcAge	TRUE			0.667632	0.0839458	0.700758	0.0873116	0.734542	0.0906878	0.768997	0.0940745	0.804137	0.0974717	0.839974	0.100879	0.727689	0.0899423	0.727689	0.0897799	0.727689	0.0901047			0.738508	0.0932318	0.722674	0.0936034	0.73391	0.0936512	0.755336	0.0971399	0.728283	0.0920238
ConcSwap	FALSE			0.667897	0.0839212	0.701039	0.0872859	0.734839	0.0906611	0.769311	0.0940468	0.804468	0.0974429	0.840323	0.10085	0.735205	0.0906878	0.735205	0.0905239	0.735205	0.0908516			0.728851	0.0923059	0.713982	0.0926642	0.725797	0.0926784	0.746086	0.0961959	0.723028	0.0913173
1st Symbol-row	1			0.668238	0.0839035	0.7014	0.0872675	0.735221	0.090642	0.769714	0.0940269	0.804893	0.0974224	0.840771	0.100828	0.742753	0.0914337	0.742753	0.0912685	0.742753	0.091599			0.719732	0.091346	0.705774	0.0917031	0.718136	0.0917047	0.737351	0.0952228	0.718524	0.0906379
				0.668626	0.0838944	0.701811	0.087258	0.735656	0.0906321	0.770174	0.0940166	0.805378	0.0974116	0.841283	0.100817	0.750334	0.0921802	0.750334	0.0920135	0.750334	0.0923468			0.711327	0.0903708	0.698209	0.0907387	0.711075	0.0907493	0.7293	0.0942394	0.714895	0.090004
				0.669031	0.0838944	0.70224	0.087258	0.736109	0.0906321	0.770653	0.0940166	0.805884	0.0974116	0.841815	0.100817	0.757948	0.0929272	0.757948	0.0927591	0.757948	0.0930952			0.7038	0.0893993	0.691437	0.0897898	0.704753	0.0898306	0.722092	0.0932648	0.71224	0.089433
				0.66942	0.0839035	0.702651	0.0872675	0.736545	0.090642	0.771113	0.0940269	0.806369	0.0974224	0.842326	0.100828	0.765596	0.0936747	0.765596	0.0935052	0.765596	0.0938442			0.697299	0.0884505	0.685587	0.088875	0.699291	0.0889666	0.715866	0.0923182	0.710631	0.0889403
				0.66976	0.0839212	0.703012	0.0872859	0.736926	0.0906611	0.771516	0.0940468	0.806794	0.0974429	0.842775	0.10085	0.773276	0.0944227	0.773276	0.0942518	0.773276	0.0945936			0.691948	0.0875427	0.680774	0.088012	0.694797	0.0881741	0.710742	0.0914178	0.710111	0.0885396
				0.670025	0.0839458	0.703293	0.0873116	0.737223	0.0906878	0.771829	0.0940745	0.807125	0.0974717	0.843123	0.100879	0.78099	0.0951712	0.78099	0.0949989	0.78099	0.0953435			0.687853	0.0866936	0.677092	0.0872176	0.691358	0.0874685	0.706822	0.0905812	0.710696	0.0882416
				0.670194	0.0839754	0.703471	0.0873424	0.737412	0.0907199	0.772028	0.0941079	0.807335	0.0975064	0.843345	0.100915	0.788738	0.0959203	0.788738	0.0957466	0.788738	0.096094			0.685094	0.0859198	0.674612	0.0865072	0.689041	0.0868636	0.704182	0.0898248	0.712368	0.0880545
				0.670251	0.0840077	0.703532	0.087376	0.737476	0.0907549	0.772097	0.0941442	0.807407	0.097544	0.843421	0.100954	0.796519	0.0966698	0.796519	0.0964947	0.796519	0.0968449			0.683723	0.0852363	0.673383	0.0858948	0.687891	0.0863711	0.702872	0.0891631	0.715083	0.0879834
				ConcTikEll	ConcTikEll	ConcTikEll	ConcTikEll	ConcTikEll	ConcTikEll	ConcTikEll	ConcTikEll	ConcTikEll	ConcTikEll	ConcTikEll	ConcTikEll	0.804334	0.0974199	0.804334	0.0972433	0.804334	0.0975964			0.683767	0.0846565	0.673428	0.0853922	0.68793	0.0860005	0.702918	0.0886092	0.718767	0.0880303
																0.812183	0.0981704	0.812183	0.0979925	0.812183	0.0983484			0.685227	0.0841916	0.674747	0.0850092	0.689158	0.0857593	0.704319	0.0881737	0.723318	0.0881939
																0.820066	0.0989215	0.820066	0.0987421	0.820066	0.0991009			0.688073	0.0838506	0.677314	0.0847532	0.69155	0.0856519	0.707049	0.0878651	0.728614	0.0884696
																0.827984	0.0996731	0.827984	0.0994923	0.827984	0.0998539			0.69225	0.0836403	0.681079	0.0846293	0.695061	0.0856805	0.711053	0.0876896	0.734508	0.0888501
																0.835936	0.100425	0.835936	0.100243	0.835936	0.100607			0.697676	0.0835646	0.685968	0.0846398	0.699621	0.0858446	0.716255	0.0876504	0.740841	0.0893249
																0.843922	0.101178	0.843922	0.100994	0.843922	0.101362			0.704246	0.0836251	0.691887	0.0847846	0.705143	0.0861409	0.722552	0.0877483	0.74744	0.089881
																0.851944	0.101931	0.851944	0.101746	0.851944	0.102116			0.711833	0.0838206	0.698721	0.0850608	0.711517	0.0865637	0.729822	0.0879815	0.754125	0.0905034
																0.86	0.102685	0.86	0.102498	0.86	0.102871			0.720288	0.0841473	0.706335	0.0854631	0.718622	0.0871048	0.737924	0.0883454	0.760713	0.0911749
																0.86	0.102685	0.86	0.102498	0.86	0.102871			0.729447	0.0845988	0.714583	0.0859836	0.726318	0.0877536	0.7467	0.0888329	0.767025	0.0918774
																IsoLine	IsoLine	ConcBand	ConcBand	ConcBand	ConcBand			0.739131	0.0851664	0.723304	0.0866122	0.734455	0.0884975	0.755979	0.0894345	0.772889	0.0925916
																								0.749153	0.0858389	0.732327	0.0873366	0.742875	0.089322	0.765581	0.0901385	0.778144	0.093298
																								0.759316	0.0866034	0.741478	0.0881428	0.751414	0.0902111	0.775318	0.0909313	0.782648	0.0939775
																								0.769424	0.0874449	0.750577	0.0890151	0.759906	0.0911474	0.785001	0.0917973	0.786276	0.0946114
																								0.77928	0.088347	0.759449	0.0899364	0.768186	0.0921128	0.794442	0.0927197	0.788932	0.0951824
																								0.788691	0.0892922	0.76792	0.0908889	0.776093	0.0930885	0.803457	0.0936807	0.790541	0.095675
																								0.797474	0.0902621	0.775826	0.091854	0.783472	0.0940554	0.811871	0.0946613	0.791061	0.0960758
																								0.80546	0.0912378	0.783012	0.092813	0.79018	0.0949947	0.819519	0.0956427
																								0.812491	0.0922003	0.789338	0.0937471	0.796086	0.0958882	0.826252	0.0966056
																								0.818432	0.0931309	0.794683	0.0946382	0.801076	0.0967185	0.831941	0.0975314
																								0.823166	0.0940115	0.79894	0.095469	0.805052	0.0974693	0.836473	0.098402
																								0.826601	0.0948249	0.802029	0.0962232	0.807937	0.0981262	0.839762	0.0992005
																								0.828672	0.0955553	0.803888	0.0968862	0.809675	0.0986763	0.841742	0.0999113
																								0.829336	0.0961885	0.804482	0.0974451	0.810232	0.0991088	0.842375	0.100521
																								Black	Black	Black	Black	Black	Black	Black	Black

## Sheet: Hoja7
383.333	0	0	445	0	413.958	0	413.958	0
386.667	0	0	445	5690.02	413.958	5690.02	413.958	5690.02
386.667	1
383.333	1
383.333	0
ErrBox	ErrBox
386.667	0
390	0
390	1
386.667	1
386.667	0
ErrBox	ErrBox
390	0
393.333	0
393.333	2
390	2
390	0
ErrBox	ErrBox
393.333	0
396.667	0
396.667	2
393.333	2
393.333	0
ErrBox	ErrBox
396.667	0
400	0
400	6
396.667	6
396.667	0
ErrBox	ErrBox
400	0
403.333	0
403.333	31
400	31
400	0
ErrBox	ErrBox
403.333	0
406.667	0
406.667	56
403.333	56
403.333	0
ErrBox	ErrBox
406.667	0
410	0
410	119
406.667	119
406.667	0
ErrBox	ErrBox
410	0
413.333	0
413.333	216
410	216
410	0
ErrBox	ErrBox
413.333	0
416.667	0
416.667	386
413.333	386
413.333	0
ErrBox	ErrBox
416.667	0
420	0
420	711
416.667	711
416.667	0
ErrBox	ErrBox
420	0
423.333	0
423.333	1039
420	1039
420	0
ErrBox	ErrBox
423.333	0
426.667	0
426.667	1607
423.333	1607
423.333	0
ErrBox	ErrBox
426.667	0
430	0
430	2171
426.667	2171
426.667	0
ErrBox	ErrBox
430	0
433.333	0
433.333	2912
430	2912
430	0
ErrBox	ErrBox
433.333	0
436.667	0
436.667	3602
433.333	3602
433.333	0
ErrBox	ErrBox
436.667	0
440	0
440	4145
436.667	4145
436.667	0
ErrBox	ErrBox
440	0
443.333	0
443.333	4506
440	4506
440	0
ErrBox	ErrBox
443.333	0
446.667	0
446.667	4513
443.333	4513
443.333	0
ErrBox	ErrBox
446.667	0
450	0
450	4162
446.667	4162
446.667	0
ErrBox	ErrBox
450	0
453.333	0
453.333	3531
450	3531
450	0
ErrBox	ErrBox
453.333	0
456.667	0
456.667	2747
453.333	2747
453.333	0
ErrBox	ErrBox
456.667	0
460	0
460	1740
456.667	1740
456.667	0
ErrBox	ErrBox
460	0
463.333	0
463.333	1029
460	1029
460	0
ErrBox	ErrBox
463.333	0
466.667	0
466.667	475
463.333	475
463.333	0
ErrBox	ErrBox
466.667	0
470	0
470	215
466.667	215
466.667	0
ErrBox	ErrBox
470	0
473.333	0
473.333	60
470	60
470	0
ErrBox	ErrBox
473.333	0
476.667	0
476.667	11
473.333	11
473.333	0
ErrBox	ErrBox
476.667	0
480	0
480	4
476.667	4
476.667	0
ErrBox	ErrBox

## Sheet: PlotDat7
Source sheet	all data	0.547115	0.071234	0	0	0.217708	0.0315113	0.591286	0.0762411	0.642083	0.0793319	0.667875	0.0819328	0.653655	0.0823852	0.680061	0.0813614	0.677064	0.0838091	0.699316	0.0843716	0.69515	0.0849133	0.739033	0.0897962	0.829336	0.0961885	0.804482	0.0974451	0.810232	0.0991088	0.842375	0.100521	0.842058	0.100262	0.863139	0.1022	0.858189	0.102246	0.896416	0.102684	0.87305	0.103465	0.877949	0.103875	0.873861	0.104516	0.863187	0.104792
Plot name	Concordia2	0.589216	0.0745225	0.125709	0.0188265	0.482812	0.0640155	0.589436	0.0765781	0.639865	0.0799788	0.665619	0.0825225	0.651572	0.082831	0.677326	0.0823471	0.674745	0.0845107	0.696847	0.0851409	0.692571	0.0857553	0.736012	0.090909	0.826294	0.0971314	0.801732	0.0982207	0.807672	0.099595	0.839454	0.101403	0.838929	0.101312	0.860321	0.102859	0.854869	0.103383	0.893215	0.103648	0.870059	0.104283	0.875122	0.104456	0.871062	0.105082	0.860223	0.105496
Plot Type	1	0.614086	0.0767854	0.267221	0.0380074	0.805631	0.097544	0.584157	0.0764822	0.633544	0.0801836	0.659189	0.0826475	0.645631	0.0828121	0.669493	0.0829112	0.668136	0.0847577	0.6898	0.0854523	0.685212	0.0861251	0.727358	0.0915564	0.817593	0.0975421	0.79389	0.0984549	0.800359	0.0995177	0.831112	0.101743	0.829985	0.101831	0.852269	0.102944	0.845373	0.103967	0.88406	0.104052	0.861521	0.104522	0.86704	0.104443	0.863062	0.105052	0.851767	0.10558
1st free col	203	0.603961	0.0770937	0.426523	0.0575494	1.19873	0.132129	0.575877	0.0759611	0.623631	0.0799298	0.649105	0.0822975	0.636315	0.0823298	0.657195	0.0830079	0.657772	0.0845301	0.678745	0.0852805	0.673669	0.0859928	0.713773	0.0916858	0.803939	0.0973871	0.781589	0.0981287	0.788885	0.0988831	0.818026	0.101511	0.81595	0.101776	0.839637	0.102446	0.830472	0.103951	0.869691	0.103863	0.848126	0.104161	0.854357	0.103839	0.850509	0.104429	0.838503	0.105037
Sigma Level	2	0.614388	0.0771426	0.60585	0.0774593	1.67741	0.167804	0.565267	0.075057	0.610931	0.079238	0.636184	0.081501	0.624378	0.0814234	0.64143	0.0826295	0.644492	0.0838464	0.664579	0.0846394	0.658878	0.085369	0.696358	0.0912868	0.786437	0.0966791	0.765827	0.0972684	0.774179	0.0977427	0.801255	0.100728	0.79796	0.101151	0.823447	0.101407	0.811371	0.103336	0.851273	0.103097	0.830961	0.103231	0.838101	0.102691	0.83442	0.103263	0.821505	0.10391
Absolute Errs	FALSE	0.621788	0.0788993	0.80772	0.097744	2.2603	0.204603	0.553186	0.0738433	0.596471	0.0781641	0.621473	0.0803224	0.610786	0.0801662	0.623473	0.0818065	0.629374	0.0827618	0.648448	0.083581	0.642036	0.0843044	0.676523	0.0903917	0.766507	0.0954754	0.747881	0.0959438	0.757434	0.0961889	0.782159	0.0994554	0.777473	0.100009	0.805012	0.0999102	0.789619	0.102172	0.830298	0.101815	0.811414	0.101805	0.819589	0.101094	0.816099	0.101649	0.802151	0.102292
Symbol Type	1	0.640336	0.079488	1.03497	0.118411	2.97009	0.242562	0.540613	0.0724181	0.581423	0.0767952	0.606163	0.0788573	0.596642	0.0786601	0.604781	0.0806057	0.613641	0.0813644	0.631661	0.082191	0.624508	0.082885	0.655875	0.0890731	0.745762	0.0938735	0.729204	0.0942622	0.740004	0.0943475	0.762285	0.0977976	0.75615	0.0984397	0.785824	0.0980777	0.766978	0.100554	0.808466	0.100122	0.791071	0.100001	0.800321	0.0991763	0.79703	0.0997174	0.782009	0.100312
Inverse Plot	FALSE	0.633569	0.0799267	1.29078	0.139466	3.83441	0.281716	0.528567	0.070897	0.567007	0.0752422	0.591495	0.0772243	0.583091	0.0770271	0.586867	0.0791243	0.598568	0.0797672	0.615576	0.080582	0.607715	0.081226	0.636087	0.0874377	0.725883	0.0920033	0.71131	0.0923599	0.723303	0.0923677	0.743242	0.0958886	0.735716	0.0965718	0.767439	0.0960576	0.745281	0.0986118	0.787544	0.0981545	0.771579	0.0979644	0.781857	0.0970932	0.778757	0.0976247	0.76271	0.0981324
Color Plot	FALSE	0.66649	0.0851634	1.57875	0.160918	4.8869	0.322105	0.518024	0.0694033	0.55439	0.0736309	0.578658	0.0755558	0.57123	0.0753995	0.571182	0.0774824	0.585376	0.0780997	0.601497	0.0788844	0.593016	0.0794618	0.618762	0.0856181	0.70848	0.0900161	0.695648	0.0903909	0.708684	0.09041	0.726574	0.093883	0.717829	0.0945564	0.751345	0.0940137	0.726288	0.0965034	0.769228	0.0960719	0.754518	0.0958595	0.765694	0.0950138	0.762761	0.0955405	0.745818	0.0959286
3D plot	FALSE	0.756452	0.0905606	1.90293	0.182774	6.16853	0.363766	0.509838	0.0680578	0.544594	0.0720918	0.56869	0.0739869	0.562021	0.0739091	0.558998	0.075813	0.575134	0.076497	0.590565	0.0772356	0.581602	0.0777352	0.605304	0.0837617	0.694964	0.0880731	0.683487	0.0885147	0.697331	0.0886329	0.71363	0.0919432	0.703936	0.0925566	0.738847	0.0921113	0.711535	0.0943996	0.755002	0.0940431	0.741269	0.0938572	0.753141	0.0931063	0.750338	0.0936336	0.732702	0.0938795
Linear	FALSE	0.738864	0.0915371	2.26785	0.205042	7.72917	0.40674	0.504671	0.0669697	0.538413	0.0707497	0.562401	0.0726447	0.55621	0.0726768	0.551301	0.0742512	0.568672	0.075089	0.583665	0.0757694	0.574399	0.0761861	0.596803	0.0820188	0.686429	0.0863316	0.675812	0.0868834	0.690163	0.0871803	0.70546	0.0902265	0.695164	0.0907345	0.730957	0.0905048	0.70222	0.0924708	0.746019	0.0922323	0.732905	0.0921198	0.745214	0.0915254	0.742495	0.0920585	0.724424	0.092151
Data Range	AC3:AG102	0.748997	0.0926394	2.67865	0.227729	9.62957	0.451068	0.502943	0.066227	0.536349	0.0697132	0.560298	0.0716379	0.554268	0.0718023	0.548715	0.0729238	0.566513	0.0739896	0.581356	0.0746044	0.571989	0.0749401	0.593948	0.0805307	0.683568	0.0849327	0.673246	0.0856291	0.687761	0.08617	0.702725	0.0888719	0.692223	0.0892376	0.728314	0.0893242	0.699095	0.0908733	0.743005	0.0907863	0.730106	0.0907881	0.742557	0.0903992	0.739866	0.0909429	0.721654	0.0908832
Filled Symbols	FALSE	0.77255	0.0946962	3.14109	0.250842	11.9437	0.496793	0.504793	0.06589	0.538567	0.0690663	0.562553	0.0710482	0.556351	0.0713565	0.55145	0.0719381	0.568832	0.073288	0.583825	0.0738351	0.574568	0.0740981	0.596969	0.0794179	0.68661	0.0839898	0.675995	0.0848534	0.690321	0.0856839	0.705646	0.0879892	0.695352	0.0881873	0.731132	0.0886651	0.702415	0.0897364	0.746206	0.0898223	0.733096	0.0899698	0.745384	0.0898189	0.742665	0.0903771	0.724618	0.0901788
ConcAge	FALSE	0.767141	0.0947496	3.66167	0.274391	14.7617	0.543959	0.510072	0.0659859	0.544888	0.0688614	0.568984	0.0709232	0.562291	0.0713754	0.559283	0.071374	0.575441	0.073041	0.590872	0.0735237	0.581927	0.0737283	0.605623	0.0787705	0.695311	0.0835791	0.683838	0.0846192	0.697634	0.0857612	0.713988	0.0876498	0.704296	0.0876687	0.739184	0.0885811	0.71191	0.0891523	0.755361	0.0894184	0.741635	0.0897313	0.753467	0.0898314	0.750665	0.0904069	0.733074	0.0900949
ConcSwap	FALSE	0.795726	0.0957623	4.24768	0.298384	18.1931	0.592611	0.518352	0.066507	0.554801	0.0691152	0.579068	0.0712732	0.571607	0.0718577	0.571581	0.0712773	0.585805	0.0732686	0.601927	0.0736955	0.593469	0.0738606	0.619208	0.0786411	0.708965	0.0837341	0.696138	0.0849455	0.709108	0.0863958	0.727075	0.0878813	0.718332	0.0877237	0.751816	0.0890788	0.726812	0.0891683	0.76973	0.0896072	0.755029	0.090092	0.76615	0.0904359	0.763218	0.09103	0.746338	0.0906382
1st Symbol-row	1	0.778642	0.0965597	4.90736	0.322828	22.3716	0.642797	0.528963	0.0674111	0.567501	0.0698071	0.591989	0.0720697	0.583545	0.0727641	0.587347	0.0716557	0.599084	0.0739523	0.616093	0.0743366	0.608261	0.0744844	0.636623	0.0790401	0.726467	0.0844421	0.7119	0.0858057	0.723814	0.0875362	0.743845	0.0886649	0.736321	0.0883479	0.768006	0.090118	0.745913	0.0897832	0.788148	0.0903734	0.772195	0.0910225	0.782406	0.0915832	0.779307	0.0921958	0.763336	0.0917648
		0.81971	0.0967352	5.64997	0.347732	27.4597	0.694563	0.541043	0.0686248	0.581961	0.070881	0.6067	0.0732483	0.597136	0.0740213	0.605303	0.0724787	0.614203	0.0750369	0.632224	0.0753951	0.625102	0.075549	0.656458	0.0799352	0.746397	0.0856458	0.729846	0.0871303	0.74056	0.08909	0.762941	0.0899371	0.756808	0.0894907	0.786441	0.0916144	0.767665	0.090947	0.809122	0.0916551	0.791741	0.0924476	0.800917	0.0931805	0.797628	0.0938099	0.78269	0.0933833
		0.801578	0.0971265	6.48594	0.373105	IsoLine	IsoLine	0.553616	0.07005	0.597009	0.0722498	0.62201	0.0747134	0.61128	0.0755274	0.623995	0.0736795	0.629936	0.0764343	0.649011	0.0767851	0.64263	0.0769684	0.677106	0.0812538	0.767142	0.0872477	0.748523	0.0888119	0.757989	0.0909314	0.782815	0.0915949	0.778132	0.0910596	0.805629	0.0934469	0.790306	0.0925655	0.830955	0.0933483	0.812084	0.0942517	0.820186	0.0950984	0.816697	0.0957416	0.802832	0.0953627
		0.810253	0.0971373	7.42699	0.398955			0.565662	0.0715711	0.611425	0.0738028	0.636677	0.0763464	0.624832	0.0771604	0.64191	0.0751609	0.645009	0.0780315	0.665096	0.0783941	0.659424	0.0786274	0.696894	0.0828892	0.787021	0.0891179	0.766417	0.0907143	0.77469	0.0929112	0.801858	0.0935039	0.798565	0.0929274	0.824014	0.095467	0.812002	0.0945077	0.851877	0.0953159	0.831576	0.0962887	0.838649	0.0971815	0.83497	0.0978343	0.822131	0.0975426
		0.806863	0.0977295	8.48634	0.425293			0.576205	0.0730648	0.624042	0.0754142	0.649515	0.0780149	0.636692	0.078788	0.657594	0.0768028	0.658201	0.079699	0.679175	0.0800917	0.674123	0.0803916	0.714219	0.0847088	0.804424	0.0911051	0.782079	0.0926833	0.789309	0.0948689	0.818526	0.0955095	0.816452	0.0949429	0.840108	0.097511	0.830996	0.096616	0.870192	0.0973985	0.848638	0.0983936	0.854813	0.0992609	0.850966	0.0999186	0.839022	0.0997464
		0.79242	0.0978375	9.67886	0.452126			0.584392	0.0744103	0.633838	0.0769532	0.659483	0.0795839	0.645901	0.0802784	0.669778	0.0784722	0.668443	0.0813016	0.690107	0.0817404	0.685536	0.0821182	0.727677	0.0865652	0.81794	0.0930481	0.79424	0.0945594	0.800663	0.096646	0.83147	0.0974493	0.830345	0.0969427	0.852606	0.0994133	0.845748	0.0987198	0.884418	0.0994274	0.861887	0.100396	0.867366	0.101168	0.863388	0.101825	0.852139	0.101796
		0.793293	0.0978667	11.0213	0.479464			0.589558	0.0754984	0.640019	0.0782954	0.665772	0.0809261	0.651712	0.0815107	0.677475	0.0800339	0.674905	0.0827097	0.697007	0.0832066	0.69274	0.0836673	0.736178	0.0883081	0.826474	0.0947896	0.801915	0.0961908	0.807831	0.0980986	0.83964	0.099166	0.839117	0.0987648	0.860496	0.10102	0.855064	0.100649	0.893402	0.101238	0.87025	0.102133	0.875292	0.102749	0.871232	0.103401	0.860417	0.103524
		0.80574	0.098299	12.5325	0.507317			0.591286	0.0762411	0.642083	0.0793319	0.667875	0.0819328	0.653655	0.0823852	0.680061	0.0813614	0.677064	0.0838091	0.699316	0.0843716	0.69515	0.0849133	0.739033	0.0897962	0.829336	0.0961885	0.804482	0.0974451	0.810232	0.0991088	0.842375	0.100521	0.842058	0.100262	0.863139	0.1022	0.858189	0.102246	0.896416	0.102684	0.87305	0.103465	0.877949	0.103875	0.873861	0.104516	0.863187	0.104792
		0.805901	0.0984687	14.2336	0.535695			Black	Black	Black	Black	Black	Black	Black	Black	Black	Black	Black	Black	Black	Black	Black	Black	Black	Black	Black	Black	Black	Black	Black	Black	Black	Black	Black	Black	Black	Black	Black	Black	Black	Black	Black	Black	Black	Black	Black	Black	Black	Black
		0.813476	0.0985388	16.1487	0.564607
		0.82081	0.0986779	18.3044	0.594063
		0.858175	0.0997418	20.7311	0.624073
		0.836118	0.100245	23.4629	0.654649
		0.832415	0.100377	26.5382	0.6858
		0.856025	0.100527	30	0.717538
		0.845896	0.1007	30	0.717538
		0.830557	0.100859	IsoLine	IsoLine
		0.843705	0.101133
		0.844952	0.101139
		0.879233	0.101628
		0.830548	0.101757
		0.839368	0.101929
		0.851452	0.102392
		0.862749	0.103211
		0.900191	0.103514
		0.877883	0.103815
		0.855362	0.103998
		0.877125	0.104907
		0.889934	0.105247
		0.882284	0.105622
		0.928994	0.106128
		0.923116	0.106955
		0.887418	0.107269
		0.900829	0.108382
		0.929977	0.109118
		0.936559	0.109466
		0.935939	0.111376
		0.986744	0.112846
		0.971921	0.112885
		1.00163	0.118112
		1.06318	0.118289
		1.03353	0.119463
		1.09767	0.12381
		1.08151	0.124231
		1.15221	0.126416
		1.21528	0.129353
		1.24233	0.134182
		1.23801	0.13472
		1.22215	0.137345
		1.24225	0.137602
		1.3179	0.143459
		1.41502	0.148393
		1.38463	0.14888
		1.45104	0.15497
		1.61536	0.165904
		1.62529	0.16629
		1.88983	0.183745
		1.79486	0.170783
		2.72898	0.22047
		4.03745	0.28537
		4.36743	0.304989
		5.55507	0.347622
		5.82097	0.35837
		5.2184	0.316795
		5.42221	0.320308
		5.91812	0.347821
		6.13375	0.358308
		6.42728	0.371136
		6.58157	0.379228
		6.57031	0.37832
		7.20686	0.412228
		7.10881	0.398591
		6.44235	0.359103
		7.91694	0.43369
		8.22241	0.42844
		8.79332	0.412882
		12.0157	0.493554
		11.8763	0.473844
		12.9418	0.498511
		14.7801	0.564268
		16.393	0.549069
		22.6268	0.613934
		IsoLine	IsoLine
[truncated: 152 more columns]

## Sheet: PlotDat8
Source sheet	all data	0.547115	0.071234	0.447683	0.06	0.482812	0.0640155	0.591286	0.0762411	0.642083	0.0793319	0.667875	0.0819328	0.653655	0.0823852	0.680061	0.0813614	0.677064	0.0838091	0.699316	0.0843716	0.69515	0.0849133	0.739033	0.0897962	0.829336	0.0961885	0.804482	0.0974451	0.810232	0.0991088	0.842375	0.100521	0.842058	0.100262	0.863139	0.1022	0.858189	0.102246	0.896416	0.102684	0.87305	0.103465	0.877949	0.103875	0.873861	0.104516	0.863187	0.104792
Plot name	Concordia3	0.589216	0.0745225	0.457846	0.0611736	0.557657	0.0723004	0.590276	0.07653	0.640872	0.0798479	0.666643	0.0824094	0.652517	0.0827568	0.678571	0.0821228	0.675797	0.0843663	0.697968	0.0849786	0.693742	0.0855748	0.737995	0.0904928	0.827677	0.0969296	0.80298	0.098065	0.808835	0.0995196	0.840781	0.101219	0.840981	0.100931	0.861601	0.102739	0.857047	0.102967	0.89467	0.103443	0.871418	0.10412	0.876407	0.104358	0.872334	0.104988	0.861569	0.105368
Plot Type	1	0.614086	0.0767854	0.482812	0.0640155	0.636279	0.0806498	0.587379	0.0765876	0.637402	0.0801312	0.663114	0.0826402	0.649257	0.0828808	0.674276	0.0826665	0.67217	0.0846847	0.694102	0.0853457	0.689704	0.0859894	0.735007	0.091044	0.822905	0.0973924	0.798677	0.0983996	0.804824	0.0996297	0.836204	0.101632	0.837891	0.101431	0.857184	0.102972	0.853766	0.103514	0.889649	0.103909	0.866733	0.104469	0.871974	0.104525	0.867945	0.105143	0.856929	0.105614
1st free col	231	0.603961	0.0770937	0.508205	0.0668651	0.718871	0.0890642	0.582723	0.0764111	0.631827	0.0801694	0.657443	0.0826151	0.644018	0.0827519	0.667364	0.0829687	0.666341	0.0847501	0.687885	0.0854567	0.683213	0.0861391	0.73015	0.0914348	0.815228	0.0975566	0.791759	0.0984343	0.798372	0.0994343	0.828845	0.101742	0.83287	0.101749	0.850081	0.10289	0.848436	0.103871	0.881571	0.104062	0.859201	0.104497	0.864843	0.104369	0.860888	0.104974	0.849469	0.105521
Sigma Level	2	0.614388	0.0771426	0.534033	0.0697224	0.805631	0.097544	0.57651	0.0760084	0.624389	0.0799608	0.649876	0.0823352	0.637027	0.0823758	0.658136	0.0830164	0.658564	0.0845599	0.67959	0.0853069	0.674552	0.0860173	0.723556	0.0916545	0.804983	0.097415	0.782529	0.0981676	0.789763	0.0989419	0.819026	0.101544	0.826056	0.101876	0.840603	0.102497	0.841202	0.104028	0.87079	0.103894	0.84915	0.104203	0.855327	0.103897	0.851469	0.104488	0.839517	0.105092
Absolute Errs	FALSE	0.621788	0.0788993	0.560304	0.0725872	0.89677	0.10609	0.569012	0.075397	0.615414	0.0795145	0.640746	0.0818128	0.628592	0.0817688	0.646996	0.0828073	0.64918	0.0841223	0.66958	0.0849028	0.6641	0.0856292	0.715406	0.0916972	0.792616	0.0969739	0.771392	0.097611	0.779371	0.0981741	0.807176	0.101047	0.817636	0.101809	0.829163	0.101809	0.832262	0.103981	0.857776	0.103414	0.837021	0.1036	0.84384	0.103129	0.8401	0.103707	0.827506	0.104346
Symbol Type	1	0.640336	0.079488	0.587024	0.0754598	0.99251	0.114702	0.560558	0.0746037	0.605294	0.07885	0.63045	0.0810707	0.61908	0.0809574	0.634431	0.0823507	0.638599	0.0834564	0.658292	0.084262	0.652313	0.084992	0.705921	0.0915617	0.778669	0.0962524	0.758832	0.0967891	0.767653	0.0971644	0.793812	0.100272	0.807838	0.101549	0.816261	0.100857	0.821859	0.103733	0.843098	0.102641	0.823342	0.102714	0.830886	0.1021	0.827279	0.102665	0.813961	0.103315
Inverse Plot	FALSE	0.633569	0.0799267	0.614202	0.07834	1.09308	0.123382	0.551516	0.0736631	0.594472	0.0779964	0.619439	0.0801412	0.608907	0.0799772	0.620991	0.0816664	0.627284	0.0825913	0.646218	0.0834126	0.639708	0.0841334	0.695361	0.0912516	0.763751	0.0952823	0.7454	0.0957375	0.755118	0.0959569	0.779519	0.099254	0.79693	0.101104	0.802463	0.0996823	0.810278	0.103288	0.827398	0.101611	0.808712	0.101584	0.81703	0.100854	0.813566	0.101407	0.799475	0.102045
Color Plot	FALSE	0.66649	0.0851634	0.641846	0.081228	1.19873	0.132129	0.542281	0.0726163	0.58342	0.076991	0.608194	0.0790651	0.598519	0.078871	0.607261	0.0807844	0.615728	0.0815649	0.633888	0.0823916	0.626834	0.0830909	0.684013	0.0907754	0.748514	0.0941057	0.731682	0.0945024	0.742317	0.0946044	0.764922	0.0980363	0.785209	0.100485	0.78837	0.0983363	0.797833	0.10266	0.811363	0.100367	0.79377	0.100259	0.802877	0.0994451	0.79956	0.0999879	0.784681	0.100591
3D plot	FALSE	0.756452	0.0905606	0.669963	0.0841237	1.30971	0.140944	0.533258	0.0715091	0.572621	0.0758777	0.597207	0.0778894	0.588368	0.0776871	0.593843	0.0797433	0.604437	0.080422	0.62184	0.0812438	0.614254	0.0819101	0.672187	0.0901462	0.733624	0.0927742	0.718278	0.0931377	0.729807	0.0931661	0.750658	0.0966728	0.772996	0.0997099	0.774598	0.0968779	0.784865	0.101866	0.795692	0.0989647	0.77917	0.0987968	0.789047	0.0979356	0.785873	0.0984704	0.770225	0.0990173
Linear	FALSE	0.738864	0.0915371	0.698561	0.0870271	1.42629	0.149828	0.524841	0.07039	0.562547	0.0747051	0.586958	0.0766654	0.578898	0.0764773	0.581323	0.0785885	0.593905	0.0792125	0.6106	0.0800192	0.602519	0.0806427	0.660206	0.089381	0.719732	0.091346	0.705774	0.0917031	0.718136	0.0917047	0.737351	0.0952228	0.760623	0.0987995	0.76175	0.0953707	0.771727	0.100926	0.78107	0.0974648	0.765549	0.0972618	0.776144	0.0963912	0.773103	0.0969205	0.756739	0.0973915
Data Range	AC3:AG102	0.748997	0.0926394	0.727649	0.0899383	IsoLine	IsoLine	0.517397	0.0693077	0.553639	0.0735246	0.577894	0.0754466	0.570524	0.0752944	0.570249	0.0773705	0.584591	0.0779894	0.600659	0.0787714	0.592141	0.0793439	0.648396	0.0885009	0.707444	0.0898834	0.694715	0.0902611	0.707814	0.0902842	0.725582	0.0937498	0.748427	0.0977787	0.750387	0.0938806	0.758778	0.0998681	0.768138	0.0959331	0.753502	0.0957209	0.764732	0.0948794	0.761809	0.095406	0.744813	0.0957852
Filled Symbols	FALSE	0.77255	0.0946962	0.757235	0.0928574			0.511251	0.0683095	0.546286	0.0723877	0.570412	0.0742864	0.563612	0.0741902	0.561103	0.0761425	0.576902	0.076806	0.592453	0.0775549	0.583573	0.0780706	0.63708	0.0875296	0.697299	0.0884505	0.685587	0.088875	0.699291	0.0889666	0.715866	0.0923182	0.736742	0.0966752	0.741005	0.0924728	0.746371	0.0987196	0.757459	0.0944365	0.743557	0.0942414	0.755309	0.0934663	0.752484	0.093993	0.734967	0.0942686
ConcAge	FALSE	0.767141	0.0947496	0.787328	0.0957842			0.506673	0.0674393	0.540809	0.0713441	0.564838	0.0732353	0.558462	0.0732128	0.554286	0.0749583	0.571176	0.0757141	0.586339	0.0764229	0.577191	0.0768785	0.626566	0.0864939	0.689738	0.0871097	0.678787	0.0876052	0.692941	0.0878096	0.708627	0.0909905	0.725886	0.0955192	0.734015	0.0912087	0.734843	0.0975122	0.749502	0.0930403	0.736147	0.0928881	0.748287	0.0922136	0.745535	0.0927434	0.727632	0.092908
ConcSwap	FALSE	0.795726	0.0957623	0.817937	0.0987189			0.503863	0.0667348	0.537447	0.0704394	0.561417	0.0723395	0.555302	0.0724051	0.550096	0.0738695	0.567661	0.0747614	0.582585	0.0754249	0.573272	0.0758196	0.617142	0.0854218	0.685094	0.0859198	0.674612	0.0865072	0.689041	0.0868636	0.704182	0.0898248	0.716156	0.0943423	0.729722	0.0901437	0.724511	0.0962787	0.744612	0.0918056	0.731597	0.0917199	0.743974	0.0911762	0.741267	0.0917116	0.723129	0.0917629
1st Symbol-row	1	0.778642	0.0965597	0.849069	0.101661			0.502943	0.066227	0.536349	0.0697132	0.560298	0.0716379	0.554268	0.0718023	0.548715	0.0729238	0.566513	0.0739896	0.581356	0.0746044	0.571989	0.0749401	0.609063	0.0843427	0.683568	0.0849327	0.673246	0.0856291	0.687761	0.08617	0.702725	0.0888719	0.707816	0.0931764	0.728314	0.0893242	0.715655	0.095053	0.743005	0.0907863	0.730106	0.0907881	0.742557	0.0903992	0.739866	0.0909429	0.721654	0.0908832
		0.81971	0.0967352	0.880735	0.104612			0.503953	0.065938	0.53756	0.0691971	0.56153	0.0711613	0.555405	0.0714307	0.550205	0.0721624	0.567779	0.0734323	0.582704	0.0739974	0.573397	0.0742786	0.602551	0.083286	0.685227	0.0841916	0.674747	0.0850092	0.689158	0.0857593	0.704319	0.0881737	0.701095	0.0920535	0.729852	0.0887861	0.708517	0.0938683	0.74475	0.0900271	0.731738	0.0901332	0.744099	0.0899167	0.741393	0.0904708	0.723272	0.0903074
		0.801578	0.0971265	0.912942	0.10757			0.50685	0.0658805	0.54103	0.0689138	0.565059	0.0709305	0.558665	0.0713067	0.5545	0.0716187	0.571407	0.073114	0.58657	0.0736304	0.577435	0.073864	0.597782	0.0822805	0.689999	0.0837288	0.67905	0.0846745	0.69317	0.0856492	0.708896	0.0877605	0.696175	0.0910041	0.734269	0.0885528	0.703293	0.0927571	0.749771	0.089561	0.736422	0.0897841	0.748532	0.0897499	0.745781	0.0903159	0.727912	0.0900608
		0.810253	0.0971373	0.945702	0.110536			0.511507	0.066057	0.546605	0.0688756	0.57073	0.0709556	0.563905	0.0714355	0.561413	0.0713165	0.577236	0.0730485	0.592787	0.0735193	0.583926	0.0737143	0.594888	0.0813536	0.697676	0.0835646	0.685968	0.0846398	0.699621	0.0858446	0.716255	0.0876504	0.69319	0.0900568	0.741372	0.0886347	0.700123	0.0917496	0.757849	0.0894085	0.743954	0.0897558	0.755663	0.0899058	0.752839	0.090485	0.735371	0.090154
		0.806863	0.0977295	0.979022	0.113511			0.517719	0.0664597	0.554043	0.0690843	0.578297	0.0712355	0.570895	0.0718117	0.570641	0.0712688	0.585013	0.0732388	0.601082	0.0736691	0.592587	0.0738361	0.593948	0.0805307	0.707921	0.0837062	0.695198	0.0849066	0.708231	0.0863369	0.726074	0.0878483	0.692223	0.0892376	0.75085	0.0890281	0.699095	0.0908733	0.768631	0.0895762	0.754005	0.0900496	0.76518	0.0903779	0.762258	0.0909707	0.745324	0.0905831
		0.79242	0.0978375	1.01291	0.116493			0.525217	0.0670711	0.563018	0.0695306	0.587427	0.0717579	0.579331	0.0724187	0.58178	0.0714779	0.594396	0.0736764	0.611092	0.0740733	0.603039	0.0742242	0.594985	0.0798341	0.720288	0.0841473	0.706335	0.0854631	0.718622	0.0871048	0.737924	0.0883454	0.6933	0.0885687	0.76229	0.0897158	0.700237	0.0901521	0.781645	0.0900567	0.766135	0.0906528	0.776666	0.0911453	0.773627	0.0917519	0.757335	0.0913292
		0.793293	0.0978667	1.04738	0.119483			0.533671	0.0678644	0.573138	0.070195	0.597723	0.0725001	0.588842	0.0732301	0.594345	0.0719345	0.604977	0.0743423	0.62238	0.074714	0.614825	0.0748614	0.597974	0.0792829	0.734235	0.0848688	0.718895	0.0862851	0.730341	0.0881145	0.751288	0.0891201	0.696391	0.0880685	0.775191	0.0906677	0.703518	0.0896056	0.796323	0.0908292	0.779813	0.0915388	0.789621	0.0921747	0.786448	0.0927943	0.77088	0.0923597
		0.80574	0.098299	1.08245	0.122481			0.542713	0.068805	0.58396	0.0710486	0.608734	0.0734295	0.599015	0.0742102	0.607786	0.0726188	0.616293	0.0752074	0.634454	0.0755635	0.627431	0.07572	0.602831	0.0788921	0.749153	0.0858389	0.732327	0.0873366	0.742875	0.089322	0.765581	0.0901385	0.701411	0.0877504	0.78899	0.0918424	0.708848	0.0892489	0.812022	0.0918598	0.794443	0.0926691	0.803477	0.0934209	0.800161	0.0940523	0.785365	0.0936297
		0.805901	0.0984687	1.11811	0.125487			0.551948	0.0698518	0.595012	0.0720541	0.619979	0.0745056	0.609404	0.0753165	0.621515	0.0735008	0.627849	0.0762338	0.646784	0.0765844	0.640305	0.0767625	0.609425	0.0786724	0.76439	0.0870155	0.746045	0.0885717	0.755676	0.0906745	0.780178	0.0913562	0.708225	0.0876233	0.803083	0.0931883	0.716081	0.0890916	0.828058	0.0931034	0.809385	0.0939942	0.817629	0.0948296	0.814167	0.0954711	0.80016	0.0950835
		0.813476	0.0985388	1.15438	0.128501			0.560971	0.0709589	0.605811	0.0731674	0.630966	0.0756814	0.619555	0.0765004	0.634933	0.0745419	0.63914	0.0773767	0.658832	0.0777322	0.652884	0.0779433	0.617575	0.0786297	0.77928	0.088347	0.759449	0.0899364	0.768186	0.0921128	0.794442	0.0927197	0.716645	0.0876906	0.816855	0.0946467	0.725022	0.089138	0.843729	0.0945058	0.823986	0.0954562	0.831459	0.0963391	0.827854	0.0969886	0.814616	0.0966577
		0.82081	0.0986779	1.19128	0.131524			0.569389	0.0720781	0.615885	0.0743399	0.641215	0.0769054	0.629024	0.0777102	0.647453	0.0756967	0.649672	0.0785862	0.670072	0.0789568	0.664619	0.0792107	0.62706	0.0787652	0.793172	0.0897752	0.771953	0.0913711	0.779857	0.0935742	0.80775	0.0941697	0.726443	0.0879504	0.829703	0.0961539	0.735424	0.0893869	0.85835	0.0960056	0.837607	0.0969912	0.844362	0.0978835	0.840624	0.0985385	0.828101	0.0982835
		0.858175	0.0997418	1.2288	0.134554			0.576833	0.0731604	0.624793	0.0755204	0.650279	0.0781241	0.637398	0.0788931	0.658528	0.0769147	0.658986	0.0798093	0.680013	0.0802046	0.674998	0.0805095	0.63762	0.0790753	0.80546	0.0912378	0.783012	0.092813	0.79018	0.0949947	0.819519	0.0956427	0.737351	0.0883957	0.841066	0.097644	0.747006	0.0898314	0.871283	0.0975373	0.849653	0.0985321	0.855775	0.0993953	0.851918	0.100053	0.840028	0.0998898
		0.836118	0.100245	1.26697	0.137593			0.582978	0.0741585	0.632146	0.0766574	0.657761	0.0792843	0.644311	0.0799973	0.667674	0.0781427	0.666674	0.0809927	0.688219	0.0814211	0.683565	0.0817828	0.648968	0.0795515	0.815605	0.0926707	0.79214	0.0941991	0.798702	0.0963123	0.829235	0.0970743	0.749072	0.0890144	0.850448	0.0990518	0.759451	0.0904594	0.881961	0.099034	0.859599	0.100012	0.865198	0.100808	0.861243	0.101466	0.849874	0.101406
		0.832415	0.100377	1.30579	0.140639			0.587556	0.0750288	0.637623	0.077701	0.663335	0.0803354	0.64946	0.0809747	0.67449	0.0793269	0.672401	0.0820846	0.694333	0.0825531	0.689948	0.0829749	0.660794	0.0801807	0.823166	0.0940115	0.79894	0.095469	0.805052	0.0974693	0.836473	0.098402	0.761285	0.0897894	0.857438	0.100316	0.772419	0.0912539	0.889919	0.10043	0.867008	0.101365	0.872219	0.102061	0.868191	0.102716	0.857209	0.102767
		0.856025	0.100527	1.34528	0.143694			0.590366	0.0757333	0.640985	0.0786056	0.666756	0.0812312	0.652621	0.0817824	0.678681	0.0804157	0.675915	0.0830373	0.698087	0.0835511	0.693867	0.0840338	0.672775	0.0809459	0.82781	0.0952014	0.803115	0.0965669	0.808952	0.0984153	0.840918	0.0995677	0.773659	0.0906998	0.861731	0.101381	0.785557	0.092193	0.894808	0.101665	0.871558	0.102533	0.876533	0.103099	0.872459	0.103747	0.861712	0.103912
		0.845896	0.1007	1.38544	0.146757			0.591286	0.0762411	0.642083	0.0793319	0.667875	0.0819328	0.653655	0.0823852	0.680061	0.0813614	0.677064	0.0838091	0.699316	0.0843716	0.69515	0.0849133	0.684584	0.081826	0.829336	0.0961885	0.804482	0.0974451	0.810232	0.0991088	0.842375	0.100521	0.785854	0.0917206	0.863139	0.1022	0.798506	0.0932513	0.896416	0.102684	0.87305	0.103465	0.877949	0.103875	0.873861	0.104516	0.863187	0.104792
		0.830557	0.100859	1.42629	0.149828			Black	Black	Black	Black	Black	Black	Black	Black	Black	Black	Black	Black	Black	Black	Black	Black	0.695901	0.0827973	Black	Black	Black	Black	Black	Black	Black	Black	0.797539	0.0928241	Black	Black	0.810913	0.0943998	Black	Black	Black	Black	Black	Black	Black	Black	Black	Black
		0.843705	0.101133	1.42861	0.15																			0.706414	0.083833									0.808395	0.09398			0.82244	0.0956073
		0.844952	0.101139	IsoLine	IsoLine																			0.715839	0.0849051									0.818125	0.095157			0.832773	0.0968407
		0.879233	0.101628																					0.723918	0.0859842									0.826465	0.0963229			0.841629	0.0980665
		0.830548	0.101757																					0.73043	0.0870409									0.833187	0.0974458			0.848766	0.0992511
		0.839368	0.101929																					0.735199	0.0880464									0.838107	0.0984952			0.853991	0.100362
		0.851452	0.102392																					0.738093	0.0889733									0.841091	0.0994425			0.857161	0.10137
		0.862749	0.103211																					0.739033	0.0897962									0.842058	0.100262			0.858189	0.102246
		0.900191	0.103514																					Black	Black									Black	Black			Black	Black
		0.877883	0.103815
		0.855362	0.103998
		0.877125	0.104907
		0.889934	0.105247
		0.882284	0.105622
		0.928994	0.106128
		0.923116	0.106955
		0.887418	0.107269
		0.900829	0.108382
		0.929977	0.109118
		0.936559	0.109466
		0.935939	0.111376
		0.986744	0.112846
		0.971921	0.112885
		1.00163	0.118112
		1.06318	0.118289
		1.03353	0.119463
		1.09767	0.12381
		1.08151	0.124231
		1.15221	0.126416
		1.21528	0.129353
		1.24233	0.134182
		1.23801	0.13472
		1.22215	0.137345
		1.24225	0.137602
		1.3179	0.143459
		1.41502	0.148393
		1.38463	0.14888
		1.45104	0.15497
		1.61536	0.165904
		1.62529	0.16629
		1.88983	0.183745
		1.79486	0.170783
		2.72898	0.22047
		4.03745	0.28537
		4.36743	0.304989
		5.55507	0.347622
		5.82097	0.35837
		5.2184	0.316795
		5.42221	0.320308
		5.91812	0.347821
		6.13375	0.358308
		6.42728	0.371136
		6.58157	0.379228
		6.57031	0.37832
		7.20686	0.412228
		7.10881	0.398591
		6.44235	0.359103
		7.91694	0.43369
		8.22241	0.42844
		8.79332	0.412882
		12.0157	0.493554
		11.8763	0.473844
		12.9418	0.498511
		14.7801	0.564268
		16.393	0.549069
		22.6268	0.613934
		IsoLine	IsoLine
[truncated: 180 more columns]

[truncated: 4 more sheets: PlotDat9, PlotDat10, all data, data table]
