# Supplementary material for: A tectonic carpet of Variscan flysch at the base of a rootless accretionary prism in northwestern Iberia: U–Pb zircon age constrains from sediments and volcanic olistoliths
Source: Copernicus journal article supplement (doi:10.5194/se-12-835-2021), 2021-04-15
Supplement: Supplementary file 5 [file se-12-835-2021-supplement.zip › SUPP TABLES/Supplementary Table 15_EC-PO-419.xls]

## Sheet: PlotDat0
Source sheet	all data	0.536312	0.0695188	0.498494	0.0656674	0.528352	0.0689787	0.558806	0.0723004	0.589866	0.0756324	0.47	0.0625622	0.47	0.0624506	0.47	0.0626738	0.46828	0.0623663	0.587445	0.0745555	0.599709	0.0762286	0.604901	0.0768107	0.601909	0.0770824	0.592788	0.0773417	0.572273	0.0740153
Plot name	Concordia0	0.549577	0.0707971	0.498453	0.0656924	0.528309	0.0690051	0.558759	0.072328	0.589816	0.0756613	0.47	0.0625622	0.47	0.0624506	0.47	0.0626738	0.497487	0.0656674	0.586909	0.074898	0.599185	0.076502	0.604353	0.0771455	0.601355	0.0774205	0.59212	0.07753	0.571877	0.0741831
Plot Type	1	0.552574	0.0715121	0.498334	0.0657154	0.528181	0.0690292	0.558623	0.0723534	0.589672	0.0756879	0.474933	0.0631231	0.474933	0.0630105	0.474933	0.0632357	0.527276	0.0689787	0.585388	0.0751358	0.597697	0.0766645	0.602797	0.0773706	0.599785	0.0776466	0.5902	0.0775592	0.570745	0.074264
1st free col	33	0.549119	0.0716681	0.498146	0.0657345	0.527981	0.0690493	0.558409	0.0723745	0.589443	0.07571	0.479883	0.0636843	0.479883	0.0635707	0.479883	0.063798	0.557657	0.0723004	0.582912	0.0752643	0.595271	0.0767128	0.600263	0.0774817	0.597228	0.0777563	0.587079	0.0774283	0.568908	0.0742556
Sigma Level	2	0.546191	0.0716931	0.497905	0.0657481	0.527723	0.0690637	0.558134	0.0723896	0.58915	0.0757258	0.48485	0.0642458	0.48485	0.0641311	0.48485	0.0643605	0.588642	0.0756324	0.579528	0.075281	0.591956	0.0766459	0.596801	0.0774766	0.593735	0.0777476	0.582842	0.077141	0.566417	0.0741581
Absolute Errs	FALSE	IsoLine	IsoLine	0.49763	0.0657552	0.527429	0.0690712	0.55782	0.0723974	0.588816	0.075734	0.489833	0.0648076	0.489833	0.0646919	0.489833	0.0649233	IsoLine	IsoLine	0.575304	0.0751855	0.587817	0.0764652	0.592478	0.0773554	0.589374	0.0776205	0.577606	0.0767051	0.563339	0.0739743
Symbol Type	1			0.497344	0.0657552	0.527122	0.0690712	0.557493	0.0723974	0.588468	0.075734	0.494833	0.0653697	0.494833	0.065253	0.494833	0.0654864			0.570321	0.0749797	0.582933	0.0761741	0.587379	0.0771205	0.584229	0.0773775	0.571514	0.0761325	0.559758	0.0737092
Inverse Plot	FALSE			0.497069	0.0657481	0.526828	0.0690637	0.557179	0.0723896	0.588133	0.0757258	0.49985	0.0659321	0.49985	0.0658143	0.49985	0.0660499			0.564676	0.0746676	0.5774	0.0757784	0.581602	0.0767764	0.5784	0.0770235	0.56473	0.0754388	0.555773	0.0733699
Color Plot	TRUE			0.496828	0.0657345	0.526571	0.0690493	0.556904	0.0723745	0.58784	0.07571	0.504884	0.0664948	0.504884	0.0663759	0.504884	0.0666136			0.558478	0.0742553	0.571325	0.0752857	0.57526	0.0763299	0.572002	0.0765652	0.557441	0.0746429	0.551491	0.0729657
3D plot	FALSE			0.496641	0.0657154	0.52637	0.0690292	0.55669	0.0723534	0.587612	0.0756879	0.509934	0.0670577	0.509934	0.0669379	0.509934	0.0671776			0.55185	0.0737508	0.564827	0.0747057	0.568476	0.0757896	0.565158	0.0760116	0.549845	0.0737666	0.547029	0.0725077
Linear	FALSE			0.496522	0.0656924	0.526243	0.0690051	0.556554	0.072328	0.587468	0.0756613	0.515002	0.067621	0.515002	0.0675001	0.515002	0.0677419			0.544918	0.0731639	0.558032	0.0740496	0.561383	0.075166	0.558002	0.0753734	0.542149	0.0728337	0.54251	0.0720084
Data Range	AC3:AG7			0.496481	0.0656674	0.526199	0.0689787	0.556508	0.0723004	0.587418	0.0756324	0.520086	0.0681846	0.520086	0.0680627	0.520086	0.0683065			0.53782	0.0725061	0.551073	0.0733302	0.554119	0.0744713	0.550674	0.0746631	0.534563	0.0718697	0.538056	0.0714813
Filled Symbols	FALSE			0.496522	0.0656424	0.526243	0.0689524	0.556554	0.0722728	0.587468	0.0756034	0.525188	0.0687485	0.525188	0.0686255	0.525188	0.0688714			0.530692	0.0717902	0.544085	0.0725615	0.546824	0.073719	0.543315	0.0738945	0.527295	0.0709008	0.533789	0.0709409
ConcAge	TRUE			0.496641	0.0656194	0.52637	0.0689283	0.55669	0.0722474	0.587612	0.0755769	0.530307	0.0693126	0.530307	0.0691886	0.530307	0.0694366			0.523673	0.07103	0.537203	0.0717585	0.539642	0.0729237	0.536069	0.0730826	0.520542	0.0699536	0.529825	0.0704019
ConcSwap	FALSE			0.496828	0.0656003	0.526571	0.0689082	0.556904	0.0722263	0.58784	0.0755548	0.535442	0.0698771	0.535442	0.069752	0.535442	0.0700021			0.5169	0.0702404	0.530562	0.0709367	0.532711	0.072101	0.529077	0.0722432	0.514489	0.0690538	0.526273	0.069879
1st Symbol-row	1			0.497069	0.0655866	0.526828	0.0688938	0.557179	0.0722112	0.588133	0.075539	0.540596	0.0704418	0.540596	0.0703158	0.540596	0.0705679			0.510506	0.0694368	0.524292	0.0701122	0.526167	0.0712668	0.522475	0.0713925	0.5093	0.068226	0.523229	0.0693864
				0.497344	0.0655795	0.527122	0.0688863	0.557493	0.0722034	0.588468	0.0755307	0.545766	0.0710069	0.545766	0.0708798	0.545766	0.071134			0.504613	0.0686348	0.518513	0.0693011	0.520136	0.0704374	0.516391	0.0705472	0.505118	0.0674928	0.520777	0.0689376
				0.49763	0.0655795	0.527429	0.0688863	0.55782	0.0722034	0.588816	0.0755307	0.550954	0.0715723	0.550954	0.0714441	0.550954	0.0717005			0.499338	0.06785	0.513339	0.068519	0.514737	0.0696289	0.510945	0.0697238	0.502056	0.0668742	0.518983	0.0685449
				0.497905	0.0655866	0.527723	0.0688938	0.558134	0.0722112	0.58915	0.075539	0.556159	0.0721379	0.556159	0.0720087	0.556159	0.0722672			0.494782	0.0670976	0.508871	0.0677813	0.510075	0.0688571	0.506242	0.0689382	0.500199	0.066387	0.517896	0.0682189
				0.498146	0.0656003	0.527981	0.0689082	0.558409	0.0722263	0.589443	0.0755548	0.561381	0.0727039	0.561381	0.0725736	0.561381	0.0728342			0.491034	0.0663924	0.505195	0.0671024	0.506239	0.0681369	0.502373	0.0682057	0.499595	0.0660445	0.517546	0.0679685
				0.498334	0.0656194	0.528181	0.0689283	0.558623	0.0722474	0.589672	0.0755769	0.566622	0.0732701	0.566622	0.0731388	0.566622	0.0734015			0.488168	0.0657481	0.502382	0.0664953	0.503306	0.0674824	0.499414	0.0675406	0.500263	0.0658562	0.517942	0.0678006
				0.498453	0.0656424	0.528309	0.0689524	0.558759	0.0722728	0.589816	0.0756034	0.571879	0.0738367	0.571879	0.0737043	0.571879	0.0739691			0.486239	0.0651771	0.500489	0.0659719	0.501331	0.0669064	0.497423	0.0669558	0.502183	0.065827	0.519074	0.0677198
				0.498494	0.0656674	0.528352	0.0689787	0.558806	0.0723004	0.589866	0.0756324	0.577155	0.0744035	0.577155	0.0742701	0.577155	0.074537			0.485284	0.0646907	0.49955	0.0655425	0.500354	0.06642	0.496437	0.0664628	0.505304	0.0659579	0.520911	0.0677282
				ConcTikEll	ConcTikEll	ConcTikEll	ConcTikEll	ConcTikEll	ConcTikEll	ConcTikEll	ConcTikEll	0.582448	0.0749707	0.582448	0.0748362	0.582448	0.0751052			0.485323	0.0642982	0.499586	0.0652154	0.500393	0.0660327	0.496478	0.0660711	0.509541	0.0662452	0.523402	0.0678257
												0.587759	0.0755382	0.587759	0.0754026	0.587759	0.0756737			0.486354	0.0640073	0.500594	0.0649968	0.501448	0.0657521	0.497542	0.0657883	0.514776	0.0666811	0.52648	0.0680095
												0.593087	0.0761059	0.593087	0.0759693	0.593087	0.0762425			0.488358	0.0638237	0.502556	0.0648912	0.503498	0.0655836	0.499611	0.06562	0.520869	0.0672537	0.53006	0.0682746
												0.598434	0.076674	0.598434	0.0765363	0.598434	0.0768116			0.491294	0.063751	0.505433	0.0649006	0.506503	0.0655304	0.502643	0.0655693	0.527653	0.0679474	0.534046	0.0686139
												0.603798	0.0772423	0.603798	0.0771036	0.603798	0.077381			0.495107	0.0637905	0.50917	0.0650247	0.510405	0.0655937	0.50658	0.0656374	0.534942	0.0687433	0.538328	0.069018
												0.609181	0.077811	0.609181	0.0776712	0.609181	0.0779507			0.499723	0.0639415	0.513692	0.0652611	0.515128	0.0657722	0.511345	0.0658229	0.542538	0.0696196	0.54279	0.069476
												0.614581	0.0783799	0.614581	0.0782391	0.614581	0.0785207			0.50505	0.0642011	0.518914	0.0656054	0.520579	0.0660624	0.516845	0.0661221	0.550234	0.0705525	0.547309	0.0699754
												0.62	0.0789492	0.62	0.0788073	0.62	0.079091			0.510986	0.0645642	0.524732	0.0660506	0.526653	0.0664587	0.522973	0.0665293	0.55782	0.0715165	0.551763	0.0705024
												0.62	0.0789492	0.62	0.0788073	0.62	0.079091			0.517414	0.0650237	0.531033	0.0665883	0.533232	0.0669534	0.529611	0.0670365	0.565088	0.0724854	0.55603	0.0710428
												IsoLine	IsoLine	ConcBand	ConcBand	ConcBand	ConcBand			0.524211	0.0655707	0.537696	0.0672078	0.540187	0.0675367	0.536627	0.0676338	0.571841	0.0734326	0.559993	0.0715819
																				0.531243	0.0661945	0.54459	0.0678973	0.547384	0.0681975	0.543887	0.0683097	0.577894	0.0743324	0.563545	0.0721048
																				0.538374	0.0668831	0.551581	0.0686431	0.554681	0.0689227	0.551249	0.069051	0.583083	0.0751602	0.566589	0.0725974
																				0.545464	0.067623	0.558533	0.0694309	0.561937	0.0696984	0.55857	0.0698431	0.587265	0.0758934	0.569042	0.0730462
																				0.552377	0.0683997	0.56531	0.0702453	0.569011	0.0705094	0.565706	0.0706708	0.590326	0.076512	0.570836	0.0734389
																				0.558976	0.0691983	0.571782	0.0710705	0.575765	0.0713399	0.57252	0.0715179	0.592184	0.0769992	0.571923	0.0737649
																				0.565135	0.070003	0.577821	0.0718903	0.582068	0.0721737	0.578878	0.072368	0.592788	0.0773417	0.572273	0.0740153
																				0.570733	0.0707984	0.583311	0.0726888	0.587796	0.0729946	0.584657	0.0732044			Cyan	Cyan
																				0.57566	0.0715688	0.588143	0.0734505	0.59284	0.0737867	0.589744	0.0740109
																				0.579822	0.0722994	0.592226	0.0741606	0.597099	0.0745346	0.59404	0.0747718
																				0.583137	0.0729758	0.595478	0.0748052	0.600492	0.0752236	0.597462	0.0754723
																				0.585541	0.073585	0.597837	0.0753718	0.602952	0.0758403	0.599944	0.0760987
																				0.586986	0.074115	0.599256	0.0758493	0.604431	0.0763728	0.601436	0.0766389
																				0.587445	0.0745555	0.599709	0.0762286	0.604901	0.0768107	0.601909	0.0770824

## Sheet: PlotDat1
Source sheet	all data	0.536312	0.0695188	0.363093	0.05	0.343738	0.0476374	0.587445	0.0745555	0.599709	0.0762286	0.604901	0.0768107	0.601909	0.0770824	0.592788	0.0773417	0.608233	0.0775368	0.610041	0.0786665	0.621739	0.0798661	0.641054	0.0798287	0.627871	0.0799271	0.619737	0.0802897	0.63375	0.0803047	0.653049	0.0808863	0.636263	0.0809564	0.642096	0.0808416	0.656283	0.0809326	0.639258	0.0811751	0.65465	0.0811232	0.662296	0.0808304	0.661915	0.0813146	0.638125	0.0816594
Plot name	Concordia0	0.549577	0.0707971	0.363093	0.05	0.411563	0.0557947	0.58627	0.0750303	0.59856	0.0765974	0.603699	0.0772721	0.600696	0.0775478	0.590845	0.0775672	0.607037	0.0780115	0.608857	0.0790891	0.620535	0.0802548	0.639808	0.0802687	0.626633	0.0803799	0.618562	0.0806278	0.632504	0.0807959	0.651728	0.0813749	0.635075	0.0813201	0.64087	0.0812735	0.655001	0.0814173	0.638024	0.081628	0.653368	0.0816124	0.66088	0.0814847	0.660568	0.0818448	0.636918	0.0820233
Plot Type	1	0.552574	0.0715121	0.385781	0.0527336	0.482812	0.0640155	0.582912	0.0752643	0.595271	0.0767128	0.600263	0.0774817	0.597228	0.0777563	0.585285	0.0773168	0.60362	0.0782379	0.605473	0.0792531	0.61709	0.080375	0.636237	0.0804463	0.623093	0.0805682	0.615195	0.0806955	0.628941	0.0810295	0.647944	0.0815911	0.63167	0.0814185	0.637361	0.0814441	0.651332	0.0816419	0.634494	0.0818186	0.649697	0.0818406	0.656824	0.0818866	0.656712	0.0821073	0.63346	0.0821153
1st free col	101	0.549119	0.0716681	0.408845	0.0554743	0.557657	0.0723004	0.577517	0.0752472	0.589985	0.0765696	0.594742	0.0774305	0.591658	0.0776987	0.576558	0.0766108	0.598132	0.0782062	0.600036	0.0791514	0.611553	0.0802214	0.630498	0.080354	0.617404	0.0804839	0.609784	0.0804897	0.623217	0.0809952	0.641862	0.0815257	0.626197	0.0812475	0.631723	0.081346	0.645434	0.0815965	0.628823	0.0817384	0.643797	0.0817977	0.650303	0.0820185	0.650515	0.0820905	0.627902	0.0819315
Sigma Level	2	0.546191	0.0716931	0.432294	0.0582221	0.636279	0.0806498	0.570321	0.0749797	0.582933	0.0761741	0.587379	0.0771205	0.584229	0.0773775	0.56537	0.0755064	0.590811	0.0779177	0.592785	0.0787884	0.604168	0.0798007	0.622842	0.0799955	0.609817	0.0801306	0.602564	0.0800194	0.615582	0.0806947	0.633748	0.0811814	0.618895	0.0808144	0.624201	0.0809834	0.637566	0.0812832	0.621258	0.0813909	0.635926	0.0814857	0.641602	0.0818748	0.642248	0.0817952	0.620486	0.0814797
Absolute Errs	FALSE	0.556215	0.0723312	0.456133	0.0609771	0.718871	0.0890642	0.561639	0.0744735	0.574423	0.0755436	0.578494	0.0765655	0.575265	0.0768068	0.552629	0.0740931	0.581979	0.077385	0.584036	0.07818	0.595255	0.0791313	0.613603	0.0793868	0.600662	0.0795237	0.593851	0.0793053	0.60637	0.080141	0.623958	0.0805732	0.610083	0.0801382	0.615124	0.0803723	0.628072	0.0807157	0.61213	0.0807914	0.626429	0.0809182	0.631103	0.0814617	0.632272	0.0812343	0.611537	0.0807799
Symbol Type	1	0.558512	0.0731729	0.480369	0.0637393	0.805631	0.097544	0.55185	0.0737508	0.564827	0.0747057	0.568476	0.0757896	0.565158	0.0760116	0.539367	0.0724853	0.57202	0.0766315	0.574171	0.0773527	0.585206	0.0782425	0.603185	0.0785542	0.59034	0.0786898	0.584026	0.0783785	0.595983	0.0793582	0.612918	0.0797279	0.600146	0.0792484	0.60489	0.0795392	0.617367	0.0799187	0.601837	0.079966	0.61572	0.08012	0.619263	0.0807972	0.621023	0.0804323	0.601446	0.0798625
Inverse Plot	FALSE	0.569241	0.0741105	0.505008	0.0665086	0.89677	0.10609	0.541381	0.0728431	0.554565	0.073697	0.557764	0.0748267	0.554351	0.0750264	0.526657	0.0708134	0.561371	0.0756901	0.563622	0.0763428	0.574459	0.0771732	0.592044	0.0775343	0.579302	0.0776654	0.573518	0.0772795	0.584875	0.0783807	0.601112	0.0786822	0.58952	0.0781839	0.593945	0.0785207	0.605917	0.0789271	0.590831	0.0789509	0.604268	0.0791259	0.606601	0.0799104	0.608992	0.0794242	0.590654	0.0787676
Color Plot	TRUE	0.58663	0.074267	0.530057	0.0692852	0.99251	0.114702	0.530692	0.0717902	0.544085	0.0725615	0.546824	0.073719	0.543315	0.0738945	0.51553	0.0692128	0.550496	0.0746018	0.552849	0.0751943	0.563484	0.0759699	0.580666	0.0763716	0.56803	0.0764951	0.562787	0.0760564	0.573533	0.0772512	0.589054	0.077482	0.578667	0.0769913	0.582768	0.0773613	0.594225	0.0777842	0.579591	0.0777903	0.592572	0.0779795	0.593669	0.0788401	0.596706	0.0782542	0.579633	0.0775432
3D plot	FALSE	0.573951	0.0743294	0.555523	0.0720689	1.09308	0.123382	0.520248	0.0706379	0.533844	0.0713489	0.536136	0.0725148	0.532532	0.0726653	0.506887	0.067813	0.539871	0.0734143	0.542325	0.0739575	0.552761	0.0746854	0.569549	0.075117	0.557016	0.0752303	0.552302	0.0747625	0.562451	0.076019	0.577274	0.0761796	0.568062	0.0757227	0.571846	0.0761115	0.582801	0.07654	0.56861	0.076535	0.581144	0.0767308	0.581033	0.0776329	0.584702	0.0769733	0.568864	0.0762426
Linear	FALSE	0.568407	0.0744389	0.581413	0.07486	1.19873	0.132129	0.510506	0.0694368	0.524292	0.0701122	0.526167	0.0712668	0.522475	0.0713925	0.501428	0.0667276	0.529961	0.0721794	0.532507	0.0726863	0.542758	0.0733758	0.559178	0.0738251	0.546743	0.073926	0.542521	0.0734545	0.552114	0.0747379	0.566284	0.0748321	0.558169	0.0744335	0.561659	0.0748261	0.572143	0.0752488	0.558366	0.0752399	0.570484	0.0754344	0.569245	0.0763418	0.573503	0.0756376	0.558817	0.0749229
Data Range	AC3:AG48	0.579494	0.0749017	0.607734	0.0776583	IsoLine	IsoLine	0.501891	0.0682393	0.515844	0.0689054	0.517351	0.0700295	0.513582	0.0701318	0.499595	0.0660445	0.521198	0.0709512	0.523826	0.0714365	0.533912	0.0720982	0.550008	0.0725526	0.537659	0.0726394	0.533871	0.0721896	0.542973	0.073464	0.556566	0.0734982	0.549421	0.0731801	0.55265	0.0735611	0.562719	0.0739671	0.549308	0.0739615	0.561057	0.074147	0.558821	0.0750231	0.563601	0.0743054	0.549933	0.0736415
Filled Symbols	FALSE	0.595375	0.0751451	0.634493	0.0804639			0.494782	0.0670976	0.508871	0.0677813	0.510075	0.0688571	0.506242	0.0689382	0.501538	0.065819	0.513966	0.0697833	0.516661	0.0702625	0.52661	0.0709086	0.542437	0.071355	0.530161	0.0714266	0.52673	0.0710229	0.535429	0.072253	0.548543	0.0722363	0.542199	0.0720172	0.545214	0.072372	0.554939	0.0727509	0.541832	0.0727558	0.553276	0.0729248	0.550215	0.0737344	0.555426	0.0730349	0.542599	0.0724546
ConcAge	FALSE	0.58435	0.0752518	0.661698	0.0832768			0.489487	0.0660618	0.503677	0.0667891	0.504656	0.0678006	0.500776	0.0678639	0.507098	0.0660694	0.50858	0.0687268	0.511325	0.0692157	0.521172	0.069859	0.536798	0.0702847	0.524576	0.0703407	0.521411	0.0700056	0.529811	0.0711577	0.542568	0.0711015	0.536819	0.0709956	0.539675	0.0713106	0.549145	0.0716534	0.536263	0.0716754	0.54748	0.0718212	0.543805	0.072532	0.549337	0.0718817	0.537136	0.0714141
ConcSwap	FALSE	0.588631	0.0752954	0.689355	0.086097			0.486239	0.0651771	0.500489	0.0659719	0.501331	0.0669064	0.497423	0.0669558	0.515825	0.0667754	0.505275	0.0678277	0.508052	0.0683419	0.517835	0.0689951	0.533337	0.0693884	0.52115	0.0694291	0.518145	0.0691819	0.526364	0.070226	0.538901	0.0701434	0.533517	0.0701601	0.536276	0.0704234	0.545588	0.0707225	0.532847	0.0707676	0.543923	0.0708845	0.539869	0.0714686	0.5456	0.0708961	0.533783	0.0705653
1st Symbol-row	1	0.600354	0.0754657	0.717472	0.0889245			0.485179	0.0644821	0.499446	0.0653657	0.500246	0.0662134	0.496329	0.0662538	0.527012	0.0678798	0.504198	0.0671255	0.506984	0.0676792	0.516744	0.0683549	0.532205	0.0687054	0.520032	0.0687317	0.517077	0.0685881	0.525239	0.0694987	0.537702	0.069404	0.532436	0.0695471	0.535165	0.0697491	0.544425	0.0699989	0.531731	0.070072	0.54276	0.0701556	0.538581	0.0705906	0.544378	0.0701213	0.532685	0.0699453
		0.585495	0.0756235	0.746058	0.0917594			0.486354	0.0640073	0.500594	0.0649968	0.501448	0.0657521	0.497542	0.0657883	0.539754	0.0692931	0.505393	0.0666508	0.508168	0.0672566	0.517947	0.0679661	0.533452	0.0682654	0.52127	0.0682789	0.518252	0.0682499	0.526485	0.0690075	0.539023	0.0689154	0.533624	0.0691834	0.536391	0.0693173	0.545706	0.0695142	0.532966	0.069619	0.544043	0.0696664	0.539996	0.0699363	0.545725	0.0695911	0.533892	0.0695814
		0.598705	0.0756394	0.775119	0.0946017			0.489712	0.0637733	0.503883	0.0648815	0.504885	0.0655424	0.50101	0.0655798	0.553016	0.0709009	0.50881	0.0664244	0.511552	0.0670926	0.521393	0.0678459	0.537023	0.0680877	0.52481	0.0680906	0.521619	0.0681823	0.530048	0.0687739	0.542807	0.0686992	0.537029	0.069085	0.5399	0.0691466	0.549376	0.0692896	0.536495	0.0694285	0.547714	0.0694383	0.544053	0.0695344	0.549581	0.0693286	0.53735	0.0694894
		0.600438	0.0757105	0.804664	0.0974514			0.495107	0.0637905	0.50917	0.0650247	0.510405	0.0655937	0.50658	0.0656374	0.565726	0.0725728	0.514299	0.0664561	0.516988	0.0671943	0.526929	0.0679995	0.542762	0.0681801	0.530498	0.0681749	0.52703	0.0683881	0.535772	0.0688081	0.548889	0.0687646	0.542503	0.0692561	0.545538	0.0692448	0.555273	0.069335	0.542167	0.0695087	0.553614	0.0694811	0.550574	0.0694025	0.555778	0.0693454	0.542908	0.0696732
		0.603146	0.075718	0.8347	0.100309			0.502303	0.064058	0.516222	0.0654201	0.517769	0.0659037	0.51401	0.0659586	0.576853	0.0741734	0.521619	0.0667446	0.52424	0.0675573	0.534315	0.0684202	0.550418	0.0685385	0.538085	0.0685283	0.53425	0.0688583	0.543407	0.0691087	0.557002	0.0691089	0.549805	0.0696892	0.55306	0.0696073	0.563141	0.0696483	0.549732	0.0698561	0.561484	0.0697931	0.559274	0.0695462	0.564045	0.0696407	0.550324	0.070125
		0.585405	0.0758023	0.865237	0.103173			0.510986	0.0645642	0.524732	0.0660506	0.526653	0.0664587	0.522973	0.0665293	0.585496	0.0755732	0.530452	0.0672773	0.532989	0.0681657	0.543228	0.0690896	0.559657	0.0691473	0.54724	0.0691351	0.542963	0.0695724	0.552619	0.0696624	0.566793	0.0697171	0.558617	0.0703654	0.562137	0.0702185	0.572635	0.0702158	0.55886	0.0704557	0.570981	0.0703606	0.569774	0.0699593	0.574021	0.0702016	0.559273	0.0708248
		0.598758	0.0758997	0.896282	0.106045			0.520775	0.0652869	0.534328	0.0668885	0.536671	0.0672346	0.53308	0.0673246	0.590955	0.0766585	0.54041	0.0680308	0.542854	0.068993	0.553277	0.0699784	0.570074	0.0699798	0.557562	0.069969	0.552788	0.0704992	0.563006	0.0704452	0.577833	0.0705624	0.568553	0.0712552	0.572371	0.0710515	0.583341	0.0710128	0.569152	0.071281	0.58169	0.0711589	0.581613	0.0706238	0.58527	0.0710036	0.569364	0.0717422
		0.594293	0.0761822	0.927843	0.108925			0.531243	0.0661945	0.54459	0.0678973	0.547384	0.0681975	0.543887	0.0683097	0.592788	0.0773417	0.55106	0.0689723	0.553403	0.0700029	0.564024	0.0710478	0.581215	0.0709997	0.568601	0.0709934	0.563296	0.0715982	0.574113	0.0714226	0.589639	0.0716081	0.57918	0.0723196	0.583316	0.07207	0.59479	0.0720044	0.580159	0.0722962	0.593143	0.0721529	0.594276	0.0715106	0.597301	0.0720117	0.580156	0.0728371
		0.592462	0.0764312	0.95993	0.111812			0.541933	0.0672475	0.55507	0.0690327	0.558323	0.0693052	0.554924	0.0694416			0.561934	0.0700605	0.564175	0.0711514	0.574999	0.072251	0.592593	0.0721624	0.579873	0.0721637	0.574026	0.0728214	0.585456	0.0725522	0.601696	0.0728083	0.590033	0.0735122	0.594494	0.0732295	0.606482	0.0731473	0.591398	0.0734568	0.604839	0.0732993	0.607207	0.0725809	0.609587	0.0731817	0.591177	0.0740615
		0.599599	0.0765505	0.992551	0.114706			0.552377	0.0683997	0.56531	0.0702453	0.569011	0.0705094	0.565706	0.0706708			0.572559	0.071248	0.5747	0.0723883	0.585722	0.0735355	0.60371	0.0734171	0.590887	0.0734286	0.584512	0.0741152	0.596538	0.0737844	0.613477	0.0741107	0.600637	0.0747808	0.605415	0.0744793	0.617907	0.0743915	0.60238	0.0747121	0.616266	0.0745481	0.619843	0.0737881	0.621591	0.0744626	0.601946	0.075362
		0.606584	0.0767999	1.02572	0.117608			0.562119	0.0696009	0.574863	0.071482	0.578981	0.0717574	0.575764	0.0719436			0.582469	0.0724829	0.584518	0.0736594	0.595725	0.0748452	0.614081	0.0747089	0.60116	0.0747328	0.594293	0.0754232	0.606875	0.0750655	0.624467	0.0754582	0.61053	0.07607	0.615602	0.0757647	0.628564	0.0756827	0.612624	0.0760072	0.626926	0.0758444	0.631631	0.0750792	0.632789	0.0757983	0.611993	0.0766818
		0.594327	0.0769649	1.05943	0.120518			0.570733	0.0707984	0.583311	0.0726888	0.587796	0.0729946	0.584657	0.0732044			0.591232	0.0737111	0.593199	0.0749092	0.604571	0.0761227	0.623252	0.0759814	0.610244	0.0760195	0.602943	0.0766882	0.616015	0.0763394	0.634185	0.0767921	0.619279	0.0773235	0.624611	0.0770296	0.637989	0.0769644	0.621682	0.0772855	0.636353	0.0771319	0.642056	0.0763979	0.642692	0.0771305	0.620877	0.0779632
		0.60307	0.0770324	1.09371	0.123435			0.577842	0.07194	0.590284	0.0738129	0.595073	0.0741671	0.591996	0.074398			0.598465	0.074879	0.600363	0.0760832	0.611872	0.0773123	0.630822	0.077179	0.617742	0.0772322	0.610084	0.0778548	0.62356	0.0775504	0.642207	0.078054	0.6265	0.0784864	0.632047	0.0782188	0.645768	0.0781806	0.629158	0.0784912	0.644134	0.0783541	0.650661	0.0776866	0.650867	0.078401	0.628211	0.0791501
		0.604147	0.0775163	1.12856	0.12636			0.583137	0.0729758	0.595478	0.0748052	0.600492	0.0752236	0.597462	0.0754723			0.603851	0.0759356	0.605699	0.07713	0.617311	0.0783619	0.636461	0.0782493	0.623326	0.0783181	0.615403	0.0788722	0.629178	0.0786457	0.648183	0.0791888	0.63188	0.0795079	0.637586	0.0792801	0.651563	0.0792781	0.634726	0.0795716	0.64993	0.0794577	0.657072	0.078889	0.656955	0.0795542	0.633674	0.0801906
		0.607875	0.0777	1.16398	0.129292			0.586385	0.0738605	0.598666	0.0756223	0.603816	0.0761178	0.600816	0.0763803			0.607155	0.0768346	0.608973	0.0780038	0.620648	0.0792258	0.639922	0.0791456	0.626752	0.0792297	0.618668	0.0796958	0.632625	0.0795774	0.65185	0.0801469	0.635183	0.0803434	0.640985	0.0801673	0.65512	0.080209	0.638143	0.0804795	0.653487	0.0803944	0.661007	0.0799524	0.660693	0.0805398	0.637027	0.0810394
		0.604797	0.0783577	1.2	0.132232			0.587445	0.0745555	0.599709	0.0762286	0.604901	0.0768107	0.601909	0.0770824			0.608233	0.0775368	0.610041	0.0786665	0.621739	0.0798661	0.641054	0.0798287	0.627871	0.0799271	0.619737	0.0802897	0.63375	0.0803047	0.653049	0.0808863	0.636263	0.0809564	0.642096	0.0808416	0.656283	0.0809326	0.639258	0.0811751	0.65465	0.0811232	0.662296	0.0808304	0.661915	0.0813146	0.638125	0.0816594
		0.619306	0.0786582	1.2	0.132232
		0.635152	0.0789501	IsoLine	IsoLine
		0.615497	0.078964
		0.638996	0.0801981
		0.626566	0.0802203
		0.648405	0.0808246
		0.642834	0.0810933
		0.637957	0.082087
		0.662736	0.0823787
		0.656731	0.0836445
		0.80226	0.0967192
		0.81641	0.0999575
		0.869352	0.104195
		0.943661	0.107188
		0.988124	0.113802
		IsoLine	IsoLine
[truncated: 50 more columns]

## Sheet: PlotDat2
Source sheet	all data	0.536312	0.0695188	0.45	0.0602713	0.482812	0.0640155	0.587445	0.0745555	0.599709	0.0762286	0.604901	0.0768107	0.601909	0.0770824	0.592788	0.0773417	0.608233	0.0775368	0.610041	0.0786665	0.621739	0.0798661	0.641054	0.0798287	0.627871	0.0799271	0.619737	0.0802897	0.63375	0.0803047	0.653049	0.0808863	0.636263	0.0809564	0.642096	0.0808416	0.656283	0.0809326	0.639258	0.0811751	0.65465	0.0811232	0.662296	0.0808304	0.661915	0.0813146	0.638125	0.0816594
Plot name	Concordia0	0.549577	0.0707971	0.452903	0.0606061	0.512308	0.0673218	0.586702	0.0749499	0.598983	0.0765404	0.604141	0.0771954	0.601142	0.0774707	0.591729	0.0775535	0.607477	0.0779316	0.609292	0.0790212	0.620978	0.0801949	0.640267	0.0801973	0.627088	0.080306	0.618995	0.0805788	0.632962	0.0807134	0.652214	0.0812941	0.635513	0.0812652	0.641321	0.0812038	0.655473	0.0813363	0.638478	0.081554	0.65384	0.0815306	0.661402	0.0813671	0.661064	0.0817549	0.637362	0.0819689
Plot Type	1	0.552574	0.0715121	0.462805	0.0617414	0.542391	0.0706383	0.584585	0.0751961	0.59691	0.0766957	0.601975	0.077425	0.598955	0.0777007	0.58868	0.0775092	0.605322	0.0781737	0.607159	0.0792163	0.618806	0.0803577	0.638016	0.0804043	0.624856	0.0805219	0.616873	0.0807004	0.630716	0.0809635	0.649829	0.0815341	0.633367	0.08141	0.63911	0.0814049	0.65316	0.0815799	0.636253	0.0817711	0.651526	0.0817773	0.658845	0.0817495	0.658633	0.0820304	0.635183	0.0821102
1st free col	101	0.549119	0.0716681	0.472774	0.0628778	0.573073	0.0739651	0.58115	0.0752874	0.593546	0.07669	0.598461	0.0774933	0.59541	0.0777662	0.583774	0.0772107	0.601828	0.0782564	0.603698	0.0792466	0.615283	0.0803501	0.634363	0.0804438	0.621236	0.0805689	0.613429	0.0806512	0.627072	0.0810482	0.645958	0.0815999	0.629884	0.0813867	0.635521	0.0814393	0.649407	0.0816567	0.632643	0.0818206	0.647771	0.0818565	0.654695	0.0819671	0.654689	0.0821338	0.631646	0.0820795
Sigma Level	2	0.546191	0.0716931	0.482812	0.0640155	0.604365	0.0773023	0.576493	0.0752214	0.588982	0.0765236	0.593695	0.0773985	0.590601	0.0776653	0.577225	0.0766711	0.59709	0.0781775	0.599005	0.0791112	0.610503	0.0801724	0.629409	0.0803148	0.616325	0.0804457	0.608757	0.0804326	0.622131	0.0809653	0.640708	0.0814896	0.625158	0.0811962	0.630653	0.0813061	0.644315	0.0815647	0.627747	0.081701	0.642677	0.0817662	0.649065	0.0820141	0.649339	0.0820622	0.626847	0.0818776
Absolute Errs	FALSE	0.556215	0.0723312	0.492917	0.0651545	0.636279	0.0806498	0.57074	0.0749998	0.583343	0.076201	0.587807	0.0771431	0.584661	0.0774008	0.56932	0.0759139	0.591237	0.0779391	0.593207	0.0788138	0.604597	0.0798293	0.623287	0.0800208	0.610259	0.0801557	0.602984	0.0800505	0.616026	0.080717	0.634221	0.0812062	0.61932	0.0808434	0.624639	0.0810089	0.638024	0.0813062	0.621698	0.0814157	0.636384	0.0815087	0.642109	0.0818892	0.642729	0.0818175	0.620918	0.0815099
Symbol Type	1	0.558512	0.0731729	0.503092	0.0662946	0.668829	0.0840077	0.564047	0.0746288	0.576784	0.075731	0.580959	0.0767341	0.577751	0.07698	0.560405	0.0749722	0.584429	0.0775478	0.586463	0.0783626	0.597728	0.0793301	0.616166	0.0795699	0.603202	0.0797067	0.596268	0.0795153	0.608925	0.08031	0.626674	0.0807575	0.612528	0.0803382	0.617642	0.0805559	0.630706	0.0808885	0.614662	0.0809723	0.629064	0.0810911	0.634016	0.0815957	0.635039	0.0814064	0.61402	0.0809866
Inverse Plot	FALSE	0.569241	0.0741105	0.513336	0.067436	0.702025	0.087376	0.556598	0.0741183	0.569482	0.0751264	0.573336	0.0761827	0.570061	0.0764143	0.550868	0.0738872	0.576851	0.0770141	0.578956	0.0777698	0.590081	0.0786887	0.608239	0.0789744	0.595348	0.079111	0.588792	0.0788417	0.601021	0.0797556	0.618273	0.0801558	0.604967	0.0796942	0.609855	0.0799594	0.62256	0.0803228	0.60683	0.0803831	0.620915	0.0805249	0.625007	0.0811417	0.62648	0.0808402	0.606342	0.0803218
Color Plot	TRUE	0.58663	0.074267	0.523649	0.0685786	0.735883	0.0907549	0.548596	0.0734824	0.561638	0.0744037	0.565147	0.0755038	0.561799	0.0757191	0.541126	0.0727064	0.56871	0.0763527	0.570892	0.0770516	0.581866	0.0779223	0.599723	0.0782504	0.586909	0.0783849	0.58076	0.0780479	0.59253	0.0790687	0.609248	0.0794173	0.596844	0.078929	0.601488	0.0792357	0.613808	0.0796247	0.598417	0.079664	0.612161	0.0798253	0.615328	0.0805395	0.617283	0.0801343	0.598092	0.0795338
3D plot	FALSE	0.573951	0.0743294	0.534033	0.0697224	0.770413	0.0941442	0.540258	0.0727384	0.553464	0.0735826	0.556615	0.0747161	0.553191	0.0749134	0.531607	0.0714812	0.560228	0.0755816	0.56249	0.0762276	0.573306	0.0770519	0.590849	0.0774178	0.578118	0.0775482	0.572391	0.0771557	0.583684	0.0782682	0.599845	0.0785623	0.58838	0.0780636	0.592771	0.0784045	0.604689	0.0788131	0.58965	0.0788347	0.603039	0.0790116	0.605242	0.0798056	0.607702	0.0793079	0.589497	0.078644
Linear	FALSE	0.568407	0.0744389	0.544488	0.0708674	0.805631	0.097544	0.531813	0.0719065	0.545184	0.0726856	0.547972	0.073841	0.544473	0.0740192	0.522724	0.0702653	0.551637	0.0747219	0.55398	0.0753203	0.564636	0.0761013	0.58186	0.0764993	0.569212	0.0766237	0.563914	0.0761894	0.574723	0.0773758	0.59032	0.0776141	0.579806	0.0771214	0.58394	0.0774885	0.595452	0.0779102	0.580771	0.0779178	0.593799	0.0781059	0.595026	0.07896	0.597996	0.0783835	0.580789	0.0776766
Data Range	AC3:AG48	0.579494	0.0749017	0.555014	0.0720136	IsoLine	IsoLine	0.523491	0.0710095	0.537025	0.071737	0.539456	0.0729024	0.535881	0.0730608	0.514867	0.0691118	0.543171	0.0737969	0.545593	0.0743543	0.556091	0.0750965	0.573002	0.0755198	0.560436	0.0756366	0.555559	0.0751753	0.565892	0.076416	0.580932	0.0765985	0.571356	0.0761282	0.575238	0.0765126	0.586349	0.0769406	0.57202	0.0769384	0.584693	0.0771329	0.584957	0.0780258	0.58843	0.0773865	0.572208	0.0766582
Filled Symbols	FALSE	0.595375	0.0751451	0.565612	0.0731611			0.515518	0.0700719	0.529207	0.0707628	0.531297	0.0719258	0.52765	0.0720645	0.508379	0.0680711	0.535061	0.072832	0.537559	0.0733562	0.547905	0.0740647	0.564515	0.0745062	0.552029	0.0746139	0.547554	0.0741412	0.557433	0.0754148	0.571939	0.0755434	0.56326	0.0751111	0.566901	0.0755036	0.577627	0.0759308	0.563637	0.075923	0.57597	0.0761192	0.575311	0.0770284	0.579266	0.0763439	0.563987	0.0756164
ConcAge	FALSE	0.58435	0.0752518	0.576282	0.0743098			0.508113	0.0691192	0.521945	0.0697895	0.523718	0.0709379	0.520005	0.0710573	0.503544	0.0671888	0.527527	0.0718534	0.530096	0.0723531	0.540301	0.0730341	0.556631	0.0734861	0.54422	0.0735834	0.540118	0.0731152	0.549575	0.0743997	0.563585	0.0744773	0.55574	0.0740979	0.559157	0.0744889	0.569526	0.0749083	0.55585	0.0748995	0.567866	0.0750924	0.56635	0.0759951	0.570753	0.0752843	0.55635	0.0745796
ConcSwap	FALSE	0.588631	0.0752954	0.587024	0.0754598			0.501477	0.0681773	0.515437	0.0688438	0.516926	0.0699657	0.513153	0.0700668	0.500573	0.0665032	0.520776	0.0708878	0.523408	0.0713723	0.533486	0.0720329	0.549566	0.0724872	0.537221	0.0725732	0.533454	0.0721252	0.542533	0.0733982	0.556098	0.0734295	0.549	0.0731161	0.552216	0.0734962	0.562265	0.073901	0.548872	0.0738958	0.560604	0.0740805	0.558319	0.074954	0.563124	0.0742365	0.549505	0.0735762
1st Symbol-row	1	0.600354	0.0754657	0.59784	0.076611			0.495791	0.0672721	0.509861	0.0679513	0.511107	0.0690357	0.507283	0.06912	0.499595	0.0660445	0.514992	0.0699616	0.517678	0.0704407	0.527647	0.0710884	0.543512	0.0715369	0.531225	0.0716109	0.527743	0.0711984	0.5365	0.0724378	0.549682	0.0724284	0.543224	0.0721926	0.546269	0.0725525	0.556044	0.0729364	0.542893	0.0729392	0.554381	0.0731112	0.551437	0.0739335	0.556586	0.0732291	0.54364	0.0726336
		0.585495	0.0756235	0.60873	0.0777634			0.49121	0.0664281	0.505367	0.0671364	0.506419	0.0681733	0.502554	0.0682427	0.500654	0.0658327	0.510332	0.0691	0.513062	0.0695835	0.522942	0.0702264	0.538633	0.0706611	0.526394	0.0707228	0.523142	0.07036	0.531639	0.0715446	0.544513	0.0715015	0.53857	0.0713525	0.541478	0.0716837	0.551031	0.0720408	0.538076	0.0720558	0.549367	0.0722108	0.545891	0.0729615	0.551319	0.0722896	0.538914	0.0717774
		0.598705	0.0756394	0.619693	0.078917			0.48786	0.0656685	0.50208	0.0664214	0.50299	0.0674019	0.499096	0.0674588	0.503703	0.065877	0.506924	0.0683266	0.509685	0.0688243	0.5195	0.0694702	0.535065	0.0698837	0.52286	0.0699331	0.519775	0.0696329	0.528084	0.0707429	0.540731	0.0706739	0.535165	0.0706188	0.537972	0.0709134	0.547363	0.0712386	0.534552	0.0712697	0.545698	0.0714039	0.541833	0.0720645	0.547465	0.0714436	0.535456	0.0710309
		0.600438	0.0757105	0.630732	0.0800719			0.485831	0.0650139	0.500088	0.0658257	0.500914	0.0667426	0.497002	0.0667897	0.508609	0.0661755	0.50486	0.0676624	0.507641	0.0681837	0.517415	0.0688407	0.532902	0.0692258	0.52072	0.0692633	0.517735	0.0690368	0.525931	0.0700547	0.53844	0.0699683	0.533102	0.0700115	0.535849	0.0702626	0.545141	0.0705517	0.532418	0.0706024	0.543476	0.0707126	0.539374	0.071267	0.545131	0.0707142	0.533361	0.0704147
		0.603146	0.075718	0.641846	0.081228			0.485179	0.0644821	0.499446	0.0653657	0.500246	0.0662134	0.496329	0.0662538	0.515158	0.0667151	0.504198	0.0671255	0.506984	0.0676792	0.516744	0.0683549	0.532205	0.0687054	0.520032	0.0687317	0.517077	0.0685881	0.525239	0.0694987	0.537702	0.069404	0.532436	0.0695471	0.535165	0.0697491	0.544425	0.0699989	0.531731	0.070072	0.54276	0.0701556	0.538581	0.0705906	0.544378	0.0701213	0.532685	0.0699453
		0.585405	0.0758023	0.653035	0.0823853			0.485922	0.0640878	0.500172	0.0650538	0.501006	0.0658288	0.497096	0.0658655	0.523063	0.0674723	0.504954	0.0667307	0.507732	0.0673245	0.517504	0.0680261	0.532993	0.0683367	0.520814	0.0683528	0.517819	0.068299	0.526027	0.06909	0.538536	0.0689962	0.533187	0.0692383	0.53594	0.0693869	0.545234	0.0695951	0.532512	0.0696931	0.543571	0.0697483	0.539475	0.0700539	0.545229	0.0696811	0.533447	0.0696358
		0.598758	0.0758997	0.664301	0.0835439			0.48804	0.0638416	0.502245	0.0648986	0.503173	0.0655992	0.499283	0.0656354	0.531978	0.068414	0.507108	0.0664886	0.509866	0.0671294	0.519676	0.0678632	0.535244	0.0681298	0.523046	0.0681369	0.519941	0.0681773	0.528273	0.0688399	0.540922	0.0687562	0.535333	0.0690936	0.538152	0.0691859	0.547547	0.0693516	0.534737	0.0694759	0.545885	0.0695016	0.542031	0.0696715	0.547659	0.0694055	0.535627	0.0694945
		0.594293	0.0761822	0.675643	0.0847037			0.491474	0.0637503	0.505609	0.0649043	0.506687	0.0655309	0.502829	0.06557	0.541515	0.069499	0.510602	0.0664059	0.513327	0.0670991	0.5232	0.0678708	0.538896	0.0680903	0.526667	0.0680899	0.523385	0.0682265	0.531917	0.0687552	0.544793	0.0686904	0.538816	0.0691168	0.541741	0.0691515	0.551301	0.0692748	0.538347	0.0694265	0.54964	0.0694224	0.546181	0.0694538	0.551604	0.0693021	0.539164	0.0695252
		0.592462	0.0764312	0.687063	0.0858648			0.496131	0.0638163	0.510173	0.0650707	0.511453	0.0656257	0.507637	0.0656708	0.551257	0.0706798	0.51534	0.0664848	0.51802	0.0672345	0.52798	0.0680485	0.543851	0.0682193	0.531577	0.0682131	0.528057	0.0684451	0.536858	0.0688381	0.550043	0.0688007	0.543541	0.0693074	0.546608	0.0692847	0.556392	0.0693668	0.543243	0.069546	0.554733	0.0695127	0.551811	0.0694068	0.556954	0.0693737	0.543963	0.0697271
		0.599599	0.0765505	0.698561	0.0870271			0.501885	0.0640378	0.515811	0.0653933	0.51734	0.0658811	0.513577	0.0659353	0.560776	0.071905	0.521193	0.0667232	0.523818	0.0675319	0.533885	0.0683917	0.549972	0.0685132	0.537644	0.0685032	0.53383	0.0688272	0.542963	0.0690864	0.55653	0.0690841	0.54938	0.0696601	0.552622	0.0695819	0.562683	0.0696253	0.549292	0.0698314	0.561026	0.0697702	0.558768	0.0695318	0.563564	0.0696184	0.549892	0.0700948
		0.606584	0.0767999	0.710137	0.0881907			0.508577	0.0644089	0.522371	0.0658633	0.524189	0.0662901	0.520487	0.0663561	0.569659	0.0731209	0.528001	0.0671145	0.530562	0.0679831	0.540755	0.0688908	0.557093	0.0689641	0.5447	0.0689521	0.540546	0.0693624	0.550064	0.0694933	0.564077	0.0695328	0.556172	0.0701653	0.559619	0.0700349	0.570001	0.070043	0.556328	0.0702747	0.568347	0.0701877	0.566861	0.0698253	0.571253	0.0700295	0.55679	0.0706181
		0.594327	0.0769649	0.721792	0.0893555			0.516026	0.0649193	0.529673	0.0664679	0.531811	0.0668415	0.528177	0.0669219	0.577516	0.0742744	0.535579	0.0676482	0.538068	0.0685759	0.548402	0.0695323	0.56502	0.0695597	0.552555	0.0695478	0.548022	0.0700361	0.557967	0.0700478	0.572477	0.0701345	0.563733	0.0708093	0.567407	0.0706314	0.578147	0.0706087	0.56416	0.070864	0.576495	0.070754	0.57587	0.0702793	0.579813	0.0705957	0.564468	0.0712829
		0.60307	0.0770324	0.733526	0.0905215			0.524028	0.0655553	0.537517	0.0671906	0.540001	0.0675203	0.536439	0.0676171	0.584004	0.0753151	0.54372	0.0683096	0.546133	0.0692941	0.556617	0.0702986	0.573537	0.0702836	0.560993	0.0702739	0.556054	0.0708298	0.566458	0.0707347	0.581502	0.070873	0.571856	0.0715745	0.575773	0.0713551	0.586899	0.0713068	0.572573	0.0715831	0.58525	0.0714535	0.585549	0.0708815	0.589009	0.0713016	0.572718	0.0720709
		0.604147	0.0775163	0.74534	0.0916888			0.532366	0.0662993	0.545691	0.0680117	0.548533	0.0683081	0.545047	0.0684228	0.588839	0.0761974	0.552202	0.0690807	0.554534	0.0701181	0.565177	0.071169	0.58241	0.0711162	0.569785	0.0711106	0.564423	0.071722	0.575305	0.0715352	0.590906	0.071728	0.58032	0.07244	0.58449	0.0721863	0.596018	0.0721184	0.581339	0.0724123	0.594372	0.0722672	0.595634	0.0716154	0.598591	0.0721281	0.581313	0.0729607
		0.607875	0.0777	0.757235	0.0928574			0.540811	0.0671311	0.55397	0.0689087	0.557175	0.0691832	0.553765	0.069317	0.59181	0.076883	0.560793	0.0699404	0.563045	0.0710255	0.573847	0.0721196	0.591399	0.0720348	0.57869	0.0720351	0.5729	0.0726883	0.584266	0.0724276	0.600431	0.0726762	0.588894	0.0733822	0.593321	0.0731023	0.605255	0.0730213	0.590219	0.0733292	0.603611	0.0731729	0.60585	0.0724609	0.608297	0.0730524	0.59002	0.0739281
		0.604797	0.0783577	0.769211	0.0940271			0.549133	0.0680281	0.56213	0.0698573	0.565692	0.0701218	0.562357	0.0702753	0.592788	0.0773417	0.569259	0.0708654	0.571432	0.0719914	0.582392	0.0731245	0.600258	0.0730142	0.587466	0.0730222	0.581255	0.0737024	0.593096	0.0733874	0.609818	0.0736917	0.597344	0.0743753	0.602023	0.0740781	0.614359	0.0739909	0.59897	0.0743087	0.612717	0.0741459	0.615919	0.0733952	0.617863	0.0740494	0.598602	0.0749465
		0.619306	0.0786582	0.781269	0.0951982			0.557106	0.0689658	0.569948	0.0708315	0.573851	0.0710984	0.570588	0.0712717			0.57737	0.0718303	0.579466	0.0729895	0.590578	0.0741563	0.608745	0.0740278	0.595874	0.0740449	0.58926	0.0747366	0.601556	0.0743886	0.618812	0.0747469	0.60544	0.0753924	0.61036	0.0750871	0.62308	0.0750007	0.607353	0.075324	0.621441	0.0751596	0.625565	0.0743926	0.627027	0.075092	0.606823	0.0759883
		0.635152	0.0789501	0.793408	0.0963705			0.564511	0.0699185	0.577209	0.0718047	0.581429	0.0720862	0.578234	0.0722788			0.584903	0.072809	0.586929	0.0739926	0.598182	0.0751868	0.616628	0.075048	0.603683	0.0750755	0.596696	0.0757626	0.609414	0.0754037	0.627166	0.075813	0.61296	0.0764057	0.618104	0.0761019	0.631182	0.0760232	0.61514	0.0763475	0.629545	0.0761864	0.634526	0.0754259	0.63554	0.0761516	0.61446	0.0770251
		0.615497	0.078964	0.805631	0.097544			0.571147	0.0708603	0.583717	0.0727505	0.588221	0.0730584	0.585085	0.0732693			0.591654	0.0737745	0.593616	0.0749734	0.604997	0.076188	0.623694	0.0760468	0.610681	0.0760856	0.60336	0.0767525	0.616455	0.0764052	0.634653	0.0768608	0.6197	0.0773874	0.625045	0.0770946	0.638442	0.0770305	0.622118	0.0773513	0.636807	0.0771983	0.642557	0.076467	0.643169	0.0771994	0.621305	0.0780285
		0.638996	0.0801981	0.817937	0.0987189			0.576833	0.0717656	0.589294	0.073643	0.59404	0.0739884	0.590955	0.0742161			0.597438	0.0747007	0.599347	0.075905	0.610836	0.0771325	0.629748	0.0769971	0.616678	0.0770479	0.609071	0.0776793	0.622489	0.0773656	0.641069	0.0778619	0.625475	0.0783109	0.630992	0.0780382	0.644664	0.0779951	0.628097	0.0783079	0.64303	0.0781677	0.64944	0.0774875	0.649706	0.0782068	0.62717	0.0789711
		0.626566	0.0802203	0.830326	0.0998949			0.581414	0.0726095	0.593787	0.0744578	0.598728	0.0748509	0.595684	0.0750935			0.602098	0.0755623	0.603963	0.0767622	0.615541	0.0779946	0.634626	0.0778729	0.621509	0.077936	0.613672	0.0785177	0.62735	0.0782588	0.646238	0.0787888	0.630129	0.079151	0.635783	0.078907	0.649677	0.0788907	0.632914	0.0791913	0.648044	0.0790681	0.654985	0.0784595	0.654974	0.0791463	0.631896	0.0798273
		0.648405	0.0808246	0.831439	0.1			0.584765	0.0733692	0.597075	0.0751729	0.602157	0.0756223	0.599142	0.0758773			0.605506	0.0763357	0.607339	0.0775214	0.618983	0.0787507	0.638195	0.0786504	0.625043	0.0787257	0.617039	0.0792449	0.630905	0.0790605	0.65002	0.0796164	0.633534	0.0798847	0.639289	0.0796773	0.653344	0.0796929	0.636438	0.0799774	0.651712	0.079875	0.659043	0.0793565	0.658827	0.0799923	0.635354	0.0805738
		0.642834	0.0810933	IsoLine	IsoLine			0.586793	0.0740238	0.599067	0.0757685	0.604234	0.0762816	0.601237	0.0765464			0.60757	0.0769999	0.609384	0.078162	0.621068	0.0793802	0.640357	0.0793083	0.627183	0.0793955	0.619079	0.0798409	0.633058	0.0797487	0.652311	0.0803219	0.635598	0.080492	0.641412	0.0803281	0.655567	0.0803798	0.638572	0.0806447	0.653934	0.0805663	0.661502	0.080154	0.661162	0.0807217	0.637449	0.08119
		0.637957	0.082087					0.587445	0.0745555	0.599709	0.0762286	0.604901	0.0768107	0.601909	0.0770824			0.608233	0.0775368	0.610041	0.0786665	0.621739	0.0798661	0.641054	0.0798287	0.627871	0.0799271	0.619737	0.0802897	0.63375	0.0803047	0.653049	0.0808863	0.636263	0.0809564	0.642096	0.0808416	0.656283	0.0809326	0.639258	0.0811751	0.65465	0.0811232	0.662296	0.0808304	0.661915	0.0813146	0.638125	0.0816594
		0.662736	0.0823787
		0.656731	0.0836445
		0.80226	0.0967192
		0.81641	0.0999575
		0.869352	0.104195
		0.943661	0.107188
		0.988124	0.113802
		IsoLine	IsoLine
[truncated: 50 more columns]

## Sheet: PlotDat6
Source sheet	all data	0.536312	0.0695188	0.498494	0.0656674	0.528352	0.0689787	0.558806	0.0723004	0.589866	0.0756324	0.47	0.0625622	0.47	0.0624506	0.47	0.0626738	0.46828	0.0623663	0.587445	0.0745555	0.599709	0.0762286	0.604901	0.0768107	0.601909	0.0770824	0.592788	0.0773417	0.572273	0.0740153
Plot name	Concordia2	0.549577	0.0707971	0.498453	0.0656924	0.528309	0.0690051	0.558759	0.072328	0.589816	0.0756613	0.47	0.0625622	0.47	0.0624506	0.47	0.0626738	0.497487	0.0656674	0.586909	0.074898	0.599185	0.076502	0.604353	0.0771455	0.601355	0.0774205	0.59212	0.07753	0.571877	0.0741831
Plot Type	1	0.552574	0.0715121	0.498334	0.0657154	0.528181	0.0690292	0.558623	0.0723534	0.589672	0.0756879	0.474933	0.0631231	0.474933	0.0630105	0.474933	0.0632357	0.527276	0.0689787	0.585388	0.0751358	0.597697	0.0766645	0.602797	0.0773706	0.599785	0.0776466	0.5902	0.0775592	0.570745	0.074264
1st free col	33	0.549119	0.0716681	0.498146	0.0657345	0.527981	0.0690493	0.558409	0.0723745	0.589443	0.07571	0.479883	0.0636843	0.479883	0.0635707	0.479883	0.063798	0.557657	0.0723004	0.582912	0.0752643	0.595271	0.0767128	0.600263	0.0774817	0.597228	0.0777563	0.587079	0.0774283	0.568908	0.0742556
Sigma Level	2	0.546191	0.0716931	0.497905	0.0657481	0.527723	0.0690637	0.558134	0.0723896	0.58915	0.0757258	0.48485	0.0642458	0.48485	0.0641311	0.48485	0.0643605	0.588642	0.0756324	0.579528	0.075281	0.591956	0.0766459	0.596801	0.0774766	0.593735	0.0777476	0.582842	0.077141	0.566417	0.0741581
Absolute Errs	FALSE	IsoLine	IsoLine	0.49763	0.0657552	0.527429	0.0690712	0.55782	0.0723974	0.588816	0.075734	0.489833	0.0648076	0.489833	0.0646919	0.489833	0.0649233	IsoLine	IsoLine	0.575304	0.0751855	0.587817	0.0764652	0.592478	0.0773554	0.589374	0.0776205	0.577606	0.0767051	0.563339	0.0739743
Symbol Type	1			0.497344	0.0657552	0.527122	0.0690712	0.557493	0.0723974	0.588468	0.075734	0.494833	0.0653697	0.494833	0.065253	0.494833	0.0654864			0.570321	0.0749797	0.582933	0.0761741	0.587379	0.0771205	0.584229	0.0773775	0.571514	0.0761325	0.559758	0.0737092
Inverse Plot	FALSE			0.497069	0.0657481	0.526828	0.0690637	0.557179	0.0723896	0.588133	0.0757258	0.49985	0.0659321	0.49985	0.0658143	0.49985	0.0660499			0.564676	0.0746676	0.5774	0.0757784	0.581602	0.0767764	0.5784	0.0770235	0.56473	0.0754388	0.555773	0.0733699
Color Plot	TRUE			0.496828	0.0657345	0.526571	0.0690493	0.556904	0.0723745	0.58784	0.07571	0.504884	0.0664948	0.504884	0.0663759	0.504884	0.0666136			0.558478	0.0742553	0.571325	0.0752857	0.57526	0.0763299	0.572002	0.0765652	0.557441	0.0746429	0.551491	0.0729657
3D plot	FALSE			0.496641	0.0657154	0.52637	0.0690292	0.55669	0.0723534	0.587612	0.0756879	0.509934	0.0670577	0.509934	0.0669379	0.509934	0.0671776			0.55185	0.0737508	0.564827	0.0747057	0.568476	0.0757896	0.565158	0.0760116	0.549845	0.0737666	0.547029	0.0725077
Linear	FALSE			0.496522	0.0656924	0.526243	0.0690051	0.556554	0.072328	0.587468	0.0756613	0.515002	0.067621	0.515002	0.0675001	0.515002	0.0677419			0.544918	0.0731639	0.558032	0.0740496	0.561383	0.075166	0.558002	0.0753734	0.542149	0.0728337	0.54251	0.0720084
Data Range	AC3:AG7			0.496481	0.0656674	0.526199	0.0689787	0.556508	0.0723004	0.587418	0.0756324	0.520086	0.0681846	0.520086	0.0680627	0.520086	0.0683065			0.53782	0.0725061	0.551073	0.0733302	0.554119	0.0744713	0.550674	0.0746631	0.534563	0.0718697	0.538056	0.0714813
Filled Symbols	FALSE			0.496522	0.0656424	0.526243	0.0689524	0.556554	0.0722728	0.587468	0.0756034	0.525188	0.0687485	0.525188	0.0686255	0.525188	0.0688714			0.530692	0.0717902	0.544085	0.0725615	0.546824	0.073719	0.543315	0.0738945	0.527295	0.0709008	0.533789	0.0709409
ConcAge	TRUE			0.496641	0.0656194	0.52637	0.0689283	0.55669	0.0722474	0.587612	0.0755769	0.530307	0.0693126	0.530307	0.0691886	0.530307	0.0694366			0.523673	0.07103	0.537203	0.0717585	0.539642	0.0729237	0.536069	0.0730826	0.520542	0.0699536	0.529825	0.0704019
ConcSwap	FALSE			0.496828	0.0656003	0.526571	0.0689082	0.556904	0.0722263	0.58784	0.0755548	0.535442	0.0698771	0.535442	0.069752	0.535442	0.0700021			0.5169	0.0702404	0.530562	0.0709367	0.532711	0.072101	0.529077	0.0722432	0.514489	0.0690538	0.526273	0.069879
1st Symbol-row	1			0.497069	0.0655866	0.526828	0.0688938	0.557179	0.0722112	0.588133	0.075539	0.540596	0.0704418	0.540596	0.0703158	0.540596	0.0705679			0.510506	0.0694368	0.524292	0.0701122	0.526167	0.0712668	0.522475	0.0713925	0.5093	0.068226	0.523229	0.0693864
				0.497344	0.0655795	0.527122	0.0688863	0.557493	0.0722034	0.588468	0.0755307	0.545766	0.0710069	0.545766	0.0708798	0.545766	0.071134			0.504613	0.0686348	0.518513	0.0693011	0.520136	0.0704374	0.516391	0.0705472	0.505118	0.0674928	0.520777	0.0689376
				0.49763	0.0655795	0.527429	0.0688863	0.55782	0.0722034	0.588816	0.0755307	0.550954	0.0715723	0.550954	0.0714441	0.550954	0.0717005			0.499338	0.06785	0.513339	0.068519	0.514737	0.0696289	0.510945	0.0697238	0.502056	0.0668742	0.518983	0.0685449
				0.497905	0.0655866	0.527723	0.0688938	0.558134	0.0722112	0.58915	0.075539	0.556159	0.0721379	0.556159	0.0720087	0.556159	0.0722672			0.494782	0.0670976	0.508871	0.0677813	0.510075	0.0688571	0.506242	0.0689382	0.500199	0.066387	0.517896	0.0682189
				0.498146	0.0656003	0.527981	0.0689082	0.558409	0.0722263	0.589443	0.0755548	0.561381	0.0727039	0.561381	0.0725736	0.561381	0.0728342			0.491034	0.0663924	0.505195	0.0671024	0.506239	0.0681369	0.502373	0.0682057	0.499595	0.0660445	0.517546	0.0679685
				0.498334	0.0656194	0.528181	0.0689283	0.558623	0.0722474	0.589672	0.0755769	0.566622	0.0732701	0.566622	0.0731388	0.566622	0.0734015			0.488168	0.0657481	0.502382	0.0664953	0.503306	0.0674824	0.499414	0.0675406	0.500263	0.0658562	0.517942	0.0678006
				0.498453	0.0656424	0.528309	0.0689524	0.558759	0.0722728	0.589816	0.0756034	0.571879	0.0738367	0.571879	0.0737043	0.571879	0.0739691			0.486239	0.0651771	0.500489	0.0659719	0.501331	0.0669064	0.497423	0.0669558	0.502183	0.065827	0.519074	0.0677198
				0.498494	0.0656674	0.528352	0.0689787	0.558806	0.0723004	0.589866	0.0756324	0.577155	0.0744035	0.577155	0.0742701	0.577155	0.074537			0.485284	0.0646907	0.49955	0.0655425	0.500354	0.06642	0.496437	0.0664628	0.505304	0.0659579	0.520911	0.0677282
				ConcTikEll	ConcTikEll	ConcTikEll	ConcTikEll	ConcTikEll	ConcTikEll	ConcTikEll	ConcTikEll	0.582448	0.0749707	0.582448	0.0748362	0.582448	0.0751052			0.485323	0.0642982	0.499586	0.0652154	0.500393	0.0660327	0.496478	0.0660711	0.509541	0.0662452	0.523402	0.0678257
												0.587759	0.0755382	0.587759	0.0754026	0.587759	0.0756737			0.486354	0.0640073	0.500594	0.0649968	0.501448	0.0657521	0.497542	0.0657883	0.514776	0.0666811	0.52648	0.0680095
												0.593087	0.0761059	0.593087	0.0759693	0.593087	0.0762425			0.488358	0.0638237	0.502556	0.0648912	0.503498	0.0655836	0.499611	0.06562	0.520869	0.0672537	0.53006	0.0682746
												0.598434	0.076674	0.598434	0.0765363	0.598434	0.0768116			0.491294	0.063751	0.505433	0.0649006	0.506503	0.0655304	0.502643	0.0655693	0.527653	0.0679474	0.534046	0.0686139
												0.603798	0.0772423	0.603798	0.0771036	0.603798	0.077381			0.495107	0.0637905	0.50917	0.0650247	0.510405	0.0655937	0.50658	0.0656374	0.534942	0.0687433	0.538328	0.069018
												0.609181	0.077811	0.609181	0.0776712	0.609181	0.0779507			0.499723	0.0639415	0.513692	0.0652611	0.515128	0.0657722	0.511345	0.0658229	0.542538	0.0696196	0.54279	0.069476
												0.614581	0.0783799	0.614581	0.0782391	0.614581	0.0785207			0.50505	0.0642011	0.518914	0.0656054	0.520579	0.0660624	0.516845	0.0661221	0.550234	0.0705525	0.547309	0.0699754
												0.62	0.0789492	0.62	0.0788073	0.62	0.079091			0.510986	0.0645642	0.524732	0.0660506	0.526653	0.0664587	0.522973	0.0665293	0.55782	0.0715165	0.551763	0.0705024
												0.62	0.0789492	0.62	0.0788073	0.62	0.079091			0.517414	0.0650237	0.531033	0.0665883	0.533232	0.0669534	0.529611	0.0670365	0.565088	0.0724854	0.55603	0.0710428
												IsoLine	IsoLine	ConcBand	ConcBand	ConcBand	ConcBand			0.524211	0.0655707	0.537696	0.0672078	0.540187	0.0675367	0.536627	0.0676338	0.571841	0.0734326	0.559993	0.0715819
																				0.531243	0.0661945	0.54459	0.0678973	0.547384	0.0681975	0.543887	0.0683097	0.577894	0.0743324	0.563545	0.0721048
																				0.538374	0.0668831	0.551581	0.0686431	0.554681	0.0689227	0.551249	0.069051	0.583083	0.0751602	0.566589	0.0725974
																				0.545464	0.067623	0.558533	0.0694309	0.561937	0.0696984	0.55857	0.0698431	0.587265	0.0758934	0.569042	0.0730462
																				0.552377	0.0683997	0.56531	0.0702453	0.569011	0.0705094	0.565706	0.0706708	0.590326	0.076512	0.570836	0.0734389
																				0.558976	0.0691983	0.571782	0.0710705	0.575765	0.0713399	0.57252	0.0715179	0.592184	0.0769992	0.571923	0.0737649
																				0.565135	0.070003	0.577821	0.0718903	0.582068	0.0721737	0.578878	0.072368	0.592788	0.0773417	0.572273	0.0740153
																				0.570733	0.0707984	0.583311	0.0726888	0.587796	0.0729946	0.584657	0.0732044	Black	Black	Cyan	Cyan
																				0.57566	0.0715688	0.588143	0.0734505	0.59284	0.0737867	0.589744	0.0740109
																				0.579822	0.0722994	0.592226	0.0741606	0.597099	0.0745346	0.59404	0.0747718
																				0.583137	0.0729758	0.595478	0.0748052	0.600492	0.0752236	0.597462	0.0754723
																				0.585541	0.073585	0.597837	0.0753718	0.602952	0.0758403	0.599944	0.0760987
																				0.586986	0.074115	0.599256	0.0758493	0.604431	0.0763728	0.601436	0.0766389
																				0.587445	0.0745555	0.599709	0.0762286	0.604901	0.0768107	0.601909	0.0770824
																				Black	Black	Black	Black	Black	Black	Black	Black

## Sheet: PlotDat5
Source sheet	all data	0.536312	0.0695188	0.45	0.0602713	0.482812	0.0640155	0.587445	0.0745555	0.599709	0.0762286	0.604901	0.0768107	0.601909	0.0770824	0.592788	0.0773417	0.608233	0.0775368	0.610041	0.0786665	0.621739	0.0798661	0.641054	0.0798287	0.627871	0.0799271	0.619737	0.0802897	0.63375	0.0803047	0.653049	0.0808863	0.636263	0.0809564	0.642096	0.0808416	0.656283	0.0809326	0.639258	0.0811751	0.65465	0.0811232	0.662296	0.0808304	0.661915	0.0813146	0.638125	0.0816594
Plot name	Concordia0	0.549577	0.0707971	0.452903	0.0606061	0.512308	0.0673218	0.586702	0.0749499	0.598983	0.0765404	0.604141	0.0771954	0.601142	0.0774707	0.591729	0.0775535	0.607477	0.0779316	0.609292	0.0790212	0.620978	0.0801949	0.640267	0.0801973	0.627088	0.080306	0.618995	0.0805788	0.632962	0.0807134	0.652214	0.0812941	0.635513	0.0812652	0.641321	0.0812038	0.655473	0.0813363	0.638478	0.081554	0.65384	0.0815306	0.661402	0.0813671	0.661064	0.0817549	0.637362	0.0819689
Plot Type	1	0.552574	0.0715121	0.462805	0.0617414	0.542391	0.0706383	0.584585	0.0751961	0.59691	0.0766957	0.601975	0.077425	0.598955	0.0777007	0.58868	0.0775092	0.605322	0.0781737	0.607159	0.0792163	0.618806	0.0803577	0.638016	0.0804043	0.624856	0.0805219	0.616873	0.0807004	0.630716	0.0809635	0.649829	0.0815341	0.633367	0.08141	0.63911	0.0814049	0.65316	0.0815799	0.636253	0.0817711	0.651526	0.0817773	0.658845	0.0817495	0.658633	0.0820304	0.635183	0.0821102
1st free col	157	0.549119	0.0716681	0.472774	0.0628778	0.573073	0.0739651	0.58115	0.0752874	0.593546	0.07669	0.598461	0.0774933	0.59541	0.0777662	0.583774	0.0772107	0.601828	0.0782564	0.603698	0.0792466	0.615283	0.0803501	0.634363	0.0804438	0.621236	0.0805689	0.613429	0.0806512	0.627072	0.0810482	0.645958	0.0815999	0.629884	0.0813867	0.635521	0.0814393	0.649407	0.0816567	0.632643	0.0818206	0.647771	0.0818565	0.654695	0.0819671	0.654689	0.0821338	0.631646	0.0820795
Sigma Level	2	0.546191	0.0716931	0.482812	0.0640155	0.604365	0.0773023	0.576493	0.0752214	0.588982	0.0765236	0.593695	0.0773985	0.590601	0.0776653	0.577225	0.0766711	0.59709	0.0781775	0.599005	0.0791112	0.610503	0.0801724	0.629409	0.0803148	0.616325	0.0804457	0.608757	0.0804326	0.622131	0.0809653	0.640708	0.0814896	0.625158	0.0811962	0.630653	0.0813061	0.644315	0.0815647	0.627747	0.081701	0.642677	0.0817662	0.649065	0.0820141	0.649339	0.0820622	0.626847	0.0818776
Absolute Errs	FALSE	0.556215	0.0723312	0.492917	0.0651545	0.636279	0.0806498	0.57074	0.0749998	0.583343	0.076201	0.587807	0.0771431	0.584661	0.0774008	0.56932	0.0759139	0.591237	0.0779391	0.593207	0.0788138	0.604597	0.0798293	0.623287	0.0800208	0.610259	0.0801557	0.602984	0.0800505	0.616026	0.080717	0.634221	0.0812062	0.61932	0.0808434	0.624639	0.0810089	0.638024	0.0813062	0.621698	0.0814157	0.636384	0.0815087	0.642109	0.0818892	0.642729	0.0818175	0.620918	0.0815099
Symbol Type	1	0.558512	0.0731729	0.503092	0.0662946	0.668829	0.0840077	0.564047	0.0746288	0.576784	0.075731	0.580959	0.0767341	0.577751	0.07698	0.560405	0.0749722	0.584429	0.0775478	0.586463	0.0783626	0.597728	0.0793301	0.616166	0.0795699	0.603202	0.0797067	0.596268	0.0795153	0.608925	0.08031	0.626674	0.0807575	0.612528	0.0803382	0.617642	0.0805559	0.630706	0.0808885	0.614662	0.0809723	0.629064	0.0810911	0.634016	0.0815957	0.635039	0.0814064	0.61402	0.0809866
Inverse Plot	FALSE	0.569241	0.0741105	0.513336	0.067436	0.702025	0.087376	0.556598	0.0741183	0.569482	0.0751264	0.573336	0.0761827	0.570061	0.0764143	0.550868	0.0738872	0.576851	0.0770141	0.578956	0.0777698	0.590081	0.0786887	0.608239	0.0789744	0.595348	0.079111	0.588792	0.0788417	0.601021	0.0797556	0.618273	0.0801558	0.604967	0.0796942	0.609855	0.0799594	0.62256	0.0803228	0.60683	0.0803831	0.620915	0.0805249	0.625007	0.0811417	0.62648	0.0808402	0.606342	0.0803218
Color Plot	FALSE	0.58663	0.074267	0.523649	0.0685786	0.735883	0.0907549	0.548596	0.0734824	0.561638	0.0744037	0.565147	0.0755038	0.561799	0.0757191	0.541126	0.0727064	0.56871	0.0763527	0.570892	0.0770516	0.581866	0.0779223	0.599723	0.0782504	0.586909	0.0783849	0.58076	0.0780479	0.59253	0.0790687	0.609248	0.0794173	0.596844	0.078929	0.601488	0.0792357	0.613808	0.0796247	0.598417	0.079664	0.612161	0.0798253	0.615328	0.0805395	0.617283	0.0801343	0.598092	0.0795338
3D plot	FALSE	0.573951	0.0743294	0.534033	0.0697224	0.770413	0.0941442	0.540258	0.0727384	0.553464	0.0735826	0.556615	0.0747161	0.553191	0.0749134	0.531607	0.0714812	0.560228	0.0755816	0.56249	0.0762276	0.573306	0.0770519	0.590849	0.0774178	0.578118	0.0775482	0.572391	0.0771557	0.583684	0.0782682	0.599845	0.0785623	0.58838	0.0780636	0.592771	0.0784045	0.604689	0.0788131	0.58965	0.0788347	0.603039	0.0790116	0.605242	0.0798056	0.607702	0.0793079	0.589497	0.078644
Linear	FALSE	0.568407	0.0744389	0.544488	0.0708674	0.805631	0.097544	0.531813	0.0719065	0.545184	0.0726856	0.547972	0.073841	0.544473	0.0740192	0.522724	0.0702653	0.551637	0.0747219	0.55398	0.0753203	0.564636	0.0761013	0.58186	0.0764993	0.569212	0.0766237	0.563914	0.0761894	0.574723	0.0773758	0.59032	0.0776141	0.579806	0.0771214	0.58394	0.0774885	0.595452	0.0779102	0.580771	0.0779178	0.593799	0.0781059	0.595026	0.07896	0.597996	0.0783835	0.580789	0.0776766
Data Range	AC3:AG48	0.579494	0.0749017	0.555014	0.0720136	IsoLine	IsoLine	0.523491	0.0710095	0.537025	0.071737	0.539456	0.0729024	0.535881	0.0730608	0.514867	0.0691118	0.543171	0.0737969	0.545593	0.0743543	0.556091	0.0750965	0.573002	0.0755198	0.560436	0.0756366	0.555559	0.0751753	0.565892	0.076416	0.580932	0.0765985	0.571356	0.0761282	0.575238	0.0765126	0.586349	0.0769406	0.57202	0.0769384	0.584693	0.0771329	0.584957	0.0780258	0.58843	0.0773865	0.572208	0.0766582
Filled Symbols	FALSE	0.595375	0.0751451	0.565612	0.0731611			0.515518	0.0700719	0.529207	0.0707628	0.531297	0.0719258	0.52765	0.0720645	0.508379	0.0680711	0.535061	0.072832	0.537559	0.0733562	0.547905	0.0740647	0.564515	0.0745062	0.552029	0.0746139	0.547554	0.0741412	0.557433	0.0754148	0.571939	0.0755434	0.56326	0.0751111	0.566901	0.0755036	0.577627	0.0759308	0.563637	0.075923	0.57597	0.0761192	0.575311	0.0770284	0.579266	0.0763439	0.563987	0.0756164
ConcAge	FALSE	0.58435	0.0752518	0.576282	0.0743098			0.508113	0.0691192	0.521945	0.0697895	0.523718	0.0709379	0.520005	0.0710573	0.503544	0.0671888	0.527527	0.0718534	0.530096	0.0723531	0.540301	0.0730341	0.556631	0.0734861	0.54422	0.0735834	0.540118	0.0731152	0.549575	0.0743997	0.563585	0.0744773	0.55574	0.0740979	0.559157	0.0744889	0.569526	0.0749083	0.55585	0.0748995	0.567866	0.0750924	0.56635	0.0759951	0.570753	0.0752843	0.55635	0.0745796
ConcSwap	FALSE	0.588631	0.0752954	0.587024	0.0754598			0.501477	0.0681773	0.515437	0.0688438	0.516926	0.0699657	0.513153	0.0700668	0.500573	0.0665032	0.520776	0.0708878	0.523408	0.0713723	0.533486	0.0720329	0.549566	0.0724872	0.537221	0.0725732	0.533454	0.0721252	0.542533	0.0733982	0.556098	0.0734295	0.549	0.0731161	0.552216	0.0734962	0.562265	0.073901	0.548872	0.0738958	0.560604	0.0740805	0.558319	0.074954	0.563124	0.0742365	0.549505	0.0735762
1st Symbol-row	1	0.600354	0.0754657	0.59784	0.076611			0.495791	0.0672721	0.509861	0.0679513	0.511107	0.0690357	0.507283	0.06912	0.499595	0.0660445	0.514992	0.0699616	0.517678	0.0704407	0.527647	0.0710884	0.543512	0.0715369	0.531225	0.0716109	0.527743	0.0711984	0.5365	0.0724378	0.549682	0.0724284	0.543224	0.0721926	0.546269	0.0725525	0.556044	0.0729364	0.542893	0.0729392	0.554381	0.0731112	0.551437	0.0739335	0.556586	0.0732291	0.54364	0.0726336
		0.585495	0.0756235	0.60873	0.0777634			0.49121	0.0664281	0.505367	0.0671364	0.506419	0.0681733	0.502554	0.0682427	0.500654	0.0658327	0.510332	0.0691	0.513062	0.0695835	0.522942	0.0702264	0.538633	0.0706611	0.526394	0.0707228	0.523142	0.07036	0.531639	0.0715446	0.544513	0.0715015	0.53857	0.0713525	0.541478	0.0716837	0.551031	0.0720408	0.538076	0.0720558	0.549367	0.0722108	0.545891	0.0729615	0.551319	0.0722896	0.538914	0.0717774
		0.598705	0.0756394	0.619693	0.078917			0.48786	0.0656685	0.50208	0.0664214	0.50299	0.0674019	0.499096	0.0674588	0.503703	0.065877	0.506924	0.0683266	0.509685	0.0688243	0.5195	0.0694702	0.535065	0.0698837	0.52286	0.0699331	0.519775	0.0696329	0.528084	0.0707429	0.540731	0.0706739	0.535165	0.0706188	0.537972	0.0709134	0.547363	0.0712386	0.534552	0.0712697	0.545698	0.0714039	0.541833	0.0720645	0.547465	0.0714436	0.535456	0.0710309
		0.600438	0.0757105	0.630732	0.0800719			0.485831	0.0650139	0.500088	0.0658257	0.500914	0.0667426	0.497002	0.0667897	0.508609	0.0661755	0.50486	0.0676624	0.507641	0.0681837	0.517415	0.0688407	0.532902	0.0692258	0.52072	0.0692633	0.517735	0.0690368	0.525931	0.0700547	0.53844	0.0699683	0.533102	0.0700115	0.535849	0.0702626	0.545141	0.0705517	0.532418	0.0706024	0.543476	0.0707126	0.539374	0.071267	0.545131	0.0707142	0.533361	0.0704147
		0.603146	0.075718	0.641846	0.081228			0.485179	0.0644821	0.499446	0.0653657	0.500246	0.0662134	0.496329	0.0662538	0.515158	0.0667151	0.504198	0.0671255	0.506984	0.0676792	0.516744	0.0683549	0.532205	0.0687054	0.520032	0.0687317	0.517077	0.0685881	0.525239	0.0694987	0.537702	0.069404	0.532436	0.0695471	0.535165	0.0697491	0.544425	0.0699989	0.531731	0.070072	0.54276	0.0701556	0.538581	0.0705906	0.544378	0.0701213	0.532685	0.0699453
		0.585405	0.0758023	0.653035	0.0823853			0.485922	0.0640878	0.500172	0.0650538	0.501006	0.0658288	0.497096	0.0658655	0.523063	0.0674723	0.504954	0.0667307	0.507732	0.0673245	0.517504	0.0680261	0.532993	0.0683367	0.520814	0.0683528	0.517819	0.068299	0.526027	0.06909	0.538536	0.0689962	0.533187	0.0692383	0.53594	0.0693869	0.545234	0.0695951	0.532512	0.0696931	0.543571	0.0697483	0.539475	0.0700539	0.545229	0.0696811	0.533447	0.0696358
		0.598758	0.0758997	0.664301	0.0835439			0.48804	0.0638416	0.502245	0.0648986	0.503173	0.0655992	0.499283	0.0656354	0.531978	0.068414	0.507108	0.0664886	0.509866	0.0671294	0.519676	0.0678632	0.535244	0.0681298	0.523046	0.0681369	0.519941	0.0681773	0.528273	0.0688399	0.540922	0.0687562	0.535333	0.0690936	0.538152	0.0691859	0.547547	0.0693516	0.534737	0.0694759	0.545885	0.0695016	0.542031	0.0696715	0.547659	0.0694055	0.535627	0.0694945
		0.594293	0.0761822	0.675643	0.0847037			0.491474	0.0637503	0.505609	0.0649043	0.506687	0.0655309	0.502829	0.06557	0.541515	0.069499	0.510602	0.0664059	0.513327	0.0670991	0.5232	0.0678708	0.538896	0.0680903	0.526667	0.0680899	0.523385	0.0682265	0.531917	0.0687552	0.544793	0.0686904	0.538816	0.0691168	0.541741	0.0691515	0.551301	0.0692748	0.538347	0.0694265	0.54964	0.0694224	0.546181	0.0694538	0.551604	0.0693021	0.539164	0.0695252
		0.592462	0.0764312	0.687063	0.0858648			0.496131	0.0638163	0.510173	0.0650707	0.511453	0.0656257	0.507637	0.0656708	0.551257	0.0706798	0.51534	0.0664848	0.51802	0.0672345	0.52798	0.0680485	0.543851	0.0682193	0.531577	0.0682131	0.528057	0.0684451	0.536858	0.0688381	0.550043	0.0688007	0.543541	0.0693074	0.546608	0.0692847	0.556392	0.0693668	0.543243	0.069546	0.554733	0.0695127	0.551811	0.0694068	0.556954	0.0693737	0.543963	0.0697271
		0.599599	0.0765505	0.698561	0.0870271			0.501885	0.0640378	0.515811	0.0653933	0.51734	0.0658811	0.513577	0.0659353	0.560776	0.071905	0.521193	0.0667232	0.523818	0.0675319	0.533885	0.0683917	0.549972	0.0685132	0.537644	0.0685032	0.53383	0.0688272	0.542963	0.0690864	0.55653	0.0690841	0.54938	0.0696601	0.552622	0.0695819	0.562683	0.0696253	0.549292	0.0698314	0.561026	0.0697702	0.558768	0.0695318	0.563564	0.0696184	0.549892	0.0700948
		0.606584	0.0767999	0.710137	0.0881907			0.508577	0.0644089	0.522371	0.0658633	0.524189	0.0662901	0.520487	0.0663561	0.569659	0.0731209	0.528001	0.0671145	0.530562	0.0679831	0.540755	0.0688908	0.557093	0.0689641	0.5447	0.0689521	0.540546	0.0693624	0.550064	0.0694933	0.564077	0.0695328	0.556172	0.0701653	0.559619	0.0700349	0.570001	0.070043	0.556328	0.0702747	0.568347	0.0701877	0.566861	0.0698253	0.571253	0.0700295	0.55679	0.0706181
		0.594327	0.0769649	0.721792	0.0893555			0.516026	0.0649193	0.529673	0.0664679	0.531811	0.0668415	0.528177	0.0669219	0.577516	0.0742744	0.535579	0.0676482	0.538068	0.0685759	0.548402	0.0695323	0.56502	0.0695597	0.552555	0.0695478	0.548022	0.0700361	0.557967	0.0700478	0.572477	0.0701345	0.563733	0.0708093	0.567407	0.0706314	0.578147	0.0706087	0.56416	0.070864	0.576495	0.070754	0.57587	0.0702793	0.579813	0.0705957	0.564468	0.0712829
		0.60307	0.0770324	0.733526	0.0905215			0.524028	0.0655553	0.537517	0.0671906	0.540001	0.0675203	0.536439	0.0676171	0.584004	0.0753151	0.54372	0.0683096	0.546133	0.0692941	0.556617	0.0702986	0.573537	0.0702836	0.560993	0.0702739	0.556054	0.0708298	0.566458	0.0707347	0.581502	0.070873	0.571856	0.0715745	0.575773	0.0713551	0.586899	0.0713068	0.572573	0.0715831	0.58525	0.0714535	0.585549	0.0708815	0.589009	0.0713016	0.572718	0.0720709
		0.604147	0.0775163	0.74534	0.0916888			0.532366	0.0662993	0.545691	0.0680117	0.548533	0.0683081	0.545047	0.0684228	0.588839	0.0761974	0.552202	0.0690807	0.554534	0.0701181	0.565177	0.071169	0.58241	0.0711162	0.569785	0.0711106	0.564423	0.071722	0.575305	0.0715352	0.590906	0.071728	0.58032	0.07244	0.58449	0.0721863	0.596018	0.0721184	0.581339	0.0724123	0.594372	0.0722672	0.595634	0.0716154	0.598591	0.0721281	0.581313	0.0729607
		0.607875	0.0777	0.757235	0.0928574			0.540811	0.0671311	0.55397	0.0689087	0.557175	0.0691832	0.553765	0.069317	0.59181	0.076883	0.560793	0.0699404	0.563045	0.0710255	0.573847	0.0721196	0.591399	0.0720348	0.57869	0.0720351	0.5729	0.0726883	0.584266	0.0724276	0.600431	0.0726762	0.588894	0.0733822	0.593321	0.0731023	0.605255	0.0730213	0.590219	0.0733292	0.603611	0.0731729	0.60585	0.0724609	0.608297	0.0730524	0.59002	0.0739281
		0.604797	0.0783577	0.769211	0.0940271			0.549133	0.0680281	0.56213	0.0698573	0.565692	0.0701218	0.562357	0.0702753	0.592788	0.0773417	0.569259	0.0708654	0.571432	0.0719914	0.582392	0.0731245	0.600258	0.0730142	0.587466	0.0730222	0.581255	0.0737024	0.593096	0.0733874	0.609818	0.0736917	0.597344	0.0743753	0.602023	0.0740781	0.614359	0.0739909	0.59897	0.0743087	0.612717	0.0741459	0.615919	0.0733952	0.617863	0.0740494	0.598602	0.0749465
		0.619306	0.0786582	0.781269	0.0951982			0.557106	0.0689658	0.569948	0.0708315	0.573851	0.0710984	0.570588	0.0712717	Black	Black	0.57737	0.0718303	0.579466	0.0729895	0.590578	0.0741563	0.608745	0.0740278	0.595874	0.0740449	0.58926	0.0747366	0.601556	0.0743886	0.618812	0.0747469	0.60544	0.0753924	0.61036	0.0750871	0.62308	0.0750007	0.607353	0.075324	0.621441	0.0751596	0.625565	0.0743926	0.627027	0.075092	0.606823	0.0759883
		0.635152	0.0789501	0.793408	0.0963705			0.564511	0.0699185	0.577209	0.0718047	0.581429	0.0720862	0.578234	0.0722788			0.584903	0.072809	0.586929	0.0739926	0.598182	0.0751868	0.616628	0.075048	0.603683	0.0750755	0.596696	0.0757626	0.609414	0.0754037	0.627166	0.075813	0.61296	0.0764057	0.618104	0.0761019	0.631182	0.0760232	0.61514	0.0763475	0.629545	0.0761864	0.634526	0.0754259	0.63554	0.0761516	0.61446	0.0770251
		0.615497	0.078964	0.805631	0.097544			0.571147	0.0708603	0.583717	0.0727505	0.588221	0.0730584	0.585085	0.0732693			0.591654	0.0737745	0.593616	0.0749734	0.604997	0.076188	0.623694	0.0760468	0.610681	0.0760856	0.60336	0.0767525	0.616455	0.0764052	0.634653	0.0768608	0.6197	0.0773874	0.625045	0.0770946	0.638442	0.0770305	0.622118	0.0773513	0.636807	0.0771983	0.642557	0.076467	0.643169	0.0771994	0.621305	0.0780285
		0.638996	0.0801981	0.817937	0.0987189			0.576833	0.0717656	0.589294	0.073643	0.59404	0.0739884	0.590955	0.0742161			0.597438	0.0747007	0.599347	0.075905	0.610836	0.0771325	0.629748	0.0769971	0.616678	0.0770479	0.609071	0.0776793	0.622489	0.0773656	0.641069	0.0778619	0.625475	0.0783109	0.630992	0.0780382	0.644664	0.0779951	0.628097	0.0783079	0.64303	0.0781677	0.64944	0.0774875	0.649706	0.0782068	0.62717	0.0789711
		0.626566	0.0802203	0.830326	0.0998949			0.581414	0.0726095	0.593787	0.0744578	0.598728	0.0748509	0.595684	0.0750935			0.602098	0.0755623	0.603963	0.0767622	0.615541	0.0779946	0.634626	0.0778729	0.621509	0.077936	0.613672	0.0785177	0.62735	0.0782588	0.646238	0.0787888	0.630129	0.079151	0.635783	0.078907	0.649677	0.0788907	0.632914	0.0791913	0.648044	0.0790681	0.654985	0.0784595	0.654974	0.0791463	0.631896	0.0798273
		0.648405	0.0808246	0.831439	0.1			0.584765	0.0733692	0.597075	0.0751729	0.602157	0.0756223	0.599142	0.0758773			0.605506	0.0763357	0.607339	0.0775214	0.618983	0.0787507	0.638195	0.0786504	0.625043	0.0787257	0.617039	0.0792449	0.630905	0.0790605	0.65002	0.0796164	0.633534	0.0798847	0.639289	0.0796773	0.653344	0.0796929	0.636438	0.0799774	0.651712	0.079875	0.659043	0.0793565	0.658827	0.0799923	0.635354	0.0805738
		0.642834	0.0810933	IsoLine	IsoLine			0.586793	0.0740238	0.599067	0.0757685	0.604234	0.0762816	0.601237	0.0765464			0.60757	0.0769999	0.609384	0.078162	0.621068	0.0793802	0.640357	0.0793083	0.627183	0.0793955	0.619079	0.0798409	0.633058	0.0797487	0.652311	0.0803219	0.635598	0.080492	0.641412	0.0803281	0.655567	0.0803798	0.638572	0.0806447	0.653934	0.0805663	0.661502	0.080154	0.661162	0.0807217	0.637449	0.08119
		0.637957	0.082087					0.587445	0.0745555	0.599709	0.0762286	0.604901	0.0768107	0.601909	0.0770824			0.608233	0.0775368	0.610041	0.0786665	0.621739	0.0798661	0.641054	0.0798287	0.627871	0.0799271	0.619737	0.0802897	0.63375	0.0803047	0.653049	0.0808863	0.636263	0.0809564	0.642096	0.0808416	0.656283	0.0809326	0.639258	0.0811751	0.65465	0.0811232	0.662296	0.0808304	0.661915	0.0813146	0.638125	0.0816594
		0.662736	0.0823787					Black	Black	Black	Black	Black	Black	Black	Black			Black	Black	Black	Black	Black	Black	Black	Black	Black	Black	Black	Black	Black	Black	Black	Black	Black	Black	Black	Black	Black	Black	Black	Black	Black	Black	Black	Black	Black	Black	Black	Black
		0.656731	0.0836445
		0.80226	0.0967192
		0.81641	0.0999575
		0.869352	0.104195
		0.943661	0.107188
		0.988124	0.113802
		IsoLine	IsoLine
[truncated: 106 more columns]

## Sheet: PlotDat4
Source sheet	all data	0.536312	0.0695188	0.498494	0.0656674	0.528352	0.0689787	0.558806	0.0723004	0.589866	0.0756324	0.47	0.0625622	0.47	0.0624506	0.47	0.0626738	0.46828	0.0623663	0.587445	0.0745555	0.599709	0.0762286	0.604901	0.0768107	0.601909	0.0770824	0.592788	0.0773417	0.572273	0.0740153
Plot name	Concordia2	0.549577	0.0707971	0.498453	0.0656924	0.528309	0.0690051	0.558759	0.072328	0.589816	0.0756613	0.47	0.0625622	0.47	0.0624506	0.47	0.0626738	0.497487	0.0656674	0.586909	0.074898	0.599185	0.076502	0.604353	0.0771455	0.601355	0.0774205	0.59212	0.07753	0.571877	0.0741831
Plot Type	1	0.552574	0.0715121	0.498334	0.0657154	0.528181	0.0690292	0.558623	0.0723534	0.589672	0.0756879	0.474933	0.0631231	0.474933	0.0630105	0.474933	0.0632357	0.527276	0.0689787	0.585388	0.0751358	0.597697	0.0766645	0.602797	0.0773706	0.599785	0.0776466	0.5902	0.0775592	0.570745	0.074264
1st free col	33	0.549119	0.0716681	0.498146	0.0657345	0.527981	0.0690493	0.558409	0.0723745	0.589443	0.07571	0.479883	0.0636843	0.479883	0.0635707	0.479883	0.063798	0.557657	0.0723004	0.582912	0.0752643	0.595271	0.0767128	0.600263	0.0774817	0.597228	0.0777563	0.587079	0.0774283	0.568908	0.0742556
Sigma Level	2	0.546191	0.0716931	0.497905	0.0657481	0.527723	0.0690637	0.558134	0.0723896	0.58915	0.0757258	0.48485	0.0642458	0.48485	0.0641311	0.48485	0.0643605	0.588642	0.0756324	0.579528	0.075281	0.591956	0.0766459	0.596801	0.0774766	0.593735	0.0777476	0.582842	0.077141	0.566417	0.0741581
Absolute Errs	FALSE	IsoLine	IsoLine	0.49763	0.0657552	0.527429	0.0690712	0.55782	0.0723974	0.588816	0.075734	0.489833	0.0648076	0.489833	0.0646919	0.489833	0.0649233	IsoLine	IsoLine	0.575304	0.0751855	0.587817	0.0764652	0.592478	0.0773554	0.589374	0.0776205	0.577606	0.0767051	0.563339	0.0739743
Symbol Type	1			0.497344	0.0657552	0.527122	0.0690712	0.557493	0.0723974	0.588468	0.075734	0.494833	0.0653697	0.494833	0.065253	0.494833	0.0654864			0.570321	0.0749797	0.582933	0.0761741	0.587379	0.0771205	0.584229	0.0773775	0.571514	0.0761325	0.559758	0.0737092
Inverse Plot	FALSE			0.497069	0.0657481	0.526828	0.0690637	0.557179	0.0723896	0.588133	0.0757258	0.49985	0.0659321	0.49985	0.0658143	0.49985	0.0660499			0.564676	0.0746676	0.5774	0.0757784	0.581602	0.0767764	0.5784	0.0770235	0.56473	0.0754388	0.555773	0.0733699
Color Plot	FALSE			0.496828	0.0657345	0.526571	0.0690493	0.556904	0.0723745	0.58784	0.07571	0.504884	0.0664948	0.504884	0.0663759	0.504884	0.0666136			0.558478	0.0742553	0.571325	0.0752857	0.57526	0.0763299	0.572002	0.0765652	0.557441	0.0746429	0.551491	0.0729657
3D plot	FALSE			0.496641	0.0657154	0.52637	0.0690292	0.55669	0.0723534	0.587612	0.0756879	0.509934	0.0670577	0.509934	0.0669379	0.509934	0.0671776			0.55185	0.0737508	0.564827	0.0747057	0.568476	0.0757896	0.565158	0.0760116	0.549845	0.0737666	0.547029	0.0725077
Linear	FALSE			0.496522	0.0656924	0.526243	0.0690051	0.556554	0.072328	0.587468	0.0756613	0.515002	0.067621	0.515002	0.0675001	0.515002	0.0677419			0.544918	0.0731639	0.558032	0.0740496	0.561383	0.075166	0.558002	0.0753734	0.542149	0.0728337	0.54251	0.0720084
Data Range	AC3:AG7			0.496481	0.0656674	0.526199	0.0689787	0.556508	0.0723004	0.587418	0.0756324	0.520086	0.0681846	0.520086	0.0680627	0.520086	0.0683065			0.53782	0.0725061	0.551073	0.0733302	0.554119	0.0744713	0.550674	0.0746631	0.534563	0.0718697	0.538056	0.0714813
Filled Symbols	FALSE			0.496522	0.0656424	0.526243	0.0689524	0.556554	0.0722728	0.587468	0.0756034	0.525188	0.0687485	0.525188	0.0686255	0.525188	0.0688714			0.530692	0.0717902	0.544085	0.0725615	0.546824	0.073719	0.543315	0.0738945	0.527295	0.0709008	0.533789	0.0709409
ConcAge	TRUE			0.496641	0.0656194	0.52637	0.0689283	0.55669	0.0722474	0.587612	0.0755769	0.530307	0.0693126	0.530307	0.0691886	0.530307	0.0694366			0.523673	0.07103	0.537203	0.0717585	0.539642	0.0729237	0.536069	0.0730826	0.520542	0.0699536	0.529825	0.0704019
ConcSwap	FALSE			0.496828	0.0656003	0.526571	0.0689082	0.556904	0.0722263	0.58784	0.0755548	0.535442	0.0698771	0.535442	0.069752	0.535442	0.0700021			0.5169	0.0702404	0.530562	0.0709367	0.532711	0.072101	0.529077	0.0722432	0.514489	0.0690538	0.526273	0.069879
1st Symbol-row	1			0.497069	0.0655866	0.526828	0.0688938	0.557179	0.0722112	0.588133	0.075539	0.540596	0.0704418	0.540596	0.0703158	0.540596	0.0705679			0.510506	0.0694368	0.524292	0.0701122	0.526167	0.0712668	0.522475	0.0713925	0.5093	0.068226	0.523229	0.0693864
				0.497344	0.0655795	0.527122	0.0688863	0.557493	0.0722034	0.588468	0.0755307	0.545766	0.0710069	0.545766	0.0708798	0.545766	0.071134			0.504613	0.0686348	0.518513	0.0693011	0.520136	0.0704374	0.516391	0.0705472	0.505118	0.0674928	0.520777	0.0689376
				0.49763	0.0655795	0.527429	0.0688863	0.55782	0.0722034	0.588816	0.0755307	0.550954	0.0715723	0.550954	0.0714441	0.550954	0.0717005			0.499338	0.06785	0.513339	0.068519	0.514737	0.0696289	0.510945	0.0697238	0.502056	0.0668742	0.518983	0.0685449
				0.497905	0.0655866	0.527723	0.0688938	0.558134	0.0722112	0.58915	0.075539	0.556159	0.0721379	0.556159	0.0720087	0.556159	0.0722672			0.494782	0.0670976	0.508871	0.0677813	0.510075	0.0688571	0.506242	0.0689382	0.500199	0.066387	0.517896	0.0682189
				0.498146	0.0656003	0.527981	0.0689082	0.558409	0.0722263	0.589443	0.0755548	0.561381	0.0727039	0.561381	0.0725736	0.561381	0.0728342			0.491034	0.0663924	0.505195	0.0671024	0.506239	0.0681369	0.502373	0.0682057	0.499595	0.0660445	0.517546	0.0679685
				0.498334	0.0656194	0.528181	0.0689283	0.558623	0.0722474	0.589672	0.0755769	0.566622	0.0732701	0.566622	0.0731388	0.566622	0.0734015			0.488168	0.0657481	0.502382	0.0664953	0.503306	0.0674824	0.499414	0.0675406	0.500263	0.0658562	0.517942	0.0678006
				0.498453	0.0656424	0.528309	0.0689524	0.558759	0.0722728	0.589816	0.0756034	0.571879	0.0738367	0.571879	0.0737043	0.571879	0.0739691			0.486239	0.0651771	0.500489	0.0659719	0.501331	0.0669064	0.497423	0.0669558	0.502183	0.065827	0.519074	0.0677198
				0.498494	0.0656674	0.528352	0.0689787	0.558806	0.0723004	0.589866	0.0756324	0.577155	0.0744035	0.577155	0.0742701	0.577155	0.074537			0.485284	0.0646907	0.49955	0.0655425	0.500354	0.06642	0.496437	0.0664628	0.505304	0.0659579	0.520911	0.0677282
				ConcTikEll	ConcTikEll	ConcTikEll	ConcTikEll	ConcTikEll	ConcTikEll	ConcTikEll	ConcTikEll	0.582448	0.0749707	0.582448	0.0748362	0.582448	0.0751052			0.485323	0.0642982	0.499586	0.0652154	0.500393	0.0660327	0.496478	0.0660711	0.509541	0.0662452	0.523402	0.0678257
												0.587759	0.0755382	0.587759	0.0754026	0.587759	0.0756737			0.486354	0.0640073	0.500594	0.0649968	0.501448	0.0657521	0.497542	0.0657883	0.514776	0.0666811	0.52648	0.0680095
												0.593087	0.0761059	0.593087	0.0759693	0.593087	0.0762425			0.488358	0.0638237	0.502556	0.0648912	0.503498	0.0655836	0.499611	0.06562	0.520869	0.0672537	0.53006	0.0682746
												0.598434	0.076674	0.598434	0.0765363	0.598434	0.0768116			0.491294	0.063751	0.505433	0.0649006	0.506503	0.0655304	0.502643	0.0655693	0.527653	0.0679474	0.534046	0.0686139
												0.603798	0.0772423	0.603798	0.0771036	0.603798	0.077381			0.495107	0.0637905	0.50917	0.0650247	0.510405	0.0655937	0.50658	0.0656374	0.534942	0.0687433	0.538328	0.069018
												0.609181	0.077811	0.609181	0.0776712	0.609181	0.0779507			0.499723	0.0639415	0.513692	0.0652611	0.515128	0.0657722	0.511345	0.0658229	0.542538	0.0696196	0.54279	0.069476
												0.614581	0.0783799	0.614581	0.0782391	0.614581	0.0785207			0.50505	0.0642011	0.518914	0.0656054	0.520579	0.0660624	0.516845	0.0661221	0.550234	0.0705525	0.547309	0.0699754
												0.62	0.0789492	0.62	0.0788073	0.62	0.079091			0.510986	0.0645642	0.524732	0.0660506	0.526653	0.0664587	0.522973	0.0665293	0.55782	0.0715165	0.551763	0.0705024
												0.62	0.0789492	0.62	0.0788073	0.62	0.079091			0.517414	0.0650237	0.531033	0.0665883	0.533232	0.0669534	0.529611	0.0670365	0.565088	0.0724854	0.55603	0.0710428
												IsoLine	IsoLine	ConcBand	ConcBand	ConcBand	ConcBand			0.524211	0.0655707	0.537696	0.0672078	0.540187	0.0675367	0.536627	0.0676338	0.571841	0.0734326	0.559993	0.0715819
																				0.531243	0.0661945	0.54459	0.0678973	0.547384	0.0681975	0.543887	0.0683097	0.577894	0.0743324	0.563545	0.0721048
																				0.538374	0.0668831	0.551581	0.0686431	0.554681	0.0689227	0.551249	0.069051	0.583083	0.0751602	0.566589	0.0725974
																				0.545464	0.067623	0.558533	0.0694309	0.561937	0.0696984	0.55857	0.0698431	0.587265	0.0758934	0.569042	0.0730462
																				0.552377	0.0683997	0.56531	0.0702453	0.569011	0.0705094	0.565706	0.0706708	0.590326	0.076512	0.570836	0.0734389
																				0.558976	0.0691983	0.571782	0.0710705	0.575765	0.0713399	0.57252	0.0715179	0.592184	0.0769992	0.571923	0.0737649
																				0.565135	0.070003	0.577821	0.0718903	0.582068	0.0721737	0.578878	0.072368	0.592788	0.0773417	0.572273	0.0740153
																				0.570733	0.0707984	0.583311	0.0726888	0.587796	0.0729946	0.584657	0.0732044	Black	Black
																				0.57566	0.0715688	0.588143	0.0734505	0.59284	0.0737867	0.589744	0.0740109
																				0.579822	0.0722994	0.592226	0.0741606	0.597099	0.0745346	0.59404	0.0747718
																				0.583137	0.0729758	0.595478	0.0748052	0.600492	0.0752236	0.597462	0.0754723
																				0.585541	0.073585	0.597837	0.0753718	0.602952	0.0758403	0.599944	0.0760987
																				0.586986	0.074115	0.599256	0.0758493	0.604431	0.0763728	0.601436	0.0766389
																				0.587445	0.0745555	0.599709	0.0762286	0.604901	0.0768107	0.601909	0.0770824
																				Black	Black	Black	Black	Black	Black	Black	Black

## Sheet: PlotDat3
Source sheet	all data	0.569241	0.0741105	0.528352	0.0689787	0.558806	0.0723004	0.589866	0.0756324	0.621545	0.0789747	0.653855	0.0823274	0.500457	0.066	0.501514	0.066	0.5	0.0660666	0.497487	0.0656674	0.621739	0.0798661	0.627871	0.0799271	0.63375	0.0803047	0.636263	0.0809564	0.642096	0.0808416	0.639258	0.0811751	0.606943	0.0777477
Plot name	Concordia1	0.573951	0.0743294	0.528309	0.0690051	0.558759	0.072328	0.589816	0.0756613	0.621492	0.079005	0.653799	0.082359	0.500457	0.066	0.505694	0.0664662	0.500457	0.0661179	0.527276	0.0689787	0.62119	0.0801544	0.627306	0.0802576	0.633181	0.08066	0.635722	0.0812278	0.641537	0.0811579	0.638695	0.0815055	0.606553	0.0779282
Plot Type	1	0.579494	0.0749017	0.528181	0.0690292	0.558623	0.0723534	0.589672	0.0756879	0.621338	0.0790328	0.653636	0.0823881	0.505694	0.0665852	0.51095	0.0670507	0.505694	0.0667042	0.557657	0.0723004	0.619631	0.0803252	0.625703	0.0804727	0.631568	0.0809031	0.634181	0.0813828	0.639949	0.08136	0.637097	0.0817214	0.605442	0.0780266
1st free col	37	0.58435	0.0752518	0.527981	0.0690493	0.558409	0.0723745	0.589443	0.07571	0.621096	0.0790559	0.653379	0.0824122	0.51095	0.0671708	0.516224	0.0676355	0.51095	0.0672908	0.588642	0.0756324	0.61709	0.080375	0.623093	0.0805682	0.628941	0.0810295	0.63167	0.0814185	0.637361	0.0814441	0.634494	0.0818186	0.60364	0.07804
Sigma Level	2	0.588631	0.0752954	0.527723	0.0690637	0.558134	0.0723896	0.58915	0.0757258	0.620784	0.0790724	0.653048	0.0824294	0.516224	0.0677566	0.521516	0.0682206	0.516224	0.0678778	0.620244	0.0789747	0.613618	0.0803028	0.619526	0.0805423	0.625351	0.0810366	0.628238	0.0813342	0.633826	0.0814085	0.630938	0.0817952	0.601194	0.0779682
Absolute Errs	FALSE	0.585495	0.0756235	0.527429	0.0690712	0.55782	0.0723974	0.588816	0.075734	0.620429	0.079081	0.652671	0.0824384	0.521516	0.0683428	0.526827	0.068806	0.521516	0.068465	0.652474	0.0823274	0.609283	0.0801102	0.615072	0.0803955	0.620869	0.0809242	0.623952	0.0811315	0.62941	0.081254	0.626497	0.0816517	0.598174	0.077813
Symbol Type	1	IsoLine	IsoLine	0.527122	0.0690712	0.557493	0.0723974	0.588468	0.075734	0.620058	0.079081	0.652277	0.0824384	0.526827	0.0689293	0.532157	0.0693917	0.526827	0.0690526	IsoLine	IsoLine	0.604168	0.0798007	0.609817	0.0801306	0.615582	0.0806947	0.618895	0.0808144	0.624201	0.0809834	0.621258	0.0813909	0.59466	0.0775788
Inverse Plot	FALSE			0.526828	0.0690637	0.557179	0.0723896	0.588133	0.0757258	0.619703	0.0790724	0.6519	0.0824294	0.532157	0.0695161	0.537504	0.0699778	0.532157	0.0696405			0.598373	0.0793805	0.603865	0.0797527	0.609592	0.0803524	0.613166	0.080389	0.618299	0.0806022	0.615323	0.0810179	0.590748	0.0772719
Color Plot	FALSE			0.526571	0.0690493	0.556904	0.0723745	0.58784	0.07571	0.619391	0.0790559	0.651569	0.0824122	0.537504	0.0701033	0.542871	0.0705642	0.537504	0.0702287			0.592011	0.0788577	0.59733	0.0792694	0.603016	0.079904	0.606875	0.0798635	0.61182	0.0801176	0.608807	0.0805398	0.586546	0.0769007
3D plot	FALSE			0.52637	0.0690292	0.55669	0.0723534	0.587612	0.0756879	0.619149	0.0790328	0.651312	0.0823881	0.542871	0.0706907	0.548256	0.0711509	0.542871	0.0708173			0.585206	0.0782425	0.59034	0.0786898	0.595983	0.0793582	0.600146	0.0792484	0.60489	0.0795392	0.601837	0.079966	0.582168	0.0764754
Linear	FALSE			0.526243	0.0690051	0.556554	0.072328	0.587468	0.0756613	0.618995	0.079005	0.651148	0.082359	0.548256	0.0712785	0.553661	0.0717379	0.548256	0.0714062			0.57809	0.0775469	0.583032	0.0780254	0.588628	0.0787257	0.59311	0.0785554	0.597643	0.0788782	0.59455	0.0793078	0.577733	0.0760074
Data Range	AC9:AG19			0.526199	0.0689787	0.556508	0.0723004	0.587418	0.0756324	0.618942	0.0789747	0.651092	0.0823274	0.553661	0.0718666	0.559084	0.0723253	0.553661	0.0719954			0.570802	0.0767844	0.575546	0.0772891	0.581096	0.0780188	0.585904	0.0777982	0.590221	0.0781475	0.587086	0.0785778	0.573362	0.0755096
Filled Symbols	FALSE			0.526243	0.0689524	0.556554	0.0722728	0.587468	0.0756034	0.618995	0.0789445	0.651148	0.0822958	0.559084	0.0724551	0.564526	0.0729129	0.559084	0.0725849			0.563484	0.0759699	0.56803	0.0764951	0.573533	0.0772512	0.578667	0.0769913	0.582768	0.0773613	0.579591	0.0777903	0.569175	0.0749956
ConcAge	TRUE			0.52637	0.0689283	0.55669	0.0722474	0.587612	0.0755769	0.619149	0.0789166	0.651312	0.0822668	0.564526	0.0730438	0.569987	0.0735009	0.564526	0.0731748			0.556278	0.0751192	0.560628	0.075659	0.566086	0.0764379	0.57154	0.0761506	0.575428	0.0765348	0.572212	0.0769606	0.565286	0.0744793
ConcSwap	FALSE			0.526571	0.0689082	0.556904	0.0722263	0.58784	0.0755548	0.619391	0.0788935	0.651569	0.0822427	0.569987	0.0736329	0.575467	0.0740892	0.569987	0.0737649			0.549324	0.0742488	0.553486	0.0747971	0.558899	0.0755946	0.564663	0.0752925	0.568346	0.0756842	0.56509	0.0761049	0.5618	0.073975
1st Symbol-row	1			0.526828	0.0688938	0.557179	0.0722112	0.588133	0.075539	0.619703	0.078877	0.6519	0.0822254	0.575467	0.0742223	0.580966	0.0746779	0.575467	0.0743554			0.542758	0.0733758	0.546743	0.073926	0.552114	0.0747379	0.558169	0.0744335	0.561659	0.0748261	0.558366	0.0752399	0.558813	0.0734962
				0.527122	0.0688863	0.557493	0.0722034	0.588468	0.0755307	0.620058	0.0788684	0.652277	0.0822164	0.580966	0.0748121	0.586484	0.0752668	0.580966	0.0749463			0.536707	0.072517	0.540529	0.0730628	0.545861	0.0738844	0.552185	0.0735905	0.555497	0.073977	0.55217	0.0743823	0.556407	0.0730561
				0.527429	0.0688863	0.55782	0.0722034	0.588816	0.0755307	0.620429	0.0788684	0.652671	0.0822164	0.586484	0.0754021	0.592022	0.0758561	0.586484	0.0755374			0.531289	0.0716893	0.534965	0.0722242	0.540263	0.0730507	0.546827	0.0727797	0.549979	0.0731537	0.546623	0.0735489	0.554647	0.0726667
				0.527723	0.0688938	0.558134	0.0722112	0.58915	0.075539	0.620784	0.078877	0.653048	0.0822254	0.592022	0.0759925	0.597579	0.0764457	0.592022	0.0761289			0.52661	0.0709086	0.530161	0.0714266	0.535429	0.072253	0.542199	0.0720172	0.545214	0.072372	0.541832	0.0727558	0.553581	0.0723387
				0.527981	0.0689082	0.558409	0.0722263	0.589443	0.0755548	0.621096	0.0788935	0.653379	0.0822427	0.597579	0.0765832	0.603155	0.0770357	0.597579	0.0767207			0.522761	0.0701903	0.526208	0.0706855	0.531452	0.0715068	0.538392	0.0713175	0.541294	0.0716472	0.537891	0.0720186	0.553237	0.0720808
				0.528181	0.0689283	0.558623	0.0722474	0.589672	0.0755769	0.621338	0.0789166	0.653636	0.0822668	0.603155	0.0771742	0.608751	0.0776259	0.603155	0.0773128			0.519817	0.0695483	0.523185	0.0700153	0.528411	0.0708267	0.535479	0.0706945	0.538295	0.0709935	0.534876	0.0713515	0.553627	0.0719003
				0.528309	0.0689524	0.558759	0.0722728	0.589816	0.0756034	0.621492	0.0789445	0.653799	0.0822958	0.608751	0.0777656	0.614366	0.0782165	0.608751	0.0779053			0.517835	0.0689951	0.52115	0.0694291	0.526364	0.070226	0.533517	0.0701601	0.536276	0.0704234	0.532847	0.0707676	0.554738	0.071802
				0.528352	0.0689787	0.558806	0.0723004	0.589866	0.0756324	0.621545	0.0789747	0.653855	0.0823274	0.614366	0.0783573	0.620001	0.0788074	0.614366	0.078498			0.516853	0.0685415	0.520143	0.0689383	0.52535	0.0697162	0.532545	0.0697249	0.535276	0.0699482	0.531842	0.0702782	0.556541	0.0717885
				ConcTikEll	ConcTikEll	ConcTikEll	ConcTikEll	ConcTikEll	ConcTikEll	ConcTikEll	ConcTikEll	ConcTikEll	ConcTikEll	0.620001	0.0789493	0.625656	0.0793986	0.620001	0.0790911			0.516891	0.0681963	0.520183	0.0685524	0.525391	0.0693074	0.532581	0.0693972	0.535315	0.0695771	0.531882	0.0698928	0.558986	0.0718604
														0.625656	0.0795416	0.63133	0.0799902	0.625656	0.0796846			0.517947	0.0679661	0.52127	0.0682789	0.526485	0.0690075	0.533624	0.0691834	0.536391	0.0693173	0.532966	0.069619	0.562007	0.0720155
														0.63133	0.0801342	0.637024	0.080582	0.63133	0.0802783			0.520003	0.0678556	0.523382	0.0681233	0.52861	0.0688223	0.535655	0.0690878	0.538484	0.0691738	0.535071	0.0694621	0.565521	0.0722497
														0.637024	0.0807272	0.642738	0.0811742	0.637024	0.0808724			0.523016	0.0678668	0.526478	0.0680884	0.531726	0.0687554	0.538634	0.0691122	0.541553	0.0691495	0.538158	0.0694251	0.569432	0.0725566
														0.642738	0.0813205	0.648472	0.0817667	0.642738	0.0814668			0.526929	0.0679995	0.530498	0.0681749	0.535772	0.0688081	0.542503	0.0692561	0.545538	0.0692448	0.542167	0.0695087	0.573634	0.0729278
														0.648472	0.0819141	0.654226	0.0823596	0.648472	0.0820615			0.531666	0.0682512	0.535364	0.0683813	0.540669	0.0689795	0.547186	0.0695166	0.550363	0.0694578	0.547019	0.0697113	0.578013	0.0733532
														0.654226	0.0825081	0.66	0.0829528	0.654226	0.0826566			0.537134	0.0686169	0.540981	0.0687035	0.546321	0.0692661	0.552592	0.0698888	0.555931	0.0697845	0.55262	0.070029	0.582448	0.0738211
														0.66	0.0831024	0.66	0.0829528	0.66	0.083252			0.543228	0.0690896	0.54724	0.0691351	0.552619	0.0696624	0.558617	0.0703654	0.562137	0.0702185	0.55886	0.0704557	0.586818	0.0743189
														0.66	0.0831024	ConcBand	ConcBand	0.66	0.083252			0.549827	0.0696599	0.554019	0.0696679	0.55944	0.0701607	0.565142	0.0709371	0.568858	0.0707512	0.565619	0.0709828	0.591005	0.074833
														IsoLine	IsoLine			ConcBand	ConcBand			0.556804	0.0703169	0.561186	0.0702914	0.566652	0.0707513	0.572041	0.0715927	0.575964	0.0713725	0.572765	0.0716004	0.594895	0.0753492
																						0.564024	0.0710478	0.568601	0.0709934	0.574113	0.0714226	0.57918	0.0723196	0.583316	0.07207	0.580159	0.0722962	0.59838	0.0758536
																						0.571345	0.0718382	0.57612	0.0717604	0.581679	0.0721617	0.586419	0.0731036	0.590772	0.0728304	0.587656	0.0730568	0.601367	0.0763323
																						0.578625	0.0726729	0.583597	0.0725775	0.589203	0.0729541	0.593619	0.0739293	0.598187	0.0736387	0.595112	0.0738673	0.603773	0.0767724
																						0.585722	0.0735355	0.590887	0.0734286	0.596538	0.0737844	0.600637	0.0747808	0.605415	0.0744793	0.60238	0.0747121	0.605534	0.0771618
																						0.592499	0.0744094	0.597846	0.0742972	0.603541	0.0746365	0.607339	0.0756415	0.612316	0.0753357	0.60932	0.0755745	0.6066	0.0774899
																						0.598823	0.0752774	0.604341	0.0751665	0.610076	0.0754937	0.613593	0.0764946	0.618757	0.0761914	0.615796	0.076438	0.606943	0.0777477
																						0.604571	0.0761227	0.610244	0.0760195	0.616015	0.0763394	0.619279	0.0773235	0.624611	0.0770296	0.621682	0.0772855
																						0.609631	0.0769288	0.615441	0.0768395	0.621244	0.0771571	0.624284	0.0781121	0.629765	0.0778341	0.626863	0.0781008
																						0.613906	0.0776801	0.61983	0.0776108	0.62566	0.0779309	0.628512	0.078845	0.634118	0.0785892	0.63124	0.0788678
																						0.617311	0.0783619	0.623326	0.0783181	0.629178	0.0786457	0.63188	0.0795079	0.637586	0.0792801	0.634726	0.0795716
																						0.61978	0.078961	0.625861	0.0789479	0.631729	0.0792877	0.634323	0.080088	0.640101	0.0798935	0.637254	0.0801986
																						0.621266	0.0794656	0.627386	0.0794877	0.633263	0.0798443	0.635794	0.080574	0.641614	0.0804174	0.638775	0.0807366
																						0.621739	0.0798661	0.627871	0.0799271	0.63375	0.0803047	0.636263	0.0809564	0.642096	0.0808416	0.639258	0.0811751
																						Black	Black	Black	Black	Black	Black	Black	Black	Black	Black	Black	Black

## Sheet: PlotDat7
Source sheet	all data	0.585405	0.0758023	0.543504	0.0706383	0.574259	0.0739651	0.605627	0.0773023	0.637621	0.0806498	0.670251	0.0840077	0.52	0.068175	0.52	0.0680531	0.52	0.0682969	0.512308	0.0673218	0.638125	0.0816594	0.647078	0.0820249	0.651535	0.0816893	0.655947	0.0820666	0.65767	0.0826945	0.659419	0.0837006	0.623645	0.0794842
Plot name	Concordia3	0.594293	0.0761822	0.543459	0.0706652	0.574211	0.0739934	0.605576	0.0773318	0.637566	0.0806807	0.670194	0.08404	0.52	0.068175	0.52	0.0680531	0.52	0.0682969	0.542391	0.0706383	0.637575	0.0819316	0.646529	0.0822891	0.650917	0.0821259	0.655357	0.0824337	0.6571	0.0830162	0.658845	0.0839677	0.623247	0.0796622
Plot Type	1	0.592462	0.0764312	0.543327	0.07069	0.574071	0.0740194	0.605427	0.077359	0.637408	0.0807091	0.670025	0.0840696	0.525255	0.0687558	0.525255	0.0686329	0.525255	0.0688788	0.573073	0.0739651	0.63601	0.0820846	0.644963	0.0824345	0.649161	0.0824516	0.653683	0.0826863	0.655478	0.0832215	0.657206	0.0841093	0.62211	0.0797557
1st free col	37	0.599599	0.0765505	0.54312	0.0707106	0.57385	0.0740409	0.605192	0.0773816	0.637158	0.0807327	0.66976	0.0840942	0.530528	0.069337	0.530528	0.0692129	0.530528	0.069461	0.604365	0.0773023	0.63346	0.0821153	0.642411	0.0824581	0.646301	0.0826602	0.650955	0.0828194	0.652835	0.0833064	0.654534	0.0841226	0.620265	0.0797621
Sigma Level	2	0.60307	0.0770324	0.542853	0.0707253	0.573566	0.0740564	0.604889	0.0773978	0.636837	0.0807496	0.66942	0.0841119	0.535819	0.0699184	0.535819	0.0697933	0.535819	0.0700435	0.636279	0.0806498	0.629975	0.0820232	0.638922	0.0823596	0.642394	0.0827475	0.647228	0.0828306	0.649225	0.0832691	0.650881	0.0840073	0.617764	0.0796813
Absolute Errs	FALSE	0.604147	0.0775163	0.54255	0.070733	0.573242	0.0740644	0.604545	0.0774062	0.63647	0.0807584	0.669031	0.084121	0.541129	0.0705002	0.541129	0.070374	0.541129	0.0706264	0.668829	0.0840077	0.625622	0.0818099	0.634565	0.0821408	0.637514	0.0827119	0.642574	0.0827195	0.644716	0.0831104	0.646319	0.0837656	0.614672	0.0795154
Symbol Type	1	IsoLine	IsoLine	0.542233	0.070733	0.572904	0.0740644	0.604185	0.0774062	0.636089	0.0807584	0.668626	0.084121	0.546456	0.0710823	0.546456	0.070955	0.546456	0.0712095	IsoLine	IsoLine	0.620486	0.0814797	0.629424	0.0818061	0.631758	0.082554	0.637083	0.0824883	0.639396	0.0828334	0.640936	0.0834023	0.611076	0.0792689
Inverse Plot	FALSE			0.541929	0.0707253	0.57258	0.0740564	0.603841	0.0773978	0.635722	0.0807496	0.668238	0.0841119	0.551803	0.0716646	0.551803	0.0715363	0.551803	0.071793			0.614668	0.0810391	0.623599	0.0813619	0.625237	0.082277	0.630863	0.0821415	0.633369	0.0824435	0.634837	0.0829245	0.607074	0.0789487
Color Plot	FALSE			0.541663	0.0707106	0.572296	0.0740409	0.603538	0.0773816	0.635401	0.0807327	0.667897	0.0840942	0.557167	0.0722474	0.557167	0.0721179	0.557167	0.0723768			0.60828	0.0804965	0.617203	0.0808169	0.618077	0.0818862	0.624034	0.081686	0.626753	0.0819483	0.62814	0.0823414	0.602773	0.0785633
3D plot	FALSE			0.541455	0.07069	0.572075	0.0740194	0.603303	0.077359	0.635151	0.0807091	0.667632	0.0840696	0.562551	0.0728304	0.562551	0.0726999	0.562551	0.0729609			0.601446	0.0798625	0.610362	0.0801817	0.61042	0.0813892	0.61673	0.0811305	0.619675	0.0813574	0.620977	0.0816643	0.598292	0.0781234
Linear	FALSE			0.541324	0.0706652	0.571935	0.0739934	0.603154	0.0773318	0.634993	0.0806807	0.667464	0.08404	0.567953	0.0734137	0.567953	0.0732821	0.567953	0.0735453			0.594301	0.0791495	0.603208	0.0794686	0.602412	0.0807957	0.609092	0.0804858	0.612275	0.0806823	0.613486	0.0809066	0.593754	0.0776409
Data Range	AC20:AG31			0.541279	0.0706383	0.571887	0.0739651	0.603103	0.0773023	0.634938	0.0806498	0.667406	0.0840077	0.573373	0.0739974	0.573373	0.0738647	0.573373	0.0741301			0.586982	0.0783713	0.59588	0.0786916	0.594211	0.0801173	0.60127	0.0797645	0.604695	0.0799362	0.605813	0.0800828	0.58928	0.0771291
Filled Symbols	FALSE			0.541324	0.0706113	0.571935	0.0739368	0.603154	0.0772727	0.634993	0.0806188	0.667464	0.0839754	0.578813	0.0745814	0.578813	0.0744476	0.578813	0.0747151			0.579633	0.0775432	0.588522	0.0778657	0.585976	0.0793671	0.593414	0.0789807	0.597084	0.0791336	0.598108	0.0792091	0.584995	0.0766017
ConcAge	TRUE			0.541455	0.0705865	0.572075	0.0739108	0.603303	0.0772455	0.635151	0.0805904	0.667632	0.0839458	0.584271	0.0751657	0.584271	0.0750308	0.584271	0.0753005			0.572396	0.0766811	0.581276	0.0770071	0.577868	0.0785597	0.58568	0.0781496	0.589589	0.07829	0.590521	0.0783024	0.581014	0.0760734
ConcSwap	FALSE			0.541663	0.070566	0.572296	0.0738893	0.603538	0.0772229	0.635401	0.0805668	0.667897	0.0839212	0.589748	0.0757503	0.589748	0.0756144	0.589748	0.0758862			0.565412	0.075802	0.574283	0.0761324	0.570043	0.077711	0.578216	0.0772873	0.582356	0.077422	0.583198	0.0773805	0.577447	0.0755583
1st Symbol-row	1			0.541929	0.0705512	0.57258	0.0738738	0.603841	0.0772067	0.635722	0.0805499	0.668238	0.0839035	0.595244	0.0763352	0.595244	0.0761982	0.595244	0.0764722			0.558817	0.0749229	0.56768	0.0752587	0.562655	0.0768373	0.571168	0.0764108	0.575527	0.0765464	0.576284	0.0764611	0.57439	0.0750707
				0.542233	0.0705436	0.572904	0.0738658	0.604185	0.0771983	0.636089	0.0805411	0.668626	0.0838944	0.600759	0.0769205	0.600759	0.0767824	0.600759	0.0770586			0.55274	0.0740609	0.561595	0.0744029	0.555846	0.0759557	0.564674	0.0755369	0.569234	0.0756803	0.569911	0.0755623	0.571927	0.0746238
				0.54255	0.0705436	0.573242	0.0738658	0.604545	0.0771983	0.63647	0.0805411	0.669031	0.0838944	0.606293	0.077506	0.606293	0.0773668	0.606293	0.0776452			0.547299	0.0732327	0.556146	0.0735818	0.549751	0.0750834	0.55886	0.0746827	0.563599	0.0748405	0.564206	0.0747016	0.570125	0.0742298
				0.542853	0.0705512	0.573566	0.0738738	0.604889	0.0772067	0.636837	0.0805499	0.66942	0.0839035	0.611846	0.0780919	0.611846	0.0779516	0.611846	0.0782322			0.542599	0.0724546	0.55144	0.0728113	0.544487	0.0742373	0.553838	0.073865	0.558733	0.0740433	0.559277	0.0738956	0.569033	0.0738994
				0.54312	0.070566	0.57385	0.0738893	0.605192	0.0772229	0.637158	0.0805668	0.66976	0.0839212	0.617418	0.0786781	0.617418	0.0785368	0.617418	0.0788195			0.538733	0.0717417	0.547567	0.0721064	0.540156	0.0734339	0.549707	0.0730994	0.554729	0.0733043	0.555222	0.0731601	0.568682	0.0736416
				0.543327	0.0705865	0.574071	0.0739108	0.605427	0.0772455	0.637408	0.0805904	0.670025	0.0839458	0.62301	0.0792646	0.62301	0.0791222	0.62301	0.0794071			0.535775	0.0711078	0.544605	0.0714809	0.536844	0.0726889	0.546548	0.0724011	0.551667	0.0726379	0.552119	0.0725094	0.56908	0.0734636
				0.543459	0.0706113	0.574211	0.0739368	0.605576	0.0772727	0.637566	0.0806188	0.670194	0.0839754	0.628621	0.0798515	0.628621	0.0797079	0.628621	0.079995			0.533783	0.0705653	0.542609	0.0709468	0.534614	0.0720167	0.54442	0.0717835	0.549605	0.072057	0.550029	0.0719562	0.570216	0.0733701
				0.543504	0.0706383	0.574259	0.0739651	0.605627	0.0773023	0.637621	0.0806498	0.670251	0.0840077	0.634251	0.0804387	0.634251	0.080294	0.634251	0.0805833			0.532795	0.0701247	0.541619	0.0705147	0.53351	0.0714304	0.543367	0.0712587	0.548584	0.071573	0.548992	0.0715111	0.572061	0.0733637
				ConcTikEll	ConcTikEll	ConcTikEll	ConcTikEll	ConcTikEll	ConcTikEll	ConcTikEll	ConcTikEll	ConcTikEll	ConcTikEll	0.639901	0.0810261	0.639901	0.0808804	0.639901	0.0811719			0.532832	0.0697946	0.541655	0.0701928	0.533553	0.0709415	0.543408	0.0708369	0.548623	0.0711952	0.549029	0.071183	0.574563	0.0734445
														0.64557	0.0816139	0.64557	0.0814671	0.64557	0.0817608			0.533892	0.0695814	0.542715	0.0699876	0.534744	0.0705594	0.544543	0.0705263	0.549722	0.070931	0.550138	0.0709781	0.577654	0.0736104
														0.651259	0.0822021	0.651259	0.0820541	0.651259	0.08235			0.535954	0.0694893	0.544779	0.0699029	0.537057	0.0702916	0.54675	0.070333	0.551859	0.0707856	0.552299	0.0709005	0.58125	0.0738569
														0.656968	0.0827905	0.656968	0.0826415	0.656968	0.0829395			0.538979	0.0695201	0.547807	0.0699404	0.540449	0.0701433	0.549985	0.0702606	0.554993	0.0707618	0.555469	0.0709516	0.585253	0.0741772
														0.662696	0.0833793	0.662696	0.0832291	0.662696	0.0835294			0.542908	0.0696732	0.55174	0.0700994	0.544853	0.0701173	0.554186	0.0703107	0.559063	0.07086	0.559586	0.0711305	0.589553	0.0745625
														0.668444	0.0839683	0.668444	0.0838171	0.668444	0.0841196			0.547664	0.0699456	0.556501	0.0703768	0.550184	0.0702143	0.559271	0.0704823	0.563989	0.0710784	0.564571	0.0714337	0.594034	0.0750024
														0.674212	0.0845577	0.674212	0.0844054	0.674212	0.0847101			0.553155	0.070332	0.561997	0.0707672	0.556338	0.0704323	0.565141	0.070772	0.569676	0.0714127	0.570326	0.0718553	0.598573	0.0754849
														0.68	0.0851475	0.68	0.084994	0.68	0.0853009			0.559273	0.0708248	0.568122	0.071263	0.563195	0.070767	0.571681	0.0711741	0.576013	0.0718563	0.57674	0.0723871	0.603046	0.0759968
														0.68	0.0851475	0.68	0.084994	0.68	0.0853009			0.565899	0.0714145	0.574757	0.0718546	0.570621	0.071212	0.578765	0.0716809	0.582877	0.0724007	0.583686	0.0730187	0.607331	0.0765241
														IsoLine	IsoLine	ConcBand	ConcBand	ConcBand	ConcBand			0.572906	0.0720897	0.581771	0.0725304	0.578473	0.0717586	0.586254	0.0722824	0.590134	0.0730352	0.591031	0.0737379	0.611312	0.0770525
																						0.580156	0.0728371	0.58903	0.0732772	0.586597	0.0723961	0.594003	0.072967	0.597642	0.0737475	0.598632	0.0745306	0.614879	0.0775675
																						0.587508	0.0736422	0.596391	0.0740807	0.594835	0.0731122	0.601861	0.0737214	0.605256	0.0745238	0.606339	0.0753814	0.617936	0.0780551
																						0.594819	0.0744893	0.603711	0.074925	0.603027	0.0738928	0.609675	0.0745309	0.612828	0.0753489	0.614004	0.0762738	0.620399	0.078502
																						0.601946	0.075362	0.610848	0.0757937	0.611013	0.0747229	0.617293	0.0753796	0.62021	0.0762068	0.621478	0.0771903	0.622201	0.0788961
																						0.608752	0.0762433	0.617662	0.0766701	0.618638	0.0755862	0.624566	0.0762512	0.627258	0.0770807	0.628614	0.0781132	0.623293	0.0792264
																						0.615103	0.077116	0.624022	0.0775369	0.625754	0.076466	0.631354	0.0771285	0.633835	0.0779537	0.635273	0.0790245	0.623645	0.0794842
																						0.620877	0.0779632	0.629803	0.0783774	0.632221	0.0773451	0.637523	0.0779946	0.639813	0.0788087	0.641327	0.0799064
																						0.62596	0.0787682	0.634893	0.0791752	0.637915	0.0782064	0.642954	0.0788327	0.645077	0.0796292	0.646657	0.0807418
																						0.630253	0.0795156	0.639193	0.0799147	0.642724	0.0790331	0.647542	0.0796262	0.649522	0.0803992	0.65116	0.0815144
																						0.633674	0.0801906	0.642619	0.0805815	0.646555	0.0798092	0.651196	0.08036	0.653064	0.0811036	0.654748	0.0822092
																						0.636155	0.0807803	0.645104	0.0811627	0.649333	0.0805196	0.653846	0.0810195	0.655632	0.0817288	0.657351	0.0828126
																						0.637648	0.0812731	0.6466	0.081647	0.651004	0.0811504	0.65544	0.0815921	0.657178	0.0822625	0.658918	0.083313
																						0.638125	0.0816594	0.647078	0.0820249	0.651535	0.0816893	0.655947	0.0820666	0.65767	0.0826945	0.659419	0.0837006
																						Black	Black	Black	Black	Black	Black	Black	Black	Black	Black	Black	Black

## Sheet: PlotDat8
Source sheet	all data	0.585405	0.0758023	0.543504	0.0706383	0.574259	0.0739651	0.605627	0.0773023	0.637621	0.0806498	0.670251	0.0840077	0.52	0.068175	0.52	0.0680531	0.52	0.0682969	0.512308	0.0673218	0.638125	0.0816594	0.647078	0.0820249	0.651535	0.0816893	0.655947	0.0820666	0.65767	0.0826945	0.624737	0.0795431
Plot name	Concordia4	0.594293	0.0761822	0.543459	0.0706652	0.574211	0.0739934	0.605576	0.0773318	0.637566	0.0806807	0.670194	0.08404	0.52	0.068175	0.52	0.0680531	0.52	0.0682969	0.542391	0.0706383	0.637575	0.0819316	0.646529	0.0822891	0.650917	0.0821259	0.655357	0.0824337	0.6571	0.0830162	0.624302	0.0797448
Plot Type	1	0.592462	0.0764312	0.543327	0.07069	0.574071	0.0740194	0.605427	0.077359	0.637408	0.0807091	0.670025	0.0840696	0.524941	0.0687212	0.524941	0.0685983	0.524941	0.0688441	0.573073	0.0739651	0.63601	0.0820846	0.644963	0.0824345	0.649161	0.0824516	0.653683	0.0826863	0.655478	0.0832215	0.623057	0.0798549
1st free col	35	0.599599	0.0765505	0.54312	0.0707106	0.57385	0.0740409	0.605192	0.0773816	0.637158	0.0807327	0.66976	0.0840942	0.529898	0.0692676	0.529898	0.0691437	0.529898	0.0693915	0.604365	0.0773023	0.63346	0.0821153	0.642411	0.0824581	0.646301	0.0826602	0.650955	0.0828194	0.652835	0.0833064	0.621039	0.0798705
Sigma Level	2	0.60307	0.0770324	0.542853	0.0707253	0.573566	0.0740564	0.604889	0.0773978	0.636837	0.0807496	0.66942	0.0841119	0.534871	0.0698143	0.534871	0.0696894	0.534871	0.0699393	0.636279	0.0806498	0.629975	0.0820232	0.638922	0.0823596	0.642394	0.0827475	0.647228	0.0828306	0.649225	0.0832691	0.618301	0.0797912
Absolute Errs	FALSE	IsoLine	IsoLine	0.54255	0.070733	0.573242	0.0740644	0.604545	0.0774062	0.63647	0.0807584	0.669031	0.084121	0.53986	0.0703613	0.53986	0.0702354	0.53986	0.0704873	0.668829	0.0840077	0.625622	0.0818099	0.634565	0.0821408	0.637514	0.0827119	0.642574	0.0827195	0.644716	0.0831104	0.614918	0.0796192
Symbol Type	1			0.542233	0.070733	0.572904	0.0740644	0.604185	0.0774062	0.636089	0.0807584	0.668626	0.084121	0.544865	0.0709086	0.544865	0.0707817	0.544865	0.0710356	IsoLine	IsoLine	0.620486	0.0814797	0.629424	0.0818061	0.631758	0.082554	0.637083	0.0824883	0.639396	0.0828334	0.610983	0.079359
Inverse Plot	FALSE			0.541929	0.0707253	0.57258	0.0740564	0.603841	0.0773978	0.635722	0.0807496	0.668238	0.0841119	0.549887	0.0714562	0.549887	0.0713282	0.549887	0.0715841			0.614668	0.0810391	0.623599	0.0813619	0.625237	0.082277	0.630863	0.0821415	0.633369	0.0824435	0.606603	0.0790179
Color Plot	FALSE			0.541663	0.0707106	0.572296	0.0740409	0.603538	0.0773816	0.635401	0.0807327	0.667897	0.0840942	0.554925	0.072004	0.554925	0.071875	0.554925	0.072133			0.60828	0.0804965	0.617203	0.0808169	0.618077	0.0818862	0.624034	0.081686	0.626753	0.0819483	0.601897	0.0786051
3D plot	FALSE			0.541455	0.07069	0.572075	0.0740194	0.603303	0.077359	0.635151	0.0807091	0.667632	0.0840696	0.559979	0.0725521	0.559979	0.0724221	0.559979	0.0726821			0.601446	0.0798625	0.610362	0.0801817	0.61042	0.0813892	0.61673	0.0811305	0.619675	0.0813574	0.596994	0.0781319
Linear	FALSE			0.541324	0.0706652	0.571935	0.0739934	0.603154	0.0773318	0.634993	0.0806807	0.667464	0.08404	0.56505	0.0731005	0.56505	0.0729695	0.56505	0.0732315			0.594301	0.0791495	0.603208	0.0794686	0.602412	0.0807957	0.609092	0.0804858	0.612275	0.0806823	0.592028	0.0776112
Data Range	AC20:AG30			0.541279	0.0706383	0.571887	0.0739651	0.603103	0.0773023	0.634938	0.0806498	0.667406	0.0840077	0.570137	0.0736492	0.570137	0.0735172	0.570137	0.0737812			0.586982	0.0783713	0.59588	0.0786916	0.594211	0.0801173	0.60127	0.0797645	0.604695	0.0799362	0.587133	0.0770572
Filled Symbols	FALSE			0.541324	0.0706113	0.571935	0.0739368	0.603154	0.0772727	0.634993	0.0806188	0.667464	0.0839754	0.575241	0.0741981	0.575241	0.0740651	0.575241	0.0743312			0.579633	0.0775432	0.588522	0.0778657	0.585976	0.0793671	0.593414	0.0789807	0.597084	0.0791336	0.582444	0.076485
ConcAge	TRUE			0.541455	0.0705865	0.572075	0.0739108	0.603303	0.0772455	0.635151	0.0805904	0.667632	0.0839458	0.580362	0.0747474	0.580362	0.0746133	0.580362	0.0748814			0.572396	0.0766811	0.581276	0.0770071	0.577868	0.0785597	0.58568	0.0781496	0.589589	0.07829	0.578089	0.0759102
ConcSwap	FALSE			0.541663	0.070566	0.572296	0.0738893	0.603538	0.0772229	0.635401	0.0805668	0.667897	0.0839212	0.585499	0.0752969	0.585499	0.0751618	0.585499	0.075432			0.565412	0.075802	0.574283	0.0761324	0.570043	0.077711	0.578216	0.0772873	0.582356	0.077422	0.574185	0.0753485
1st Symbol-row	1			0.541929	0.0705512	0.57258	0.0738738	0.603841	0.0772067	0.635722	0.0805499	0.668238	0.0839035	0.590653	0.0758467	0.590653	0.0757106	0.590653	0.0759828			0.558817	0.0749229	0.56768	0.0752587	0.562655	0.0768373	0.571168	0.0764108	0.575527	0.0765464	0.57084	0.0748152
				0.542233	0.0705436	0.572904	0.0738658	0.604185	0.0771983	0.636089	0.0805411	0.668626	0.0838944	0.595823	0.0763968	0.595823	0.0762596	0.595823	0.0765339			0.55274	0.0740609	0.561595	0.0744029	0.555846	0.0759557	0.564674	0.0755369	0.569234	0.0756803	0.568146	0.0743249
				0.54255	0.0705436	0.573242	0.0738658	0.604545	0.0771983	0.63647	0.0805411	0.669031	0.0838944	0.60101	0.0769471	0.60101	0.076809	0.60101	0.0770853			0.547299	0.0732327	0.556146	0.0735818	0.549751	0.0750834	0.55886	0.0746827	0.563599	0.0748405	0.566174	0.073891
				0.542853	0.0705512	0.573566	0.0738738	0.604889	0.0772067	0.636837	0.0805499	0.66942	0.0839035	0.606215	0.0774978	0.606215	0.0773586	0.606215	0.077637			0.542599	0.0724546	0.55144	0.0728113	0.544487	0.0742373	0.553838	0.073865	0.558733	0.0740433	0.56498	0.0735252
				0.54312	0.070566	0.57385	0.0738893	0.605192	0.0772229	0.637158	0.0805668	0.66976	0.0839212	0.611436	0.0780487	0.611436	0.0779085	0.611436	0.0781889			0.538733	0.0717417	0.547567	0.0721064	0.540156	0.0734339	0.549707	0.0730994	0.554729	0.0733043	0.564595	0.0732375
				0.543327	0.0705865	0.574071	0.0739108	0.605427	0.0772455	0.637408	0.0805904	0.670025	0.0839458	0.616674	0.0785999	0.616674	0.0784587	0.616674	0.0787411			0.535775	0.0711078	0.544605	0.0714809	0.536844	0.0726889	0.546548	0.0724011	0.551667	0.0726379	0.565031	0.0730359
				0.543459	0.0706113	0.574211	0.0739368	0.605576	0.0772727	0.637566	0.0806188	0.670194	0.0839754	0.621929	0.0791514	0.621929	0.0790091	0.621929	0.0792937			0.533783	0.0705653	0.542609	0.0709468	0.534614	0.0720167	0.54442	0.0717835	0.549605	0.072057	0.566275	0.0729258
				0.543504	0.0706383	0.574259	0.0739651	0.605627	0.0773023	0.637621	0.0806498	0.670251	0.0840077	0.627201	0.0797032	0.627201	0.0795599	0.627201	0.0798464			0.532795	0.0701247	0.541619	0.0705147	0.53351	0.0714304	0.543367	0.0712587	0.548584	0.071573	0.568294	0.0729101
				ConcTikEll	ConcTikEll	ConcTikEll	ConcTikEll	ConcTikEll	ConcTikEll	ConcTikEll	ConcTikEll	ConcTikEll	ConcTikEll	0.63249	0.0802552	0.63249	0.0801109	0.63249	0.0803995			0.532832	0.0697946	0.541655	0.0701928	0.533553	0.0709415	0.543408	0.0708369	0.548623	0.0711952	0.571032	0.0729895
														0.637797	0.0808076	0.637797	0.0806622	0.637797	0.0809529			0.533892	0.0695814	0.542715	0.0699876	0.534744	0.0705594	0.544543	0.0705263	0.549722	0.070931	0.574415	0.0731615
														0.643121	0.0813602	0.643121	0.0812138	0.643121	0.0815065			0.535954	0.0694893	0.544779	0.0699029	0.537057	0.0702916	0.54675	0.070333	0.551859	0.0707856	0.57835	0.0734217
														0.648462	0.0819131	0.648462	0.0817657	0.648462	0.0820605			0.538979	0.0695201	0.547807	0.0699404	0.540449	0.0701433	0.549985	0.0702606	0.554993	0.0707618	0.58273	0.0737628
														0.65382	0.0824663	0.65382	0.0823178	0.65382	0.0826147			0.542908	0.0696732	0.55174	0.0700994	0.544853	0.0701173	0.554186	0.0703107	0.559063	0.07086	0.587435	0.0741756
														0.659196	0.0830197	0.659196	0.0828703	0.659196	0.0831692			0.547664	0.0699456	0.556501	0.0703768	0.550184	0.0702143	0.559271	0.0704823	0.563989	0.0710784	0.592338	0.0746488
														0.664589	0.0835735	0.664589	0.083423	0.664589	0.083724			0.553155	0.070332	0.561997	0.0707672	0.556338	0.0704323	0.565141	0.070772	0.569676	0.0714127	0.597305	0.0751695
														0.67	0.0841275	0.67	0.083976	0.67	0.084279			0.559273	0.0708248	0.568122	0.071263	0.563195	0.070767	0.571681	0.0711741	0.576013	0.0718563	0.602199	0.0757235
														0.67	0.0841275	0.67	0.083976	0.67	0.084279			0.565899	0.0714145	0.574757	0.0718546	0.570621	0.071212	0.578765	0.0716809	0.582877	0.0724007	0.606888	0.0762957
														IsoLine	IsoLine	ConcBand	ConcBand	ConcBand	ConcBand			0.572906	0.0720897	0.581771	0.0725304	0.578473	0.0717586	0.586254	0.0722824	0.590134	0.0730352	0.611244	0.0768705
																						0.580156	0.0728371	0.58903	0.0732772	0.586597	0.0723961	0.594003	0.072967	0.597642	0.0737475	0.615148	0.0774322
																						0.587508	0.0736422	0.596391	0.0740807	0.594835	0.0731122	0.601861	0.0737214	0.605256	0.0745238	0.618492	0.0779655
																						0.594819	0.0744893	0.603711	0.074925	0.603027	0.0738928	0.609675	0.0745309	0.612828	0.0753489	0.621187	0.0784558
																						0.601946	0.075362	0.610848	0.0757937	0.611013	0.0747229	0.617293	0.0753796	0.62021	0.0762068	0.623159	0.0788897
																						0.608752	0.0762433	0.617662	0.0766701	0.618638	0.0755862	0.624566	0.0762512	0.627258	0.0770807	0.624353	0.0792555
																						0.615103	0.077116	0.624022	0.0775369	0.625754	0.076466	0.631354	0.0771285	0.633835	0.0779537	0.624737	0.0795431
																						0.620877	0.0779632	0.629803	0.0783774	0.632221	0.0773451	0.637523	0.0779946	0.639813	0.0788087
																						0.62596	0.0787682	0.634893	0.0791752	0.637915	0.0782064	0.642954	0.0788327	0.645077	0.0796292
																						0.630253	0.0795156	0.639193	0.0799147	0.642724	0.0790331	0.647542	0.0796262	0.649522	0.0803992
																						0.633674	0.0801906	0.642619	0.0805815	0.646555	0.0798092	0.651196	0.08036	0.653064	0.0811036
																						0.636155	0.0807803	0.645104	0.0811627	0.649333	0.0805196	0.653846	0.0810195	0.655632	0.0817288
																						0.637648	0.0812731	0.6466	0.081647	0.651004	0.0811504	0.65544	0.0815921	0.657178	0.0822625
																						0.638125	0.0816594	0.647078	0.0820249	0.651535	0.0816893	0.655947	0.0820666	0.65767	0.0826945
																						Black	Black	Black	Black	Black	Black	Black	Black	Black	Black

## Sheet: PlotDat9
Source sheet	all data	0.604147	0.0775163	0.543504	0.0706383	0.574259	0.0739651	0.605627	0.0773023	0.637621	0.0806498	0.670251	0.0840077	0.703532	0.087376	0.52	0.068175	0.52	0.0680531	0.52	0.0682969	0.512308	0.0673218	0.659419	0.0837006	0.662342	0.0838141	0.677862	0.0846905	0.670684	0.08482	0.696414	0.0862523	0.679696	0.0863194	0.645907	0.0819323
Plot name	Concordia5	0.607875	0.0777	0.543459	0.0706652	0.574211	0.0739934	0.605576	0.0773318	0.637566	0.0806807	0.670194	0.08404	0.703471	0.0874097	0.52	0.068175	0.52	0.0680531	0.52	0.0682969	0.542391	0.0706383	0.658845	0.0839677	0.661777	0.0840693	0.677251	0.0850343	0.670108	0.0851331	0.695817	0.0865586	0.678933	0.0865746	0.645504	0.0820923
Plot Type	1	0.619306	0.0786582	0.543327	0.07069	0.574071	0.0740194	0.605427	0.077359	0.637408	0.0807091	0.670025	0.0840696	0.703293	0.0874405	0.526493	0.0688924	0.526493	0.0687692	0.526493	0.0690157	0.573073	0.0739651	0.657206	0.0841093	0.660162	0.0842004	0.675512	0.0852541	0.668468	0.0853261	0.694114	0.086741	0.676741	0.0866565	0.644349	0.082164
1st free col	39	0.615497	0.078964	0.54312	0.0707106	0.57385	0.0740409	0.605192	0.0773816	0.637158	0.0807327	0.66976	0.0840942	0.703012	0.0874662	0.533014	0.0696103	0.533014	0.0694858	0.533014	0.0697349	0.604365	0.0773023	0.654534	0.0841226	0.65753	0.0842051	0.672679	0.0853454	0.665798	0.0853953	0.691338	0.0867961	0.67318	0.0865628	0.642473	0.0821457
Sigma Level	2	0.638996	0.0801981	0.542853	0.0707253	0.573566	0.0740564	0.604889	0.0773978	0.636837	0.0807496	0.66942	0.0841119	0.702651	0.0874846	0.539562	0.0703287	0.539562	0.0702028	0.539562	0.0704546	0.636279	0.0806498	0.650881	0.0840073	0.653931	0.0840831	0.668807	0.0853066	0.662149	0.0853394	0.687543	0.0867228	0.668348	0.0862961	0.639929	0.0820377
Absolute Errs	FALSE	0.626566	0.0802203	0.54255	0.070733	0.573242	0.0740644	0.604545	0.0774062	0.63647	0.0807584	0.669031	0.084121	0.70224	0.0874941	0.546139	0.0710476	0.546139	0.0709204	0.546139	0.0711748	0.668829	0.0840077	0.646319	0.0837656	0.649436	0.0838369	0.663971	0.0851384	0.657591	0.0851593	0.682803	0.0865225	0.662376	0.0858637	0.636784	0.081843
Symbol Type	1	IsoLine	IsoLine	0.542233	0.070733	0.572904	0.0740644	0.604185	0.0774062	0.636089	0.0807584	0.668626	0.084121	0.701811	0.0874941	0.552743	0.0717669	0.552743	0.0716384	0.552743	0.0718955	0.702025	0.087376	0.640936	0.0834023	0.644132	0.0834712	0.658266	0.0848441	0.652215	0.0848586	0.677211	0.0861991	0.655428	0.0852773	0.633126	0.081567
Inverse Plot	FALSE			0.541929	0.0707253	0.57258	0.0740564	0.603841	0.0773978	0.635722	0.0807496	0.668238	0.0841119	0.7014	0.0874846	0.559376	0.0724867	0.559376	0.0723569	0.559376	0.0726166	IsoLine	IsoLine	0.634837	0.0829245	0.638123	0.0829932	0.651803	0.0844293	0.646123	0.0844432	0.670875	0.0857588	0.647692	0.084553	0.629054	0.0812172
Color Plot	FALSE			0.541663	0.0707106	0.572296	0.0740409	0.603538	0.0773816	0.635401	0.0807327	0.667897	0.0840942	0.701039	0.0874662	0.566037	0.073207	0.566037	0.0730758	0.566037	0.0733383			0.62814	0.0823414	0.631524	0.0824122	0.644707	0.0839022	0.639436	0.0839212	0.663918	0.0852104	0.63938	0.0837105	0.624679	0.080803
3D plot	FALSE			0.541455	0.07069	0.572075	0.0740194	0.603303	0.077359	0.635151	0.0807091	0.667632	0.0840696	0.700758	0.0874405	0.572726	0.0739278	0.572726	0.0737953	0.572726	0.0740604			0.620977	0.0816643	0.624465	0.0817395	0.637117	0.0832731	0.632283	0.0833027	0.656476	0.0845644	0.630718	0.0827728	0.62012	0.0803359
Linear	FALSE			0.541324	0.0706652	0.571935	0.0739934	0.603154	0.0773318	0.634993	0.0806807	0.667464	0.08404	0.70058	0.0874097	0.579445	0.0746491	0.579445	0.0745152	0.579445	0.074783			0.613486	0.0809066	0.617084	0.0809881	0.629181	0.0825541	0.624803	0.0825997	0.648694	0.0838334	0.621943	0.0817654	0.615502	0.0798285
Data Range	AC31:AG38			0.541279	0.0706383	0.571887	0.0739651	0.603103	0.0773023	0.634938	0.0806498	0.667406	0.0840077	0.700519	0.087376	0.586191	0.0753709	0.586191	0.0752357	0.586191	0.0755061			0.605813	0.0800828	0.609523	0.0801727	0.621052	0.0817593	0.617141	0.081826	0.640723	0.0830316	0.613294	0.080716	0.610951	0.0792947
Filled Symbols	FALSE			0.541324	0.0706113	0.571935	0.0739368	0.603154	0.0772727	0.634993	0.0806188	0.667464	0.0839754	0.70058	0.0873424	0.592967	0.0760931	0.592967	0.0759566	0.592967	0.0762297			0.598108	0.0792091	0.60193	0.0793092	0.612889	0.0809042	0.609448	0.0809965	0.632719	0.0821747	0.605008	0.079653	0.60659	0.0787491
ConcAge	TRUE			0.541455	0.0705865	0.572075	0.0739108	0.603303	0.0772455	0.635151	0.0805904	0.667632	0.0839458	0.700758	0.0873116	0.599772	0.0768159	0.599772	0.0766779	0.599772	0.0769538			0.590521	0.0783024	0.594453	0.0784144	0.604851	0.0800053	0.601873	0.0801275	0.624837	0.0812793	0.597309	0.0786054	0.602539	0.0782064
ConcSwap	FALSE			0.541663	0.070566	0.572296	0.0738893	0.603538	0.0772229	0.635401	0.0805668	0.667897	0.0839212	0.701039	0.0872859	0.606605	0.0775391	0.606605	0.0773998	0.606605	0.0776783			0.583198	0.0773805	0.587237	0.0775057	0.597094	0.0790802	0.594563	0.0792359	0.61723	0.0803629	0.590408	0.0776019	0.598909	0.0776817
1st Symbol-row	1			0.541929	0.0705512	0.57258	0.0738738	0.603841	0.0772067	0.635722	0.0805499	0.668238	0.0839035	0.7014	0.0872675	0.613468	0.0782628	0.613468	0.0781222	0.613468	0.0784034			0.576284	0.0764611	0.580422	0.0766008	0.589769	0.0781469	0.58766	0.0783389	0.610047	0.0794433	0.584494	0.0766699	0.595797	0.077189
				0.542233	0.0705436	0.572904	0.0738658	0.604185	0.0771983	0.636089	0.0805411	0.668626	0.0838944	0.701811	0.087258	0.62036	0.078987	0.62036	0.078845	0.62036	0.0791289			0.569911	0.0755623	0.574142	0.0757172	0.58302	0.0772236	0.581299	0.0774541	0.603427	0.0785384	0.579727	0.0758347	0.59329	0.076742
				0.54255	0.0705436	0.573242	0.0738658	0.604545	0.0771983	0.63647	0.0805411	0.669031	0.0838944	0.70224	0.087258	0.627282	0.0797116	0.627282	0.0795683	0.627282	0.0798549			0.564206	0.0747016	0.568519	0.0748723	0.576977	0.0763281	0.575604	0.0765987	0.5975	0.0776657	0.576238	0.0751191	0.591455	0.0763527
				0.542853	0.0705512	0.573566	0.0738738	0.604889	0.0772067	0.636837	0.0805499	0.66942	0.0839035	0.702651	0.0872675	0.634233	0.0804368	0.634233	0.0802922	0.634233	0.0805814			0.559277	0.0738956	0.563662	0.0740824	0.571757	0.0754781	0.570685	0.0757894	0.592381	0.0768424	0.574121	0.0745426	0.590343	0.0760318
				0.54312	0.070566	0.57385	0.0738893	0.605192	0.0772229	0.637158	0.0805668	0.66976	0.0839212	0.703012	0.0872859	0.641214	0.0811624	0.641214	0.0810164	0.641214	0.0813084			0.555222	0.0731601	0.559665	0.0733629	0.567463	0.0746899	0.566638	0.0750418	0.588168	0.0760844	0.573436	0.0741211	0.589984	0.0757881
				0.543327	0.0705865	0.574071	0.0739108	0.605427	0.0772455	0.637408	0.0805904	0.670025	0.0839458	0.703293	0.0873116	0.648225	0.0818886	0.648225	0.0817412	0.648225	0.0820359			0.552119	0.0725094	0.556607	0.0727278	0.564179	0.0739789	0.563543	0.0743706	0.584945	0.0754064	0.574199	0.0738659	0.590388	0.0756282
				0.543459	0.0706113	0.574211	0.0739368	0.605576	0.0772727	0.637566	0.0806188	0.670194	0.0839754	0.703471	0.0873424	0.655265	0.0826152	0.655265	0.0824665	0.655265	0.0827639			0.550029	0.0719562	0.554546	0.0721895	0.561967	0.0733591	0.561458	0.0737888	0.582774	0.0748217	0.576391	0.073784	0.591543	0.0755564
				0.543504	0.0706383	0.574259	0.0739651	0.605627	0.0773023	0.637621	0.0806498	0.670251	0.0840077	0.703532	0.087376	0.662336	0.0833423	0.662336	0.0831923	0.662336	0.0834924			0.548992	0.0715111	0.553524	0.0717584	0.560871	0.0728424	0.560426	0.0733077	0.581698	0.0743417	0.579952	0.0738777	0.593418	0.0755748
				ConcTikEll	ConcTikEll	ConcTikEll	ConcTikEll	ConcTikEll	ConcTikEll	ConcTikEll	ConcTikEll	ConcTikEll	ConcTikEll	ConcTikEll	ConcTikEll	0.669437	0.0840699	0.669437	0.0839185	0.669437	0.0842214			0.549029	0.071183	0.553559	0.071443	0.560913	0.0724388	0.560465	0.0729367	0.581736	0.0739756	0.584784	0.0741444	0.595963	0.0756828
																0.676568	0.084798	0.676568	0.0846452	0.676568	0.0849508			0.550138	0.0709781	0.554652	0.0712494	0.562091	0.0721564	0.561575	0.072683	0.58289	0.0737307	0.590755	0.0745769	0.599107	0.0758774
																0.68373	0.0855266	0.68373	0.0853724	0.68373	0.0856807			0.552299	0.0709005	0.55678	0.0711813	0.564382	0.0720004	0.563736	0.0725516	0.585135	0.0736116	0.597704	0.0751632	0.602765	0.0761534
																0.690922	0.0862557	0.690922	0.0861001	0.690922	0.0864112			0.555469	0.0709516	0.559903	0.0712401	0.567743	0.0719741	0.566903	0.0725449	0.588428	0.0736207	0.60544	0.0758875	0.606837	0.0765033
																0.698145	0.0869852	0.698145	0.0868283	0.698145	0.0871421			0.559586	0.0711305	0.56396	0.0714247	0.572108	0.0720779	0.571016	0.0726633	0.592706	0.0737579	0.613752	0.07673	0.611212	0.0769174
																0.705399	0.0877153	0.705399	0.087557	0.705399	0.0878735			0.564571	0.0714337	0.568872	0.0717314	0.577391	0.0723097	0.575996	0.0729042	0.597885	0.0740204	0.622414	0.0776678	0.615771	0.0773846
																0.712684	0.0884458	0.712684	0.0882862	0.712684	0.0886054			0.570326	0.0718553	0.574542	0.0721542	0.58349	0.0726651	0.581744	0.0732631	0.603863	0.0744032	0.631189	0.0786751	0.620389	0.0778919
																0.72	0.0891768	0.72	0.0890158	0.72	0.0893378			0.57674	0.0723871	0.580862	0.072685	0.590285	0.0731372	0.588149	0.073733	0.610526	0.0748987	0.639837	0.0797246	0.62494	0.0784257
																0.72	0.0891768	0.72	0.0890158	0.72	0.0893378			0.583686	0.0730187	0.587707	0.0733135	0.597646	0.0737167	0.595086	0.0743046	0.617743	0.0754974	0.648124	0.0807876	0.629301	0.0789714
																IsoLine	IsoLine	ConcBand	ConcBand	ConcBand	ConcBand			0.591031	0.0737379	0.594945	0.0740272	0.605429	0.0743924	0.60242	0.074967	0.625373	0.0761876	0.655823	0.0818351	0.633352	0.079514
																								0.598632	0.0745306	0.602435	0.0748125	0.613481	0.0751511	0.61001	0.0757072	0.633269	0.0769558	0.662724	0.0828386	0.636983	0.0800388
																								0.606339	0.0753814	0.61003	0.075654	0.621647	0.0759781	0.617705	0.0765107	0.641276	0.0777872	0.668638	0.0837706	0.640094	0.0805314
																								0.614004	0.0762738	0.617583	0.0765353	0.629767	0.0768573	0.625358	0.077362	0.649239	0.0786654	0.673405	0.0846059	0.642601	0.0809785
																								0.621478	0.0771903	0.624948	0.0774393	0.637684	0.0777715	0.632819	0.0782445	0.657002	0.0795736	0.676894	0.0853214	0.644436	0.0813677
																								0.628614	0.0781132	0.63198	0.0783483	0.645243	0.0787029	0.639943	0.079141	0.664415	0.0804938	0.67901	0.0858979	0.645548	0.0816886
																								0.635273	0.0790245	0.638543	0.0792447	0.652297	0.0796335	0.646591	0.080034	0.671333	0.0814083	0.679696	0.0863194	0.645907	0.0819323
																								0.641327	0.0799064	0.644509	0.0801111	0.658709	0.0805452	0.652634	0.0809062	0.677622	0.0822993	Black	Black
																								0.646657	0.0807418	0.649763	0.0809305	0.664354	0.08142	0.657954	0.0817406	0.683159	0.0831493
																								0.65116	0.0815144	0.6542	0.0816871	0.669122	0.0822412	0.662448	0.082521	0.687836	0.083942
																								0.654748	0.0822092	0.657737	0.082366	0.672921	0.0829926	0.666028	0.0832321	0.691563	0.0846617
																								0.657351	0.0828126	0.660302	0.0829541	0.675676	0.0836596	0.668624	0.0838602	0.694266	0.0852946
																								0.658918	0.083313	0.661848	0.08344	0.677334	0.0842293	0.670186	0.0843929	0.695894	0.0858282
																								0.659419	0.0837006	0.662342	0.0838141	0.677862	0.0846905	0.670684	0.08482	0.696414	0.0862523
																								Black	Black	Black	Black	Black	Black	Black	Black	Black	Black

[truncated: 1 more sheets: data table]
