# Supplementary material for: A tectonic carpet of Variscan flysch at the base of a rootless accretionary prism in northwestern Iberia: U–Pb zircon age constrains from sediments and volcanic olistoliths
Source: Copernicus journal article supplement (doi:10.5194/se-12-835-2021), 2021-04-15
Supplement: Supplementary file 5 [file se-12-835-2021-supplement.zip › SUPP TABLES/Supplementary Table 16_PET1.xls]

## Sheet: PlotDat0
Source sheet	Hoja1	0.619018	0.0782477	0.589866	0.0756324	0.605627	0.0773023	0.621545	0.0789747	0.637621	0.0806498	0.653855	0.0823274	0.670251	0.0840077	0.582722	0.075	0.583983	0.075	0.581467	0.075	0.588642	0.0756324	0.644574	0.0791295	0.642337	0.0792803	0.654649	0.0791853	0.651123	0.0790805	0.640422	0.0792035	0.649218	0.0793466	0.646031	0.0794627	0.663109	0.07938	0.641587	0.0800836	0.652961	0.0797754	0.644152	0.0797176	0.653642	0.0798291	0.653762	0.079443
Plot name	Concordia0	0.623639	0.07845	0.589816	0.0756613	0.605576	0.0773318	0.621492	0.079005	0.637566	0.0806807	0.653799	0.082359	0.670194	0.08404	0.582722	0.075	0.585933	0.0752081	0.582722	0.0751345	0.604365	0.0773023	0.644319	0.0793207	0.642148	0.0794282	0.654323	0.0793912	0.650877	0.0792397	0.640231	0.0793468	0.649008	0.0794973	0.645763	0.0796373	0.662697	0.0795905	0.641331	0.0802875	0.652728	0.0799488	0.643946	0.0798703	0.653327	0.0800433	0.653427	0.0795977
Plot Type	1	0.621628	0.0785194	0.589672	0.0756879	0.605427	0.077359	0.621338	0.0790328	0.637408	0.0807091	0.653636	0.0823881	0.670025	0.0840696	0.585933	0.0753433	0.589151	0.0755509	0.585933	0.0754785	0.620244	0.0789747	0.643571	0.0794911	0.641599	0.0795571	0.653361	0.0795801	0.650151	0.0793853	0.639672	0.0794743	0.64839	0.0796328	0.644973	0.0797971	0.661475	0.0797873	0.640587	0.0804651	0.652045	0.0801032	0.643342	0.0800069	0.652401	0.0802381	0.652434	0.0797388
1st free col	111	0.626206	0.0785381	0.589443	0.07571	0.605192	0.0773816	0.621096	0.0790559	0.637158	0.0807327	0.653379	0.0824122	0.66976	0.0840942	0.589151	0.0756867	0.592376	0.0758937	0.589151	0.0758225	0.636279	0.0806498	0.642345	0.0796373	0.6407	0.0796644	0.651781	0.0797484	0.648958	0.0795144	0.638756	0.0795836	0.647376	0.0797504	0.643676	0.079939	0.659466	0.0799666	0.63937	0.080613	0.650927	0.0802357	0.642352	0.0801246	0.650882	0.0804096	0.650811	0.0798624
Sigma Level	2	0.621332	0.0785388	0.58915	0.0757258	0.604889	0.0773978	0.620784	0.0790724	0.636837	0.0807496	0.653048	0.0824294	0.66942	0.0841119	0.592376	0.0760302	0.595607	0.0762367	0.592376	0.0761666	0.652474	0.0823274	0.640665	0.0797565	0.639469	0.0797481	0.649615	0.0798927	0.647323	0.0796244	0.637501	0.0796726	0.645986	0.0798479	0.641897	0.0800602	0.65671	0.0801248	0.637704	0.0807283	0.649394	0.0803435	0.640996	0.0802211	0.648799	0.0805545	0.648602	0.0799651
Absolute Errs	FALSE	0.628066	0.0787151	0.588816	0.075734	0.604545	0.0774062	0.620429	0.079081	0.63647	0.0807584	0.652671	0.0824384	0.669031	0.084121	0.595607	0.0763738	0.598845	0.0765798	0.595607	0.0765109	0.668829	0.0840077	0.638563	0.0798462	0.63793	0.0798065	0.646903	0.0800103	0.645277	0.0797134	0.635932	0.0797395	0.644248	0.0799234	0.639671	0.0801583	0.65326	0.0802589	0.635621	0.0808088	0.647477	0.0804247	0.639299	0.0802945	0.646192	0.0806701	0.645868	0.0800442
Symbol Type	1	0.618925	0.0788753	0.588468	0.075734	0.604185	0.0774062	0.620058	0.079081	0.636089	0.0807584	0.652277	0.0824384	0.668626	0.084121	0.598845	0.0767175	0.602089	0.076923	0.598845	0.0768553	IsoLine	IsoLine	0.636082	0.0799049	0.636113	0.0798386	0.6437	0.0800989	0.642859	0.0797794	0.634078	0.079783	0.642195	0.0799753	0.637042	0.0802314	0.649183	0.0803662	0.633161	0.0808529	0.645213	0.0804776	0.637296	0.0803435	0.643113	0.080754	0.642682	0.0800976
Inverse Plot	FALSE	0.62106	0.0788851	0.588133	0.0757258	0.603841	0.0773978	0.619703	0.0790724	0.635722	0.0807496	0.6519	0.0824294	0.668238	0.0841119	0.602089	0.0770614	0.60534	0.0772663	0.602089	0.0771997			0.633268	0.0799313	0.634053	0.0798436	0.640067	0.0801568	0.640118	0.0798213	0.631976	0.0798023	0.639866	0.0800027	0.634059	0.0802781	0.644558	0.0804447	0.630373	0.0808598	0.642646	0.0805012	0.635024	0.080367	0.639621	0.0808047	0.639132	0.0801236
Color Plot	TRUE	0.616278	0.078939	0.58784	0.07571	0.603538	0.0773816	0.619391	0.0790559	0.635401	0.0807327	0.651569	0.0824122	0.667897	0.0840942	0.60534	0.0774053	0.608597	0.0776097	0.60534	0.0775443			0.630176	0.0799249	0.631791	0.0798215	0.636076	0.0801827	0.637106	0.0798382	0.629667	0.079797	0.637308	0.080005	0.630782	0.0802975	0.639477	0.0804929	0.62731	0.0808293	0.639825	0.0804951	0.632527	0.0803647	0.635785	0.0808211	0.635315	0.0801217
3D plot	FALSE	0.629644	0.0789731	0.587612	0.0756879	0.603303	0.077359	0.619149	0.0790328	0.635151	0.0807091	0.651312	0.0823881	0.667632	0.0840696	0.608597	0.0777494	0.611861	0.0779533	0.608597	0.077889			0.626868	0.0798859	0.62937	0.0797726	0.631803	0.0801763	0.633881	0.0798298	0.627195	0.0797673	0.63457	0.0799822	0.627275	0.0802893	0.634036	0.0805098	0.624033	0.0807619	0.636807	0.0804594	0.629856	0.0803365	0.631678	0.080803	0.631335	0.0800919
Linear	FALSE	0.623515	0.0790366	0.587468	0.0756613	0.603154	0.0773318	0.618995	0.079005	0.634993	0.0806807	0.651148	0.082359	0.667464	0.08404	0.611861	0.0780935	0.615132	0.0782969	0.611861	0.0782338			0.623407	0.079815	0.626837	0.0796981	0.627332	0.0801377	0.630507	0.0797963	0.62461	0.0797136	0.631706	0.0799348	0.623604	0.0802535	0.628344	0.080495	0.620604	0.0806591	0.633649	0.0803947	0.627061	0.0802829	0.627381	0.0807506	0.6273	0.080035
Data Range	H16:L57	0.62191	0.0790449	0.587418	0.0756324	0.603103	0.0773023	0.618942	0.0789747	0.634938	0.0806498	0.651092	0.0823274	0.667406	0.0840077	0.615132	0.0784378	0.618409	0.0786406	0.615132	0.0785787			0.61986	0.0797136	0.624242	0.0795992	0.62275	0.0800675	0.627049	0.0797383	0.62196	0.079637	0.62877	0.0798636	0.619843	0.0801909	0.622509	0.0804489	0.617092	0.0805228	0.630413	0.0803024	0.624197	0.0802052	0.622978	0.080665	0.623321	0.0799526
Filled Symbols	FALSE	0.629331	0.0790985	0.587468	0.0756034	0.603154	0.0772727	0.618995	0.0789445	0.634993	0.0806188	0.651148	0.0822958	0.667464	0.0839754	0.618409	0.0787822	0.621693	0.0789845	0.618409	0.0789238			0.616297	0.0795837	0.621635	0.079478	0.618146	0.0799672	0.623575	0.0796569	0.619299	0.0795391	0.625821	0.0797701	0.616064	0.0801027	0.616646	0.0803724	0.613563	0.0803557	0.627163	0.0801842	0.62132	0.0801047	0.618553	0.0805479	0.619505	0.0798468
ConcAge	TRUE	0.629857	0.079219	0.587612	0.0755769	0.603303	0.0772455	0.619149	0.0789166	0.635151	0.0805904	0.651312	0.0822668	0.667632	0.0839458	0.621693	0.0791267	0.624984	0.0793285	0.621693	0.0792689			0.612787	0.0794277	0.619067	0.0793368	0.61361	0.0798388	0.620153	0.0795538	0.616677	0.0794217	0.622916	0.079656	0.612341	0.0799906	0.610869	0.0802669	0.610088	0.0801611	0.62396	0.0800424	0.618486	0.0799833	0.614195	0.0804016	0.615957	0.0797207
ConcSwap	FALSE	0.626771	0.0792301	0.58784	0.0755548	0.603538	0.0772229	0.619391	0.0788935	0.635401	0.0805668	0.651569	0.0822427	0.667897	0.0839212	0.624984	0.0794713	0.628281	0.0796725	0.624984	0.0796142			0.609398	0.0792488	0.616589	0.0791783	0.60923	0.0796846	0.616848	0.0794308	0.614146	0.0792872	0.62011	0.0795236	0.608745	0.0798568	0.605291	0.0801345	0.606733	0.0799426	0.620868	0.0798798	0.615749	0.0798436	0.609986	0.0802288	0.612775	0.0795776
1st Symbol-row	1	0.624829	0.0792755	0.588133	0.075539	0.603841	0.0772067	0.619703	0.078877	0.635722	0.0805499	0.6519	0.0822254	0.668238	0.0839035	0.628281	0.079816	0.631585	0.0800167	0.628281	0.0799595			0.606196	0.0790504	0.614247	0.0790056	0.605091	0.0795078	0.613725	0.0792905	0.611754	0.079138	0.61746	0.0793755	0.605348	0.0797039	0.600019	0.0799778	0.603564	0.0797046	0.617947	0.0796996	0.613164	0.0796882	0.606009	0.080033	0.610043	0.0794214
		0.625908	0.0792759	0.588468	0.0755307	0.604185	0.0771983	0.620058	0.0788684	0.636089	0.0805411	0.652277	0.0822164	0.668626	0.0838944	0.631585	0.0801609	0.634896	0.080361	0.631585	0.080305			0.603244	0.0788364	0.612088	0.0788222	0.601274	0.0793117	0.610845	0.0791356	0.609549	0.0789772	0.615016	0.0792145	0.602215	0.0795348	0.595157	0.0797998	0.600642	0.0794517	0.615254	0.0795052	0.61078	0.0795201	0.602342	0.0798179	0.607838	0.0792564
		0.619055	0.0794024	0.588816	0.0755307	0.604545	0.0771983	0.620429	0.0788684	0.63647	0.0805411	0.652671	0.0822164	0.669031	0.0838944	0.634896	0.0805058	0.638213	0.0807054	0.634896	0.0806506			0.600599	0.078611	0.610155	0.0786315	0.597853	0.0791002	0.608264	0.078969	0.607573	0.0788079	0.612826	0.0790438	0.599408	0.0793529	0.590799	0.0796041	0.598024	0.0791888	0.612841	0.0793005	0.608644	0.0793425	0.599056	0.0795879	0.60622	0.0790871
		0.625233	0.0795684	0.58915	0.075539	0.604889	0.0772067	0.620784	0.078877	0.636837	0.0805499	0.653048	0.0822254	0.66942	0.0839035	0.638213	0.0808508	0.641537	0.0810499	0.638213	0.0809963			0.598312	0.0783784	0.608483	0.0784372	0.594896	0.0788775	0.606032	0.0787941	0.605865	0.0786333	0.610933	0.0788667	0.59698	0.0791618	0.58703	0.0793943	0.595762	0.078921	0.610754	0.0790894	0.606797	0.079159	0.596215	0.0793472	0.605231	0.0789181
		0.630282	0.0795902	0.589443	0.0755548	0.605192	0.0772229	0.621096	0.0788935	0.637158	0.0805668	0.653379	0.0822427	0.66976	0.0839212	0.641537	0.081196	0.644868	0.0813946	0.641537	0.0813421			0.596429	0.0781433	0.607107	0.0782432	0.592458	0.0786477	0.604193	0.0786141	0.604458	0.0784569	0.609373	0.0786867	0.594979	0.078965	0.583924	0.0791746	0.5939	0.0786536	0.609036	0.078876	0.605276	0.0789732	0.593873	0.0791007	0.6049	0.078754
		0.632145	0.0796386	0.589672	0.0755769	0.605427	0.0772455	0.621338	0.0789166	0.637408	0.0805904	0.653636	0.0822668	0.670025	0.0839458	0.644868	0.0815413	0.648206	0.0817393	0.644868	0.081688			0.594985	0.0779103	0.606052	0.0780532	0.590588	0.0784154	0.602782	0.0784327	0.60338	0.0782821	0.608177	0.0785072	0.593445	0.0787665	0.58154	0.0789493	0.592472	0.0783918	0.607718	0.0786645	0.60411	0.0787885	0.592078	0.078853	0.605236	0.0785993
		0.624767	0.0796921	0.589816	0.0756034	0.605576	0.0772727	0.621492	0.0789445	0.637566	0.0806188	0.653799	0.0822958	0.670194	0.0839754	0.648206	0.0818866	0.65155	0.0820841	0.648206	0.082034			0.594009	0.0776838	0.60534	0.077871	0.589322	0.0781852	0.601827	0.0782534	0.602651	0.0781123	0.607368	0.0783318	0.592406	0.0785701	0.579925	0.0787227	0.591508	0.0781406	0.606828	0.0784591	0.603321	0.0786087	0.590863	0.0786091	0.606228	0.0784583
		0.623625	0.079765	0.589866	0.0756324	0.605627	0.0773023	0.621545	0.0789747	0.637621	0.0806498	0.653855	0.0823274	0.670251	0.0840077	0.65155	0.0822321	0.654902	0.0824291	0.65155	0.0823801			0.593519	0.0774683	0.604984	0.0777	0.588686	0.0779614	0.601347	0.0780795	0.602285	0.0779507	0.606962	0.0781638	0.591884	0.0783797	0.579112	0.0784993	0.591027	0.0779049	0.606381	0.0782636	0.602926	0.0784373	0.590252	0.0783737	0.607851	0.0783347
		0.628156	0.0797889	ConcTikEll	ConcTikEll	ConcTikEll	ConcTikEll	ConcTikEll	ConcTikEll	ConcTikEll	ConcTikEll	ConcTikEll	ConcTikEll	ConcTikEll	ConcTikEll	0.654902	0.0825777	0.65826	0.0827741	0.654902	0.0827264			0.593526	0.0772679	0.604991	0.0775436	0.58869	0.0777486	0.601351	0.0779146	0.60229	0.0778007	0.606967	0.0780065	0.591888	0.0781989	0.579114	0.0782834	0.591036	0.0776894	0.606387	0.078082	0.602931	0.0782775	0.590258	0.0781514	0.61006	0.0782319
		0.628248	0.0797936													0.65826	0.0829234	0.661624	0.0831193	0.65826	0.0830727			0.594029	0.0770867	0.60536	0.0774049	0.589335	0.0775507	0.601838	0.0777619	0.602666	0.077665	0.607382	0.077863	0.592418	0.0780312	0.579933	0.0780793	0.591538	0.0774982	0.606846	0.0779176	0.603337	0.0781324	0.590879	0.0779464	0.612795	0.0781528
		0.627327	0.0798306													0.661624	0.0832692	0.664996	0.0834646	0.661624	0.0834192			0.595019	0.076928	0.606086	0.0772865	0.590609	0.0773717	0.6028	0.0776242	0.603405	0.0775463	0.6082	0.0777362	0.593464	0.07788	0.581552	0.0778908	0.59252	0.0773351	0.607749	0.0777739	0.604135	0.078005	0.592105	0.0777629	0.61598	0.0780995
		0.620496	0.0798926													0.664996	0.0836152	0.668375	0.08381	0.664996	0.0837658			0.596475	0.076795	0.607153	0.0771907	0.592487	0.077215	0.604217	0.0775044	0.604493	0.0774469	0.609405	0.0776283	0.595006	0.0777482	0.583941	0.0777216	0.593965	0.0772031	0.609078	0.0776535	0.605311	0.0778976	0.59391	0.0776042	0.61953	0.0780734
		0.633005	0.0799559													0.668375	0.0839612	0.67176	0.0841555	0.668375	0.0841124			0.598371	0.0766903	0.608542	0.0771195	0.594932	0.0770837	0.606062	0.0774046	0.605909	0.0773688	0.610972	0.0775417	0.597013	0.0776383	0.587052	0.0775751	0.595844	0.077105	0.610807	0.0775587	0.606841	0.0778125	0.596261	0.0774737	0.623347	0.0780753
		0.636358	0.0799581													0.67176	0.0843074	0.675152	0.0845011	0.67176	0.0844592			0.600668	0.0766159	0.610224	0.0770741	0.597896	0.0769803	0.608299	0.0773269	0.607625	0.0773134	0.612873	0.0774778	0.599447	0.0775525	0.590825	0.0774541	0.598122	0.0770425	0.612903	0.0774915	0.608696	0.0777511	0.599111	0.0773737	0.627327	0.0781051
		0.637365	0.0800366													0.675152	0.0846536	0.678551	0.0848468	0.675152	0.0848062			0.603322	0.0765733	0.612167	0.0770556	0.601323	0.0769069	0.610885	0.0772728	0.609608	0.0772819	0.615069	0.0774381	0.602259	0.0774924	0.595186	0.077361	0.600752	0.077017	0.615324	0.0774532	0.610839	0.0777148	0.602404	0.0773062	0.631362	0.078162
		0.638786	0.0801112													0.678551	0.085	0.68006	0.085	0.677051	0.085			0.606282	0.0765632	0.614333	0.0770642	0.605144	0.0768649	0.613769	0.0772434	0.611819	0.0772749	0.617518	0.0774232	0.605397	0.0774592	0.600051	0.0772975	0.603685	0.0770288	0.618025	0.0774444	0.613229	0.0777042	0.606078	0.0772726	0.635342	0.0782445
		0.628081	0.0801276													0.678551	0.085	ConcBand	ConcBand	ConcBand	ConcBand			0.60949	0.076586	0.616681	0.0770997	0.609287	0.0768551	0.616895	0.0772391	0.614215	0.0772925	0.620173	0.0774334	0.608797	0.0774537	0.605325	0.0772649	0.606862	0.0770779	0.620951	0.0774653	0.615819	0.0777195	0.610059	0.0772734	0.639157	0.0783502
		0.626609	0.0801291													IsoLine	IsoLine							0.612883	0.0766411	0.619164	0.0771616	0.613669	0.0768777	0.620203	0.0772601	0.61675	0.0773343	0.622981	0.0774686	0.612395	0.0774757	0.610905	0.0772638	0.610223	0.0771631	0.624047	0.0775157	0.618559	0.0777605	0.614271	0.0773088	0.642705	0.0784764
		0.632076	0.0801368																					0.616395	0.0767274	0.621734	0.0772485	0.618207	0.0769322	0.623627	0.077306	0.619373	0.0773995	0.625888	0.0775281	0.61612	0.077525	0.616682	0.0772943	0.613702	0.077283	0.627252	0.0775943	0.621395	0.0778263	0.618632	0.0773779	0.645888	0.0786195
		0.636248	0.0801792																					0.619959	0.0768434	0.624341	0.0773588	0.622811	0.0770177	0.627101	0.0773758	0.622035	0.077487	0.628837	0.0776106	0.619899	0.0776006	0.622545	0.0773558	0.617231	0.077435	0.630503	0.0776999	0.624273	0.0779156	0.623056	0.0774795	0.648619	0.0787757
		0.635311	0.0803034																					0.623504	0.0769867	0.626935	0.0774903	0.627392	0.0771323	0.630558	0.0774683	0.624684	0.0775949	0.631772	0.0777147	0.62366	0.077701	0.628379	0.077447	0.620742	0.0776164	0.633737	0.0778302	0.627136	0.0780268	0.627459	0.0776116	0.650824	0.0789407
		0.632845	0.0803553																					0.626962	0.0771545	0.629464	0.0776405	0.631861	0.077274	0.63393	0.0775816	0.627266	0.0777212	0.634634	0.0778382	0.627328	0.0778243	0.634071	0.0775663	0.624165	0.0778235	0.636892	0.0779827	0.629928	0.0781576	0.631753	0.0777715	0.652443	0.07911
		0.6309	0.080453																					0.630265	0.0773436	0.63188	0.0778065	0.636131	0.0774399	0.637152	0.0777136	0.629734	0.0778634	0.637369	0.0779788	0.630833	0.077968	0.639509	0.0777112	0.627436	0.0780523	0.639906	0.0781546	0.632595	0.0783056	0.635855	0.0779563	0.653431	0.079279
		0.641409	0.0804801																					0.63335	0.0775503	0.634136	0.077985	0.640118	0.0776268	0.640161	0.0778616	0.632038	0.0780187	0.639922	0.0781337	0.634106	0.0781294	0.644588	0.0778789	0.630488	0.0782983	0.64272	0.0783423	0.635086	0.0784678	0.639687	0.0781622	0.653762	0.079443
		0.643651	0.080488																					0.636155	0.0777706	0.636187	0.0781726	0.643746	0.077831	0.642898	0.0780227	0.634133	0.0781842	0.642245	0.0783	0.637083	0.0783053	0.64921	0.0780662	0.633265	0.0785568	0.64528	0.0785424	0.637352	0.078641	0.643172	0.0783853
		0.647397	0.0812205																					0.638627	0.0780001	0.637994	0.0783655	0.646943	0.0780487	0.64531	0.0781939	0.63598	0.0783566	0.644291	0.0784743	0.639707	0.0784922	0.653283	0.0782695	0.63571	0.0788228	0.647535	0.0787508	0.639348	0.078822	0.646243	0.0786212
		0.651369	0.0820827																					0.640717	0.0782345	0.639522	0.0785601	0.649647	0.0782755	0.64735	0.0783718	0.637541	0.0785325	0.646022	0.0786533	0.641927	0.0786867	0.656729	0.0784847	0.637778	0.079091	0.649442	0.0789635	0.641036	0.0790071	0.648841	0.0788654
		IsoLine	IsoLine																					0.642385	0.0784692	0.64074	0.0787526	0.651806	0.0785071	0.648979	0.0785529	0.638787	0.0787086	0.647403	0.0788335	0.643699	0.0788848	0.659481	0.0787078	0.639427	0.0793563	0.650963	0.0791765	0.642383	0.0791928	0.650914	0.0791131
																								0.643598	0.0786995	0.641626	0.0789391	0.653378	0.0787389	0.650165	0.0787337	0.639693	0.0788813	0.648408	0.0790114	0.644989	0.0790827	0.661485	0.0789343	0.640625	0.0796134	0.65207	0.0793855	0.643363	0.0793754	0.652423	0.0793595
																								0.644333	0.078921	0.642162	0.0791162	0.654331	0.0789665	0.650884	0.0789107	0.640241	0.0790474	0.649017	0.0791835	0.645771	0.0792766	0.662702	0.0791598	0.64135	0.0798575	0.65274	0.0795864	0.643956	0.0795515	0.653338	0.0795997
																								0.644574	0.0791295	0.642337	0.0792803	0.654649	0.0791853	0.651123	0.0790805	0.640422	0.0792035	0.649218	0.0793466	0.646031	0.0794627	0.663109	0.07938	0.641587	0.0800836	0.652961	0.0797754	0.644152	0.0797176	0.653642	0.0798291
[truncated: 60 more columns]

## Sheet: PlotDat1
Source sheet	Hoja1	0.703036	0.0883963	0.44764	0.06	0.411563	0.0557947	0.729474	0.0896862	0.741672	0.0892578	0.747061	0.0896027	0.760334	0.0904972	0.762476	0.0903365	0.755829	0.0916291	0.822696	0.09722	1.84219	0.174971
Plot name	Concordia1	0.722244	0.0885463	0.44764	0.06	0.482812	0.0640155	0.728381	0.0900889	0.740874	0.0895355	0.745862	0.0899136	0.758628	0.0910465	0.760843	0.0908122	0.754522	0.092104	0.821706	0.0975243	1.83985	0.175637
Plot Type	1	0.717581	0.0891846	0.487494	0.0645441	0.557657	0.0723004	0.725234	0.0903545	0.738566	0.0897329	0.742372	0.0901656	0.753682	0.0914636	0.756097	0.0911866	0.750768	0.0923979	0.818833	0.0977574	1.83308	0.176087
1st free col	25	0.718621	0.0894146	0.528445	0.0691076	0.636279	0.0806498	0.720289	0.0904614	0.734936	0.0898343	0.736874	0.090338	0.745896	0.0917147	0.748622	0.0914294	0.744871	0.092487	0.814309	0.0979004	1.82243	0.176285
Sigma Level	2	0.722412	0.0895621	0.570523	0.0736907	0.718871	0.0890642	0.713947	0.0904011	0.730278	0.0898313	0.729812	0.090417	0.735899	0.0917794	0.739023	0.0915209	0.73731	0.0923642	0.8085	0.0979418	1.80876	0.176215
Absolute Errs	FALSE	0.724318	0.0898706	0.613759	0.0782934	0.805631	0.097544	0.70672	0.0901783	0.72497	0.0897242	0.72176	0.0903961	0.724503	0.0916526	0.728079	0.0914538	0.728695	0.0920394	0.801877	0.0978781	1.79317	0.175882
Symbol Type	1	0.798454	0.0966456	0.658186	0.0829159	0.89677	0.10609	0.699195	0.0898112	0.71944	0.0895217	0.713369	0.0902771	0.71263	0.0913445	0.716676	0.0912333	0.719726	0.0915389	0.794977	0.0977146	1.77693	0.175314
Inverse Plot	FALSE	1.78514	0.172974	0.703836	0.0875582	0.99251	0.114702	0.691981	0.0893294	0.714137	0.0892401	0.705319	0.0900696	0.701243	0.09088	0.705737	0.0908775	0.711129	0.0909032	0.788359	0.0974645	1.76136	0.174556
Color Plot	TRUE	IsoLine	IsoLine	0.750743	0.0922204	1.09308	0.123382	0.685663	0.0887721	0.709491	0.0889023	0.698263	0.0897904	0.691264	0.0902968	0.696149	0.0904151	0.703601	0.0901839	0.782558	0.097148	1.74771	0.17367
3D plot	FALSE			0.798941	0.0969025	1.19873	0.132129	0.680752	0.0881842	0.705879	0.0885357	0.692772	0.0894621	0.6835	0.0896421	0.688689	0.0898836	0.697751	0.0894392	0.778046	0.0967909	1.7371	0.172728
Linear	FALSE			0.848466	0.101605	1.30971	0.140944	0.677646	0.0876136	0.703592	0.08817	0.68929	0.0891114	0.678582	0.088969	0.683961	0.089326	0.694053	0.0887294	0.775186	0.0964219	1.73037	0.171806
Data Range	H58:L65			0.899354	0.106327	1.42629	0.149828	0.676598	0.0871064	0.702816	0.0878347	0.688101	0.0887665	0.676908	0.088332	0.682348	0.0887876	0.692807	0.0881121	0.774212	0.0960711	1.72809	0.170978
Filled Symbols	FALSE			0.951643	0.11107	1.54876	0.158781	0.677691	0.0867036	0.703615	0.0875571	0.689299	0.0884555	0.678613	0.0877828	0.68398	0.0883119	0.694114	0.0876373	0.775202	0.0957668	1.73043	0.170312
ConcAge	FALSE			1.00537	0.115833	1.67741	0.167804	0.680837	0.086438	0.705922	0.0873596	0.692789	0.0882036	0.683559	0.0873657	0.688726	0.0879375	0.697868	0.0873433	0.778075	0.0955337	1.7372	0.169862
ConcSwap	FALSE			1.06058	0.120616	1.81255	0.176897	0.685782	0.0863311	0.709552	0.0872582	0.698288	0.0880312	0.691346	0.0871146	0.696202	0.0876947	0.703764	0.0872542	0.7826	0.0953907	1.74785	0.169664
1st Symbol-row	1			1.11731	0.12542	1.95452	0.186061	0.692125	0.0863914	0.71421	0.0872612	0.705349	0.0879522	0.701342	0.0870498	0.7058	0.0876032	0.711326	0.087377	0.788409	0.0953493	1.76152	0.169734
				1.1756	0.130245	2.10365	0.195296	0.699351	0.0866142	0.719519	0.0873683	0.713402	0.087973	0.712739	0.0871767	0.716744	0.0876704	0.71994	0.0877018	0.795031	0.095413	1.77711	0.170066
				1.23549	0.13509	IsoLine	IsoLine	0.706876	0.0869813	0.725048	0.0875709	0.721793	0.088092	0.724611	0.0874848	0.728148	0.0878908	0.728909	0.0882023	0.801931	0.0955765	1.79335	0.170635
				1.29704	0.139956			0.71409	0.0874631	0.730351	0.0878524	0.729842	0.0882996	0.735999	0.0879493	0.739087	0.0882466	0.737506	0.088838	0.80855	0.0958266	1.80892	0.171392
				1.36027	0.144843			0.720408	0.0880205	0.734997	0.0881902	0.736899	0.0885788	0.745978	0.0885325	0.748675	0.088709	0.745035	0.0895573	0.81435	0.0961431	1.82257	0.172278
				1.42525	0.14975			0.725319	0.0886083	0.738609	0.0885568	0.74239	0.0889071	0.753741	0.0891871	0.756135	0.0892405	0.750885	0.090302	0.818863	0.0965002	1.83318	0.173221
				1.49202	0.154679			0.728425	0.0891789	0.740896	0.0889226	0.745872	0.0892578	0.758659	0.0898602	0.760863	0.0897981	0.754583	0.0910118	0.821722	0.0968692	1.83991	0.174143
				1.56062	0.159629			0.729474	0.0896862	0.741672	0.0892578	0.747061	0.0896027	0.760334	0.0904972	0.762476	0.0903365	0.755829	0.0916291	0.822696	0.09722	1.84219	0.174971
				1.63112	0.1646
				1.70355	0.169593
				1.77798	0.174606
				1.85446	0.179642
				1.93304	0.184699
				2.01379	0.189777
				2.09676	0.194878
				2.18201	0.2
				2.18201	0.2
				IsoLine	IsoLine

## Sheet: PlotDat4
Source sheet	Hoja1	0.619018	0.0782477	0.536637	0.07	0.557657	0.0723004	0.644574	0.0791295	0.642337	0.0792803	0.654649	0.0791853	0.651123	0.0790805	0.640422	0.0792035	0.649218	0.0793466	0.646031	0.0794627	0.663109	0.07938	0.641587	0.0800836	0.652961	0.0797754	0.644152	0.0797176	0.653642	0.0798291	0.653762	0.079443	0.663893	0.0798555	0.654935	0.0799367	0.644112	0.0799724	0.651221	0.080295	0.641953	0.079931	0.642821	0.0804015	0.665387	0.0802867	0.65356	0.0801361
Plot name	Concordia2	0.623639	0.07845	0.557657	0.0723004	0.636279	0.0806498	0.643525	0.0794983	0.641565	0.0795624	0.653302	0.0795882	0.650106	0.0793915	0.639638	0.0794797	0.648352	0.0796386	0.644925	0.079804	0.661401	0.0797959	0.640542	0.0804725	0.652004	0.0801098	0.643305	0.0800127	0.652345	0.0802464	0.652769	0.0797019	0.662506	0.0802582	0.653784	0.0803074	0.64332	0.0802546	0.650179	0.0806732	0.641019	0.080227	0.642094	0.0806716	0.663956	0.0807124	0.652686	0.0804103
Plot Type	1	0.621628	0.0785194	0.592423	0.0760352	0.718871	0.0890642	0.640491	0.0797659	0.639342	0.0797545	0.64939	0.0799045	0.647153	0.0796334	0.637371	0.0796796	0.645842	0.0798557	0.641713	0.0800701	0.656424	0.080138	0.637531	0.0807371	0.649235	0.080352	0.640855	0.0802287	0.648583	0.0805663	0.649876	0.0799118	0.658475	0.0805768	0.650445	0.080591	0.641029	0.0804575	0.64717	0.0809382	0.638304	0.0804561	0.640002	0.0808524	0.659797	0.0810472	0.650147	0.0806219
1st free col	109	0.626206	0.0785381	0.627965	0.079783	0.805631	0.097544	0.635716	0.0799104	0.635846	0.0798409	0.643229	0.0801086	0.642504	0.0797866	0.633805	0.0797871	0.641892	0.0799805	0.636654	0.0802393	0.648582	0.0803787	0.632799	0.0808561	0.64488	0.0804825	0.637001	0.0803482	0.64266	0.0807629	0.64532	0.0800559	0.652125	0.0807854	0.645188	0.0807642	0.637426	0.0805645	0.642439	0.0810686	0.634031	0.0806	0.636712	0.0809292	0.653247	0.081264	0.646151	0.0807539
Sigma Level	2	0.621332	0.0785388	0.664301	0.0835439	0.89677	0.10609	0.629589	0.0799202	0.631361	0.0798145	0.635317	0.080184	0.636533	0.0798386	0.629228	0.0797934	0.636822	0.0800027	0.63016	0.0802981	0.638511	0.0804983	0.626728	0.0808197	0.63929	0.0804908	0.632053	0.0803615	0.635056	0.0808204	0.639468	0.0801224	0.64397	0.0808671	0.638438	0.0808132	0.632803	0.0805672	0.636369	0.0810537	0.628544	0.0806468	0.632493	0.0808957	0.644836	0.0813451	0.641019	0.0807956
Absolute Errs	FALSE	0.628066	0.0787151	0.701448	0.0873179	0.99251	0.114702	0.622606	0.0797946	0.626251	0.0796777	0.626297	0.0801245	0.629726	0.0797852	0.624011	0.0796982	0.631043	0.0799207	0.622755	0.0802416	0.627026	0.0804872	0.619811	0.080631	0.632918	0.0803761	0.626414	0.0802674	0.626386	0.080734	0.632795	0.080106	0.634673	0.0808153	0.630744	0.0807339	0.627533	0.0804652	0.629451	0.0808949	0.622288	0.0805928	0.627686	0.0807547	0.635247	0.0812841	0.635168	0.0807435
Symbol Type	1	0.618925	0.0788753	0.739423	0.091105	1.09308	0.123382	0.615331	0.0795436	0.620929	0.0794414	0.616898	0.0799349	0.622634	0.0796309	0.618578	0.079509	0.625022	0.0797409	0.61504	0.0800744	0.615057	0.0803464	0.612607	0.0803052	0.626282	0.0801477	0.62054	0.0800735	0.617355	0.0805108	0.625841	0.0800079	0.624985	0.0806341	0.622728	0.0805328	0.622045	0.0802669	0.622247	0.0806048	0.615771	0.0804423	0.622679	0.0805176	0.625255	0.0810859	0.629073	0.0806019
Inverse Plot	FALSE	0.62106	0.0788851	0.778247	0.0949053	1.19873	0.132129	0.608356	0.0791876	0.615827	0.0791248	0.607883	0.0796307	0.615831	0.079388	0.613367	0.0792412	0.619248	0.0794781	0.60764	0.0798101	0.603575	0.0800871	0.605701	0.0798688	0.619917	0.0798242	0.614908	0.0797957	0.608692	0.0801688	0.61917	0.0798362	0.615692	0.0803383	0.615039	0.0802262	0.616782	0.0799882	0.615339	0.0802071	0.609519	0.0802076	0.61788	0.0802035	0.61567	0.0807665	0.623226	0.0803823
Color Plot	FALSE	0.616278	0.078939	0.817937	0.0987189	1.30971	0.140944	0.602244	0.0787555	0.611357	0.0787535	0.599981	0.0792364	0.609869	0.0790762	0.608802	0.0789165	0.614188	0.0791534	0.601154	0.07947	0.593509	0.0797305	0.599652	0.079357	0.614341	0.0794318	0.609972	0.0794564	0.6011	0.0797358	0.613322	0.0796047	0.607547	0.0799518	0.608301	0.0798388	0.612171	0.0796518	0.609287	0.079734	0.60404	0.0799077	0.613677	0.0798381	0.607269	0.0803518	0.618102	0.0801024
3D plot	FALSE	0.629644	0.0789731	0.858512	0.102546	1.42629	0.149828	0.597491	0.0782823	0.607883	0.0783576	0.593833	0.078784	0.60523	0.0787209	0.605252	0.0785612	0.610253	0.0787933	0.596107	0.0790817	0.585676	0.0793054	0.59495	0.0788113	0.610005	0.0790021	0.606133	0.0790831	0.595194	0.0792468	0.608771	0.0793322	0.601209	0.079506	0.603059	0.0794022	0.608585	0.0792849	0.604582	0.0792237	0.599778	0.0795668	0.610409	0.0794507	0.600733	0.0798754	0.614116	0.079785
Linear	FALSE	0.623515	0.0790366	0.899994	0.106386	1.54876	0.158781	0.594482	0.0778062	0.605685	0.0779692	0.589936	0.0783102	0.60229	0.0783507	0.603004	0.0782041	0.60776	0.0784267	0.59291	0.0786767	0.580709	0.0788462	0.591975	0.078276	0.607259	0.0785702	0.603703	0.078706	0.591452	0.0787414	0.605886	0.0790407	0.597192	0.0790369	0.599738	0.0789516	0.606315	0.0789173	0.601604	0.0787177	0.597077	0.0792126	0.608343	0.0790729	0.596591	0.0793759	0.61159	0.0794557
Data Range	H16:L65	0.62191	0.0790449	0.942401	0.110239	1.67741	0.167804	0.593461	0.077366	0.604941	0.0776198	0.588607	0.0778534	0.601288	0.0779958	0.602241	0.0778741	0.606913	0.0780836	0.59182	0.0782878	0.57901	0.0783902	0.59097	0.0777944	0.606328	0.0781708	0.602878	0.0783557	0.590178	0.0782607	0.6049	0.078754	0.595821	0.0785825	0.598608	0.0785235	0.605545	0.0785786	0.600596	0.0782569	0.596157	0.0788738	0.607645	0.0787353	0.595178	0.0788937	0.610729	0.0791412
Filled Symbols	FALSE	0.629331	0.0790985	0.985755	0.114106	1.81255	0.176897	0.59451	0.0769971	0.605713	0.0773376	0.589954	0.0774505	0.602305	0.0776847	0.603025	0.077598	0.607779	0.0777916	0.592925	0.0779465	0.580719	0.0779743	0.592015	0.0774055	0.607285	0.0778365	0.603724	0.0780606	0.591474	0.0778434	0.605894	0.0784952	0.597208	0.0781798	0.599758	0.0781527	0.606338	0.0782965	0.601638	0.0778787	0.597092	0.0785778	0.608372	0.0784651	0.596609	0.078468	0.611604	0.078867
ConcAge	FALSE	0.629857	0.079219	1.03008	0.117987	1.95452	0.186061	0.597544	0.0767296	0.607937	0.0771456	0.593866	0.0771342	0.605258	0.0774429	0.605292	0.0773981	0.610289	0.0775744	0.596138	0.0776805	0.585695	0.0776321	0.595025	0.0771409	0.610053	0.0775942	0.606174	0.0778445	0.595236	0.0775235	0.608786	0.0782852	0.60124	0.0778612	0.603098	0.0778692	0.608628	0.0780936	0.604647	0.0776136	0.599806	0.0783486	0.610465	0.0782843	0.600768	0.0781332	0.614142	0.0786554
ConcSwap	FALSE	0.626771	0.0792301	1.07539	0.121881	IsoLine	IsoLine	0.602319	0.076585	0.611432	0.0770592	0.600027	0.0769301	0.609908	0.0772897	0.608858	0.0772906	0.614239	0.0774497	0.601196	0.0775112	0.593537	0.0773915	0.599758	0.0770219	0.614409	0.0774637	0.610029	0.077725	0.601159	0.0773269	0.613343	0.0781411	0.60759	0.0776526	0.608355	0.077696	0.612231	0.0779865	0.609378	0.0774832	0.60408	0.0782048	0.613754	0.0782076	0.607318	0.0779165	0.618139	0.0785233
1st Symbol-row	1	0.624829	0.0792755	1.12171	0.125788			0.608446	0.0765752	0.615917	0.0770855	0.607939	0.0768547	0.615878	0.0772377	0.613435	0.0772842	0.619309	0.0774274	0.607691	0.0774524	0.603608	0.0772719	0.605828	0.0770583	0.619999	0.0774555	0.614976	0.0777118	0.608763	0.0772694	0.619195	0.0780746	0.615744	0.0775709	0.615104	0.077647	0.616854	0.0779839	0.615448	0.0774981	0.609567	0.078158	0.617973	0.0782411	0.615728	0.0778353	0.62327	0.0784817
		0.625908	0.0792759	1.16906	0.129709			0.615429	0.0767008	0.621027	0.0772224	0.616959	0.0769142	0.622685	0.077291	0.618652	0.0773795	0.625089	0.0775095	0.615095	0.0775089	0.615093	0.0772829	0.612746	0.077247	0.62637	0.0775702	0.620615	0.0778059	0.617433	0.0773558	0.625868	0.0780911	0.625042	0.0776227	0.622798	0.0777263	0.622124	0.0780859	0.622365	0.077657	0.615822	0.078212	0.622781	0.0783821	0.625318	0.0778963	0.629121	0.0785338
		0.619055	0.0794024	1.21748	0.133644			0.622704	0.0769518	0.626349	0.0774587	0.626358	0.0771038	0.629777	0.0774454	0.624086	0.0775687	0.631109	0.0776892	0.622811	0.0776761	0.627062	0.0774238	0.619949	0.0775728	0.633007	0.0777985	0.626489	0.0779997	0.626464	0.077579	0.632822	0.0781891	0.634729	0.0778039	0.630814	0.0779274	0.627612	0.0782842	0.62957	0.077947	0.62234	0.0783624	0.627787	0.0786192	0.63531	0.0780946	0.635216	0.0786753
		0.625233	0.0795684	1.26697	0.137593			0.629679	0.0773078	0.631452	0.0777753	0.635373	0.077408	0.63658	0.0776883	0.629296	0.0778365	0.636883	0.0779521	0.630211	0.0779405	0.638544	0.077683	0.626855	0.0780092	0.639371	0.078122	0.632122	0.0782775	0.635127	0.077921	0.639493	0.0783609	0.644022	0.0780997	0.638503	0.078234	0.632875	0.0785629	0.636478	0.0783448	0.628591	0.0785971	0.632586	0.0789332	0.644895	0.078414	0.641063	0.078895
		0.630282	0.0795902	1.31757	0.141555			0.635791	0.0777399	0.635921	0.0781466	0.643275	0.0778023	0.642542	0.0780001	0.633861	0.0781612	0.641943	0.0782767	0.636697	0.0782805	0.64861	0.0780397	0.632905	0.078521	0.644947	0.0785145	0.637058	0.0786169	0.642719	0.078354	0.64534	0.0785924	0.652168	0.0784862	0.645241	0.0786214	0.637487	0.0788993	0.64253	0.0788179	0.63407	0.0788971	0.63679	0.0792987	0.653295	0.0788287	0.646187	0.0791748
		0.632145	0.0796386	1.3693	0.145531			0.640544	0.0782131	0.639395	0.0785425	0.649423	0.0782547	0.647181	0.0783554	0.637412	0.0785165	0.645879	0.0786369	0.641743	0.0786688	0.656444	0.0784648	0.637607	0.0790667	0.649284	0.0789441	0.640896	0.0789902	0.648625	0.078843	0.649891	0.0788649	0.658505	0.078932	0.650483	0.079058	0.641072	0.0792662	0.647235	0.0793282	0.638332	0.0792379	0.640057	0.079686	0.659832	0.0793051	0.650174	0.0794923
		0.624767	0.0796921	1.42218	0.149521			0.643553	0.0786892	0.641593	0.0789308	0.65332	0.0787285	0.650121	0.0787255	0.639659	0.0788736	0.648371	0.0790034	0.644941	0.0790738	0.661411	0.0789239	0.640581	0.079602	0.652029	0.0793761	0.643326	0.0793673	0.652367	0.0793484	0.652776	0.0791563	0.662522	0.0794011	0.653804	0.0795086	0.643342	0.0796338	0.650212	0.0798342	0.641033	0.0795921	0.642123	0.0800638	0.663974	0.0798046	0.6527	0.0798216
		0.623625	0.079765	1.47624	0.153524			0.644574	0.0791295	0.642337	0.0792803	0.654649	0.0791853	0.651123	0.0790805	0.640422	0.0792035	0.649218	0.0793466	0.646031	0.0794627	0.663109	0.07938	0.641587	0.0800836	0.652961	0.0797754	0.644152	0.0797176	0.653642	0.0798291	0.653762	0.079443	0.663893	0.0798555	0.654935	0.0799367	0.644112	0.0799724	0.651221	0.080295	0.641953	0.079931	0.642821	0.0804015	0.665387	0.0802867	0.65356	0.0801361
		0.628156	0.0797889	1.53151	0.157542			Black	Black	Black	Black	Black	Black	Black	Black	Black	Black	Black	Black	Black	Black	Black	Black	Black	Black	Black	Black	Black	Black	Black	Black	Black	Black	Black	Black	Black	Black	Black	Black	Black	Black	Black	Black	Black	Black	Black	Black	Black	Black
		0.628248	0.0797936	1.58801	0.161574
		0.627327	0.0798306	1.64577	0.16562
		0.620496	0.0798926	1.70483	0.169679
		0.633005	0.0799559	1.7652	0.173753
		0.636358	0.0799581	1.82692	0.177842
		0.637365	0.0800366	1.89001	0.181944
		0.638786	0.0801112	1.95452	0.186061
		0.628081	0.0801276	2	0.18891
		0.626609	0.0801291	IsoLine	IsoLine
		0.632076	0.0801368
		0.636248	0.0801792
		0.635311	0.0803034
		0.632845	0.0803553
		0.6309	0.080453
		0.641409	0.0804801
		0.643651	0.080488
		0.647397	0.0812205
		0.651369	0.0820827
		0.703036	0.0883963
		0.722244	0.0885463
		0.717581	0.0891846
		0.718621	0.0894146
		0.722412	0.0895621
		0.724318	0.0898706
		0.798454	0.0966456
		1.78514	0.172974
		IsoLine	IsoLine
[truncated: 58 more columns]

## Sheet: PlotDat2
Source sheet	Hoja1	0.619018	0.0782477	0.554888	0.072	0.542391	0.0706383	0.644574	0.0791295	0.642337	0.0792803	0.654649	0.0791853	0.651123	0.0790805	0.640422	0.0792035	0.649218	0.0793466	0.646031	0.0794627	0.663109	0.07938	0.641587	0.0800836	0.652961	0.0797754	0.644152	0.0797176	0.653642	0.0798291	0.653762	0.079443	0.663893	0.0798555	0.654935	0.0799367	0.644112	0.0799724	0.651221	0.080295	0.641953	0.079931	0.642821	0.0804015	0.665387	0.0802867	0.65356	0.0801361
Plot name	Concordia3	0.623639	0.07845	0.554888	0.072	0.573073	0.0739651	0.644006	0.0794088	0.641918	0.0794952	0.654193	0.0794274	0.650573	0.0793144	0.639997	0.0794127	0.648749	0.0795671	0.645433	0.0797193	0.662533	0.0796279	0.64123	0.0803223	0.652442	0.0800286	0.643693	0.0799408	0.653202	0.0800808	0.653225	0.0796368	0.663424	0.0800972	0.654312	0.080216	0.643682	0.0801863	0.650655	0.0805823	0.641448	0.0801536	0.642426	0.0806075	0.664903	0.0805424	0.653087	0.0803424
Plot Type	1	0.621628	0.0785194	0.564312	0.0730208	0.604365	0.0773023	0.642345	0.0796373	0.6407	0.0796644	0.652849	0.0796447	0.648958	0.0795144	0.638756	0.0795836	0.647376	0.0797504	0.643676	0.079939	0.660825	0.0798556	0.640193	0.0805232	0.650927	0.0802357	0.642352	0.0801246	0.651909	0.0803041	0.651644	0.0798071	0.66204	0.0803149	0.652486	0.0804522	0.642429	0.0803603	0.649008	0.0808125	0.639963	0.0803435	0.64128	0.0807682	0.663475	0.0807721	0.651699	0.080518
1st free col	187	0.626206	0.0785381	0.573793	0.0740425	0.636279	0.0806498	0.639664	0.0798051	0.638737	0.0797806	0.650654	0.0798313	0.646349	0.0796717	0.636754	0.0797089	0.645159	0.0798885	0.640838	0.0801122	0.658032	0.0800568	0.638503	0.0806809	0.648482	0.0803875	0.640188	0.0802608	0.649798	0.0804932	0.649088	0.0799464	0.659777	0.0805028	0.649535	0.080635	0.640406	0.0804869	0.646351	0.0809756	0.637565	0.0804922	0.639432	0.0808764	0.661141	0.0809696	0.649456	0.0806551
Sigma Level	2	0.621332	0.0785388	0.583331	0.0750652	0.668829	0.0840077	0.636082	0.0799049	0.636113	0.0798386	0.647667	0.0799821	0.642859	0.0797794	0.634078	0.079783	0.642195	0.0799753	0.637042	0.0802314	0.654231	0.0802261	0.636207	0.0807911	0.645213	0.0804776	0.637296	0.0803435	0.646926	0.0806427	0.645668	0.0800486	0.656699	0.0806556	0.64559	0.0807564	0.637702	0.0805606	0.642801	0.0810644	0.634358	0.0805933	0.636964	0.0809275	0.657965	0.0811294	0.646456	0.0807479
Absolute Errs	FALSE	0.628066	0.0787151	0.592927	0.0760889	0.702025	0.087376	0.631753	0.0799322	0.632945	0.0798359	0.64397	0.080093	0.638642	0.0798329	0.630844	0.0798027	0.638613	0.080007	0.632454	0.0802913	0.649526	0.0803588	0.633368	0.0808508	0.641264	0.0805019	0.633801	0.0803691	0.643372	0.0807486	0.641535	0.0801093	0.652888	0.0807692	0.640822	0.0808111	0.634436	0.0805781	0.638513	0.081075	0.630482	0.0806424	0.633983	0.0809191	0.654035	0.0812473	0.642831	0.0807921
Symbol Type	1	0.618925	0.0788753	0.602581	0.0771135	0.735883	0.0907549	0.626868	0.0798859	0.62937	0.0797726	0.639663	0.080161	0.633881	0.0798298	0.627195	0.0797673	0.63457	0.0799822	0.627275	0.0802893	0.644043	0.0804513	0.630062	0.0808583	0.636807	0.0804594	0.629856	0.0803365	0.639232	0.0808081	0.636868	0.0801259	0.648449	0.0808406	0.63544	0.0807967	0.63075	0.0805387	0.633673	0.081007	0.626106	0.0806372	0.63062	0.0808517	0.649456	0.08132	0.638739	0.0807859
Inverse Plot	FALSE	0.62106	0.0788851	0.612294	0.0781391	0.770413	0.0941442	0.62164	0.079768	0.625544	0.0796516	0.634864	0.0801842	0.628785	0.0797703	0.62329	0.0796781	0.630243	0.0799021	0.621731	0.0802255	0.637934	0.080501	0.626381	0.0808135	0.632037	0.0803519	0.625634	0.080247	0.63462	0.0808194	0.631871	0.0800975	0.643503	0.0808677	0.62968	0.0807139	0.626805	0.0804441	0.628495	0.0808633	0.621423	0.0805781	0.627021	0.0807283	0.644355	0.0813455	0.634359	0.0807296
Color Plot	FALSE	0.616278	0.078939	0.622066	0.0791657	0.805631	0.097544	0.616297	0.0795837	0.621635	0.079478	0.629704	0.080162	0.623575	0.0796569	0.619299	0.0795391	0.625821	0.0797701	0.616064	0.0801027	0.631365	0.0805067	0.622423	0.0807176	0.627163	0.0801842	0.62132	0.0801047	0.629661	0.0807824	0.626764	0.0800255	0.638185	0.0808499	0.623792	0.0805662	0.622773	0.0802984	0.623203	0.0806503	0.616636	0.0804676	0.623344	0.0805541	0.638869	0.0813231	0.629882	0.0806256
3D plot	FALSE	0.629644	0.0789731	0.631897	0.0801933	0.841549	0.100954	0.611073	0.0793409	0.617814	0.0792595	0.624324	0.080095	0.618481	0.0794946	0.615397	0.0793564	0.621497	0.079592	0.610522	0.0799262	0.624514	0.0804681	0.618299	0.0805731	0.622396	0.0799635	0.617102	0.0799156	0.624491	0.0806979	0.621769	0.0799129	0.63264	0.0807876	0.618034	0.0803601	0.618832	0.080108	0.618029	0.0803772	0.611955	0.0803105	0.619749	0.0803369	0.633149	0.0812534	0.625504	0.0804785
Linear	FALSE	0.623515	0.0790366	0.641787	0.0812219	IsoLine	IsoLine	0.606196	0.0790504	0.614247	0.0790056	0.61887	0.079985	0.613725	0.0792905	0.611754	0.079138	0.61746	0.0793755	0.605348	0.0797039	0.617569	0.0803864	0.614119	0.080384	0.617947	0.0796996	0.613164	0.0796882	0.61925	0.0805684	0.617104	0.0797648	0.627018	0.0806824	0.612659	0.0801046	0.615152	0.0798812	0.6132	0.080056	0.607584	0.0801138	0.616395	0.080086	0.627352	0.0811384	0.621416	0.0802947
Data Range	H16:L64	0.62191	0.0790449	0.651737	0.0822514			0.60188	0.0787249	0.611091	0.0787275	0.613492	0.079835	0.609514	0.0790536	0.60853	0.0788934	0.613887	0.0791302	0.600767	0.0794453	0.61072	0.0802637	0.609998	0.0801556	0.614009	0.0794039	0.609678	0.0794323	0.614082	0.0803973	0.612974	0.0795876	0.621474	0.0805374	0.6079	0.0798109	0.611896	0.079628	0.608926	0.0797006	0.603714	0.0798859	0.613426	0.0798126	0.621634	0.0809811	0.617797	0.0800822
Filled Symbols	FALSE	0.629331	0.0790985	0.661748	0.0832819			0.598312	0.0783784	0.608483	0.0784372	0.608335	0.0796492	0.606032	0.0787941	0.605865	0.0786333	0.610933	0.0788667	0.59698	0.0791618	0.604152	0.0801034	0.606048	0.0798939	0.610754	0.0790894	0.606797	0.079159	0.609127	0.0801894	0.609558	0.0793889	0.616159	0.0803564	0.603965	0.0794918	0.609205	0.0793593	0.605395	0.0793268	0.600515	0.079637	0.610974	0.0795285	0.616152	0.0807859	0.614805	0.0798503
ConcAge	FALSE	0.629857	0.079219	0.671819	0.0843134			0.59565	0.0780263	0.606538	0.0781475	0.603542	0.0794325	0.603432	0.0785234	0.603876	0.0783691	0.608728	0.0785967	0.594152	0.0788657	0.598046	0.0799099	0.602377	0.0796063	0.608325	0.0787698	0.604647	0.0788805	0.604521	0.0799502	0.607007	0.0791776	0.611218	0.0801444	0.601028	0.0791612	0.607196	0.079087	0.60276	0.0789506	0.598126	0.0793777	0.609145	0.0792461	0.611055	0.0805581	0.612571	0.0796091
ConcSwap	FALSE	0.626771	0.0792301	0.681952	0.0853459			0.594009	0.0776838	0.60534	0.077871	0.599241	0.0791909	0.601827	0.0782534	0.602651	0.0781123	0.607368	0.0783318	0.592406	0.0785701	0.592567	0.0796884	0.599086	0.0793004	0.606828	0.0784591	0.603321	0.0786087	0.600389	0.0796863	0.605431	0.0789628	0.606785	0.0799071	0.599216	0.0788337	0.605958	0.0788229	0.601137	0.0785887	0.596652	0.0791196	0.608019	0.0789778	0.606483	0.0803039	0.611192	0.0793693
1st Symbol-row	1	0.624829	0.0792755	0.692146	0.0863794			0.593461	0.077366	0.604941	0.0776198	0.595551	0.078931	0.601288	0.0779958	0.602241	0.0778741	0.606913	0.0780836	0.59182	0.0782878	0.587866	0.079445	0.596264	0.0789846	0.606328	0.0781708	0.602878	0.0783557	0.596844	0.0794049	0.6049	0.078754	0.602981	0.0796511	0.598608	0.0785235	0.605545	0.0785786	0.600596	0.0782569	0.596157	0.0788738	0.607645	0.0787353	0.60256	0.0800302	0.610729	0.0791412
		0.625908	0.0792759	0.702401	0.0874138			0.594029	0.0770867	0.60536	0.0774049	0.592572	0.0786599	0.601838	0.0777619	0.602666	0.077665	0.607382	0.077863	0.592418	0.0780312	0.58407	0.0791864	0.593987	0.0786676	0.606846	0.0779176	0.603337	0.0781324	0.593983	0.0791137	0.605437	0.0785602	0.59991	0.0793833	0.59923	0.0782442	0.605975	0.0783648	0.601162	0.0779696	0.596663	0.0786511	0.60804	0.0785292	0.599393	0.0797445	0.611202	0.0789349
		0.619055	0.0794024	0.712719	0.0884493			0.59569	0.0768581	0.606578	0.0772356	0.590386	0.0783849	0.603453	0.0775619	0.603907	0.077494	0.608755	0.0776797	0.594174	0.0778115	0.581283	0.0789195	0.592319	0.078358	0.608362	0.0777106	0.604677	0.0779487	0.591884	0.0788206	0.607018	0.0783899	0.597656	0.079111	0.601057	0.078008	0.607229	0.0781908	0.602809	0.0777393	0.598147	0.0784612	0.609186	0.0783686	0.597069	0.0794546	0.612591	0.0787593
		0.625233	0.0795684	0.723099	0.0894857			0.598371	0.0766903	0.608542	0.0771195	0.589053	0.0781136	0.606062	0.0774046	0.605909	0.0773688	0.610972	0.0775417	0.597013	0.0776383	0.579581	0.0786516	0.591304	0.0780643	0.610807	0.0775587	0.606841	0.0778125	0.590604	0.0785337	0.609574	0.0782507	0.596281	0.0788416	0.604007	0.0778252	0.609251	0.0780642	0.605465	0.0775763	0.600545	0.0783125	0.611034	0.0782603	0.595651	0.0791684	0.614833	0.0786221
		0.630282	0.0795902	0.733542	0.0905231			0.601953	0.0765905	0.611165	0.0770615	0.588607	0.0778534	0.609552	0.0772969	0.608586	0.0772946	0.613937	0.0774549	0.600809	0.0775191	0.57901	0.0783902	0.59097	0.0777944	0.614076	0.0774687	0.609734	0.0777298	0.590178	0.0782607	0.612994	0.0781484	0.595821	0.0785825	0.607952	0.0777038	0.611955	0.0779905	0.609016	0.0774875	0.603753	0.0782114	0.613502	0.0782093	0.595178	0.0788937	0.617833	0.0785294
		0.632145	0.0796386	0.744049	0.0915615			0.606282	0.0765632	0.614333	0.0770642	0.589063	0.0776113	0.613769	0.0772434	0.611819	0.0772749	0.617518	0.0774232	0.605397	0.0774592	0.579587	0.0781422	0.591327	0.0775557	0.618025	0.0774444	0.613229	0.0777042	0.590617	0.078009	0.617128	0.0780877	0.59629	0.0783408	0.61272	0.077649	0.615221	0.077973	0.613304	0.0774768	0.607629	0.0781624	0.616483	0.0782176	0.595662	0.0786381	0.621458	0.0784852
		0.624767	0.0796921	0.754619	0.0926009			0.611167	0.0766095	0.617909	0.0771274	0.590406	0.077394	0.61853	0.0772464	0.615468	0.0773104	0.621561	0.0774479	0.610576	0.0774612	0.581295	0.0779145	0.592364	0.0773548	0.622482	0.0774869	0.617174	0.0777368	0.59191	0.0777857	0.621795	0.0780712	0.597675	0.0781231	0.618102	0.0776634	0.618908	0.0780124	0.618143	0.0775448	0.612004	0.0781675	0.619847	0.078285	0.59709	0.0784083	0.62555	0.0784913
		0.623625	0.079765	0.765253	0.0936413			0.616395	0.0767274	0.621734	0.0772485	0.592602	0.0772074	0.623627	0.077306	0.619373	0.0773995	0.625888	0.0775281	0.61612	0.077525	0.584087	0.0777133	0.594054	0.0771971	0.627252	0.0775943	0.621395	0.0778263	0.594021	0.0775966	0.626791	0.0780995	0.599937	0.0779352	0.623863	0.0777463	0.622852	0.078107	0.623322	0.0776885	0.616688	0.0782267	0.623445	0.0784085	0.599424	0.0782109	0.62993	0.0785477
		0.628156	0.0797889	0.775952	0.0946826			0.621738	0.0769118	0.625643	0.077422	0.595589	0.0770566	0.628836	0.0774194	0.623364	0.0775385	0.63031	0.0776601	0.621786	0.0776478	0.587888	0.0775441	0.596349	0.0770869	0.632126	0.0777621	0.62571	0.0779686	0.596893	0.0774471	0.631898	0.0781716	0.603016	0.0777824	0.62975	0.077894	0.626884	0.0782527	0.628614	0.0779015	0.621475	0.0783372	0.627122	0.0785826	0.602599	0.078051	0.634407	0.0786516
		0.628248	0.0797936	0.786715	0.095725			0.626962	0.0771545	0.629464	0.0776405	0.599286	0.0769457	0.63393	0.0775816	0.627266	0.0777212	0.634634	0.0778382	0.627328	0.0778243	0.592594	0.0774114	0.599189	0.0770272	0.636892	0.0779827	0.629928	0.0781576	0.600447	0.0773412	0.636894	0.0782841	0.606826	0.0776688	0.635508	0.0781001	0.630825	0.0784431	0.633787	0.0781746	0.626156	0.0784942	0.630717	0.0787999	0.60653	0.0779331	0.638786	0.0787988
		0.627327	0.0798306	0.797544	0.0967683			0.631839	0.077445	0.633031	0.0778944	0.603593	0.0768777	0.638687	0.0777857	0.630909	0.0779396	0.638671	0.0780546	0.632502	0.0780467	0.598076	0.0773189	0.602494	0.0770197	0.641342	0.0782467	0.633866	0.0783851	0.604587	0.0772817	0.641558	0.0784322	0.611265	0.0775974	0.640884	0.0783556	0.634505	0.0786699	0.638616	0.0784959	0.630527	0.078691	0.634071	0.0790507	0.611109	0.0778605	0.642873	0.0789826
		0.620496	0.0798926	0.808438	0.0978127			0.636155	0.0777706	0.636187	0.0781726	0.608392	0.0768545	0.642898	0.0780227	0.634133	0.0781842	0.642245	0.0783	0.637083	0.0783053	0.604185	0.0772691	0.606176	0.0770645	0.64528	0.0785424	0.637352	0.078641	0.609199	0.0772704	0.645689	0.0786095	0.616211	0.0775703	0.645643	0.0786493	0.637761	0.0789231	0.64289	0.0788512	0.634396	0.0789188	0.63704	0.0793242	0.61621	0.077835	0.646493	0.0791951
		0.633005	0.0799559	0.819399	0.098858			0.639723	0.078117	0.638795	0.0784629	0.613552	0.0768767	0.646379	0.0782822	0.636798	0.0784443	0.645198	0.0785634	0.640871	0.0785888	0.610755	0.0772635	0.610133	0.0771604	0.648534	0.0788569	0.640233	0.0789142	0.614158	0.0773074	0.649104	0.0788081	0.62153	0.0775881	0.649577	0.0789684	0.640452	0.0791918	0.646422	0.0792251	0.637596	0.0791678	0.639492	0.0796083	0.621696	0.0778574	0.649484	0.079427
		0.636358	0.0799581	0.830426	0.0999043			0.642385	0.0784692	0.64074	0.0787526	0.618932	0.0769437	0.648979	0.0785529	0.638787	0.0787086	0.647403	0.0788335	0.643699	0.0788848	0.617605	0.077302	0.614258	0.0773049	0.650963	0.0791765	0.642383	0.0791928	0.619328	0.0773919	0.651655	0.0790194	0.627075	0.0776504	0.652514	0.0792989	0.642461	0.0794641	0.649057	0.0796012	0.639984	0.079427	0.641321	0.0798907	0.627415	0.077927	0.651719	0.0796681
		0.637365	0.0800366	0.841519	0.100952			0.644026	0.0788116	0.641938	0.0790291	0.624385	0.0770537	0.650584	0.0788229	0.640013	0.0789654	0.648763	0.0790984	0.645444	0.0791804	0.62455	0.0773837	0.618438	0.0774939	0.652461	0.0794872	0.643709	0.0794645	0.624569	0.0775214	0.653231	0.0792342	0.632696	0.0777556	0.654327	0.0796265	0.643699	0.0797282	0.65068	0.0799631	0.641458	0.0796852	0.642448	0.080159	0.633213	0.0780421	0.653097	0.079908
		0.638786	0.0801112	0.85268	0.102			0.644574	0.0791295	0.642337	0.0792803	0.629764	0.0772037	0.651123	0.0790805	0.640422	0.0792035	0.649218	0.0793466	0.646031	0.0794627	0.6314	0.0775064	0.622559	0.0777224	0.652961	0.0797754	0.644152	0.0797176	0.629737	0.0776925	0.653762	0.079443	0.63824	0.0779006	0.654935	0.0799367	0.644112	0.0799724	0.651221	0.080295	0.641953	0.079931	0.642821	0.0804015	0.638931	0.0781993	0.65356	0.0801361
		0.628081	0.0801276	0.85268	0.102			Black	Black	Black	Black	0.63492	0.0773895	Black	Black	Black	Black	Black	Black	Black	Black	0.637967	0.0776667	0.626509	0.077984	Black	Black	Black	Black	0.634692	0.0779004	Black	Black	0.643555	0.0780816	Black	Black	Black	Black	Black	Black	Black	Black	Black	Black	0.644413	0.0783945	Black	Black
		0.626609	0.0801291	IsoLine	IsoLine							0.639714	0.0776062									0.644074	0.0778603	0.630179	0.0782717					0.639298	0.0781396			0.648497	0.0782936											0.64951	0.0786223
		0.632076	0.0801368									0.644015	0.0778478									0.649552	0.0780817	0.633471	0.0785776					0.64343	0.0784035			0.65293	0.0785309											0.654082	0.0788766
		0.636248	0.0801792									0.647705	0.0781077									0.654254	0.0783251	0.636293	0.0788934					0.646975	0.0786849			0.656734	0.0787869											0.658005	0.0791502
		0.635311	0.0803034									0.650683	0.0783788									0.65805	0.0785838	0.63857	0.0792104					0.649836	0.0789761			0.659804	0.0790547											0.661171	0.0794359
		0.632845	0.0803553									0.652869	0.0786538									0.660837	0.0788507	0.640238	0.07952					0.651935	0.0792692			0.662058	0.079327											0.663495	0.0797258
		0.6309	0.080453									0.654203	0.0789251									0.662539	0.0791185	0.641253	0.0798137					0.653215	0.0795561			0.663434	0.0795964											0.664914	0.080012
		0.641409	0.0804801									0.654649	0.0791853									0.663109	0.07938	0.641587	0.0800836					0.653642	0.0798291			0.663893	0.0798555											0.665387	0.0802867
		0.643651	0.080488									Black	Black									Black	Black	Black	Black					Black	Black			Black	Black											Black	Black
		0.647397	0.0812205
		0.651369	0.0820827
		0.703036	0.0883963
		0.722244	0.0885463
		0.717581	0.0891846
		0.718621	0.0894146
		0.722412	0.0895621
		0.724318	0.0898706
		0.798454	0.0966456
		IsoLine	IsoLine
[truncated: 136 more columns]

## Sheet: PlotDat5
Source sheet	Hoja1	0.619018	0.0782477	0.597727	0.076467	0.605627	0.0773023	0.613567	0.0781382	0.621545	0.0789747	0.629563	0.0798119	0.637621	0.0806498	0.645718	0.0814883	0.592092	0.076	0.593376	0.076	0.590814	0.076	0.588642	0.0756324	0.644574	0.0791295	0.654649	0.0791853	0.640422	0.0792035	0.646031	0.0794627	0.663109	0.07938	0.641587	0.0800836	0.644152	0.0797176	0.653642	0.0798291	0.631744	0.0790812
Plot name	Concordia4	0.621628	0.0785194	0.597677	0.0764963	0.605576	0.0773318	0.613515	0.0781681	0.621492	0.079005	0.629509	0.0798425	0.637566	0.0806807	0.645663	0.0815195	0.592092	0.076	0.59387	0.0760524	0.592092	0.0761364	0.596484	0.076467	0.644461	0.0792582	0.654505	0.0793233	0.640231	0.0793468	0.645913	0.0795797	0.662928	0.0795206	0.641472	0.0802212	0.64406	0.0798203	0.653503	0.0799729	0.631634	0.0791605
Plot Type	1	0.621332	0.0785388	0.59753	0.0765231	0.605427	0.077359	0.613363	0.0781956	0.621338	0.0790328	0.629353	0.0798706	0.637408	0.0807091	0.645502	0.0815483	0.59387	0.0761892	0.59565	0.0762413	0.59387	0.0763259	0.604365	0.0773023	0.64413	0.0793783	0.654081	0.0794544	0.639672	0.0794743	0.645564	0.0796908	0.66239	0.0796559	0.641143	0.080348	0.643793	0.0799164	0.653094	0.0801086	0.631309	0.079232
1st free col	45	0.618925	0.0788753	0.597298	0.0765455	0.605192	0.0773816	0.613124	0.0782184	0.621096	0.0790559	0.629107	0.079894	0.637158	0.0807327	0.645248	0.0815721	0.59565	0.0763784	0.597432	0.0764302	0.59565	0.0765155	0.612285	0.0781382	0.643585	0.0794888	0.65338	0.0795775	0.638756	0.0795836	0.644988	0.0797949	0.661499	0.0797846	0.640601	0.0804627	0.643354	0.080005	0.652419	0.0802354	0.630776	0.0792942
Sigma Level	2	0.62106	0.0788851	0.597	0.0765615	0.604889	0.0773978	0.612817	0.0782348	0.620784	0.0790724	0.628791	0.0799107	0.636837	0.0807496	0.644922	0.0815892	0.597432	0.0765677	0.599216	0.0766192	0.597432	0.0767051	0.620244	0.0789747	0.642831	0.0795887	0.652408	0.0796916	0.637501	0.0796726	0.64419	0.0798912	0.660263	0.0799056	0.639852	0.0805644	0.642745	0.0800854	0.651485	0.0803519	0.630045	0.079346
Absolute Errs	FALSE	0.616278	0.078939	0.596661	0.0765698	0.604545	0.0774062	0.612467	0.0782433	0.620429	0.079081	0.62843	0.0799194	0.63647	0.0807584	0.64455	0.0815981	0.599216	0.076757	0.601002	0.0768081	0.599216	0.0768948	0.628242	0.0798119	0.641873	0.0796771	0.651173	0.0797956	0.635932	0.0797395	0.643177	0.0799787	0.658693	0.0800179	0.638902	0.0806522	0.641971	0.0801567	0.650297	0.0804573	0.62913	0.0793863
Symbol Type	1	0.623515	0.0790366	0.596307	0.0765698	0.604185	0.0774062	0.612102	0.0782433	0.620058	0.079081	0.628054	0.0799194	0.636089	0.0807584	0.644163	0.0815981	0.601002	0.0769463	0.60279	0.0769971	0.601002	0.0770844	0.636279	0.0806498	0.64072	0.0797534	0.649686	0.0798888	0.634078	0.079783	0.641956	0.0800569	0.656801	0.0801205	0.637759	0.0807254	0.641041	0.0802186	0.648868	0.0805507	0.628051	0.0794144
Inverse Plot	FALSE	0.62191	0.0790449	0.595968	0.0765615	0.603841	0.0773978	0.611752	0.0782348	0.619703	0.0790724	0.627693	0.0799107	0.635722	0.0807496	0.643791	0.0815892	0.60279	0.0771356	0.60458	0.0771862	0.60279	0.0772741	0.644357	0.0814883	0.639383	0.0798168	0.64796	0.0799703	0.631976	0.0798023	0.640539	0.080125	0.654605	0.0802126	0.636433	0.0807834	0.639961	0.0802703	0.647208	0.0806312	0.626826	0.0794297
Color Plot	FALSE	IsoLine	IsoLine	0.59567	0.0765455	0.603538	0.0773816	0.611445	0.0782184	0.619391	0.0790559	0.627377	0.079894	0.635401	0.0807327	0.643465	0.0815721	0.60458	0.077325	0.606372	0.0773752	0.60458	0.0774639	IsoLine	IsoLine	0.637871	0.0798668	0.64601	0.0800395	0.629667	0.079797	0.638938	0.0801824	0.652122	0.0802933	0.634934	0.0808256	0.63874	0.0803115	0.645333	0.0806982	0.625481	0.0794319
3D plot	FALSE			0.595438	0.0765231	0.603303	0.077359	0.611206	0.0781956	0.619149	0.0790328	0.62713	0.0798706	0.635151	0.0807091	0.643212	0.0815483	0.606372	0.0775144	0.608166	0.0775643	0.606372	0.0776536			0.636198	0.079903	0.643851	0.0800956	0.627195	0.0797673	0.637165	0.0802287	0.649375	0.0803621	0.633277	0.0808518	0.63739	0.0803419	0.643258	0.080751	0.624041	0.079421
Linear	FALSE			0.595291	0.0764963	0.603154	0.0773318	0.611055	0.0781681	0.618995	0.079005	0.626974	0.0798425	0.634993	0.0806807	0.643051	0.0815195	0.608166	0.0777039	0.609962	0.0777535	0.608166	0.0778435			0.634379	0.079925	0.641503	0.0801384	0.62461	0.0797136	0.635238	0.0802634	0.646386	0.0804182	0.631474	0.0808616	0.635921	0.0803611	0.641001	0.0807893	0.622534	0.0793971
Data Range	H16:L27			0.595241	0.076467	0.603103	0.0773023	0.611003	0.0781382	0.618942	0.0789747	0.626921	0.0798119	0.634938	0.0806498	0.642995	0.0814883	0.609962	0.0778934	0.61176	0.0779426	0.609962	0.0780333			0.632429	0.0799328	0.638985	0.0801673	0.62196	0.079637	0.633171	0.0802863	0.64318	0.0804613	0.629542	0.080855	0.634347	0.080369	0.638581	0.0808128	0.62099	0.0793608
Filled Symbols	FALSE			0.595291	0.0764377	0.603154	0.0772727	0.611055	0.0781082	0.618995	0.0789445	0.626974	0.0797813	0.634993	0.0806188	0.643051	0.081457	0.61176	0.0780829	0.61356	0.0781318	0.61176	0.0782232			0.630365	0.0799262	0.636319	0.0801821	0.619299	0.0795391	0.630982	0.0802972	0.639786	0.0804909	0.627497	0.0808321	0.63268	0.0803655	0.636018	0.0808211	0.619439	0.0793128
ConcAge	TRUE			0.595438	0.0764108	0.603303	0.0772455	0.611206	0.0780807	0.619149	0.0789166	0.62713	0.0797532	0.635151	0.0805904	0.643212	0.0814283	0.61356	0.0782725	0.615362	0.0783211	0.61356	0.0784131			0.628204	0.0799053	0.633528	0.0801828	0.616677	0.0794217	0.628691	0.0802959	0.636233	0.0805068	0.625356	0.080793	0.630934	0.0803507	0.633336	0.0808143	0.617911	0.079254
ConcSwap	FALSE			0.59567	0.0763885	0.603538	0.0772229	0.611445	0.0780579	0.619391	0.0788935	0.627377	0.0797299	0.635401	0.0805668	0.643465	0.0814044	0.615362	0.078462	0.617166	0.0785104	0.615362	0.078603			0.625964	0.0798702	0.630635	0.0801692	0.614146	0.0792872	0.626316	0.0802825	0.63255	0.0805089	0.623137	0.0807381	0.629126	0.0803247	0.630556	0.0807924	0.616436	0.0791855
1st Symbol-row	1			0.595968	0.0763725	0.603841	0.0772067	0.611752	0.0780415	0.619703	0.078877	0.627693	0.0797131	0.635722	0.0805499	0.643791	0.0813874	0.617166	0.0786517	0.618972	0.0786997	0.617166	0.078793			0.623665	0.0798213	0.627665	0.0801416	0.611754	0.079138	0.623878	0.0802571	0.628768	0.0804971	0.62086	0.0806679	0.62727	0.0802877	0.627702	0.0807556	0.615042	0.0791087
				0.596307	0.0763642	0.604185	0.0771983	0.612102	0.078033	0.620058	0.0788684	0.628054	0.0797044	0.636089	0.0805411	0.644163	0.0813785	0.618972	0.0788413	0.62078	0.078889	0.618972	0.078983			0.621326	0.0797589	0.624644	0.0801002	0.609549	0.0789772	0.621398	0.0802199	0.624921	0.0804716	0.618544	0.0805829	0.625381	0.08024	0.624798	0.0807042	0.613756	0.079025
				0.596661	0.0763642	0.604545	0.0771983	0.612467	0.078033	0.620429	0.0788684	0.62843	0.0797044	0.63647	0.0805411	0.64455	0.0813785	0.62078	0.079031	0.622591	0.0790784	0.62078	0.079173			0.618968	0.0796837	0.621597	0.0800452	0.607573	0.0788079	0.618897	0.0801712	0.621041	0.0804326	0.616208	0.0804838	0.623477	0.0801821	0.62187	0.0806386	0.612604	0.0789361
				0.597	0.0763725	0.604889	0.0772067	0.612817	0.0780415	0.620784	0.078877	0.628791	0.0797131	0.636837	0.0805499	0.644922	0.0813874	0.622591	0.0792207	0.624403	0.0792678	0.622591	0.0793631			0.61661	0.0795962	0.61855	0.0799773	0.605865	0.0786333	0.616396	0.0801115	0.617162	0.0803803	0.613874	0.0803716	0.621573	0.0801144	0.618942	0.0805595	0.611609	0.0788438
				0.597298	0.0763885	0.605192	0.0772229	0.613124	0.0780579	0.621096	0.0788935	0.629107	0.0797299	0.637158	0.0805668	0.645248	0.0814044	0.624403	0.0794105	0.626217	0.0794572	0.624403	0.0795532			0.614273	0.0794972	0.61553	0.0798969	0.604458	0.0784569	0.613917	0.0800412	0.613315	0.0803153	0.611559	0.0802472	0.619686	0.0800375	0.61604	0.0804674	0.610788	0.0787497
				0.59753	0.0764108	0.605427	0.0772455	0.613363	0.0780807	0.621338	0.0789166	0.629353	0.0797532	0.637408	0.0805904	0.645502	0.0814283	0.626217	0.0796003	0.628033	0.0796467	0.626217	0.0797434			0.611976	0.0793876	0.612562	0.0798047	0.60338	0.0782821	0.61148	0.079961	0.609535	0.0802381	0.609285	0.0801116	0.617831	0.079952	0.613188	0.0803632	0.610159	0.0786559
				0.597677	0.0764377	0.605576	0.0772727	0.613515	0.0781082	0.621492	0.0789445	0.629509	0.0797813	0.637566	0.0806188	0.645663	0.081457	0.628033	0.0797901	0.629851	0.0798362	0.628033	0.0799335			0.609739	0.0792682	0.609671	0.0797016	0.602651	0.0781123	0.609107	0.0798715	0.605853	0.0801493	0.607071	0.079966	0.616025	0.0798588	0.61041	0.0802477	0.609733	0.078564
				0.597727	0.076467	0.605627	0.0773023	0.613567	0.0781382	0.621545	0.0789747	0.629563	0.0798119	0.637621	0.0806498	0.645718	0.0814883	0.629851	0.07998	0.631671	0.0800257	0.629851	0.0801238			0.607581	0.0791401	0.606882	0.0795884	0.602285	0.0779507	0.606818	0.0797735	0.6023	0.0800497	0.604935	0.0798117	0.614282	0.0797585	0.60773	0.080122	0.60952	0.0784758
				ConcTikEll	ConcTikEll	ConcTikEll	ConcTikEll	ConcTikEll	ConcTikEll	ConcTikEll	ConcTikEll	ConcTikEll	ConcTikEll	ConcTikEll	ConcTikEll	ConcTikEll	ConcTikEll	0.631671	0.0801698	0.633494	0.0802153	0.631671	0.080314			0.605521	0.0790044	0.604219	0.0794661	0.60229	0.0778007	0.604632	0.0796679	0.598908	0.0799402	0.602896	0.0796499	0.612619	0.0796521	0.605171	0.0799871	0.609522	0.0783932
																		0.633494	0.0803598	0.635318	0.0804049	0.633494	0.0805043			0.603577	0.0788623	0.601704	0.0793357	0.602666	0.077665	0.602568	0.0795554	0.595705	0.0798218	0.600971	0.079482	0.611048	0.0795404	0.602755	0.0798441	0.609741	0.0783176
																		0.635318	0.0805497	0.637144	0.0805945	0.635318	0.0806946			0.601763	0.0787149	0.599359	0.0791983	0.603405	0.0775463	0.600643	0.0794372	0.592718	0.0796953	0.599177	0.0793095	0.609584	0.0794244	0.600503	0.0796943	0.610171	0.0782506
																		0.637144	0.0807397	0.638973	0.0807842	0.637144	0.0808849			0.600097	0.0785635	0.597205	0.0790552	0.604493	0.0774469	0.598875	0.0793142	0.589973	0.0795619	0.597528	0.0791339	0.608238	0.0793051	0.598433	0.079539	0.610804	0.0781935
																		0.638973	0.0809297	0.640803	0.0809739	0.638973	0.0810753			0.598593	0.0784094	0.595258	0.0789074	0.605909	0.0773688	0.597277	0.0791875	0.587493	0.0794227	0.59604	0.0789566	0.607023	0.0791835	0.596563	0.0793795	0.611629	0.0781473
																		0.640803	0.0811198	0.642635	0.0811636	0.640803	0.0812657			0.597263	0.078254	0.593537	0.0787564	0.607625	0.0773134	0.595865	0.0790581	0.585299	0.079279	0.594724	0.0787791	0.605949	0.0790607	0.59491	0.0792171	0.612628	0.078113
																		0.642635	0.0813099	0.64447	0.0813534	0.642635	0.0814562			0.596118	0.0780985	0.592055	0.0786033	0.609608	0.0772819	0.594649	0.0789271	0.583411	0.0791318	0.593592	0.078603	0.605025	0.0789377	0.593487	0.0790533	0.613783	0.0780913
																		0.64447	0.0815	0.645889	0.0815	0.643058	0.0815			0.595169	0.0779442	0.590826	0.0784496	0.611819	0.0772749	0.59364	0.0787957	0.581843	0.0789826	0.592654	0.0784298	0.604258	0.0788155	0.592306	0.0788893	0.615071	0.0780825
																		0.64447	0.0815	ConcBand	ConcBand	ConcBand	ConcBand			0.594423	0.0777926	0.589859	0.0782964	0.614215	0.0772925	0.592847	0.0786649	0.580611	0.0788326	0.591917	0.0782609	0.603655	0.0786952	0.591378	0.0787267	0.616468	0.0780869
																		IsoLine	IsoLine							0.593887	0.0776448	0.589164	0.0781451	0.61675	0.0773343	0.592276	0.078536	0.579723	0.078683	0.591388	0.0780978	0.603222	0.0785778	0.590711	0.0785669	0.617944	0.0781043
																										0.593565	0.0775022	0.588745	0.077997	0.619373	0.0773995	0.591933	0.0784099	0.579188	0.0785351	0.591071	0.0779418	0.602962	0.0784643	0.590309	0.0784111	0.619473	0.0781344
																										0.593461	0.077366	0.588607	0.0778534	0.622035	0.077487	0.59182	0.0782878	0.57901	0.0783902	0.59097	0.0777944	0.602878	0.0783557	0.590178	0.0782607	0.621025	0.0781767
																										0.593574	0.0772372	0.588751	0.0777154	0.624684	0.0775949	0.591938	0.0781708	0.579191	0.0782495	0.591084	0.0776567	0.602969	0.0782529	0.590317	0.078117	0.622568	0.0782303
																										0.593905	0.0771171	0.589175	0.0775843	0.627266	0.0777212	0.592286	0.0780597	0.57973	0.0781143	0.591414	0.07753	0.603236	0.0781568	0.590725	0.0779812	0.624073	0.0782941
																										0.59445	0.0770066	0.589876	0.0774612	0.629734	0.0778634	0.592862	0.0779556	0.580621	0.0779856	0.591955	0.0774153	0.603676	0.0780682	0.5914	0.0778545	0.625512	0.0783669
																										0.595204	0.0769068	0.590848	0.0773471	0.632038	0.0780187	0.59366	0.0778594	0.581856	0.0778646	0.592704	0.0773136	0.604285	0.0779879	0.592335	0.0777379	0.626855	0.0784474
																										0.596162	0.0768183	0.592083	0.0772431	0.634133	0.0781842	0.594674	0.0777718	0.583427	0.0777523	0.593654	0.0772258	0.605058	0.0779165	0.593522	0.0776325	0.628076	0.0785339
																										0.597315	0.0767421	0.593569	0.0771499	0.63598	0.0783566	0.595894	0.0776936	0.585318	0.0776497	0.594797	0.0771526	0.605989	0.0778547	0.594951	0.0775391	0.629153	0.0786247
																										0.598653	0.0766787	0.595295	0.0770684	0.637541	0.0785325	0.597311	0.0776255	0.587515	0.0775576	0.596124	0.0770946	0.607069	0.0778029	0.596611	0.0774586	0.630063	0.0787181
																										0.600164	0.0766287	0.597246	0.0769992	0.638787	0.0787086	0.598913	0.0775681	0.589997	0.0774768	0.597622	0.0770524	0.608289	0.0777617	0.598486	0.0773917	0.63079	0.0788123
																										0.601837	0.0765925	0.599405	0.0769431	0.639693	0.0788813	0.600685	0.0775218	0.592745	0.0774081	0.59928	0.0770262	0.60964	0.0777314	0.600561	0.0773388	0.631318	0.0789054
																										0.603656	0.0765704	0.601753	0.0769004	0.640241	0.0790474	0.602613	0.0774871	0.595734	0.0773519	0.601082	0.0770164	0.611108	0.0777122	0.602818	0.0773005	0.631638	0.0789956
																										0.605606	0.0765626	0.604271	0.0768715	0.640422	0.0792035	0.60468	0.0774642	0.598939	0.0773089	0.603015	0.077023	0.612683	0.0777043	0.605238	0.077277	0.631744	0.0790812
																										0.60767	0.0765692	0.606937	0.0768566	Black	Black	0.606868	0.0774534	0.602333	0.0772792	0.60506	0.0770459	0.61435	0.0777077	0.607801	0.0772687
																										0.609832	0.0765902	0.609728	0.076856			0.60916	0.0774546	0.605887	0.0772633	0.607201	0.077085	0.616095	0.0777225	0.610483	0.0772755
																										0.612071	0.0766252	0.612621	0.0768695			0.611534	0.0774681	0.60957	0.0772612	0.60942	0.0771399	0.617904	0.0777485	0.613264	0.0772974
																										0.61437	0.0766741	0.615591	0.0768971			0.613972	0.0774935	0.613351	0.077273	0.611697	0.0772101	0.61976	0.0777855	0.616118	0.0773342
																										0.616709	0.0767365	0.618612	0.0769386			0.616452	0.0775307	0.617198	0.0772985	0.614013	0.0772951	0.621648	0.0778332	0.619021	0.0773856
																										0.619067	0.0768117	0.621659	0.0769935			0.618953	0.0775793	0.621078	0.0773376	0.616348	0.0773941	0.623553	0.0778912	0.621949	0.0774512
																										0.621425	0.0768992	0.624705	0.0770614			0.621454	0.0776391	0.624958	0.0773899	0.618683	0.0775063	0.625457	0.0779589	0.624877	0.0775303
																										0.623762	0.0769982	0.627726	0.0771418			0.623933	0.0777093	0.628804	0.0774549	0.620997	0.0776308	0.627344	0.0780358	0.627779	0.0776224
																										0.626059	0.0771078	0.630694	0.077234			0.62637	0.0777896	0.632585	0.0775321	0.623271	0.0777664	0.629199	0.0781212	0.630631	0.0777266
																										0.628296	0.0772272	0.633585	0.0773371			0.628743	0.077879	0.636267	0.0776209	0.625486	0.0779119	0.631005	0.0782145	0.633409	0.0778421
																										0.630454	0.0773553	0.636374	0.0774503			0.631032	0.077977	0.639819	0.0777204	0.627622	0.0780663	0.632747	0.0783148	0.636089	0.0779678
																										0.632514	0.077491	0.639037	0.0775726			0.633218	0.0780827	0.643211	0.0778299	0.629661	0.0782281	0.634411	0.0784212	0.638648	0.0781027
																										0.634459	0.0776331	0.641552	0.077703			0.635282	0.0781951	0.646415	0.0779484	0.631586	0.078396	0.635982	0.0785329	0.641064	0.0782457
																										0.636272	0.0777805	0.643896	0.0778404			0.637207	0.0783133	0.649402	0.0780749	0.63338	0.0785684	0.637446	0.0786489	0.643316	0.0783955
																										0.637938	0.0779319	0.646051	0.0779835			0.638976	0.0784363	0.652147	0.0782083	0.635028	0.0787441	0.638791	0.0787681	0.645386	0.0785508
																										0.639442	0.078086	0.647997	0.0781313			0.640573	0.0785631	0.654627	0.0783474	0.636517	0.0789214	0.640006	0.0788897	0.647256	0.0787103
																										0.640773	0.0782415	0.649719	0.0782823			0.641986	0.0786925	0.65682	0.0784912	0.637833	0.0790989	0.641081	0.0790126	0.648909	0.0788727
																										0.641917	0.078397	0.6512	0.0784354			0.643202	0.0788235	0.658709	0.0786383	0.638965	0.079275	0.642005	0.0791356	0.650332	0.0790365
																										0.642867	0.0785512	0.65243	0.0785891			0.644211	0.0789549	0.660276	0.0787875	0.639903	0.0794482	0.642772	0.0792578	0.651513	0.0792005
																										0.643612	0.0787028	0.653396	0.0787423			0.645004	0.0790856	0.661509	0.0789376	0.64064	0.0796171	0.643374	0.0793781	0.652441	0.0793631
																										0.644148	0.0788506	0.654092	0.0788936			0.645575	0.0792146	0.662396	0.0790872	0.641169	0.0797802	0.643807	0.0794955	0.653108	0.0795229
																										0.64447	0.0789932	0.65451	0.0790417			0.645918	0.0793406	0.662931	0.0792351	0.641485	0.0799362	0.644067	0.079609	0.65351	0.0796788
																										0.644574	0.0791295	0.654649	0.0791853			0.646031	0.0794627	0.663109	0.07938	0.641587	0.0800836	0.644152	0.0797176	0.653642	0.0798291
																										Black	Black	Black	Black			Black	Black	Black	Black	Black	Black	Black	Black	Black	Black

## Sheet: PlotDat7
Source sheet	Hoja1	0.618925	0.0788753	0.597727	0.076467	0.605627	0.0773023	0.613567	0.0781382	0.621545	0.0789747	0.629563	0.0798119	0.637621	0.0806498	0.645718	0.0814883	0.653855	0.0823274	0.592092	0.076	0.593376	0.076	0.590814	0.076	0.588642	0.0756324	0.646031	0.0794627	0.663109	0.07938	0.641587	0.0800836	0.644152	0.0797176	0.653642	0.0798291	0.654935	0.0799367	0.644112	0.0799724	0.651221	0.080295	0.641953	0.079931	0.642821	0.0804015	0.665387	0.0802867
Plot name	Concordia6	0.62106	0.0788851	0.597677	0.0764963	0.605576	0.0773318	0.613515	0.0781681	0.621492	0.079005	0.629509	0.0798425	0.637566	0.0806807	0.645663	0.0815195	0.653799	0.082359	0.592092	0.076	0.594354	0.0761038	0.592092	0.0761364	0.596484	0.076467	0.645763	0.0796373	0.662928	0.0795206	0.641472	0.0802212	0.643946	0.0798703	0.653503	0.0799729	0.654811	0.0800645	0.643919	0.080119	0.651107	0.080428	0.641727	0.0800826	0.642643	0.0805435	0.665234	0.0804324
Plot Type	1	0.616278	0.078939	0.59753	0.0765231	0.605427	0.077359	0.613363	0.0781956	0.621338	0.0790328	0.629353	0.0798706	0.637408	0.0807091	0.645502	0.0815483	0.653636	0.0823881	0.594354	0.0762406	0.596619	0.076344	0.594354	0.0763775	0.604365	0.0773023	0.644973	0.0797971	0.66239	0.0796559	0.641143	0.080348	0.643342	0.0800069	0.653094	0.0801086	0.654449	0.0801851	0.643354	0.0802491	0.650779	0.0805512	0.641059	0.080221	0.642126	0.0806665	0.664784	0.0805709
1st free col	77	0.623515	0.0790366	0.597298	0.0765455	0.605192	0.0773816	0.613124	0.0782184	0.621096	0.0790559	0.629107	0.079894	0.637158	0.0807327	0.645248	0.0815721	0.653379	0.0824122	0.596619	0.0764813	0.598887	0.0765843	0.596619	0.0766186	0.612285	0.0781382	0.643676	0.079939	0.661499	0.0797846	0.640601	0.0804627	0.642352	0.0801246	0.652419	0.0802354	0.65385	0.0802977	0.642429	0.0803603	0.650238	0.0806636	0.639963	0.0803435	0.64128	0.0807682	0.664038	0.080701
Sigma Level	2	0.62191	0.0790449	0.597	0.0765615	0.604889	0.0773978	0.612817	0.0782348	0.620784	0.0790724	0.628791	0.0799107	0.636837	0.0807496	0.644922	0.0815892	0.653048	0.0824294	0.598887	0.076722	0.601158	0.0768246	0.598887	0.0768598	0.620244	0.0789747	0.641897	0.0800602	0.660263	0.0799056	0.639852	0.0805644	0.640996	0.0802211	0.651485	0.0803519	0.65302	0.0804011	0.641161	0.0804504	0.64949	0.0807641	0.63846	0.0804477	0.640122	0.0808465	0.663005	0.0808217
Absolute Errs	FALSE	0.626771	0.0792301	0.596661	0.0765698	0.604545	0.0774062	0.612467	0.0782433	0.620429	0.079081	0.62843	0.0799194	0.63647	0.0807584	0.64455	0.0815981	0.652671	0.0824384	0.601158	0.0769628	0.603433	0.077065	0.601158	0.077101	0.628242	0.0798119	0.639671	0.0801583	0.658693	0.0800179	0.638902	0.0806522	0.639299	0.0802945	0.650297	0.0804573	0.651966	0.0804945	0.639575	0.0805176	0.64854	0.0808519	0.63658	0.0805315	0.638674	0.0809	0.661693	0.0809318
Symbol Type	1	0.624829	0.0792755	0.596307	0.0765698	0.604185	0.0774062	0.612102	0.0782433	0.620058	0.079081	0.628054	0.0799194	0.636089	0.0807584	0.644163	0.0815981	0.652277	0.0824384	0.603433	0.0772037	0.605711	0.0773055	0.603433	0.0773423	0.636279	0.0806498	0.637042	0.0802314	0.656801	0.0801205	0.637759	0.0807254	0.637296	0.0803435	0.648868	0.0805507	0.650698	0.0805771	0.637702	0.0805606	0.647398	0.0809262	0.634358	0.0805933	0.636964	0.0809275	0.660112	0.0810306
Inverse Plot	FALSE	0.625908	0.0792759	0.595968	0.0765615	0.603841	0.0773978	0.611752	0.0782348	0.619703	0.0790724	0.627693	0.0799107	0.635722	0.0807496	0.643791	0.0815892	0.6519	0.0824294	0.605711	0.0774446	0.607992	0.077546	0.605711	0.0775836	0.644357	0.0814883	0.634059	0.0802781	0.654605	0.0802126	0.636433	0.0807834	0.635024	0.080367	0.647208	0.0806312	0.649225	0.0806483	0.635579	0.0805786	0.646072	0.0809865	0.631838	0.080632	0.635026	0.0809285	0.658277	0.081117
Color Plot	FALSE	0.619055	0.0794024	0.59567	0.0765455	0.603538	0.0773816	0.611445	0.0782184	0.619391	0.0790559	0.627377	0.079894	0.635401	0.0807327	0.643465	0.0815721	0.651569	0.0824122	0.607992	0.0776855	0.610276	0.0777865	0.607992	0.077825	0.652474	0.0823274	0.630782	0.0802975	0.652122	0.0802933	0.634934	0.0808256	0.632527	0.0803647	0.645333	0.0806982	0.64756	0.0807073	0.633246	0.0805713	0.644574	0.0810322	0.62907	0.0806467	0.632897	0.0809031	0.656204	0.0811904
3D plot	FALSE	0.625233	0.0795684	0.595438	0.0765231	0.603303	0.077359	0.611206	0.0781956	0.619149	0.0790328	0.62713	0.0798706	0.635151	0.0807091	0.643212	0.0815483	0.651312	0.0823881	0.610276	0.0779265	0.612564	0.0780271	0.610276	0.0780665	IsoLine	IsoLine	0.627275	0.0802893	0.649375	0.0803621	0.633277	0.0808518	0.629856	0.0803365	0.643258	0.080751	0.645719	0.0807538	0.63075	0.0805387	0.642917	0.0810629	0.626106	0.0806372	0.63062	0.0808517	0.653909	0.0812501
Linear	FALSE	0.630282	0.0795902	0.595291	0.0764963	0.603154	0.0773318	0.611055	0.0781681	0.618995	0.079005	0.626974	0.0798425	0.634993	0.0806807	0.643051	0.0815195	0.651148	0.082359	0.612564	0.0781676	0.614855	0.0782678	0.612564	0.078308			0.623604	0.0802535	0.646386	0.0804182	0.631474	0.0808616	0.627061	0.0802829	0.641001	0.0807893	0.643715	0.0807872	0.628138	0.0804815	0.641115	0.0810783	0.623006	0.0806037	0.628237	0.0807754	0.651412	0.0812957
Data Range	H22:L49	0.632145	0.0796386	0.595241	0.076467	0.603103	0.0773023	0.611003	0.0781382	0.618942	0.0789747	0.626921	0.0798119	0.634938	0.0806498	0.642995	0.0814883	0.651092	0.0823274	0.614855	0.0784087	0.617149	0.0785085	0.614855	0.0785495			0.619843	0.0801909	0.64318	0.0804613	0.629542	0.080855	0.624197	0.0802052	0.638581	0.0808128	0.641567	0.0808074	0.625462	0.0804009	0.639183	0.0810784	0.619828	0.0805468	0.625796	0.0806755	0.648735	0.0813267
Filled Symbols	FALSE	0.624767	0.0796921	0.595291	0.0764377	0.603154	0.0772727	0.611055	0.0781082	0.618995	0.0789445	0.626974	0.0797813	0.634993	0.0806188	0.643051	0.081457	0.651148	0.0822958	0.617149	0.0786498	0.619446	0.0787493	0.617149	0.0787911			0.616064	0.0801027	0.639786	0.0804909	0.627497	0.0808321	0.62132	0.0801047	0.636018	0.0808211	0.639293	0.0808141	0.622773	0.0802984	0.637137	0.0810631	0.616636	0.0804676	0.623344	0.0805541	0.645901	0.0813429
ConcAge	TRUE	0.623625	0.079765	0.595438	0.0764108	0.603303	0.0772455	0.611206	0.0780807	0.619149	0.0789166	0.62713	0.0797532	0.635151	0.0805904	0.643212	0.0814283	0.651312	0.0822668	0.619446	0.078891	0.621747	0.0789901	0.619446	0.0790328			0.612341	0.0799906	0.636233	0.0805068	0.625356	0.080793	0.618486	0.0799833	0.633336	0.0808143	0.636912	0.0808073	0.620125	0.0801759	0.634996	0.0810326	0.61349	0.0803677	0.620928	0.0804135	0.642934	0.0813442
ConcSwap	FALSE	0.628156	0.0797889	0.59567	0.0763885	0.603538	0.0772229	0.611445	0.0780579	0.619391	0.0788935	0.627377	0.0797299	0.635401	0.0805668	0.643465	0.0814044	0.651569	0.0822427	0.621747	0.0791323	0.624051	0.079231	0.621747	0.0792745			0.608745	0.0798568	0.63255	0.0805089	0.623137	0.0807381	0.615749	0.0798436	0.630556	0.0807924	0.634444	0.080787	0.617568	0.080036	0.632778	0.080987	0.610453	0.080249	0.618597	0.0802565	0.639859	0.0813305
1st Symbol-row	1	0.628248	0.0797936	0.595968	0.0763725	0.603841	0.0772067	0.611752	0.0780415	0.619703	0.078877	0.627693	0.0797131	0.635722	0.0805499	0.643791	0.0813874	0.6519	0.0822254	0.624051	0.0793736	0.626358	0.0794719	0.624051	0.0795163			0.605348	0.0797039	0.628768	0.0804971	0.62086	0.0806679	0.613164	0.0796882	0.627702	0.0807556	0.631911	0.0807535	0.615152	0.0798812	0.630501	0.0809269	0.607584	0.0801138	0.616395	0.080086	0.636701	0.0813019
		0.627327	0.0798306	0.596307	0.0763642	0.604185	0.0771983	0.612102	0.078033	0.620058	0.0788684	0.628054	0.0797044	0.636089	0.0805411	0.644163	0.0813785	0.652277	0.0822164	0.626358	0.079615	0.628668	0.0797129	0.626358	0.0797581			0.602215	0.0795348	0.624921	0.0804716	0.618544	0.0805829	0.61078	0.0795201	0.624798	0.0807042	0.629334	0.0807069	0.612925	0.0797147	0.628184	0.0808527	0.604937	0.0799647	0.614364	0.0799055	0.63349	0.0812588
		0.633005	0.0799559	0.596661	0.0763642	0.604545	0.0771983	0.612467	0.078033	0.620429	0.0788684	0.62843	0.0797044	0.63647	0.0805411	0.64455	0.0813785	0.652671	0.0822164	0.628668	0.0798565	0.630982	0.0799539	0.628668	0.08			0.599408	0.0793529	0.621041	0.0804326	0.616208	0.0804838	0.608644	0.0793425	0.62187	0.0806386	0.626736	0.0806478	0.61093	0.0795396	0.625848	0.080765	0.602565	0.0798048	0.612546	0.0797185	0.63025	0.0812014
		0.636358	0.0799581	0.597	0.0763725	0.604889	0.0772067	0.612817	0.0780415	0.620784	0.078877	0.628791	0.0797131	0.636837	0.0805499	0.644922	0.0813874	0.653048	0.0822254	0.630982	0.0800979	0.633299	0.080195	0.630982	0.080242			0.59698	0.0791618	0.617162	0.0803803	0.613874	0.0803716	0.606797	0.079159	0.618942	0.0805595	0.624137	0.0805766	0.609205	0.0793593	0.623513	0.0806646	0.600515	0.079637	0.610974	0.0795285	0.627011	0.0811303
		0.637365	0.0800366	0.597298	0.0763885	0.605192	0.0772229	0.613124	0.0780579	0.621096	0.0788935	0.629107	0.0797299	0.637158	0.0805668	0.645248	0.0814044	0.653379	0.0822427	0.633299	0.0803395	0.635619	0.0804362	0.633299	0.0804839			0.594979	0.078965	0.613315	0.0803153	0.611559	0.0802472	0.605276	0.0789732	0.61604	0.0804674	0.621561	0.0804938	0.607784	0.0791774	0.621198	0.0805524	0.598825	0.0794646	0.60968	0.0793392	0.6238	0.081046
		0.628081	0.0801276	0.59753	0.0764108	0.605427	0.0772455	0.613363	0.0780807	0.621338	0.0789166	0.629353	0.0797532	0.637408	0.0805904	0.645502	0.0814283	0.653636	0.0822668	0.635619	0.0805811	0.637943	0.0806774	0.635619	0.080726			0.593445	0.0787665	0.609535	0.0802381	0.609285	0.0801116	0.60411	0.0787885	0.613188	0.0803632	0.61903	0.0804003	0.606695	0.0789975	0.618924	0.0804293	0.597529	0.079291	0.608688	0.0791545	0.620645	0.0809493
		0.626609	0.0801291	0.597677	0.0764377	0.605576	0.0772727	0.613515	0.0781082	0.621492	0.0789445	0.629509	0.0797813	0.637566	0.0806188	0.645663	0.081457	0.653799	0.0822958	0.637943	0.0808227	0.64027	0.0809186	0.637943	0.0809681			0.592406	0.0785701	0.605853	0.0801493	0.607071	0.079966	0.603321	0.0786087	0.61041	0.0802477	0.616564	0.0802968	0.605958	0.0788229	0.616709	0.0802963	0.596652	0.0791196	0.608019	0.0789778	0.617571	0.080841
		0.632076	0.0801368	0.597727	0.076467	0.605627	0.0773023	0.613567	0.0781382	0.621545	0.0789747	0.629563	0.0798119	0.637621	0.0806498	0.645718	0.0814883	0.653855	0.0823274	0.64027	0.0810644	0.6426	0.0811599	0.64027	0.0812102			0.591884	0.0783797	0.6023	0.0800497	0.604935	0.0798117	0.602926	0.0784373	0.60773	0.080122	0.614186	0.0801842	0.605589	0.0786572	0.614572	0.0801547	0.596211	0.0789537	0.607684	0.0788126	0.614606	0.080722
		IsoLine	IsoLine	ConcTikEll	ConcTikEll	ConcTikEll	ConcTikEll	ConcTikEll	ConcTikEll	ConcTikEll	ConcTikEll	ConcTikEll	ConcTikEll	ConcTikEll	ConcTikEll	ConcTikEll	ConcTikEll	ConcTikEll	ConcTikEll	0.6426	0.0813062	0.644933	0.0814013	0.6426	0.0814525			0.591888	0.0781989	0.598908	0.0799402	0.602896	0.0796499	0.602931	0.0782775	0.605171	0.0799871	0.611915	0.0800635	0.605595	0.0785035	0.612532	0.0800055	0.596215	0.0787965	0.607691	0.0786621	0.611775	0.0805934
																				0.644933	0.081548	0.64727	0.0816427	0.644933	0.0816947			0.592418	0.0780312	0.595705	0.0798218	0.600971	0.079482	0.603337	0.0781324	0.602755	0.0798441	0.60977	0.0799356	0.605975	0.0783648	0.610606	0.0798501	0.596663	0.0786511	0.60804	0.0785292	0.609101	0.0804562
																				0.64727	0.0817899	0.64961	0.0818842	0.64727	0.081937			0.593464	0.07788	0.592718	0.0796953	0.599177	0.0793095	0.604135	0.078005	0.600503	0.0796943	0.607771	0.0798018	0.606722	0.0782439	0.608811	0.0796898	0.597547	0.0785203	0.608723	0.0784166	0.606609	0.0803117
																				0.64961	0.0820318	0.651954	0.0821257	0.64961	0.0821794			0.595006	0.0777482	0.589973	0.0795619	0.597528	0.0791339	0.605311	0.0778976	0.598433	0.079539	0.605934	0.079663	0.607821	0.078143	0.607162	0.079526	0.598849	0.0784067	0.609728	0.0783264	0.604318	0.080161
																				0.651954	0.0822738	0.6543	0.0823673	0.651954	0.0824218			0.597013	0.0776383	0.587493	0.0794227	0.59604	0.0789566	0.606841	0.0778125	0.596563	0.0793795	0.604275	0.0795206	0.609251	0.0780642	0.605672	0.0793601	0.600545	0.0783125	0.611034	0.0782603	0.602249	0.0800054
																				0.6543	0.0825158	0.656651	0.0826089	0.6543	0.0826643			0.599447	0.0775525	0.585299	0.079279	0.594724	0.0787791	0.608696	0.0777511	0.59491	0.0792171	0.602807	0.0793757	0.610985	0.0780089	0.604356	0.0791934	0.602602	0.0782395	0.612617	0.0782198	0.600419	0.0798462
																				0.656651	0.0827579	0.659004	0.0828506	0.656651	0.0829068			0.602259	0.0774924	0.583411	0.0791318	0.593592	0.078603	0.610839	0.0777148	0.593487	0.0790533	0.601544	0.0792295	0.612988	0.0779783	0.603223	0.0790275	0.604978	0.0781891	0.614445	0.0782054	0.598844	0.0796849
																				0.659004	0.083	0.660461	0.083	0.657554	0.083			0.605397	0.0774592	0.581843	0.0789826	0.592654	0.0784298	0.613229	0.0777042	0.592306	0.0788893	0.600497	0.0790834	0.615221	0.077973	0.602284	0.0788636	0.607629	0.0781624	0.616483	0.0782176	0.597537	0.0795228
																				0.659004	0.083	ConcBand	ConcBand	ConcBand	ConcBand			0.608797	0.0774537	0.580611	0.0788326	0.591917	0.0782609	0.615819	0.0777195	0.591378	0.0787267	0.599673	0.0789385	0.617642	0.077993	0.601546	0.0787033	0.610501	0.0781598	0.618692	0.0782561	0.596509	0.0793613
																				IsoLine	IsoLine							0.612395	0.0774757	0.579723	0.078683	0.591388	0.0780978	0.618559	0.0777605	0.590711	0.0785669	0.599081	0.0787961	0.620202	0.078038	0.601016	0.0785479	0.613541	0.0781813	0.621028	0.0783201	0.595769	0.0792017
																												0.61612	0.077525	0.579188	0.0785351	0.591071	0.0779418	0.621395	0.0778263	0.590309	0.0784111	0.598724	0.0786574	0.622852	0.078107	0.600698	0.0783986	0.616688	0.0782267	0.623445	0.0784085	0.595324	0.0790454
																												0.619899	0.0776006	0.57901	0.0783902	0.59097	0.0777944	0.624273	0.0779156	0.590178	0.0782607	0.598608	0.0785235	0.625541	0.0781988	0.600596	0.0782569	0.61988	0.0782949	0.625898	0.0785194	0.595178	0.0788937
																												0.62366	0.077701	0.579191	0.0782495	0.591084	0.0776567	0.627136	0.0780268	0.590317	0.078117	0.598731	0.0783957	0.628216	0.0783116	0.600709	0.0781238	0.623057	0.0783846	0.628338	0.0786507	0.59533	0.0787481
																												0.627328	0.0778243	0.57973	0.0781143	0.591414	0.07753	0.629928	0.0781576	0.590725	0.0779812	0.599094	0.0782751	0.630825	0.0784431	0.601038	0.0780006	0.626156	0.0784942	0.630717	0.0787999	0.595781	0.0786096
																												0.630833	0.077968	0.580621	0.0779856	0.591955	0.0774153	0.632595	0.0783056	0.5914	0.0778545	0.599692	0.0781625	0.633318	0.0785908	0.601579	0.0778883	0.629117	0.0786215	0.632989	0.078964	0.596526	0.0784794
																												0.634106	0.0781294	0.581856	0.0778646	0.592704	0.0773136	0.635086	0.0784678	0.592335	0.0777379	0.600522	0.0780591	0.635645	0.0787519	0.602327	0.0777878	0.631881	0.0787639	0.635111	0.0791399	0.59756	0.0783588
																												0.637083	0.0783053	0.583427	0.0777523	0.593654	0.0772258	0.637352	0.078641	0.593522	0.0776325	0.601576	0.0779657	0.637761	0.0789231	0.603276	0.0777	0.634396	0.0789188	0.63704	0.0793242	0.598872	0.0782486
																												0.639707	0.0784922	0.585318	0.0776497	0.594797	0.0771526	0.639348	0.078822	0.594951	0.0775391	0.602845	0.077883	0.639626	0.0791012	0.604419	0.0776256	0.636613	0.0790831	0.638739	0.0795132	0.600452	0.0781499
																												0.641927	0.0786867	0.587515	0.0775576	0.596124	0.0770946	0.641036	0.0790071	0.596611	0.0774586	0.604318	0.0778119	0.641203	0.0792827	0.605745	0.0775654	0.638488	0.0792536	0.640176	0.0797032	0.602287	0.0780635
																												0.643699	0.0788848	0.589997	0.0774768	0.597622	0.0770524	0.642383	0.0791928	0.598486	0.0773917	0.605982	0.0777528	0.642461	0.0794641	0.607243	0.0775197	0.639984	0.079427	0.641321	0.0798907	0.604361	0.0779901
																												0.644989	0.0790827	0.592745	0.0774081	0.59928	0.0770262	0.643363	0.0793754	0.600561	0.0773388	0.607824	0.0777064	0.643376	0.0796418	0.6089	0.077489	0.641074	0.0795999	0.642154	0.0800718	0.606656	0.0779303
																												0.645771	0.0792766	0.595734	0.0773519	0.601082	0.0770164	0.643956	0.0795515	0.602818	0.0773005	0.609827	0.0776729	0.64393	0.0798123	0.610702	0.0774735	0.641734	0.079769	0.642657	0.0802432	0.609153	0.0778848
																												0.646031	0.0794627	0.598939	0.0773089	0.603015	0.077023	0.644152	0.0797176	0.605238	0.077277	0.611975	0.0776528	0.644112	0.0799724	0.612634	0.0774734	0.641953	0.079931	0.642821	0.0804015	0.611829	0.0778537
																												Black	Black	0.602333	0.0772792	0.60506	0.0770459	Black	Black	0.607801	0.0772687	0.614249	0.0776461	Black	Black	0.614679	0.0774888	Black	Black	Black	Black	0.614663	0.0778375
																														0.605887	0.0772633	0.607201	0.077085			0.610483	0.0772755	0.61663	0.0776529			0.61682	0.0775193					0.617631	0.0778363
																														0.60957	0.0772612	0.60942	0.0771399			0.613264	0.0772974	0.619098	0.0776731			0.619039	0.0775648					0.620706	0.07785
																														0.613351	0.077273	0.611697	0.0772101			0.616118	0.0773342	0.621631	0.0777067			0.621316	0.077625					0.623863	0.0778785
																														0.617198	0.0772985	0.614013	0.0772951			0.619021	0.0773856	0.624208	0.0777532			0.623632	0.0776992					0.627075	0.0779217
																														0.621078	0.0773376	0.616348	0.0773941			0.621949	0.0774512	0.626807	0.0778124			0.625968	0.0777869					0.630314	0.0779791
																														0.624958	0.0773899	0.618683	0.0775063			0.624877	0.0775303	0.629405	0.0778836			0.628304	0.0778872					0.633553	0.0780502
																														0.628804	0.0774549	0.620997	0.0776308			0.627779	0.0776224	0.631981	0.0779664			0.630618	0.0779995					0.636764	0.0781345
																														0.632585	0.0775321	0.623271	0.0777664			0.630631	0.0777266	0.634513	0.0780599			0.632893	0.0781226					0.63992	0.0782312
																														0.636267	0.0776209	0.625486	0.0779119			0.633409	0.0778421	0.636978	0.0781634			0.635108	0.0782555					0.642994	0.0783395
																														0.639819	0.0777204	0.627622	0.0780663			0.636089	0.0779678	0.639357	0.078276			0.637245	0.0783972					0.645959	0.0784584
																														0.643211	0.0778299	0.629661	0.0782281			0.638648	0.0781027	0.641628	0.0783967			0.639285	0.0785464					0.64879	0.078587
																														0.646415	0.0779484	0.631586	0.078396			0.641064	0.0782457	0.643772	0.0785245			0.64121	0.0787017					0.651463	0.0787242
																														0.649402	0.0780749	0.63338	0.0785684			0.643316	0.0783955	0.645771	0.0786584			0.643005	0.078862					0.653956	0.0788688
																														0.652147	0.0782083	0.635028	0.0787441			0.645386	0.0785508	0.647608	0.0787971			0.644655	0.0790258					0.656247	0.0790195
																														0.654627	0.0783474	0.636517	0.0789214			0.647256	0.0787103	0.649268	0.0789396			0.646144	0.0791918					0.658316	0.0791751
																														0.65682	0.0784912	0.637833	0.0790989			0.648909	0.0788727	0.650735	0.0790845			0.647461	0.0793584					0.660146	0.0793342
																														0.658709	0.0786383	0.638965	0.079275			0.650332	0.0790365	0.651998	0.0792307			0.648594	0.0795244					0.661721	0.0794955
																														0.660276	0.0787875	0.639903	0.0794482			0.651513	0.0792005	0.653046	0.0793768			0.649533	0.0796882					0.663028	0.0796577
																														0.661509	0.0789376	0.64064	0.0796171			0.652441	0.0793631	0.653869	0.0795217			0.650271	0.0798486					0.664056	0.0798192
																														0.662396	0.0790872	0.641169	0.0797802			0.653108	0.0795229	0.654462	0.0796641			0.650801	0.080004					0.664795	0.0799788
																														0.662931	0.0792351	0.641485	0.0799362			0.65351	0.0796788	0.654818	0.0798028			0.651118	0.0801532					0.66524	0.0801351
																														0.663109	0.07938	0.641587	0.0800836			0.653642	0.0798291	0.654935	0.0799367			0.651221	0.080295					0.665387	0.0802867
																														Black	Black	Black	Black			Black	Black	Black	Black			Black	Black					Black	Black
[truncated: 26 more columns]

## Sheet: PlotDat6
Source sheet	Hoja1	0.618925	0.0788753	0.597727	0.076467	0.605627	0.0773023	0.613567	0.0781382	0.621545	0.0789747	0.629563	0.0798119	0.637621	0.0806498	0.645718	0.0814883	0.653855	0.0823274	0.592092	0.076	0.593376	0.076	0.590814	0.076	0.588642	0.0756324	0.646031	0.0794627	0.663109	0.07938	0.641587	0.0800836	0.644152	0.0797176	0.653642	0.0798291	0.654935	0.0799367	0.644112	0.0799724	0.651221	0.080295	0.641953	0.079931	0.642821	0.0804015	0.665387	0.0802867
Plot name	Concordia7	0.62106	0.0788851	0.597677	0.0764963	0.605576	0.0773318	0.613515	0.0781681	0.621492	0.079005	0.629509	0.0798425	0.637566	0.0806807	0.645663	0.0815195	0.653799	0.082359	0.592092	0.076	0.594354	0.0761038	0.592092	0.0761364	0.596484	0.076467	0.645763	0.0796373	0.662928	0.0795206	0.641331	0.0802875	0.643946	0.0798703	0.653327	0.0800433	0.654656	0.0801271	0.643919	0.080119	0.650966	0.0804923	0.641727	0.0800826	0.642573	0.0805677	0.665041	0.0805042
Plot Type	1	0.616278	0.078939	0.59753	0.0765231	0.605427	0.077359	0.613363	0.0781956	0.621338	0.0790328	0.629353	0.0798706	0.637408	0.0807091	0.645502	0.0815483	0.653636	0.0823881	0.594354	0.0762406	0.596619	0.076344	0.594354	0.0763775	0.604365	0.0773023	0.644973	0.0797971	0.66239	0.0796559	0.640587	0.0804651	0.643342	0.0800069	0.652401	0.0802381	0.653834	0.0803001	0.643354	0.0802491	0.650224	0.0806659	0.641059	0.080221	0.641852	0.0807066	0.664018	0.0807038
1st free col	87	0.623515	0.0790366	0.597298	0.0765455	0.605192	0.0773816	0.613124	0.0782184	0.621096	0.0790559	0.629107	0.079894	0.637158	0.0807327	0.645248	0.0815721	0.653379	0.0824122	0.596619	0.0764813	0.598887	0.0765843	0.596619	0.0766186	0.612285	0.0781382	0.643676	0.079939	0.661499	0.0797846	0.63937	0.080613	0.642352	0.0801246	0.650882	0.0804096	0.652486	0.0804522	0.642429	0.0803603	0.649008	0.0808125	0.639963	0.0803435	0.640677	0.0808145	0.662339	0.0808818
Sigma Level	2	0.62191	0.0790449	0.597	0.0765615	0.604889	0.0773978	0.612817	0.0782348	0.620784	0.0790724	0.628791	0.0799107	0.636837	0.0807496	0.644922	0.0815892	0.653048	0.0824294	0.598887	0.076722	0.601158	0.0768246	0.598887	0.0768598	0.620244	0.0789747	0.641897	0.0800602	0.660263	0.0799056	0.637704	0.0807283	0.640996	0.0802211	0.648799	0.0805545	0.650636	0.0805806	0.641161	0.0804504	0.647343	0.0809292	0.63846	0.0804477	0.639081	0.0808884	0.660036	0.0810347
Absolute Errs	FALSE	0.626771	0.0792301	0.596661	0.0765698	0.604545	0.0774062	0.612467	0.0782433	0.620429	0.079081	0.62843	0.0799194	0.63647	0.0807584	0.64455	0.0815981	0.652671	0.0824384	0.601158	0.0769628	0.603433	0.077065	0.601158	0.077101	0.628242	0.0798119	0.639671	0.0801583	0.658693	0.0800179	0.635621	0.0808088	0.639299	0.0802945	0.646192	0.0806701	0.648323	0.0806826	0.639575	0.0805176	0.64526	0.0810137	0.63658	0.0805315	0.637108	0.0809263	0.657154	0.0811594
Symbol Type	1	0.624829	0.0792755	0.596307	0.0765698	0.604185	0.0774062	0.612102	0.0782433	0.620058	0.079081	0.628054	0.0799194	0.636089	0.0807584	0.644163	0.0815981	0.652277	0.0824384	0.603433	0.0772037	0.605711	0.0773055	0.603433	0.0773423	0.636279	0.0806498	0.637042	0.0802314	0.656801	0.0801205	0.633161	0.0808529	0.637296	0.0803435	0.643113	0.080754	0.64559	0.0807564	0.637702	0.0805606	0.642801	0.0810644	0.634358	0.0805933	0.63481	0.0809271	0.653748	0.0812536
Inverse Plot	FALSE	0.625908	0.0792759	0.595968	0.0765615	0.603841	0.0773978	0.611752	0.0782348	0.619703	0.0790724	0.627693	0.0799107	0.635722	0.0807496	0.643791	0.0815892	0.6519	0.0824294	0.605711	0.0774446	0.607992	0.077546	0.605711	0.0775836	0.644357	0.0814883	0.634059	0.0802781	0.654605	0.0802126	0.630373	0.0808598	0.635024	0.080367	0.639621	0.0808047	0.642491	0.0808005	0.635579	0.0805786	0.640013	0.0810803	0.631838	0.080632	0.632251	0.0808909	0.649886	0.0813154
Color Plot	FALSE	0.619055	0.0794024	0.59567	0.0765455	0.603538	0.0773816	0.611445	0.0782184	0.619391	0.0790559	0.627377	0.079894	0.635401	0.0807327	0.643465	0.0815721	0.651569	0.0824122	0.607992	0.0776855	0.610276	0.0777865	0.607992	0.077825	0.652474	0.0823274	0.630782	0.0802975	0.652122	0.0802933	0.62731	0.0808293	0.632527	0.0803647	0.635785	0.0808211	0.639085	0.0808141	0.633246	0.0805713	0.636951	0.081061	0.62907	0.0806467	0.629501	0.0808186	0.645643	0.0813436
3D plot	FALSE	0.625233	0.0795684	0.595438	0.0765231	0.603303	0.077359	0.611206	0.0781956	0.619149	0.0790328	0.62713	0.0798706	0.635151	0.0807091	0.643212	0.0815483	0.651312	0.0823881	0.610276	0.0779265	0.612564	0.0780271	0.610276	0.0780665	IsoLine	IsoLine	0.627275	0.0802893	0.649375	0.0803621	0.624033	0.0807619	0.629856	0.0803365	0.631678	0.080803	0.63544	0.0807967	0.63075	0.0805387	0.633673	0.081007	0.626106	0.0806372	0.626635	0.0807122	0.6411	0.0813378
Linear	FALSE	0.630282	0.0795902	0.595291	0.0764963	0.603154	0.0773318	0.611055	0.0781681	0.618995	0.079005	0.626974	0.0798425	0.634993	0.0806807	0.643051	0.0815195	0.651148	0.082359	0.612564	0.0781676	0.614855	0.0782678	0.612564	0.078308			0.623604	0.0802535	0.646386	0.0804182	0.620604	0.0806591	0.627061	0.0802829	0.627381	0.0807506	0.631627	0.080749	0.628138	0.0804815	0.630245	0.0809193	0.623006	0.0806037	0.62373	0.0805746	0.636347	0.0812979
Data Range	H22:L54	0.632145	0.0796386	0.595241	0.076467	0.603103	0.0773023	0.611003	0.0781382	0.618942	0.0789747	0.626921	0.0798119	0.634938	0.0806498	0.642995	0.0814883	0.651092	0.0823274	0.614855	0.0784087	0.617149	0.0785085	0.614855	0.0785495			0.619843	0.0801909	0.64318	0.0804613	0.617092	0.0805228	0.624197	0.0802052	0.622978	0.080665	0.627719	0.0806716	0.625462	0.0804009	0.626732	0.0807996	0.619828	0.0805468	0.620866	0.0804096	0.631476	0.0812247
Filled Symbols	FALSE	0.624767	0.0796921	0.595291	0.0764377	0.603154	0.0772727	0.611055	0.0781082	0.618995	0.0789445	0.626974	0.0797813	0.634993	0.0806188	0.643051	0.081457	0.651148	0.0822958	0.617149	0.0786498	0.619446	0.0787493	0.617149	0.0787911			0.616064	0.0801027	0.639786	0.0804909	0.613563	0.0803557	0.62132	0.0801047	0.618553	0.0805479	0.623792	0.0805662	0.622773	0.0802984	0.623203	0.0806503	0.616636	0.0804676	0.618121	0.0802216	0.626581	0.0811198
ConcAge	TRUE	0.623625	0.079765	0.595438	0.0764108	0.603303	0.0772455	0.611206	0.0780807	0.619149	0.0789166	0.62713	0.0797532	0.635151	0.0805904	0.643212	0.0814283	0.651312	0.0822668	0.619446	0.078891	0.621747	0.0789901	0.619446	0.0790328			0.612341	0.0799906	0.636233	0.0805068	0.610088	0.0801611	0.618486	0.0799833	0.614195	0.0804016	0.619923	0.0804347	0.620125	0.0801759	0.619727	0.0804742	0.61349	0.0803677	0.61557	0.0800158	0.621759	0.080985
ConcSwap	FALSE	0.628156	0.0797889	0.59567	0.0763885	0.603538	0.0772229	0.611445	0.0780579	0.619391	0.0788935	0.627377	0.0797299	0.635401	0.0805668	0.643465	0.0814044	0.651569	0.0822427	0.621747	0.0791323	0.624051	0.079231	0.621747	0.0792745			0.608745	0.0798568	0.63255	0.0805089	0.606733	0.0799426	0.615749	0.0798436	0.609986	0.0802288	0.616188	0.0802799	0.617568	0.080036	0.616371	0.0802748	0.610453	0.080249	0.613283	0.0797978	0.617102	0.0808232
1st Symbol-row	1	0.628248	0.0797936	0.595968	0.0763725	0.603841	0.0772067	0.611752	0.0780415	0.619703	0.078877	0.627693	0.0797131	0.635722	0.0805499	0.643791	0.0813874	0.6519	0.0822254	0.624051	0.0793736	0.626358	0.0794719	0.624051	0.0795163			0.605348	0.0797039	0.628768	0.0804971	0.603564	0.0797046	0.613164	0.0796882	0.606009	0.080033	0.612659	0.0801046	0.615152	0.0798812	0.6132	0.080056	0.607584	0.0801138	0.611322	0.0795735	0.612702	0.0806373
		0.627327	0.0798306	0.596307	0.0763642	0.604185	0.0771983	0.612102	0.078033	0.620058	0.0788684	0.628054	0.0797044	0.636089	0.0805411	0.644163	0.0813785	0.652277	0.0822164	0.626358	0.079615	0.628668	0.0797129	0.626358	0.0797581			0.602215	0.0795348	0.624921	0.0804716	0.600642	0.0794517	0.61078	0.0795201	0.602342	0.0798179	0.609404	0.0799123	0.612925	0.0797147	0.610277	0.0798219	0.604937	0.0799647	0.60974	0.0793491	0.608644	0.080431
		0.633005	0.0799559	0.596661	0.0763642	0.604545	0.0771983	0.612467	0.078033	0.620429	0.0788684	0.62843	0.0797044	0.63647	0.0805411	0.64455	0.0813785	0.652671	0.0822164	0.628668	0.0798565	0.630982	0.0799539	0.628668	0.08			0.599408	0.0793529	0.621041	0.0804326	0.598024	0.0791888	0.608644	0.0793425	0.599056	0.0795879	0.606487	0.0797067	0.61093	0.0795396	0.607658	0.0795773	0.602565	0.0798048	0.608581	0.0791307	0.605008	0.0802084
		0.636358	0.0799581	0.597	0.0763725	0.604889	0.0772067	0.612817	0.0780415	0.620784	0.078877	0.628791	0.0797131	0.636837	0.0805499	0.644922	0.0813874	0.653048	0.0822254	0.630982	0.0800979	0.633299	0.080195	0.630982	0.080242			0.59698	0.0791618	0.617162	0.0803803	0.595762	0.078921	0.606797	0.079159	0.596215	0.0793472	0.603965	0.0794918	0.609205	0.0793593	0.605395	0.0793268	0.600515	0.079637	0.607876	0.0789242	0.601863	0.0799738
		0.637365	0.0800366	0.597298	0.0763885	0.605192	0.0772229	0.613124	0.0780579	0.621096	0.0788935	0.629107	0.0797299	0.637158	0.0805668	0.645248	0.0814044	0.653379	0.0822427	0.633299	0.0803395	0.635619	0.0804362	0.633299	0.0804839			0.594979	0.078965	0.613315	0.0803153	0.5939	0.0786536	0.605276	0.0789732	0.593873	0.0791007	0.601887	0.0792718	0.607784	0.0791774	0.603531	0.0790752	0.598825	0.0794646	0.607645	0.0787353	0.599272	0.0797317
		0.628081	0.0801276	0.59753	0.0764108	0.605427	0.0772455	0.613363	0.0780807	0.621338	0.0789166	0.629353	0.0797532	0.637408	0.0805904	0.645502	0.0814283	0.653636	0.0822668	0.635619	0.0805811	0.637943	0.0806774	0.635619	0.080726			0.593445	0.0787665	0.609535	0.0802381	0.592472	0.0783918	0.60411	0.0787885	0.592078	0.078853	0.600294	0.079051	0.606695	0.0789975	0.602102	0.0788276	0.597529	0.079291	0.607893	0.0785691	0.597284	0.0794868
		0.626609	0.0801291	0.597677	0.0764377	0.605576	0.0772727	0.613515	0.0781082	0.621492	0.0789445	0.629509	0.0797813	0.637566	0.0806188	0.645663	0.081457	0.653799	0.0822958	0.637943	0.0808227	0.64027	0.0809186	0.637943	0.0809681			0.592406	0.0785701	0.605853	0.0801493	0.591508	0.0781406	0.603321	0.0786087	0.590863	0.0786091	0.599216	0.0788337	0.605958	0.0788229	0.601137	0.0785887	0.596652	0.0791196	0.608614	0.0784302	0.595938	0.0792439
		0.632076	0.0801368	0.597727	0.076467	0.605627	0.0773023	0.613567	0.0781382	0.621545	0.0789747	0.629563	0.0798119	0.637621	0.0806498	0.645718	0.0814883	0.653855	0.0823274	0.64027	0.0810644	0.6426	0.0811599	0.64027	0.0812102			0.591884	0.0783797	0.6023	0.0800497	0.591027	0.0779049	0.602926	0.0784373	0.590252	0.0783737	0.598674	0.0786241	0.605589	0.0786572	0.600653	0.0783632	0.596211	0.0789537	0.609789	0.0783223	0.595261	0.0790078
		0.636248	0.0801792	ConcTikEll	ConcTikEll	ConcTikEll	ConcTikEll	ConcTikEll	ConcTikEll	ConcTikEll	ConcTikEll	ConcTikEll	ConcTikEll	ConcTikEll	ConcTikEll	ConcTikEll	ConcTikEll	ConcTikEll	ConcTikEll	0.6426	0.0813062	0.644933	0.0814013	0.6426	0.0814525			0.591888	0.0781989	0.598908	0.0799402	0.591036	0.0776894	0.602931	0.0782775	0.590258	0.0781514	0.598679	0.0784264	0.605595	0.0785035	0.600662	0.0781555	0.596215	0.0787965	0.611385	0.0782484	0.595265	0.0787831
		0.635311	0.0803034																	0.644933	0.081548	0.64727	0.0816427	0.644933	0.0816947			0.592418	0.0780312	0.595705	0.0798218	0.591538	0.0774982	0.603337	0.0781324	0.590879	0.0779464	0.59923	0.0782442	0.605975	0.0783648	0.601162	0.0779696	0.596663	0.0786511	0.613358	0.0782105	0.595951	0.078574
		0.632845	0.0803553																	0.64727	0.0817899	0.64961	0.0818842	0.64727	0.081937			0.593464	0.07788	0.592718	0.0796953	0.59252	0.0773351	0.604135	0.078005	0.592105	0.0777629	0.600318	0.0780813	0.606722	0.0782439	0.602143	0.0778091	0.597547	0.0785203	0.615656	0.0782096	0.597306	0.0783847
		0.6309	0.080453																	0.64961	0.0820318	0.651954	0.0821257	0.64961	0.0821794			0.595006	0.0777482	0.589973	0.0795619	0.593965	0.0772031	0.605311	0.0778976	0.59391	0.0776042	0.601921	0.0779407	0.607821	0.078143	0.603587	0.0776771	0.598849	0.0784067	0.618215	0.0782459	0.599302	0.0782189
		0.641409	0.0804801																	0.651954	0.0822738	0.6543	0.0823673	0.651954	0.0824218			0.597013	0.0776383	0.587493	0.0794227	0.595844	0.077105	0.606841	0.0778125	0.596261	0.0774737	0.604007	0.0778252	0.609251	0.0780642	0.605465	0.0775763	0.600545	0.0783125	0.620965	0.0783181	0.601901	0.0780797
		IsoLine	IsoLine																	0.6543	0.0825158	0.656651	0.0826089	0.6543	0.0826643			0.599447	0.0775525	0.585299	0.079279	0.598122	0.0770425	0.608696	0.0777511	0.599111	0.0773737	0.606537	0.077737	0.610985	0.0780089	0.607742	0.0775085	0.602602	0.0782395	0.623832	0.0784245	0.605052	0.07797
																				0.656651	0.0827579	0.659004	0.0828506	0.656651	0.0829068			0.602259	0.0774924	0.583411	0.0791318	0.600752	0.077017	0.610839	0.0777148	0.602404	0.0773062	0.60946	0.0776779	0.612988	0.0779783	0.610372	0.0774752	0.604978	0.0781891	0.626736	0.0785621	0.608695	0.0778918
																				0.659004	0.083	0.660461	0.083	0.657554	0.083			0.605397	0.0774592	0.581843	0.0789826	0.603685	0.0770288	0.613229	0.0777042	0.606078	0.0772726	0.61272	0.077649	0.615221	0.077973	0.613304	0.0774768	0.607629	0.0781624	0.6296	0.0787272	0.612758	0.0778467
																				0.659004	0.083	ConcBand	ConcBand	ConcBand	ConcBand			0.608797	0.0774537	0.580611	0.0788326	0.606862	0.0770779	0.615819	0.0777195	0.610059	0.0772734	0.616254	0.0776509	0.617642	0.077993	0.616482	0.0775136	0.610501	0.0781598	0.632345	0.0789151	0.617162	0.0778355
																				IsoLine	IsoLine							0.612395	0.0774757	0.579723	0.078683	0.610223	0.0771631	0.618559	0.0777605	0.614271	0.0773088	0.619992	0.0776836	0.620202	0.078038	0.619843	0.0775846	0.613541	0.0781813	0.634896	0.079121	0.621821	0.0778584
																												0.61612	0.077525	0.579188	0.0785351	0.613702	0.077283	0.621395	0.0778263	0.618632	0.0773779	0.623863	0.0777463	0.622852	0.078107	0.623322	0.0776885	0.616688	0.0782267	0.637183	0.079339	0.626645	0.0779151
																												0.619899	0.0776006	0.57901	0.0783902	0.617231	0.077435	0.624273	0.0779156	0.623056	0.0774795	0.62779	0.0778379	0.625541	0.0781988	0.626852	0.0778233	0.61988	0.0782949	0.639144	0.0795632	0.631539	0.0780043
																												0.62366	0.077701	0.579191	0.0782495	0.620742	0.0776164	0.627136	0.0780268	0.627459	0.0776116	0.631697	0.0779566	0.628216	0.0783116	0.630363	0.0779864	0.623057	0.0783846	0.640726	0.0797876	0.63641	0.0781245
																												0.627328	0.0778243	0.57973	0.0781143	0.624165	0.0778235	0.629928	0.0781576	0.631753	0.0777715	0.635508	0.0781001	0.630825	0.0784431	0.633787	0.0781746	0.626156	0.0784942	0.641885	0.0800061	0.641161	0.0782731
																												0.630833	0.077968	0.580621	0.0779856	0.627436	0.0780523	0.632595	0.0783056	0.635855	0.0779563	0.639149	0.0782656	0.633318	0.0785908	0.637058	0.0783843	0.629117	0.0786215	0.64259	0.0802125	0.6457	0.0784474
																												0.634106	0.0781294	0.581856	0.0778646	0.630488	0.0782983	0.635086	0.0784678	0.639687	0.0781622	0.64255	0.0784499	0.635645	0.0787519	0.640113	0.0786113	0.631881	0.0787639	0.642821	0.0804015	0.649939	0.078644
																												0.637083	0.0783053	0.583427	0.0777523	0.633265	0.0785568	0.637352	0.078641	0.643172	0.0783853	0.645643	0.0786493	0.637761	0.0789231	0.64289	0.0788512	0.634396	0.0789188	Black	Black	0.653796	0.0788589
																												0.639707	0.0784922	0.585318	0.0776497	0.63571	0.0788228	0.639348	0.078822	0.646243	0.0786212	0.648369	0.0788601	0.639626	0.0791012	0.645337	0.0790994	0.636613	0.0790831			0.657195	0.0790881
																												0.641927	0.0786867	0.587515	0.0775576	0.637778	0.079091	0.641036	0.0790071	0.648841	0.0788654	0.650674	0.079078	0.641203	0.0792827	0.647406	0.079351	0.638488	0.0792536			0.66007	0.0793271
																												0.643699	0.0788848	0.589997	0.0774768	0.639427	0.0793563	0.642383	0.0791928	0.650914	0.0791131	0.652514	0.0792989	0.642461	0.0794641	0.649057	0.0796012	0.639984	0.079427			0.662365	0.0795712
																												0.644989	0.0790827	0.592745	0.0774081	0.640625	0.0796134	0.643363	0.0793754	0.652423	0.0793595	0.653854	0.0795185	0.643376	0.0796418	0.650257	0.079845	0.641074	0.0795999			0.664036	0.0798156
																												0.645771	0.0792766	0.595734	0.0773519	0.64135	0.0798575	0.643956	0.0795515	0.653338	0.0795997	0.654666	0.0797325	0.64393	0.0798123	0.650983	0.0800778	0.641734	0.079769			0.66505	0.0800557
																												0.646031	0.0794627	0.598939	0.0773089	0.641587	0.0800836	0.644152	0.0797176	0.653642	0.0798291	0.654935	0.0799367	0.644112	0.0799724	0.651221	0.080295	0.641953	0.079931			0.665387	0.0802867
																												Black	Black	0.602333	0.0772792	Black	Black	Black	Black	Black	Black	Black	Black	Black	Black	Black	Black	Black	Black			Black	Black
																														0.605887	0.0772633
																														0.60957	0.0772612
																														0.613351	0.077273
																														0.617198	0.0772985
																														0.621078	0.0773376
																														0.624958	0.0773899
																														0.628804	0.0774549
																														0.632585	0.0775321
																														0.636267	0.0776209
																														0.639819	0.0777204
																														0.643211	0.0778299
																														0.646415	0.0779484
																														0.649402	0.0780749
																														0.652147	0.0782083
																														0.654627	0.0783474
																														0.65682	0.0784912
																														0.658709	0.0786383
																														0.660276	0.0787875
																														0.661509	0.0789376
																														0.662396	0.0790872
																														0.662931	0.0792351
																														0.663109	0.07938
																														Black	Black
[truncated: 36 more columns]

## Sheet: PlotDat3
Source sheet	Hoja1	0.619018	0.0782477	0.597727	0.076467	0.605627	0.0773023	0.613567	0.0781382	0.621545	0.0789747	0.629563	0.0798119	0.592092	0.076	0.593376	0.076	0.590814	0.076	0.588642	0.0756324	0.644574	0.0791295	0.642337	0.0792803	0.654649	0.0791853	0.651123	0.0790805	0.640422	0.0792035	0.649218	0.0793466	0.634812	0.0788795
Plot name	Concordia5	0.623639	0.07845	0.597677	0.0764963	0.605576	0.0773318	0.613515	0.0781681	0.621492	0.079005	0.629509	0.0798425	0.592092	0.076	0.593547	0.0760182	0.592092	0.0761364	0.596484	0.076467	0.644461	0.0792582	0.642252	0.0793802	0.654505	0.0793233	0.651014	0.0791873	0.640337	0.0793	0.649125	0.0794479	0.6347	0.0789613
Plot Type	1	0.621628	0.0785194	0.59753	0.0765231	0.605427	0.077359	0.613363	0.0781956	0.621338	0.0790328	0.629353	0.0798706	0.593547	0.0761549	0.595004	0.0761728	0.593547	0.0762915	0.604365	0.0773023	0.64413	0.0793783	0.642009	0.0794721	0.654081	0.0794544	0.650694	0.0792885	0.64009	0.0793899	0.648852	0.0795429	0.634371	0.0790346
1st free col	37	0.626206	0.0785381	0.597298	0.0765455	0.605192	0.0773816	0.613124	0.0782184	0.621096	0.0790559	0.629107	0.079894	0.595004	0.0763097	0.596462	0.0763274	0.595004	0.0764467	0.612285	0.0781382	0.643585	0.0794888	0.641609	0.0795553	0.65338	0.0795775	0.650165	0.0793833	0.639683	0.0794725	0.648402	0.0796309	0.633833	0.079098
Sigma Level	2	0.621332	0.0785388	0.597	0.0765615	0.604889	0.0773978	0.612817	0.0782348	0.620784	0.0790724	0.628791	0.0799107	0.596462	0.0764646	0.597921	0.076482	0.596462	0.0766019	0.620244	0.0789747	0.642831	0.0795887	0.641056	0.0796291	0.652408	0.0796916	0.649431	0.0794709	0.639119	0.0795472	0.647778	0.0797111	0.633096	0.0791501
Absolute Errs	FALSE	0.628066	0.0787151	0.596661	0.0765698	0.604545	0.0774062	0.612467	0.0782433	0.620429	0.079081	0.62843	0.0799194	0.597921	0.0766196	0.599382	0.0766367	0.597921	0.0767571	0.628242	0.0798119	0.641873	0.0796771	0.640354	0.0796929	0.651173	0.0797956	0.648499	0.0795505	0.638404	0.0796133	0.646986	0.0797828	0.632173	0.0791899
Symbol Type	1	IsoLine	IsoLine	0.596307	0.0765698	0.604185	0.0774062	0.612102	0.0782433	0.620058	0.079081	0.628054	0.0799194	0.599382	0.0767745	0.600844	0.0767914	0.599382	0.0769124	IsoLine	IsoLine	0.64072	0.0797534	0.63951	0.079746	0.649686	0.0798888	0.647377	0.0796215	0.637543	0.0796703	0.646032	0.0798454	0.631084	0.0792168
Inverse Plot	FALSE			0.595968	0.0765615	0.603841	0.0773978	0.611752	0.0782348	0.619703	0.0790724	0.627693	0.0799107	0.600844	0.0769295	0.602307	0.0769461	0.600844	0.0770676			0.639383	0.0798168	0.63853	0.0797881	0.64796	0.0799703	0.646075	0.0796832	0.636543	0.0797175	0.644926	0.0798983	0.629848	0.0792302
Color Plot	FALSE			0.59567	0.0765455	0.603538	0.0773816	0.611445	0.0782184	0.619391	0.0790559	0.627377	0.079894	0.602307	0.0770845	0.603772	0.0771008	0.602307	0.0772229			0.637871	0.0798668	0.637423	0.0798187	0.64601	0.0800395	0.644602	0.0797352	0.635414	0.0797547	0.643675	0.0799411	0.628491	0.0792298
3D plot	FALSE			0.595438	0.0765231	0.603303	0.077359	0.611206	0.0781956	0.619149	0.0790328	0.62713	0.0798706	0.603772	0.0772395	0.605238	0.0772556	0.603772	0.0773782			0.636198	0.079903	0.636199	0.0798377	0.643851	0.0800956	0.642973	0.079777	0.634165	0.0797816	0.642291	0.0799735	0.627038	0.0792156
Linear	FALSE			0.595291	0.0764963	0.603154	0.0773318	0.611055	0.0781681	0.618995	0.079005	0.626974	0.0798425	0.605238	0.0773945	0.606705	0.0774103	0.605238	0.0775335			0.634379	0.079925	0.634867	0.0798449	0.641503	0.0801384	0.641201	0.0798082	0.632806	0.0797978	0.640786	0.0799952	0.625518	0.0791879
Data Range	H16:L21			0.595241	0.076467	0.603103	0.0773023	0.611003	0.0781382	0.618942	0.0789747	0.626921	0.0798119	0.606705	0.0775496	0.608174	0.0775651	0.606705	0.0776889			0.632429	0.0799328	0.63344	0.0798401	0.638985	0.0801673	0.639301	0.0798286	0.63135	0.0798033	0.639172	0.0800059	0.623961	0.0791472
Filled Symbols	FALSE			0.595291	0.0764377	0.603154	0.0772727	0.611055	0.0781082	0.618995	0.0789445	0.626974	0.0797813	0.608174	0.0777047	0.609644	0.0777199	0.608174	0.0778442			0.630365	0.0799262	0.631929	0.0798235	0.636319	0.0801821	0.637289	0.0798379	0.629807	0.079798	0.637464	0.0800056	0.622396	0.0790944
ConcAge	TRUE			0.595438	0.0764108	0.603303	0.0772455	0.611206	0.0780807	0.619149	0.0789166	0.62713	0.0797532	0.609644	0.0778598	0.611115	0.0778748	0.609644	0.0779996			0.628204	0.0799053	0.630347	0.0797952	0.633528	0.0801828	0.635183	0.0798362	0.628193	0.079782	0.635675	0.0799943	0.620855	0.0790305
ConcSwap	FALSE			0.59567	0.0763885	0.603538	0.0772229	0.611445	0.0780579	0.619391	0.0788935	0.627377	0.0797299	0.611115	0.0780149	0.612588	0.0780296	0.611115	0.0781551			0.625964	0.0798702	0.628708	0.0797554	0.630635	0.0801692	0.633	0.0798234	0.62652	0.0797553	0.633822	0.0799721	0.619367	0.0789566
1st Symbol-row	1			0.595968	0.0763725	0.603841	0.0772067	0.611752	0.0780415	0.619703	0.078877	0.627693	0.0797131	0.612588	0.0781701	0.614062	0.0781845	0.612588	0.0783105			0.623665	0.0798213	0.627026	0.0797044	0.627665	0.0801416	0.630759	0.0797996	0.624803	0.0797183	0.631919	0.0799391	0.61796	0.0788743
				0.596307	0.0763642	0.604185	0.0771983	0.612102	0.078033	0.620058	0.0788684	0.628054	0.0797044	0.614062	0.0783252	0.615537	0.0783394	0.614062	0.078466			0.621326	0.0797589	0.625315	0.0796428	0.624644	0.0801002	0.628479	0.0797651	0.623056	0.0796712	0.629984	0.0798957	0.616664	0.0787851
				0.596661	0.0763642	0.604545	0.0771983	0.612467	0.078033	0.620429	0.0788684	0.62843	0.0797044	0.615537	0.0784804	0.617014	0.0784944	0.615537	0.0786214			0.618968	0.0796837	0.623589	0.0795709	0.621597	0.0800452	0.62618	0.0797201	0.621294	0.0796145	0.628032	0.0798423	0.615502	0.0786908
				0.597	0.0763725	0.604889	0.0772067	0.612817	0.0780415	0.620784	0.078877	0.628791	0.0797131	0.617014	0.0786357	0.618492	0.0786493	0.617014	0.0787769			0.61661	0.0795962	0.621864	0.0794896	0.61855	0.0799773	0.623881	0.079665	0.619533	0.0795486	0.62608	0.0797792	0.614498	0.0785932
				0.597298	0.0763885	0.605192	0.0772229	0.613124	0.0780579	0.621096	0.0788935	0.629107	0.0797299	0.618492	0.0787909	0.619971	0.0788043	0.618492	0.0789325			0.614273	0.0794972	0.620154	0.0793993	0.61553	0.0798969	0.621602	0.0796003	0.617787	0.079474	0.624146	0.079707	0.61367	0.0784943
				0.59753	0.0764108	0.605427	0.0772455	0.613363	0.0780807	0.621338	0.0789166	0.629353	0.0797532	0.619971	0.0789462	0.621452	0.0789593	0.619971	0.079088			0.611976	0.0793876	0.618474	0.0793009	0.612562	0.0798047	0.619362	0.0795265	0.616071	0.0793915	0.622245	0.0796264	0.613036	0.0783959
				0.597677	0.0764377	0.605576	0.0772727	0.613515	0.0781082	0.621492	0.0789445	0.629509	0.0797813	0.621452	0.0791014	0.622934	0.0791143	0.621452	0.0792436			0.609739	0.0792682	0.616838	0.0791953	0.609671	0.0797016	0.61718	0.0794443	0.6144	0.0793017	0.620393	0.079538	0.612607	0.0782999
				0.597727	0.076467	0.605627	0.0773023	0.613567	0.0781382	0.621545	0.0789747	0.629563	0.0798119	0.622934	0.0792567	0.624418	0.0792693	0.622934	0.0793992			0.607581	0.0791401	0.61526	0.0790834	0.606882	0.0795884	0.615076	0.0793544	0.612789	0.0792054	0.618607	0.0794426	0.612392	0.0782083
				ConcTikEll	ConcTikEll	ConcTikEll	ConcTikEll	ConcTikEll	ConcTikEll	ConcTikEll	ConcTikEll	ConcTikEll	ConcTikEll	0.624418	0.0794121	0.625903	0.0794244	0.624418	0.0795548			0.605521	0.0790044	0.613754	0.078966	0.604219	0.0794661	0.613066	0.0792575	0.61125	0.0791034	0.616902	0.079341	0.612395	0.0781227
														0.625903	0.0795674	0.627389	0.0795795	0.625903	0.0797105			0.603577	0.0788623	0.612332	0.0788442	0.601704	0.0793357	0.611169	0.0791545	0.609797	0.0789966	0.615291	0.079234	0.612615	0.078045
														0.627389	0.0797228	0.628876	0.0797346	0.627389	0.0798661			0.601763	0.0787149	0.611006	0.0787191	0.599359	0.0791983	0.6094	0.0790462	0.608443	0.0788859	0.61379	0.0791227	0.613049	0.0779765
														0.628876	0.0798782	0.630365	0.0798897	0.628876	0.0800218			0.600097	0.0785635	0.609788	0.0785916	0.597205	0.0790552	0.607774	0.0789336	0.607198	0.0787723	0.612411	0.0790078	0.613689	0.0779187
														0.630365	0.0800336	0.631856	0.0800449	0.630365	0.0801775			0.598593	0.0784094	0.608688	0.078463	0.595258	0.0789074	0.606306	0.0788176	0.606075	0.0786566	0.611165	0.0788904	0.614521	0.0778725
														0.631856	0.0801891	0.633347	0.0802	0.631856	0.0803332			0.597263	0.078254	0.607716	0.0783342	0.593537	0.0787564	0.605007	0.0786992	0.605081	0.0785399	0.610064	0.0787716	0.615529	0.0778391
														0.633347	0.0803445	0.63484	0.0803552	0.633347	0.080489			0.596118	0.0780985	0.60688	0.0782065	0.592055	0.0786033	0.603889	0.0785795	0.604226	0.0784233	0.609115	0.0786522	0.616695	0.0778189
														0.63484	0.0805	0.636234	0.0805	0.633453	0.0805			0.595169	0.0779442	0.606186	0.0780808	0.590826	0.0784496	0.602962	0.0784594	0.603517	0.0783076	0.608329	0.0785334	0.617994	0.0778124
														0.63484	0.0805	ConcBand	ConcBand	ConcBand	ConcBand			0.594423	0.0777926	0.605642	0.0779582	0.589859	0.0782964	0.602232	0.0783399	0.60296	0.0781938	0.607711	0.0784162	0.619403	0.0778197
														IsoLine	IsoLine							0.593887	0.0776448	0.605251	0.0778399	0.589164	0.0781451	0.601708	0.0782222	0.602559	0.0780831	0.607267	0.0783015	0.620893	0.0778407
																						0.593565	0.0775022	0.605017	0.0777267	0.588745	0.077997	0.601392	0.0781071	0.602319	0.0779762	0.607	0.0781903	0.622435	0.077875
																						0.593461	0.077366	0.604941	0.0776198	0.588607	0.0778534	0.601288	0.0779958	0.602241	0.0778741	0.606913	0.0780836	0.624	0.0779219
																						0.593574	0.0772372	0.605026	0.0775199	0.588751	0.0777154	0.601397	0.077889	0.602326	0.0777777	0.607006	0.0779823	0.625557	0.0779804
																						0.593905	0.0771171	0.605269	0.077428	0.589175	0.0775843	0.601717	0.0777878	0.602573	0.0776878	0.607279	0.0778872	0.627075	0.0780495
																						0.59445	0.0770066	0.605669	0.0773447	0.589876	0.0774612	0.602247	0.077693	0.60298	0.0776051	0.60773	0.0777992	0.628526	0.0781277
																						0.595204	0.0769068	0.606222	0.0772709	0.590848	0.0773471	0.60298	0.0776054	0.603544	0.0775304	0.608353	0.0777191	0.629881	0.0782137
																						0.596162	0.0768183	0.606924	0.0772072	0.592083	0.0772431	0.603912	0.0775258	0.604259	0.0774643	0.609145	0.0776474	0.631113	0.0783056
																						0.597315	0.0767421	0.607768	0.0771541	0.593569	0.0771499	0.605034	0.0774548	0.60512	0.0774074	0.610099	0.0775848	0.632199	0.0784018
																						0.598653	0.0766787	0.608748	0.077112	0.595295	0.0770684	0.606337	0.077393	0.60612	0.0773601	0.611206	0.0775319	0.633117	0.0785003
																						0.600164	0.0766287	0.609855	0.0770813	0.597246	0.0769992	0.607809	0.077341	0.607249	0.0773229	0.612456	0.077489	0.633849	0.0785992
																						0.601837	0.0765925	0.611079	0.0770623	0.599405	0.0769431	0.609438	0.0772993	0.608498	0.0772961	0.61384	0.0774566	0.634382	0.0786967
																						0.603656	0.0765704	0.612411	0.0770552	0.601753	0.0769004	0.61121	0.0772681	0.609857	0.0772798	0.615345	0.077435	0.634705	0.0787907
																						0.605606	0.0765626	0.613838	0.0770599	0.604271	0.0768715	0.61311	0.0772477	0.611314	0.0772743	0.616959	0.0774243	0.634812	0.0788795
																						0.60767	0.0765692	0.615349	0.0770766	0.606937	0.0768566	0.615122	0.0772383	0.612856	0.0772796	0.618667	0.0774246
																						0.609832	0.0765902	0.616931	0.0771049	0.609728	0.076856	0.617228	0.0772401	0.61447	0.0772956	0.620456	0.0774359
																						0.612071	0.0766252	0.61857	0.0771447	0.612621	0.0768695	0.619411	0.0772529	0.616143	0.0773223	0.622309	0.0774581
																						0.61437	0.0766741	0.620252	0.0771956	0.615591	0.0768971	0.621652	0.0772767	0.617861	0.0773593	0.624212	0.077491
																						0.616709	0.0767365	0.621963	0.0772573	0.618612	0.0769386	0.623932	0.0773112	0.619607	0.0774064	0.626147	0.0775344
																						0.619067	0.0768117	0.623689	0.0773291	0.621659	0.0769935	0.626231	0.0773562	0.621369	0.0774631	0.628099	0.0775879
																						0.621425	0.0768992	0.625414	0.0774105	0.624705	0.0770614	0.62853	0.0774113	0.62313	0.0775291	0.630051	0.077651
																						0.623762	0.0769982	0.627124	0.0775008	0.627726	0.0771418	0.630809	0.077476	0.624876	0.0776036	0.631985	0.0777231
																						0.626059	0.0771078	0.628804	0.0775991	0.630694	0.077234	0.633049	0.0775497	0.626592	0.0776861	0.633887	0.0778037
																						0.628296	0.0772272	0.63044	0.0777047	0.633585	0.0773371	0.635231	0.0776319	0.628263	0.0777759	0.635738	0.0778921
																						0.630454	0.0773553	0.632018	0.0778167	0.636374	0.0774503	0.637335	0.0777219	0.629874	0.0778722	0.637524	0.0779875
																						0.632514	0.077491	0.633524	0.0779341	0.639037	0.0775726	0.639345	0.0778188	0.631413	0.0779742	0.63923	0.0780892
																						0.634459	0.0776331	0.634947	0.0780559	0.641552	0.077703	0.641242	0.0779218	0.632866	0.078081	0.64084	0.0781961
																						0.636272	0.0777805	0.636272	0.078181	0.643896	0.0778404	0.643011	0.0780301	0.63422	0.0781917	0.642341	0.0783075
																						0.637938	0.0779319	0.63749	0.0783084	0.646051	0.0779835	0.644637	0.0781427	0.635465	0.0783054	0.64372	0.0784224
																						0.639442	0.078086	0.63859	0.0784371	0.647997	0.0781313	0.646106	0.0782587	0.636589	0.078421	0.644966	0.0785397
																						0.640773	0.0782415	0.639562	0.0785658	0.649719	0.0782823	0.647404	0.0783771	0.637582	0.0785377	0.646068	0.0786586
																						0.641917	0.078397	0.640399	0.0786936	0.6512	0.0784354	0.648522	0.0784968	0.638437	0.0786544	0.647016	0.0787779
																						0.642867	0.0785512	0.641092	0.0788193	0.65243	0.0785891	0.64945	0.0786169	0.639146	0.0787701	0.647802	0.0788967
																						0.643612	0.0787028	0.641637	0.0789418	0.653396	0.0787423	0.650179	0.0787364	0.639703	0.0788838	0.64842	0.079014
																						0.644148	0.0788506	0.642027	0.0790602	0.654092	0.0788936	0.650703	0.0788541	0.640104	0.0789946	0.648864	0.0791287
																						0.64447	0.0789932	0.642262	0.0791733	0.65451	0.0790417	0.651019	0.0789691	0.640344	0.0791015	0.649131	0.0792399
																						0.644574	0.0791295	0.642337	0.0792803	0.654649	0.0791853	0.651123	0.0790805	0.640422	0.0792035	0.649218	0.0793466
																						Black	Black	Black	Black	Black	Black	Black	Black	Black	Black	Black	Black

## Sheet: PlotDat8
Source sheet	Hoja1	0.618925	0.0788753	0.597727	0.076467	0.605627	0.0773023	0.613567	0.0781382	0.621545	0.0789747	0.629563	0.0798119	0.637621	0.0806498	0.645718	0.0814883	0.653855	0.0823274	0.592092	0.076	0.593376	0.076	0.590814	0.076	0.588642	0.0756324	0.646031	0.0794627	0.663109	0.07938	0.641587	0.0800836	0.644152	0.0797176	0.653642	0.0798291	0.654935	0.0799367	0.644112	0.0799724	0.651221	0.080295	0.641953	0.079931	0.642821	0.0804015	0.665387	0.0802867
Plot name	Concordia8	0.62106	0.0788851	0.597677	0.0764963	0.605576	0.0773318	0.613515	0.0781681	0.621492	0.079005	0.629509	0.0798425	0.637566	0.0806807	0.645663	0.0815195	0.653799	0.082359	0.592092	0.076	0.594354	0.0761038	0.592092	0.0761364	0.596484	0.076467	0.645763	0.0796373	0.662928	0.0795206	0.641331	0.0802875	0.643946	0.0798703	0.653327	0.0800433	0.654656	0.0801271	0.643919	0.080119	0.650966	0.0804923	0.641727	0.0800826	0.642573	0.0805677	0.665041	0.0805042
Plot Type	1	0.616278	0.078939	0.59753	0.0765231	0.605427	0.077359	0.613363	0.0781956	0.621338	0.0790328	0.629353	0.0798706	0.637408	0.0807091	0.645502	0.0815483	0.653636	0.0823881	0.594354	0.0762406	0.596619	0.076344	0.594354	0.0763775	0.604365	0.0773023	0.644973	0.0797971	0.66239	0.0796559	0.640587	0.0804651	0.643342	0.0800069	0.652401	0.0802381	0.653834	0.0803001	0.643354	0.0802491	0.650224	0.0806659	0.641059	0.080221	0.641852	0.0807066	0.664018	0.0807038
1st free col	87	0.623515	0.0790366	0.597298	0.0765455	0.605192	0.0773816	0.613124	0.0782184	0.621096	0.0790559	0.629107	0.079894	0.637158	0.0807327	0.645248	0.0815721	0.653379	0.0824122	0.596619	0.0764813	0.598887	0.0765843	0.596619	0.0766186	0.612285	0.0781382	0.643676	0.079939	0.661499	0.0797846	0.63937	0.080613	0.642352	0.0801246	0.650882	0.0804096	0.652486	0.0804522	0.642429	0.0803603	0.649008	0.0808125	0.639963	0.0803435	0.640677	0.0808145	0.662339	0.0808818
Sigma Level	2	0.62191	0.0790449	0.597	0.0765615	0.604889	0.0773978	0.612817	0.0782348	0.620784	0.0790724	0.628791	0.0799107	0.636837	0.0807496	0.644922	0.0815892	0.653048	0.0824294	0.598887	0.076722	0.601158	0.0768246	0.598887	0.0768598	0.620244	0.0789747	0.641897	0.0800602	0.660263	0.0799056	0.637704	0.0807283	0.640996	0.0802211	0.648799	0.0805545	0.650636	0.0805806	0.641161	0.0804504	0.647343	0.0809292	0.63846	0.0804477	0.639081	0.0808884	0.660036	0.0810347
Absolute Errs	FALSE	0.626771	0.0792301	0.596661	0.0765698	0.604545	0.0774062	0.612467	0.0782433	0.620429	0.079081	0.62843	0.0799194	0.63647	0.0807584	0.64455	0.0815981	0.652671	0.0824384	0.601158	0.0769628	0.603433	0.077065	0.601158	0.077101	0.628242	0.0798119	0.639671	0.0801583	0.658693	0.0800179	0.635621	0.0808088	0.639299	0.0802945	0.646192	0.0806701	0.648323	0.0806826	0.639575	0.0805176	0.64526	0.0810137	0.63658	0.0805315	0.637108	0.0809263	0.657154	0.0811594
Symbol Type	1	0.624829	0.0792755	0.596307	0.0765698	0.604185	0.0774062	0.612102	0.0782433	0.620058	0.079081	0.628054	0.0799194	0.636089	0.0807584	0.644163	0.0815981	0.652277	0.0824384	0.603433	0.0772037	0.605711	0.0773055	0.603433	0.0773423	0.636279	0.0806498	0.637042	0.0802314	0.656801	0.0801205	0.633161	0.0808529	0.637296	0.0803435	0.643113	0.080754	0.64559	0.0807564	0.637702	0.0805606	0.642801	0.0810644	0.634358	0.0805933	0.63481	0.0809271	0.653748	0.0812536
Inverse Plot	FALSE	0.625908	0.0792759	0.595968	0.0765615	0.603841	0.0773978	0.611752	0.0782348	0.619703	0.0790724	0.627693	0.0799107	0.635722	0.0807496	0.643791	0.0815892	0.6519	0.0824294	0.605711	0.0774446	0.607992	0.077546	0.605711	0.0775836	0.644357	0.0814883	0.634059	0.0802781	0.654605	0.0802126	0.630373	0.0808598	0.635024	0.080367	0.639621	0.0808047	0.642491	0.0808005	0.635579	0.0805786	0.640013	0.0810803	0.631838	0.080632	0.632251	0.0808909	0.649886	0.0813154
Color Plot	FALSE	0.619055	0.0794024	0.59567	0.0765455	0.603538	0.0773816	0.611445	0.0782184	0.619391	0.0790559	0.627377	0.079894	0.635401	0.0807327	0.643465	0.0815721	0.651569	0.0824122	0.607992	0.0776855	0.610276	0.0777865	0.607992	0.077825	0.652474	0.0823274	0.630782	0.0802975	0.652122	0.0802933	0.62731	0.0808293	0.632527	0.0803647	0.635785	0.0808211	0.639085	0.0808141	0.633246	0.0805713	0.636951	0.081061	0.62907	0.0806467	0.629501	0.0808186	0.645643	0.0813436
3D plot	FALSE	0.625233	0.0795684	0.595438	0.0765231	0.603303	0.077359	0.611206	0.0781956	0.619149	0.0790328	0.62713	0.0798706	0.635151	0.0807091	0.643212	0.0815483	0.651312	0.0823881	0.610276	0.0779265	0.612564	0.0780271	0.610276	0.0780665	IsoLine	IsoLine	0.627275	0.0802893	0.649375	0.0803621	0.624033	0.0807619	0.629856	0.0803365	0.631678	0.080803	0.63544	0.0807967	0.63075	0.0805387	0.633673	0.081007	0.626106	0.0806372	0.626635	0.0807122	0.6411	0.0813378
Linear	FALSE	0.630282	0.0795902	0.595291	0.0764963	0.603154	0.0773318	0.611055	0.0781681	0.618995	0.079005	0.626974	0.0798425	0.634993	0.0806807	0.643051	0.0815195	0.651148	0.082359	0.612564	0.0781676	0.614855	0.0782678	0.612564	0.078308			0.623604	0.0802535	0.646386	0.0804182	0.620604	0.0806591	0.627061	0.0802829	0.627381	0.0807506	0.631627	0.080749	0.628138	0.0804815	0.630245	0.0809193	0.623006	0.0806037	0.62373	0.0805746	0.636347	0.0812979
Data Range	H22:L54	0.632145	0.0796386	0.595241	0.076467	0.603103	0.0773023	0.611003	0.0781382	0.618942	0.0789747	0.626921	0.0798119	0.634938	0.0806498	0.642995	0.0814883	0.651092	0.0823274	0.614855	0.0784087	0.617149	0.0785085	0.614855	0.0785495			0.619843	0.0801909	0.64318	0.0804613	0.617092	0.0805228	0.624197	0.0802052	0.622978	0.080665	0.627719	0.0806716	0.625462	0.0804009	0.626732	0.0807996	0.619828	0.0805468	0.620866	0.0804096	0.631476	0.0812247
Filled Symbols	FALSE	0.624767	0.0796921	0.595291	0.0764377	0.603154	0.0772727	0.611055	0.0781082	0.618995	0.0789445	0.626974	0.0797813	0.634993	0.0806188	0.643051	0.081457	0.651148	0.0822958	0.617149	0.0786498	0.619446	0.0787493	0.617149	0.0787911			0.616064	0.0801027	0.639786	0.0804909	0.613563	0.0803557	0.62132	0.0801047	0.618553	0.0805479	0.623792	0.0805662	0.622773	0.0802984	0.623203	0.0806503	0.616636	0.0804676	0.618121	0.0802216	0.626581	0.0811198
ConcAge	TRUE	0.623625	0.079765	0.595438	0.0764108	0.603303	0.0772455	0.611206	0.0780807	0.619149	0.0789166	0.62713	0.0797532	0.635151	0.0805904	0.643212	0.0814283	0.651312	0.0822668	0.619446	0.078891	0.621747	0.0789901	0.619446	0.0790328			0.612341	0.0799906	0.636233	0.0805068	0.610088	0.0801611	0.618486	0.0799833	0.614195	0.0804016	0.619923	0.0804347	0.620125	0.0801759	0.619727	0.0804742	0.61349	0.0803677	0.61557	0.0800158	0.621759	0.080985
ConcSwap	FALSE	0.628156	0.0797889	0.59567	0.0763885	0.603538	0.0772229	0.611445	0.0780579	0.619391	0.0788935	0.627377	0.0797299	0.635401	0.0805668	0.643465	0.0814044	0.651569	0.0822427	0.621747	0.0791323	0.624051	0.079231	0.621747	0.0792745			0.608745	0.0798568	0.63255	0.0805089	0.606733	0.0799426	0.615749	0.0798436	0.609986	0.0802288	0.616188	0.0802799	0.617568	0.080036	0.616371	0.0802748	0.610453	0.080249	0.613283	0.0797978	0.617102	0.0808232
1st Symbol-row	1	0.628248	0.0797936	0.595968	0.0763725	0.603841	0.0772067	0.611752	0.0780415	0.619703	0.078877	0.627693	0.0797131	0.635722	0.0805499	0.643791	0.0813874	0.6519	0.0822254	0.624051	0.0793736	0.626358	0.0794719	0.624051	0.0795163			0.605348	0.0797039	0.628768	0.0804971	0.603564	0.0797046	0.613164	0.0796882	0.606009	0.080033	0.612659	0.0801046	0.615152	0.0798812	0.6132	0.080056	0.607584	0.0801138	0.611322	0.0795735	0.612702	0.0806373
		0.627327	0.0798306	0.596307	0.0763642	0.604185	0.0771983	0.612102	0.078033	0.620058	0.0788684	0.628054	0.0797044	0.636089	0.0805411	0.644163	0.0813785	0.652277	0.0822164	0.626358	0.079615	0.628668	0.0797129	0.626358	0.0797581			0.602215	0.0795348	0.624921	0.0804716	0.600642	0.0794517	0.61078	0.0795201	0.602342	0.0798179	0.609404	0.0799123	0.612925	0.0797147	0.610277	0.0798219	0.604937	0.0799647	0.60974	0.0793491	0.608644	0.080431
		0.633005	0.0799559	0.596661	0.0763642	0.604545	0.0771983	0.612467	0.078033	0.620429	0.0788684	0.62843	0.0797044	0.63647	0.0805411	0.64455	0.0813785	0.652671	0.0822164	0.628668	0.0798565	0.630982	0.0799539	0.628668	0.08			0.599408	0.0793529	0.621041	0.0804326	0.598024	0.0791888	0.608644	0.0793425	0.599056	0.0795879	0.606487	0.0797067	0.61093	0.0795396	0.607658	0.0795773	0.602565	0.0798048	0.608581	0.0791307	0.605008	0.0802084
		0.636358	0.0799581	0.597	0.0763725	0.604889	0.0772067	0.612817	0.0780415	0.620784	0.078877	0.628791	0.0797131	0.636837	0.0805499	0.644922	0.0813874	0.653048	0.0822254	0.630982	0.0800979	0.633299	0.080195	0.630982	0.080242			0.59698	0.0791618	0.617162	0.0803803	0.595762	0.078921	0.606797	0.079159	0.596215	0.0793472	0.603965	0.0794918	0.609205	0.0793593	0.605395	0.0793268	0.600515	0.079637	0.607876	0.0789242	0.601863	0.0799738
		0.637365	0.0800366	0.597298	0.0763885	0.605192	0.0772229	0.613124	0.0780579	0.621096	0.0788935	0.629107	0.0797299	0.637158	0.0805668	0.645248	0.0814044	0.653379	0.0822427	0.633299	0.0803395	0.635619	0.0804362	0.633299	0.0804839			0.594979	0.078965	0.613315	0.0803153	0.5939	0.0786536	0.605276	0.0789732	0.593873	0.0791007	0.601887	0.0792718	0.607784	0.0791774	0.603531	0.0790752	0.598825	0.0794646	0.607645	0.0787353	0.599272	0.0797317
		0.628081	0.0801276	0.59753	0.0764108	0.605427	0.0772455	0.613363	0.0780807	0.621338	0.0789166	0.629353	0.0797532	0.637408	0.0805904	0.645502	0.0814283	0.653636	0.0822668	0.635619	0.0805811	0.637943	0.0806774	0.635619	0.080726			0.593445	0.0787665	0.609535	0.0802381	0.592472	0.0783918	0.60411	0.0787885	0.592078	0.078853	0.600294	0.079051	0.606695	0.0789975	0.602102	0.0788276	0.597529	0.079291	0.607893	0.0785691	0.597284	0.0794868
		0.626609	0.0801291	0.597677	0.0764377	0.605576	0.0772727	0.613515	0.0781082	0.621492	0.0789445	0.629509	0.0797813	0.637566	0.0806188	0.645663	0.081457	0.653799	0.0822958	0.637943	0.0808227	0.64027	0.0809186	0.637943	0.0809681			0.592406	0.0785701	0.605853	0.0801493	0.591508	0.0781406	0.603321	0.0786087	0.590863	0.0786091	0.599216	0.0788337	0.605958	0.0788229	0.601137	0.0785887	0.596652	0.0791196	0.608614	0.0784302	0.595938	0.0792439
		0.632076	0.0801368	0.597727	0.076467	0.605627	0.0773023	0.613567	0.0781382	0.621545	0.0789747	0.629563	0.0798119	0.637621	0.0806498	0.645718	0.0814883	0.653855	0.0823274	0.64027	0.0810644	0.6426	0.0811599	0.64027	0.0812102			0.591884	0.0783797	0.6023	0.0800497	0.591027	0.0779049	0.602926	0.0784373	0.590252	0.0783737	0.598674	0.0786241	0.605589	0.0786572	0.600653	0.0783632	0.596211	0.0789537	0.609789	0.0783223	0.595261	0.0790078
		0.636248	0.0801792	ConcTikEll	ConcTikEll	ConcTikEll	ConcTikEll	ConcTikEll	ConcTikEll	ConcTikEll	ConcTikEll	ConcTikEll	ConcTikEll	ConcTikEll	ConcTikEll	ConcTikEll	ConcTikEll	ConcTikEll	ConcTikEll	0.6426	0.0813062	0.644933	0.0814013	0.6426	0.0814525			0.591888	0.0781989	0.598908	0.0799402	0.591036	0.0776894	0.602931	0.0782775	0.590258	0.0781514	0.598679	0.0784264	0.605595	0.0785035	0.600662	0.0781555	0.596215	0.0787965	0.611385	0.0782484	0.595265	0.0787831
		0.635311	0.0803034																	0.644933	0.081548	0.64727	0.0816427	0.644933	0.0816947			0.592418	0.0780312	0.595705	0.0798218	0.591538	0.0774982	0.603337	0.0781324	0.590879	0.0779464	0.59923	0.0782442	0.605975	0.0783648	0.601162	0.0779696	0.596663	0.0786511	0.613358	0.0782105	0.595951	0.078574
		0.632845	0.0803553																	0.64727	0.0817899	0.64961	0.0818842	0.64727	0.081937			0.593464	0.07788	0.592718	0.0796953	0.59252	0.0773351	0.604135	0.078005	0.592105	0.0777629	0.600318	0.0780813	0.606722	0.0782439	0.602143	0.0778091	0.597547	0.0785203	0.615656	0.0782096	0.597306	0.0783847
		0.6309	0.080453																	0.64961	0.0820318	0.651954	0.0821257	0.64961	0.0821794			0.595006	0.0777482	0.589973	0.0795619	0.593965	0.0772031	0.605311	0.0778976	0.59391	0.0776042	0.601921	0.0779407	0.607821	0.078143	0.603587	0.0776771	0.598849	0.0784067	0.618215	0.0782459	0.599302	0.0782189
		0.641409	0.0804801																	0.651954	0.0822738	0.6543	0.0823673	0.651954	0.0824218			0.597013	0.0776383	0.587493	0.0794227	0.595844	0.077105	0.606841	0.0778125	0.596261	0.0774737	0.604007	0.0778252	0.609251	0.0780642	0.605465	0.0775763	0.600545	0.0783125	0.620965	0.0783181	0.601901	0.0780797
		IsoLine	IsoLine																	0.6543	0.0825158	0.656651	0.0826089	0.6543	0.0826643			0.599447	0.0775525	0.585299	0.079279	0.598122	0.0770425	0.608696	0.0777511	0.599111	0.0773737	0.606537	0.077737	0.610985	0.0780089	0.607742	0.0775085	0.602602	0.0782395	0.623832	0.0784245	0.605052	0.07797
																				0.656651	0.0827579	0.659004	0.0828506	0.656651	0.0829068			0.602259	0.0774924	0.583411	0.0791318	0.600752	0.077017	0.610839	0.0777148	0.602404	0.0773062	0.60946	0.0776779	0.612988	0.0779783	0.610372	0.0774752	0.604978	0.0781891	0.626736	0.0785621	0.608695	0.0778918
																				0.659004	0.083	0.660461	0.083	0.657554	0.083			0.605397	0.0774592	0.581843	0.0789826	0.603685	0.0770288	0.613229	0.0777042	0.606078	0.0772726	0.61272	0.077649	0.615221	0.077973	0.613304	0.0774768	0.607629	0.0781624	0.6296	0.0787272	0.612758	0.0778467
																				0.659004	0.083	ConcBand	ConcBand	ConcBand	ConcBand			0.608797	0.0774537	0.580611	0.0788326	0.606862	0.0770779	0.615819	0.0777195	0.610059	0.0772734	0.616254	0.0776509	0.617642	0.077993	0.616482	0.0775136	0.610501	0.0781598	0.632345	0.0789151	0.617162	0.0778355
																				IsoLine	IsoLine							0.612395	0.0774757	0.579723	0.078683	0.610223	0.0771631	0.618559	0.0777605	0.614271	0.0773088	0.619992	0.0776836	0.620202	0.078038	0.619843	0.0775846	0.613541	0.0781813	0.634896	0.079121	0.621821	0.0778584
																												0.61612	0.077525	0.579188	0.0785351	0.613702	0.077283	0.621395	0.0778263	0.618632	0.0773779	0.623863	0.0777463	0.622852	0.078107	0.623322	0.0776885	0.616688	0.0782267	0.637183	0.079339	0.626645	0.0779151
																												0.619899	0.0776006	0.57901	0.0783902	0.617231	0.077435	0.624273	0.0779156	0.623056	0.0774795	0.62779	0.0778379	0.625541	0.0781988	0.626852	0.0778233	0.61988	0.0782949	0.639144	0.0795632	0.631539	0.0780043
																												0.62366	0.077701	0.579191	0.0782495	0.620742	0.0776164	0.627136	0.0780268	0.627459	0.0776116	0.631697	0.0779566	0.628216	0.0783116	0.630363	0.0779864	0.623057	0.0783846	0.640726	0.0797876	0.63641	0.0781245
																												0.627328	0.0778243	0.57973	0.0781143	0.624165	0.0778235	0.629928	0.0781576	0.631753	0.0777715	0.635508	0.0781001	0.630825	0.0784431	0.633787	0.0781746	0.626156	0.0784942	0.641885	0.0800061	0.641161	0.0782731
																												0.630833	0.077968	0.580621	0.0779856	0.627436	0.0780523	0.632595	0.0783056	0.635855	0.0779563	0.639149	0.0782656	0.633318	0.0785908	0.637058	0.0783843	0.629117	0.0786215	0.64259	0.0802125	0.6457	0.0784474
																												0.634106	0.0781294	0.581856	0.0778646	0.630488	0.0782983	0.635086	0.0784678	0.639687	0.0781622	0.64255	0.0784499	0.635645	0.0787519	0.640113	0.0786113	0.631881	0.0787639	0.642821	0.0804015	0.649939	0.078644
																												0.637083	0.0783053	0.583427	0.0777523	0.633265	0.0785568	0.637352	0.078641	0.643172	0.0783853	0.645643	0.0786493	0.637761	0.0789231	0.64289	0.0788512	0.634396	0.0789188	Black	Black	0.653796	0.0788589
																												0.639707	0.0784922	0.585318	0.0776497	0.63571	0.0788228	0.639348	0.078822	0.646243	0.0786212	0.648369	0.0788601	0.639626	0.0791012	0.645337	0.0790994	0.636613	0.0790831			0.657195	0.0790881
																												0.641927	0.0786867	0.587515	0.0775576	0.637778	0.079091	0.641036	0.0790071	0.648841	0.0788654	0.650674	0.079078	0.641203	0.0792827	0.647406	0.079351	0.638488	0.0792536			0.66007	0.0793271
																												0.643699	0.0788848	0.589997	0.0774768	0.639427	0.0793563	0.642383	0.0791928	0.650914	0.0791131	0.652514	0.0792989	0.642461	0.0794641	0.649057	0.0796012	0.639984	0.079427			0.662365	0.0795712
																												0.644989	0.0790827	0.592745	0.0774081	0.640625	0.0796134	0.643363	0.0793754	0.652423	0.0793595	0.653854	0.0795185	0.643376	0.0796418	0.650257	0.079845	0.641074	0.0795999			0.664036	0.0798156
																												0.645771	0.0792766	0.595734	0.0773519	0.64135	0.0798575	0.643956	0.0795515	0.653338	0.0795997	0.654666	0.0797325	0.64393	0.0798123	0.650983	0.0800778	0.641734	0.079769			0.66505	0.0800557
																												0.646031	0.0794627	0.598939	0.0773089	0.641587	0.0800836	0.644152	0.0797176	0.653642	0.0798291	0.654935	0.0799367	0.644112	0.0799724	0.651221	0.080295	0.641953	0.079931			0.665387	0.0802867
																												Black	Black	0.602333	0.0772792	Black	Black	Black	Black	Black	Black	Black	Black	Black	Black	Black	Black	Black	Black			Black	Black
																														0.605887	0.0772633
																														0.60957	0.0772612
																														0.613351	0.077273
																														0.617198	0.0772985
																														0.621078	0.0773376
																														0.624958	0.0773899
																														0.628804	0.0774549
																														0.632585	0.0775321
																														0.636267	0.0776209
																														0.639819	0.0777204
																														0.643211	0.0778299
																														0.646415	0.0779484
																														0.649402	0.0780749
																														0.652147	0.0782083
																														0.654627	0.0783474
																														0.65682	0.0784912
																														0.658709	0.0786383
																														0.660276	0.0787875
																														0.661509	0.0789376
																														0.662396	0.0790872
																														0.662931	0.0792351
																														0.663109	0.07938
																														Black	Black
[truncated: 36 more columns]

## Sheet: PlotDat10
Source sheet	Hoja1	0.722244	0.0885463	0.69515	0.086533	0.703532	0.087376	0.711955	0.0882198	0.72042	0.0890642	0.728927	0.0899092	0.737476	0.0907549	0.746067	0.0916012	0.754701	0.0924482	0.688397	0.086	0.689931	0.086	0.686871	0.086	0.685345	0.0856906	0.741672	0.0892578	0.747061	0.0896027	0.760334	0.0904972	0.762476	0.0903365	0.755829	0.0916291	0.7372	0.0895484
Plot name	Concordia9	0.717581	0.0891846	0.69509	0.0865662	0.703471	0.0874097	0.711894	0.0882537	0.720358	0.0890984	0.728864	0.0899438	0.737412	0.0907898	0.746002	0.0916365	0.754635	0.0924839	0.688397	0.086	0.690774	0.0860851	0.688397	0.086155	0.693665	0.086533	0.741477	0.0894023	0.746772	0.0897606	0.760151	0.0906868	0.762302	0.0904993	0.755684	0.0918004	0.737046	0.0896557
Plot Type	1	0.718621	0.0894146	0.694914	0.0865968	0.703293	0.0874405	0.711713	0.0882849	0.720174	0.0891299	0.728678	0.0899756	0.737223	0.090822	0.745811	0.091669	0.754441	0.0925166	0.690774	0.0862406	0.693154	0.0863254	0.690774	0.0863961	0.702025	0.087376	0.740908	0.0895301	0.745915	0.0899073	0.759613	0.0908656	0.761788	0.0906541	0.755272	0.0919553	0.736596	0.0897524
1st free col	41	0.722412	0.0895621	0.694638	0.0866222	0.703012	0.0874662	0.711428	0.0883108	0.719886	0.0891561	0.728385	0.0900021	0.736926	0.0908486	0.74551	0.0916959	0.754136	0.0925438	0.693154	0.0864813	0.695537	0.0865657	0.693154	0.0866373	0.710427	0.0882198	0.739976	0.0896387	0.744506	0.0900399	0.758726	0.091032	0.760937	0.0907995	0.754596	0.0920924	0.735856	0.0898365
Sigma Level	2	0.724318	0.0898706	0.694282	0.0866404	0.702651	0.0874846	0.711062	0.0883294	0.719514	0.0891748	0.728009	0.090021	0.736545	0.0908677	0.745123	0.0917152	0.753743	0.0925633	0.695537	0.0867221	0.697923	0.086806	0.695537	0.0868785	0.718871	0.0890642	0.738699	0.0897261	0.742573	0.0901559	0.757497	0.0911846	0.759758	0.0909344	0.753662	0.0922105	0.734842	0.0899064
Absolute Errs	FALSE	IsoLine	IsoLine	0.693876	0.0866499	0.70224	0.0874941	0.710645	0.088339	0.719091	0.0891846	0.727579	0.0900308	0.736109	0.0908777	0.744682	0.0917252	0.753296	0.0925734	0.697923	0.0869628	0.700313	0.0870464	0.697923	0.0871197	0.727356	0.0899092	0.737101	0.0897905	0.740153	0.090253	0.755936	0.0913221	0.75826	0.0910576	0.752477	0.0923087	0.733574	0.0899608
Symbol Type	1			0.693453	0.0866499	0.701811	0.0874941	0.71021	0.088339	0.71865	0.0891846	0.727132	0.0900308	0.735656	0.0908777	0.744222	0.0917252	0.75283	0.0925734	0.700313	0.0872037	0.702707	0.0872868	0.700313	0.087361	0.735883	0.0907549	0.735214	0.0898307	0.737295	0.0903293	0.754057	0.0914434	0.756457	0.091168	0.751052	0.0923861	0.732076	0.0899986
Inverse Plot	FALSE			0.693048	0.0866404	0.7014	0.0874846	0.709793	0.0883294	0.718227	0.0891748	0.726703	0.090021	0.735221	0.0908677	0.74378	0.0917152	0.752382	0.0925633	0.702707	0.0874446	0.705103	0.0875273	0.702707	0.0876023	0.744452	0.0916012	0.733075	0.0898459	0.734052	0.0903833	0.751875	0.0915473	0.754363	0.0912647	0.749399	0.092442	0.730377	0.090019
Color Plot	FALSE			0.692692	0.0866222	0.701039	0.0874662	0.709427	0.0883108	0.717856	0.0891561	0.726327	0.0900021	0.734839	0.0908486	0.743394	0.0916959	0.75199	0.0925438	0.705103	0.0876855	0.707503	0.0877679	0.705103	0.0878437	0.753063	0.0924482	0.730725	0.0898358	0.730489	0.090414	0.74941	0.091633	0.751996	0.0913469	0.747532	0.092476	0.728511	0.0900218
3D plot	FALSE			0.692415	0.0865968	0.700758	0.0874405	0.709142	0.0882849	0.717567	0.0891299	0.726034	0.0899756	0.734542	0.090822	0.743092	0.091669	0.751685	0.0925166	0.707503	0.0879265	0.709907	0.0880085	0.707503	0.0880852	IsoLine	IsoLine	0.72821	0.0898007	0.726675	0.0904207	0.746682	0.0916998	0.749377	0.0914139	0.745467	0.0924877	0.726513	0.0900067
Linear	FALSE			0.69224	0.0865662	0.70058	0.0874097	0.708961	0.0882537	0.717384	0.0890984	0.725848	0.0899438	0.734354	0.0907898	0.742901	0.0916365	0.751491	0.0924839	0.709907	0.0881676	0.712314	0.0882492	0.709907	0.0883267			0.725578	0.089741	0.722684	0.0904034	0.743715	0.0917471	0.746528	0.0914651	0.743221	0.0924771	0.724423	0.0899741
Data Range	H59:L63			0.69218	0.086533	0.700519	0.087376	0.708899	0.0882198	0.717321	0.0890642	0.725784	0.0899092	0.734289	0.0907549	0.742836	0.0916012	0.751425	0.0924482	0.712314	0.0884087	0.714724	0.0884899	0.712314	0.0885683			0.722882	0.0896582	0.718593	0.0903624	0.740533	0.0917745	0.743473	0.0915	0.740814	0.0924443	0.722282	0.0899247
Filled Symbols	FALSE			0.69224	0.0864997	0.70058	0.0873424	0.708961	0.0881858	0.717384	0.0890299	0.725848	0.0898746	0.734354	0.0907199	0.742901	0.0915659	0.751491	0.0924126	0.714724	0.0886499	0.717137	0.0887306	0.714724	0.0888099			0.720174	0.0895537	0.714483	0.0902984	0.737165	0.0917818	0.740239	0.0915184	0.738267	0.0923895	0.72013	0.0898594
ConcAge	TRUE			0.692415	0.0864691	0.700758	0.0873116	0.709142	0.0881546	0.717567	0.0889984	0.726034	0.0898427	0.734542	0.0906878	0.743092	0.0915335	0.751685	0.0923798	0.717137	0.0888911	0.719554	0.0889715	0.717137	0.0890516			0.717505	0.0894295	0.710433	0.0902128	0.733638	0.0917689	0.736852	0.0915201	0.7356	0.0923133	0.71801	0.0897795
ConcSwap	FALSE			0.692692	0.0864437	0.701039	0.0872859	0.709427	0.0881287	0.717856	0.0889722	0.726327	0.0898163	0.734839	0.0906611	0.743394	0.0915065	0.75199	0.0923526	0.719554	0.0891324	0.721975	0.0892123	0.719554	0.0892933			0.714929	0.0892882	0.706522	0.0901071	0.729984	0.0917358	0.733342	0.0915051	0.732837	0.0922161	0.715963	0.0896864
1st Symbol-row	1			0.693048	0.0864256	0.7014	0.0872675	0.709793	0.0881102	0.718227	0.0889535	0.726703	0.0897974	0.735221	0.090642	0.74378	0.0914872	0.752382	0.0923332	0.721975	0.0893737	0.724399	0.0894532	0.721975	0.0895351			0.712496	0.0891325	0.702826	0.0899835	0.726232	0.091683	0.729739	0.0914735	0.730002	0.092099	0.714029	0.0895822
				0.693453	0.0864161	0.701811	0.087258	0.71021	0.0881005	0.71865	0.0889437	0.727132	0.0897876	0.735656	0.0906321	0.744222	0.0914772	0.75283	0.092323	0.724399	0.0896151	0.726826	0.0896942	0.724399	0.0897769			0.710252	0.0889653	0.699418	0.0898444	0.722415	0.0916109	0.726074	0.0914256	0.727118	0.0919629	0.712246	0.0894687
				0.693876	0.0864161	0.70224	0.087258	0.710645	0.0881005	0.719091	0.0889437	0.727579	0.0897876	0.736109	0.0906321	0.744682	0.0914772	0.753296	0.092323	0.726826	0.0898565	0.729256	0.0899353	0.726826	0.0900188			0.708241	0.08879	0.696363	0.0896924	0.718566	0.09152	0.722377	0.0913619	0.72421	0.0918089	0.710648	0.0893481
				0.694282	0.0864256	0.702651	0.0872675	0.711062	0.0881102	0.719514	0.0889535	0.728009	0.0897974	0.736545	0.090642	0.745123	0.0914872	0.753743	0.0923332	0.729256	0.090098	0.73169	0.0901763	0.729256	0.0902607			0.706503	0.0886099	0.693721	0.0895305	0.714718	0.0914111	0.71868	0.0912827	0.721303	0.0916384	0.709266	0.0892229
				0.694638	0.0864437	0.703012	0.0872859	0.711428	0.0881287	0.719886	0.0889722	0.728385	0.0898163	0.736926	0.0906611	0.74551	0.0915065	0.754136	0.0923526	0.73169	0.0903395	0.734128	0.0904175	0.73169	0.0905027			0.705072	0.0884286	0.691544	0.0893619	0.710902	0.0912852	0.715016	0.0911889	0.718421	0.0914528	0.708128	0.0890955
				0.694914	0.0864691	0.703293	0.0873116	0.711713	0.0881546	0.720174	0.0889984	0.728678	0.0898427	0.737223	0.0906878	0.745811	0.0915335	0.754441	0.0923798	0.734128	0.0905811	0.736569	0.0906587	0.734128	0.0907448			0.703974	0.0882496	0.689873	0.0891898	0.707153	0.0911433	0.711414	0.0910812	0.71559	0.0912537	0.707255	0.0889683
				0.69509	0.0864997	0.703471	0.0873424	0.711894	0.0881858	0.720358	0.0890299	0.728864	0.0898746	0.737412	0.0907199	0.746002	0.0915659	0.754635	0.0924126	0.736569	0.0908228	0.739013	0.0908999	0.736569	0.0909869			0.703233	0.0880764	0.688741	0.0890176	0.703502	0.0909867	0.707906	0.0909605	0.712834	0.0910428	0.706664	0.0888438
				0.69515	0.086533	0.703532	0.087376	0.711955	0.0882198	0.72042	0.0890642	0.728927	0.0899092	0.737476	0.0907549	0.746067	0.0916012	0.754701	0.0924482	0.739013	0.0910645	0.741461	0.0911412	0.739013	0.091229			0.702861	0.0879123	0.688171	0.0888487	0.699979	0.0908167	0.704522	0.090828	0.710175	0.0908219	0.706368	0.0887245
				ConcTikEll	ConcTikEll	ConcTikEll	ConcTikEll	ConcTikEll	ConcTikEll	ConcTikEll	ConcTikEll	ConcTikEll	ConcTikEll	ConcTikEll	ConcTikEll	ConcTikEll	ConcTikEll	ConcTikEll	ConcTikEll	0.741461	0.0913062	0.743912	0.0913826	0.741461	0.0914712			0.702866	0.0877605	0.688174	0.0886863	0.696615	0.0906347	0.701291	0.0906846	0.707637	0.0905928	0.706371	0.0886126
																				0.743912	0.091548	0.746367	0.091624	0.743912	0.0917135			0.703249	0.0876241	0.688748	0.0885337	0.69344	0.0904423	0.69824	0.0905316	0.705242	0.0903577	0.706674	0.0885104
																				0.746367	0.0917899	0.748825	0.0918654	0.746367	0.0919558			0.704002	0.0875056	0.689884	0.0883937	0.690479	0.0902412	0.695395	0.0903704	0.703009	0.0901183	0.70727	0.0884198
																				0.748825	0.0920318	0.751286	0.0921069	0.748825	0.0921982			0.705109	0.0874073	0.691559	0.088269	0.687758	0.0900329	0.69278	0.0902022	0.700958	0.0898769	0.708149	0.0883426
																				0.751286	0.0922738	0.753752	0.0923485	0.751286	0.0924406			0.70655	0.0873312	0.693741	0.0881622	0.6853	0.0898195	0.690419	0.0900286	0.699106	0.0896354	0.709293	0.0882803
																				0.753752	0.0925158	0.75622	0.0925901	0.753752	0.0926831			0.708297	0.0872788	0.696386	0.0880753	0.683127	0.0896025	0.68833	0.0898511	0.69747	0.0893959	0.710679	0.0882341
																				0.75622	0.0927579	0.758692	0.0928318	0.75622	0.0929256			0.710315	0.087251	0.699444	0.08801	0.681257	0.089384	0.686532	0.089671	0.696062	0.0891604	0.712282	0.0882049
																				0.758692	0.093	0.760414	0.093	0.756978	0.093			0.712565	0.0872485	0.702855	0.0879676	0.679705	0.0891657	0.68504	0.08949	0.694896	0.088931	0.714069	0.0881933
																				0.758692	0.093	ConcBand	ConcBand	ConcBand	ConcBand			0.715003	0.0872712	0.706553	0.0879488	0.678486	0.0889495	0.683867	0.0893097	0.69398	0.0887097	0.716005	0.0881995
																				IsoLine	IsoLine							0.717583	0.0873187	0.710465	0.0879541	0.677608	0.0887373	0.683023	0.0891315	0.693323	0.0884982	0.718054	0.0882233
																												0.720253	0.0873901	0.714516	0.0879834	0.677081	0.0885309	0.682515	0.088957	0.692931	0.0882985	0.720175	0.0882644
																												0.722962	0.087484	0.718626	0.088036	0.676908	0.088332	0.682348	0.0887876	0.692807	0.0881121	0.722327	0.0883219
																												0.725657	0.0875986	0.722716	0.088111	0.677091	0.0881424	0.682522	0.0886248	0.692951	0.0879408	0.724468	0.0883947
																												0.728286	0.0877316	0.726706	0.0882069	0.677628	0.0879636	0.683036	0.0884701	0.693363	0.0877859	0.726557	0.0884814
																												0.730796	0.0878805	0.730519	0.0883218	0.678515	0.0877972	0.683886	0.0883246	0.694039	0.0876488	0.728552	0.0885803
																												0.733141	0.0880424	0.73408	0.0884535	0.679745	0.0876446	0.685066	0.0881897	0.694974	0.0875307	0.730415	0.0886895
																												0.735273	0.088214	0.737319	0.0885994	0.681306	0.0875071	0.686563	0.0880665	0.696158	0.0874325	0.73211	0.0888068
																												0.737152	0.0883922	0.740175	0.0887567	0.683185	0.0873859	0.688367	0.0879561	0.697584	0.0873551	0.733604	0.0889299
																												0.738741	0.0885733	0.74259	0.0889224	0.685366	0.087282	0.690461	0.0878594	0.699237	0.0872992	0.734867	0.0890566
																												0.740008	0.0887539	0.744519	0.0890931	0.687832	0.0871962	0.692827	0.0877772	0.701104	0.0872652	0.735875	0.0891842
																												0.74093	0.0889304	0.745924	0.0892657	0.69056	0.0871294	0.695446	0.0877102	0.703169	0.0872535	0.736608	0.0893103
																												0.741488	0.0890995	0.746776	0.0894366	0.693527	0.0870821	0.698295	0.0876591	0.705414	0.0872641	0.737053	0.0894325
																												0.741672	0.0892578	0.747061	0.0896027	0.696708	0.0870547	0.70135	0.0876241	0.707821	0.0872969	0.7372	0.0895484
																												Black	Black	Black	Black	0.700077	0.0870475	0.704585	0.0876057	0.710369	0.0873517
																																0.703603	0.0870604	0.707971	0.087604	0.713036	0.087428
																																0.707258	0.0870934	0.711481	0.087619	0.715798	0.0875251
																																0.71101	0.0871462	0.715084	0.0876506	0.718634	0.0876422
																																0.714826	0.0872184	0.71875	0.0876985	0.721518	0.0877783
																																0.718675	0.0873093	0.722447	0.0877623	0.724426	0.0879323
																																0.722524	0.0874182	0.726143	0.0878414	0.727333	0.0881028
																																0.726339	0.0875441	0.729808	0.0879352	0.730214	0.0882884
																																0.730089	0.0876859	0.733409	0.0880429	0.733045	0.0884875
																																0.73374	0.0878425	0.736917	0.0881636	0.735802	0.0886984
																																0.737263	0.0880126	0.740301	0.0882962	0.73846	0.0889193
																																0.740626	0.0881945	0.743533	0.0884396	0.740998	0.0891484
																																0.743802	0.0883869	0.746584	0.0885925	0.743394	0.0893835
																																0.746763	0.0885881	0.749429	0.0887538	0.745627	0.0896229
																																0.749484	0.0887963	0.752043	0.0889219	0.747678	0.0898643
																																0.751941	0.0890098	0.754405	0.0890955	0.749529	0.0901058
																																0.754114	0.0892267	0.756493	0.0892731	0.751166	0.0903453
																																0.755985	0.0894453	0.758291	0.0894531	0.752573	0.0905808
																																0.757536	0.0896636	0.759783	0.0896341	0.75374	0.0908102
																																0.758756	0.0898797	0.760956	0.0898144	0.754655	0.0910315
																																0.759633	0.0900919	0.7618	0.0899926	0.755312	0.091243
																																0.760161	0.0902983	0.762308	0.0901672	0.755704	0.0914428
																																0.760334	0.0904972	0.762476	0.0903365	0.755829	0.0916291
																																Black	Black	Black	Black	Black	Black

[truncated: 2 more sheets: PlotDat9, Hoja3]
