# Supplementary material for: A tectonic carpet of Variscan flysch at the base of a rootless accretionary prism in northwestern Iberia: U–Pb zircon age constrains from sediments and volcanic olistoliths
Source: Copernicus journal article supplement (doi:10.5194/se-12-835-2021), 2021-04-15
Supplement: Supplementary file 5 [file se-12-835-2021-supplement.zip › SUPP TABLES/Supplementary Table 17_RAB1.xls]

## Sheet: PlotDat2
Source sheet	Data	0.601486	0.0759364	0.574259	0.0739651	0.589866	0.0756324	0.605627	0.0773023	0.621545	0.0789747	0.56412	0.073	0.565334	0.073	0.562912	0.073	0.557657	0.0723004	0.628933	0.0762392	0.633235	0.0774118	0.632703	0.0769013	0.626397	0.0769351	0.628362	0.0767051	0.62782	0.0766161	0.618883	0.076633	0.617445	0.07658	0.625575	0.0771457	0.632415	0.0772603	0.627567	0.0772527	0.639635	0.077089	0.624873	0.0771519	0.625662	0.0774659	0.642339	0.0772586
Plot name	Concordia0	0.600242	0.0759936	0.574211	0.0739934	0.589816	0.0756613	0.605576	0.0773318	0.621492	0.079005	0.56412	0.073	0.566348	0.0731094	0.56412	0.0731308	0.573073	0.0739651	0.628665	0.0763723	0.633086	0.0775878	0.632537	0.0770624	0.62626	0.077077	0.628048	0.0768906	0.627581	0.0767563	0.618703	0.0767521	0.617179	0.0767231	0.625333	0.0773124	0.632171	0.0774334	0.627373	0.0773936	0.639308	0.0772566	0.624601	0.0772715	0.625504	0.0775823	0.641954	0.077423
Plot Type	1	0.594615	0.0761244	0.574071	0.0740194	0.589672	0.0756879	0.605427	0.077359	0.621338	0.0790328	0.566348	0.0732406	0.568579	0.0733496	0.566348	0.0733719	0.588642	0.0756324	0.627867	0.076497	0.632658	0.0777502	0.632047	0.0772155	0.625856	0.0772112	0.627117	0.0770622	0.626872	0.0768859	0.618172	0.0768608	0.61639	0.0768566	0.62462	0.0774637	0.631452	0.0775895	0.626801	0.0775202	0.638335	0.0774132	0.62379	0.0773843	0.625042	0.0776863	0.640809	0.0775783
1st free col	59	0.595012	0.0761721	0.57385	0.0740409	0.589443	0.07571	0.605192	0.0773816	0.621096	0.0790559	0.568579	0.0734813	0.570814	0.0735899	0.568579	0.073613	0.604365	0.0773023	0.626556	0.0766107	0.631952	0.0778975	0.631239	0.0773594	0.625189	0.0773365	0.625587	0.0772166	0.625707	0.0770025	0.617301	0.076957	0.615093	0.0769779	0.623451	0.0775968	0.630274	0.0777256	0.625864	0.0776298	0.636737	0.0775558	0.622457	0.0774882	0.624285	0.0777759	0.638927	0.0777215
Sigma Level	2	0.596365	0.0761766	0.573566	0.0740564	0.58915	0.0757258	0.604889	0.0773978	0.620784	0.0790724	0.570814	0.073722	0.573052	0.0738302	0.570814	0.0738542	0.620244	0.0789747	0.624757	0.0767113	0.630976	0.0780287	0.630118	0.0774926	0.624264	0.0774519	0.623488	0.0773507	0.624109	0.0771037	0.616106	0.0770388	0.613313	0.0770845	0.621848	0.077709	0.62866	0.077839	0.62458	0.0777206	0.634543	0.0776816	0.620627	0.0775811	0.623248	0.0778494	0.636343	0.0778496
Absolute Errs	FALSE	0.603456	0.0762145	0.573242	0.0740644	0.588816	0.075734	0.604545	0.0774062	0.620429	0.079081	0.573052	0.0739628	0.575293	0.0740706	0.573052	0.0740954	IsoLine	IsoLine	0.622505	0.0767969	0.629738	0.0781424	0.628693	0.0776142	0.62309	0.0775564	0.620862	0.077462	0.622109	0.0771877	0.614611	0.0771047	0.611085	0.0771745	0.619842	0.0777981	0.626639	0.0779276	0.622973	0.0777906	0.631798	0.0777881	0.618337	0.0776612	0.62195	0.0779053	0.63311	0.0779603
Symbol Type	1	0.600679	0.0762194	0.572904	0.0740644	0.588468	0.075734	0.604185	0.0774062	0.620058	0.079081	0.575293	0.0742037	0.577537	0.074311	0.575293	0.0743367			0.619844	0.0768657	0.628249	0.0782379	0.626979	0.0777231	0.621676	0.0776491	0.617759	0.0775483	0.619746	0.0772527	0.612845	0.0771534	0.608452	0.0772461	0.617472	0.0778624	0.624253	0.0779895	0.621075	0.0778385	0.628554	0.0778734	0.615631	0.077727	0.620417	0.0779425	0.629288	0.0780513
Inverse Plot	FALSE	0.590296	0.0762277	0.57258	0.0740564	0.588133	0.0757258	0.603841	0.0773978	0.619703	0.0790724	0.577537	0.0744445	0.579784	0.0745515	0.577537	0.074578			0.616825	0.0769164	0.62652	0.0783142	0.624988	0.0778184	0.620035	0.0777291	0.614239	0.0776078	0.617066	0.0772975	0.610842	0.0771839	0.605466	0.0772978	0.614785	0.0779007	0.621547	0.0780236	0.618923	0.0778634	0.624874	0.0779356	0.612561	0.0777772	0.618679	0.0779604	0.624953	0.0781209
Color Plot	TRUE	0.601158	0.0765244	0.572296	0.0740409	0.58784	0.07571	0.603538	0.0773816	0.619391	0.0790559	0.579784	0.0746855	0.582035	0.0747921	0.579784	0.0748194			0.613508	0.076948	0.624567	0.0783707	0.622738	0.0778992	0.61818	0.0777959	0.610371	0.0776395	0.614121	0.0773212	0.608641	0.0771956	0.602185	0.0773287	0.611833	0.0779122	0.618574	0.0780293	0.616558	0.0778647	0.620831	0.0779737	0.609187	0.0778107	0.61677	0.0779585	0.620189	0.0781678
3D plot	FALSE	0.607829	0.0765608	0.572075	0.0740194	0.587612	0.0756879	0.603303	0.077359	0.619149	0.0790328	0.582035	0.0749265	0.584288	0.0750327	0.582035	0.0750609			0.609958	0.0769599	0.622406	0.0784069	0.620248	0.0779649	0.616128	0.0778489	0.606231	0.0776428	0.610969	0.0773234	0.606285	0.0771883	0.598672	0.0773382	0.608673	0.0778967	0.615392	0.0780064	0.614027	0.0778426	0.616502	0.0779869	0.605576	0.0778271	0.614726	0.0779369	0.615089	0.078191
Linear	FALSE	0.608016	0.0766555	0.571935	0.0739934	0.587468	0.0756613	0.603154	0.0773318	0.618995	0.079005	0.584288	0.0751675	0.586545	0.0752734	0.584288	0.0753024			0.606242	0.0769519	0.620057	0.0784225	0.617539	0.0780148	0.613895	0.0778875	0.601899	0.0776175	0.60767	0.0773039	0.60382	0.0771621	0.594997	0.077326	0.605367	0.0778545	0.612062	0.0779553	0.61138	0.0777973	0.611972	0.0779748	0.601796	0.0778258	0.612588	0.077896	0.609752	0.0781901
Data Range	H7:L24	0.606176	0.076693	0.571887	0.0739651	0.587418	0.0756324	0.603103	0.0773023	0.618942	0.0789747	0.586545	0.0754087	0.588805	0.0755141	0.586545	0.0755439			0.602433	0.0769242	0.617538	0.0784174	0.614635	0.0780486	0.611502	0.0779115	0.597459	0.0775641	0.604289	0.0772633	0.601294	0.0771177	0.591229	0.0772925	0.601978	0.0777864	0.60865	0.0778771	0.608667	0.0777298	0.607329	0.0779378	0.597923	0.077807	0.610397	0.0778367	0.604282	0.0781651
Filled Symbols	FALSE	0.596955	0.0769244	0.571935	0.0739368	0.587468	0.0756034	0.603154	0.0772727	0.618995	0.0789445	0.588805	0.0756498	0.591069	0.0757548	0.588805	0.0757856			0.598606	0.0768772	0.614872	0.0783916	0.61156	0.0780661	0.608967	0.0779206	0.592998	0.0774838	0.600892	0.0772023	0.598756	0.0770557	0.587444	0.0772383	0.598574	0.0776937	0.605223	0.0777733	0.605941	0.0776414	0.602664	0.0778766	0.59403	0.077771	0.608196	0.07776	0.598786	0.0781164
ConcAge	TRUE	0.609875	0.0769463	0.572075	0.0739108	0.587612	0.0755769	0.603303	0.0772455	0.619149	0.0789166	0.591069	0.075891	0.593335	0.0759957	0.591069	0.0760272			0.594836	0.0768119	0.612081	0.0783454	0.60834	0.0780669	0.606314	0.0779149	0.588602	0.077378	0.597545	0.077122	0.596256	0.0769774	0.583714	0.0771643	0.59522	0.0775783	0.601846	0.0776458	0.603255	0.0775338	0.598068	0.0777924	0.590195	0.0777185	0.606028	0.0776675	0.593369	0.0780452
ConcSwap	FALSE	0.602916	0.0769518	0.572296	0.0738893	0.58784	0.0755548	0.603538	0.0772229	0.619391	0.0788935	0.593335	0.0761323	0.595605	0.0762365	0.593335	0.0762689			0.591194	0.0767296	0.609189	0.0782791	0.605003	0.0780512	0.603564	0.0778942	0.584358	0.0772488	0.594313	0.0770241	0.593841	0.0768844	0.580112	0.0770722	0.591982	0.0774423	0.598585	0.0774973	0.600663	0.0774091	0.593629	0.0776867	0.586491	0.0776506	0.603935	0.0775609	0.588139	0.0779526
1st Symbol-row	1	0.602829	0.0769584	0.57258	0.0738738	0.588133	0.075539	0.603841	0.0772067	0.619703	0.078877	0.595605	0.0763736	0.597878	0.0764775	0.595605	0.0765107			0.587753	0.0766318	0.606221	0.0781933	0.601578	0.078019	0.600741	0.0778589	0.580347	0.0770988	0.591259	0.0769104	0.59156	0.0767785	0.576709	0.0769636	0.588922	0.0772885	0.595504	0.0773305	0.598213	0.0772698	0.589434	0.0775617	0.58299	0.0775686	0.601957	0.0774424	0.583196	0.0778405
		0.606115	0.0771987	0.572904	0.0738658	0.588468	0.0755307	0.604185	0.0771983	0.620058	0.0788684	0.597878	0.076615	0.600155	0.0767185	0.597878	0.0767525			0.58458	0.0765205	0.603201	0.0780887	0.598093	0.0779707	0.59787	0.0778092	0.576648	0.0769308	0.588442	0.0767832	0.589456	0.0766617	0.57357	0.0768407	0.5861	0.0771199	0.592663	0.0771487	0.595954	0.0771185	0.585565	0.0774198	0.579762	0.077474	0.600133	0.0773142	0.578637	0.0777112
		0.610024	0.0777259	0.573242	0.0738658	0.588816	0.0755307	0.604545	0.0771983	0.620429	0.0788684	0.600155	0.0768564	0.602434	0.0769595	0.600155	0.0769944			0.581735	0.0763978	0.600157	0.0779663	0.594579	0.0779066	0.594974	0.0777455	0.573332	0.0767481	0.585918	0.0766449	0.587571	0.0765362	0.570756	0.0767059	0.583572	0.0769396	0.590118	0.0769555	0.59393	0.0769582	0.582098	0.0772638	0.576868	0.0773687	0.598499	0.0771789	0.574551	0.077567
		IsoLine	IsoLine	0.573566	0.0738738	0.58915	0.075539	0.604889	0.0772067	0.620784	0.078877	0.602434	0.0770979	0.604717	0.0772006	0.602434	0.0772364			0.579275	0.0762662	0.597113	0.077827	0.591065	0.0778273	0.592078	0.0776684	0.570465	0.0765543	0.583735	0.0764983	0.58594	0.0764046	0.568323	0.0765617	0.581386	0.0767512	0.587917	0.0767547	0.59218	0.0767919	0.579099	0.0770966	0.574365	0.0772548	0.597087	0.077039	0.571016	0.0774109
				0.57385	0.0738893	0.589443	0.0755548	0.605192	0.0772229	0.621096	0.0788935	0.604717	0.0773395	0.607003	0.0774417	0.604717	0.0774783			0.577247	0.0761281	0.594096	0.0776721	0.587581	0.0777335	0.589207	0.0775786	0.568103	0.0763532	0.581935	0.0763461	0.584597	0.0762694	0.566317	0.0764111	0.579584	0.0765585	0.586104	0.07655	0.590739	0.0766231	0.576627	0.0769216	0.572302	0.0771344	0.595923	0.0768974	0.568103	0.0772459
				0.574071	0.0739108	0.589672	0.0755769	0.605427	0.0772455	0.621338	0.0789166	0.607003	0.0775811	0.609292	0.0776829	0.607003	0.0777204			0.575691	0.0759863	0.591131	0.0775028	0.584157	0.077626	0.586386	0.0774767	0.56629	0.0761486	0.580555	0.0761913	0.583567	0.0761332	0.564778	0.0762568	0.578203	0.0763651	0.584713	0.0763455	0.589634	0.0764548	0.57473	0.0767421	0.570719	0.07701	0.595031	0.0767566	0.565867	0.0770751
				0.574211	0.0739368	0.589816	0.0756034	0.605576	0.0772727	0.621492	0.0789445	0.609292	0.0778227	0.611585	0.0779242	0.609292	0.0779625			0.574637	0.0758435	0.588244	0.0773207	0.580823	0.0775056	0.583639	0.0773637	0.565062	0.0759445	0.57962	0.076037	0.582869	0.0759987	0.563736	0.0761021	0.577268	0.0761747	0.583773	0.0761453	0.588886	0.0762905	0.573445	0.0765617	0.569646	0.0768839	0.594428	0.0766196	0.564352	0.0769019
				0.574259	0.0739651	0.589866	0.0756324	0.605627	0.0773023	0.621545	0.0789747	0.611585	0.0780644	0.613881	0.0781655	0.611585	0.0782046			0.574105	0.0757025	0.585459	0.0771273	0.577606	0.0773735	0.580988	0.0772405	0.564444	0.075745	0.57915	0.0758861	0.582519	0.0758685	0.563211	0.0759497	0.576798	0.0759912	0.5833	0.0759531	0.588511	0.0761333	0.572798	0.0763838	0.569105	0.0767585	0.594125	0.076489	0.563588	0.0767297
				ConcTikEll	ConcTikEll	ConcTikEll	ConcTikEll	ConcTikEll	ConcTikEll	ConcTikEll	ConcTikEll	0.613881	0.0783062	0.61618	0.0784069	0.613881	0.0784469			0.574107	0.0755661	0.582801	0.0769242	0.574534	0.0772307	0.578457	0.0771082	0.564447	0.0755539	0.579152	0.0757417	0.582521	0.0757452	0.563213	0.0758028	0.576803	0.0758181	0.583306	0.0757728	0.588515	0.0759862	0.5728	0.076212	0.569106	0.0766364	0.594129	0.0763672	0.563589	0.0765619
												0.61618	0.078548	0.618482	0.0786483	0.61618	0.0786891			0.574641	0.0754369	0.580291	0.0767131	0.571633	0.0770784	0.576068	0.076968	0.565072	0.0753749	0.579627	0.0756064	0.582878	0.075631	0.563742	0.0756641	0.577281	0.0756587	0.583788	0.0756078	0.588899	0.0758522	0.573451	0.0760495	0.569649	0.0765199	0.59444	0.0762567	0.564356	0.0764016
												0.618482	0.0787899	0.620788	0.0788897	0.618482	0.0789314			0.575698	0.0753174	0.577951	0.0764959	0.568929	0.076918	0.57384	0.0768209	0.566305	0.0752115	0.580567	0.075483	0.58358	0.0755283	0.564788	0.0755364	0.578224	0.0755162	0.584738	0.0754613	0.589656	0.0757338	0.57474	0.0758995	0.570724	0.0764113	0.595051	0.0761596	0.565873	0.076252
												0.620788	0.0790318	0.623097	0.0791313	0.620788	0.0791738			0.577257	0.07521	0.575802	0.0762745	0.566444	0.0767509	0.571792	0.0766683	0.568124	0.0750669	0.581951	0.0753738	0.584616	0.0754391	0.56633	0.0754222	0.579614	0.0753933	0.586138	0.0753363	0.590769	0.0756333	0.57664	0.075765	0.572309	0.0763127	0.59595	0.0760779	0.568112	0.076116
												0.623097	0.0792737	0.625409	0.0793728	0.623097	0.0794162			0.579287	0.0751167	0.573861	0.0760506	0.564199	0.0765784	0.569943	0.0765115	0.570492	0.0749439	0.583755	0.075281	0.585964	0.075365	0.568339	0.0753236	0.581423	0.0752924	0.58796	0.075235	0.592218	0.0755528	0.579116	0.0756485	0.574374	0.076226	0.59712	0.076013	0.571027	0.0759964
												0.625409	0.0795158	0.627724	0.0796145	0.625409	0.0796587			0.58175	0.0750393	0.572145	0.0758262	0.562214	0.076402	0.568308	0.0763518	0.573364	0.0748449	0.585941	0.0752063	0.587599	0.0753076	0.570775	0.0752427	0.583616	0.0752154	0.590169	0.0751596	0.593975	0.0754937	0.582118	0.0755524	0.576878	0.0761529	0.598539	0.0759664	0.574564	0.0758953
												0.627724	0.0797579	0.630043	0.0798562	0.627724	0.0799012			0.584597	0.0749794	0.570669	0.0756033	0.560505	0.0762233	0.5669	0.0761905	0.576683	0.0747718	0.588469	0.0751513	0.589488	0.075268	0.573591	0.0751809	0.58615	0.075164	0.592721	0.0751115	0.596005	0.0754572	0.585588	0.0754785	0.579773	0.0760947	0.600179	0.0759387	0.578652	0.0758147
												0.630043	0.08	0.631425	0.08	0.628668	0.08			0.587772	0.0749381	0.569445	0.0753837	0.559087	0.0760437	0.565732	0.0760291	0.580386	0.074726	0.591288	0.075117	0.591595	0.0752468	0.576733	0.0751395	0.588977	0.0751391	0.595568	0.0750915	0.598269	0.075444	0.589459	0.0754282	0.583003	0.0760528	0.602007	0.0759307	0.583212	0.0757563
												0.630043	0.08	ConcBand	ConcBand	ConcBand	ConcBand			0.591214	0.0749163	0.568484	0.0751693	0.557972	0.0758648	0.564814	0.0758689	0.5844	0.0747085	0.594345	0.075104	0.593879	0.0752446	0.580138	0.0751192	0.59204	0.0751411	0.598653	0.0751002	0.600722	0.0754545	0.593656	0.0754025	0.586504	0.0760278	0.603988	0.0759425	0.588156	0.0757212
												IsoLine	IsoLine							0.594857	0.0749143	0.567794	0.0749619	0.55717	0.0756882	0.564154	0.0757113	0.588646	0.0747196	0.597578	0.0751126	0.596295	0.0752613	0.583741	0.0751206	0.595282	0.07517	0.601917	0.0751373	0.603318	0.0754883	0.598096	0.0754019	0.590208	0.0760202	0.606084	0.0759738	0.593388	0.07571
																				0.598628	0.0749322	0.567381	0.0747634	0.556687	0.0755152	0.563757	0.0755577	0.593043	0.074759	0.600926	0.0751427	0.598796	0.0752967	0.587471	0.0751435	0.598637	0.0752253	0.605296	0.0752021	0.606005	0.0755448	0.602693	0.0754265	0.594044	0.0760303	0.608254	0.0760241	0.598804	0.075723
																				0.602455	0.0749697	0.567248	0.0745753	0.556528	0.0753474	0.563627	0.0754092	0.597504	0.074826	0.604323	0.0751937	0.601334	0.0753501	0.591257	0.0751875	0.602042	0.0753059	0.608724	0.0752933	0.608731	0.0756229	0.607358	0.0754757	0.597937	0.0760578	0.610455	0.0760922	0.604301	0.0757599
																				0.606263	0.075026	0.567397	0.0743993	0.556694	0.0751863	0.563764	0.0752673	0.601944	0.0749193	0.607703	0.0752645	0.60386	0.0754204	0.595024	0.0752517	0.605429	0.0754102	0.612135	0.0754092	0.611443	0.0757211	0.612001	0.0755486	0.60181	0.0761021	0.612645	0.0761771	0.609771	0.0758201
																				0.609978	0.0751	0.567825	0.0742369	0.557183	0.0750332	0.564168	0.0751331	0.606274	0.0750371	0.611001	0.0753538	0.606323	0.0755062	0.598698	0.0753349	0.608733	0.0755362	0.615462	0.0755476	0.614089	0.0758376	0.616529	0.0756438	0.605589	0.0761624	0.614781	0.0762768	0.615107	0.0759022
																				0.613528	0.0751902	0.568531	0.0740896	0.557992	0.0748894	0.564835	0.0750078	0.610412	0.075177	0.614152	0.0754599	0.608677	0.0756059	0.60221	0.0754355	0.61189	0.0756814	0.61864	0.0757056	0.616616	0.0759699	0.620857	0.0757594	0.6092	0.0762376	0.616821	0.0763897	0.620206	0.0760048
																				0.616843	0.075295	0.569507	0.0739584	0.559113	0.0747561	0.56576	0.0748924	0.614276	0.0753364	0.617094	0.0755806	0.610875	0.0757176	0.605489	0.0755516	0.614838	0.075843	0.621608	0.0758803	0.618976	0.0761156	0.624898	0.0758932	0.612573	0.0763261	0.618727	0.0765133	0.624969	0.0761258
																				0.61986	0.0754123	0.570745	0.0738447	0.560537	0.0746345	0.566934	0.0747879	0.617792	0.0755122	0.619771	0.0757137	0.612875	0.075839	0.608473	0.0756808	0.617519	0.0760179	0.624308	0.0760682	0.621123	0.0762718	0.628575	0.0760425	0.615641	0.0764263	0.62046	0.0766454	0.629302	0.0762628
																				0.622519	0.0755398	0.572235	0.0737492	0.562252	0.0745256	0.568348	0.0746952	0.620891	0.0757009	0.622131	0.0758565	0.614637	0.0759679	0.611102	0.0758206	0.619883	0.0762027	0.626687	0.0762658	0.623014	0.0764355	0.631817	0.0762045	0.618346	0.0765362	0.621987	0.0767833	0.633122	0.0764133
																				0.624768	0.075675	0.573963	0.0736729	0.564243	0.0744303	0.569989	0.0746151	0.623512	0.0758988	0.624127	0.0760063	0.616127	0.0761016	0.613327	0.0759684	0.621881	0.0763937	0.628699	0.076469	0.624614	0.0766034	0.634559	0.076376	0.620635	0.0766536	0.623278	0.0769244	0.636353	0.0765743
																				0.626565	0.0758153	0.575916	0.0736164	0.566493	0.0743495	0.571844	0.0745484	0.625605	0.0761022	0.625721	0.0761602	0.617317	0.0762376	0.615104	0.0761212	0.623477	0.0765873	0.630304	0.0766741	0.62589	0.0767724	0.636748	0.0765537	0.622462	0.0767763	0.624309	0.077066	0.638934	0.0767426
																				0.627873	0.0759579	0.578077	0.0735802	0.568983	0.0742839	0.573896	0.0744954	0.627129	0.076307	0.626881	0.0763151	0.618183	0.0763733	0.616397	0.076276	0.624638	0.0767796	0.631473	0.0768769	0.626819	0.0769391	0.638343	0.0767341	0.623794	0.0769019	0.625058	0.0772052	0.640814	0.076915
																				0.628668	0.0761001	0.580426	0.0735646	0.571691	0.0742339	0.576129	0.0744568	0.628054	0.0765093	0.627585	0.076468	0.618708	0.0765059	0.617183	0.07643	0.625342	0.076967	0.632181	0.0770736	0.627382	0.0771002	0.639312	0.0769137	0.624603	0.0770279	0.625512	0.0773393	0.641956	0.0770881
																				0.628933	0.0762392	0.582945	0.0735697	0.574596	0.0742001	0.578522	0.0744328	0.628362	0.0767051	0.62782	0.0766161	0.618883	0.076633	0.617445	0.07658	0.625575	0.0771457	0.632415	0.0772603	0.627567	0.0772527	0.639635	0.077089	0.624873	0.0771519	0.625662	0.0774659	0.642339	0.0772586
																						0.585611	0.0735955	0.577671	0.0741827	0.581057	0.0744236
																						0.588402	0.0736417	0.58089	0.0741818	0.58371	0.0744294
																						0.591294	0.073708	0.584227	0.0741975	0.58646	0.07445
																						0.594262	0.0737938	0.587652	0.0742297	0.589283	0.0744854
																						0.597282	0.0738984	0.591137	0.074278	0.592154	0.0745351
																						0.600326	0.0740208	0.594652	0.0743421	0.59505	0.0745988
																						0.60337	0.0741601	0.598166	0.0744214	0.597946	0.0746759
																						0.606387	0.074315	0.60165	0.0745152	0.600817	0.0747657
																						0.609352	0.0744843	0.605073	0.0746228	0.603638	0.0748676
																						0.612239	0.0746664	0.608408	0.0747431	0.606385	0.0749806
																						0.615024	0.0748598	0.611625	0.0748753	0.609036	0.0751038
																						0.617682	0.0750629	0.614697	0.0750181	0.611567	0.075236
																						0.620192	0.075274	0.617597	0.0751703	0.613956	0.0753763
																						0.622532	0.0754912	0.620301	0.0753307	0.616184	0.0755234
																						0.624681	0.0757126	0.622787	0.0754978	0.618232	0.075676
																						0.626622	0.0759365	0.625032	0.0756703	0.620081	0.0758328
																						0.628338	0.0761609	0.627017	0.0758467	0.621716	0.0759925
																						0.629814	0.0763838	0.628726	0.0760254	0.623124	0.0761538
																						0.631038	0.0766034	0.630144	0.076205	0.624292	0.0763152
																						0.631999	0.0768178	0.631259	0.0763839	0.625209	0.0764754
																						0.632689	0.0770252	0.632061	0.0765606	0.62587	0.076633
																						0.633102	0.0772237	0.632544	0.0767335	0.626267	0.0767866
																						0.633235	0.0774118	0.632703	0.0769013	0.626397	0.0769351
[truncated: 8 more columns]

## Sheet: PlotDat0
Source sheet	Data	0.623322	0.0793059	0.605627	0.0773023	0.613567	0.0781382	0.621545	0.0789747	0.629563	0.0798119	0.637621	0.0806498	0.645718	0.0814883	0.653855	0.0823274	0.596795	0.0765	0.598091	0.0765	0.595505	0.0765	0.604365	0.0773023	0.660093	0.0802339	0.660896	0.0799063	0.661066	0.0797458	0.672369	0.0796877	0.658816	0.0806387	0.67173	0.0800971	0.641503	0.0804549	0.650056	0.0806604	0.680239	0.0806264	0.660667	0.0810098	0.668546	0.0812209	0.640415	0.0800033
Plot name	Concordia0	0.633208	0.0793419	0.605576	0.0773318	0.613515	0.0781681	0.621492	0.079005	0.629509	0.0798425	0.637566	0.0806807	0.645663	0.0815195	0.653799	0.082359	0.596795	0.0765	0.598901	0.0765858	0.596795	0.0766373	0.612285	0.0781382	0.659932	0.0804018	0.660623	0.0800788	0.660805	0.0798777	0.671962	0.079825	0.658647	0.0808236	0.671579	0.0802289	0.641294	0.080602	0.649851	0.0808159	0.680074	0.0807663	0.660412	0.0811846	0.668252	0.0813747	0.640271	0.0800775
Plot Type	1	0.634367	0.079436	0.605427	0.077359	0.613363	0.0781956	0.621338	0.0790328	0.629353	0.0798706	0.637408	0.0807091	0.645502	0.0815483	0.653636	0.0823881	0.598901	0.0767235	0.601009	0.0768089	0.598901	0.0768612	0.620244	0.0789747	0.659458	0.0805603	0.659816	0.0802369	0.660029	0.0800009	0.67075	0.0799557	0.658153	0.0809973	0.671134	0.0803548	0.640679	0.0807354	0.649251	0.0809541	0.679584	0.0809002	0.659659	0.0813434	0.667381	0.0815182	0.639847	0.0801444
1st free col	51	0.630609	0.0794903	0.605192	0.0773816	0.613124	0.0782184	0.621096	0.0790559	0.629107	0.079894	0.637158	0.0807327	0.645248	0.0815721	0.653379	0.0824122	0.601009	0.076947	0.603121	0.077032	0.601009	0.0770852	0.628242	0.0798119	0.658676	0.0807082	0.658491	0.0803776	0.658754	0.0801131	0.668757	0.0800773	0.657337	0.0811585	0.670397	0.0804737	0.639669	0.0808524	0.648268	0.0810722	0.678774	0.0810269	0.658425	0.0814829	0.665948	0.0816486	0.639153	0.0802022
Sigma Level	2	0.620501	0.0795209	0.604889	0.0773978	0.612817	0.0782348	0.620784	0.0790724	0.628791	0.0799107	0.636837	0.0807496	0.644922	0.0815892	0.653048	0.0824294	0.603121	0.0771706	0.605235	0.0772552	0.603121	0.0773092	0.636279	0.0806498	0.657593	0.0808441	0.656675	0.0804982	0.657003	0.0802122	0.666021	0.0801876	0.656207	0.0813056	0.669375	0.0805847	0.638286	0.0809508	0.646921	0.081168	0.67765	0.0811453	0.656733	0.0816006	0.663983	0.0817634	0.63821	0.0802492
Absolute Errs	FALSE	0.636988	0.0795355	0.604545	0.0774062	0.612467	0.0782433	0.620429	0.079081	0.62843	0.0799194	0.63647	0.0807584	0.64455	0.0815981	0.652671	0.0824384	0.605235	0.0773942	0.607352	0.0774785	0.605235	0.0775332	0.644357	0.0814883	0.656217	0.0809668	0.654401	0.0805963	0.654813	0.0802961	0.662596	0.0802842	0.654773	0.0814376	0.668077	0.0806866	0.636554	0.0810286	0.645237	0.0812395	0.676222	0.0812545	0.654615	0.0816942	0.661522	0.0818604	0.637042	0.0802843
Symbol Type	1	0.62043	0.0798949	0.604185	0.0774062	0.612102	0.0782433	0.620058	0.079081	0.628054	0.0799194	0.636089	0.0807584	0.644163	0.0815981	0.652277	0.0824384	0.607352	0.0776179	0.609471	0.0777018	0.607352	0.0777573	0.652474	0.0823274	0.65456	0.0810754	0.651715	0.0806699	0.652224	0.0803633	0.658548	0.0803655	0.653046	0.0815532	0.666514	0.0807788	0.634509	0.0810844	0.643248	0.0812854	0.674502	0.0813534	0.652114	0.0817618	0.658615	0.0819376	0.635682	0.0803064
Inverse Plot	FALSE	0.629573	0.0799232	0.603841	0.0773978	0.611752	0.0782348	0.619703	0.0790724	0.627693	0.0799107	0.635722	0.0807496	0.643791	0.0815892	0.6519	0.0824294	0.609471	0.0778416	0.611594	0.0779252	0.609471	0.0779814	IsoLine	IsoLine	0.652637	0.0811689	0.648669	0.0807177	0.649288	0.0804125	0.653957	0.0804296	0.651041	0.0816514	0.664698	0.0808603	0.63219	0.081117	0.640992	0.0813048	0.672505	0.0814413	0.649277	0.081802	0.655317	0.0819936	0.634166	0.0803149
Color Plot	TRUE	0.642017	0.0800586	0.603538	0.0773816	0.611445	0.0782184	0.619391	0.0790559	0.627377	0.079894	0.635401	0.0807327	0.643465	0.0815721	0.651569	0.0824122	0.611594	0.0780654	0.613719	0.0781486	0.611594	0.0782056			0.650464	0.0812465	0.645322	0.0807387	0.646061	0.0804426	0.648911	0.0804755	0.648776	0.0817315	0.662647	0.0809306	0.629642	0.0811258	0.638514	0.0812973	0.670248	0.0815174	0.64616	0.0818142	0.651694	0.0820272	0.632537	0.0803097
3D plot	FALSE	0.63489	0.0803595	0.603303	0.077359	0.611206	0.0781956	0.619149	0.0790328	0.62713	0.0798706	0.635151	0.0807091	0.643212	0.0815483	0.651312	0.0823881	0.613719	0.0782892	0.615847	0.078372	0.613719	0.0784298			0.64806	0.0813075	0.641739	0.0807325	0.642607	0.0804531	0.643509	0.0805022	0.646269	0.0817927	0.660376	0.0809889	0.626914	0.0811106	0.635862	0.0812631	0.66775	0.0815811	0.642824	0.0817981	0.647814	0.0820379	0.630837	0.0802908
Linear	FALSE	0.638562	0.0808463	0.603154	0.0773318	0.611055	0.0781681	0.618995	0.079005	0.626974	0.0798425	0.634993	0.0806807	0.643051	0.0815195	0.651148	0.082359	0.615847	0.0785131	0.617978	0.0785955	0.615847	0.0786541			0.645444	0.0813515	0.637991	0.0806993	0.638992	0.0804439	0.637856	0.0805093	0.643543	0.0818346	0.657906	0.0810349	0.62406	0.0810718	0.633088	0.0812027	0.665033	0.0816318	0.639334	0.081754	0.643755	0.0820254	0.629115	0.0802588
Data Range	H25:L35	IsoLine	IsoLine	0.603103	0.0773023	0.611003	0.0781382	0.618942	0.0789747	0.626921	0.0798119	0.634938	0.0806498	0.642995	0.0814883	0.651092	0.0823274	0.617978	0.078737	0.620112	0.078819	0.617978	0.0788784			0.64264	0.081378	0.634149	0.0806396	0.635287	0.080415	0.632062	0.0804964	0.64062	0.0818567	0.655257	0.081068	0.621136	0.0810101	0.630245	0.0811175	0.662119	0.081669	0.635757	0.0816827	0.639594	0.0819899	0.627416	0.0802146
Filled Symbols	FALSE			0.603154	0.0772727	0.611055	0.0781082	0.618995	0.0789445	0.626974	0.0797813	0.634993	0.0806188	0.643051	0.081457	0.651148	0.0822958	0.620112	0.0789609	0.622249	0.0790426	0.620112	0.0791028			0.63967	0.0813869	0.630288	0.0805547	0.631564	0.0803671	0.626239	0.080464	0.637526	0.0818588	0.652453	0.0810881	0.618198	0.0809267	0.62739	0.081009	0.659033	0.0816925	0.632163	0.0815857	0.635414	0.0819322	0.625787	0.0801593
ConcAge	TRUE			0.603303	0.0772455	0.611206	0.0780807	0.619149	0.0789166	0.62713	0.0797532	0.635151	0.0805904	0.643212	0.0814283	0.651312	0.0822668	0.622249	0.0791849	0.624388	0.0792662	0.622249	0.0793272			0.636562	0.0813779	0.626485	0.0804462	0.627896	0.0803011	0.620502	0.0804127	0.634286	0.081841	0.649516	0.0810949	0.615303	0.0808232	0.624576	0.0808794	0.655803	0.0817021	0.628622	0.0814648	0.631295	0.0818533	0.624272	0.0800944
ConcSwap	FALSE			0.603538	0.0772229	0.611445	0.0780579	0.619391	0.0788935	0.627377	0.0797299	0.635401	0.0805668	0.643465	0.0814044	0.651569	0.0822427	0.624388	0.079409	0.62653	0.0794899	0.624388	0.0795517			0.63334	0.0813513	0.622812	0.0803162	0.624354	0.0802182	0.614961	0.0803434	0.630929	0.0818035	0.646473	0.0810884	0.612509	0.0807017	0.62186	0.0807312	0.652455	0.0816977	0.625203	0.0813224	0.627317	0.0817548	0.622914	0.0800218
1st Symbol-row	1			0.603841	0.0772067	0.611752	0.0780415	0.619703	0.078877	0.627693	0.0797131	0.635722	0.0805499	0.643791	0.0813874	0.6519	0.0822254	0.62653	0.079633	0.628675	0.0797136	0.62653	0.0797762			0.630033	0.0813073	0.619342	0.0801672	0.621007	0.0801201	0.609725	0.0802575	0.627482	0.0817464	0.643349	0.0810687	0.609868	0.0805644	0.619294	0.0805672	0.649018	0.0816792	0.621973	0.0811613	0.623558	0.0816387	0.621748	0.0799434
				0.604185	0.0771983	0.612102	0.078033	0.620058	0.0788684	0.628054	0.0797044	0.636089	0.0805411	0.644163	0.0813785	0.652277	0.0822164	0.628675	0.0798572	0.630823	0.0799374	0.628675	0.0800007			0.626668	0.0812462	0.616142	0.0800021	0.61792	0.0800086	0.604895	0.0801567	0.623976	0.0816704	0.64017	0.0810359	0.607433	0.0804141	0.616928	0.0803908	0.645521	0.081647	0.618994	0.0809845	0.620091	0.0815071	0.620807	0.0798613
				0.604545	0.0771983	0.612467	0.078033	0.620429	0.0788684	0.62843	0.0797044	0.63647	0.0805411	0.64455	0.0813785	0.652671	0.0822164	0.630823	0.0800814	0.632974	0.0801612	0.630823	0.0802254			0.623275	0.0811685	0.613274	0.0798243	0.615152	0.0798861	0.600566	0.0800428	0.620441	0.081576	0.636965	0.0809903	0.605251	0.0802537	0.614809	0.0802052	0.641994	0.0816012	0.616325	0.0807956	0.616983	0.0813626	0.620117	0.0797778
				0.604889	0.0772067	0.612817	0.0780415	0.620784	0.078877	0.628791	0.0797131	0.636837	0.0805499	0.644922	0.0813874	0.653048	0.0822254	0.632974	0.0803056	0.635127	0.0803851	0.632974	0.08045			0.619883	0.0810749	0.610794	0.079637	0.612759	0.0797547	0.596822	0.0799183	0.616906	0.0814641	0.633759	0.0809323	0.603364	0.0800863	0.612976	0.0800141	0.638467	0.0815422	0.614017	0.0805982	0.614296	0.0812081	0.619695	0.0796952
				0.605192	0.0772229	0.613124	0.0780579	0.621096	0.0788935	0.629107	0.0797299	0.637158	0.0805668	0.645248	0.0814044	0.653379	0.0822427	0.635127	0.0805299	0.637284	0.080609	0.635127	0.0806747			0.61652	0.0809662	0.60875	0.079444	0.610787	0.0796172	0.593735	0.0797854	0.613401	0.0813356	0.630581	0.0808623	0.601809	0.0799152	0.611467	0.0798213	0.634971	0.0814706	0.612115	0.0803962	0.612081	0.0810466	0.619554	0.0796157
				0.605427	0.0772455	0.613363	0.0780807	0.621338	0.0789166	0.629353	0.0797532	0.637408	0.0805904	0.645502	0.0814283	0.653636	0.0822668	0.637284	0.0807542	0.639443	0.0808329	0.637284	0.0808994			0.613214	0.0808434	0.607182	0.0792489	0.609273	0.0794761	0.591366	0.0796468	0.609958	0.0811917	0.627458	0.0807811	0.600617	0.0797437	0.61031	0.0796304	0.631534	0.0813869	0.610656	0.0801934	0.610381	0.0808812	0.619698	0.0795415
				0.605576	0.0772727	0.613515	0.0781082	0.621492	0.0789445	0.629509	0.0797813	0.637566	0.0806188	0.645663	0.081457	0.653799	0.0822958	0.639443	0.0809786	0.641605	0.0810569	0.639443	0.0811242			0.609996	0.0807075	0.606121	0.0790557	0.608248	0.0793343	0.58976	0.0795051	0.606604	0.0810334	0.624416	0.0806892	0.599811	0.0795751	0.609528	0.0794452	0.628188	0.0812919	0.609669	0.0799938	0.60923	0.0807151	0.620122	0.0794746
				0.605627	0.0773023	0.613567	0.0781382	0.621545	0.0789747	0.629563	0.0798119	0.637621	0.0806498	0.645718	0.0814883	0.653855	0.0823274	0.641605	0.081203	0.64377	0.081281	0.641605	0.0813491			0.60689	0.0805596	0.605587	0.0788681	0.607731	0.0791944	0.58895	0.0793631	0.603369	0.0808623	0.621481	0.0805874	0.599406	0.0794128	0.609136	0.0792694	0.624959	0.0811864	0.609173	0.0798014	0.60865	0.0805515	0.620816	0.0794169
				ConcTikEll	ConcTikEll	ConcTikEll	ConcTikEll	ConcTikEll	ConcTikEll	ConcTikEll	ConcTikEll	ConcTikEll	ConcTikEll	ConcTikEll	ConcTikEll	ConcTikEll	ConcTikEll	0.64377	0.0814275	0.645937	0.081505	0.64377	0.0815739			0.603925	0.080401	0.60559	0.0786897	0.607732	0.0790593	0.588951	0.0792236	0.600279	0.0806797	0.618679	0.0804767	0.59941	0.0792598	0.609142	0.0791062	0.621875	0.0810712	0.609178	0.0796199	0.608652	0.0803937	0.621759	0.0793698
																		0.645937	0.081652	0.648108	0.0817292	0.645937	0.0817989			0.601126	0.080233	0.606132	0.078524	0.608252	0.0789314	0.589762	0.0790893	0.597363	0.0804873	0.616033	0.080358	0.599823	0.0791192	0.609545	0.078959	0.618964	0.0809474	0.609683	0.0794527	0.609236	0.0802447	0.622927	0.0793348
																		0.648108	0.0818765	0.650281	0.0819534	0.648108	0.0820238			0.598516	0.0800572	0.6072	0.0783742	0.609281	0.0788134	0.591369	0.0789628	0.594644	0.0802866	0.613566	0.0802322	0.600637	0.0789937	0.610339	0.0788306	0.616249	0.080816	0.610679	0.0793032	0.610391	0.0801074	0.624287	0.0793127
																		0.650281	0.0821011	0.652458	0.0821776	0.650281	0.0822489			0.596117	0.0798749	0.608774	0.0782433	0.610797	0.0787075	0.593739	0.0788466	0.592145	0.0800793	0.611298	0.0801006	0.601837	0.0788858	0.611506	0.0787234	0.613754	0.0806782	0.612146	0.0791742	0.612094	0.0799844	0.625803	0.0793041
																		0.652458	0.0823258	0.654637	0.0824019	0.652458	0.0824739			0.593951	0.0796878	0.610824	0.0781337	0.612773	0.0786158	0.596827	0.0787429	0.589888	0.0798673	0.60925	0.079964	0.603398	0.0787975	0.613026	0.0786395	0.6115	0.0805351	0.614055	0.0790683	0.614313	0.0798783	0.627432	0.0793093
																		0.654637	0.0825505	0.656819	0.0826262	0.654637	0.0826991			0.592035	0.0794974	0.61331	0.0780476	0.615168	0.0785401	0.600572	0.0786537	0.587893	0.0796524	0.607438	0.0798239	0.605291	0.0787305	0.614867	0.0785807	0.609507	0.0803879	0.61637	0.0789876	0.617003	0.079791	0.629132	0.0793282
																		0.656819	0.0827752	0.659004	0.0828506	0.656819	0.0829242			0.590386	0.0793054	0.616183	0.0779868	0.617937	0.0784817	0.604903	0.0785809	0.586176	0.0794363	0.605878	0.0796812	0.607479	0.0786862	0.616995	0.0785479	0.607791	0.0802379	0.619046	0.0789335	0.620113	0.0797242	0.630854	0.0793602
																		0.659004	0.083	0.660461	0.083	0.657554	0.083			0.589018	0.0791134	0.619387	0.0779523	0.621026	0.078442	0.609733	0.0785257	0.584751	0.0792209	0.604584	0.0795373	0.609918	0.0786655	0.619367	0.078542	0.606367	0.0800864	0.62203	0.0789072	0.623582	0.0796793	0.632553	0.0794045
																		0.659004	0.083	ConcBand	ConcBand	ConcBand	ConcBand			0.587943	0.078923	0.622861	0.0779448	0.624375	0.0784216	0.61497	0.0784893	0.583632	0.0790081	0.603566	0.0793935	0.612563	0.0786686	0.621938	0.0785629	0.605247	0.0799346	0.625264	0.0789092	0.627343	0.0796571	0.634182	0.0794598
																		IsoLine	IsoLine							0.587169	0.0787359	0.626536	0.0779646	0.627918	0.0784209	0.620511	0.0784724	0.582827	0.0787997	0.602834	0.0792508	0.61536	0.0786957	0.624658	0.0786103	0.604441	0.0797839	0.628686	0.0789394	0.631322	0.079658	0.635697	0.0795246
																										0.586705	0.0785537	0.63034	0.0780112	0.631587	0.07844	0.626248	0.0784753	0.582343	0.0785974	0.602393	0.0791105	0.618256	0.0787461	0.627473	0.0786832	0.603955	0.0796355	0.632228	0.0789972	0.635442	0.0796821	0.637055	0.0795973
																										0.586552	0.0783779	0.634201	0.0780836	0.63531	0.0784785	0.632071	0.0784979	0.582186	0.078403	0.602247	0.0789739	0.621194	0.0788188	0.630329	0.0787803	0.603794	0.0794908	0.635822	0.0790816	0.639623	0.0797288	0.638221	0.0796757
																										0.586713	0.07821	0.638042	0.0781806	0.639014	0.0785357	0.637865	0.0785399	0.582355	0.0782182	0.602397	0.0788421	0.624118	0.0789125	0.633171	0.0788997	0.603959	0.0793509	0.639398	0.0791908	0.643783	0.0797973	0.639162	0.0797577
																										0.587187	0.0780514	0.641789	0.0783001	0.642628	0.0786103	0.643518	0.0786004	0.582849	0.0780444	0.602842	0.0787161	0.62697	0.0790253	0.635942	0.0790389	0.604449	0.079217	0.642887	0.0793227	0.647841	0.0798862	0.639852	0.0798412
																										0.587969	0.0779036	0.645369	0.07844	0.646081	0.078701	0.64892	0.0786782	0.583665	0.0778833	0.603579	0.0785972	0.629694	0.079155	0.63859	0.0791954	0.605259	0.0790903	0.646219	0.0794749	0.651719	0.0799937	0.640274	0.0799238
																										0.589052	0.0777677	0.648713	0.0785974	0.649306	0.078806	0.653965	0.0787718	0.584795	0.0777361	0.604601	0.0784863	0.632238	0.0792992	0.641062	0.079366	0.606383	0.0789719	0.649332	0.0796443	0.655341	0.0801179	0.640415	0.0800033
																										0.590428	0.077645	0.651754	0.0787692	0.652241	0.0789233	0.658555	0.0788794	0.586229	0.0776042	0.605899	0.0783843	0.634552	0.0794549	0.64331	0.0795475	0.607811	0.0788627	0.652163	0.0798275	0.658636	0.0802563	Cyan	Cyan
																										0.592084	0.0775364	0.654435	0.0789523	0.654827	0.0790506	0.662602	0.0789989	0.587956	0.0774886	0.607463	0.0782922	0.636592	0.0796192	0.645291	0.0797363	0.609531	0.0787638	0.654657	0.0800212	0.66154	0.0804061
																										0.594007	0.0774429	0.656702	0.0791429	0.657015	0.0791854	0.666026	0.0791279	0.589961	0.0773903	0.609278	0.0782106	0.638317	0.0797889	0.646966	0.0799287	0.611528	0.0786759	0.656768	0.0802214	0.663998	0.0805645
																										0.59618	0.0773653	0.658513	0.0793374	0.658763	0.079325	0.668761	0.079264	0.592226	0.0773102	0.61133	0.0781404	0.639693	0.0799606	0.648302	0.080121	0.613785	0.0785998	0.658452	0.0804243	0.66596	0.0807284
																										0.598585	0.0773042	0.65983	0.079532	0.660035	0.0794668	0.670753	0.0794045	0.594732	0.077249	0.6136	0.078082	0.640695	0.080131	0.649274	0.0803095	0.616283	0.0785361	0.659678	0.0806259	0.667389	0.0808946
																										0.601201	0.0772603	0.66063	0.0797228	0.660808	0.079608	0.671963	0.0795467	0.597459	0.0772072	0.61607	0.0780361	0.641302	0.0802969	0.649863	0.0804905	0.619001	0.0784854	0.660421	0.0808224	0.668256	0.0810598
																										0.604005	0.0772338	0.660896	0.0799063	0.661066	0.0797458	0.672369	0.0796877	0.600381	0.0771851	0.618719	0.0780029	0.641503	0.0804549	0.650056	0.0806604	0.621914	0.0784482	0.660667	0.0810098	0.668546	0.0812209
																										0.606974	0.0772249							0.603476	0.0771829	0.621524	0.0779829					0.625	0.0784247
																										0.610083	0.0772339							0.606716	0.0772007	0.62446	0.077976					0.62823	0.0784151
																										0.613305	0.0772605							0.610073	0.0772383	0.627503	0.0779825					0.631579	0.0784195
																										0.616612	0.0773045							0.613519	0.0772953	0.630628	0.0780023					0.635016	0.078438
																										0.619976	0.0773656							0.617025	0.0773714	0.633806	0.0780351					0.638513	0.0784702
																										0.623369	0.0774433							0.620561	0.0774657	0.637012	0.0780807					0.64204	0.078516
																										0.626762	0.0775369							0.624096	0.0775776	0.640217	0.0781387					0.645566	0.078575
																										0.630125	0.0776456							0.6276	0.0777061	0.643395	0.0782086					0.649063	0.0786466
																										0.63343	0.0777684							0.631044	0.0778501	0.646518	0.0782899					0.652499	0.0787303
																										0.636649	0.0779043							0.634398	0.0780083	0.64956	0.0783818					0.655846	0.0788253
																										0.639754	0.0780522							0.637633	0.0781795	0.652495	0.0784835					0.659074	0.0789308
																										0.642719	0.0782108							0.640722	0.078362	0.655297	0.0785942					0.662158	0.079046
																										0.645519	0.0783788							0.643639	0.0785545	0.657943	0.078713					0.665069	0.0791698
																										0.648129	0.0785546							0.646358	0.0787552	0.660411	0.0788387					0.667784	0.0793012
																										0.650528	0.0787369							0.648857	0.0789624	0.662678	0.0789704					0.670279	0.079439
																										0.652694	0.078924							0.651113	0.0791744	0.664727	0.0791069					0.672533	0.0795821
																										0.65461	0.0791144							0.653109	0.0793894	0.666538	0.0792471					0.674526	0.0797293
																										0.656259	0.0793064							0.654826	0.0796055	0.668098	0.0793897					0.676242	0.0798793
																										0.657627	0.0794984							0.65625	0.0798208	0.669392	0.0795336					0.677667	0.0800308
																										0.658702	0.0796888							0.65737	0.0800336	0.67041	0.0796775					0.678787	0.0801826
																										0.659475	0.0798759							0.658175	0.0802421	0.671142	0.0798202					0.679593	0.0803333
																										0.65994	0.0800581							0.658658	0.0804443	0.671584	0.0799604					0.680078	0.0804817
																										0.660093	0.0802339							0.658816	0.0806387	0.67173	0.0800971					0.680239	0.0806264

## Sheet: PlotDat1
Source sheet	Data	0.601486	0.0759364	0.491543	0.065	0.482812	0.0640155	0.628933	0.0762392	0.633235	0.0774118	0.632703	0.0769013	0.626397	0.0769351	0.628362	0.0767051	0.62782	0.0766161	0.618883	0.076633	0.617445	0.07658	0.625575	0.0771457	0.632415	0.0772603	0.627567	0.0772527	0.639635	0.077089	0.624873	0.0771519	0.625662	0.0774659	0.642339	0.0772586	0.628431	0.07793	0.631226	0.0781957	0.632291	0.0782127	0.660093	0.0802339	0.660896	0.0799063	0.661066	0.0797458
Plot name	Concordia0	0.600242	0.0759936	0.491543	0.065	0.512308	0.0673218	0.627818	0.0765024	0.632496	0.077791	0.631863	0.0772548	0.625703	0.0772455	0.627658	0.0769783	0.626828	0.0768915	0.61814	0.0768654	0.616342	0.0768624	0.625035	0.0773902	0.63187	0.0775138	0.626766	0.0775255	0.638901	0.0773364	0.62374	0.0773893	0.625014	0.0776907	0.641475	0.077502	0.62786	0.0782186	0.630666	0.0784811	0.631382	0.0784939	0.659279	0.0806009	0.660285	0.0801598	0.659982	0.0800062
Plot Type	1	0.594615	0.0761244	0.508076	0.0668508	0.542391	0.0706383	0.62457	0.0767198	0.630348	0.0780916	0.629395	0.077559	0.623668	0.0775091	0.625587	0.0772166	0.623943	0.0771121	0.615982	0.0770455	0.613128	0.0770934	0.623451	0.0775968	0.630274	0.0777256	0.624446	0.0777278	0.636737	0.0775558	0.620438	0.077589	0.62314	0.0778552	0.638927	0.0777215	0.626194	0.0784522	0.629032	0.0787105	0.628743	0.0787129	0.656895	0.0809113	0.658491	0.0803776	0.656822	0.0802204
1st free col	83	0.595012	0.0761721	0.524793	0.0687048	0.573073	0.0739651	0.619452	0.0768737	0.626884	0.0783005	0.625407	0.0778005	0.620381	0.0777142	0.622238	0.0774094	0.619398	0.07726	0.612585	0.0771586	0.608065	0.0772543	0.620893	0.0777565	0.627698	0.0778865	0.620795	0.0778432	0.633237	0.0777374	0.615232	0.0777348	0.620191	0.0779461	0.634804	0.0779073	0.623508	0.0786204	0.626396	0.0788738	0.624588	0.078852	0.653043	0.0811515	0.655593	0.0805502	0.651843	0.0803711
Sigma Level	2	0.596365	0.0761766	0.541694	0.0705621	0.604365	0.0773023	0.612878	0.0769516	0.622255	0.0784086	0.620074	0.0779687	0.615984	0.0778519	0.617759	0.0775483	0.613562	0.0773232	0.608223	0.0771957	0.601562	0.077332	0.617472	0.0778624	0.624253	0.0779895	0.616109	0.0778625	0.628554	0.0778734	0.608546	0.077815	0.616407	0.077956	0.629288	0.0780513	0.619918	0.078716	0.622874	0.078964	0.619253	0.0788998	0.647892	0.081311	0.651715	0.0806699	0.645448	0.080446
Absolute Errs	FALSE	0.603456	0.0762145	0.558783	0.0724226	0.636279	0.0806498	0.605382	0.0769474	0.616665	0.0784111	0.613627	0.0780563	0.610671	0.0779162	0.612344	0.0776272	0.606906	0.0772966	0.60325	0.0771536	0.594146	0.0773203	0.613339	0.0779098	0.62009	0.07803	0.610767	0.0777839	0.622893	0.0779577	0.600921	0.0778231	0.612093	0.0778841	0.622619	0.0781473	0.615581	0.0787348	0.61862	0.0789769	0.61317	0.0788525	0.641667	0.0813829	0.647029	0.0807316	0.638155	0.080439
Symbol Type	1	0.600679	0.0762194	0.576062	0.0742863	0.668829	0.0840077	0.597569	0.0768612	0.610356	0.078308	0.60635	0.0780595	0.604674	0.0779043	0.606231	0.0776428	0.599971	0.0771823	0.598069	0.0770359	0.586418	0.07722	0.608673	0.0778967	0.615392	0.0780064	0.605202	0.0776139	0.616502	0.0779869	0.592975	0.0777583	0.6076	0.0777363	0.615089	0.078191	0.610687	0.078676	0.613819	0.0789122	0.606832	0.0787139	0.63464	0.0813641	0.641739	0.0807325	0.630556	0.0803508
Inverse Plot	FALSE	0.590296	0.0762277	0.593532	0.0761532	0.702025	0.087376	0.590075	0.0767001	0.603606	0.0781037	0.59856	0.0779781	0.598255	0.0778167	0.599687	0.0775943	0.593319	0.0769896	0.593099	0.076852	0.579005	0.0770393	0.603679	0.0778236	0.610362	0.0779195	0.599865	0.0773663	0.609659	0.0779594	0.585351	0.077626	0.603291	0.0775244	0.607027	0.0781806	0.605449	0.078542	0.608682	0.0787725	0.600753	0.0784953	0.627119	0.0812553	0.636077	0.0806727	0.623265	0.0801885
Color Plot	TRUE	0.601158	0.0765244	0.611196	0.0780234	0.735883	0.0907549	0.583504	0.0764771	0.596708	0.0778072	0.590598	0.0778156	0.591693	0.0776572	0.592998	0.0774838	0.587488	0.0767341	0.588743	0.0766169	0.572506	0.0767929	0.598574	0.0776937	0.605223	0.0777733	0.595189	0.0770611	0.602664	0.0778766	0.578668	0.0774368	0.599515	0.0772657	0.598786	0.0781164	0.600096	0.0783389	0.603432	0.0785641	0.595426	0.0782143	0.619432	0.0810613	0.630288	0.0805547	0.616873	0.0799652
3D plot	FALSE	0.607829	0.0765608	0.629055	0.0798968	0.770413	0.0941442	0.578391	0.0762103	0.589965	0.0774315	0.582811	0.0775793	0.585277	0.0774328	0.586456	0.0773162	0.58295	0.0764365	0.585354	0.0763496	0.567448	0.0765007	0.593583	0.0775127	0.600197	0.077574	0.591552	0.076723	0.595823	0.0777421	0.573466	0.0772062	0.596579	0.0769811	0.590724	0.0780014	0.594864	0.0780755	0.5983	0.078296	0.59128	0.0778938	0.611915	0.0807905	0.624628	0.0803837	0.611899	0.0796991
Linear	FALSE	0.608016	0.0766555	0.647112	0.0817735	0.805631	0.097544	0.575148	0.0759213	0.583671	0.0769928	0.57554	0.0772794	0.579286	0.0771533	0.580347	0.0770988	0.580073	0.0761209	0.583207	0.0760717	0.564242	0.0761864	0.588922	0.0772885	0.595504	0.0773305	0.589248	0.0763795	0.589434	0.0775617	0.570166	0.0769527	0.59472	0.0766937	0.583196	0.0778405	0.589979	0.0777632	0.593509	0.0779799	0.588654	0.0775597	0.604896	0.0804549	0.619342	0.0801672	0.608745	0.0794116
Data Range	H7:L43	0.606176	0.076693	0.66537	0.0836535	0.841549	0.100954	0.574039	0.0756336	0.578102	0.0765106	0.569103	0.076929	0.573983	0.0768309	0.574938	0.0768411	0.579091	0.0758129	0.582476	0.0758058	0.563146	0.0758754	0.584796	0.077031	0.591351	0.0770533	0.588466	0.0760583	0.583777	0.0773434	0.569038	0.0766969	0.594089	0.0764268	0.57653	0.0776408	0.585656	0.0774157	0.589269	0.0776297	0.587758	0.077239	0.598683	0.0800691	0.614663	0.0799146	0.607667	0.0791261
Filled Symbols	FALSE	0.596955	0.0769244	0.68383	0.0855367	0.878181	0.104375	0.575154	0.0753704	0.573499	0.0760057	0.56378	0.0765434	0.569598	0.0764797	0.570465	0.0765543	0.580083	0.0755375	0.583219	0.0755735	0.564249	0.0755929	0.581386	0.0767512	0.587917	0.0767547	0.589267	0.0757855	0.579099	0.0770966	0.57017	0.0764596	0.594736	0.076202	0.571016	0.0774109	0.582083	0.0770483	0.585766	0.0772607	0.588667	0.0769578	0.593547	0.0796499	0.610794	0.079637	0.608751	0.0788657
ConcAge	FALSE	0.609875	0.0769463	0.702494	0.0874232	0.915543	0.107807	0.578402	0.075153	0.570066	0.0755003	0.559806	0.0761395	0.566325	0.0761151	0.567125	0.0762511	0.582968	0.0753169	0.585376	0.0753934	0.567463	0.0753619	0.578839	0.0764616	0.585354	0.0764475	0.591587	0.0755832	0.575604	0.0768322	0.573473	0.0762599	0.59661	0.0760374	0.566897	0.077161	0.579417	0.0766769	0.583151	0.0768889	0.591306	0.0767388	0.589712	0.0792157	0.607904	0.0793465	0.611911	0.0786515
ConcSwap	FALSE	0.602916	0.0769518	0.721366	0.089313	0.953647	0.111249	0.58352	0.0749991	0.567951	0.0750164	0.557353	0.075735	0.564305	0.075753	0.565062	0.0759445	0.587513	0.075169	0.588774	0.0752803	0.572527	0.075201	0.577268	0.0761747	0.583773	0.0761453	0.595238	0.0754678	0.573445	0.0765617	0.578678	0.0761141	0.599559	0.0759465	0.564352	0.0769019	0.577775	0.0763179	0.581541	0.0765307	0.595461	0.0765998	0.587346	0.0787854	0.606121	0.0790557	0.61689	0.0785008
1st Symbol-row	1	0.602829	0.0769584	0.740446	0.0912061	0.99251	0.114702	0.590094	0.0749211	0.567248	0.0745753	0.556528	0.0753474	0.563627	0.0754092	0.564368	0.0756482	0.59335	0.0751058	0.593135	0.0752432	0.57903	0.0751233	0.576741	0.0759031	0.583243	0.0758612	0.599924	0.0754486	0.572717	0.0762969	0.585364	0.0760339	0.603343	0.0759366	0.563493	0.0766451	0.577227	0.0759868	0.581004	0.0762017	0.600796	0.076552	0.586552	0.0783779	0.605521	0.0787775	0.623285	0.078426
		0.606115	0.0771987	0.759739	0.0931024	1.03215	0.118166	0.597591	0.0749254	0.567987	0.0741961	0.557368	0.0749939	0.564321	0.0750988	0.565072	0.0753749	0.600005	0.0751324	0.598108	0.0752853	0.586445	0.0751351	0.577281	0.0756587	0.583788	0.0756078	0.605266	0.0755272	0.573451	0.0760495	0.592989	0.0760258	0.607657	0.0760085	0.564356	0.0764016	0.577798	0.0756982	0.581565	0.0759162	0.606879	0.0765993	0.587365	0.0780109	0.606132	0.078524	0.630578	0.0784329
		0.610024	0.0777259	0.779245	0.0950021	IsoLine	IsoLine	0.605403	0.0750116	0.570135	0.0738955	0.559835	0.0746897	0.566356	0.0748352	0.567143	0.0751367	0.60694	0.0752467	0.60329	0.075403	0.594173	0.0752354	0.578865	0.0754521	0.585384	0.0753959	0.610831	0.0756972	0.575616	0.0758301	0.600936	0.0760906	0.61215	0.0761564	0.566905	0.0761822	0.579463	0.0754646	0.583199	0.0756868	0.613216	0.0767379	0.58975	0.0777005	0.607925	0.0783062	0.638177	0.0785211
		0.623322	0.0793059	0.798967	0.096905			0.612898	0.0751727	0.573599	0.0736866	0.563823	0.0744482	0.569643	0.0746301	0.570492	0.0749439	0.613593	0.0754394	0.608259	0.0755869	0.601586	0.075416	0.581423	0.0752924	0.58796	0.075235	0.616167	0.0759448	0.579116	0.0756485	0.608559	0.0762229	0.616459	0.0763683	0.571027	0.0759964	0.58215	0.0752964	0.585835	0.0755235	0.619295	0.0769565	0.593602	0.0774603	0.610824	0.0781337	0.645468	0.0786834
		0.633208	0.0793419	0.818908	0.0988113			0.619468	0.0753957	0.578228	0.0735785	0.569157	0.07428	0.57404	0.0744924	0.574972	0.074805	0.619424	0.0756949	0.612615	0.075822	0.608085	0.0756625	0.584843	0.0751865	0.591405	0.0751321	0.620844	0.07625	0.583798	0.0755125	0.615243	0.076412	0.620235	0.076627	0.576544	0.0758523	0.58574	0.0752008	0.589356	0.0754334	0.624623	0.0772374	0.598753	0.0773008	0.614701	0.078014	0.65186	0.0789067
		0.634367	0.079436	0.839069	0.100721			0.624582	0.0756624	0.583818	0.073576	0.575603	0.0741924	0.579353	0.0744281	0.580386	0.074726	0.623962	0.0759925	0.616004	0.0760893	0.613143	0.0759547	0.588977	0.0751391	0.595568	0.0750915	0.624481	0.076588	0.589459	0.0754282	0.620445	0.0766427	0.623171	0.0769115	0.583212	0.0757563	0.590077	0.075182	0.593611	0.0754204	0.628768	0.0775579	0.604978	0.0772289	0.619387	0.0779523	0.656834	0.0791729
		0.630609	0.0794903	0.859455	0.102634			0.627824	0.0759514	0.590127	0.0736791	0.58288	0.0741893	0.58535	0.07444	0.586499	0.0747105	0.626838	0.0763081	0.618151	0.0763671	0.61635	0.076269	0.593643	0.0751522	0.600267	0.0751152	0.626785	0.0769316	0.595851	0.075399	0.623744	0.0768962	0.62503	0.0771989	0.590742	0.0757126	0.594971	0.0752408	0.598411	0.0754852	0.631395	0.0778921	0.612004	0.0772477	0.624677	0.0779513	0.659988	0.0794603
		0.620501	0.0795209	0.880066	0.10455			0.628933	0.0762392	0.596877	0.0738834	0.59067	0.0742707	0.591769	0.0745276	0.593043	0.074759	0.62782	0.0766161	0.618883	0.076633	0.617445	0.07658	0.598637	0.0752253	0.605296	0.0752021	0.627567	0.0772527	0.602693	0.0754265	0.624873	0.0771519	0.625662	0.0774659	0.598804	0.075723	0.600209	0.0753748	0.603549	0.0756248	0.632291	0.0782127	0.619526	0.0773565	0.63034	0.0780112	0.661066	0.0797458
		0.636988	0.0795355	0.900906	0.106469					0.603775	0.0741799	0.598633	0.0744331	0.598331	0.0746871	0.599732	0.0748695							0.603742	0.0753552	0.610436	0.0753483			0.609688	0.0755093					0.607046	0.0757872	0.605561	0.0755779	0.608799	0.0758333			0.627213	0.0775505	0.636128	0.0781291
		0.62043	0.0798949	0.921976	0.108392					0.610518	0.0745557	0.606419	0.0746694	0.604747	0.0749115	0.606274	0.0750371							0.608733	0.0755362	0.615462	0.0755476			0.616529	0.0756438					0.615107	0.0759022	0.610794	0.0758413	0.613931	0.0761014			0.63473	0.0778213	0.641789	0.0783001
		0.629573	0.0799232	0.943281	0.110319					0.616812	0.0749943	0.61369	0.0749693	0.610738	0.075191	0.612383	0.0752545							0.613394	0.0757604	0.620154	0.0757911			0.622918	0.0758242					0.622635	0.0760631	0.615679	0.0761536	0.618722	0.0764174			0.641748	0.0781569	0.647075	0.0785167
		0.642017	0.0800586	0.964821	0.112248					0.622382	0.0754765	0.620128	0.0753197	0.616041	0.0755134	0.617792	0.0755122							0.617519	0.0760179	0.624308	0.0760682			0.628575	0.0760425					0.629302	0.0762628	0.620002	0.0765011	0.622962	0.0767676			0.647961	0.0785427	0.651754	0.0787692
		0.63489	0.0803595	0.9866	0.114181					0.626984	0.0759814	0.62545	0.0757053	0.620426	0.0758645	0.622265	0.0757989							0.62093	0.0762976	0.627741	0.0763669			0.633254	0.0762893					0.634815	0.0764927	0.623575	0.0768685	0.626465	0.0771367			0.653098	0.0789619	0.655623	0.0790469
		0.638562	0.0808463	1.00862	0.116117					0.630417	0.0764868	0.629425	0.0761092	0.623699	0.0762291	0.625605	0.0761022							0.623477	0.0765873	0.630304	0.0766741			0.636748	0.0765537					0.638934	0.0767426	0.62624	0.0772399	0.629079	0.0775084			0.656933	0.0793961	0.658513	0.0793374
		0.661502	0.0830425	1.03089	0.118057					0.632532	0.0769707	0.631878	0.0765137	0.625719	0.0765913	0.627668	0.0764087							0.625048	0.0768742	0.631885	0.0769763			0.638907	0.0768242					0.641479	0.0770017	0.627883	0.077599	0.63069	0.0778666			0.659299	0.0798264	0.660296	0.0796281
		0.718674	0.0885996	1.0534	0.12					0.633235	0.0774118	0.632703	0.0769013	0.626397	0.0769351	0.628362	0.0767051							0.625575	0.0771457	0.632415	0.0772603			0.639635	0.077089					0.642339	0.0772586	0.628431	0.07793	0.631226	0.0781957			0.660093	0.0802339	0.660896	0.0799063
		0.724578	0.0891927	1.0534	0.12
		0.794395	0.0967925	IsoLine	IsoLine
		0.809334	0.097871
		0.874178	0.103934
		0.951074	0.11029
		0.938053	0.110351
		IsoLine	IsoLine
[truncated: 32 more columns]

## Sheet: PlotDat4
Source sheet	Data	0.601486	0.0759364	0	0	0.217708	0.0315113	0.628933	0.0762392	0.633235	0.0774118	0.632703	0.0769013	0.626397	0.0769351	0.628362	0.0767051	0.62782	0.0766161	0.618883	0.076633	0.617445	0.07658	0.625575	0.0771457	0.632415	0.0772603	0.627567	0.0772527	0.639635	0.077089	0.624873	0.0771519	0.625662	0.0774659	0.642339	0.0772586	0.628431	0.07793	0.631226	0.0781957	0.632291	0.0782127	0.660093	0.0802339	0.660896	0.0799063	0.661066	0.0797458
Plot name	Concordia0	0.600242	0.0759936	0.0826367	0.0125848	0.482812	0.0640155	0.627818	0.0765024	0.631875	0.0779101	0.63115	0.0773719	0.625115	0.0773474	0.62706	0.0770696	0.626828	0.0768915	0.61814	0.0768654	0.616342	0.0768624	0.624577	0.0774702	0.631409	0.0775962	0.626766	0.0775255	0.638276	0.07742	0.62374	0.0773893	0.625014	0.0776907	0.640739	0.0775851	0.627378	0.0783105	0.630193	0.0785716	0.631382	0.0784939	0.65859	0.0807211	0.659767	0.0802437	0.659982	0.0800062
Plot Type	1	0.594615	0.0761244	0.172102	0.0253281	0.805631	0.097544	0.62457	0.0767198	0.627952	0.0782532	0.626637	0.0777415	0.621394	0.0776646	0.623271	0.0773618	0.623943	0.0771121	0.615982	0.0770455	0.613128	0.0770934	0.621682	0.0777181	0.628492	0.0778482	0.624446	0.0777278	0.634316	0.0776921	0.620438	0.077589	0.62314	0.0778552	0.636075	0.0778604	0.624336	0.0785815	0.627208	0.0788363	0.628743	0.0787129	0.65423	0.0810936	0.656486	0.0805081	0.656822	0.0802204
1st free col	87	0.595012	0.0761721	0.268961	0.0382317	1.19873	0.132129	0.619452	0.0768737	0.621784	0.0784132	0.61953	0.0779801	0.615536	0.0778608	0.617302	0.077558	0.619398	0.07726	0.612585	0.0771586	0.608065	0.0772543	0.617124	0.0778692	0.623902	0.0779958	0.620795	0.0778432	0.628076	0.0778832	0.615232	0.0777348	0.620191	0.0779461	0.628725	0.0780621	0.619552	0.0787209	0.622515	0.0789684	0.624588	0.078852	0.647366	0.0813213	0.65132	0.080678	0.651843	0.0803711
Sigma Level	2	0.596365	0.0761766	0.373824	0.0512976	1.67741	0.167804	0.612878	0.0769516	0.61387	0.0783772	0.610404	0.0780683	0.608015	0.0779203	0.609637	0.0776423	0.613562	0.0773232	0.608223	0.0771957	0.601562	0.077332	0.611272	0.0779114	0.618009	0.0780272	0.616109	0.0778625	0.620062	0.077978	0.608546	0.077815	0.616407	0.077956	0.619284	0.0781738	0.613413	0.0787176	0.616494	0.078957	0.619253	0.0788998	0.638555	0.0813857	0.644686	0.0807396	0.645448	0.080446
Absolute Errs	FALSE	0.603456	0.0762145	0.487352	0.064528	2.2603	0.204603	0.605382	0.0769474	0.604853	0.078148	0.6	0.077999	0.599441	0.0778381	0.600896	0.0776078	0.606906	0.0772966	0.60325	0.0771536	0.594146	0.0773203	0.604602	0.0778412	0.611292	0.0779399	0.610767	0.0777839	0.610923	0.0779686	0.600921	0.0778231	0.612093	0.0778841	0.608517	0.0781865	0.606416	0.0785718	0.609631	0.0788032	0.61317	0.0788525	0.628509	0.0812816	0.637123	0.080688	0.638155	0.080439
Symbol Type	1	0.600679	0.0762194	0.610262	0.077925	2.97009	0.242562	0.597569	0.0768612	0.595462	0.0777444	0.589159	0.0777779	0.590508	0.0776209	0.591789	0.0774574	0.599971	0.0771823	0.598069	0.0770359	0.586418	0.07722	0.597652	0.0776644	0.604294	0.0777407	0.605202	0.0776139	0.6014	0.0778559	0.592975	0.0777583	0.6076	0.0777363	0.597296	0.0780992	0.599129	0.0782952	0.602484	0.0785195	0.606832	0.0787139	0.618043	0.0810174	0.629242	0.0805274	0.630556	0.0803508
Inverse Plot	FALSE	0.590296	0.0762277	0.743328	0.0914905	3.83441	0.281716	0.590075	0.0767001	0.586458	0.0771988	0.57876	0.0774228	0.581939	0.0772864	0.583052	0.0772032	0.593319	0.0769896	0.593099	0.076852	0.579005	0.0770393	0.590986	0.0773952	0.597582	0.077446	0.599865	0.0773663	0.592263	0.0776489	0.585351	0.077626	0.603291	0.0775244	0.58653	0.0779189	0.592142	0.0779104	0.59563	0.0781287	0.600753	0.0784953	0.608005	0.0806146	0.621683	0.0802707	0.623265	0.0801885
Color Plot	FALSE	0.601158	0.0765244	0.887391	0.105227	4.8869	0.322105	0.583504	0.0764771	0.578571	0.0765557	0.569646	0.0769625	0.57443	0.0768616	0.575394	0.0768659	0.587488	0.0767341	0.588743	0.0766169	0.572506	0.0767929	0.585144	0.0770555	0.591701	0.0770796	0.595189	0.0770611	0.584254	0.0773645	0.578668	0.0774368	0.599515	0.0772657	0.577092	0.0776603	0.58602	0.0774484	0.589627	0.0776626	0.595426	0.0782143	0.599207	0.0801058	0.615057	0.0799388	0.616873	0.0799652
3D plot	FALSE	0.607829	0.0765608	1.04336	0.119136	6.16853	0.363766	0.578391	0.0762103	0.57244	0.075867	0.562554	0.0764343	0.568588	0.076381	0.569435	0.0764727	0.58295	0.0764365	0.585354	0.0763496	0.567448	0.0765007	0.5806	0.0766727	0.587126	0.0766712	0.591552	0.076723	0.578021	0.0770258	0.573466	0.0772062	0.596579	0.0769811	0.569746	0.0773443	0.581261	0.0769467	0.584959	0.0771588	0.59128	0.0778938	0.592364	0.0795322	0.609902	0.0795585	0.611899	0.0796991
Linear	FALSE	0.608016	0.0766555	1.21222	0.13322	7.72917	0.40674	0.575148	0.0759213	0.568561	0.0751885	0.55806	0.075881	0.564887	0.0758834	0.565658	0.0760555	0.580073	0.0761209	0.583207	0.0760717	0.564242	0.0761864	0.577721	0.0762779	0.584229	0.0762538	0.589248	0.0763795	0.574068	0.07666	0.570166	0.0769527	0.59472	0.0766937	0.565087	0.0769965	0.578248	0.076446	0.582005	0.0766584	0.588654	0.0775597	0.588028	0.0789402	0.606635	0.0791607	0.608745	0.0794116
Data Range	H7:L45	0.606176	0.076693	1.39503	0.147481	IsoLine	IsoLine	0.574039	0.0756336	0.567248	0.0745753	0.556528	0.0753474	0.563627	0.0754092	0.564368	0.0756482	0.579091	0.0758129	0.582476	0.0758058	0.563146	0.0758754	0.576741	0.0759031	0.583243	0.0758612	0.588466	0.0760583	0.572717	0.0762969	0.569038	0.0766969	0.594089	0.0764268	0.563493	0.0766451	0.577227	0.0759868	0.581004	0.0762017	0.587758	0.077239	0.586552	0.0783779	0.605521	0.0787775	0.607667	0.0791261
Filled Symbols	FALSE	0.596955	0.0769244	1.59294	0.161922			0.575154	0.0753704	0.568608	0.074077	0.558081	0.0748768	0.564909	0.0749969	0.56567	0.0752836	0.580083	0.0755375	0.583219	0.0755735	0.564249	0.0755929	0.577739	0.0755787	0.584249	0.0755254	0.589267	0.0757855	0.574076	0.0759659	0.57017	0.0764596	0.594736	0.076202	0.565092	0.0763185	0.57828	0.0756063	0.582038	0.0758257	0.588667	0.0769578	0.588055	0.0778907	0.60665	0.0784401	0.608751	0.0788657
ConcAge	FALSE	0.609875	0.0769463	1.80721	0.176545			0.578402	0.075153	0.572532	0.0737339	0.562594	0.0745072	0.56863	0.0746797	0.56946	0.0749914	0.582968	0.0753169	0.585376	0.0753934	0.567463	0.0753619	0.580634	0.0753308	0.587166	0.0752734	0.591587	0.0755832	0.578036	0.0756938	0.573473	0.0762599	0.59661	0.0760374	0.569756	0.0760432	0.581322	0.0753353	0.585022	0.075561	0.591306	0.0767388	0.592415	0.0775182	0.60993	0.0781758	0.611911	0.0786515
ConcSwap	FALSE	0.602916	0.0769518	2.03919	0.191351			0.58352	0.0749991	0.5787	0.0735739	0.569701	0.0742687	0.574488	0.0744834	0.575428	0.0747953	0.587513	0.075169	0.588774	0.0752803	0.572527	0.075201	0.585192	0.0751797	0.591757	0.0751258	0.595238	0.0754678	0.584276	0.0755027	0.578678	0.0761141	0.599559	0.0759465	0.577106	0.0758415	0.586106	0.0751959	0.589715	0.075429	0.595461	0.0765998	0.599278	0.0772905	0.615097	0.0780059	0.61689	0.0785008
1st Symbol-row	1	0.602829	0.0769584	2.29034	0.206344			0.590094	0.0749211	0.586613	0.0736099	0.578826	0.0741804	0.582009	0.074424	0.583094	0.074711	0.59335	0.0751058	0.593135	0.0752432	0.57903	0.0751233	0.591043	0.0751375	0.597649	0.0750943	0.599924	0.0754486	0.59229	0.0754079	0.585364	0.0760339	0.603343	0.0759366	0.586547	0.0757298	0.592245	0.0751992	0.595737	0.0754403	0.600796	0.076552	0.60809	0.0772261	0.62173	0.0779442	0.623285	0.078426
		0.606115	0.0771987	2.56225	0.221526			0.597591	0.0749254	0.59563	0.0738391	0.589231	0.0742497	0.590583	0.0745062	0.591834	0.0747455	0.600005	0.0751324	0.598108	0.0752853	0.586445	0.0751351	0.597714	0.0752077	0.604367	0.0751817	0.605266	0.0755272	0.601429	0.0754173	0.592989	0.0760258	0.607657	0.0760085	0.597315	0.0757171	0.599241	0.075345	0.6026	0.0755941	0.606879	0.0765993	0.618136	0.0773302	0.629294	0.0779958	0.630578	0.0784329
		0.610024	0.0777259	2.85662	0.236899			0.605403	0.0750116	0.605021	0.0742428	0.600072	0.0744708	0.599516	0.0747233	0.600941	0.0748959	0.60694	0.0752467	0.60329	0.075403	0.594173	0.0752354	0.604664	0.0753845	0.611364	0.0753808	0.610831	0.0756972	0.610952	0.07553	0.600936	0.0760906	0.61215	0.0761564	0.608536	0.0758044	0.606528	0.0756216	0.609747	0.0758779	0.613216	0.0767379	0.628602	0.0775944	0.637175	0.0781565	0.638177	0.0785211
		0.623322	0.0793059	3.17532	0.252465			0.612898	0.0751727	0.614025	0.0747883	0.61047	0.0748259	0.608085	0.0750579	0.609678	0.07515	0.613593	0.0754394	0.608259	0.0755869	0.601586	0.075416	0.61133	0.0756537	0.618076	0.0756755	0.616167	0.0759448	0.620089	0.075737	0.608559	0.0762229	0.616459	0.0763683	0.619301	0.0759847	0.613516	0.0760065	0.6166	0.0762687	0.619295	0.0769565	0.63864	0.0779971	0.644734	0.0784132	0.645468	0.0786834
		0.633208	0.0793419	3.52035	0.268227			0.619468	0.0753957	0.621912	0.0754314	0.619585	0.0752862	0.615594	0.0754827	0.617336	0.0754874	0.619424	0.0756949	0.612615	0.075822	0.608085	0.0756625	0.617171	0.0759934	0.623957	0.076042	0.620844	0.07625	0.628098	0.0760214	0.615243	0.076412	0.620235	0.076627	0.628739	0.0762433	0.619637	0.0764684	0.622604	0.0767348	0.624623	0.0772374	0.647437	0.078506	0.651359	0.0787451	0.65186	0.0789067
		0.634367	0.079436	3.8939	0.284187			0.624582	0.0756624	0.628043	0.0761201	0.626676	0.0758144	0.621436	0.0759633	0.623295	0.0758806	0.623962	0.0759925	0.616004	0.0760893	0.613143	0.0759547	0.621716	0.0763762	0.628532	0.0764504	0.624481	0.076588	0.634332	0.0763601	0.620445	0.0766427	0.623171	0.0769115	0.636086	0.0765593	0.624397	0.0769701	0.627272	0.0772385	0.628768	0.0775579	0.654281	0.0790796	0.656515	0.0791253	0.656834	0.0791729
		0.630609	0.0794903	4.29831	0.300349			0.627824	0.0759514	0.631922	0.0767986	0.63117	0.0763677	0.625137	0.0764609	0.627073	0.0762977	0.626838	0.0763081	0.618151	0.0763671	0.61635	0.076269	0.624595	0.0767709	0.631429	0.0768678	0.626785	0.0769316	0.638284	0.0767259	0.623744	0.0768962	0.62503	0.0771989	0.640744	0.0769071	0.62741	0.0774708	0.630226	0.077739	0.631395	0.0778921	0.658617	0.0796716	0.659782	0.0795232	0.659988	0.0794603
		0.620501	0.0795209	4.73615	0.316713			0.628933	0.0762392	0.633235	0.0774118	0.632703	0.0769013	0.626397	0.0769351	0.628362	0.0767051	0.62782	0.0766161	0.618883	0.076633	0.617445	0.07658	0.625575	0.0771457	0.632415	0.0772603	0.627567	0.0772527	0.639635	0.077089	0.624873	0.0771519	0.625662	0.0774659	0.642339	0.0772586	0.628431	0.07793	0.631226	0.0781957	0.632291	0.0782127	0.660093	0.0802339	0.660896	0.0799063	0.661066	0.0797458
		0.636988	0.0795355	5.21016	0.333284			Black	Black	Black	Black	Black	Black	Black	Black	Black	Black	Black	Black	Black	Black	Black	Black	Black	Black	Black	Black	Black	Black	Black	Black	Black	Black	Black	Black	Black	Black	Black	Black	Black	Black	Black	Black	Black	Black	Black	Black	Black	Black
		0.62043	0.0798949	5.72335	0.350063
		0.629573	0.0799232	6.27895	0.367054
		0.642017	0.0800586	6.88046	0.384258
		0.63489	0.0803595	7.53167	0.401678
		0.638562	0.0808463	8.2367	0.419318
		0.661502	0.0830425	8.99999	0.43718
		0.718674	0.0885996	9	0.43718
		0.724578	0.0891927	IsoLine	IsoLine
		0.794395	0.0967925
		0.809334	0.097871
		0.874178	0.103934
		0.951074	0.11029
		0.938053	0.110351
		5.98114	0.346785
		7.15218	0.403966
		IsoLine	IsoLine
[truncated: 36 more columns]

## Sheet: PlotDat3
Source sheet	Data	0.601486	0.0759364	0.55	0.0714672	0.542391	0.0706383	0.628933	0.0762392	0.633235	0.0774118	0.632703	0.0769013	0.626397	0.0769351	0.628362	0.0767051	0.62782	0.0766161	0.618883	0.076633	0.617445	0.07658	0.625575	0.0771457	0.632415	0.0772603	0.627567	0.0772527	0.639635	0.077089	0.624873	0.0771519	0.625662	0.0774659	0.642339	0.0772586	0.628431	0.07793	0.631226	0.0781957	0.632291	0.0782127	0.660093	0.0802339	0.660896	0.0799063	0.661066	0.0797458
Plot name	Concordia1	0.600242	0.0759936	0.557657	0.0723004	0.573073	0.0739651	0.628331	0.0764359	0.632496	0.077791	0.631863	0.0772548	0.625703	0.0772455	0.627658	0.0769783	0.627284	0.0768226	0.61814	0.0768654	0.616849	0.0767912	0.625035	0.0773902	0.63187	0.0775138	0.627133	0.0774588	0.638901	0.0773364	0.62374	0.0773893	0.625014	0.0776907	0.641475	0.077502	0.62786	0.0782186	0.630666	0.0784811	0.631799	0.0784242	0.659279	0.0806009	0.660285	0.0801598	0.660481	0.0799405
Plot Type	1	0.594615	0.0761244	0.570938	0.0737353	0.604365	0.0773023	0.626556	0.0766107	0.630348	0.0780916	0.629395	0.077559	0.623668	0.0775091	0.625587	0.0772166	0.625707	0.0770025	0.615982	0.0770455	0.615093	0.0769779	0.623451	0.0775968	0.630274	0.0777256	0.625864	0.0776298	0.636737	0.0775558	0.620438	0.077589	0.62314	0.0778552	0.638927	0.0777215	0.626194	0.0784522	0.629032	0.0787105	0.630356	0.0786051	0.656895	0.0809113	0.658491	0.0803776	0.658754	0.0801131
1st free col	143	0.595012	0.0761721	0.584332	0.0751722	0.636279	0.0806498	0.623685	0.0767561	0.626884	0.0783005	0.625407	0.0778005	0.620381	0.0777142	0.622238	0.0774094	0.623157	0.077148	0.612585	0.0771586	0.612252	0.0771317	0.620893	0.0777565	0.627698	0.0778865	0.623815	0.0777583	0.633237	0.0777374	0.615232	0.0777348	0.620191	0.0779461	0.634804	0.0779073	0.623508	0.0786204	0.626396	0.0788738	0.628024	0.0787476	0.653043	0.0811515	0.655593	0.0805502	0.655961	0.0802561
Sigma Level	2	0.596365	0.0761766	0.59784	0.076611	0.668829	0.0840077	0.619844	0.0768657	0.622255	0.0784086	0.620074	0.0779687	0.615984	0.0778519	0.617759	0.0775483	0.619746	0.0772527	0.608223	0.0771957	0.608452	0.0772461	0.617472	0.0778624	0.624253	0.0779895	0.621075	0.0778385	0.628554	0.0778734	0.608546	0.077815	0.616407	0.077956	0.629288	0.0780513	0.619918	0.078716	0.622874	0.078964	0.624906	0.0788454	0.647892	0.081311	0.651715	0.0806699	0.652224	0.0803633
Absolute Errs	FALSE	0.603456	0.0762145	0.611464	0.0780517	0.702025	0.087376	0.6152	0.0769346	0.616665	0.0784111	0.613627	0.0780563	0.610671	0.0779162	0.612344	0.0776272	0.615623	0.077312	0.60325	0.0771536	0.603859	0.0773159	0.613339	0.0779098	0.62009	0.07803	0.617764	0.077867	0.622893	0.0779577	0.600921	0.0778231	0.612093	0.0778841	0.622619	0.0781473	0.615581	0.0787348	0.61862	0.0789769	0.621137	0.0788944	0.641667	0.0813829	0.647029	0.0807316	0.647707	0.0804299
Symbol Type	1	0.600679	0.0762194	0.625203	0.0794943	0.735883	0.0907549	0.609958	0.0769599	0.610356	0.078308	0.60635	0.0780595	0.604674	0.0779043	0.606231	0.0776428	0.610969	0.0773234	0.598069	0.0770359	0.598672	0.0773382	0.608673	0.0778967	0.615392	0.0780064	0.614027	0.0778426	0.616502	0.0779869	0.592975	0.0777583	0.6076	0.0777363	0.615089	0.078191	0.610687	0.078676	0.613819	0.0789122	0.616883	0.0788922	0.63464	0.0813641	0.641739	0.0807325	0.642607	0.0804531
Inverse Plot	FALSE	0.590296	0.0762277	0.63906	0.0809388	0.770413	0.0941442	0.604344	0.0769405	0.603606	0.0781037	0.59856	0.0779781	0.598255	0.0778167	0.599687	0.0775943	0.605986	0.0772863	0.593099	0.076852	0.59312	0.0773119	0.603679	0.0778236	0.610362	0.0779195	0.610028	0.0777663	0.609659	0.0779594	0.585351	0.077626	0.603291	0.0775244	0.607027	0.0781806	0.605449	0.078542	0.608682	0.0787725	0.612329	0.0788391	0.627119	0.0812553	0.636077	0.0806727	0.637146	0.0804319
Color Plot	FALSE	0.601158	0.0765244	0.653035	0.0823853	0.805631	0.097544	0.598606	0.0768772	0.596708	0.0778072	0.590598	0.0778156	0.591693	0.0776572	0.592998	0.0774838	0.600892	0.0772023	0.588743	0.0766169	0.587444	0.0772383	0.598574	0.0776937	0.605223	0.0777733	0.605941	0.0776414	0.602664	0.0778766	0.578668	0.0774368	0.599515	0.0772657	0.598786	0.0781164	0.600096	0.0783389	0.603432	0.0785641	0.607674	0.0787373	0.619432	0.0810613	0.630288	0.0805547	0.631564	0.0803671
3D plot	FALSE	0.607829	0.0765608	0.667129	0.0838338	0.841549	0.100954	0.592994	0.0767728	0.589965	0.0774315	0.582811	0.0775793	0.585277	0.0774328	0.586456	0.0773162	0.595911	0.0770752	0.585354	0.0763496	0.581893	0.0771204	0.593583	0.0775127	0.600197	0.077574	0.601944	0.0774735	0.595823	0.0777421	0.573466	0.0772062	0.596579	0.0769811	0.590724	0.0780014	0.594864	0.0780755	0.5983	0.078296	0.603122	0.0785913	0.611915	0.0807905	0.624628	0.0803837	0.626105	0.0802616
Linear	FALSE	0.608016	0.0766555	0.681344	0.0852841	0.878181	0.104375	0.587753	0.0766318	0.583671	0.0769928	0.57554	0.0772794	0.579286	0.0771533	0.580347	0.0770988	0.591259	0.0769104	0.583207	0.0760717	0.576709	0.0769636	0.588922	0.0772885	0.595504	0.0773305	0.598213	0.0772698	0.589434	0.0775617	0.570166	0.0769527	0.59472	0.0766937	0.583196	0.0778405	0.589979	0.0777632	0.593509	0.0779799	0.598871	0.0784075	0.604896	0.0804549	0.619342	0.0801672	0.621007	0.0801201
Data Range	H7:L45	0.606176	0.076693	0.695679	0.0867364	0.915543	0.107807	0.583113	0.0764605	0.578102	0.0765106	0.569103	0.076929	0.573983	0.0768309	0.574938	0.0768411	0.58714	0.0767153	0.582476	0.0758058	0.572119	0.0767746	0.584796	0.077031	0.591351	0.0770533	0.59491	0.0770393	0.583777	0.0773434	0.569038	0.0766969	0.594089	0.0764268	0.57653	0.0776408	0.585656	0.0774157	0.589269	0.0776297	0.595108	0.0781939	0.598683	0.0800691	0.614663	0.0799146	0.616492	0.0799486
Filled Symbols	FALSE	0.596955	0.0769244	0.710137	0.0881907	0.953647	0.111249	0.579275	0.0762662	0.573499	0.0760057	0.56378	0.0765434	0.569598	0.0764797	0.570465	0.0765543	0.583735	0.0764983	0.583219	0.0755735	0.568323	0.0765617	0.581386	0.0767512	0.587917	0.0767547	0.59218	0.0767919	0.579099	0.0770966	0.57017	0.0764596	0.594736	0.076202	0.571016	0.0774109	0.582083	0.0770483	0.585766	0.0772607	0.591997	0.0779599	0.593547	0.0796499	0.610794	0.079637	0.612759	0.0797547
ConcAge	FALSE	0.609875	0.0769463	0.724718	0.0896469	0.99251	0.114702	0.576408	0.0760575	0.570066	0.0755003	0.559806	0.0761395	0.566325	0.0761151	0.567125	0.0762511	0.581191	0.0762688	0.585376	0.0753934	0.565487	0.0763342	0.578839	0.0764616	0.585354	0.0764475	0.590143	0.0765387	0.575604	0.0768322	0.573473	0.0762599	0.59661	0.0760374	0.566897	0.077161	0.579417	0.0766769	0.583151	0.0768889	0.589674	0.0777156	0.589712	0.0792157	0.607904	0.0793465	0.60997	0.0795469
ConcSwap	FALSE	0.602916	0.0769518	0.739423	0.091105	IsoLine	IsoLine	0.574637	0.0758435	0.567951	0.0750164	0.557353	0.075735	0.564305	0.075753	0.565062	0.0759445	0.57962	0.076037	0.588774	0.0752803	0.563736	0.0761021	0.577268	0.0761747	0.583773	0.0761453	0.588886	0.0762905	0.573445	0.0765617	0.578678	0.0761141	0.599559	0.0759465	0.564352	0.0769019	0.577775	0.0763179	0.581541	0.0765307	0.58824	0.0774718	0.587346	0.0787854	0.606121	0.0790557	0.608248	0.0793343
1st Symbol-row	1	0.602829	0.0769584	0.754254	0.0925651			0.574039	0.0756336	0.567248	0.0745753	0.556528	0.0753474	0.563627	0.0754092	0.564368	0.0756482	0.579091	0.0758129	0.593135	0.0752432	0.563146	0.0758754	0.576741	0.0759031	0.583243	0.0758612	0.588466	0.0760583	0.572717	0.0762969	0.585364	0.0760339	0.603343	0.0759366	0.563493	0.0766451	0.577227	0.0759868	0.581004	0.0762017	0.587758	0.077239	0.586552	0.0783779	0.605521	0.0787775	0.607667	0.0791261
		0.606115	0.0771987	0.769211	0.0940271			0.574641	0.0754369	0.567987	0.0741961	0.557368	0.0749939	0.564321	0.0750988	0.565072	0.0753749	0.579627	0.0756064	0.598108	0.0752853	0.563742	0.0756641	0.577281	0.0756587	0.583788	0.0756078	0.588899	0.0758522	0.573451	0.0760495	0.592989	0.0760258	0.607657	0.0760085	0.564356	0.0764016	0.577798	0.0756982	0.581565	0.0759162	0.58825	0.0770276	0.587365	0.0780109	0.606132	0.078524	0.608252	0.0789314
		0.610024	0.0777259	0.784296	0.0954912			0.576417	0.075262	0.570135	0.0738955	0.559835	0.0746897	0.566356	0.0748352	0.567143	0.0751367	0.581205	0.0754265	0.60329	0.075403	0.565499	0.0754775	0.578865	0.0754521	0.585384	0.0753959	0.590169	0.0756812	0.575616	0.0758301	0.600936	0.0760906	0.61215	0.0761564	0.566905	0.0761822	0.579463	0.0754646	0.583199	0.0756868	0.589693	0.0768467	0.58975	0.0777005	0.607925	0.0783062	0.60998	0.0787588
		0.623322	0.0793059	0.799509	0.0969571			0.579287	0.0751167	0.573599	0.0736866	0.563823	0.0744482	0.569643	0.0746301	0.570492	0.0749439	0.583755	0.075281	0.608259	0.0755869	0.568339	0.0753236	0.581423	0.0752924	0.58796	0.075235	0.592218	0.0755528	0.579116	0.0756485	0.608559	0.0762229	0.616459	0.0763683	0.571027	0.0759964	0.58215	0.0752964	0.585835	0.0755235	0.592024	0.0767042	0.593602	0.0774603	0.610824	0.0781337	0.612773	0.0786158
		0.633208	0.0793419	0.814852	0.098425			0.583129	0.0750071	0.578228	0.0735785	0.569157	0.07428	0.57404	0.0744924	0.574972	0.074805	0.587165	0.0751763	0.612615	0.075822	0.572139	0.0752093	0.584843	0.0751865	0.591405	0.0751321	0.594958	0.0754726	0.583798	0.0755125	0.615243	0.076412	0.620235	0.076627	0.576544	0.0758523	0.58574	0.0752008	0.589356	0.0754334	0.595143	0.0766063	0.598753	0.0773008	0.614701	0.078014	0.616509	0.0785086
		0.634367	0.079436	0.830326	0.0998949			0.587772	0.0749381	0.583818	0.073576	0.575603	0.0741924	0.579353	0.0744281	0.580386	0.074726	0.591288	0.075117	0.616004	0.0760893	0.576733	0.0751395	0.588977	0.0751391	0.595568	0.0750915	0.598269	0.075444	0.589459	0.0754282	0.620445	0.0766427	0.623171	0.0769115	0.583212	0.0757563	0.590077	0.075182	0.593611	0.0754204	0.598912	0.0765574	0.604978	0.0772289	0.619387	0.0779523	0.621026	0.078442
		0.630609	0.0794903	0.845932	0.101367			0.593015	0.0749128	0.590127	0.0736791	0.58288	0.0741893	0.58535	0.07444	0.586499	0.0747105	0.595943	0.0751056	0.618151	0.0763671	0.581919	0.0751172	0.593643	0.0751522	0.600267	0.0751152	0.602006	0.0754685	0.595851	0.075399	0.623744	0.0768962	0.62503	0.0771989	0.590742	0.0757126	0.594971	0.0752408	0.598411	0.0754852	0.603166	0.0765595	0.612004	0.0772477	0.624677	0.0779513	0.626127	0.0784188
		0.620501	0.0795209	0.861671	0.102841			0.598628	0.0749322	0.596877	0.0738834	0.59067	0.0742707	0.591769	0.0745276	0.593043	0.074759	0.600926	0.0751427	0.618883	0.076633	0.587471	0.0751435	0.598637	0.0752253	0.605296	0.0752021	0.606005	0.0755448	0.602693	0.0754265	0.624873	0.0771519	0.625662	0.0774659	0.598804	0.075723	0.600209	0.0753748	0.603549	0.0756248	0.60772	0.0766127	0.619526	0.0773565	0.63034	0.0780112	0.631587	0.07844
		0.636988	0.0795355	0.877544	0.104316			0.604366	0.0749955	0.603775	0.0741799	0.598633	0.0744331	0.598331	0.0746871	0.599732	0.0748695	0.60602	0.0752267	Black	Black	0.593147	0.0752171	0.603742	0.0753552	0.610436	0.0753483	0.610092	0.0756696	0.609688	0.0755093	Black	Black	Black	Black	0.607046	0.0757872	0.605561	0.0755779	0.608799	0.0758333	0.612375	0.0767145	0.627213	0.0775505	0.636128	0.0781291	0.637169	0.0785048
		0.62043	0.0798949	0.893552	0.105794			0.609978	0.0751	0.610518	0.0745557	0.606419	0.0746694	0.604747	0.0749115	0.606274	0.0750371	0.611001	0.0753538			0.598698	0.0753349	0.608733	0.0755362	0.615462	0.0755476	0.614089	0.0758376	0.616529	0.0756438					0.615107	0.0759022	0.610794	0.0758413	0.613931	0.0761014	0.616927	0.0768604	0.63473	0.0778213	0.641789	0.0783001	0.642628	0.0786103
		0.629573	0.0799232	0.909697	0.107274			0.615219	0.0752409	0.616812	0.0749943	0.61369	0.0749693	0.610738	0.075191	0.612383	0.0752545	0.615653	0.0755185			0.603882	0.0754918	0.613394	0.0757604	0.620154	0.0757911	0.61782	0.0760413	0.622918	0.0758242					0.622635	0.0760631	0.615679	0.0761536	0.618722	0.0764174	0.621178	0.0770442	0.641748	0.0781569	0.647075	0.0785167	0.647726	0.0787519
		0.642017	0.0800586	0.925979	0.108756			0.61986	0.0754123	0.622382	0.0754765	0.620128	0.0753197	0.616041	0.0755134	0.617792	0.0755122	0.619771	0.0757137			0.608473	0.0756808	0.617519	0.0760179	0.624308	0.0760682	0.621123	0.0762718	0.628575	0.0760425					0.629302	0.0762628	0.620002	0.0765011	0.622962	0.0767676	0.624941	0.0772578	0.647961	0.0785427	0.651754	0.0787692	0.652241	0.0789233
		0.63489	0.0803595	0.942401	0.110239			0.623698	0.0756066	0.626984	0.0759814	0.62545	0.0757053	0.620426	0.0758645	0.622265	0.0757989	0.623177	0.0759307			0.612268	0.0758937	0.62093	0.0762976	0.627741	0.0763669	0.623852	0.0765191	0.633254	0.0762893					0.634815	0.0764927	0.623575	0.0768685	0.626465	0.0771367	0.628052	0.0774919	0.653098	0.0789619	0.655623	0.0790469	0.655974	0.0791172
		0.638562	0.0808463	0.958962	0.111725			0.626565	0.0758153	0.630417	0.0764868	0.629425	0.0761092	0.623699	0.0762291	0.625605	0.0761022	0.625721	0.0761602			0.615104	0.0761212	0.623477	0.0765873	0.630304	0.0766741	0.62589	0.0767724	0.636748	0.0765537					0.638934	0.0767426	0.62624	0.0772399	0.629079	0.0775084	0.630375	0.0777362	0.656933	0.0793961	0.658513	0.0793374	0.658763	0.079325
		0.661502	0.0830425	0.975665	0.113213			0.628336	0.0760292	0.632532	0.0769707	0.631878	0.0765137	0.625719	0.0765913	0.627668	0.0764087	0.627291	0.076392			0.616855	0.0763533	0.625048	0.0768742	0.631885	0.0769763	0.627147	0.0770205	0.638907	0.0768242					0.641479	0.0770017	0.627883	0.077599	0.63069	0.0778666	0.631809	0.07798	0.659299	0.0798264	0.660296	0.0796281	0.660485	0.0795376
		0.718674	0.0885996	0.99251	0.114702			0.628933	0.0762392	0.633235	0.0774118	0.632703	0.0769013	0.626397	0.0769351	0.628362	0.0767051	0.62782	0.0766161			0.617445	0.07658	0.625575	0.0771457	0.632415	0.0772603	0.627567	0.0772527	0.639635	0.077089					0.642339	0.0772586	0.628431	0.07793	0.631226	0.0781957	0.632291	0.0782127	0.660093	0.0802339	0.660896	0.0799063	0.661066	0.0797458
		0.724578	0.0891927	0.995899	0.115			Black	Black	Black	Black	Black	Black	Black	Black	Black	Black	Black	Black			Black	Black	Black	Black	Black	Black	Black	Black	Black	Black					Black	Black	Black	Black	Black	Black	Black	Black	Black	Black	Black	Black	Black	Black
		0.794395	0.0967925	IsoLine	IsoLine
		0.809334	0.097871
		0.874178	0.103934
		0.951074	0.11029
		0.938053	0.110351
		5.98114	0.346785
		7.15218	0.403966
		IsoLine	IsoLine
[truncated: 92 more columns]

## Sheet: PlotDat7
Source sheet	Data	0.596955	0.0769244	0.582043	0.0747984	0.589866	0.0756324	0.597727	0.076467	0.605627	0.0773023	0.613567	0.0781382	0.621545	0.0789747	0.578054	0.0745	0.579302	0.0745	0.576811	0.0745	0.573073	0.0739651	0.624873	0.0771519	0.642339	0.0772586	0.628431	0.07793	0.631226	0.0781957	0.632291	0.0782127	0.61823	0.0774032
Plot name	Concordia4	0.602916	0.0769518	0.581994	0.074827	0.589816	0.0756613	0.597677	0.0764963	0.605576	0.0773318	0.613515	0.0781681	0.621492	0.079005	0.578054	0.0745	0.579658	0.0745381	0.578054	0.0746336	0.580838	0.0747984	0.624601	0.0772715	0.64217	0.0773683	0.628316	0.0780634	0.631114	0.0783278	0.632193	0.0783092	0.618091	0.0774893
Plot Type	1	0.602829	0.0769584	0.581852	0.0748533	0.589672	0.0756879	0.59753	0.0765231	0.605427	0.077359	0.613363	0.0781956	0.621338	0.0790328	0.579658	0.074672	0.581265	0.0747098	0.579658	0.074806	0.588642	0.0756324	0.62379	0.0773843	0.641666	0.0774744	0.627985	0.0781873	0.630788	0.0784502	0.631907	0.0784007	0.617679	0.0775685
1st free col	37	0.606115	0.0771987	0.581627	0.0748751	0.589443	0.07571	0.597298	0.0765455	0.605192	0.0773816	0.613124	0.0782184	0.621096	0.0790559	0.581265	0.0748441	0.582873	0.0748816	0.581265	0.0749783	0.596484	0.076467	0.622457	0.0774882	0.640831	0.0775761	0.627438	0.0783008	0.630252	0.078562	0.631434	0.0784864	0.617002	0.0776395
Sigma Level	2	0.610024	0.0777259	0.581339	0.0748908	0.58915	0.0757258	0.597	0.0765615	0.604889	0.0773978	0.612817	0.0782348	0.620784	0.0790724	0.582873	0.0750162	0.584482	0.0750534	0.582873	0.0751507	0.604365	0.0773023	0.620627	0.0775811	0.639673	0.0776725	0.626682	0.0784028	0.62951	0.0786622	0.630778	0.0785657	0.616074	0.0777006
Absolute Errs	FALSE	IsoLine	IsoLine	0.58101	0.0748989	0.588816	0.075734	0.596661	0.0765698	0.604545	0.0774062	0.612467	0.0782433	0.620429	0.079081	0.584482	0.0751883	0.586093	0.0752252	0.584482	0.0753232	0.612285	0.0781382	0.618337	0.0776612	0.638202	0.0777628	0.625722	0.0784924	0.628568	0.0787498	0.629946	0.0786378	0.614913	0.0777509
Symbol Type	1			0.580667	0.0748989	0.588468	0.075734	0.596307	0.0765698	0.604185	0.0774062	0.612102	0.0782433	0.620058	0.079081	0.586093	0.0753604	0.587706	0.0753971	0.586093	0.0754956	0.620244	0.0789747	0.615631	0.077727	0.636429	0.0778461	0.624566	0.078569	0.627434	0.0788243	0.628943	0.0787021	0.61354	0.0777893
Inverse Plot	FALSE			0.580338	0.0748908	0.588133	0.0757258	0.595968	0.0765615	0.603841	0.0773978	0.611752	0.0782348	0.619703	0.0790724	0.587706	0.0755326	0.589321	0.0755689	0.587706	0.0756681	IsoLine	IsoLine	0.612561	0.0777772	0.63437	0.0779217	0.623226	0.0786318	0.626119	0.0788848	0.627779	0.0787581	0.611984	0.077815
Color Plot	FALSE			0.580049	0.0748751	0.58784	0.07571	0.59567	0.0765455	0.603538	0.0773816	0.611445	0.0782184	0.619391	0.0790559	0.589321	0.0757048	0.590937	0.0757408	0.589321	0.0758406			0.609187	0.0778107	0.632043	0.0779892	0.621711	0.0786804	0.624633	0.078931	0.626464	0.0788053	0.610273	0.0778276
3D plot	FALSE			0.579825	0.0748533	0.587612	0.0756879	0.595438	0.0765231	0.603303	0.077359	0.611206	0.0781956	0.619149	0.0790328	0.590937	0.075877	0.592555	0.0759128	0.590937	0.0760132			0.605576	0.0778271	0.629468	0.0780477	0.620035	0.0787143	0.622989	0.0789624	0.625008	0.0788432	0.608443	0.0778269
Linear	FALSE			0.579682	0.074827	0.587468	0.0756613	0.595291	0.0764963	0.603154	0.0773318	0.611055	0.0781681	0.618995	0.079005	0.592555	0.0760492	0.594174	0.0760847	0.592555	0.0761857			0.601796	0.0778258	0.626666	0.0780969	0.618212	0.0787332	0.621201	0.0789787	0.623424	0.0788717	0.606527	0.0778127
Data Range	H19:L24			0.579633	0.0747984	0.587418	0.0756324	0.595241	0.076467	0.603103	0.0773023	0.611003	0.0781382	0.618942	0.0789747	0.594174	0.0762215	0.595795	0.0762567	0.594174	0.0763583			0.597923	0.077807	0.623661	0.0781364	0.616258	0.0787369	0.619285	0.0789799	0.621726	0.0788903	0.604564	0.0777855
Filled Symbols	FALSE			0.579682	0.0747698	0.587468	0.0756034	0.595291	0.0764377	0.603154	0.0772727	0.611055	0.0781082	0.618995	0.0789445	0.595795	0.0763938	0.597418	0.0764287	0.595795	0.0765309			0.59403	0.077771	0.62048	0.0781657	0.61419	0.0787255	0.617256	0.0789659	0.619928	0.0788991	0.602591	0.0777457
ConcAge	TRUE			0.579825	0.0747435	0.587612	0.0755769	0.595438	0.0764108	0.603303	0.0772455	0.611206	0.0780807	0.619149	0.0789166	0.597418	0.0765662	0.599042	0.0766007	0.597418	0.0767036			0.590195	0.0777185	0.617148	0.0781847	0.612025	0.078699	0.615132	0.0789368	0.618046	0.0788978	0.600647	0.0776941
ConcSwap	FALSE			0.580049	0.0747217	0.58784	0.0755548	0.59567	0.0763885	0.603538	0.0772229	0.611445	0.0780579	0.619391	0.0788935	0.599042	0.0767385	0.600668	0.0767728	0.599042	0.0768763			0.586491	0.0776506	0.613695	0.0781931	0.609781	0.0786577	0.612931	0.0788928	0.616095	0.0788865	0.59877	0.0776317
1st Symbol-row	1			0.580338	0.0747061	0.588133	0.075539	0.595968	0.0763725	0.603841	0.0772067	0.611752	0.0780415	0.619703	0.078877	0.600668	0.0769109	0.602296	0.0769449	0.600668	0.077049			0.58299	0.0775686	0.610151	0.078191	0.607478	0.0786018	0.610672	0.0788344	0.614093	0.0788653	0.596997	0.0775597
				0.580667	0.0746979	0.588468	0.0755307	0.596307	0.0763642	0.604185	0.0771983	0.612102	0.078033	0.620058	0.0788684	0.602296	0.0770833	0.603925	0.077117	0.602296	0.0772217			0.579762	0.077474	0.606544	0.0781783	0.605135	0.0785319	0.608374	0.0787621	0.612056	0.0788344	0.595361	0.0774796
				0.58101	0.0746979	0.588816	0.0755307	0.596661	0.0763642	0.604545	0.0771983	0.612467	0.078033	0.620429	0.0788684	0.603925	0.0772557	0.605556	0.0772892	0.603925	0.0773945			0.576868	0.0773687	0.602906	0.0781551	0.602772	0.0784486	0.606057	0.0786764	0.610001	0.078794	0.593896	0.0773929
				0.581339	0.0747061	0.58915	0.075539	0.597	0.0763725	0.604889	0.0772067	0.612817	0.0780415	0.620784	0.078877	0.605556	0.0774282	0.607189	0.0774613	0.605556	0.0775673			0.574365	0.0772548	0.599269	0.0781217	0.60041	0.0783526	0.60374	0.0785781	0.607947	0.0787446	0.592628	0.0773012
				0.581627	0.0747217	0.589443	0.0755548	0.597298	0.0763885	0.605192	0.0772229	0.613124	0.0780579	0.621096	0.0788935	0.607189	0.0776007	0.608823	0.0776336	0.607189	0.0777401			0.572302	0.0771344	0.595663	0.0780783	0.598069	0.0782447	0.601444	0.078468	0.60591	0.0786864	0.591583	0.0772064
				0.581852	0.0747435	0.589672	0.0755769	0.59753	0.0764108	0.605427	0.0772455	0.613363	0.0780807	0.621338	0.0789166	0.608823	0.0777732	0.610459	0.0778058	0.608823	0.0779129			0.570719	0.07701	0.592118	0.0780252	0.595768	0.0781259	0.599187	0.0783471	0.603909	0.07862	0.590782	0.0771103
				0.581994	0.0747698	0.589816	0.0756034	0.597677	0.0764377	0.605576	0.0772727	0.613515	0.0781082	0.621492	0.0789445	0.610459	0.0779458	0.612097	0.077978	0.610459	0.0780858			0.569646	0.0768839	0.588666	0.077963	0.593528	0.077997	0.59699	0.0782164	0.601959	0.078546	0.59024	0.0770148
				0.582043	0.0747984	0.589866	0.0756324	0.597727	0.076467	0.605627	0.0773023	0.613567	0.0781382	0.621545	0.0789747	0.612097	0.0781184	0.613736	0.0781503	0.612097	0.0782587			0.569105	0.0767585	0.585335	0.0778922	0.591366	0.0778593	0.59487	0.0780771	0.600079	0.0784651	0.589967	0.0769218
				ConcTikEll	ConcTikEll	ConcTikEll	ConcTikEll	ConcTikEll	ConcTikEll	ConcTikEll	ConcTikEll	ConcTikEll	ConcTikEll	ConcTikEll	ConcTikEll	0.613736	0.078291	0.615377	0.0783226	0.613736	0.0784316			0.569106	0.0766364	0.582154	0.0778134	0.589303	0.0777139	0.592846	0.0779302	0.598283	0.0783778	0.589968	0.0768329
																0.615377	0.0784636	0.61702	0.078495	0.615377	0.0786046			0.569649	0.0765199	0.579151	0.0777272	0.587355	0.0775621	0.590936	0.0777771	0.596587	0.0782849	0.590245	0.0767501
																0.61702	0.0786363	0.618664	0.0786674	0.61702	0.0787776			0.570724	0.0764113	0.57635	0.0776344	0.585539	0.0774051	0.589155	0.077619	0.595007	0.0781873	0.59079	0.0766748
																0.618664	0.078809	0.62031	0.0788397	0.618664	0.0789506			0.572309	0.0763127	0.573776	0.0775358	0.583871	0.0772443	0.587519	0.0774574	0.593554	0.0780857	0.591595	0.0766086
																0.62031	0.0789817	0.621958	0.0790122	0.62031	0.0791236			0.574374	0.076226	0.57145	0.0774322	0.582364	0.0770811	0.586041	0.0772936	0.592242	0.0779811	0.592642	0.0765527
																0.621958	0.0791544	0.623607	0.0791846	0.621958	0.0792967			0.576878	0.0761529	0.569393	0.0773245	0.581032	0.0769168	0.584735	0.0771289	0.591081	0.0778743	0.593912	0.0765083
																0.623607	0.0793272	0.625258	0.0793571	0.623607	0.0794698			0.579773	0.0760947	0.567622	0.0772136	0.579886	0.0767529	0.583611	0.0769649	0.590082	0.0777662	0.59538	0.0764762
																0.625258	0.0795	0.626627	0.0795	0.623895	0.0795			0.583003	0.0760528	0.566152	0.0771005	0.578935	0.0765907	0.582679	0.0768028	0.589253	0.0776578	0.597017	0.0764569
																0.625258	0.0795	ConcBand	ConcBand	ConcBand	ConcBand			0.586504	0.0760278	0.564995	0.0769861	0.578189	0.0764317	0.581947	0.0766441	0.588602	0.0775499	0.598792	0.076451
																IsoLine	IsoLine							0.590208	0.0760202	0.564162	0.0768714	0.577652	0.0762772	0.581421	0.0764902	0.588133	0.0774436	0.60067	0.0764585
																								0.594044	0.0760303	0.56366	0.0767574	0.577331	0.0761284	0.581106	0.0763423	0.587851	0.0773397	0.602614	0.0764792
																								0.597937	0.0760578	0.563493	0.0766451	0.577227	0.0759868	0.581004	0.0762017	0.587758	0.077239	0.604587	0.0765128
																								0.60181	0.0761021	0.563662	0.0765353	0.577341	0.0758534	0.581117	0.0760696	0.587855	0.0771426	0.60655	0.0765587
																								0.605589	0.0761624	0.564166	0.0764292	0.577673	0.0757295	0.581443	0.0759471	0.588142	0.0770511	0.608465	0.0766158
																								0.6092	0.0762376	0.565	0.0763275	0.57822	0.075616	0.581979	0.0758353	0.588615	0.0769653	0.610295	0.0766831
																								0.612573	0.0763261	0.566158	0.0762311	0.578976	0.0755141	0.582721	0.0757352	0.58927	0.076886	0.612003	0.0767593
																								0.615641	0.0764263	0.56763	0.0761409	0.579936	0.0754244	0.583663	0.0756475	0.590103	0.076814	0.613558	0.076843
																								0.618346	0.0765362	0.569403	0.0760575	0.581091	0.0753478	0.584796	0.0755731	0.591106	0.0767496	0.614928	0.0769324
																								0.620635	0.0766536	0.571461	0.0759819	0.582432	0.075285	0.586112	0.0755125	0.59227	0.0766937	0.616087	0.0770258
																								0.622462	0.0767763	0.573788	0.0759145	0.583947	0.0752364	0.587598	0.0754663	0.593585	0.0766465	0.617012	0.0771215
																								0.623794	0.0769019	0.576364	0.0758559	0.585623	0.0752025	0.589242	0.0754349	0.595041	0.0766085	0.617686	0.0772175
																								0.624603	0.0770279	0.579166	0.0758067	0.587445	0.0751836	0.591029	0.0754186	0.596625	0.0765801	0.618094	0.0773121
																								0.624873	0.0771519	0.58217	0.0757673	0.589399	0.0751799	0.592946	0.0754174	0.598323	0.0765614	0.61823	0.0774032
																								Black	Black	0.585352	0.0757379	0.591468	0.0751913	0.594975	0.0754315	0.60012	0.0765527
																										0.588683	0.075719	0.593633	0.0752178	0.597099	0.0754606	0.602003	0.076554
																										0.592136	0.0757105	0.595877	0.0752591	0.5993	0.0755045	0.603953	0.0765653
																										0.595681	0.0757126	0.59818	0.075315	0.601559	0.0755629	0.605956	0.0765864
																										0.599288	0.0757253	0.600523	0.0753849	0.603857	0.0756353	0.607993	0.0766173
																										0.602925	0.0757485	0.602885	0.0754682	0.606174	0.0757209	0.610048	0.0766577
																										0.606563	0.0757819	0.605247	0.0755642	0.608491	0.0758192	0.612102	0.0767072
																										0.610169	0.0758254	0.607589	0.0756721	0.610787	0.0759293	0.614139	0.0767654
																										0.613713	0.0758784	0.60989	0.0757909	0.613044	0.0760502	0.61614	0.0768317
																										0.617166	0.0759406	0.61213	0.0759198	0.615241	0.0761809	0.61809	0.0769057
																										0.620496	0.0760114	0.614291	0.0760575	0.617361	0.0763203	0.61997	0.0769867
																										0.623677	0.0760902	0.616355	0.0762029	0.619385	0.0764671	0.621766	0.077074
																										0.626681	0.0761764	0.618303	0.0763547	0.621295	0.0766202	0.623461	0.0771668
																										0.629482	0.0762692	0.620119	0.0765117	0.623076	0.0767783	0.625042	0.0772645
																										0.632056	0.0763678	0.621787	0.0766725	0.624712	0.0769399	0.626495	0.077366
																										0.634382	0.0764714	0.623294	0.0768357	0.62619	0.0771038	0.627807	0.0774707
																										0.636439	0.0765792	0.624626	0.077	0.627496	0.0772684	0.628968	0.0775775
																										0.63821	0.07669	0.625772	0.0771639	0.62862	0.0774325	0.629967	0.0776856
																										0.63968	0.0768032	0.626722	0.0773261	0.629552	0.0775945	0.630795	0.077794
																										0.640836	0.0769175	0.627469	0.0774851	0.630284	0.0777532	0.631447	0.0779018
																										0.641669	0.0770322	0.628005	0.0776396	0.63081	0.0779072	0.631916	0.0780082
																										0.642171	0.0771462	0.628327	0.0777884	0.631125	0.0780551	0.632198	0.0781121
																										0.642339	0.0772586	0.628431	0.07793	0.631226	0.0781957	0.632291	0.0782127
																										Black	Black	Black	Black	Black	Black	Black	Black

## Sheet: PlotDat9
Source sheet	Data	0.594615	0.0761244	0.574259	0.0739651	0.582043	0.0747984	0.589866	0.0756324	0.597727	0.076467	0.605627	0.0773023	0.613567	0.0781382	0.568753	0.0735	0.569978	0.0735	0.567533	0.0735	0.573073	0.0739651	0.632703	0.0769013	0.626397	0.0769351	0.628362	0.0767051	0.617445	0.07658	0.625575	0.0771457	0.612104	0.076572
Plot name	Concordia6	0.595012	0.0761721	0.574211	0.0739934	0.581994	0.074827	0.589816	0.0756613	0.597677	0.0764963	0.605576	0.0773318	0.613515	0.0781681	0.568753	0.0735	0.57035	0.07354	0.568753	0.0736318	0.580838	0.0747984	0.632537	0.0770624	0.62626	0.077077	0.628224	0.0768292	0.617328	0.0766756	0.625468	0.0772576	0.611943	0.0766719
Plot Type	1	0.596365	0.0761766	0.574071	0.0740194	0.581852	0.0748533	0.589672	0.0756879	0.59753	0.0765231	0.605427	0.077359	0.613363	0.0781956	0.57035	0.073672	0.571948	0.0737117	0.57035	0.0738041	0.588642	0.0756324	0.632047	0.0772155	0.625856	0.0772112	0.627813	0.0769478	0.616981	0.0767675	0.625153	0.0773632	0.61147	0.0767639
1st free col	37	0.590296	0.0762277	0.57385	0.0740409	0.581627	0.0748751	0.589443	0.07571	0.597298	0.0765455	0.605192	0.0773816	0.613124	0.0782184	0.571948	0.0738441	0.573548	0.0738835	0.571948	0.0739765	0.596484	0.076467	0.631239	0.0773594	0.625189	0.0773365	0.627135	0.0770598	0.616405	0.0768547	0.624634	0.0774616	0.610692	0.0768461
Sigma Level	2	0.601158	0.0765244	0.573566	0.0740564	0.581339	0.0748908	0.58915	0.0757258	0.597	0.0765615	0.604889	0.0773978	0.612817	0.0782348	0.573548	0.0740162	0.575149	0.0740552	0.573548	0.0741489	0.604365	0.0773023	0.630118	0.0774926	0.624264	0.0774519	0.626193	0.0771643	0.615607	0.0769366	0.623915	0.0775521	0.609624	0.0769169
Absolute Errs	FALSE	IsoLine	IsoLine	0.573242	0.0740644	0.58101	0.0748989	0.588816	0.075734	0.596661	0.0765698	0.604545	0.0774062	0.612467	0.0782433	0.575149	0.0741883	0.576753	0.0742271	0.575149	0.0743213	0.612285	0.0781382	0.628693	0.0776142	0.62309	0.0775564	0.624998	0.0772603	0.614593	0.0770125	0.623001	0.0776338	0.608289	0.076975
Symbol Type	1			0.572904	0.0740644	0.580667	0.0748989	0.588468	0.075734	0.596307	0.0765698	0.604185	0.0774062	0.612102	0.0782433	0.576753	0.0743604	0.578358	0.0743989	0.576753	0.0744938	IsoLine	IsoLine	0.626979	0.0777231	0.621676	0.0776491	0.623558	0.0773471	0.613372	0.0770816	0.621901	0.077706	0.606711	0.0770193
Inverse Plot	FALSE			0.57258	0.0740564	0.580338	0.0748908	0.588133	0.0757258	0.595968	0.0765615	0.603841	0.0773978	0.611752	0.0782348	0.578358	0.0745326	0.579964	0.0745708	0.578358	0.0746662			0.624988	0.0778184	0.620035	0.0777291	0.621886	0.0774239	0.611953	0.0771435	0.620624	0.0777681	0.604921	0.0770488
Color Plot	FALSE			0.572296	0.0740409	0.580049	0.0748751	0.58784	0.07571	0.59567	0.0765455	0.603538	0.0773816	0.611445	0.0782184	0.579964	0.0747048	0.581572	0.0747427	0.579964	0.0748388			0.622738	0.0778992	0.61818	0.0777959	0.619996	0.0774901	0.61035	0.0771975	0.619181	0.0778197	0.602954	0.077063
3D plot	FALSE			0.572075	0.0740194	0.579825	0.0748533	0.587612	0.0756879	0.595438	0.0765231	0.603303	0.077359	0.611206	0.0781956	0.581572	0.074877	0.583182	0.0749146	0.581572	0.0750113			0.620248	0.0779649	0.616128	0.0778489	0.617905	0.077545	0.608576	0.0772433	0.617584	0.0778601	0.600849	0.0770617
Linear	FALSE			0.571935	0.0739934	0.579682	0.074827	0.587468	0.0756613	0.595291	0.0764963	0.603154	0.0773318	0.611055	0.0781681	0.583182	0.0750492	0.584793	0.0750866	0.583182	0.0751839			0.617539	0.0780148	0.613895	0.0778875	0.61563	0.0775883	0.606646	0.0772804	0.615847	0.0778892	0.598646	0.0770448
Data Range	H9:L18			0.571887	0.0739651	0.579633	0.0747984	0.587418	0.0756324	0.595241	0.076467	0.603103	0.0773023	0.611003	0.0781382	0.584793	0.0752215	0.586406	0.0752586	0.584793	0.0753565			0.614635	0.0780486	0.611502	0.0779115	0.61319	0.0776195	0.604577	0.0773086	0.613985	0.0779066	0.596389	0.0770127
Filled Symbols	FALSE			0.571935	0.0739368	0.579682	0.0747698	0.587468	0.0756034	0.595291	0.0764377	0.603154	0.0772727	0.611055	0.0781082	0.586406	0.0753938	0.588021	0.0754306	0.586406	0.0755291			0.61156	0.0780661	0.608967	0.0779206	0.610607	0.0776385	0.602385	0.0773275	0.612013	0.0779123	0.594121	0.076966
ConcAge	TRUE			0.572075	0.0739108	0.579825	0.0747435	0.587612	0.0755769	0.595438	0.0764108	0.603303	0.0772455	0.611206	0.0780807	0.588021	0.0755661	0.589637	0.0756026	0.588021	0.0757017			0.60834	0.0780669	0.606314	0.0779149	0.607903	0.0776449	0.600091	0.077337	0.609949	0.0779061	0.591886	0.0769056
ConcSwap	FALSE			0.572296	0.0738893	0.580049	0.0747217	0.58784	0.0755548	0.59567	0.0763885	0.603538	0.0772229	0.611445	0.0780579	0.589637	0.0757385	0.591255	0.0757747	0.589637	0.0758744			0.605003	0.0780512	0.603564	0.0778942	0.6051	0.0776389	0.597712	0.0773371	0.60781	0.0778881	0.589728	0.0768327
1st Symbol-row	1			0.57258	0.0738738	0.580338	0.0747061	0.588133	0.075539	0.595968	0.0763725	0.603841	0.0772067	0.611752	0.0780415	0.591255	0.0759109	0.592875	0.0759468	0.591255	0.0760471			0.601578	0.078019	0.600741	0.0778589	0.602222	0.0776203	0.595271	0.0773277	0.605613	0.0778585	0.587689	0.0767487
				0.572904	0.0738658	0.580667	0.0746979	0.588468	0.0755307	0.596307	0.0763642	0.604185	0.0771983	0.612102	0.078033	0.592875	0.0760833	0.594496	0.0761189	0.592875	0.0762199			0.598093	0.0779707	0.59787	0.0778092	0.599295	0.0775894	0.592787	0.0773089	0.603379	0.0778175	0.585808	0.0766553
				0.573242	0.0738658	0.58101	0.0746979	0.588816	0.0755307	0.596661	0.0763642	0.604545	0.0771983	0.612467	0.078033	0.594496	0.0762557	0.596119	0.076291	0.594496	0.0763926			0.594579	0.0779066	0.594974	0.0777455	0.596342	0.0775465	0.590282	0.0772809	0.601126	0.0777655	0.584123	0.0765542
				0.573566	0.0738738	0.581339	0.0747061	0.58915	0.075539	0.597	0.0763725	0.604889	0.0772067	0.612817	0.0780415	0.596119	0.0764282	0.597744	0.0764632	0.596119	0.0765654			0.591065	0.0778273	0.592078	0.0776684	0.59339	0.0774919	0.587777	0.0772439	0.598874	0.0777028	0.582666	0.0764475
				0.57385	0.0738893	0.581627	0.0747217	0.589443	0.0755548	0.597298	0.0763885	0.605192	0.0772229	0.613124	0.0780579	0.597744	0.0766007	0.59937	0.0766354	0.597744	0.0767382			0.587581	0.0777335	0.589207	0.0775786	0.590463	0.0774261	0.585293	0.0771982	0.59664	0.0776302	0.581464	0.0763371
				0.574071	0.0739108	0.581852	0.0747435	0.589672	0.0755769	0.59753	0.0764108	0.605427	0.0772455	0.613363	0.0780807	0.59937	0.0767732	0.600998	0.0768076	0.59937	0.0769111			0.584157	0.077626	0.586386	0.0774767	0.587587	0.0773496	0.582853	0.0771442	0.594446	0.077548	0.580543	0.0762253
				0.574211	0.0739368	0.581994	0.0747698	0.589816	0.0756034	0.597677	0.0764377	0.605576	0.0772727	0.613515	0.0781082	0.600998	0.0769458	0.602627	0.0769799	0.600998	0.0770839			0.580823	0.0775056	0.583639	0.0773637	0.584785	0.0772631	0.580475	0.0770825	0.592308	0.0774572	0.579919	0.0761143
				0.574259	0.0739651	0.582043	0.0747984	0.589866	0.0756324	0.597727	0.076467	0.605627	0.0773023	0.613567	0.0781382	0.602627	0.0771184	0.604258	0.0771522	0.602627	0.0772568			0.577606	0.0773735	0.580988	0.0772405	0.582082	0.0771674	0.578182	0.0770134	0.590246	0.0773584	0.579605	0.0760061
				ConcTikEll	ConcTikEll	ConcTikEll	ConcTikEll	ConcTikEll	ConcTikEll	ConcTikEll	ConcTikEll	ConcTikEll	ConcTikEll	ConcTikEll	ConcTikEll	0.604258	0.077291	0.605891	0.0773245	0.604258	0.0774298			0.574534	0.0772307	0.578457	0.0771082	0.579501	0.0770631	0.575991	0.0769376	0.588277	0.0772525	0.579607	0.075903
																0.605891	0.0774636	0.607526	0.0774968	0.605891	0.0776027			0.571633	0.0770784	0.576068	0.076968	0.577064	0.0769514	0.573923	0.0768558	0.586418	0.0771404	0.579925	0.0758068
																0.607526	0.0776363	0.609162	0.0776692	0.607526	0.0777757			0.568929	0.076918	0.57384	0.0768209	0.574792	0.076833	0.571995	0.0767686	0.584685	0.077023	0.580553	0.0757195
																0.609162	0.077809	0.6108	0.0778416	0.609162	0.0779487			0.566444	0.0767509	0.571792	0.0766683	0.572704	0.076709	0.570222	0.0766769	0.583092	0.0769014	0.581478	0.0756428
																0.6108	0.0779817	0.612439	0.078014	0.6108	0.0781218			0.564199	0.0765784	0.569943	0.0765115	0.570817	0.0765805	0.568621	0.0765812	0.581654	0.0767765	0.582682	0.0755782
																0.612439	0.0781544	0.61408	0.0781865	0.612439	0.0782948			0.562214	0.076402	0.568308	0.0763518	0.569149	0.0764485	0.567205	0.0764826	0.580382	0.0766495	0.584142	0.0755269
																0.61408	0.0783272	0.615723	0.078359	0.61408	0.0784679			0.560505	0.0762233	0.5669	0.0761905	0.567712	0.0763142	0.565986	0.0763818	0.579287	0.0765214	0.58583	0.0754899
																0.615723	0.0785	0.617068	0.0785	0.614385	0.0785			0.559087	0.0760437	0.565732	0.0760291	0.56652	0.0761787	0.564974	0.0762796	0.578378	0.0763934	0.587713	0.075468
																0.615723	0.0785	ConcBand	ConcBand	ConcBand	ConcBand			0.557972	0.0758648	0.564814	0.0758689	0.565583	0.0760432	0.564178	0.0761771	0.577664	0.0762665	0.589754	0.0754615
																IsoLine	IsoLine							0.55717	0.0756882	0.564154	0.0757113	0.564908	0.0759089	0.563606	0.0760749	0.577151	0.0761418	0.591913	0.0754706
																								0.556687	0.0755152	0.563757	0.0755577	0.564502	0.0757768	0.56326	0.0759741	0.576842	0.0760203	0.594149	0.0754952
																								0.556528	0.0753474	0.563627	0.0754092	0.564368	0.0756482	0.563146	0.0758754	0.576741	0.0759031	0.596417	0.0755347
																								0.556694	0.0751863	0.563764	0.0752673	0.564506	0.075524	0.563263	0.0757797	0.576848	0.0757913	0.598674	0.0755884
																								0.557183	0.0750332	0.564168	0.0751331	0.564917	0.0754055	0.563611	0.0756879	0.577163	0.0756857	0.600876	0.0756552
																								0.557992	0.0748894	0.564835	0.0750078	0.565595	0.0752935	0.564186	0.0756006	0.577682	0.0755872	0.60298	0.0757338
																								0.559113	0.0747561	0.56576	0.0748924	0.566537	0.075189	0.564984	0.0755187	0.578401	0.0754968	0.604944	0.0758227
																								0.560537	0.0746345	0.566934	0.0747879	0.567732	0.075093	0.565998	0.0754429	0.579315	0.0754151	0.606731	0.0759202
																								0.562252	0.0745256	0.568348	0.0746952	0.569172	0.0750062	0.56722	0.0753737	0.580415	0.0753429	0.608307	0.0760244
																								0.564243	0.0744303	0.569989	0.0746151	0.570844	0.0749294	0.568638	0.0753119	0.581692	0.0752808	0.609639	0.0761332
																								0.566493	0.0743495	0.571844	0.0745484	0.572734	0.0748632	0.570241	0.0752578	0.583135	0.0752292	0.610703	0.0762445
																								0.568983	0.0742839	0.573896	0.0744954	0.574825	0.0748082	0.572015	0.075212	0.584732	0.0751888	0.611477	0.0763562
																								0.571691	0.0742339	0.576129	0.0744568	0.5771	0.074765	0.573945	0.0751749	0.586469	0.0751597	0.611947	0.0764661
																								0.574596	0.0742001	0.578522	0.0744328	0.57954	0.0747337	0.576015	0.0751468	0.588331	0.0751422	0.612104	0.076572
																								0.577671	0.0741827	0.581057	0.0744236	0.582123	0.0747148	0.578206	0.0751279	0.590303	0.0751366
																								0.58089	0.0741818	0.58371	0.0744294	0.584827	0.0747083	0.580501	0.0751184	0.592367	0.0751428
																								0.584227	0.0741975	0.58646	0.07445	0.58763	0.0747144	0.582879	0.0751183	0.594506	0.0751608
																								0.587652	0.0742297	0.589283	0.0744854	0.590508	0.0747329	0.58532	0.0751277	0.596702	0.0751904
																								0.591137	0.074278	0.592154	0.0745351	0.593435	0.0747638	0.587804	0.0751465	0.598936	0.0752314
																								0.594652	0.0743421	0.59505	0.0745988	0.596388	0.0748067	0.590309	0.0751745	0.601189	0.0752834
																								0.598166	0.0744214	0.597946	0.0746759	0.59934	0.0748613	0.592814	0.0752115	0.603442	0.0753461
																								0.60165	0.0745152	0.600817	0.0747657	0.602267	0.0749271	0.595298	0.0752572	0.605676	0.0754187
																								0.605073	0.0746228	0.603638	0.0748676	0.605143	0.0750036	0.597739	0.0753111	0.60787	0.0755008
																								0.608408	0.0747431	0.606385	0.0749806	0.607945	0.0750901	0.600116	0.0753729	0.610008	0.0755917
																								0.611625	0.0748753	0.609036	0.0751038	0.610648	0.0751859	0.60241	0.075442	0.61207	0.0756905
																								0.614697	0.0750181	0.611567	0.075236	0.613229	0.0752901	0.6046	0.0755177	0.614039	0.0757964
																								0.617597	0.0751703	0.613956	0.0753763	0.615666	0.0754019	0.606668	0.0755995	0.615898	0.0759085
																								0.620301	0.0753307	0.616184	0.0755234	0.617938	0.0755203	0.608596	0.0756867	0.617631	0.0760259
																								0.622787	0.0754978	0.618232	0.075676	0.620027	0.0756443	0.610369	0.0757785	0.619223	0.0761475
																								0.625032	0.0756703	0.620081	0.0758328	0.621913	0.0757728	0.61197	0.0758741	0.620662	0.0762724
																								0.627017	0.0758467	0.621716	0.0759925	0.623582	0.0759048	0.613386	0.0759728	0.621934	0.0763994
																								0.628726	0.0760254	0.623124	0.0761538	0.625018	0.0760391	0.614605	0.0760736	0.623029	0.0765274
																								0.630144	0.076205	0.624292	0.0763152	0.62621	0.0761745	0.615617	0.0761757	0.623937	0.0766555
																								0.631259	0.0763839	0.625209	0.0764754	0.627147	0.07631	0.616413	0.0762783	0.624651	0.0767824
																								0.632061	0.0765606	0.62587	0.076633	0.627822	0.0764444	0.616986	0.0763805	0.625165	0.0769071
																								0.632544	0.0767335	0.626267	0.0767866	0.628228	0.0765764	0.617331	0.0764813	0.625474	0.0770286
																								0.632703	0.0769013	0.626397	0.0769351	0.628362	0.0767051	0.617445	0.07658	0.625575	0.0771457
																								Black	Black	Black	Black	Black	Black	Black	Black	Black	Black

## Sheet: PlotDat10
Source sheet	Data	0.623322	0.0793059	0.605627	0.0773023	0.613567	0.0781382	0.621545	0.0789747	0.629563	0.0798119	0.637621	0.0806498	0.645718	0.0814883	0.653855	0.0823274	0.596795	0.0765	0.598091	0.0765	0.595505	0.0765	0.604365	0.0773023	0.660093	0.0802339	0.672369	0.0796877	0.658816	0.0806387	0.650056	0.0806604	0.660667	0.0810098	0.668546	0.0812209	0.644638	0.0802707
Plot name	Concordia5	0.630609	0.0794903	0.605576	0.0773318	0.613515	0.0781681	0.621492	0.079005	0.629509	0.0798425	0.637566	0.0806807	0.645663	0.0815195	0.653799	0.082359	0.596795	0.0765	0.598901	0.0765858	0.596795	0.0766373	0.612285	0.0781382	0.659932	0.0804018	0.671962	0.079825	0.658647	0.0808236	0.649851	0.0808159	0.660554	0.0811271	0.668252	0.0813747	0.644497	0.0803584
Plot Type	1	0.620501	0.0795209	0.605427	0.077359	0.613363	0.0781956	0.621338	0.0790328	0.629353	0.0798706	0.637408	0.0807091	0.645502	0.0815483	0.653636	0.0823881	0.598901	0.0767235	0.601009	0.0768089	0.598901	0.0768612	0.620244	0.0789747	0.659458	0.0805603	0.67075	0.0799557	0.658153	0.0809973	0.649251	0.0809541	0.660222	0.0812379	0.667381	0.0815182	0.644081	0.0804391
1st free col	41	0.629573	0.0799232	0.605192	0.0773816	0.613124	0.0782184	0.621096	0.0790559	0.629107	0.079894	0.637158	0.0807327	0.645248	0.0815721	0.653379	0.0824122	0.601009	0.076947	0.603121	0.077032	0.601009	0.0770852	0.628242	0.0798119	0.658676	0.0807082	0.668757	0.0800773	0.657337	0.0811585	0.648268	0.0810722	0.659674	0.0813412	0.665948	0.0816486	0.643397	0.0805112
Sigma Level	2	0.63489	0.0803595	0.604889	0.0773978	0.612817	0.0782348	0.620784	0.0790724	0.628791	0.0799107	0.636837	0.0807496	0.644922	0.0815892	0.653048	0.0824294	0.603121	0.0771706	0.605235	0.0772552	0.603121	0.0773092	0.636279	0.0806498	0.657593	0.0808441	0.666021	0.0801876	0.656207	0.0813056	0.646921	0.081168	0.658915	0.081436	0.663983	0.0817634	0.642459	0.0805733
Absolute Errs	FALSE	0.638562	0.0808463	0.604545	0.0774062	0.612467	0.0782433	0.620429	0.079081	0.62843	0.0799194	0.63647	0.0807584	0.64455	0.0815981	0.652671	0.0824384	0.605235	0.0773942	0.607352	0.0774785	0.605235	0.0775332	0.644357	0.0814883	0.656217	0.0809668	0.662596	0.0802842	0.654773	0.0814376	0.645237	0.0812395	0.65795	0.0815217	0.661522	0.0818604	0.641285	0.0806241
Symbol Type	1	IsoLine	IsoLine	0.604185	0.0774062	0.612102	0.0782433	0.620058	0.079081	0.628054	0.0799194	0.636089	0.0807584	0.644163	0.0815981	0.652277	0.0824384	0.607352	0.0776179	0.609471	0.0777018	0.607352	0.0777573	0.652474	0.0823274	0.65456	0.0810754	0.658548	0.0803655	0.653046	0.0815532	0.643248	0.0812854	0.656789	0.0815975	0.658615	0.0819376	0.639899	0.0806626
Inverse Plot	FALSE			0.603841	0.0773978	0.611752	0.0782348	0.619703	0.0790724	0.627693	0.0799107	0.635722	0.0807496	0.643791	0.0815892	0.6519	0.0824294	0.609471	0.0778416	0.611594	0.0779252	0.609471	0.0779814	IsoLine	IsoLine	0.652637	0.0811689	0.653957	0.0804296	0.651041	0.0816514	0.640992	0.0813048	0.655441	0.0816627	0.655317	0.0819936	0.638326	0.0806882
Color Plot	FALSE			0.603538	0.0773816	0.611445	0.0782184	0.619391	0.0790559	0.627377	0.079894	0.635401	0.0807327	0.643465	0.0815721	0.651569	0.0824122	0.611594	0.0780654	0.613719	0.0781486	0.611594	0.0782056			0.650464	0.0812465	0.648911	0.0804755	0.648776	0.0817315	0.638514	0.0812973	0.653917	0.0817168	0.651694	0.0820272	0.636598	0.0807003
3D plot	FALSE			0.603303	0.077359	0.611206	0.0781956	0.619149	0.0790328	0.62713	0.0798706	0.635151	0.0807091	0.643212	0.0815483	0.651312	0.0823881	0.613719	0.0782892	0.615847	0.078372	0.613719	0.0784298			0.64806	0.0813075	0.643509	0.0805022	0.646269	0.0817927	0.635862	0.0812631	0.652232	0.0817594	0.647814	0.0820379	0.634748	0.0806987
Linear	FALSE			0.603154	0.0773318	0.611055	0.0781681	0.618995	0.079005	0.626974	0.0798425	0.634993	0.0806807	0.643051	0.0815195	0.651148	0.082359	0.615847	0.0785131	0.617978	0.0785955	0.615847	0.0786541			0.645444	0.0813515	0.637856	0.0805093	0.643543	0.0818346	0.633088	0.0812027	0.650398	0.0817899	0.643755	0.0820254	0.632812	0.0806834
Data Range	H25:L35			0.603103	0.0773023	0.611003	0.0781382	0.618942	0.0789747	0.626921	0.0798119	0.634938	0.0806498	0.642995	0.0814883	0.651092	0.0823274	0.617978	0.078737	0.620112	0.078819	0.617978	0.0788784			0.64264	0.081378	0.632062	0.0804964	0.64062	0.0818567	0.630245	0.0811175	0.648432	0.0818083	0.639594	0.0819899	0.630828	0.0806547
Filled Symbols	FALSE			0.603154	0.0772727	0.611055	0.0781082	0.618995	0.0789445	0.626974	0.0797813	0.634993	0.0806188	0.643051	0.081457	0.651148	0.0822958	0.620112	0.0789609	0.622249	0.0790426	0.620112	0.0791028			0.63967	0.0813869	0.626239	0.080464	0.637526	0.0818588	0.62739	0.081009	0.64635	0.0818143	0.635414	0.0819322	0.628835	0.0806132
ConcAge	TRUE			0.603303	0.0772455	0.611206	0.0780807	0.619149	0.0789166	0.62713	0.0797532	0.635151	0.0805904	0.643212	0.0814283	0.651312	0.0822668	0.622249	0.0791849	0.624388	0.0792662	0.622249	0.0793272			0.636562	0.0813779	0.620502	0.0804127	0.634286	0.081841	0.624576	0.0808794	0.644171	0.0818079	0.631295	0.0818533	0.626871	0.0805596
ConcSwap	FALSE			0.603538	0.0772229	0.611445	0.0780579	0.619391	0.0788935	0.627377	0.0797299	0.635401	0.0805668	0.643465	0.0814044	0.651569	0.0822427	0.624388	0.079409	0.62653	0.0794899	0.624388	0.0795517			0.63334	0.0813513	0.614961	0.0803434	0.630929	0.0818035	0.62186	0.0807312	0.641913	0.0817891	0.627317	0.0817548	0.624974	0.0804951
1st Symbol-row	1			0.603841	0.0772067	0.611752	0.0780415	0.619703	0.078877	0.627693	0.0797131	0.635722	0.0805499	0.643791	0.0813874	0.6519	0.0822254	0.62653	0.079633	0.628675	0.0797136	0.62653	0.0797762			0.630033	0.0813073	0.609725	0.0802575	0.627482	0.0817464	0.619294	0.0805672	0.639594	0.0817582	0.623558	0.0816387	0.623182	0.0804209
				0.604185	0.0771983	0.612102	0.078033	0.620058	0.0788684	0.628054	0.0797044	0.636089	0.0805411	0.644163	0.0813785	0.652277	0.0822164	0.628675	0.0798572	0.630823	0.0799374	0.628675	0.0800007			0.626668	0.0812462	0.604895	0.0801567	0.623976	0.0816704	0.616928	0.0803908	0.637236	0.0817153	0.620091	0.0815071	0.62153	0.0803384
				0.604545	0.0771983	0.612467	0.078033	0.620429	0.0788684	0.62843	0.0797044	0.63647	0.0805411	0.64455	0.0813785	0.652671	0.0822164	0.630823	0.0800814	0.632974	0.0801612	0.630823	0.0802254			0.623275	0.0811685	0.600566	0.0800428	0.620441	0.081576	0.614809	0.0802052	0.634857	0.0816608	0.616983	0.0813626	0.620049	0.0802492
				0.604889	0.0772067	0.612817	0.0780415	0.620784	0.078877	0.628791	0.0797131	0.636837	0.0805499	0.644922	0.0813874	0.653048	0.0822254	0.632974	0.0803056	0.635127	0.0803851	0.632974	0.08045			0.619883	0.0810749	0.596822	0.0799183	0.616906	0.0814641	0.612976	0.0800141	0.632479	0.0815953	0.614296	0.0812081	0.618768	0.080155
				0.605192	0.0772229	0.613124	0.0780579	0.621096	0.0788935	0.629107	0.0797299	0.637158	0.0805668	0.645248	0.0814044	0.653379	0.0822427	0.635127	0.0805299	0.637284	0.080609	0.635127	0.0806747			0.61652	0.0809662	0.593735	0.0797854	0.613401	0.0813356	0.611467	0.0798213	0.630121	0.0815192	0.612081	0.0810466	0.617713	0.0800578
				0.605427	0.0772455	0.613363	0.0780807	0.621338	0.0789166	0.629353	0.0797532	0.637408	0.0805904	0.645502	0.0814283	0.653636	0.0822668	0.637284	0.0807542	0.639443	0.0808329	0.637284	0.0808994			0.613214	0.0808434	0.591366	0.0796468	0.609958	0.0811917	0.61031	0.0796304	0.627804	0.0814332	0.610381	0.0808812	0.616903	0.0799594
				0.605576	0.0772727	0.613515	0.0781082	0.621492	0.0789445	0.629509	0.0797813	0.637566	0.0806188	0.645663	0.081457	0.653799	0.0822958	0.639443	0.0809786	0.641605	0.0810569	0.639443	0.0811242			0.609996	0.0807075	0.58976	0.0795051	0.606604	0.0810334	0.609528	0.0794452	0.625548	0.081338	0.60923	0.0807151	0.616355	0.0798616
				0.605627	0.0773023	0.613567	0.0781382	0.621545	0.0789747	0.629563	0.0798119	0.637621	0.0806498	0.645718	0.0814883	0.653855	0.0823274	0.641605	0.081203	0.64377	0.081281	0.641605	0.0813491			0.60689	0.0805596	0.58895	0.0793631	0.603369	0.0808623	0.609136	0.0792694	0.623371	0.0812345	0.60865	0.0805515	0.616079	0.0797665
				ConcTikEll	ConcTikEll	ConcTikEll	ConcTikEll	ConcTikEll	ConcTikEll	ConcTikEll	ConcTikEll	ConcTikEll	ConcTikEll	ConcTikEll	ConcTikEll	ConcTikEll	ConcTikEll	0.64377	0.0814275	0.645937	0.081505	0.64377	0.0815739			0.603925	0.080401	0.588951	0.0792236	0.600279	0.0806797	0.609142	0.0791062	0.621292	0.0811235	0.608652	0.0803937	0.616081	0.0796758
																		0.645937	0.081652	0.648108	0.0817292	0.645937	0.0817989			0.601126	0.080233	0.589762	0.0790893	0.597363	0.0804873	0.609545	0.078959	0.61933	0.081006	0.609236	0.0802447	0.61636	0.0795914
																		0.648108	0.0818765	0.650281	0.0819534	0.648108	0.0820238			0.598516	0.0800572	0.591369	0.0789628	0.594644	0.0802866	0.610339	0.0788306	0.6175	0.080883	0.610391	0.0801074	0.616911	0.0795148
																		0.650281	0.0821011	0.652458	0.0821776	0.650281	0.0822489			0.596117	0.0798749	0.593739	0.0788466	0.592145	0.0800793	0.611506	0.0787234	0.615818	0.0807555	0.612094	0.0799844	0.617724	0.0794476
																		0.652458	0.0823258	0.654637	0.0824019	0.652458	0.0824739			0.593951	0.0796878	0.596827	0.0787429	0.589888	0.0798673	0.613026	0.0786395	0.6143	0.0806247	0.614313	0.0798783	0.618783	0.079391
																		0.654637	0.0825505	0.656819	0.0826262	0.654637	0.0826991			0.592035	0.0794974	0.600572	0.0786537	0.587893	0.0796524	0.614867	0.0785807	0.612957	0.0804916	0.617003	0.079791	0.620066	0.0793462
																		0.656819	0.0827752	0.659004	0.0828506	0.656819	0.0829242			0.590386	0.0793054	0.604903	0.0785809	0.586176	0.0794363	0.616995	0.0785479	0.611801	0.0803573	0.620113	0.0797242	0.62155	0.0793141
																		0.659004	0.083	0.660461	0.083	0.657554	0.083			0.589018	0.0791134	0.609733	0.0785257	0.584751	0.0792209	0.619367	0.078542	0.610842	0.0802231	0.623582	0.0796793	0.623204	0.0792952
																		0.659004	0.083	ConcBand	ConcBand	ConcBand	ConcBand			0.587943	0.078923	0.61497	0.0784893	0.583632	0.0790081	0.621938	0.0785629	0.610088	0.08009	0.627343	0.0796571	0.624998	0.0792899
																		IsoLine	IsoLine							0.587169	0.0787359	0.620511	0.0784724	0.582827	0.0787997	0.624658	0.0786103	0.609546	0.0799593	0.631322	0.079658	0.626895	0.0792984
																										0.586705	0.0785537	0.626248	0.0784753	0.582343	0.0785974	0.627473	0.0786832	0.60922	0.0798319	0.635442	0.0796821	0.62886	0.0793204
																										0.586552	0.0783779	0.632071	0.0784979	0.582186	0.078403	0.630329	0.0787803	0.609113	0.0797091	0.639623	0.0797288	0.630853	0.0793556
																										0.586713	0.07821	0.637865	0.0785399	0.582355	0.0782182	0.633171	0.0788997	0.609226	0.0795918	0.643783	0.0797973	0.632837	0.0794033
																										0.587187	0.0780514	0.643518	0.0786004	0.582849	0.0780444	0.635942	0.0790389	0.609558	0.079481	0.647841	0.0798862	0.634771	0.0794625
																										0.587969	0.0779036	0.64892	0.0786782	0.583665	0.0778833	0.63859	0.0791954	0.610106	0.0793777	0.651719	0.0799937	0.63662	0.079532
																										0.589052	0.0777677	0.653965	0.0787718	0.584795	0.0777361	0.641062	0.079366	0.610865	0.0792829	0.655341	0.0801179	0.638347	0.0796106
																										0.590428	0.077645	0.658555	0.0788794	0.586229	0.0776042	0.64331	0.0795475	0.61183	0.0791972	0.658636	0.0802563	0.639917	0.0796966
																										0.592084	0.0775364	0.662602	0.0789989	0.587956	0.0774886	0.645291	0.0797363	0.612991	0.0791214	0.66154	0.0804061	0.641302	0.0797885
																										0.594007	0.0774429	0.666026	0.0791279	0.589961	0.0773903	0.646966	0.0799287	0.614339	0.0790562	0.663998	0.0805645	0.642473	0.0798844
																										0.59618	0.0773653	0.668761	0.079264	0.592226	0.0773102	0.648302	0.080121	0.615863	0.0790021	0.66596	0.0807284	0.643407	0.0799825
																										0.598585	0.0773042	0.670753	0.0794045	0.594732	0.077249	0.649274	0.0803095	0.617548	0.0789596	0.667389	0.0808946	0.644088	0.0800809
																										0.601201	0.0772603	0.671963	0.0795467	0.597459	0.0772072	0.649863	0.0804905	0.619382	0.078929	0.668256	0.0810598	0.644501	0.0801775
																										0.604005	0.0772338	0.672369	0.0796877	0.600381	0.0771851	0.650056	0.0806604	0.621348	0.0789106	0.668546	0.0812209	0.644638	0.0802707
																										0.606974	0.0772249	Black	Black	0.603476	0.0771829	Black	Black	0.623429	0.0789046	Black	Black
																										0.610083	0.0772339			0.606716	0.0772007			0.625609	0.078911
																										0.613305	0.0772605			0.610073	0.0772383			0.627867	0.0789298
																										0.616612	0.0773045			0.613519	0.0772953			0.630186	0.0789607
																										0.619976	0.0773656			0.617025	0.0773714			0.632544	0.0790036
																										0.623369	0.0774433			0.620561	0.0774657			0.634923	0.0790581
																										0.626762	0.0775369			0.624096	0.0775776			0.637301	0.0791236
																										0.630125	0.0776456			0.6276	0.0777061			0.639659	0.0791997
																										0.63343	0.0777684			0.631044	0.0778501			0.641976	0.0792857
																										0.636649	0.0779043			0.634398	0.0780083			0.644232	0.0793809
																										0.639754	0.0780522			0.637633	0.0781795			0.646409	0.0794844
																										0.642719	0.0782108			0.640722	0.078362			0.648488	0.0795954
																										0.645519	0.0783788			0.643639	0.0785545			0.65045	0.0797129
																										0.648129	0.0785546			0.646358	0.0787552			0.65228	0.0798359
																										0.650528	0.0787369			0.648857	0.0789624			0.653962	0.0799634
																										0.652694	0.078924			0.651113	0.0791744			0.65548	0.0800942
																										0.65461	0.0791144			0.653109	0.0793894			0.656823	0.0802273
																										0.656259	0.0793064			0.654826	0.0796055			0.657979	0.0803616
																										0.657627	0.0794984			0.65625	0.0798208			0.658938	0.0804958
																										0.658702	0.0796888			0.65737	0.0800336			0.659692	0.0806289
																										0.659475	0.0798759			0.658175	0.0802421			0.660234	0.0807596
																										0.65994	0.0800581			0.658658	0.0804443			0.66056	0.080887
																										0.660093	0.0802339			0.658816	0.0806387			0.660667	0.0810098
																										Black	Black			Black	Black			Black	Black

## Sheet: Hoja3
RAB-1	207Pba	Ub	Pbb	Thb	206Pb	206Pbc	2 s	207Pbc	2 s	207Pbc	2 s	rhod	206Pb	2 s	207Pb	2 s	207Pb	2 s
Spot number	(cps)	(ppm)	(ppm)	U	204Pb	238U	%	235U	%	206Pb	%		238U	(Ma)	235U	(Ma)	206Pb	(Ma)	conc %
a03	3169.1	106.188	7.67901	0.129438	5843.3	0.596955	3.82123	0.0769244	0.960465	0.251349	0.0562829	3.69856	477.739	4.42413	475.3	14.6084	463.545	81.9587	103.062
a05	2225.86	86.0874	6.17562	0.132239	4053.69	0.601158	3.31868	0.0765244	1.48185	0.446518	0.0569754	2.96947	475.344	6.79403	477.968	12.7312	490.58	65.4966	96.8944
a06	13316.1	316.502	24.5177	0.267958	453.087	0.602916	5.34265	0.0769518	1.31853	0.246793	0.0568246	5.17739	477.903	6.07625	479.082	20.6126	484.733	114.311	98.5908
a07	3327.77	127.153	9.54083	0.132596	6098.03	0.62043	2.77528	0.0798949	1.25901	0.453651	0.0563212	2.47327	495.496	6.0074	490.117	10.8472	465.054	54.7925	106.546
a08	3608.35	137.769	10.2703	0.118585	2753.47	0.636988	4.45637	0.0795355	1.60202	0.35949	0.0580857	4.15846	493.349	7.6132	500.44	17.7619	532.996	91.0589	92.5616
a09	3285.07	120.94	9.19743	0.199577	6008.53	0.620501	5.04538	0.0795209	2.40382	0.476439	0.0565926	4.43594	493.262	11.425	490.161	19.8083	475.694	98.0929	103.693
a12	3686.98	130.262	9.98746	0.21687	6682.41	0.63489	3.31741	0.0803595	1.47927	0.44591	0.0573007	2.96934	498.268	7.09697	499.137	13.1659	503.126	65.3529	99.0343
a13	2695.03	115.696	8.44144	0.236152	4924.08	0.596365	4.38393	0.0761766	1.57491	0.359246	0.0567792	4.09128	473.261	7.19043	474.924	16.767	482.967	90.3581	97.9902
a18	1936.22	76.0323	6.40876	0.889149	3547.72	0.595012	4.30985	0.0761721	1.87567	0.435206	0.0566537	3.88029	473.234	8.56403	474.063	16.4577	478.079	85.7706	98.9867
a19	9840.45	171.522	17.3354	0.210435	2844.89	0.874178	5.5445	0.103934	2.70486	0.487846	0.0610017	4.83996	637.421	16.4373	637.833	26.6047	639.295	104.104	99.7068
a20	1368.02	52.8446	4.51164	0.846288	2478.97	0.623322	4.82002	0.0793059	2.14398	0.444807	0.0570041	4.31694	491.978	10.1635	491.928	18.9687	491.691	95.1991	100.058
a21	3946.36	178.304	12.9438	0.0996041	7235.57	0.610024	2.98237	0.0777259	1.23402	0.413771	0.056922	2.71509	482.534	5.73971	483.575	11.5391	488.513	59.9071	98.7761
a22	1939.34	78.8857	6.22232	0.642598	2302.16	0.594615	5.23371	0.0761244	2.08683	0.398728	0.0566515	4.79967	472.948	9.52327	473.811	20.0121	477.991	106.094	98.9449
a23	3036.93	128.32	9.6843	0.161715	5526.57	0.629573	2.65844	0.0799232	1.41313	0.531565	0.057131	2.25175	495.664	6.74542	495.83	10.4826	496.593	49.6147	99.813
a24	2308.21	95.8334	8.31134	0.845266	4166.98	0.638562	3.83665	0.0808463	1.20435	0.313906	0.0572851	3.64273	501.172	5.80982	501.416	15.2964	502.526	80.1819	99.7305
a25	2200.9	64.6259	6.75271	0.858706	3877.07	0.794395	5.05279	0.0967925	0.837891	0.165827	0.0595242	4.98283	595.584	4.76852	593.662	22.9712	586.323	108.13	101.58
a26	71672.4	250.722	116.557	0.986132	58154.6	7.15218	2.38284	0.403966	1.77311	0.744116	0.128408	1.59186	2187.28	32.9726	2130.56	21.4521	2076.29	28.0313	105.345
a31	4042.42	173.296	12.3317	0.112663	7348.01	0.600242	4.49125	0.0759936	2.61232	0.581648	0.0572859	3.65336	472.164	11.9046	477.387	17.2513	502.558	80.4156	93.9522
a32	7717.01	342.357	24.541	0.116959	8396.49	0.609875	2.115	0.0769463	1.07853	0.509943	0.0574846	1.81934	477.87	4.96948	483.481	8.16834	510.174	39.9939	93.668
a33	2324.77	106.952	8.48553	0.452958	4140.26	0.642017	4.86451	0.0800586	1.67762	0.344869	0.0581617	4.56608	496.473	8.02125	503.554	19.4985	535.858	99.9359	92.65
a34	7142.29	289.854	21.3844	0.253713	1044.74	0.590296	3.75804	0.0762277	1.19037	0.316752	0.0561637	3.56453	473.567	5.43739	471.056	14.2636	458.845	79.0529	103.208
a36	4041.94	172.236	13.245	0.259843	4368.95	0.633208	3.57271	0.0793419	1.43947	0.402907	0.0578819	3.26989	492.194	6.82487	498.093	14.1631	525.294	71.6957	93.6987
a37	1936.71	79.659	6.40816	0.760218	3505.92	0.603456	3.29894	0.0762145	1.19064	0.360917	0.0574257	3.07659	473.488	5.43779	479.424	12.6854	507.921	67.6577	93.2208
a38	4314.56	174.598	13.2742	0.368579	5104.53	0.606115	3.38512	0.0771987	1.88673	0.557359	0.0569435	2.81057	479.38	8.72238	481.107	13.0548	489.346	62.005	97.9634
a39	5064.05	191.902	16.3516	0.852195	9102.54	0.634367	3.43901	0.079436	1.04628	0.304239	0.0579191	3.27598	492.755	4.96539	498.812	13.6448	526.703	71.812	93.5547
a41	1847.49	58.9602	4.58992	0.330693	3333.57	0.630609	5.41084	0.0794903	1.04759	0.19361	0.0575367	5.30846	493.08	4.97478	496.475	21.4728	512.163	116.655	96.274
a44	30109.3	492.137	45.3573	0.803541	270.392	0.661502	4.32317	0.0830425	0.721863	0.166975	0.0577736	4.26248	514.257	3.56901	515.532	17.629	521.187	93.5247	98.6705
a45	3666.34	112.526	8.15856	0.187021	6638.27	0.608016	2.62734	0.0766555	1.29137	0.491512	0.0575269	2.28807	476.129	5.92974	482.308	10.1377	511.788	50.2842	93.0324
a46	19870.2	60.6951	23.3267	0.72252	16543.9	5.98114	2.27509	0.346785	1.57431	0.691975	0.12509	1.64244	1919.23	26.1849	1973.1	19.9873	2030.07	29.0749	94.54
a47	3702.6	111.141	8.27115	0.280549	1714.91	0.607829	3.30498	0.0765608	1.56863	0.474625	0.0575803	2.90901	475.562	7.19528	482.19	12.7664	513.828	63.9079	92.5527
a48	4970.37	89.4006	12.3939	1.94269	8249.24	0.951074	3.00454	0.11029	1.26574	0.421278	0.0625428	2.72491	674.431	8.11029	678.662	14.9812	692.721	58.0961	97.3597
a50	1559.97	28.2857	2.9954	0.827451	2669.17	0.809334	6.2185	0.097871	1.74373	0.280411	0.0599753	5.96901	601.92	10.0286	602.08	28.6441	602.684	129.176	99.8732
a51	5714.53	123.144	8.85526	0.183499	8116.81	0.601486	3.72848	0.0759364	1.10145	0.295416	0.0574479	3.56207	471.822	5.01322	478.176	14.3193	508.771	78.3228	92.7375
a52	4203.72	97.2278	7.04779	0.183316	7618.87	0.600679	2.47614	0.0762194	1.04656	0.422657	0.0571578	2.2441	473.517	4.77978	477.665	9.47916	497.627	49.4376	95.1552
a53	2832.74	57.3752	4.18699	0.183348	5084.42	0.606176	4.51002	0.076693	1.37852	0.305656	0.0573247	4.29418	476.353	6.33296	481.146	17.4316	504.048	94.4968	94.5054
a54	2599.27	57.2194	4.13525	0.130849	4756.95	0.602829	3.47011	0.0769584	1.8888	0.544305	0.0568116	2.91103	477.942	8.70672	479.027	13.3392	484.226	64.2778	98.7023
a56	7126.37	107.022	9.29934	0.150084	808.373	0.724578	6.89672	0.0891927	1.56163	0.226431	0.0589189	6.71759	550.761	8.24895	553.366	29.8569	564.101	146.323	97.6352
a57	1977.53	33.1318	3.16631	0.912935	3500.67	0.718674	3.91144	0.0885996	1.80032	0.460271	0.05883	3.47249	547.25	9.45258	549.884	16.7448	560.812	75.6801	97.5816
a58	2397.64	29.7111	3.45662	0.725849	4027.43	0.938053	4.52699	0.110351	1.31039	0.28946	0.0616525	4.33319	674.785	8.4007	671.863	22.4959	662.075	92.8528	101.92
a within-run background-corrected mean 207Pb signal in counts per second
b U and Pb content and Th/U ratio were calculated relative to GJ-1 and are accurate to approximately 10%.
c corrected for background, mass bias, laser induced U-Pb fractionation and common Pb (if detectable, see analytical method) using
Stacey & Kramers (1975) model Pb composition. 207Pb/235U calculated using 207Pb/206Pb/(238U/206Pb × 1/137.88). Errors are
propagated by quadratic addition of within-run errors (2SE) and the reproducibility of GJ-1 (2SD).
d Rho is the error correlation defined as err206Pb/238U/err207Pb/235U.
