# Supplementary material for: A tectonic carpet of Variscan flysch at the base of a rootless accretionary prism in northwestern Iberia: U–Pb zircon age constrains from sediments and volcanic olistoliths
Source: Copernicus journal article supplement (doi:10.5194/se-12-835-2021), 2021-04-15
Supplement: Supplementary file 5 [file se-12-835-2021-supplement.zip › SUPP TABLES/Supplementary Table 18_Potential sources NW Iberia detrital zircon database.xlsx]

## Sheet: ISOPLOT-R ALL DOMAINS
OMZ	CIZ	GMTZ	WALZ-CZ
2672	644.8	580.3	575.9
3040	788.4	561.1	1991.1
518	752.4	583.3	2019.5
2632	624.9	536.8	542.3
1906	670.4	2102.7	1999.1
554	2329.3	548.9	3277.2
2364	693	565.4	2013.2
3292	2158.6	593.9	2111.6
2110	1113	537.8	2410
540	700	606.3	2856.9
1998	2136.6	537.7	2075.9
2136	2372.6	544.6	585.8
541	1130.3	632.7	568.1
1862	750.7	670.9	2912
591	1052.4	578.6	2149.7
571	2531.2	539.9	2934.1
597	2375.1	596.2	3016.2
1902	2594.8	532	1978.2
609	1875.3	571.2	592
572	679.7	533.3	1960
1864.9	626.1	1999.4	1988.5
596.8	957.9	2094.3	1989.1
789	1058.5	2121.8	2812.7
700	778.7	2055.6	2251.7
2809.9	954.6	585.8	1996.2
779.9	1137.6	524.8	1996.9
582.7	1006	535.7	2000.8
607.4	688.4	2028	2750.7
2662.2	1880.1	2489.2	2744.6
593.3	1861.1	2481.4	1954.7
747.8	928.4	546.4	587.7
2089	2648.7	564.6	576.5
1882.2	2584.9	591.4	2193.7
567.4	1012.4	575.7	2684.1
3041.6	1000	566.5	2021.6
1886.9	2635.2	610.2	2009.2
553.2	2471.5	2086	597.1
550.2	2062.2	2064.8	2419.7
1923.8	1880.2	2056.2	602.3
2179.9	665.8	553.9	2729.2
593.3	1823.3	565.1	2816.9
1934.4	961.2	575	2648.6
540.1	946.8	550	588
2028	799.8	534.7	728.1
2106.6	707.5	569.5	582.4
614.4	577.4	583	809.5
2181.2	623.2	587	2090
566.2	1884.1	559.4	2534.5
634.3	622.6	2105.9	579.8
651.2	650.6	578.3	2710.3
2082.2	686.1	567.6	1993.2
2026.6	598.6	589.5	2031.1
575.6	726	586.3	2010.6
544.3	1140.2	570.1	1979.6
566.2	652.4	574.2	570.5
622	577.4	567.8	2694
593.3	638.4	524.1	1993.9
826	2138.1	564	583.2
2035.1	720.8	2619	1998.1
1770.2	774.2	504.2	2709.8
2137.2	610.9	2692.7	591
923.3	576.8	2059.4	2457
944	629.6	2675.1	591.8
555.5	634.9	404.1	2003
609.1	647.7	1074.6	2036.5
2046.3	2606.7	1909.5	588.8
554.9	2158.8	654.3	2001
547.8	677.4	1978	2048.3
534.8	665.8	2732.8	2070.7
635.5	697.7	1944.2	588.3
578	644.8	2703	593.5
566.8	999.4	1391.4	1982.4
552	957.3	2081.3	1989.8
549.6	2396.6	1594.9	2029.7
580.3	970.2	2053.4	2052.2
573.8	605.6	570.1	608.4
620.9	807.8	1527.4	2616.7
2153	672.2	636.6	2022.6
605	666.4	2058.4	2041.7
619	658.8	551.6	1967.9
714	695.4	1452.6	2123.6
603	593.9	612.5	1998.8
615	987.4	615.5	2034.5
2122	671.6	948.4	2026
1870	634.3	592.1	1989.2
532	654.7	603.9	3027.8
774	660	565.6	1999.7
564	629	1842.6	2421.9
712	645.4	594.5	706.2
614	995.1	643.1	1966.4
617	687.3	609.7	594.2
637	580.6	613.2	627.9
611	549.3	582.7	2392.8
2009	536.1	689	1227.6
553	605.7	1866.5	610.7
638	577.6	1874.4	2111.2
2056	955.1	641.3	2885.7
560	2726.9	1949.5	589
2057	580.1	611.5	576.3
2038	2767.2	585.6	730.7
607	967	599.2	593.4
718	550.7	602.7	736.9
2209	646.7	596.8	833.1
585	586.2	672.2	2857.3
604	622.6	641.3	550.3
617	582.7	628.5	594.7
1879	682	700.6	585
2027	897.7	621.4	1989.4
536	615.3	645.4	605.7
612	828.3	626.1	588.1
640	931.9	594.5	2032.7
561	809.6	608.5	680.9
601	2791.5	1948	2308.7
580	624	665.2	577.1
574	894.3	576.2	596.4
1876	599.7	552	660.5
628	646.3	1083.6	601.7
590	571.1	580.3	596.2
783	610	588	590.6
641	631.8	1836.2	603.9
556	743.2	609.1	568.2
615	2554.8	595.6	594.5
1884	764.3	606.8	546.2
650	1132.4	606.8	564.7
598	2541.7	1952.4	555.3
586	624.5	2051.9	598.2
469	2210	609.7	655.6
591	2168.6	1992.2	558.4
634	2453.2	1945	905.9
798	2870.3	1923.8	597.6
639	2157.7	1770.2	2529.1
662.3	2111.4	552.6	570.7
539.2	626.1	680.3	3131.3
758.1	2453.9	1916.2	611
2387.6	2439.8	654.7	584.8
597.5	976.5	641.9	622.2
696.5	1165	677.4	685.2
684.9	763.6	2517	565.5
632.6	2778	699.4	545.1
604.8	2874.7	1955.4	569.2
601.2	618.7	1348.5	523.8
551.5	2796.1	700.6	552.5
615.6	672.5	895.9	534.5
679.7	567.8	2161.9	593.9
660.5	660.6	2616.7	1998.5
552.1	610.7	564.4	923.6
678	763.3	2645.7	561.7
600	2427.3	701.1	554.5
2389	588.3	598.6	559.7
538.8	614.5	2080.9	567.8
3085.7	751	691.9	2504.9
591.1	952	1886.9	549
544.3	625.2	710.4	1965.2
684.4	485.3	1760	618.4
2075.4	1688.1	1059.5	580.9
668.1	490.5	1768.5	628.7
565.6	523.9	1948	566.7
630.8	585.9	599.2	621.3
561.4	628.8	2110.6	569.8
2389	472.5	1765.1	621.2
2560.8	471.4	610.9	2101.2
695.9	469	1922.3	579.7
2044.9	487.3	1953.9	567.9
2714.3	465.1	1931.4	612.7
764.4	914.5	980.6	583.6
3257.5	2068.7	616.2	565.2
649.5	2012.8	609.1	2462.9
2466.5	569	1908.5	574.8
599	554.6	637.8	860.1
2927.8	2593.1	1932.9	596.4
649.5	621.1	617.9	832.6
640.7	480.2	2134.5	584
2721.4	562.5	684.9	552.6
604.4	590.5	2046.3	565.2
2118.6	2138.2	608.5	574.9
2909.4	554.8	2086.3	953.2
553.5	463.6	975.6	561.2
737.5	614.6	2658.6	2521
586.8	633.1	2832.8	619.5
614.1	620	607.4	585.4
551.8	571.9	2051.9	617.5
2060.2	538.5	1024.1	615.8
549.7	637.6	643.6	554
2089	623.3	802.7	564.2
600.7	2166.3	1950.9	575.8
621.4	472.9	2182.5	552.2
540	471.6	2076.8	2018.2
591.7	475.1	619.7	979.5
744.9	610.1	627.9	588.3
2124	478.7	1931.4	561.2
548.6	581.6	2083.6	2019.6
2089	548	2151.6	575.5
620.3	642.2	1949.5	565.4
2099.9	575.1	2056.1	630.7
693.6	658.4	1770.2	2567.3
580.4	579.7	1853.8	600.6
606.8	549.6	609.7	583.9
2894.7	2087.4	653.6	562.8
617.3	2593.6	944.5	629.6
556.4	2464.8	945.1	655.9
673.3	545.4	2610	1946.3
556	739.9	726.5	620.1
634.3	608.3	617.9	575.4
553.5	600.7	629	579
575	550	644.2	663.6
555.5	585.1	569.7	582.4
560.7	576.6	633.7	584.7
664.1	1932.6	615.6	584.1
602.7	584.9	652.4	968.1
633.7	1985.5	964	569.4
719.6	589.2	2054.7	2013.8
755.3	619.4	633.1	560.5
599.2	584.2	643.6	624.9
584.5	747	667.5	596.9
770.2	671.6	629.6	621.3
611.5	2109.8	996.7	564.4
808.4	579.7	639	597.8
723.1	1850.4	627.9	591.3
711.4	579.7	658.8	565.8
590	2327.3	651.8	595.6
681.5	2619.2	739.8	591.1
590.3	546.4	664	603.9
599.2	585.6	649.5	549.7
664.8	578.2	658.2	759.3
761.6	571.2	1877.5	582.6
665.5	2610.4	654.1	574.4
627.9	614.1	645.4	627.8
579.3	541.1	683.2	582.7
728.3	554.2	657	578.6
2068.5	585.9	594.5	1055.5
1968.6	2105.7	2696.6	576.7
918.9	2304.9	656.5	2428.4
655.3	800.3	612.7	586.7
2472.8	584.7	600.9	547.3
676.8	2056.2	645.4	575.2
617.9	576.7	579.2	573.3
543.8	637.8	573.3	564.8
651.8	640.7	715.6	589.9
723.7	614.9	560.9	601.9
593.5	581.6	649.5	573.2
812.9	609.8	862.7	634.1
667.6	691.9	1952.4	595.4
632.8	550.4	631.4	581.4
762.7	733.7	605.6	572.2
1990.7	651.7	1934.4	572.2
2082.9	751	676.2	548.1
664.6	595.6	586.2	561.2
602.7	611.6	686.7	588.7
688.4	605.8	598	586.1
618.5	896	958.4	595.2
782.6	608.8	648.3	680.3
544.2	2081.1	641.9	2463.8
595	785.5	900.4	594.8
1855.4	616.1	1956.9	600.9
682.6	2169	704	570.6
614.4	650.6	704.6	582.7
714.4	608.8	2006.6	556
744.9	2073.5	1929.9	599.5
614.4	635.2	629.6	572
767.3	1633.1	821.4	579.2
672.2	2630.8	1589.4	600
893.7	635.8	555.5	555.2
585	2081.8	593.3	606.5
888.1	2060.1	1811.8	589.5
2381.2	805	624.9	596.1
753.5	1164.5	702.9	2021
625.1	2083.6	588.6	595.7
595.6	2553.2	934.5	575.8
1778.6	686.6	609.1	701.7
688.4	1109.1	1931.4	607.6
742.1	826.2	918.3	656.5
649.6	703.8	919.4	564.6
610.3	2062.4	600.3	613.6
751.8	1922.8	660.5	2146.3
1837.3	570.3	1926.9	904.3
717.3	591.4	652.4	967.9
2501.9	2052.7	578	599.2
645.4	2022.5	2089	677.4
574.2	2558.9	680.3	954
2146.3	2792.2	623.8	568.5
639	896.8	922.2	951.8
639.6	997.8	617.3	2640.1
682	588.5	648.3	989.5
622.6	1996.8	2232.6	2683.1
687.3	693.7	1970.2	2651.2
684.6	637.6	1942	2605.3
591.6	589.9	1940.5	644.8
664	1904.7	599.7	698.8
825.4	2667.3	1952.4	590.9
594.5	1960.5	625.5	991.7
824	690.4	2047.7	925.6
2129.3	2509.2	1943.5	668.7
694.2	723.6	1940.5	1086.2
646.9	2036.3	657.6	572.7
892.5	2130.2	681.5	2050.5
740.1	708.8	1967.3	622.6
702.3	1920.6	582.7	993.9
763.3	2000.4	1945	2767.2
946.2	1948.4	826	640.1
636.1	2986.2	673.3	624.4
682.6	2014.1	1946.5	694.8
583.3	927.4	555.5	970.1
612.1	594.4	664	957.9
593.3	643.6	2721.4	620.9
737.5	1869	619.7	796.4
600.5	2740.6	1940.5	1959.9
651.9	2814.4	3219.7	2629.8
701.1	604.4	1958.4	997.2
	572.5	1932.9	553.8
	935.3	637.8	639.6
	955.1	651.8	576.8
	610.3	944	1403.3
	646.6	1953.9	495.5
	2417.4	669.3	995
	1842.6	1946.5	593.9
	2582.3	596.8	601.5
	606.8	2695.7	551.4
	987.8	2439	1096.8
	2193.9	1903.9	684.9
	1227.8	2121.3	628.5
	903.2	598.6	645.4
	617.3	2093.1	2630.8
	2036.5	2576.4	619.1
	2894.7	2173.5	829.9
	983.4	2097.2	2659.5
	657.6	668.7	1980.5
	627.3	679.1	907.7
	1810.1	634.9	668.1
	653.6	1953.9	1230.2
	1135.8	2226.4	853.1
	981.7	2003.7	662.9
	1940.5	589.7	752.4
	694.2	1992.2	490.7
	2566.7	593.9	2053.3
	1923.8	1953.9	608
	2531.1	661.1	569.7
	1048.7	661.1	1974.6
	845.2	1962.8	1776.9
	697.7	583.9	584.5
	676.2	2445.4	704.6
	634.3	1946.5	665.8
	1043.3	593.3	2590
	1992.2	1965.8	734
	610.9	2546	1000
	2616.7	2000.8	563.8
	787.9	702.3	600.3
	1054.1	608.5	1974.6
	822.6	2515.9	615
	822.6	2149	2684
	967.3	1965.8	740.9
	602.1	2657.6	706.3
	1059.5	2155.5	812.3
	1078.3	2065.8	668.7
	1291.7	2075.4	827.1
	663.4	636.6	2624.2
	1040.6	2169.7	585
	512.2	2608.2	585.6
	2043.5	644.8	1826.4
	610.3	2161.9	867.2
	1850.6	1882.2	740.9
	928.4	1683.4	1018.6
	996.7	2172.2	2584.2
	804.4	603.9	2029.4
	2610	3537.5	583.3
	689.6	2039.3	755.3
	1032.4	3372.2	2107.9
	555.5	1968.7	505.1
	1780.3	551.4	738.6
	740.9	2150.3	856
	2614.8	615.6	670.4
	666.9	2035.1	1040.6
	1072.9	2730.1	1996.5
	1026.9	1934.4	1857
	2569.6	1926.9	716.7
	1007.5	662.9	807.2
	1059.5	1929.9	1861.7
	652.4	615	985
	2091.8	1493.1	697.1
	993.5	621.4	643.6
	1914.7	656.5	666.9
	778.2	2067.1	976.2
	2602.4	642.5	971.8
	629	728.8	599.2
	787.3	935.6	652.4
	2620.4	2618.6	987.8
	1970.2	907.7	987.8
	1088.9	590.9	1015.8
	2105.3	569.7	620.9
	1007.5	784.4	637.2
	619.7	599.7	682
	685.5	657	802.7
	609.7	680.3	653.6
	2663.1	582.1	603.3
	2544	981.2	1013
	684.4	566.8	1043.3
	1869.6	577.4	1043.3
	978.4	611.5	665.8
	2598.6	653	675.7
	988.4	987.3	965.1
	1026.9	612.1	546.7
	866.1	633.1	1021.3
	1091.5	630.8	1015.8
	1013	638.4	1917.7
	672.2	632	589.7
	2675	626.1	578
	1032.4	884.1	1091.5
	2061.6	660.5	2601.5
	1037.8	654.1	2382.3
	939	657.6	1468.6
	844.1	1796.9	1928.4
	664	570.9	588.6
	754.7	644.8	1064.9
	1849	627.3	2887
	2642	610.3	916.6
	646	607.4	1096.8
	1046	752.4	2050.5
	979.4	626.7	2023.7
	703.5	713.3	538.4
	845.2	2086.3	2075.4
	683.8	2186.3	950.7
	609.7	1808.5	762.7
	644.2	590.3	959.6
	1001.9	926.1	2605.3
	971.2	615.6	2642.9
	1018.6	643.1	1086.2
	993.5	1493.1	743.8
	1934.4	595.6	668.1
	2656.7	637.2	1086.2
	1010.3	671	1834.5
	651.8	1866.5	1940.5
	1094.2	655.9	1070.3
	859.3	1893.1	995
	845.8	810.6	773
	2651.2	628.5	1925.3
	673.3	933.4	2637.3
	994.5	646	1040.6
	996.3	629.6	560.9
	624.9	657.6	800.4
	934.5	616.2	2534.1
	1024.1	644.2	866.1
	973.4	675.1	2616.7
	882.4	661.7	595.6
	989.5	2612.9	805
	669.3	672.2	1067.6
	1018.6	578	632.6
	1037.8	777.6	1018.6
	2211.5	1861.7	2191.4
	687.3	642.5	642.5
	814.6	684.4	1223
	1832.9	565	683.8
	570.3	598	2474.8
	591.5	708.7	1939
	660.5	616.2	622
	553.8	577.4	1370.7
	639	645.4	2601.5
	2544	589.2	1013
	932.3	617.9	1001.9
	590.9	1770.2	1094.2
	2099.9	630.2	982.3
	598.6	702.9	1096.8
	696.5	969.5	2608.2
	612.1	772.4	2531.1
	1785.3	920.6	770.7
	2379	630.8	959.6
	684.9	676.2	1010.3
	644.2	580.9	843
	2568.7	614.4	576.2
	2590	784.4	1062.2
	2606.2	899.3	1171.2
	573.8	1193.6	1120.3
	525.9	1770.2	804.4
	1135.8	571.5	1203.5
	613.2	2167.1	802.1
	596.8	593.9	966.8
	1070.3	2642.9	1059.5
	590.9	2601.5	766.7
	505.7	1903.9	644.8
	602.7	2076.8	987.3
	976.8	2640.1	716.7
	783.3	672.7	1054.1
	904.3	637.8	770.7
	569.1	2082.2	702.9
	1078.3	643.6	996.3
	1051.4	702.9	990.7
	3381.6	1908.5	697.1
	589.2	608	2611.9
	668.1	734	600.3
	1839.4	676.2	721.3
	671	800.4	1015.8
	515.2	2192.6	1013
	551.4	1943.5	2603.4
	921.1	572.1	1056.8
	619.7	2036.5	2671.3
	553.2	786.2	820.9
	620.9	1748.1	1010.3
	562.6	699.4	1004.7
	1690.5	661.1	1992.2
	591.5	661.1	619.1
	2186.3	643.6	2071.3
	517	996.3	2659.5
	566.2	658.8	608.5
	962.9	675.1	1004.7
	557.3	596.8	1040.6
	679.1	608	859.3
	943.4	947.9	973.7
	1032.4	2075.4	590.3
	603.9	713.3	731.7
	1070.3	2091.8	1346.3
	850.9	1032.4	1847.4
	1232.6	721.3	1928.4
	966.8	1760	1032.4
	605.6	622	671.6
	576.8	607.4	694.2
	1064.9	603.9	615.6
	959	645.4	1800.2
	2484.2	812.3	617.3
	2584.2	632	671
	802.1	639.6	996.3
	645.4	804.4	578.6
	641.9	807.8	716.7
	954.6	934	709.8
	1018.6	629.6	796.4
	597.4	565	647.1
	659.4	633.7	956.5
	749	801	2053.3
	626.1	1357.4	1007.5
	626.7	653.6	2626.1
	2010.9	623.8	938.4
	931.2	982.2	1001.9
	656.5	644.8	683.8
	667.5	660.5	695.9
	610.3	615	669.3
	1007.5	612.1	670.4
	1018.6	646.6	2158.1
	639.6	624.4	664
	1813.4	610.9	970.8
	1899.3	619.7	760.4
	687.3	685.5	705.2
	1968.7	638.4	993.5
	971.8	543.1	629
	2621.4	1148.5	2682.2
	669.8	605.6	618.5
	1725.7	2781.5	606.2
	955.1	641.3	1882.2
	971.8	1130.6	603.9
	667.5	940.1	981.7
	647.7	595.6	2002.3
	615	963.4	616.2
	522.9	698.8	2609.1
	597.4	2146.3	823.1
	841.3	980.1	973.4
	675.1	623.8	2585.2
	794.7	2719.6	837.9
	654.1	627.9	1945
	1043.3	2053.3	1926.9
	666.4	2149	1857
	702.9	947.3	2016.6
	1086.2	725.4	695.4
	660.5	651.8	786.7
	641.9	702.3	985.1
	992.2	613.2	603.3
	631.4	2219	1922.3
	603.3	627.3	608
	672.2	2251	1948
	687.3	2462.3	2020.9
	982.2	2141.1	975.1
	624.4	650.6	632.6
	636.1	1746.4	1945
	628.5	1879.1	2685.8
	612.1	675.1	2006.6
	658.2	650.1	1968.7
	990.6	853.1	799.3
	647.7	637.2	606.8
	784.4	978.4	613.8
	949	1864.9	1015.8
	683.2	724.2	669.8
	1010.3	1980.5	828.8
	616.8	2086.3	2063
	687.3	626.1	910.5
	982.2	608.5	962.3
	752.4	608.5	657.6
	643.6	991.7	797
	659.4	630.2	588
	965.1	2075.4	1858.6
	673.3	852.6	1858.6
	2259.5	668.7	1818.3
	612.1	1919.3	743.8
	2527	713.9	959.6
	654.1	632	945.1
	1971.7	614.4	996.7
	607.4	697.7	1072.9
	582.7	701.1	964.6
	622	2142.4	640.7
	940.6	1942	1004.7
	982.8	575.6	954.6
	496.1	1917.7	1013
	503.3	702.3	658.8
	480	2093.1	926.1
	730	668.7	954.6
	505.1	1004.7	1026.9
	592.1	2068.5	843
	2130.6	583.9	673.9
	603.9	2078.1	2026.6
	608	2064.4	611.5
	979	1940.5	971.2
	567.9	1917.7	990
	1091.5	2026.6	759.9
	2859.3	1905.5	507.5
	502.1	566.8	1928.4
	630.2	2797.4	2601.5
	613.8	660.5	2480
	638.4	607.4	985
	653.6	1926.9	1075.6
	2030.8	1925.3	760.4
	684.9	650.6	740.3
	497.3	1879.1	1004.7
	505.1	739.8	985
	1161.2	2139.8	657
	2620.4	668.7	704
	651.2	2155.5	972.9
	2471.7	630.2	937.3
	1902.4	1950.9	992.2
	499.1	1273	982.2
	1007.5	1746.4	2690.3
	2110.6	2067.1	1037.8
	620.9	1046	627.9
	650.1	2196.4	2744
	546.7	1037.8	987.8
	630.2	999.1	1741.3
	582.1	801	1059.5
	720.8	2694.8	983.4
	616.8	1922.3	962.2
	1737.8	1943.5	639
	673.9	775.3	708.7
	660	750.1	967.9
	624.9	658.8	640.7
	1001.9	1775.2	665.8
	622.6	2113.3	613.8
	506.3	659.4	788.4
	599.2	583.9	633.1
	893.7	2795.8	999.1
	665.2	2458.1	768.4
	505.1	603.3	2671.3
	544.3	671.6	1018.6
	982.2	639.6	987.8
	647.1	654.1	987.8
	584.5	879.6	594.5
	574.4	1952.4	703.5
	911	630.2	985
	685.5	2074	1010.3
	1928.4	715.6	1749.8
	616.8	612.7	675.7
	1982	2142.4	1849
	973.7	1874.4	662.9
	595.6	1237.5	659.4
	614.4	3052	645.4
	648.9	2013.8	977.9
	783.3	1024.1	944
	511.6	549	997.2
	932.3	2086.3	832.2
	605	678.6	615
	883	1926.9	2057.5
	651.2	2490.4	1146
	1674.5	2090.4	595.6
	811.2	1841	1847.4
	732.3	612.7	1135.8
	615.6	631.4	1864.9
	689.6	680.3	1980.5
	1010.3	705.8	2216.5
	613.2	637.8	938.9
	654.7	620.3	807.9
	527.7	1953.9	1000
	769.6	571.5	549.9
	647.7	653	688.4
	512.2	574.4	522.9
	492.5	624.4	635.9
	599.7	2071.3	1072.9
	630.2	588	622.7
	623.2	607.4	1094.2
	853.1	634.3	988
	605	617.3	685.5
	654.7	2176.1	2692.1
	691.9	645.4	645.8
	658.8	580.3	2573.5
	673.9	616.8	2393.4
	993.5	985	987
	657	595.6	675.8
	773	596.8	1143.4
	496.1	643.6	606.3
	608	656.5	750.2
	597.4	962.9	694.7
	925	2071.3	2019.5
	634.9	661.7	1091.5
	601.5	674.5	1062.2
	682	720.2	664.7
	667.5	600.9	681.4
	501.5	869.5	1048.7
	505.7	1816.7	1948
	687.8	777.6	1497.2
	2163.2	672.7	2067.1
	684.9	1956.9	973
	870.1	740.3	1083.6
	647.7	669.8	2090.4
	499.7	661.1	1928.4
	705.8	618.5	1824.8
	702.9	622	2339.4
	699.4	708.1	642.9
	650.1	770.7	2003.7
	531.8	1823.2	1086.2
	540.1	3416.9	1035.1
	609.1	625.5	709.1
	672.2	757	2499.6
	570.3	623.2	2259.5
	638.4	810.1	764.8
	950.1	561.4	1992.2
	600.9	766.2	2697.5
	780.4	2094.5	2534.1
	543.7	2809	2026.6
	823.7	3358.3	2122.6
	627.3	650.6	1080.9
	503.9	844.7	1115.1
	2616.7	2042.1	2532.1
	1990.7	613.8	811.8
	507.5	631.4	711.4
	2500.7	760.4	748
	598	1926.9	1024.1
	702.9	639.6	1056.8
	679.1	781	958.2
	1875.9	694.2	761.1
	1083.6	824.8	2512.9
	991.7	627.3	911.3
	1099.4	2063	1925.3
	2449.6	2719.6	985.7
	2596.7	629	701.1
	639.6	2270.3	2536.1
	631.4	619.1	1986.3
	524.1	711	1883.8
	1801.9	2015.2	990.7
	838.4	2026.6	974.4
	1062.2	806.7	921.1
	879.1	2670.4	1911.6
	686.1	1218.1	919
	985.6	680.9	1443.7
	838.4	744.4	1032.4
	831.1	2002.3	806
	2572.6	2003.7	2018.1
	578.6	715	968.5
	656.5	633.7	747.8
	894.2	612.7	2594.8
	979.5	809.5	1860.2
	860.5	726	604
	916.1	2083.6	2173.5
	597.4	2118.6	974.5
	2042.1	651.8	1732.6
	3230.8	1388.2	745.2
	1875.9	2002.3	1070.3
	655.9	1955.4	1916.2
	729.4	588.6	695.6
	960.1	2072.6	1819.9
	1310.1	720.8	634.8
	612.7	1263.6	577.9
	1032.4	625.5	566.4
	1896.2	571.5	641
	835.6	1968.7	548
	2612.9	671.6	576
	717.9	2230.1	562.5
	579.7	2003.7	1781.8
	2647.5	652.4	784.6
	1001.9	1153.6	762.1
	1990.7	573.8	595.3
	999.4	588.6	569.7
	2181.2	649.5	571.8
	952.9	646	1962.8
	661.7	1950.9	570.7
	529.5	691.9	578
	686.7	755.8	990
	1026.9	644.2	2450.8
	1974.6	789.6	1750
	1891.6	583.9	2478.5
	2063	1046	582.8
	608.5	639	588.2
	634.3	664	923.1
	644.2	912.2	1670.3
	753.5	883.6	684.6
	985	2949.6	2624
	1051.4	634.9	526.6
	1983.4	595	602.2
	590.9	2051.9	937.6
	624.4	1048.7	712.8
	922.8	834.5	700
	822	1911.6	573.3
	2655.8	614.4	609
	942.3	2158.1	613.4
	849.7	1001.9	684.8
	1051.4	2694.8	602.1
	982.2	633.1	685.6
	1051.4	982.3	609.4
	1072.9	608	578.4
	1029.6	992.2	588
	1024.1	803.3	580.6
	965.1	599.2	706.2
	1001.9	939	576.3
	985	682.6	606.7
	721.3	1894.7	795.5
	645.4	633.1	1689.1
	962.2	1970.2	588.9
	985	730	614.4
	630.2	2819.7	582.3
	1004.7	727.7	1913.9
	712.7	2201.5	637.6
	646.6	2185	571.7
	1015.8	719	664.4
	853.7	683.8	594.7
	768.4	708.7	1765.1
	696.5	585	1163.7
	709.8	2177.4	556
	676.8	660	2608.3
	1004.7	570.9	2885.1
	761.6	2063	2541.6
	2665.9	836.2	621.6
	613.2	675.7	1668.9
	682	2195.2	705.3
	748.4	636.1	2043.5
	679.1	2885.4	645.5
	1067.6	661.7	576.8
	1001.9	633.7	1872.6
	956.5	973.7	628.6
	886.9	596.8	1946.6
	823.1	2677.7	667.4
	763.9	840.7	2549.7
	1026.9	1937.4	635.2
	2636.4	2053.3	976.2
	1078.3	2110.6	589.3
	1929.9	1056.8	511.8
	835.6	1940.5	481.7
	1010.3	1970.2	969.3
	713.9	722.5	939.2
	947.8	654.1	579.2
	661.1	2200.2	1793.9
	1942	713.3	1032.9
	689.6	2619.5	611.3
	1018.6	686.7	1031
	1007.5	608.5	853.5
	671.6	616.2	728
	537.8	1872.8	642.7
	608.5	3277.2	1006.4
	972.9	2705.5	687.6
	593.9	2855.3	656.6
	588	628.5	1026.6
	785.6	996.7	688.7
	2042.1	638.4	965.7
	673.3	1989.2	662.5
	2609.1	642.5	2086.9
	1161.2	670.4	597.4
	721.3	2046.3	584.5
	620.3	844.7	589.2
	635.5	606.8	1191.5
	609.1	631.4	638.4
	635.5	565.6	850.3
	614.4	552.6	708.1
	955.7	606.2	774.7
	654.7	634.3	965.1
	625.5	679.7	628.5
	805.5	653.6	655.9
	2252.2	1980.5	643.6
	1070.3	570.3	622.6
	635.5	689	644.2
	1368.5	2242.4	570.3
	2602.4	1051.4	683.2
	818	2000.8	600.9
	597.4	597.4	1086.8
	2267.9	2015.2	758.1
	1997.9	840.1	2075.4
	684.4	651.8	556.1
	1048.7	2006.6	633.7
	921.1	811.8	1187.7
	1054.1	2171	849.2
	2120	611.5	686.7
	1070.3	2595.7	587.4
	644.8	645.4	821.4
	2401.1	2215.3	571.5
	1894.7	1928.4	710.4
	649.5	924.5	637.2
	2110.6	668.7	605.6
	2600.5	2020.9	1082
	2653	1552.8	667.5
	1046	2112	960.7
	1013	689.6	718.5
	1032.4	619.1	784.4
	1950.9	676.8	2353.7
	1135.8	676.8	2334.3
	715.6	621.4	3337.4
	636.6	586.2	679.7
	962.3	2093.1	2678.3
	629.6	1948	630.8
	920	953.4	731.1
	923.9	1995.1	701.7
	1046	2426.1	620.3
	962.3	635.5	689.6
	3427.6	595.6	590.3
	663.4	963.4	1887.5
	1866.5	586.8	640.7
	650.1	982.2	744.9
	646.6	1932.9	656.5
	629.6	648.9	649.5
	2003.7	599.2	669.8
	676.8	943.4	788.4
	985	578	592.1
	664.6	663.4	2673
	676.2	641.9	627.9
	684.4	655.3	1069.7
	677.4	646.6	597.4
	1997.9	505.7	714.4
	612.1	516.4	668.1
	689.6	586.2	582.7
	970.8	511	2084.3
	975.6	516.4	599.7
	648.3	506.3	810.1
	990.7	1962.8	996.7
	620.3	497.3	569.7
	1059.5	580.9	633.7
	1032.4	646.6	2083.9
	671	529.5	804.4
	682.6	636.1	660.5
	693.6	610.9	1973.8
	788.4	765.6	2130.6
	993.5	627.9	1973.3
	1839.4	648.9	2080
	976.5	1781.9	746.1
	626.1	712.7	623.2
	707.5	595.6	603.3
	634.9	619.7	588.6
	608.5	711	856.5
	1024.1	727.7	680.9
	2640.1	506.9	681.5
	972.9	611.5	694.8
	605.6	498.5	690.1
	651.8	749	1887.8
	651.8	900.4	687.3
	1004.7	612.7	646
	606.8	540.1	693.6
	960.1	518.8	728.8
	1029.6	569.1	625.5
	662.9	705.2	759.9
	663.4	2809	801
	617.9	701.1	658.8
	708.7	1929.9	647.1
	654.1	2204	660.5
	990.7	1844.2	679.7
	750.7	638.4	667.5
	610.3	610.9	707.5
	926.7	1943.5	622
	618.5	735.7	652.4
	921.1	716.7	652.4
	599.2	673.9	1140.5
	592.7	519.4	622.6
	751.8	530.6	649.5
	679.1	638.4	820.9
	694.2	582.7	633.7
	656.5	502.1	1802.1
	675.7	1487	1928.6
	732.9	810.1	723.1
	663.4	715	726
	708.7	708.7	635.5
	991.1	1939	849.7
	700	2058.8	694.2
	944.9	542.5	1070.8
	596.8	615	1048.9
	627.3	550.2	578
	782.7	824.3	1935.1
	814.6	2164.5	1019.2
	1992.2	536.6	1953.4
	1858.6	577.4	620.3
	505.7	631.4	767.3
	582.7	1923.8	799.8
	654.1	1748.1	738.6
	618.5	1589.4	2698.3
	864.4	624.4	883
	671	731.1	1965.5
	769.6	628.5	1398.4
	616.8	511	1025
	528.9	695.9	1112.4
	533	805	2652.9
	577.4	1546.9	657
	1472.7	508.6	2135.5
	761	509.2	2581.4
	708.7	566.2	2639.5
	533	621.4	728.8
	531.8	650.1	1176
	1021.3	650.1	1031
	984.5	1483	2916.9
	642.5	2105.3	855.4
	883	514.6	631.4
	537.2	683.2	1053
	510.4	3262.3	1057.4
	615.6	1407.6	708.7
	2494.5	515.8	1061.6
	2127.9	656.5	684.4
	647.1	537.8	704
	931.2	2238.7	952.7
	724.8	576.2	2998.5
	481.2	580.3	1959.7
	822	599.2	1027.4
	539	1845.8	829.4
	590.3	2138.5	1066.9
	737.5	590.9	1898.3
	653.6	553.2	2582.9
	593.3	518.2	978.4
	1980.5	1026.9	1986.5
	679.1	511	2397.9
	676.2	573.3	1959.3
	643.6	666.4	806.7
	841.8	547.8	682.6
	639	1874.4	1102.2
	591.5	1922.3	2488.8
	857.1	1029.6	1572.1
	506.3	616.8	791.3
	598	719	622.6
	588.6	625.5	669.3
	603.3	678	736.9
	552.6	616.2	1173.6
	612.1	687.3	1083.6
	1091.5	504.5	1162.7
	1995.1	700.6	2113.1
	1821.6	603.9	669.8
	2645.7	595	1082.3
	2056.1	690.7	936.2
	559.7	1992.2	640.7
	2672.3	678	667.5
	739.2	624.9	680.9
	1943.5	604.4	2137.4
	577.4	664.6	2069.3
	637.8	512.2	668.1
	486.6	599.2	627.9
	502.1	543.1	636.1
	494.9	696.5	753.5
	907.7	694.8	1029.4
	605.6	2056.1	852.6
	480	634.3	612.7
	666.4	1746.4	659.4
	753	2046.3	2462
	2821.4	596.8	1046.4
	579.2	1511.3	975.6
	541.3	565	724.8
	606.8	1958.4	683.8
	600.3	1958.4	2620.2
	2548	2719.6	2480.5
	632.6	1816.7	736.3
	1829.7	679.7	586.8
	541.9	556.1	2632.4
	1765.1	2211.5	1288.2
	2552.9	556.1	3543.1
	695.9	1928.4	961.2
	509.2	3514.7	1209.5
	532.4	564.4	789.6
	543.7	2535.1	726
	658.2	726.5	698.8
	2146.3	726.5	739.8
	659.4	2173.5	624.4
	610.9	619.1	1078.8
	679.1	1886.9	1018.1
	627.3	938.4	906.6
	552	2613.8	724.2
	484.2	1855.4	1833.4
	533.6	2731.9	1171
	488.4	616.8	2453.2
	572.7	2076.8	684.9
	658.8	2177.4	568.5
	509.8	673.3	2065.2
	595.6	610.3	2237.4
	680.9	642.5	3126.5
	522.3	2071.3	1539
	736.3	687.3	1003.4
	600.9	1868.1	1123.7
	522.9	2079.5	727.1
	579.2	2061.6	1341.7
	576.2	2693.9	649.5
	590.9	537.2	656.5
	489.6	674.5	1267.1
	536	2019.5	704.6
	599.7	672.2	1027.9
	2402.2	624.4	614.4
	643.6	2179.9	651.8
	597.4	3367.2	575.6
	571.5	696.5	962.9
	688.4	1999.4	999.6
	606.2	653	1072.9
	2030.8	593.9	721.9
	512.8	1670.9	1061.5
	2087.7	2211.5	691.9
	1897.8	3170.1	2114.8
	581.5	2883.8	620.9
	2072.6	613.8	739.2
	574.4	3286	1883.5
	689	2823.8	988.1
	664	2802.4	643.6
	2156.8	2098.5	757.6
	661.1	553.8	1057.9
	491.9	2403.3	902.6
	582.7	613.2	1431.9
	726	2717.9	768.4
	2097.2	1968.7	731.7
	557.3	617.3	942.3
	1678	1914.7	1039
	634.9	2090.4	819.7
	559.1	2467.5	3347
	2033.7	2532.1	2053.1
	2533.1	541.9	1172.4
	500.9	643.1	661.7
	604.4	1923.8	666.9
	1893.1	1897.8	586.2
	1931.4	668.7	641.9
	578.6	1871.2	1349.9
	639	2620.4	1141.4
	746.7	591.5	988.9
	655.3	1920.8	831.1
	609.1	1894.7	1120.2
	585.6	660	605.6
	582.7	2002.3	1084.3
	587.4	2199	580.9
	650.6	2124	655.3
	798.1	1907	836.2
	671	622	682.6
	609.1	1907	623.2
	596.2	2717	1201.4
	597.4	576.8	579.2
	637.8	609.7	1131.2
	570.3	1550.8	1989.2
	613.8	632	948.4
	783.3	1834.5	1135.6
	608	2107.9	1624.9
	655.9	563.2	2632.8
	735.7	625.5	911
	777	2961.5	1082.2
	676.8	586.2	1021.9
	680.3	560.3	1122.7
	790.1	2165.8	1130.7
	609.1	2078.1	1008.5
	1893.1	2506.8	691.9
	671	2804.9	669.8
	654.7	694.8	734
	773.6	719	1990.7
	1059.5	624.4	741.5
	947.3	667.5	811.2
	586.2	569.7	985.5
	1112.5	2709	743.8
	583.9	614.4	929.5
	707.5	2142.4	757.6
	657	1900.8	1028.9
	789.6	1953.9	1017.5
	715.6	1929.9	893.1
	604.4	605	995.6
	991.7	630.8	1133.5
	742.1	2169.7	695.9
	797.6	638.4	1003.2
	812.9	620.9	494.3
	562.6	720.2	1101.5
	2060.2	1864.9	1836.8
	731.7	693.6	1015.3
	582.7	2054.7	1250.7
	935.1	2190.1	991.7
	804.4	582.7	2223.2
	604.4	2026.6	1028.6
	788.4	2802.4	902.1
	721.9	588	2661.4
	2506.8	662.3	1101.1
	586.2	603.9	1027
	799.8	644.8	997.1
	803.8	1917.7	832.2
	1166.2	2624.2	1070.5
	577.4	650.1	1983.7
	1125.5	2202.7	706.9
	668.7	2819.7	685.5
	712.7	624.9	622.1
	745.5	636.6	599.8
	1046	2044.9	599.2
	614.4	2032.2	968.6
	785	612.1	619.8
	753.5	573.8	850.9
	751.3	664.6	578.4
	802.7	717.9	769.8
	627.9	1903.9	621
	1040.6	647.1	591.1
	987.3	590.9	814.3
	781	657.6	577.2
	1980.5	620.3	744.4
	937.9	617.9	613
	1128	608	616.4
	827.1	578.6	790.3
	616.8	661.1	671.2
	678.6	703.5	654.6
	659.4	2003.7	549
	647.7	1992.2	1126.7
	650.6	2904	630
	650.6	2183.8	666.2
	570.3	624.9	567.7
	604.4	612.7	575.7
	637.8	1996.5	900.8
	722.5	1792	599.7
	673.9	1926.9	603.5
	2544	673.3	2509.6
	616.8	2182.5	938.3
	1914.7	2604.3	765.8
	2235.1	665.8	605.1
	1717	614.4	602.4
	815.2	2147.6	914.6
	631.4	1372.9	562.9
	715.6	646.6	658.6
	1708.2	1905.5	598.2
	584.5	1932.9	564.7
	682	1863.3	587.4
	3351	609.7	635.8
	806.7	2240	667.7
	647.1	1920.8	582.7
	787.9	676.2	733.9
	824.8	2558.9	765
	2581.3	1694.1	1963.6
	633.7	657.6	935.7
	1940.5	801.5	679.8
	913.3	814.6	706.3
	729.4	655.9	626.7
	1956.9	2036.5	2422.1
	711.5	629.6	740.7
	2660.4	1899.3	2583.7
	864.4	585.6	614.4
	696.5	714.4	760.9
	2013.8	1897.8	623.8
	845.2	1949.5	2010.6
	682.6	618.5	2513.4
	2069.9	2547	611.4
	1976.1	1872.8	605.9
	647.1	1956.9	704.8
	2047.7	2743.2	553.2
	643.1	644.8	2160.6
	606.8	2010.9	559.9
	1688.8	2439	732.8
	795.8	1874.4	590.4
	634.9	649.5	1041.7
	627.3	1880.6	718.1
	2671.3	653.6	761.2
	749.5	1911.6	665.4
	632	1910.1	994.1
	591.5	1844.2	561.3
	582.1	630.2	962.5
	656.5	777	675.2
	770.7	1926.9	2380.2
	725.4	589.2	2730.6
	690.7	585.6	598.7
	634.9	781.6	985.7
	754.7	2097.2	2010.5
	711	646	701
	911.6	1875.9	658.6
	656.5	1824.8	689.5
	2556.9	1858.6	713.7
	562	615.6	631.5
	1980.5	718.5	661.6
	755.3	2063	557.7
	2149	765	581.5
	642.5	1650.9	2044.8
	553.2	2019.5	612.4
	681.5	2032.2	803.4
	759.3	665.8	750.6
	640.1	1922.3	589.5
	1932.9	760.4	2543.5
	797	596.8	776.9
	632	678	683.5
	580.3	2126.6	739.2
	667.5	1913.2	1062.4
	701.7	1869.6	2597.5
	2701.9	1913.2	1999.5
	717.3	634.3	735.8
	653.6	1914.7	560.7
	797.6	1861.7	655.5
	675.1	2039.3	621.4
	3249.6	628.5	607.9
	791.3	610.9	597.6
	629	585.6	821.7
	661.1	646.6	837.2
	744.9	2192.6	679.6
	712.1	633.7	934.4
	678.6	992.2	950.9
	577.4	2569.6	664.1
	1931.4	605.6	561.3
	3471.1	583.9	587.5
	899.8	2135.8	670
	773.6	1863.3	982.5
	603.9	3135.7	638.1
	643.1	600.3	664.5
	715	556.1	751.5
	549.6	2064.4	665.6
	593.9	627.3	635.8
	758.7	2158.1	1954.2
	749	613.2	2016.1
	913.8	2076.8	2081.6
	561.4	632	891.1
	1135.8	1993.6	828.4
	675.7	650.1	709.4
	686.1	2856.1	578.1
	686.1	629.6	1050.6
	833.3	2137.2	2567.7
	2142.4	620.9	660.4
	683.8	562	631.8
	1051.4	1902.4	943.8
	819.2	1911.6	955.4
	1035.1	709.2	599.3
	781.6	2450.7	620.1
	2566.7	571.5	879.4
	560.9	700	648.8
	630.2	693.6	748.2
	728.8	726	603.1
	2698.4	2089	623.3
	692.5	834.5	556.1
	765	582.1	656
	1956.9	644.2	642.6
	2012.3	554.9	601.1
	2168.4	556.1	835.2
	696.5	1897.8	620.6
	2151.6	623.2	609.7
	711	931.2	693.2
	666.4	2051.9	739.4
	677.4	620.9	922.2
	712.7	992.8	737.2
	707.5	638.4	579.2
	1249.4	758.1	999.7
	673.9	628.5	602.6
	571.5	659.4	667.2
	686.1	550.8	588.5
	2514.9	600.3	814.6
	591.5	1922.3	983.9
	1931.4	1964.3	710.1
	665.2	2212.8	709.7
	651.2	2067.1	934.7
	629	2133.2	691.9
	3266.4	3208.5	1006.9
	2263.1	639.6	697
	754.7	627.9	791.5
	661.7	2035.1	643.2
	2933.1	658.8	600.7
	2563.8	1956.9	786.9
	2756.9	639.6	610.8
	2018.1	2539.1	602.9
	2608.2	602.7	1090.2
	819.2	2106.6	1091
	991.7	848.6	1977.2
	780.4	2171	568.8
	715	680.9	885.8
	591.5	694.8	623.9
	626.1	647.1	607
	946.2	640.7	883.4
	1075.6	687.8	771.4
	585.6	587.4	1971.7
	918.9	650.1	593.1
	921.7	819.2	605.3
	2173.5	2666.8	615
	603.3	1863.3	672.2
	735.2	2437.9	588.7
	757	655.9	623.9
	1062.2	3067.9	609.8
	1021.3	2783.2	650.8
	655.3	2113.3	911.6
	617.9	665.2	646.1
	789.6	2248.5	682.7
	648.3	2237.5	764.8
	1024.1	3342	940.9
	755.3	624.4	597.1
	608	2186.3	742.4
	623.2	614.4	795.8
	651.8	1905.5	589.4
	630.8	1982	779.8
	744.4	752.4	1008.7
	606.2	680.3	640.7
	715	3179	672.8
	570.9	2122.6	622
	595.6	643.1	619.4
	628.5	849.7	635.8
	640.7	667.5	801.6
	930	2711.7	787.6
	593.9	2690.3	557
	744.4	2859.3	550.8
	734.6	676.8	606.2
	664.6	628.5	778.5
	602.7	697.7	578.8
	742.6	687.8	740.5
	576.8	647.1	857.2
	669.8	1874.4	921.4
	669.8	644.8	576.4
	648.3	630.8	706.7
	585.6	672.7	755
	639	1925.3	588.8
	606.8	2701.9	576.4
	647.7	616.2	2021.9
	734	2063	621
	608	2158.1	534
	606.8	573.8	555
	688.4	741.5	598.8
	589.2	1908.5	2725.5
	573.8	2261.9	580.9
	789	1860.2	1991.5
	589.2	610.9	635.1
	589.7	2410.9	590.1
	618.5	646.6	2546.6
	664.6	2192.6	632.5
	653.6	654.7	566.1
	590.9	2057.5	653.6
	648.9	2072.6	1983.5
	993.5	1798.6	2597.9
	707.5	2201.5	2573.2
	700.6	659.4	570.9
	663.4	2304.7	2792.9
	641.9	653	2051.1
	613.2	2193.9	2000.1
	605.6	2670.4	2113.8
	815.2	704	592.1
	608.5	1907	575
	570.3	575.6	565.5
	696.5	2047.7	2449
	2598.6	2507.8	567
	692.5	670.4	2676.7
	2628	634.9	604.7
	477.6	987.8	2434.1
	311.5	2028	1992.8
	793	997.2	568.2
	786.7	610.3	2086.6
	340.3	1907	2949.3
	998.9	2029.4	2647.2
	307.2	558.5	2723.4
	466.2	2133.2	577.1
	567.4	1888.4	2034.1
	835.6	2374.5	1964.4
	578	905.4	525.2
	309	655.3	2660.1
	453.6	655.3	587.3
	630.8	1888.4	2000.9
	665.8	1161.2	2121.9
	995.6	644.8	2010.9
	496.1	1942	598.4
	605.6	687.8	2017.6
	456.6	2040.7	597.6
	889.7	616.8	2565.2
	536.6	1949.5	599.6
	825.4	2069.9	2036.7
	920	2820.6	2422.2
	623.8	2160.6	2491.7
	444	2756.1	577.9
	586.8	2057.5	1958.6
	617.3	1021.3	1986.4
	643.6	660.5	2011.9
	509.8	2015.2	2023
	614.4	572.7	2014.2
	585.6	743.2	2193
	549.6	637.2	1992
	962.3	1983.4	1949.1
	647.7	659.4	721.4
	487.2	702.3	2719.9
	555.5	685.5	602.2
	369.5	704	2540.2
	633.7	1776.9	2642.9
	655.3	658.2	2498.2
	627.3	2056.1	2978.2
	474.6	2028	2089.8
	516.4	2163.2	2672.7
	572.1	2165.8	1962.1
	657.6	704	2616.3
	595	2040.7	2070.3
	556.7	971.2	2436.3
	581.5	2628.9	2618.7
	682.6	1929.9	1939
	540.1	615.6	563.5
	370.1	2003.7	2015.2
	617.3	1890	2027.5
	629	676.2	2280.8
	674.5	610.3	2398.3
	679.7	1770.2	1970.2
	579.2	675.7	2105
	569.1	2002.3	2704.4
	610.9	556.1	2051.6
	563.2	661.7	2021.1
	582.7	653	2062.5
	617.9	3151.4	1983.1
	686.7	671	2013.5
	608.5	2050.5	2332.6
	606.2	2074	2636
	474	596.8	595.5
	640.7	623.8	2107.8
	487.8	612.1	1976.2
	497.9	890.9	2989.5
	697.1	1914.7	616.5
	649.5	914.4	553.4
	602.7	2704.6	2220.6
	597.4	610.9	561.8
	378.1	2445.4	2023.2
	588.6	1787	1991.7
	683.8	1091.5	2922
	506.3	637.8	586.3
	622	566.2	2498.9
	576.2	554.4	1983.8
	789	1913.2	2608.9
	915.5	2600.5	2007.3
	1054.1	588	2063.9
	594.5	588	2474.5
	710.4	695.9	2223.6
	450.6	629.6	1989.4
	425.9	543.1	630.3
	633.7	644.8	1986.7
	747.2	2161.9	2630.8
	667.5	611.5	566
	961.8	622.6	2009.7
	352.5	1952.4	656.8
	541.3	2133.2	610.1
	598.6	565	1981.3
	639.6	676.8	2015.5
	1024.1	598	559.1
	787.9	569.7	2008.3
	608.5	2161.9	1992
	375.6	1062.2	1987.4
	589.2	2049.1	2904.8
	362.2	2700.1	557.3
	525.9	567.4	673.1
	445.2	644.8	2028.1
	534.2	692.5	1968.1
	550.2	662.3	1974.6
	362.8	2717.9	2358.6
	586.8	742.1	556.9
	560.9	642.5	2395.3
	562.6	546.7	2452.4
	609.7	3033.1	1999.9
	345.1	693.6	2448.6
	362.8	720.2	1993.8
	554.9	1888.4	2003.4
	363.5	612.1	610.6
	360.4	644.2	607.7
	620.9	592.1	2048.2
	365.9	1926.9	2430.1
	570.3	3146.8	2981.9
	339.6	2905.6	1987.2
	728.3	1832.9	2015
	348.8	704	1988.6
	671.6	826	543.6
	425.9	543.1	2714.2
	657.6	3281.9	2689
	647.1	2138.5	2110.4
	668.1	2037.9	2070.8
	558.5	2065.8	551.6
	347.6	637.2	3178.3
	3450.8	1035.1	558.2
	2403.3	551.4	647.2
	836.2	1203.5	616.9
	606.2	2040.7	603.3
	927.3	616.8	684
	2003.7	696.5	612.1
	618.5	1931.4	628.1
	2107.9	585	546.3
	2611	690.1	568.2
	676.2	624.9	2732.5
	619.7	624.9	2002.4
	604.4	639	670.9
	689	2000.8	2871.4
	1987.8	1955.4	2447.2
	1054.1	2057.5	2663.8
	696.5	724.8	773.5
	708.7	615.6	566.6
	550.8	561.4	1234.3
	791.9	700	615.5
	898.2	676.2	627.5
	1976.1	620.9	571
	633.1	1815	2006.7
	585	585	526.9
	1035.1	1964.3	666.6
	827.1	585.6	2004.7
	656.5	1935.9	2714.3
	1062.2	835.6	613.4
	2227.7	567.4	589
	764.4	2191.4	557.1
	966.2	651.2	2989.4
	596.2	2046.3	616.1
	664	644.8	565.8
	1007.5	1239.9	576.7
	1007.5	620.3	621.7
	643.6	2093.1	686.2
	679.1	624.9	566
	647.7	2196.4	595.7
	806.1	650.1	550.9
	670.4	643.1	2684.9
	772.4	1922.3	611.3
	610.9	689	618.9
	629	3029.6	646.1
	777.6	703.5	604.4
	975.1	1942	622.7
	996.3	1903.9	618.3
	610.9	599.2	624.3
	939	726.5	633.4
	2006.6	1897.8	2496.8
	629	1920.8	2577.5
	907.7	672.7	717
	708.7	2008	2167.5
	653	697.7	614.6
	592.1	2529.1	1982.8
	615.6	664	651.2
	631.4	720.2	618.9
	769	1943.5	665
	983.4	2047.7	682.8
	548.4	618.5	947.6
	613.2	651.8	2468.2
	765	1880.6	718
	2397.8	1899.3	675.5
	946.8	2120	927.2
	1910.1	634.3	604
	808.9	590.3	634.5
	1332.8	2010.9	688.7
	651.2	2661.3	933.8
	594.5	2127.9	701.2
	628.5	632	621.6
	1210.8	599.7	747.2
	653	2818.1	812.5
	612.7	566.2	613.2
	501.5	691.3	612.3
	770.7	2199	974.2
	2442.2	2807.4	653.2
	2086.3	634.3	896.9
	521.7	598	652.6
	682.6	653.6	784.3
	692.5	993.5	829.6
	631.4	2139.8	655.6
	836.2	2171	788.1
	691.3	1910.1	622.2
	853.1	681.5	785.2
	655.3	2152.9	856
	814.1	657	667.9
	726	623.8	649.5
	601.5	1000	756.1
	814.6	2145	703.6
	510.4	644.2	650
	880.2	586.2	936.5
	880.2	2156.8	622.3
	583.9	727.7	610.5
	496.7	670.4	694.1
	580.9	637.2	849.5
	493.1	634.3	728.8
	672.2	660.5	958.5
	486.6	3348.2	614.8
	741.5	686.7	911.5
	694.2	2078.1	606.9
	500.9	622	2979.9
	788.4	620.3	1921.5
	728.8	649.5	622.4
	659.4	2707.3	957.6
	779.3	611.5	658.6
	589.2	636.1	1095
	742.1	615	617.8
	669.8	659.4	2082.9
	633.7	672.7	996.2
	617.3	619.7	853.9
	669.3	727.7	743.4
	612.7	2068.5	620.1
	1088.9	687.3	631.6
	1946.5	2463.3	606.1
	317.6	1690.5	662.1
	331.1	2506.8	591.8
	604.4	654.7	816.1
	323.1	762.7	623.4
	319.4	669.3	614.6
	317	679.7	623.5
	328	660	687.5
	812.3	2057.5	2701.6
	331.1	668.1	624.2
	326.8	3030.3	604.9
	323.1	2577.4	673.5
	1997.9	1903.9	622.6
	649.5	1054.1	811.3
	335.4	738	983.8
	633.1	668.7	630.5
	588	631.4	664.8
	654.1	2094.5	697.8
	555.5	2876	615.6
	586.8	1996.5	769.9
	588.6	2107.9	972.9
	520	633.7	692.2
	815.8	685.5	732
	985.4	634.3	635.1
	806.7	722.5	627.9
	958.4	2714.3	2155.5
	2612.9	1109.9	625.4
	603.9	2172.2	865.2
	1984.9	621.4	630.9
	970.7	1953.9	2226.3
	2643.8	704	607
	605	3074.8	750.1
	617.9	2080.9	1986.9
	2733.6	2257	2293.6
	1107.3	2043.5	616.3
	857.7	634.9	617.5
	653	1600.8	662.7
	932.3	2775.6	687
	1908.5	751.3	617.1
	974	1788.6	2027.9
	2625.2	2500.7	605.6
	896.5	583.9	626.2
	918.3	2018.1	982.5
	917.2	2029.4	811.3
	1796.9	2029.4	2595.1
	2620.4	566.2	604.3
	1993.6	2098.5	2111
	2641	683.8	637.3
	990.6	738.6	651.9
	680.9	1263.6	909.3
	1080.9	607.4	961.1
	2671.3	2851.3	732.6
	1051.4	2833.6	809.8
	603.9	2036.5	725.5
	989.5	2662.2	608.8
	1112.5	2249.7	621.4
	660.5	645.4	684.6
	2733.6	2743.2	682.5
	2181.2	1923.8	610.6
	1896.2	2824.6	2010.6
	672.2	2090.4	714.7
	1907	2072.6	1997.2
	2435.8	596.8	605.2
	579.2	2067.1	683.7
	627.3	2876	767.1
	1967.3	787.3	603.6
	850.3	2022.3	659.7
	499.7	2775.6	966.3
	912.7	3521.7	630.2
	941.8	1943.5	846.5
	707.5	742.6	608.8
	586.2	2188.8	676.1
	1987.8	1961.4	608.4
	986.2	642.5	644.8
	2611	2702.8	2449.3
	2690.3	562	648.9
	2074	2074	641.8
	2086.3	2476.9	621.4
	780.4	2053.3	839.1
	2186.3	582.1	622
	693.6	1937.4	606
	2006.6	615.6	609.9
	930.6	2696.6	1005.8
	715.6	1001.9	632.7
	2117.3	608.5	606.5
	1905.5	669.8	617.1
	1937.4	637.8	666.1
	1891.6	732.3	628.7
	961.8	1920.8	604.6
	912.2	2708.1	765.8
	829.9	2861.7	853.2
	790.7	716.2	631.9
	976.5	2145	695.8
	671	2960.8	901.9
	617.9	689.6	617.8
	592.1	573.3	651.8
	683.8	2629.8	897.5
	979	2491.4	700.4
	537.2	1638.1	1021.7
	1863.3	2988	1006.3
	892.5	2192.6	617.8
	526.5	2826.3	658.8
	587.4	1896.2	665.9
	524.7	2129.3	629.8
	523.5	2178.6	744.3
	548.4	2777.3	629.8
	531.8	2970.4	605.8
	532.4	2126.6	647.5
	544.3	629	1848.8
	2605.3	618.5	677.5
	536	673.3	1051.6
	550.2	611.5	2699.5
	544.3	3113.3	761.7
	2774.8	714.4	698.5
	524.7	797.6	992.1
	1916.2	715.6	862.5
	2002.3	2076.8	645.7
	544.9	3307.6	769.1
	555.5	622	1014.8
	1801.9	641.3	1015.4
	904.3	628.5	988.8
	527.1	2033.7	618
	521.7	704.6	688
	558.5	631.4	2412.2
	570.3	736.9	634.5
	542.5	676.8	616.2
	543.7	2044.9	809.3
	556.1	915	626
	926.1	643.6	764.4
	617.8	2086.3	661.5
	864.4	2135.8	2146.6
	612.3	613.2	2669.4
	629	671.6	669.6
	672.3	646.6	1022.5
	665	636.1	618.9
	854.9	2445.4	628.5
	697.4	625.5	660
	706.3	590.3	694.3
	1836	565.6	819.4
	633.2	1235.1	637.3
	564.8	660.5	920.1
	829.5	619.7	2648.4
	710.4	879.6	2727.6
	642.4	780.4	987.8
	566.5	512.8	1103.2
	2098	567.9	822
	620.3	1062.2	707.7
	559.7	1861.7	617.9
	648.7	514.6	1918.4
	925.2	976.8	938
	589.7	666.9	707.5
	574.6	613.2	974.6
	732.9	613.8	630.1
	704.3	679.1	605.6
	744.4	672.7	939.6
	918.6	546.7	2624.2
	1922.8	732.9	619
	870	543.1	626.1
	589.4	629	634.2
	595.5	557.9	593.3
	692.3	657	974.1
	614.1	660.5	749.1
	683.2	619.1	608.5
	2660.1	633.1	616.2
	575.4	2129.3	929.2
	562	612.7	988.3
	633.9	654.7	1861.8
	567.5	725.4	2538.5
	580.3	987.3	937.5
	730.7	715.6	2721.6
	639.7	2619.5	932
	2488	515.8	905.1
	600.3	2019.5	2512.9
	2668.3	617.9	649.8
	566.6	1844.2	604.7
	840.2	597.4	679.6
	570.8	687.8	613.7
	597.3	802.1	614.8
	829	671.6	592.5
	2507.5	580.3	606.5
	882.7	1908.5	633.5
	1498	637.2	637
	565.5	651.2	616.3
	831.7	2167.1	2373.8
	560.9	1896.2	831.6
	640.3	706.3	940.1
	561.9	693	900.8
	685.8	2597.7	826.6
	844.5	798.1	654.7
	1001.9	659.4	805.4
	621.1	659.4	812.6
	825.6	863.3	2399
	2467	1959.9	743
	627.3	1741.3	596
	2063	653	681
	2009.8	653	1876
	675	818	686.7
	634.6	508	3442.4
	614.8	625.5	616.6
	636.4	646.6	601.5
	2047.4	688.4	627.4
	619.7	590.3	1127.7
	923.9	520	792.2
	596.2	579.7	1086.8
	1237.7	630.2	627.6
	650.6	699.4	766.4
	696.5	1955.4	801.8
	1214.8	569.7	1142.8
	762.1	1823.2	601.8
	737.5	738	631.2
	1158.7	701.7	1059.2
	916.6	2462.3	1062.1
	686.1	2207.8	603.4
	572.1	560.3	733.6
	675.7	2040.7	612.5
	992.2	759.9	612.7
	2153.3	696.5	777.7
	546.7	619.7	612.6
	1211.2	744.4	603.5
	2937	990	907.1
	1311.7	2773.9	987.1
	2775.4	1437.4	799.7
	827.1	1059.5	973.7
	658.2	1995.1	666.5
	736.9	640.1	690.5
	1124.4	828.2	611.1
	1212.9	1891.6	608.1
	916.6	697.7	652.8
	904.3	1059.5	2168.2
	868.9	712.7	602.4
	1072.4	1117.7	655.5
	856.5	660.5	626.7
	2518.6	660.5	1070
	1060.4	2002.3	637.4
	1073.8	2701.9	2284.1
	1046.6	512.8	629.6
	2075.9	505.1	1133.2
	595.6	2207.8	616.9
	605	1926.9	793.9
	1093.6	2129.3	2185
	1325.4	960.7	621.9
	1084.5	655.3	664.8
	1873.1	2168.4	613.7
	1090.1	2091.8	614.2
	1039.8	665.8	2079.9
	708.1	670.4	967.5
	1991.8	747.8	1047.1
	1132	822	2619.2
	1047.9	664	687.6
	2622.5	762.7	806.6
	1051.3	949.5	656.4
	724.2	513.4	943.4
	1025	2333.7	663.6
	923.9	509.8	599
	1088.1	2410.9	667.7
	2035.3	583.9	602
	2625.3	829.4	637.7
	599.7	689.6	634.8
	705.8	732.3	2816.7
	1080.6	1015.8	617.5
	1345.6	1875.9	1950.5
	2656	2018.1	727.4
	2055.1	720.8	611.7
	1066.5	530.1	989.9
	1056.9	2060.2	730.7
	748.4	1916.2	1009.7
	2609.2	626.1	634.1
	1008.3	1107.3	878.5
	777.6	660.5	692.1
	1526.4	723.7	1021.7
	1263.6	662.3	622.3
	643.1	1965.8	1022.6
	2389	950.7	766.3
	687.8	694.8	665.5
	1071.3	691.9	674.9
	1041.4	631.4	917.1
	2652.9	735.2	2454
	2109.7	675.7	631.2
	1021.7	633.1	918.9
	996	747.8	1972.5
	1909.8	2584.2	731.7
	1309	697.7	602.8
	1929.8	661.7	764.5
	677.4	733.4	951.6
	676.8	1874.4	894.9
	1948.8	595	723.5
	2610.2	1737.8	627.4
	1003.2	668.1	683.6
	2636	583.3	623.1
	1971.2	653.6	649.1
	2153.6	646.6	819.7
	1029	622.6	1356.7
	694.8	818.6	2330.7
	549	602.7	640.7
	2704.8	1902.4	611.1
	563.8	2210.3	665.6
	2639.7	683.2	855
	521.7	664	626.3
	783.9	2522	661.2
	2172.7	2067.1	904.5
	1107.8	662.9	1023.5
	1311.1	643.6	662.8
	1124.8	670.4	986.5
	2677	568.5	684.8
	898.7	2061.6	729.8
	967.9	795.3	661.7
	708.7	752.4	1051.9
	913.8	518.8	965.8
	935.6	2054.7	2629.3
	1123.1	2864.1	847.2
	1091.1	1062.2	632
	1161.2	2082.2	713.8
	790.7	646	778.5
	715.6	569.1	666.3
	2036.6	1877.5	632.7
	1978.1	644.8	988
	1098.2	892.5	613.3
	807.8	655.9	661.9
	1161.1	562	860.8
	2554.1	687.8	632.1
	954.6	647.1	619.5
	1954.4	811.8	1849.2
	1058.1	811.8	1172.4
	1865.2	2043.5	1003.4
	1107	2152.9	728
	2093.2	706.9	781.4
	1090.8	653.6	744.1
	1950.3	1962.8	623.1
	1341.6	2176.1	591
	1006.4	1937.4	605.4
	1964.1	1920.8	987.2
	1050.4	2721.4	638.1
	1615.4	1880.6	630.2
	771.3	736.3	991.6
	2042.1	602.7	986.8
	1117.2	525.9	600.4
	855.4	653	575.3
	2139.1	567.4	2519.4
	2029	660.5	622.1
	1055.5	633.1	830.7
	1937.9	2187.6	2922.5
	1057.1	3112.6	646
	1994.5	2604.3	571.8
	799.3	1940.5	589.1
[truncated: 948 more rows]

## Sheet: OMZ
SAMPLE	GRAIN	Age_238U	Err_238U	Age_235U	Err_235U	Age_206Pb	Err_206Pb	ORIGINAL REF	REFERENCE	SELECTED	1S	CONC%	TO ISOPLOT-R	AGE	1S	CONC%
														OM-200	Tournaisian-Viséan
OM-200	OM-200-Seq1-a11	385	5	384	9	378	54	Pereira et al., 2012	Puetz et al., 2018	385	2.5	101.852		353	2.5	91.9271
OM-200	OM-200-Seq1-a13	380	5	377	8	360	45	Pereira et al., 2012	Puetz et al., 2018	380	2.5	105.556		383	3	92.5121
OM-200	OM-200-Seq1-a14	365	3	363	5	352	34	Pereira et al., 2012	Puetz et al., 2018	365	1.5	103.693		385	3.5	92.9952
OM-200	OM-200-Seq1-a15	362	4	365	6	380	39	Pereira et al., 2012	Puetz et al., 2018	362	2	95.2632		388	3	93.2692
OM-200	OM-200-Seq1-a16	383	5	386	10	403	61	Pereira et al., 2012	Puetz et al., 2018	383	2.5	95.0372		389	2.5	93.2854
OM-200	OM-200-Seq1-a2	353	5	353	7	352	45	Pereira et al., 2012	Puetz et al., 2018	353	2.5	100.284		371	2	93.9241
OM-200	OM-200-Seq1-a20	366	6	365	7	357	38	Pereira et al., 2012	Puetz et al., 2018	366	3	102.521		383	3.5	94.335
OM-200	OM-200-Seq1-a21	376	5	379	7	398	40	Pereira et al., 2012	Puetz et al., 2018	376	2.5	94.4724		376	2.5	94.4724
OM-200	OM-200-Seq1-a25	375	9	375	11	374	61	Pereira et al., 2012	Puetz et al., 2018	375	4.5	100.267		383	2.5	95.0372
OM-200	OM-200-Seq1-a27	385	7	389	19	414	124	Pereira et al., 2012	Puetz et al., 2018	385	3.5	92.9952		361	4	95.2507
OM-200	OM-200-Seq1-a28	372	5	370	22	361	154	Pereira et al., 2012	Puetz et al., 2018	372	2.5	103.047		362	2	95.2632
OM-200	OM-200-Seq1-a29	402	3	400	7	391	44	Pereira et al., 2012	Puetz et al., 2018	402	1.5	102.813		387	2.5	95.3202
OM-200	OM-200-Seq1-a3	353	5	357	7	384	46	Pereira et al., 2012	Puetz et al., 2018	353	2.5	91.9271		381	4.5	96.2121
OM-200	OM-200-Seq1-a30	373	6	374	12	383	78	Pereira et al., 2012	Puetz et al., 2018	373	3	97.389		388	2.5	96.5174
OM-200	OM-200-Seq1-a33	365	4	362	6	338	31	Pereira et al., 2012	Puetz et al., 2018	365	2	107.988		362	2	97.0509
OM-200	OM-200-Seq1-a37	391	7	388	16	373	105	Pereira et al., 2012	Puetz et al., 2018	391	3.5	104.826		373	3	97.389
OM-200	OM-200-Seq1-a38	379	4	374	5	346	29	Pereira et al., 2012	Puetz et al., 2018	379	2	109.538		369	3	98.4
OM-200	OM-200-Seq1-a39	377	5	375	7	368	38	Pereira et al., 2012	Puetz et al., 2018	377	2.5	102.446		370	2.5	98.4043
OM-200	OM-200-Seq1-a4	370	5	371	6	376	35	Pereira et al., 2012	Puetz et al., 2018	370	2.5	98.4043		394	2.5	99.7468
OM-200	OM-200-Seq1-a41	379	4	379	7	379	40	Pereira et al., 2012	Puetz et al., 2018	379	2	100		379	2	100
OM-200	OM-200-Seq1-a42	388	5	390	14	402	89	Pereira et al., 2012	Puetz et al., 2018	388	2.5	96.5174		375	4.5	100.267
OM-200	OM-200-Seq1-a43	391	4	390	16	384	107	Pereira et al., 2012	Puetz et al., 2018	391	2	101.823		353	2.5	100.284
OM-200	OM-200-Seq1-a44	389	5	393	6	417	32	Pereira et al., 2012	Puetz et al., 2018	389	2.5	93.2854		355	3	100.567
OM-200	OM-200-Seq1-a47	383	7	381	16	366	105	Pereira et al., 2012	Puetz et al., 2018	383	3.5	104.645		375	2.5	100.806
OM-200	OM-200-Seq1-a48	387	5	390	8	406	46	Pereira et al., 2012	Puetz et al., 2018	387	2.5	95.3202		370	2	101.648
OM-200	OM-200-Seq1-a49	381	9	383	10	396	48	Pereira et al., 2012	Puetz et al., 2018	381	4.5	96.2121		359	2	101.7
OM-200	OM-200-Seq1-a5	360	6	359	7	350	34	Pereira et al., 2012	Puetz et al., 2018	360	3	102.857		391	2	101.823
OM-200	OM-200-Seq1-a50	355	6	355	13	353	90	Pereira et al., 2012	Puetz et al., 2018	355	3	100.567		385	2.5	101.852
OM-200	OM-200-Seq1-a51	383	6	387	12	414	76	Pereira et al., 2012	Puetz et al., 2018	383	3	92.5121		377	2.5	102.446
OM-200	OM-200-Seq1-a53	386	5	381	10	353	64	Pereira et al., 2012	Puetz et al., 2018	386	2.5	109.348		366	3	102.521
OM-200	OM-200-Seq1-a54	399	5	397	21	382	142	Pereira et al., 2012	Puetz et al., 2018	399	2.5	104.45		402	1.5	102.813
OM-200	OM-200-Seq1-a55	350	5	347	6	328	39	Pereira et al., 2012	Puetz et al., 2018	350	2.5	106.707		360	3	102.857
OM-200	OM-200-Seq1-a57	361	8	363	11	379	63	Pereira et al., 2012	Puetz et al., 2018	361	4	95.2507		372	2.5	103.047
OM-200	OM-200-Seq1-a6	370	4	369	9	364	58	Pereira et al., 2012	Puetz et al., 2018	370	2	101.648		365	1.5	103.693
OM-200	OM-200-Seq1-a7	359	4	358	6	353	38	Pereira et al., 2012	Puetz et al., 2018	359	2	101.7		399	2.5	104.45
OM-200	OM-200-Seq1-a9	371	4	375	6	395	36	Pereira et al., 2012	Puetz et al., 2018	371	2	93.9241		383	3.5	104.645
OM-200	OM-200-Seq2-a10	362	4	363	7	373	45	Pereira et al., 2012	Puetz et al., 2018	362	2	97.0509		391	3.5	104.826
OM-200	OM-200-Seq2-a2	383	7	386	9	406	43	Pereira et al., 2012	Puetz et al., 2018	383	3.5	94.335		391	3	104.826
OM-200	OM-200-Seq2-a3	369	6	370	9	375	51	Pereira et al., 2012	Puetz et al., 2018	369	3	98.4		380	2.5	105.556
OM-200	OM-200-Seq2-a4	388	6	392	11	416	71	Pereira et al., 2012	Puetz et al., 2018	388	3	93.2692		350	2.5	106.707
OM-200	OM-200-Seq2-a5	358	4	354	9	331	57	Pereira et al., 2012	Puetz et al., 2018	358	2	108.157		365	2	107.988
OM-200	OM-200-Seq2-a6	391	6	389	19	373	125	Pereira et al., 2012	Puetz et al., 2018	391	3	104.826		358	2	108.157
OM-200	OM-200-Seq2-a7	375	5	375	8	372	49	Pereira et al., 2012	Puetz et al., 2018	375	2.5	100.806		386	2.5	109.348
OM-200	OM-200-Seq2-a9	394	5	394	13	395	82	Pereira et al., 2012	Puetz et al., 2018	394	2.5	99.7468		379	2	109.538
														ZD6	Ediacaran
ZD6	ZD6-Z01	493	8	509	8	582	32	Fernández-Suarez et al., 2002	Puetz et al., 2018	493	4	84.7079		2098	68	80.7436
ZD6	ZD6-Z02	518	16	527	14	568	44	Fernández-Suarez et al., 2002	Puetz et al., 2018	518	8	91.1972		1958	16	81.8693
ZD6	ZD6-Z03	519	16	535	10	602	48	Fernández-Suarez et al., 2002	Puetz et al., 2018	519	8	86.2126		519	6	82.1203
ZD6	ZD6-Z04	519	12	541	14	632	60	Fernández-Suarez et al., 2002	Puetz et al., 2018	519	6	82.1203		546	8	82.4773
ZD6	ZD6-Z05	529	12	543	12	598	40	Fernández-Suarez et al., 2002	Puetz et al., 2018	529	6	88.4615		2138	48	83.2554
ZD6	ZD6-Z06	540	12	544	12	564	44	Fernández-Suarez et al., 2002	Puetz et al., 2018	540	6	95.7447		722	8	83.3718
ZD6	ZD6-Z07	541	10	543	14	550	40	Fernández-Suarez et al., 2002	Puetz et al., 2018	541	5	98.3636		549	9	83.945
ZD6	ZD6-Z08	546	16	569	14	662	40	Fernández-Suarez et al., 2002	Puetz et al., 2018	546	8	82.4773		1868	14	84.4218
ZD6	ZD6-Z09	549	18	570	16	654	32	Fernández-Suarez et al., 2002	Puetz et al., 2018	549	9	83.945		493	4	84.7079
ZD6	ZD6-Z10	554	16	572	16	642	60	Fernández-Suarez et al., 2002	Puetz et al., 2018	554	8	86.2928		2034	8	84.8083
ZD6	ZD6-Z11	554	10	563	8	600	40	Fernández-Suarez et al., 2002	Puetz et al., 2018	554	5	92.3333		519	8	86.2126
ZD6	ZD6-Z12	571	18	571	16	568	56	Fernández-Suarez et al., 2002	Puetz et al., 2018	571	9	100.528		554	8	86.2928
ZD6	ZD6-Z13	572	18	571	18	562	44	Fernández-Suarez et al., 2002	Puetz et al., 2018	572	9	101.779		1964	22	86.7617
ZD6	ZD6-Z14	591	24	591	18	588	84	Fernández-Suarez et al., 2002	Puetz et al., 2018	591	12	100.51		749	8	87.093
ZD6	ZD6-Z15	597	16	597	14	592	40	Fernández-Suarez et al., 2002	Puetz et al., 2018	597	8	100.845		1882	12	87.5133
ZD6	ZD6-Z16	609	28	607	22	600	64	Fernández-Suarez et al., 2002	Puetz et al., 2018	609	14	101.5		1874	12	87.8335
ZD6	ZD6-Z17	629	14	648	16	714	44	Fernández-Suarez et al., 2002	Puetz et al., 2018	629	7	88.0952		629	7	88.0952
ZD6	ZD6-Z18	681	30	702	36	768	128	Fernández-Suarez et al., 2002	Puetz et al., 2018	681	15	88.6719		2004	10	88.3234
ZD6	ZD6-Z19	722	16	758	14	866	24	Fernández-Suarez et al., 2002	Puetz et al., 2018	722	8	83.3718		3304	16	88.3475
ZD6	ZD6-Z20	749	16	778	14	860	36	Fernández-Suarez et al., 2002	Puetz et al., 2018	749	8	87.093		529	6	88.4615
ZD6	ZD6-Z21	1577	68	1706	44	1868	28	Fernández-Suarez et al., 2002	Puetz et al., 2018	1868	14	84.4218		3034	6	88.497
ZD6	ZD6-Z22	1603	40	1763	30	1958	32	Fernández-Suarez et al., 2002	Puetz et al., 2018	1958	16	81.8693		681	15	88.6719
ZD6	ZD6-Z23	1646	50	1750	30	1874	24	Fernández-Suarez et al., 2002	Puetz et al., 2018	1874	12	87.8335		2672	8	90.9805
ZD6	ZD6-Z24	1647	38	1754	22	1882	24	Fernández-Suarez et al., 2002	Puetz et al., 2018	1882	12	87.5133		3040	6	91.1513
ZD6	ZD6-Z25	1694	56	1884	76	2098	136	Fernández-Suarez et al., 2002	Puetz et al., 2018	2098	68	80.7436		518	8	91.1972
ZD6	ZD6-Z26	1704	34	1825	22	1964	44	Fernández-Suarez et al., 2002	Puetz et al., 2018	1964	22	86.7617		2632	12	91.2234
ZD6	ZD6-Z27	1725	36	1870	22	2034	16	Fernández-Suarez et al., 2002	Puetz et al., 2018	2034	8	84.8083		1906	22	91.4481
ZD6	ZD6-Z28	1743	50	1819	34	1906	44	Fernández-Suarez et al., 2002	Puetz et al., 2018	1906	22	91.4481		554	5	92.3333
ZD6	ZD6-Z29	1770	54	1881	28	2004	20	Fernández-Suarez et al., 2002	Puetz et al., 2018	2004	10	88.3234		2364	10	92.5973
ZD6	ZD6-Z30	1780	42	1952	56	2138	96	Fernández-Suarez et al., 2002	Puetz et al., 2018	2138	48	83.2554		3292	16	94.5626
ZD6	ZD6-Z31	1859	42	1861	24	1862	20	Fernández-Suarez et al., 2002	Puetz et al., 2018	1862	10	99.8389		2110	16	94.8815
ZD6	ZD6-Z32	1927	134	1915	72	1902	20	Fernández-Suarez et al., 2002	Puetz et al., 2018	1902	10	101.314		540	6	95.7447
ZD6	ZD6-Z33	1929	76	1963	38	1998	28	Fernández-Suarez et al., 2002	Puetz et al., 2018	1998	14	96.5465		1998	14	96.5465
ZD6	ZD6-Z34	2002	64	2057	38	2110	32	Fernández-Suarez et al., 2002	Puetz et al., 2018	2110	16	94.8815		2136	16	97.8464
ZD6	ZD6-Z35	2090	40	2114	16	2136	32	Fernández-Suarez et al., 2002	Puetz et al., 2018	2136	16	97.8464		541	5	98.3636
ZD6	ZD6-Z36	2189	60	2281	30	2364	20	Fernández-Suarez et al., 2002	Puetz et al., 2018	2364	10	92.5973		1862	10	99.8389
ZD6	ZD6-Z37	2401	70	2529	40	2632	24	Fernández-Suarez et al., 2002	Puetz et al., 2018	2632	12	91.2234		591	12	100.51
ZD6	ZD6-Z38	2431	86	2566	42	2672	16	Fernández-Suarez et al., 2002	Puetz et al., 2018	2672	8	90.9805		571	9	100.528
ZD6	ZD6-Z39	2685	70	2890	30	3034	12	Fernández-Suarez et al., 2002	Puetz et al., 2018	3034	6	88.497		597	8	100.845
ZD6	ZD6-Z40	2771	48	2930	22	3040	12	Fernández-Suarez et al., 2002	Puetz et al., 2018	3040	6	91.1513		1902	10	101.314
ZD6	ZD6-Z41	2919	70	3153	26	3304	32	Fernández-Suarez et al., 2002	Puetz et al., 2018	3304	16	88.3475		609	14	101.5
ZD6	ZD6-Z42	3113	58	3223	26	3292	32	Fernández-Suarez et al., 2002	Puetz et al., 2018	3292	16	94.5626		572	9	101.779
														OGL 1	Early Cambrian
OGL 1	mr15d06	573.8	7.5	595.4	7.5	676.6	7.5	Linnemann et al., 2008	Stephan et al., 2018	573.8	3.75	84.8064		573.8	3.75	84.8064
OGL 1	mr15d08	580.3	11.5	576.8	11.5	562.4	11.5	Linnemann et al., 2008	Stephan et al., 2018	580.3	5.75	103.183		581.5	4.55	85.9444
OGL 1	mr15d09	2077.7	20.8	2108.5	20.8	2137.2	20.8	Linnemann et al., 2008	Stephan et al., 2018	2137.2	10.4	97.216		573.8	4.3	86.5721
OGL 1	mr15d11	747.8	8.6	763.8	8.6	808.6	8.6	Linnemann et al., 2008	Stephan et al., 2018	747.8	4.3	92.4808		1706.5	0	87.2136
OGL 1	mr15d12	651.2	11.2	657.9	11.2	680	11.2	Linnemann et al., 2008	Stephan et al., 2018	651.2	5.6	95.7647		614.4	3.65	87.7088
OGL 1	mr15d15	1746.6	34.7	1810.1	34.7	1882.2	34.7	Linnemann et al., 2008	Stephan et al., 2018	1882.2	17.35	92.7957		2595.7	0	87.853
OGL 1	mr15e06	1852.9	0	1974.5	0	2103.9	0	Linnemann et al., 2008	Stephan et al., 2018	2103.9	0	88.0698		2103.9	0	88.0698
OGL 1	mr15e07	614.4	7.3	633.1	7.3	700.5	7.3	Linnemann et al., 2008	Stephan et al., 2018	614.4	3.65	87.7088		592.7	4.6	89.4237
OGL 1	mr15e10	1994.5	11.9	2050.9	11.9	2106.6	11.9	Linnemann et al., 2008	Stephan et al., 2018	2106.6	5.95	94.6786		1911.6	0	89.5899
OGL 1	mr15e11	1935.1	22.3	2011	22.3	2089	22.3	Linnemann et al., 2008	Stephan et al., 2018	2089	11.15	92.6328		1864.9	14.5	90.1603
OGL 1	mr15e13	1761.8	19.3	1820.4	19.3	1886.9	19.3	Linnemann et al., 2008	Stephan et al., 2018	1886.9	9.65	93.3701		596.8	2.4	90.5202
OGL 1	mr15e14	573.8	8.6	592.5	8.6	662.8	8.6	Linnemann et al., 2008	Stephan et al., 2018	573.8	4.3	86.5721		2809.9	0	91.2097
OGL 1	mr15f05	596.8	4.8	610.4	4.8	659.3	4.8	Linnemann et al., 2008	Stephan et al., 2018	596.8	2.4	90.5202		779.9	8.45	91.5053
OGL 1	mr15f06	2280.4	0	2451.5	0	2595.7	0	Linnemann et al., 2008	Stephan et al., 2018	2595.7	0	87.853		747.8	4.3	92.4808
OGL 1	mr15f08	2043.5	31.1	2112.8	31.1	2179.9	31.1	Linnemann et al., 2008	Stephan et al., 2018	2179.9	15.55	93.7428		2089	11.15	92.6328
OGL 1	mr15f09	1818.5	19.5	1873.6	19.5	1934.4	19.5	Linnemann et al., 2008	Stephan et al., 2018	1934.4	9.75	94.0085		1882.2	17.35	92.7957
OGL 1	mr15f10	2086.1	17	2135.2	17	2181.2	17	Linnemann et al., 2008	Stephan et al., 2018	2181.2	8.5	95.64		567.4	3.9	93.0469
OGL 1	mr15f11	1712.6	0	1804.7	0	1911.6	0	Linnemann et al., 2008	Stephan et al., 2018	1911.6	0	89.5899		1886.9	9.65	93.3701
OGL 1	mr15f13	581.5	9.1	601.3	9.1	676.6	9.1	Linnemann et al., 2008	Stephan et al., 2018	581.5	4.55	85.9444		2179.9	15.55	93.7428
OGL 1	mr15f14	1720	26.4	1743.6	26.4	1770.2	26.4	Linnemann et al., 2008	Stephan et al., 2018	1770.2	13.2	97.1642		1934.4	9.75	94.0085
OGL 1	mr15f15	779.9	16.9	799.7	16.9	852.3	16.9	Linnemann et al., 2008	Stephan et al., 2018	779.9	8.45	91.5053		2028	12.3	94.497
OGL 1	mr15f16	593.3	5.2	597.8	5.2	613.4	5.2	Linnemann et al., 2008	Stephan et al., 2018	593.3	2.6	96.7232		2106.6	5.95	94.6786
OGL 1	mr15g05	592.7	9.2	607.9	9.2	662.8	9.2	Linnemann et al., 2008	Stephan et al., 2018	592.7	4.6	89.4237		2181.2	8.5	95.64
OGL 1	mr15g06	575.6	13.2	580.6	13.2	599	13.2	Linnemann et al., 2008	Stephan et al., 2018	575.6	6.6	96.0935		651.2	5.6	95.7647
OGL 1	mr15g07	923.3	6	929.9	6	944.9	6	Linnemann et al., 2008	Stephan et al., 2018	923.3	3	97.714		2026.6	6.7	95.8354
OGL 1	mr15g10	1942.2	13.4	1983.6	13.4	2026.6	13.4	Linnemann et al., 2008	Stephan et al., 2018	2026.6	6.7	95.8354		575.6	6.6	96.0935
OGL 1	mr15g12	1974.6	22.1	2004.8	22.1	2035.1	22.1	Linnemann et al., 2008	Stephan et al., 2018	2035.1	11.05	97.0272		622	5.05	96.3893
OGL 1	mr15g13	1488.3	0	1581.1	0	1706.5	0	Linnemann et al., 2008	Stephan et al., 2018	1706.5	0	87.2136		593.3	2.6	96.7232
OGL 1	mr15g15	620.9	7	615.2	7	591.7	7	Linnemann et al., 2008	Stephan et al., 2018	620.9	3.5	104.935		2035.1	11.05	97.0272
OGL 1	mr15g16	2030.8	21	2039.2	21	2046.3	21	Linnemann et al., 2008	Stephan et al., 2018	2046.3	10.5	99.2425		1770.2	13.2	97.1642
OGL 1	mr15h07	1681.4	29	1765.2	29	1864.9	29	Linnemann et al., 2008	Stephan et al., 2018	1864.9	14.5	90.1603		2137.2	10.4	97.216
OGL 1	mr15h09	622	10.1	627.2	10.1	645.3	10.1	Linnemann et al., 2008	Stephan et al., 2018	622	5.05	96.3893		923.3	3	97.714
OGL 1	mr15h11	2562.9	0	2703.9	0	2809.9	0	Linnemann et al., 2008	Stephan et al., 2018	2809.9	0	91.2097		609.1	4.55	98.7196
OGL 1	mr15h13	1916.4	24.6	1971.4	24.6	2028	24.6	Linnemann et al., 2008	Stephan et al., 2018	2028	12.3	94.497		2046.3	10.5	99.2425
OGL 1	mr15h14	567.4	7.8	576.4	7.8	609.8	7.8	Linnemann et al., 2008	Stephan et al., 2018	567.4	3.9	93.0469		580.3	5.75	103.183
OGL 1	mr15h15	609.1	9.1	610.9	9.1	617	9.1	Linnemann et al., 2008	Stephan et al., 2018	609.1	4.55	98.7196		620.9	3.5	104.935
														SNM 1	Ediacaran
SNM 1	mr11g09	540.1	6.2	546.5	6.2	573.5	6.2	Linnemann et al., 2008	Stephan et al., 2018	540.1	3.1	94.1761		1242.2	0	84.8334
SNM 1	mr11g11	1995	28.7	2038.6	28.7	2082.2	28.7	Linnemann et al., 2008	Stephan et al., 2018	2082.2	14.35	95.8121		612.7	4.5	85.4056
SNM 1	mr11g14	547.8	4.8	548.8	4.8	551.3	4.8	Linnemann et al., 2008	Stephan et al., 2018	547.8	2.4	99.3651		547.8	3.85	86.7871
SNM 1	mr11g15	593.3	9.3	603.3	9.3	641.8	9.3	Linnemann et al., 2008	Stephan et al., 2018	593.3	4.65	92.4431		559.1	3.95	87.1144
SNM 1	mr11g16	549.6	7.1	547.2	7.1	536.3	7.1	Linnemann et al., 2008	Stephan et al., 2018	549.6	3.55	102.48		576.8	6.95	88.9026
SNM 1	mr14a07	944	16.7	950.4	16.7	962.2	16.7	Linnemann et al., 2008	Stephan et al., 2018	944	8.35	98.1085		789	5.7	90.6167
SNM 1	mr14a08	700	13	717.3	13	770.1	13	Linnemann et al., 2008	Stephan et al., 2018	700	6.5	90.8973		700	6.5	90.8973
SNM 1	mr14a11	635.5	12.5	633.6	12.5	627.7	12.5	Linnemann et al., 2008	Stephan et al., 2018	635.5	6.25	101.243		582.7	4.95	91.8072
SNM 1	mr14a13	552	7.5	549.5	7.5	540.1	7.5	Linnemann et al., 2008	Stephan et al., 2018	552	3.75	102.203		607.4	5.2	92.128
SNM 1	mr14a14	578	7.2	576.5	7.2	569.8	7.2	Linnemann et al., 2008	Stephan et al., 2018	578	3.6	101.439		2662.2	9.75	92.1494
SNM 1	mr14b05	554.9	6.3	556	6.3	558.7	6.3	Linnemann et al., 2008	Stephan et al., 2018	554.9	3.15	99.3198		593.3	4.65	92.4431
SNM 1	mr14b06	614.4	12	621.4	12	645.3	12	Linnemann et al., 2008	Stephan et al., 2018	614.4	6	95.2115		3041.6	5.4	93.1319
SNM 1	mr14b08	789	11.4	811.2	11.4	870.7	11.4	Linnemann et al., 2008	Stephan et al., 2018	789	5.7	90.6167		553.2	3.1	93.4933
SNM 1	mr14b10	566.2	6.7	571.4	6.7	591.7	6.7	Linnemann et al., 2008	Stephan et al., 2018	566.2	3.35	95.6904		550.2	2.55	93.5555
SNM 1	mr14b11	566.2	6.8	570.8	6.8	588.1	6.8	Linnemann et al., 2008	Stephan et al., 2018	566.2	3.4	96.2761		1923.8	25.5	93.7416
SNM 1	mr14b13	582.7	9.9	593.5	9.9	634.7	9.9	Linnemann et al., 2008	Stephan et al., 2018	582.7	4.95	91.8072		593.3	7.6	93.9956
SNM 1	mr14b14	576.8	13.9	592	13.9	648.8	13.9	Linnemann et al., 2008	Stephan et al., 2018	576.8	6.95	88.9026		540.1	3.1	94.1761
SNM 1	mr14b15	566.8	5	565.1	5	558.7	5	Linnemann et al., 2008	Stephan et al., 2018	566.8	2.5	101.45		614.4	6	95.2115
SNM 1	mr14b16	573.8	8.5	569	8.5	547.6	8.5	Linnemann et al., 2008	Stephan et al., 2018	573.8	4.25	104.785		566.2	3.35	95.6904
SNM 1	mr14c06	1803.4	51	1860.3	51	1923.8	51	Linnemann et al., 2008	Stephan et al., 2018	1923.8	25.5	93.7416		634.3	6.85	95.7001
SNM 1	mr14c07	547.8	7.7	564.7	7.7	631.2	7.7	Linnemann et al., 2008	Stephan et al., 2018	547.8	3.85	86.7871		2082.2	14.35	95.8121
SNM 1	mr14c10	1053.8	0	1117.4	0	1242.2	0	Linnemann et al., 2008	Stephan et al., 2018	1242.2	0	84.8334		544.3	2.45	96.1491
SNM 1	mr14c13	550.2	5.1	557.6	5.1	588.1	5.1	Linnemann et al., 2008	Stephan et al., 2018	550.2	2.55	93.5555		566.2	3.4	96.2761
SNM 1	mr14g06	2453.2	19.5	2569.8	19.5	2662.2	19.5	Linnemann et al., 2008	Stephan et al., 2018	2662.2	9.75	92.1494		826	12.5	96.9142
SNM 1	mr14g07	612.7	9	635.5	9	717.4	9	Linnemann et al., 2008	Stephan et al., 2018	612.7	4.5	85.4056		944	8.35	98.1085
SNM 1	mr14g08	826	25	833.4	25	852.3	25	Linnemann et al., 2008	Stephan et al., 2018	826	12.5	96.9142		555.5	3.1	98.1275
SNM 1	mr14g09	555.5	6.2	558.1	6.2	566.1	6.2	Linnemann et al., 2008	Stephan et al., 2018	555.5	3.1	98.1275		554.9	3.15	99.3198
SNM 1	mr14g11	2832.7	10.8	2956.8	10.8	3041.6	10.8	Linnemann et al., 2008	Stephan et al., 2018	3041.6	5.4	93.1319		547.8	2.4	99.3651
SNM 1	mr15a06	534.8	8	535.5	8	536.3	8	Linnemann et al., 2008	Stephan et al., 2018	534.8	4	99.7203		534.8	4	99.7203
SNM 1	mr15a08	544.3	4.9	548.7	4.9	566.1	4.9	Linnemann et al., 2008	Stephan et al., 2018	544.3	2.45	96.1491		635.5	6.25	101.243
SNM 1	mr15a09	593.3	15.2	601.8	15.2	631.2	15.2	Linnemann et al., 2008	Stephan et al., 2018	593.3	7.6	93.9956		578	3.6	101.439
SNM 1	mr15a11	553.2	6.2	561.5	6.2	591.7	6.2	Linnemann et al., 2008	Stephan et al., 2018	553.2	3.1	93.4933		566.8	2.5	101.45
SNM 1	mr15a12	634.3	13.7	640.4	13.7	662.8	13.7	Linnemann et al., 2008	Stephan et al., 2018	634.3	6.85	95.7001		552	3.75	102.203
SNM 1	mr15a15	559.1	7.9	575.5	7.9	641.8	7.9	Linnemann et al., 2008	Stephan et al., 2018	559.1	3.95	87.1144		549.6	3.55	102.48
SNM 1	mr15a16	607.4	10.4	618.6	10.4	659.3	10.4	Linnemann et al., 2008	Stephan et al., 2018	607.4	5.2	92.128		573.8	4.25	104.785
														CTO-33	Ediacaran
CTO-33	1.1	610.9	14	610.8	14	610.2	14	Pereira et al., 2011	Stephan et al., 2018	610.9	7	100.115		570.3	0	76.6532
CTO-33	2.1	717.9	15	716.4	15	711	15	Pereira et al., 2011	Stephan et al., 2018	717.9	7.5	100.97		1632.5	0	84.974
CTO-33	3.1	604.4	15	600.8	15	584.5	15	Pereira et al., 2011	Stephan et al., 2018	604.4	7.5	103.405		2153.1	4.1	90.9386
CTO-33	4.1	615	12.9	623	12.9	651.3	12.9	Pereira et al., 2011	Stephan et al., 2018	615	6.45	94.4265		605	9.8	92.2537
CTO-33	5.1	712.1	14.8	716.9	14.8	729.7	14.8	Pereira et al., 2011	Stephan et al., 2018	712.1	7.4	97.588		619.1	7.1	93.4068
CTO-33	6.1	584.5	12.3	581.5	12.3	569.4	12.3	Pereira et al., 2011	Stephan et al., 2018	584.5	6.15	102.652		714.4	11.5	93.9506
CTO-33	7.1	602.7	13.8	610.3	13.8	639.3	13.8	Pereira et al., 2011	Stephan et al., 2018	602.7	6.9	94.275		602.7	6.9	94.275
CTO-33	8.1	2007.2	11.9	2064.7	11.9	2121.6	11.9	Pereira et al., 2011	Stephan et al., 2018	2121.6	5.95	94.6078		615	6.45	94.4265
CTO-33	8.2	1958	8.2	2055.1	8.2	2153.1	8.2	Pereira et al., 2011	Stephan et al., 2018	2153.1	4.1	90.9386		2121.6	5.95	94.6078
CTO-33	9.1	607.4	15.1	606.4	15.1	602.6	15.1	Pereira et al., 2011	Stephan et al., 2018	607.4	7.55	100.797		1869.6	19.9	94.8652
CTO-33	10.1	552.7	10.6	552.7	10.6	552	10.6	Pereira et al., 2011	Stephan et al., 2018	552.7	5.3	100.127		532	5.6	96.4992
CTO-33	10.2	532	11.2	535.8	11.2	551.3	11.2	Pereira et al., 2011	Stephan et al., 2018	532	5.6	96.4992		773.6	7.3	97.2348
CTO-33	10.3	560	11.8	560.1	11.8	558	11.8	Pereira et al., 2011	Stephan et al., 2018	560	5.9	100.358		563.9	5.95	97.5268
CTO-33	11.1	637.2	13.4	637.7	13.4	637.9	13.4	Pereira et al., 2011	Stephan et al., 2018	637.2	6.7	99.8903		712.1	7.4	97.588
CTO-33	11.2	617.3	14.1	618.6	14.1	621.6	14.1	Pereira et al., 2011	Stephan et al., 2018	617.3	7.05	99.3082		613.8	6.45	98.9681
CTO-33	12.1	563.9	11.9	567.1	11.9	578.2	11.9	Pereira et al., 2011	Stephan et al., 2018	563.9	5.95	97.5268		617.3	7.05	99.3082
CTO-33	13.1	773.6	14.6	779.6	14.6	795.6	14.6	Pereira et al., 2011	Stephan et al., 2018	773.6	7.3	97.2348		637.2	6.7	99.8903
CTO-33	13.2	570.3	0	606.4	0	744	0	Pereira et al., 2011	Stephan et al., 2018	570.3	0	76.6532		610.9	7	100.115
CTO-33	14.1	2235.9	100.7	2222	100.7	2209	100.7	Pereira et al., 2011	Stephan et al., 2018	2209	50.35	101.218		2008.5	13.75	100.124
CTO-33	14.2	1387.2	0	1487.2	0	1632.5	0	Pereira et al., 2011	Stephan et al., 2018	1632.5	0	84.974		552.7	5.3	100.127
CTO-33	15.1	2070.2	16.5	2063.7	16.5	2056.8	16.5	Pereira et al., 2011	Stephan et al., 2018	2056.8	8.25	100.651		637.8	6.1	100.141
CTO-33	16.1	714.4	23	726.4	23	760.4	23	Pereira et al., 2011	Stephan et al., 2018	714.4	11.5	93.9506		2056.1	17.7	100.16
CTO-33	17.1	2059.4	35.4	2058	35.4	2056.1	35.4	Pereira et al., 2011	Stephan et al., 2018	2056.1	17.7	100.16		560	5.9	100.358
CTO-33	18.1	637.8	12.2	637.7	12.2	636.9	12.2	Pereira et al., 2011	Stephan et al., 2018	637.8	6.1	100.141		2056.8	8.25	100.651
CTO-33	19.1	2051.5	19.3	2045.4	19.3	2038.2	19.3	Pereira et al., 2011	Stephan et al., 2018	2038.2	9.65	100.653		2038.2	9.65	100.653
CTO-33	19.2	2011	27.5	2010.2	27.5	2008.5	27.5	Pereira et al., 2011	Stephan et al., 2018	2008.5	13.75	100.124		607.4	7.55	100.797
CTO-33	20.1	619.1	14.2	629	14.2	662.8	14.2	Pereira et al., 2011	Stephan et al., 2018	619.1	7.1	93.4068		717.9	7.5	100.97
CTO-33	21.1	1773.6	39.8	1819	39.8	1869.6	39.8	Pereira et al., 2011	Stephan et al., 2018	1869.6	19.9	94.8652		2209	50.35	101.218
CTO-33	21.2	613.8	12.9	615.3	12.9	620.2	12.9	Pereira et al., 2011	Stephan et al., 2018	613.8	6.45	98.9681		584.5	6.15	102.652
CTO-33	22.1	605	19.6	615.8	19.6	655.8	19.6	Pereira et al., 2011	Stephan et al., 2018	605	9.8	92.2537		604.4	7.5	103.405
														2A-OGL	Early Cambrian
2A-OGL	1.1	798.1	18	787.1	21.9	757.1	71.8	Pereira et al., 2011	Stephan et al., 2018	798.1	9	105.415		528.7	5.6	75.4747
2A-OGL	1.2	782.7	19.2	782	51.3	779.9	189.2	Pereira et al., 2011	Stephan et al., 2018	782.7	9.6	100.359		605.6	10.4	81.3978
2A-OGL	3.1	560.9	14	563.6	32.9	573.5	152.2	Pereira et al., 2011	Stephan et al., 2018	560.9	7	97.803		2646.6	41.5	89.6433
2A-OGL	4.1	605.6	20.8	635.6	45.4	744	186.1	Pereira et al., 2011	Stephan et al., 2018	605.6	10.4	81.3978		617.3	7.05	93.1352
2A-OGL	5.1	590.9	12.4	587.2	22.3	569.8	95.8	Pereira et al., 2011	Stephan et al., 2018	590.9	6.2	103.703		1879.1	17.7	95.7905
2A-OGL	6.1	1943.7	57.1	1984.5	29.7	2027.3	20	Pereira et al., 2011	Stephan et al., 2018	2027.3	10	95.8763		2027.3	10	95.8763
2A-OGL	7.1	528.7	11.2	562.4	51	700.5	247	Pereira et al., 2011	Stephan et al., 2018	528.7	5.6	75.4747		536	6.15	97.2247
2A-OGL	8.1	556.4	11.7	556	15.4	554.3	61.1	Pereira et al., 2011	Stephan et al., 2018	556.4	5.85	100.379		611.5	5.85	97.4191
2A-OGL	9.1	617.3	14.1	627.4	21.5	662.8	85.7	Pereira et al., 2011	Stephan et al., 2018	617.3	7.05	93.1352		640.1	6.7	97.606
2A-OGL	10.1	615	12.9	614.2	17.5	610.5	64.9	Pereira et al., 2011	Stephan et al., 2018	615	6.45	100.737		560.9	7	97.803
2A-OGL	11.1	580.3	12.2	582.1	18.6	588.1	73.8	Pereira et al., 2011	Stephan et al., 2018	580.3	6.1	98.6737		600.9	6.3	98.4759
2A-OGL	12.1	639	13.4	629.6	24.4	595.4	99.7	Pereira et al., 2011	Stephan et al., 2018	639	6.7	107.323		580.3	6.1	98.6737
2A-OGL	13.1	650.1	12.4	648.5	11.5	641.8	26.7	Pereira et al., 2011	Stephan et al., 2018	650.1	6.2	101.293		573.8	7.15	99.4109
2A-OGL	13.2	640.1	13.4	643.7	21	655.8	81.5	Pereira et al., 2011	Stephan et al., 2018	640.1	6.7	97.606		1876.4	12.5	99.5204
2A-OGL	14.1	611.5	11.7	615.1	11.1	627.7	25.1	Pereira et al., 2011	Stephan et al., 2018	611.5	5.85	97.4191		627.9	6.6	99.6508
2A-OGL	15.1	573.8	14.3	575.2	30.7	577.2	143.5	Pereira et al., 2011	Stephan et al., 2018	573.8	7.15	99.4109		589.7	6.75	99.662
2A-OGL	16.1	469.2	10	467.7	13.5	459.3	62.1	Pereira et al., 2011	Stephan et al., 2018	469.2	5	102.155		782.7	9.6	100.359
2A-OGL	16.2	640.7	14.6	640.4	24.7	638.3	99	Pereira et al., 2011	Stephan et al., 2018	640.7	7.3	100.376		640.7	7.3	100.376
2A-OGL	17.1	1800	37.7	1837.1	25.5	1879.1	35.4	Pereira et al., 2011	Stephan et al., 2018	1879.1	17.7	95.7905		556.4	5.85	100.379
2A-OGL	18.1	536	12.3	539.4	24.3	551.3	113.5	Pereira et al., 2011	Stephan et al., 2018	536	6.15	97.2247		615	6.45	100.737
2A-OGL	19.1	2372.5	59.6	2523.1	54	2646.6	83	Pereira et al., 2011	Stephan et al., 2018	2646.6	41.5	89.6433		1883.8	21.65	101.12
2A-OGL	20.1	600.9	12.6	603	15.5	610.2	56.2	Pereira et al., 2011	Stephan et al., 2018	600.9	6.3	98.4759		650.1	6.2	101.293
2A-OGL	21.1	1867.4	35.7	1872.1	22.3	1876.4	25	Pereira et al., 2011	Stephan et al., 2018	1876.4	12.5	99.5204		598	6.85	101.683
2A-OGL	22.1	589.7	13.5	590.6	22.4	591.7	95.4	Pereira et al., 2011	Stephan et al., 2018	589.7	6.75	99.662		585.6	6.15	102.056
2A-OGL	23.1	634.3	14.5	629	21.6	609.8	86.5	Pereira et al., 2011	Stephan et al., 2018	634.3	7.25	104.018		469.2	5	102.155
2A-OGL	24.1	598	13.7	596.8	21.7	588.1	86.8	Pereira et al., 2011	Stephan et al., 2018	598	6.85	101.683		590.9	6.2	103.703
2A-OGL	25.1	585.6	12.3	583.2	15.1	573.8	56.6	Pereira et al., 2011	Stephan et al., 2018	585.6	6.15	102.056		634.3	7.25	104.018
2A-OGL	25.2	1904.9	42.9	1895.4	29.2	1883.8	43.3	Pereira et al., 2011	Stephan et al., 2018	1883.8	21.65	101.12		798.1	9	105.415
2A-OGL	26.1	627.9	13.2	628.5	15	630.1	51.7	Pereira et al., 2011	Stephan et al., 2018	627.9	6.6	99.6508		639	6.7	107.323
														ETZ-30	Early Cambrian
ETZ-30	b23	606.8	20.9	604.4	20.9	594.3	20.9	Pereira et al., 2012b	Stephan et al., 2018	606.8	10.45	102.103		2514.9	0	88.4727
ETZ-30	b24	548.6	11	547.2	11	540.8	11	Pereira et al., 2012b	Stephan et al., 2018	548.6	5.5	101.442		662.3	10.7	91.0128
ETZ-30	b25	556.4	13.3	553.2	13.3	538.9	13.3	Pereira et al., 2012b	Stephan et al., 2018	556.4	6.65	103.247		539.2	4.9	91.4053
ETZ-30	b26	553.5	11.7	553.9	11.7	554.6	11.7	Pereira et al., 2012b	Stephan et al., 2018	553.5	5.85	99.8017		758.1	8.25	91.8575
ETZ-30	b27	668.1	16.5	672.6	16.5	686.9	16.5	Pereira et al., 2012b	Stephan et al., 2018	668.1	8.25	97.2631		2387.6	7.8	92.6914
ETZ-30	b28	673.3	17.9	667.9	17.9	649.2	17.9	Pereira et al., 2012b	Stephan et al., 2018	673.3	8.95	103.712		597.5	6.3	93.1992
ETZ-30	b29	617.3	13	613.8	13	600.8	13	Pereira et al., 2012b	Stephan et al., 2018	617.3	6.5	102.746		696.5	7.6	93.4899
ETZ-30	b30	2439.1	32.2	2454.9	32.2	2466.5	32.2	Pereira et al., 2012b	Stephan et al., 2018	2466.5	16.1	98.8891		684.9	13.65	94.248
ETZ-30	b31	599	11.4	600.4	11.4	604.8	11.4	Pereira et al., 2012b	Stephan et al., 2018	599	5.7	99.041		632.6	6.05	94.6015
ETZ-30	b32	2152	70.1	2138.4	70.1	2124	70.1	Pereira et al., 2012b	Stephan et al., 2018	2124	35.05	101.318		604.8	6.05	94.8111
ETZ-30	b33	2135.3	63.3	2117.8	63.3	2099.9	63.3	Pereira et al., 2012b	Stephan et al., 2018	2099.9	31.65	101.686		601.2	7.2	94.8714
ETZ-30	b34	553.5	13.3	548.4	13.3	526.1	13.3	Pereira et al., 2012b	Stephan et al., 2018	553.5	6.65	105.208		551.5	5.3	95.1354
ETZ-30	b35	551.8	11.1	551.7	11.1	550.5	11.1	Pereira et al., 2012b	Stephan et al., 2018	551.8	5.55	100.236		615.6	6.45	95.2941
ETZ-30	b36	2957.3	27.8	2920.6	27.8	2894.7	27.8	Pereira et al., 2012b	Stephan et al., 2018	2894.7	13.9	102.163		679.7	6.45	96.1522
ETZ-30	b37	2121	30	2105.4	30	2089	30	Pereira et al., 2012b	Stephan et al., 2018	2089	15	101.532		660.5	7.55	96.1566
ETZ-30	b38	2018.1	35.3	2047.3	35.3	2075.4	35.3	Pereira et al., 2012b	Stephan et al., 2018	2075.4	17.65	97.2391		552.1	5.3	96.403
ETZ-30	b39	2900	32.5	2916.6	32.5	2927.8	32.5	Pereira et al., 2012b	Stephan et al., 2018	2927.8	16.25	99.0505		678	6.45	96.4164
ETZ-30	b40	2510.7	28.6	2539.1	28.6	2560.8	28.6	Pereira et al., 2012b	Stephan et al., 2018	2560.8	14.3	98.0436		600	5.15	96.5873
ETZ-30	b41	561.4	15.1	564.6	15.1	576.8	15.1	Pereira et al., 2012b	Stephan et al., 2018	561.4	7.55	97.3301		2389	7	96.5885
ETZ-30	b42	540	12.4	539.3	12.4	535.2	12.4	Pereira et al., 2012b	Stephan et al., 2018	540	6.2	100.897		538.8	6.45	96.6978
ETZ-30	b43	555.5	13.8	550	13.8	526.1	13.8	Pereira et al., 2012b	Stephan et al., 2018	555.5	6.9	105.588		3085.7	8.95	96.8014
ETZ-30	b44	649.5	23.5	650.6	23.5	654.1	23.5	Pereira et al., 2012b	Stephan et al., 2018	649.5	11.75	99.2967		591.1	5.95	96.997
ETZ-30	b45	560.7	11.8	548.1	11.8	494.8	11.8	Pereira et al., 2012b	Stephan et al., 2018	560.7	5.9	113.319		544.3	5.75	97.0405
ETZ-30	c1	660.5	15.1	666.7	15.1	686.9	15.1	Pereira et al., 2012b	Stephan et al., 2018	660.5	7.55	96.1566		684.4	8.45	97.2297
ETZ-30	c10	586.8	12.3	586.9	12.3	586.3	12.3	Pereira et al., 2012b	Stephan et al., 2018	586.8	6.15	100.085		2075.4	17.65	97.2391
ETZ-30	c11	604.4	13.8	605.3	13.8	607.6	13.8	Pereira et al., 2012b	Stephan et al., 2018	604.4	6.9	99.4733		668.1	8.25	97.2631
ETZ-30	c12	632.6	12.1	640.7	12.1	668.7	12.1	Pereira et al., 2012b	Stephan et al., 2018	632.6	6.05	94.6015		565.6	6.25	97.2657
ETZ-30	c13	3214.5	11.6	3241.6	11.6	3257.5	11.6	Pereira et al., 2012b	Stephan et al., 2018	3257.5	5.8	98.68		630.8	6.9	97.2706
ETZ-30	c14	649.5	14.2	651.3	14.2	656.8	14.2	Pereira et al., 2012b	Stephan et al., 2018	649.5	7.1	98.8886		561.4	7.55	97.3301
ETZ-30	c15	662.3	21.4	677.4	21.4	727.7	21.4	Pereira et al., 2012b	Stephan et al., 2018	662.3	10.7	91.0128		2389	8.65	97.9824
ETZ-30	c16	693.6	15.1	691	15.1	680.7	15.1	Pereira et al., 2012b	Stephan et al., 2018	693.6	7.55	101.895		2560.8	14.3	98.0436
ETZ-30	c17	565.6	12.5	569	12.5	581.5	12.5	Pereira et al., 2012b	Stephan et al., 2018	565.6	6.25	97.2657		695.9	7.6	98.1523
ETZ-30	c18	764.4	29.6	767.3	29.6	775.3	29.6	Pereira et al., 2012b	Stephan et al., 2018	764.4	14.8	98.5941		2044.9	18.6	98.2493
ETZ-30	c19	2213.1	15.6	2305.5	15.6	2387.6	15.6	Pereira et al., 2012b	Stephan et al., 2018	2387.6	7.8	92.6914		2714.3	11.65	98.2537
ETZ-30	c2	621.4	14.2	620.9	14.2	617.7	14.2	Pereira et al., 2012b	Stephan et al., 2018	621.4	7.1	100.599		764.4	14.8	98.5941
ETZ-30	c20	634.3	12.7	628.2	12.7	604.8	12.7	Pereira et al., 2012b	Stephan et al., 2018	634.3	6.35	104.878		3257.5	5.8	98.68
ETZ-30	c21	630.8	13.8	634.8	13.8	648.5	13.8	Pereira et al., 2012b	Stephan et al., 2018	630.8	6.9	97.2706		649.5	7.1	98.8886
ETZ-30	c22	580.4	14.4	578.3	14.4	568.7	14.4	Pereira et al., 2012b	Stephan et al., 2018	580.4	7.2	102.057		2466.5	16.1	98.8891
ETZ-30	c23	679.7	12.9	686.3	12.9	706.9	12.9	Pereira et al., 2012b	Stephan et al., 2018	679.7	6.45	96.1522		599	5.7	99.041
ETZ-30	c24	556	11.7	551.7	11.7	532.9	11.7	Pereira et al., 2012b	Stephan et al., 2018	556	5.85	104.335		2927.8	16.25	99.0505
ETZ-30	c25	600	10.3	604.7	10.3	621.2	10.3	Pereira et al., 2012b	Stephan et al., 2018	600	5.15	96.5873		649.5	11.75	99.2967
ETZ-30	c26	737.5	20.2	737.8	20.2	737.7	20.2	Pereira et al., 2012b	Stephan et al., 2018	737.5	10.1	99.9729		640.7	8.25	99.3333
ETZ-30	c27	744.9	16.9	743.1	16.9	737	16.9	Pereira et al., 2012b	Stephan et al., 2018	744.9	8.45	101.072		2721.4	10.85	99.4635
ETZ-30	c28	2099.6	35.3	2094.7	35.3	2089	35.3	Pereira et al., 2012b	Stephan et al., 2018	2089	17.65	100.507		604.4	6.9	99.4733
ETZ-30	c29	615.6	12.9	622.3	12.9	646	12.9	Pereira et al., 2012b	Stephan et al., 2018	615.6	6.45	95.2941		2118.6	8.9	99.5422
ETZ-30	c3	640.7	16.5	641.7	16.5	645	16.5	Pereira et al., 2012b	Stephan et al., 2018	640.7	8.25	99.3333		2909.4	9.05	99.6082
ETZ-30	c30	2340.8	17.3	2366.8	17.3	2389	17.3	Pereira et al., 2012b	Stephan et al., 2018	2389	8.65	97.9824		553.5	5.85	99.8017
ETZ-30	c31	614.1	11.7	613.9	11.7	612.7	11.7	Pereira et al., 2012b	Stephan et al., 2018	614.1	5.85	100.228		737.5	10.1	99.9729
ETZ-30	c32	552.1	10.6	556.3	10.6	572.7	10.6	Pereira et al., 2012b	Stephan et al., 2018	552.1	5.3	96.403		586.8	6.15	100.085
ETZ-30	c33	2307.5	14	2351.6	14	2389	14	Pereira et al., 2012b	Stephan et al., 2018	2389	7	96.5885		614.1	5.85	100.228
ETZ-30	c34	551.5	10.6	557.1	10.6	579.7	10.6	Pereira et al., 2012b	Stephan et al., 2018	551.5	5.3	95.1354		551.8	5.55	100.236
ETZ-30	c35	758.1	16.5	775.4	16.5	825.3	16.5	Pereira et al., 2012b	Stephan et al., 2018	758.1	8.25	91.8575		2060.2	12.45	100.257
ETZ-30	c36	684.9	27.3	695.2	27.3	726.7	27.3	Pereira et al., 2012b	Stephan et al., 2018	684.9	13.65	94.248		549.7	8.15	100.383
ETZ-30	c37	539.2	9.8	549.2	9.8	589.9	9.8	Pereira et al., 2012b	Stephan et al., 2018	539.2	4.9	91.4053		2089	17.65	100.507
ETZ-30	c38	2225	0	2380.2	0	2514.9	0	Pereira et al., 2012b	Stephan et al., 2018	2514.9	0	88.4727		600.7	7.45	100.536
ETZ-30	c39	2108.9	17.8	2114	17.8	2118.6	17.8	Pereira et al., 2012b	Stephan et al., 2018	2118.6	8.9	99.5422		621.4	7.1	100.599
ETZ-30	c4	591.7	11.3	590.8	11.3	585.9	11.3	Pereira et al., 2012b	Stephan et al., 2018	591.7	5.65	100.99		540	6.2	100.897
ETZ-30	c40	696.5	15.2	708.4	15.2	745	15.2	Pereira et al., 2012b	Stephan et al., 2018	696.5	7.6	93.4899		591.7	5.65	100.99
ETZ-30	c41	2666.9	23.3	2694.1	23.3	2714.3	23.3	Pereira et al., 2012b	Stephan et al., 2018	2714.3	11.65	98.2537		744.9	8.45	101.072
ETZ-30	c42	2706.8	21.7	2715.3	21.7	2721.4	21.7	Pereira et al., 2012b	Stephan et al., 2018	2721.4	10.85	99.4635		2124	35.05	101.318
ETZ-30	c43	2009.1	37.2	2026.8	37.2	2044.9	37.2	Pereira et al., 2012b	Stephan et al., 2018	2044.9	18.6	98.2493		548.6	5.5	101.442
ETZ-30	c45	2065.5	24.9	2063.7	24.9	2060.2	24.9	Pereira et al., 2012b	Stephan et al., 2018	2060.2	12.45	100.257		2089	15	101.532
ETZ-30	c46	2898	18.1	2905.1	18.1	2909.4	18.1	Pereira et al., 2012b	Stephan et al., 2018	2909.4	9.05	99.6082		620.3	7.1	101.605
ETZ-30	c47	620.3	14.2	618.4	14.2	610.5	14.2	Pereira et al., 2012b	Stephan et al., 2018	620.3	7.1	101.605		2099.9	31.65	101.686
ETZ-30	c48	600.7	14.9	600.2	14.9	597.5	14.9	Pereira et al., 2012b	Stephan et al., 2018	600.7	7.45	100.536		693.6	7.55	101.895
ETZ-30	c49	601.2	14.4	608.2	14.4	633.7	14.4	Pereira et al., 2012b	Stephan et al., 2018	601.2	7.2	94.8714		580.4	7.2	102.057
ETZ-30	c5	597.5	12.6	606.9	12.6	641.1	12.6	Pereira et al., 2012b	Stephan et al., 2018	597.5	6.3	93.1992		606.8	10.45	102.103
ETZ-30	c50	575	12.1	569.2	12.1	544.6	12.1	Pereira et al., 2012b	Stephan et al., 2018	575	6.05	105.582		2894.7	13.9	102.163
ETZ-30	c51	695.9	15.2	699.1	15.2	709	15.2	Pereira et al., 2012b	Stephan et al., 2018	695.9	7.6	98.1523		617.3	6.5	102.746
ETZ-30	c52	538.8	12.9	542.5	12.9	557.2	12.9	Pereira et al., 2012b	Stephan et al., 2018	538.8	6.45	96.6978		556.4	6.65	103.247
ETZ-30	c53	549.7	16.3	549.5	16.3	547.6	16.3	Pereira et al., 2012b	Stephan et al., 2018	549.7	8.15	100.383		673.3	8.95	103.712
ETZ-30	c54	604.8	12.1	612	12.1	637.9	12.1	Pereira et al., 2012b	Stephan et al., 2018	604.8	6.05	94.8111		556	5.85	104.335
ETZ-30	c55	591.1	11.9	595.1	11.9	609.4	11.9	Pereira et al., 2012b	Stephan et al., 2018	591.1	5.95	96.997		634.3	6.35	104.878
ETZ-30	c6	544.3	11.5	547.7	11.5	560.9	11.5	Pereira et al., 2012b	Stephan et al., 2018	544.3	5.75	97.0405		553.5	6.65	105.208
ETZ-30	c7	684.4	16.9	689.2	16.9	703.9	16.9	Pereira et al., 2012b	Stephan et al., 2018	684.4	8.45	97.2297		575	6.05	105.582
ETZ-30	c8	2987	17.9	3046.9	17.9	3085.7	17.9	Pereira et al., 2012b	Stephan et al., 2018	3085.7	8.95	96.8014		555.5	6.9	105.588
ETZ-30	c9	678	12.9	684.2	12.9	703.2	12.9	Pereira et al., 2012b	Stephan et al., 2018	678	6.45	96.4164		560.7	5.9	113.319
														ETZ-32	Ediacaran
ETZ-32	A19	532.3	15.3	544.7	15.3	596.5	15.3	Pereira et al., 2012b	Stephan et al., 2018	532.3	7.65	89.2372		531.1	0	53.5059
ETZ-32	A20	688.5	17	719.9	17	818.4	17	Pereira et al., 2012b	Stephan et al., 2018	688.5	8.5	84.1276		1325.6	0	82.0157
ETZ-32	A21	679.2	18.1	709.9	18.1	807	18.1	Pereira et al., 2012b	Stephan et al., 2018	679.2	9.05	84.1636		688.5	8.5	84.1276
ETZ-32	A22	2663.5	0	2837.2	0	2962.3	0	Pereira et al., 2012b	Stephan et al., 2018	2962.3	0	89.9132		679.2	9.05	84.1636
ETZ-32	A23	711.4	19.5	723.4	19.5	760.1	19.5	Pereira et al., 2012b	Stephan et al., 2018	711.4	9.75	93.5929		658.1	7.5	84.1775
ETZ-32	A24	1969.9	33.6	2019	33.6	2068.5	33.6	Pereira et al., 2012b	Stephan et al., 2018	2068.5	16.8	95.2333		676.2	9.3	86.0743
ETZ-32	A25	740.1	19.6	734.3	19.6	715.7	19.6	Pereira et al., 2012b	Stephan et al., 2018	740.1	9.8	103.409		764.4	8.65	89.2365
ETZ-32	A26	665.5	21.5	674	21.5	701.5	21.5	Pereira et al., 2012b	Stephan et al., 2018	665.5	10.75	94.8681		532.3	7.65	89.2372
ETZ-32	A27	667.6	17.1	673.7	17.1	693.4	17.1	Pereira et al., 2012b	Stephan et al., 2018	667.6	8.55	96.2792		2962.3	0	89.9132
ETZ-32	A28	1817.2	36.2	1835.4	36.2	1855.4	36.2	Pereira et al., 2012b	Stephan et al., 2018	1855.4	18.1	97.9411		664.1	7.9	91.1724
ETZ-32	A29	590	13	598.6	13	630.1	13	Pereira et al., 2012b	Stephan et al., 2018	590	6.5	93.6359		602.7	9.8	91.3736
ETZ-32	A30	618.5	17.1	622.4	17.1	635.8	17.1	Pereira et al., 2012b	Stephan et al., 2018	618.5	8.55	97.279		633.7	8.15	91.9872
ETZ-32	A31	593.5	17.6	598.6	17.6	617.3	17.6	Pereira et al., 2012b	Stephan et al., 2018	593.5	8.8	96.1445		719.6	10.9	92.1265
ETZ-32	A32	595	17.1	598.4	17.1	609.8	17.1	Pereira et al., 2012b	Stephan et al., 2018	595	8.55	97.573		755.3	9.6	92.5386
ETZ-32	A33	579.3	16.6	585.8	16.6	609.8	16.6	Pereira et al., 2012b	Stephan et al., 2018	579.3	8.3	94.9984		599.2	11.45	92.9569
ETZ-32	A34	664.1	15.8	679.1	15.8	728.4	15.8	Pereira et al., 2012b	Stephan et al., 2018	664.1	7.9	91.1724		584.5	8.95	93.0732
ETZ-32	A35	594.5	18.2	592	18.2	581.5	18.2	Pereira et al., 2012b	Stephan et al., 2018	594.5	9.1	102.236		770.2	8	93.1881
ETZ-32	A36	591.6	15.8	589.7	15.8	581.5	15.8	Pereira et al., 2012b	Stephan et al., 2018	591.6	7.9	101.737		611.5	9.05	93.3445
ETZ-32	A37	632.8	16.9	638.2	16.9	656.2	16.9	Pereira et al., 2012b	Stephan et al., 2018	632.8	8.45	96.434		808.4	8.75	93.3703
ETZ-32	A38	600.5	15.5	591.5	15.5	556.1	15.5	Pereira et al., 2012b	Stephan et al., 2018	600.5	7.75	107.984		723.1	11.3	93.46
ETZ-32	A39	782.6	22.1	788	22.1	802.6	22.1	Pereira et al., 2012b	Stephan et al., 2018	782.6	11.05	97.5081		711.4	9.75	93.5929
ETZ-32	A40	824	20.9	818.4	20.9	802.6	20.9	Pereira et al., 2012b	Stephan et al., 2018	824	10.45	102.666		590	6.5	93.6359
ETZ-32	A41	544.2	12	547	12	558	12	Pereira et al., 2012b	Stephan et al., 2018	544.2	6	97.5269		681.5	9.7	93.8188
ETZ-32	A42	531.1	0	627.7	0	992.6	0	Pereira et al., 2012b	Stephan et al., 2018	531.1	0	53.5059		590.3	10.15	93.8922
ETZ-32	A43	646.9	21.5	642.4	21.5	625.9	21.5	Pereira et al., 2012b	Stephan et al., 2018	646.9	10.75	103.355		599.2	7.75	94.0807
ETZ-32	A44	639	17	638.4	17	635.1	17	Pereira et al., 2012b	Stephan et al., 2018	639	8.5	100.614		664.8	10.1	94.405
ETZ-32	A45	684.6	16.9	682.3	16.9	673.5	16.9	Pereira et al., 2012b	Stephan et al., 2018	684.6	8.45	101.648		761.6	8.25	94.6322
ETZ-32	A46	664.8	20.2	674.1	20.2	704.2	20.2	Pereira et al., 2012b	Stephan et al., 2018	664.8	10.1	94.405		665.5	10.75	94.8681
ETZ-32	A47	603.6	17.3	589	17.3	532.2	17.3	Pereira et al., 2012b	Stephan et al., 2018	603.6	8.65	113.416		627.9	7.8	94.935
ETZ-32	A48	625.1	17.9	626.6	17.9	630.8	17.9	Pereira et al., 2012b	Stephan et al., 2018	625.1	8.95	99.0964		579.3	8.3	94.9984
ETZ-32	A49	649.6	16.1	650.2	16.1	651.3	16.1	Pereira et al., 2012b	Stephan et al., 2018	649.6	8.05	99.739		728.3	8.95	95.0907
ETZ-32	A50	612.1	15.8	603.3	15.8	569.4	15.8	Pereira et al., 2012b	Stephan et al., 2018	612.1	7.9	107.499		2068.5	16.8	95.2333
ETZ-32	A51	543.8	15.1	548.8	15.1	568.7	15.1	Pereira et al., 2012b	Stephan et al., 2018	543.8	7.55	95.6216		1968.6	17	95.3012
ETZ-32	A52	658.1	15	687	15	781.8	15	Pereira et al., 2012b	Stephan et al., 2018	658.1	7.5	84.1775		918.9	12.85	95.3809
ETZ-32	A53	651.9	21.7	640.3	21.7	598.6	21.7	Pereira et al., 2012b	Stephan et al., 2018	651.9	10.85	108.904		655.3	8.75	95.3996
ETZ-32	A54	574.2	13.7	573.8	13.7	571.6	13.7	Pereira et al., 2012b	Stephan et al., 2018	574.2	6.85	100.455		2472.8	18.65	95.402
ETZ-32	A55	614.4	22.3	616.9	22.3	625.5	22.3	Pereira et al., 2012b	Stephan et al., 2018	614.4	11.15	98.2254		676.8	9.95	95.418
ETZ-32	B1	651.8	18.6	658.3	18.6	678.7	18.6	Pereira et al., 2012b	Stephan et al., 2018	651.8	9.3	96.0365		617.9	8.85	95.4876
ETZ-32	B10	2015.7	37.1	2049.5	37.1	2082.9	37.1	Pereira et al., 2012b	Stephan et al., 2018	2082.9	18.55	96.7737		543.8	7.55	95.6216
ETZ-32	B11	1836.9	34.5	1837.6	34.5	1837.3	34.5	Pereira et al., 2012b	Stephan et al., 2018	1837.3	17.25	99.9782		651.8	9.3	96.0365
ETZ-32	B12	584.5	17.9	593.8	17.9	628	17.9	Pereira et al., 2012b	Stephan et al., 2018	584.5	8.95	93.0732		723.7	10.25	96.0451
ETZ-32	B13	2506.8	25.4	2504.4	25.4	2501.9	25.4	Pereira et al., 2012b	Stephan et al., 2018	2501.9	12.7	100.196		593.5	8.8	96.1445
ETZ-32	B14	1923.6	42.8	1956.5	42.8	1990.7	42.8	Pereira et al., 2012b	Stephan et al., 2018	1990.7	21.4	96.6293		812.9	11.1	96.2126
ETZ-32	B15	627.9	15.6	635.4	15.6	661.4	15.6	Pereira et al., 2012b	Stephan et al., 2018	627.9	7.8	94.935		667.6	8.55	96.2792
ETZ-32	B16	622.6	28.5	621.2	28.5	614.5	28.5	Pereira et al., 2012b	Stephan et al., 2018	622.6	14.25	101.318		632.8	8.45	96.434
ETZ-32	B17	590.3	20.3	598.3	20.3	628.7	20.3	Pereira et al., 2012b	Stephan et al., 2018	590.3	10.15	93.8922		762.7	10.8	96.4832
ETZ-32	B18	681.5	19.4	692.1	19.4	726.4	19.4	Pereira et al., 2012b	Stephan et al., 2018	681.5	9.7	93.8188		1990.7	21.4	96.6293
ETZ-32	B19	617.9	17.7	624.4	17.7	647.1	17.7	Pereira et al., 2012b	Stephan et al., 2018	617.9	8.85	95.4876		2082.9	18.55	96.7737
ETZ-32	B2	655.3	17.5	662.6	17.5	686.9	17.5	Pereira et al., 2012b	Stephan et al., 2018	655.3	8.75	95.3996		664.6	8.55	96.8522
ETZ-32	B20	714.4	28.4	717.6	28.4	726.4	28.4	Pereira et al., 2012b	Stephan et al., 2018	714.4	14.2	98.348		602.7	7.2	96.9595
ETZ-32	B21	602.7	19.6	615.1	19.6	659.6	19.6	Pereira et al., 2012b	Stephan et al., 2018	602.7	9.8	91.3736		688.4	9.45	97.1493
ETZ-32	B22	599.2	15.5	607.4	15.5	636.9	15.5	Pereira et al., 2012b	Stephan et al., 2018	599.2	7.75	94.0807		618.5	8.55	97.279
ETZ-32	B3	672.2	21.7	674.3	21.7	680.7	21.7	Pereira et al., 2012b	Stephan et al., 2018	672.2	10.85	98.7513		782.6	11.05	97.5081
ETZ-32	B4	645.4	18.4	645.1	18.4	643.2	18.4	Pereira et al., 2012b	Stephan et al., 2018	645.4	9.2	100.342		544.2	6	97.5269
ETZ-32	B5	1876.1	34	1920.8	34	1968.6	34	Pereira et al., 2012b	Stephan et al., 2018	1968.6	17	95.3012		595	8.55	97.573
ETZ-32	B6	595.6	19.3	596.5	19.3	599	19.3	Pereira et al., 2012b	Stephan et al., 2018	595.6	9.65	99.4324		1855.4	18.1	97.9411
ETZ-32	B7	608.5	18.6	597	18.6	552.4	18.6	Pereira et al., 2012b	Stephan et al., 2018	608.5	9.3	110.156		682.6	10.7	98.1029
ETZ-32	B8	599.2	22.9	608.9	22.9	644.6	22.9	Pereira et al., 2012b	Stephan et al., 2018	599.2	11.45	92.9569		614.4	11.15	98.2254
ETZ-32	B9	585	16.2	586.6	16.2	591.4	16.2	Pereira et al., 2012b	Stephan et al., 2018	585	8.1	98.9178		714.4	14.2	98.348
ETZ-32	D1	701.1	31.9	687.6	31.9	642.8	31.9	Pereira et al., 2012b	Stephan et al., 2018	701.1	15.95	109.07		744.9	8.1	98.4276
ETZ-32	D10	1768.7	54.8	1773.6	54.8	1778.6	54.8	Pereira et al., 2012b	Stephan et al., 2018	1778.6	27.4	99.4434		614.4	7.05	98.5089
ETZ-32	D11	639.6	18.3	638.3	18.3	632.3	18.3	Pereira et al., 2012b	Stephan et al., 2018	639.6	9.15	101.155		767.3	11.2	98.6374
ETZ-32	D12	742.1	18.2	742.7	18.2	744.3	18.2	Pereira et al., 2012b	Stephan et al., 2018	742.1	9.1	99.7044		672.2	10.85	98.7513
ETZ-32	D13	2156.6	29.8	2151.5	29.8	2146.3	29.8	Pereira et al., 2012b	Stephan et al., 2018	2146.3	14.9	100.48		893.7	8.35	98.7514
ETZ-32	D14	610.3	17.5	610.8	17.5	610.9	17.5	Pereira et al., 2012b	Stephan et al., 2018	610.3	8.75	99.9018		585	8.1	98.9178
ETZ-32	D15	812.9	22.2	821.6	22.2	844.9	22.2	Pereira et al., 2012b	Stephan et al., 2018	812.9	11.1	96.2126		888.1	8.7	98.9857
ETZ-32	D16	770.2	16	785.2	16	826.5	16	Pereira et al., 2012b	Stephan et al., 2018	770.2	8	93.1881		2381.2	16.25	99.0341
ETZ-32	D17	728.3	17.9	737.8	17.9	765.9	17.9	Pereira et al., 2012b	Stephan et al., 2018	728.3	8.95	95.0907		753.5	10.3	99.0535
ETZ-32	D18	763.3	18	756.2	18	734.1	18	Pereira et al., 2012b	Stephan et al., 2018	763.3	9	103.978		625.1	8.95	99.0964
ETZ-32	D19	636.1	19.4	630.5	19.4	609.8	19.4	Pereira et al., 2012b	Stephan et al., 2018	636.1	9.7	104.313		595.6	9.65	99.4324
ETZ-32	D2	2358.2	32.5	2370.9	32.5	2381.2	32.5	Pereira et al., 2012b	Stephan et al., 2018	2381.2	16.25	99.0341		1778.6	27.4	99.4434
ETZ-32	D20	767.3	22.4	770.1	22.4	777.9	22.4	Pereira et al., 2012b	Stephan et al., 2018	767.3	11.2	98.6374		688.4	9.8	99.6237
ETZ-32	D21	755.3	19.2	771.1	19.2	816.2	19.2	Pereira et al., 2012b	Stephan et al., 2018	755.3	9.6	92.5386		742.1	9.1	99.7044
ETZ-32	D22	688.4	19.6	689.1	19.6	691	19.6	Pereira et al., 2012b	Stephan et al., 2018	688.4	9.8	99.6237		649.6	8.05	99.739
ETZ-32	D23	753.5	20.6	755.8	20.6	760.7	20.6	Pereira et al., 2012b	Stephan et al., 2018	753.5	10.3	99.0535		610.3	8.75	99.9018
ETZ-32	D24	918.9	25.7	932.4	25.7	963.4	25.7	Pereira et al., 2012b	Stephan et al., 2018	918.9	12.85	95.3809		751.8	8.15	99.9468
ETZ-32	D25	593.3	18.7	585	18.7	551.3	18.7	Pereira et al., 2012b	Stephan et al., 2018	593.3	9.35	107.618		1837.3	17.25	99.9782
ETZ-32	D26	682.6	18.8	675	18.8	648.1	18.8	Pereira et al., 2012b	Stephan et al., 2018	682.6	9.4	105.323		717.3	14.25	100.084
ETZ-32	D27	688.4	18.9	693.6	18.9	708.6	18.9	Pereira et al., 2012b	Stephan et al., 2018	688.4	9.45	97.1493		2501.9	12.7	100.196
ETZ-32	D28	892.5	20	884.3	20	863.3	20	Pereira et al., 2012b	Stephan et al., 2018	892.5	10	103.382		645.4	9.2	100.342
ETZ-32	D29	744.9	16.2	748	16.2	756.8	16.2	Pereira et al., 2012b	Stephan et al., 2018	744.9	8.1	98.4276		574.2	6.85	100.455
ETZ-32	D3	737.5	23	724.4	23	684.1	23	Pereira et al., 2012b	Stephan et al., 2018	737.5	11.5	107.806		2146.3	14.9	100.48
ETZ-32	D30	611.5	18.1	620.9	18.1	655.1	18.1	Pereira et al., 2012b	Stephan et al., 2018	611.5	9.05	93.3445		639	8.5	100.614
ETZ-32	D31	888.1	17.4	891	17.4	897.2	17.4	Pereira et al., 2012b	Stephan et al., 2018	888.1	8.7	98.9857		639.6	9.15	101.155
ETZ-32	D32	764.4	17.3	789	17.3	856.6	17.3	Pereira et al., 2012b	Stephan et al., 2018	764.4	8.65	89.2365		682	10.35	101.217
ETZ-32	D33	893.7	16.7	897.4	16.7	905	16.7	Pereira et al., 2012b	Stephan et al., 2018	893.7	8.35	98.7514		622.6	14.25	101.318
ETZ-32	D34	602.7	14.4	606.8	14.4	621.6	14.4	Pereira et al., 2012b	Stephan et al., 2018	602.7	7.2	96.9595		687.3	9.45	101.536
ETZ-32	D35	614.4	14.1	616.5	14.1	623.7	14.1	Pereira et al., 2012b	Stephan et al., 2018	614.4	7.05	98.5089		684.6	8.45	101.648
ETZ-32	D36	808.4	17.5	823.9	17.5	865.8	17.5	Pereira et al., 2012b	Stephan et al., 2018	808.4	8.75	93.3703		591.6	7.9	101.737
ETZ-32	D37	676.8	19.9	684.4	19.9	709.3	19.9	Pereira et al., 2012b	Stephan et al., 2018	676.8	9.95	95.418		664	8.85	101.794
ETZ-32	D38	1087.2	0	1169.9	0	1325.6	0	Pereira et al., 2012b	Stephan et al., 2018	1325.6	0	82.0157		825.4	8.9	102.002
ETZ-32	D39	946.2	26.4	935.2	26.4	908.2	26.4	Pereira et al., 2012b	Stephan et al., 2018	946.2	13.2	104.184		594.5	9.1	102.236
ETZ-32	D4	719.6	21.8	734.8	21.8	781.1	21.8	Pereira et al., 2012b	Stephan et al., 2018	719.6	10.9	92.1265		824	10.45	102.666
ETZ-32	D40	682.6	21.4	685.7	21.4	695.8	21.4	Pereira et al., 2012b	Stephan et al., 2018	682.6	10.7	98.1029		2129.3	21.05	103.076
ETZ-32	D41	723.7	20.5	731.4	20.5	753.5	20.5	Pereira et al., 2012b	Stephan et al., 2018	723.7	10.25	96.0451		694.2	10.85	103.181
ETZ-32	D42	2194.8	42.1	2161.2	42.1	2129.3	42.1	Pereira et al., 2012b	Stephan et al., 2018	2129.3	21.05	103.076		646.9	10.75	103.355
ETZ-32	D43	682	20.7	680.4	20.7	673.8	20.7	Pereira et al., 2012b	Stephan et al., 2018	682	10.35	101.217		892.5	10	103.382
ETZ-32	D44	762.7	21.6	770.1	21.6	790.5	21.6	Pereira et al., 2012b	Stephan et al., 2018	762.7	10.8	96.4832		740.1	9.8	103.409
ETZ-32	D45	723.1	22.6	735.8	22.6	773.7	22.6	Pereira et al., 2012b	Stephan et al., 2018	723.1	11.3	93.46		702.3	8	103.645
ETZ-32	D46	717.3	28.5	717.4	28.5	716.7	28.5	Pereira et al., 2012b	Stephan et al., 2018	717.3	14.25	100.084		763.3	9	103.978
ETZ-32	D47	578	17.1	565.9	17.1	515.9	17.1	Pereira et al., 2012b	Stephan et al., 2018	578	8.55	112.037		946.2	13.2	104.184
ETZ-32	D48	676.2	18.6	702.5	18.6	785.6	18.6	Pereira et al., 2012b	Stephan et al., 2018	676.2	9.3	86.0743		636.1	9.7	104.313
ETZ-32	D49	664.6	17.1	669.8	17.1	686.2	17.1	Pereira et al., 2012b	Stephan et al., 2018	664.6	8.55	96.8522		682.6	9.4	105.323
ETZ-32	D5	664	17.7	661.7	17.7	652.3	17.7	Pereira et al., 2012b	Stephan et al., 2018	664	8.85	101.794		583.3	8.35	107.047
ETZ-32	D50	653	27.9	624.1	27.9	520.1	27.9	Pereira et al., 2012b	Stephan et al., 2018	653	13.95	125.553		612.1	7.9	107.499
ETZ-32	D51	825.4	17.8	821.1	17.8	809.2	17.8	Pereira et al., 2012b	Stephan et al., 2018	825.4	8.9	102.002		593.3	9.35	107.618
ETZ-32	D52	751.8	16.3	752.4	16.3	752.2	16.3	Pereira et al., 2012b	Stephan et al., 2018	751.8	8.15	99.9468		737.5	11.5	107.806
ETZ-32	D53	761.6	16.5	772.5	16.5	804.8	16.5	Pereira et al., 2012b	Stephan et al., 2018	761.6	8.25	94.6322		600.5	7.75	107.984
ETZ-32	D54	633.7	16.3	646.2	16.3	688.9	16.3	Pereira et al., 2012b	Stephan et al., 2018	633.7	8.15	91.9872		651.9	10.85	108.904
ETZ-32	D55	702.3	16	696.7	16	677.6	16	Pereira et al., 2012b	Stephan et al., 2018	702.3	8	103.645		701.1	15.95	109.07
ETZ-32	D6	2359.1	37.3	2420.8	37.3	2472.8	37.3	Pereira et al., 2012b	Stephan et al., 2018	2472.8	18.65	95.402		608.5	9.3	110.156
ETZ-32	D7	687.3	18.9	685.3	18.9	676.9	18.9	Pereira et al., 2012b	Stephan et al., 2018	687.3	9.45	101.536		578	8.55	112.037
ETZ-32	D8	694.2	21.7	689.5	21.7	672.8	21.7	Pereira et al., 2012b	Stephan et al., 2018	694.2	10.85	103.181		603.6	8.65	113.416
ETZ-32	D9	583.3	16.7	575.6	16.7	544.9	16.7	Pereira et al., 2012b	Stephan et al., 2018	583.3	8.35	107.047		653	13.95	125.553

## Sheet: OMZ_ISOPLOTR_CSV
OM-200		ZD6		OGL 1	SNM 1		CTO-33	2A-OGL		ETZ-30	ETZ-32		All OMZ	ZONE 1	Ediacaran OMZ	Early Cambrian OMZ
353		2672		1864.9	789		2153.1	617.3		662.3	664.1		2672	CTO-33	2672	1864.9
383		3040		596.8	700		605	1879.1		539.2	602.7		3040	OGL 1	3040	596.8
385		518		789	582.7		619.1	2027.3		758.1	633.7		518	ETZ-30	518	789
388		2632		700	607.4		714.4	536		2387.6	719.6		2632	1864.9	2632	700
389		1906		2809.9	2662.2		602.7	611.5		597.5	755.3		1906	596.8	1906	2809.9
371		554		779.9	593.3		615	640.1		696.5	599.2		554	789	554	779.9
383		2364		582.7	3041.6		2121.6	560.9		684.9	584.5		2364	700	2364	582.7
376		3292		607.4	553.2		1869.6	600.9		632.6	770.2		3292	2809.9	3292	607.4
383		2110		2662.2	550.2		532	580.3		604.8	611.5		2110	779.9	2110	2662.2
361		540		593.3	1923.8		773.6	573.8		601.2	808.4		540	582.7	540	593.3
362		1998		747.8	593.3		563.9	1876.4		551.5	723.1		1998	607.4	1998	747.8
387		2136		2089	540.1		712.1	627.9		615.6	711.4		2136	2662.2	2136	2089
381		541		1882.2	614.4		613.8	589.7		679.7	590		541	593.3	541	1882.2
388		1862		567.4	566.2		617.3	782.7		660.5	681.5		1862	747.8	1862	567.4
362		591		3041.6	634.3		637.2	640.7		552.1	590.3		591	2089	591	3041.6
373		571		1886.9	2082.2		610.9	556.4		678	599.2		571	1882.2	571	1886.9
369		597		553.2	544.3		2008.5	615		600	664.8		597	567.4	597	553.2
370		1902		550.2	566.2		552.7	1883.8		2389	761.6		1902	3041.6	1902	550.2
394		609		1923.8	826		637.8	650.1		538.8	665.5		609	1886.9	609	1923.8
379		572		2179.9	944		2056.1	598		3085.7	627.9		572	553.2	572	2179.9
375				593.3	555.5		560	585.6		591.1	579.3		1864.9	550.2	789	593.3
353				1934.4	554.9		2056.8	469.2		544.3	728.3		596.8	1923.8	700	1934.4
355				540.1	547.8		2038.2	590.9		684.4	2068.5		789	2179.9	582.7	540.1
375				2028	534.8		607.4	634.3		2075.4	1968.6		700	593.3	607.4	2028
370				2106.6	635.5		717.9	798.1		668.1	918.9		2809.9	1934.4	2662.2	2106.6
359				614.4	578		2209	639		565.6	655.3		779.9	540.1	593.3	614.4
391				2181.2	566.8		584.5			630.8	2472.8		582.7	2028	3041.6	2181.2
385				566.2	552		604.4			561.4	676.8		607.4	2106.6	553.2	566.2
377				634.3	549.6					2389	617.9		2662.2	614.4	550.2	634.3
366				651.2	573.8					2560.8	543.8		593.3	2181.2	1923.8	651.2
402				2082.2						695.9	651.8		747.8	566.2	593.3	2082.2
360				2026.6						2044.9	723.7		2089	634.3	540.1	2026.6
372				575.6						2714.3	593.5		1882.2	651.2	614.4	575.6
365				544.3						764.4	812.9		567.4	2082.2	566.2	544.3
399				566.2						3257.5	667.6		3041.6	2026.6	634.3	566.2
383				622						649.5	632.8		1886.9	575.6	2082.2	622
391				593.3						2466.5	762.7		553.2	544.3	544.3	593.3
391				826						599	1990.7		550.2	566.2	566.2	826
380				2035.1						2927.8	2082.9		1923.8	622	826	2035.1
350				1770.2						649.5	664.6		2179.9	593.3	944	1770.2
365				2137.2						640.7	602.7		593.3	826	555.5	2137.2
358				923.3						2721.4	688.4		1934.4	2035.1	554.9	923.3
386				944						604.4	618.5		540.1	1770.2	547.8	944
379				555.5						2118.6	782.6		2028	2137.2	534.8	555.5
				609.1						2909.4	544.2		2106.6	923.3	635.5	609.1
				2046.3						553.5	595		614.4	944	578	2046.3
				554.9						737.5	1855.4		2181.2	555.5	566.8	554.9
				547.8						586.8	682.6		566.2	609.1	552	547.8
				534.8						614.1	614.4		634.3	2046.3	549.6	534.8
				635.5						551.8	714.4		651.2	554.9	573.8	635.5
				578						2060.2	744.9		2082.2	547.8	2153.1	578
				566.8						549.7	614.4		2026.6	534.8	605	566.8
				552						2089	767.3		575.6	635.5	619.1	552
				549.6						600.7	672.2		544.3	578	714.4	549.6
				580.3						621.4	893.7		566.2	566.8	602.7	580.3
				573.8						540	585		622	552	615	573.8
				620.9						591.7	888.1		593.3	549.6	2121.6	620.9
										744.9	2381.2		826	580.3	1869.6	617.3
										2124	753.5		2035.1	573.8	532	1879.1
										548.6	625.1		1770.2	620.9	773.6	2027.3
										2089	595.6		2137.2	2153.1	563.9	536
										620.3	1778.6		923.3	605	712.1	611.5
										2099.9	688.4		944	619.1	613.8	640.1
										693.6	742.1		555.5	714.4	617.3	560.9
										580.4	649.6		609.1	602.7	637.2	600.9
										606.8	610.3		2046.3	615	610.9	580.3
										2894.7	751.8		554.9	2121.6	2008.5	573.8
										617.3	1837.3		547.8	1869.6	552.7	1876.4
										556.4	717.3		534.8	532	637.8	627.9
										673.3	2501.9		635.5	773.6	2056.1	589.7
										556	645.4		578	563.9	560	782.7
										634.3	574.2		566.8	712.1	2056.8	640.7
										553.5	2146.3		552	613.8	2038.2	556.4
										575	639		549.6	617.3	607.4	615
										555.5	639.6		580.3	637.2	717.9	1883.8
										560.7	682		573.8	610.9	2209	650.1
											622.6		620.9	2008.5	584.5	598
											687.3		2153.1	552.7	604.4	585.6
											684.6		605	637.8	664.1	469.2
											591.6		619.1	2056.1	602.7	590.9
											664		714.4	560	633.7	634.3
											825.4		602.7	2056.8	719.6	798.1
											594.5		615	2038.2	755.3	639
											824		2121.6	607.4	599.2	662.3
											2129.3		1869.6	717.9	584.5	539.2
											694.2		532	2209	770.2	758.1
											646.9		773.6	584.5	611.5	2387.6
											892.5		563.9	604.4	808.4	597.5
											740.1		712.1	662.3	723.1	696.5
											702.3		613.8	539.2	711.4	684.9
											763.3		617.3	758.1	590	632.6
											946.2		637.2	2387.6	681.5	604.8
											636.1		610.9	597.5	590.3	601.2
											682.6		2008.5	696.5	599.2	551.5
											583.3		552.7	684.9	664.8	615.6
											612.1		637.8	632.6	761.6	679.7
											593.3		2056.1	604.8	665.5	660.5
											737.5		560	601.2	627.9	552.1
											600.5		2056.8	551.5	579.3	678
											651.9		2038.2	615.6	728.3	600
											701.1		607.4	679.7	2068.5	2389
													717.9	660.5	1968.6	538.8
													2209	552.1	918.9	3085.7
													584.5	678	655.3	591.1
													604.4	600	2472.8	544.3
													617.3	2389	676.8	684.4
													1879.1	538.8	617.9	2075.4
													2027.3	3085.7	543.8	668.1
													536	591.1	651.8	565.6
													611.5	544.3	723.7	630.8
													640.1	684.4	593.5	561.4
													560.9	2075.4	812.9	2389
													600.9	668.1	667.6	2560.8
													580.3	565.6	632.8	695.9
													573.8	630.8	762.7	2044.9
													1876.4	561.4	1990.7	2714.3
													627.9	2389	2082.9	764.4
													589.7	2560.8	664.6	3257.5
													782.7	695.9	602.7	649.5
													640.7	2044.9	688.4	2466.5
													556.4	2714.3	618.5	599
													615	764.4	782.6	2927.8
													1883.8	3257.5	544.2	649.5
													650.1	649.5	595	640.7
													598	2466.5	1855.4	2721.4
													585.6	599	682.6	604.4
													469.2	2927.8	614.4	2118.6
													590.9	649.5	714.4	2909.4
													634.3	640.7	744.9	553.5
													798.1	2721.4	614.4	737.5
													639	604.4	767.3	586.8
													662.3	2118.6	672.2	614.1
													539.2	2909.4	893.7	551.8
													758.1	553.5	585	2060.2
													2387.6	737.5	888.1	549.7
													597.5	586.8	2381.2	2089
													696.5	614.1	753.5	600.7
													684.9	551.8	625.1	621.4
													632.6	2060.2	595.6	540
													604.8	549.7	1778.6	591.7
													601.2	2089	688.4	744.9
													551.5	600.7	742.1	2124
													615.6	621.4	649.6	548.6
													679.7	540	610.3	2089
													660.5	591.7	751.8	620.3
													552.1	744.9	1837.3	2099.9
													678	2124	717.3	693.6
													600	548.6	2501.9	580.4
													2389	2089	645.4	606.8
													538.8	620.3	574.2	2894.7
													3085.7	2099.9	2146.3	617.3
													591.1	693.6	639	556.4
													544.3	580.4	639.6	673.3
													684.4	606.8	682	556
													2075.4	2894.7	622.6	634.3
													668.1	617.3	687.3	553.5
													565.6	556.4	684.6	575
													630.8	673.3	591.6	555.5
													561.4	556	664	560.7
													2389	634.3	825.4
													2560.8	553.5	594.5
													695.9	575	824
													2044.9	555.5	2129.3
													2714.3	560.7	694.2
													764.4		646.9
													3257.5		892.5
													649.5		740.1
													2466.5		702.3
													599		763.3
													2927.8		946.2
													649.5		636.1
													640.7		682.6
													2721.4		583.3
													604.4		612.1
													2118.6		593.3
													2909.4		737.5
													553.5		600.5
													737.5		651.9
													586.8		701.1
													614.1
													551.8
													2060.2
													549.7
													2089
													600.7
													621.4
													540
													591.7
													744.9
													2124
													548.6
													2089
													620.3
													2099.9
													693.6
													580.4
													606.8
													2894.7
													617.3
													556.4
													673.3
													556
													634.3
													553.5
													575
													555.5
													560.7
													664.1
													602.7
													633.7
													719.6
													755.3
													599.2
													584.5
													770.2
													611.5
													808.4
													723.1
													711.4
													590
													681.5
													590.3
													599.2
													664.8
													761.6
													665.5
													627.9
													579.3
													728.3
													2068.5
													1968.6
													918.9
													655.3
													2472.8
													676.8
													617.9
													543.8
													651.8
													723.7
													593.5
													812.9
													667.6
													632.8
													762.7
													1990.7
													2082.9
													664.6
													602.7
													688.4
													618.5
													782.6
													544.2
													595
													1855.4
													682.6
													614.4
													714.4
													744.9
													614.4
													767.3
													672.2
													893.7
													585
													888.1
													2381.2
													753.5
													625.1
													595.6
													1778.6
													688.4
													742.1
													649.6
													610.3
													751.8
													1837.3
													717.3
													2501.9
													645.4
													574.2
													2146.3
													639
													639.6
													682
													622.6
													687.3
													684.6
													591.6
													664
													825.4
													594.5
													824
													2129.3
													694.2
													646.9
													892.5
													740.1
													702.3
													763.3
													946.2
													636.1
													682.6
													583.3
													612.1
													593.3
													737.5
													600.5
													651.9
													701.1

## Sheet: CIZ
SAMPLE	GRAIN	Age_238U	Err_238U	Age_235U	Err_235U	Age_206Pb	Err_206Pb	ORIGINAL REF	REFERENCE	SELECTED	1S	CONC%	TO ISOPLOT-R	AGE	1S	CONC%
														MS	Gzhelian
MS	MS-01	777	30	767	26	739	42	Dinis, et al., 2012	Puetz et al., 2018	777	15	105.142		586	11	55.4924
MS	MS-02	605	24	606	20	612	38	Dinis, et al., 2012	Puetz et al., 2018	605	12	98.8562		378	8	59.7156
MS	MS-03	641	24	624	22	561	40	Dinis, et al., 2012	Puetz et al., 2018	641	12	114.26		777	29	60
MS	MS-04	1021	42	1008	32	981	38	Dinis, et al., 2012	Puetz et al., 2018	981	19	104.077		1810	21	61.4365
MS	MS-05	1688	72	1756	42	1838	20	Dinis, et al., 2012	Puetz et al., 2018	1838	10	91.839		1864	8	71.1373
MS	MS-06	1637	78	1709	48	1798	38	Dinis, et al., 2012	Puetz et al., 2018	1798	19	91.0456		2570	7	75.1751
MS	MS-07	664	30	671	28	695	64	Dinis, et al., 2012	Puetz et al., 2018	664	15	95.5396		538	8	83.0247
MS	MS-08	663	30	654	28	624	60	Dinis, et al., 2012	Puetz et al., 2018	663	15	106.25		2527	43	86.3474
MS	MS-09	742	32	740	30	734	64	Dinis, et al., 2012	Puetz et al., 2018	742	16	101.09		345	8	86.6834
MS	MS-10	622	28	634	28	680	70	Dinis, et al., 2012	Puetz et al., 2018	622	14	91.4706		2359	22	87.1556
MS	MS-100	1047	36	1054	26	1068	24	Dinis, et al., 2012	Puetz et al., 2018	1068	12	98.0337		1753	7	87.5642
MS	MS-101	430	14	433	12	448	26	Dinis, et al., 2012	Puetz et al., 2018	430	7	95.9821		951	21	88.1372
MS	MS-102	998	34	1005	26	1021	26	Dinis, et al., 2012	Puetz et al., 2018	998	17	97.7473		1850	6	88.7027
MS	MS-11	643	30	633	26	595	64	Dinis, et al., 2012	Puetz et al., 2018	643	15	108.067		2590	28	88.8031
MS	MS-12	648	30	654	28	675	64	Dinis, et al., 2012	Puetz et al., 2018	648	15	96		470	4	89.6947
MS	MS-13	919	44	946	38	1009	66	Dinis, et al., 2012	Puetz et al., 2018	919	22	91.0803		1789	6	90.1062
MS	MS-14	345	16	351	16	398	68	Dinis, et al., 2012	Puetz et al., 2018	345	8	86.6834		1798	19	91.0456
MS	MS-15	2182	146	2365	86	2527	86	Dinis, et al., 2012	Puetz et al., 2018	2527	43	86.3474		919	22	91.0803
MS	MS-16	951	42	990	36	1079	60	Dinis, et al., 2012	Puetz et al., 2018	951	21	88.1372		622	14	91.4706
MS	MS-17	1036	50	1051	42	1083	64	Dinis, et al., 2012	Puetz et al., 2018	1083	32	95.6602		2532	26	91.5087
MS	MS-20	680	32	669	30	633	66	Dinis, et al., 2012	Puetz et al., 2018	680	16	107.425		2030	23	91.6256
MS	MS-21	378	16	416	18	633	64	Dinis, et al., 2012	Puetz et al., 2018	378	8	59.7156		1838	10	91.839
MS	MS-22	929	44	936	38	951	72	Dinis, et al., 2012	Puetz et al., 2018	929	22	97.6866		2490	14	92.5301
MS	MS-23	628	30	617	28	578	68	Dinis, et al., 2012	Puetz et al., 2018	628	15	108.651		534	3	92.5477
MS	MS-24	1024	16	1027	18	1032	40	Dinis, et al., 2012	Puetz et al., 2018	1032	20	99.2248		1843	6	93.1091
MS	MS-26	2317	54	2433	38	2532	52	Dinis, et al., 2012	Puetz et al., 2018	2532	26	91.5087		644	6	93.1983
MS	MS-27	1860	38	1941	30	2030	46	Dinis, et al., 2012	Puetz et al., 2018	2030	23	91.6256		2603	7	93.3538
MS	MS-28	1112	46	1375	38	1810	42	Dinis, et al., 2012	Puetz et al., 2018	1810	21	61.4365		788	10	93.5867
MS	MS-29	586	22	692	22	1056	42	Dinis, et al., 2012	Puetz et al., 2018	586	11	55.4924		2853	9	94.0063
MS	MS-30	619	12	619	14	620	42	Dinis, et al., 2012	Puetz et al., 2018	619	6	99.8387		1931	5	94.1999
MS	MS-31	2300	54	2458	42	2590	56	Dinis, et al., 2012	Puetz et al., 2018	2590	28	88.8031		1068	13	94.7566
MS	MS-32	453	10	454	10	457	38	Dinis, et al., 2012	Puetz et al., 2018	453	5	99.1247		601	7	94.795
MS	MS-33	461	10	459	10	447	36	Dinis, et al., 2012	Puetz et al., 2018	461	5	103.132		632	8	94.8949
MS	MS-34	622	10	621	12	616	46	Dinis, et al., 2012	Puetz et al., 2018	622	5	100.974		905	7	95.163
MS	MS-35	786	14	790	16	800	48	Dinis, et al., 2012	Puetz et al., 2018	786	7	98.25		971	7	95.2895
MS	MS-36	1037	18	1041	20	1050	44	Dinis, et al., 2012	Puetz et al., 2018	1050	22	98.7619		664	15	95.5396
MS	MS-37	637	10	635	14	627	46	Dinis, et al., 2012	Puetz et al., 2018	637	5	101.595		1083	32	95.6602
MS	MS-39	2056	76	2211	46	2359	44	Dinis, et al., 2012	Puetz et al., 2018	2359	22	87.1556		614	4	95.7878
MS	MS-40	1535	28	1629	18	1753	14	Dinis, et al., 2012	Puetz et al., 2018	1753	7	87.5642		927	14	95.8635
MS	MS-41	1819	28	1872	16	1931	10	Dinis, et al., 2012	Puetz et al., 2018	1931	5	94.1999		430	7	95.9821
MS	MS-42	534	6	542	6	577	12	Dinis, et al., 2012	Puetz et al., 2018	534	3	92.5477		648	15	96
MS	MS-43	1326	28	1548	20	1864	16	Dinis, et al., 2012	Puetz et al., 2018	1864	8	71.1373		1954	6	96.6735
MS	MS-44	777	58	925	58	1295	100	Dinis, et al., 2012	Puetz et al., 2018	777	29	60		2026	6	96.693
MS	MS-45	1612	28	1690	16	1789	12	Dinis, et al., 2012	Puetz et al., 2018	1789	6	90.1062		987	7	97.3373
MS	MS-46	1641	28	1735	18	1850	12	Dinis, et al., 2012	Puetz et al., 2018	1850	6	88.7027		362	2	97.5741
MS	MS-47	571	8	573	8	581	18	Dinis, et al., 2012	Puetz et al., 2018	571	4	98.2788		497	4	97.6424
MS	MS-48	1889	34	1920	18	1954	12	Dinis, et al., 2012	Puetz et al., 2018	1954	6	96.6735		929	22	97.6866
MS	MS-49	644	12	654	10	691	16	Dinis, et al., 2012	Puetz et al., 2018	644	6	93.1983		994	5	97.7384
MS	MS-50	1959	32	1992	18	2026	12	Dinis, et al., 2012	Puetz et al., 2018	2026	6	96.693		998	17	97.7473
MS	MS-51	621	8	620	6	618	14	Dinis, et al., 2012	Puetz et al., 2018	621	4	100.485		2070	6	97.8261
MS	MS-52	604	10	606	8	612	16	Dinis, et al., 2012	Puetz et al., 2018	604	5	98.6928		1068	12	98.0337
MS	MS-53	905	14	919	12	951	14	Dinis, et al., 2012	Puetz et al., 2018	905	7	95.163		641	4	98.1623
MS	MS-54	972	12	964	10	948	16	Dinis, et al., 2012	Puetz et al., 2018	972	6	102.532		786	7	98.25
MS	MS-55	2025	30	2048	16	2070	12	Dinis, et al., 2012	Puetz et al., 2018	2070	6	97.8261		571	4	98.2788
MS	MS-56	1716	32	1774	18	1843	12	Dinis, et al., 2012	Puetz et al., 2018	1843	6	93.1091		2713	24	98.3413
MS	MS-57	614	8	620	8	641	18	Dinis, et al., 2012	Puetz et al., 2018	614	4	95.7878		660	10	98.6547
MS	MS-58	986	14	988	12	992	22	Dinis, et al., 2012	Puetz et al., 2018	986	7	99.3952		516	8	98.6616
MS	MS-59	654	10	654	8	653	12	Dinis, et al., 2012	Puetz et al., 2018	654	5	100.153		604	5	98.6928
MS	MS-60	1932	40	2259	24	2570	14	Dinis, et al., 2012	Puetz et al., 2018	2570	7	75.1751		1050	22	98.7619
MS	MS-61	927	28	939	20	967	18	Dinis, et al., 2012	Puetz et al., 2018	927	14	95.8635		883	15	98.7696
MS	MS-62	971	14	986	10	1019	12	Dinis, et al., 2012	Puetz et al., 2018	971	7	95.2895		681	3	98.8389
MS	MS-63	933	12	935	10	939	18	Dinis, et al., 2012	Puetz et al., 2018	933	6	99.361		605	12	98.8562
MS	MS-64	513	8	508	8	486	20	Dinis, et al., 2012	Puetz et al., 2018	513	4	105.556		453	5	99.1247
MS	MS-65	1018	14	1017	10	1016	14	Dinis, et al., 2012	Puetz et al., 2018	1016	7	100.197		1032	20	99.2248
MS	MS-67	995	14	996	10	997	12	Dinis, et al., 2012	Puetz et al., 2018	995	7	99.7994		933	6	99.361
MS	MS-68	2430	44	2526	22	2603	14	Dinis, et al., 2012	Puetz et al., 2018	2603	7	93.3538		986	7	99.3952
MS	MS-69	715	10	711	8	699	12	Dinis, et al., 2012	Puetz et al., 2018	715	5	102.289		2047	19	99.4626
MS	MS-70	2682	62	2781	28	2853	18	Dinis, et al., 2012	Puetz et al., 2018	2853	9	94.0063		995	7	99.7994
MS	MS-71	470	8	479	6	524	16	Dinis, et al., 2012	Puetz et al., 2018	470	4	89.6947		619	6	99.8387
MS	MS-72	572	8	566	8	540	18	Dinis, et al., 2012	Puetz et al., 2018	572	4	105.926		649	8	99.8462
MS	MS-73	737	10	735	8	728	12	Dinis, et al., 2012	Puetz et al., 2018	737	5	101.236		654	5	100.153
MS	MS-74	2668	98	2694	50	2713	48	Dinis, et al., 2012	Puetz et al., 2018	2713	24	98.3413		636	7	100.157
MS	MS-75	1705	26	1700	16	1695	14	Dinis, et al., 2012	Puetz et al., 2018	1695	7	100.59		1016	7	100.197
MS	MS-76	2304	64	2404	34	2490	28	Dinis, et al., 2012	Puetz et al., 2018	2490	14	92.5301		621	4	100.485
MS	MS-77	632	16	640	12	666	20	Dinis, et al., 2012	Puetz et al., 2018	632	8	94.8949		1695	7	100.59
MS	MS-78	1045	16	1039	12	1026	12	Dinis, et al., 2012	Puetz et al., 2018	1026	6	101.852		975	7	100.827
MS	MS-79	975	14	972	12	967	14	Dinis, et al., 2012	Puetz et al., 2018	975	7	100.827		622	5	100.974
MS	MS-80	613	10	609	10	593	34	Dinis, et al., 2012	Puetz et al., 2018	613	5	103.373		742	16	101.09
MS	MS-81	636	14	635	12	635	16	Dinis, et al., 2012	Puetz et al., 2018	636	7	100.157		737	5	101.236
MS	MS-82	987	14	995	10	1014	12	Dinis, et al., 2012	Puetz et al., 2018	987	7	97.3373		497	2	101.429
MS	MS-83	497	8	499	6	509	16	Dinis, et al., 2012	Puetz et al., 2018	497	4	97.6424		637	5	101.595
MS	MS-84	641	8	643	10	653	36	Dinis, et al., 2012	Puetz et al., 2018	641	4	98.1623		1026	6	101.852
MS	MS-85	994	10	1001	14	1017	34	Dinis, et al., 2012	Puetz et al., 2018	994	5	97.7384		715	5	102.289
MS	MS-86	681	6	683	10	689	34	Dinis, et al., 2012	Puetz et al., 2018	681	3	98.8389		972	6	102.532
MS	MS-87	497	4	496	8	490	36	Dinis, et al., 2012	Puetz et al., 2018	497	2	101.429		461	5	103.132
MS	MS-89	362	4	363	6	371	40	Dinis, et al., 2012	Puetz et al., 2018	362	2	97.5741		613	5	103.373
MS	MS-90	2036	30	2041	24	2047	38	Dinis, et al., 2012	Puetz et al., 2018	2047	19	99.4626		981	19	104.077
MS	MS-91	516	16	517	14	523	24	Dinis, et al., 2012	Puetz et al., 2018	516	8	98.6616		777	15	105.142
MS	MS-92	601	14	608	12	634	24	Dinis, et al., 2012	Puetz et al., 2018	601	7	94.795		513	4	105.556
MS	MS-93	649	16	649	14	650	22	Dinis, et al., 2012	Puetz et al., 2018	649	8	99.8462		572	4	105.926
MS	MS-94	788	20	802	16	842	26	Dinis, et al., 2012	Puetz et al., 2018	788	10	93.5867		663	15	106.25
MS	MS-96	1012	30	1030	22	1068	26	Dinis, et al., 2012	Puetz et al., 2018	1068	13	94.7566		680	16	107.425
MS	MS-97	538	16	559	14	648	24	Dinis, et al., 2012	Puetz et al., 2018	538	8	83.0247		643	15	108.067
MS	MS-98	883	30	886	22	894	26	Dinis, et al., 2012	Puetz et al., 2018	883	15	98.7696		628	15	108.651
MS	MS-99	660	20	662	16	669	24	Dinis, et al., 2012	Puetz et al., 2018	660	10	98.6547		641	12	114.26
														SC69	Gzhelian
SC69	SC69-001	615	20	611	22	594	70	Dinis, et al., 2012	Puetz et al., 2018	615	10	103.535		540	6	77.0328
SC69	SC69-002	634	22	659	20	745	28	Dinis, et al., 2012	Puetz et al., 2018	634	11	85.1007		2603	22	80.9066
SC69	SC69-003	876	24	894	20	937	40	Dinis, et al., 2012	Puetz et al., 2018	876	12	93.4899		2136	14	81.5075
SC69	SC69-004	599	14	596	14	582	42	Dinis, et al., 2012	Puetz et al., 2018	599	7	102.921		696	11	83.2536
SC69	SC69-005	1927	58	1972	38	2019	44	Dinis, et al., 2012	Puetz et al., 2018	2019	22	95.4433		454	34	83.4559
SC69	SC69-006	593	14	585	14	554	40	Dinis, et al., 2012	Puetz et al., 2018	593	7	107.04		527	6	84.8631
SC69	SC69-007	609	18	604	16	586	44	Dinis, et al., 2012	Puetz et al., 2018	609	9	103.925		634	11	85.1007
SC69	SC69-008	556	14	533	14	434	44	Dinis, et al., 2012	Puetz et al., 2018	556	7	128.111		2035	15	87.8624
SC69	SC69-009	558	14	564	14	587	38	Dinis, et al., 2012	Puetz et al., 2018	558	7	95.0596		800	17	90.4977
SC69	SC69-010	800	34	823	28	884	46	Dinis, et al., 2012	Puetz et al., 2018	800	17	90.4977		1464	9	90.5055
SC69	SC69-011	696	22	730	22	836	46	Dinis, et al., 2012	Puetz et al., 2018	696	11	83.2536		608	7	90.611
SC69	SC69-012	915	24	923	22	943	42	Dinis, et al., 2012	Puetz et al., 2018	915	12	97.0308		947	8	91.3211
SC69	SC69-014	2023	78	2079	48	2136	50	Dinis, et al., 2012	Puetz et al., 2018	2136	25	94.7097		658	6	91.3889
SC69	SC69-015	975	24	976	22	980	40	Dinis, et al., 2012	Puetz et al., 2018	975	12	99.4898		623	5	91.6176
SC69	SC69-016	620	16	628	16	657	46	Dinis, et al., 2012	Puetz et al., 2018	620	8	94.3683		565	14	92.0195
SC69	SC69-017	947	16	975	16	1037	30	Dinis, et al., 2012	Puetz et al., 2018	947	8	91.3211		919	23	92.7346
SC69	SC69-018	571	10	574	10	585	26	Dinis, et al., 2012	Puetz et al., 2018	571	5	97.6068		1422	11	92.9677
SC69	SC69-019	1741	56	1928	36	2136	28	Dinis, et al., 2012	Puetz et al., 2018	2136	14	81.5075		554	4	93.266
SC69	SC69-020	598	10	596	10	589	30	Dinis, et al., 2012	Puetz et al., 2018	598	5	101.528		559	6	93.3222
SC69	SC69-021	665	10	662	12	651	30	Dinis, et al., 2012	Puetz et al., 2018	665	5	102.151		876	12	93.4899
SC69	SC69-022	1010	20	1017	18	1032	28	Dinis, et al., 2012	Puetz et al., 2018	1032	14	97.8682		577	13	93.517
SC69	SC69-023	1977	44	2005	28	2033	30	Dinis, et al., 2012	Puetz et al., 2018	2033	15	97.2455		609	7	93.6923
SC69	SC69-024	948	22	960	18	986	24	Dinis, et al., 2012	Puetz et al., 2018	948	11	96.146		587	5	94.2215
SC69	SC69-025	527	12	545	12	621	26	Dinis, et al., 2012	Puetz et al., 2018	527	6	84.8631		620	8	94.3683
SC69	SC69-027	628	10	629	12	633	34	Dinis, et al., 2012	Puetz et al., 2018	628	5	99.2101		839	9	94.6953
SC69	SC69-028	622	10	627	10	646	28	Dinis, et al., 2012	Puetz et al., 2018	622	5	96.2848		2136	25	94.7097
SC69	SC69-029	554	8	562	10	594	36	Dinis, et al., 2012	Puetz et al., 2018	554	4	93.266		878	22	94.8164
SC69	SC69-030	620	10	625	10	642	28	Dinis, et al., 2012	Puetz et al., 2018	620	5	96.5732		562	14	94.9324
SC69	SC69-031	610	10	616	10	640	30	Dinis, et al., 2012	Puetz et al., 2018	610	5	95.3125		558	7	95.0596
SC69	SC69-032	584	16	581	36	570	170	Dinis, et al., 2012	Puetz et al., 2018	584	8	102.456		2116	22	95.2268
SC69	SC69-033	686	10	687	12	692	32	Dinis, et al., 2012	Puetz et al., 2018	686	5	99.1329		610	5	95.3125
SC69	SC69-034	2017	44	2066	28	2116	34	Dinis, et al., 2012	Puetz et al., 2018	2116	17	95.3214		2116	17	95.3214
SC69	SC69-035	586	10	591	10	612	32	Dinis, et al., 2012	Puetz et al., 2018	586	5	95.7516		2019	22	95.4433
SC69	SC69-037	623	10	635	10	680	28	Dinis, et al., 2012	Puetz et al., 2018	623	5	91.6176		827	11	95.6069
SC69	SC69-038	1008	18	1020	16	1046	28	Dinis, et al., 2012	Puetz et al., 2018	1046	14	96.3671		586	5	95.7516
SC69	SC69-039	1827	34	1858	22	1894	28	Dinis, et al., 2012	Puetz et al., 2018	1894	14	96.4625		617	5	95.8075
SC69	SC69-041	1788	30	1905	22	2035	30	Dinis, et al., 2012	Puetz et al., 2018	2035	15	87.8624		1874	21	96.0512
SC69	SC69-042	584	10	587	10	598	30	Dinis, et al., 2012	Puetz et al., 2018	584	5	97.6589		948	11	96.146
SC69	SC69-043	2224	44	2261	28	2294	32	Dinis, et al., 2012	Puetz et al., 2018	2294	16	96.9486		585	6	96.2171
SC69	SC69-044	878	44	892	34	926	38	Dinis, et al., 2012	Puetz et al., 2018	878	22	94.8164		958	12	96.2814
SC69	SC69-045	562	28	568	24	592	38	Dinis, et al., 2012	Puetz et al., 2018	562	14	94.9324		622	5	96.2848
SC69	SC69-046	2106	126	2368	70	2603	44	Dinis, et al., 2012	Puetz et al., 2018	2603	22	80.9066		1046	14	96.3671
SC69	SC69-047	629	34	620	56	587	232	Dinis, et al., 2012	Puetz et al., 2018	629	17	107.155		1894	14	96.4625
SC69	SC69-048	616	28	617	24	620	38	Dinis, et al., 2012	Puetz et al., 2018	616	14	99.3548		620	5	96.5732
SC69	SC69-049	1007	48	1011	36	1022	40	Dinis, et al., 2012	Puetz et al., 2018	1022	20	98.5323		2294	16	96.9486
SC69	SC69-050	577	26	585	22	617	36	Dinis, et al., 2012	Puetz et al., 2018	577	13	93.517		915	12	97.0308
SC69	SC69-051	614	30	614	24	615	42	Dinis, et al., 2012	Puetz et al., 2018	614	15	99.8374		2033	15	97.2455
SC69	SC69-052	571	28	572	26	573	60	Dinis, et al., 2012	Puetz et al., 2018	571	14	99.651		971	24	97.2946
SC69	SC69-053	1800	96	1835	56	1874	42	Dinis, et al., 2012	Puetz et al., 2018	1874	21	96.0512		571	5	97.6068
SC69	SC69-054	2015	110	2065	62	2116	44	Dinis, et al., 2012	Puetz et al., 2018	2116	22	95.2268		584	5	97.6589
SC69	SC69-055	971	48	979	36	998	38	Dinis, et al., 2012	Puetz et al., 2018	971	24	97.2946		1032	14	97.8682
SC69	SC69-056	565	28	575	24	614	42	Dinis, et al., 2012	Puetz et al., 2018	565	14	92.0195		614	14	98.3974
SC69	SC69-057	614	28	616	24	624	44	Dinis, et al., 2012	Puetz et al., 2018	614	14	98.3974		1022	20	98.5323
SC69	SC69-059	919	46	941	36	991	44	Dinis, et al., 2012	Puetz et al., 2018	919	23	92.7346		863	11	98.8545
SC69	SC69-060	793	36	794	30	794	56	Dinis, et al., 2012	Puetz et al., 2018	793	18	99.8741		608	6	98.8618
SC69	SC69-061	658	12	672	10	720	20	Dinis, et al., 2012	Puetz et al., 2018	658	6	91.3889		686	5	99.1329
SC69	SC69-062	587	10	595	8	623	16	Dinis, et al., 2012	Puetz et al., 2018	587	5	94.2215		628	5	99.2101
SC69	SC69-063	617	10	623	8	644	14	Dinis, et al., 2012	Puetz et al., 2018	617	5	95.8075		670	6	99.2593
SC69	SC69-064	732	14	731	12	728	16	Dinis, et al., 2012	Puetz et al., 2018	732	7	100.549		616	14	99.3548
SC69	SC69-068	670	12	671	12	675	30	Dinis, et al., 2012	Puetz et al., 2018	670	6	99.2593		975	12	99.4898
SC69	SC69-069	609	14	618	20	650	78	Dinis, et al., 2012	Puetz et al., 2018	609	7	93.6923		571	14	99.651
SC69	SC69-070	559	12	567	10	599	16	Dinis, et al., 2012	Puetz et al., 2018	559	6	93.3222		614	15	99.8374
SC69	SC69-071	633	12	633	12	633	20	Dinis, et al., 2012	Puetz et al., 2018	633	6	100		793	18	99.8741
SC69	SC69-072	592	12	591	10	591	16	Dinis, et al., 2012	Puetz et al., 2018	592	6	100.169		633	6	100
SC69	SC69-073	622	14	617	12	598	24	Dinis, et al., 2012	Puetz et al., 2018	622	7	104.013		695	7	100.144
SC69	SC69-074	578	12	577	12	572	28	Dinis, et al., 2012	Puetz et al., 2018	578	6	101.049		642	6	100.156
SC69	SC69-075	1325	32	1379	22	1464	18	Dinis, et al., 2012	Puetz et al., 2018	1464	9	90.5055		622	8	100.161
SC69	SC69-076	863	22	866	16	873	18	Dinis, et al., 2012	Puetz et al., 2018	863	11	98.8545		592	6	100.169
SC69	SC69-077	695	14	695	12	694	22	Dinis, et al., 2012	Puetz et al., 2018	695	7	100.144		838	9	100.359
SC69	SC69-078	643	14	635	12	607	20	Dinis, et al., 2012	Puetz et al., 2018	643	7	105.931		969	11	100.519
SC69	SC69-079	454	68	469	60	544	84	Dinis, et al., 2012	Puetz et al., 2018	454	34	83.4559		732	7	100.549
SC69	SC69-080	642	12	642	12	641	28	Dinis, et al., 2012	Puetz et al., 2018	642	6	100.156		642	7	100.785
SC69	SC69-081	827	22	837	16	865	18	Dinis, et al., 2012	Puetz et al., 2018	827	11	95.6069		578	6	101.049
SC69	SC69-082	608	12	609	10	615	18	Dinis, et al., 2012	Puetz et al., 2018	608	6	98.8618		598	5	101.528
SC69	SC69-083	642	14	641	12	637	18	Dinis, et al., 2012	Puetz et al., 2018	642	7	100.785		559	6	101.636
SC69	SC69-084	958	24	970	18	995	20	Dinis, et al., 2012	Puetz et al., 2018	958	12	96.2814		642	7	101.905
SC69	SC69-085	540	12	572	14	701	42	Dinis, et al., 2012	Puetz et al., 2018	540	6	77.0328		665	5	102.151
SC69	SC69-087	576	12	573	10	562	18	Dinis, et al., 2012	Puetz et al., 2018	576	6	102.491		584	8	102.456
SC69	SC69-089	585	12	590	10	608	20	Dinis, et al., 2012	Puetz et al., 2018	585	6	96.2171		576	6	102.491
SC69	SC69-091	838	18	837	14	835	18	Dinis, et al., 2012	Puetz et al., 2018	838	9	100.359		599	7	102.921
SC69	SC69-092	559	12	557	12	550	28	Dinis, et al., 2012	Puetz et al., 2018	559	6	101.636		572	6	103.436
SC69	SC69-093	969	22	968	16	964	18	Dinis, et al., 2012	Puetz et al., 2018	969	11	100.519		615	10	103.535
SC69	SC69-094	608	14	622	16	671	54	Dinis, et al., 2012	Puetz et al., 2018	608	7	90.611		609	9	103.925
SC69	SC69-096	572	12	568	10	553	20	Dinis, et al., 2012	Puetz et al., 2018	572	6	103.436		622	7	104.013
SC69	SC69-098	839	18	852	16	886	24	Dinis, et al., 2012	Puetz et al., 2018	839	9	94.6953		671	8	105.669
SC69	SC69-100	1322	38	1361	26	1422	22	Dinis, et al., 2012	Puetz et al., 2018	1422	11	92.9677		643	7	105.931
SC69	SC69-101	642	14	640	12	630	20	Dinis, et al., 2012	Puetz et al., 2018	642	7	101.905		593	7	107.04
SC69	SC69-102	622	16	622	14	621	26	Dinis, et al., 2012	Puetz et al., 2018	622	8	100.161		629	17	107.155
SC69	SC69-104	671	16	663	12	635	18	Dinis, et al., 2012	Puetz et al., 2018	671	8	105.669		556	7	128.111
														SCB3	Gzhelian
SCB3	SCB3-001	2797	102	2900	46	2972	24	Dinis, et al., 2012	Puetz et al., 2018	2972	12	94.1117		1924	10	80.1455
SCB3	SCB3-002	2491	132	2753	72	2951	62	Dinis, et al., 2012	Puetz et al., 2018	2951	31	84.4121		2951	31	84.4121
SCB3	SCB3-003	586	12	586	12	585	20	Dinis, et al., 2012	Puetz et al., 2018	586	6	100.171		652	8	90.3047
SCB3	SCB3-005	928	22	932	18	942	18	Dinis, et al., 2012	Puetz et al., 2018	928	11	98.5138		858	11	91.7647
SCB3	SCB3-006	711	16	711	14	712	20	Dinis, et al., 2012	Puetz et al., 2018	711	8	99.8596		2453	12	92.1728
SCB3	SCB3-007	620	14	618	12	612	20	Dinis, et al., 2012	Puetz et al., 2018	620	7	101.307		2034	9	93.5103
SCB3	SCB3-010	1826	50	1880	30	1940	18	Dinis, et al., 2012	Puetz et al., 2018	1940	9	94.1237		1961	11	94.0337
SCB3	SCB3-011	1933	54	1950	30	1967	18	Dinis, et al., 2012	Puetz et al., 2018	1967	9	98.2715		2972	12	94.1117
SCB3	SCB3-012	2261	72	2363	36	2453	24	Dinis, et al., 2012	Puetz et al., 2018	2453	12	92.1728		1940	9	94.1237
SCB3	SCB3-013	858	22	880	18	935	24	Dinis, et al., 2012	Puetz et al., 2018	858	11	91.7647		1998	10	94.4444
SCB3	SCB3-014	364	10	364	8	362	20	Dinis, et al., 2012	Puetz et al., 2018	364	5	100.552		1854	11	95.4153
SCB3	SCB3-015	1542	48	1711	30	1924	20	Dinis, et al., 2012	Puetz et al., 2018	1924	10	80.1455		927	8	96.2617
SCB3	SCB3-016	645	16	642	14	632	28	Dinis, et al., 2012	Puetz et al., 2018	645	8	102.057		632	6	96.3415
SCB3	SCB3-017	628	16	632	14	645	22	Dinis, et al., 2012	Puetz et al., 2018	628	8	97.3643		628	8	97.3643
SCB3	SCB3-018	1467	38	1475	24	1486	20	Dinis, et al., 2012	Puetz et al., 2018	1486	10	98.7214		1967	9	98.2715
SCB3	SCB3-019	785	14	779	12	763	20	Dinis, et al., 2012	Puetz et al., 2018	785	7	102.883		697	6	98.4463
SCB3	SCB3-020	610	10	607	10	592	22	Dinis, et al., 2012	Puetz et al., 2018	610	5	103.041		843	8	98.4813
SCB3	SCB3-022	1902	46	1966	26	2034	18	Dinis, et al., 2012	Puetz et al., 2018	2034	9	93.5103		928	11	98.5138
SCB3	SCB3-023	685	12	685	10	682	16	Dinis, et al., 2012	Puetz et al., 2018	685	6	100.44		669	6	98.5272
SCB3	SCB3-026	1036	18	1032	14	1025	20	Dinis, et al., 2012	Puetz et al., 2018	1025	10	101.073		1486	10	98.7214
SCB3	SCB3-027	1887	44	1941	24	1998	20	Dinis, et al., 2012	Puetz et al., 2018	1998	10	94.4444		1021	10	98.8247
SCB3	SCB3-028	669	12	671	10	679	24	Dinis, et al., 2012	Puetz et al., 2018	669	6	98.5272		1041	11	98.8473
SCB3	SCB3-029	927	16	938	12	963	18	Dinis, et al., 2012	Puetz et al., 2018	927	8	96.2617		353	3	99.1573
SCB3	SCB3-030	697	12	700	10	708	20	Dinis, et al., 2012	Puetz et al., 2018	697	6	98.4463		572	6	99.4783
SCB3	SCB3-031	674	12	672	10	663	18	Dinis, et al., 2012	Puetz et al., 2018	674	6	101.659		711	8	99.8596
SCB3	SCB3-032	569	10	566	12	552	44	Dinis, et al., 2012	Puetz et al., 2018	569	5	103.08		586	6	100.171
SCB3	SCB3-034	843	16	847	12	856	18	Dinis, et al., 2012	Puetz et al., 2018	843	8	98.4813		1045	10	100.287
SCB3	SCB3-035	652	16	668	14	722	28	Dinis, et al., 2012	Puetz et al., 2018	652	8	90.3047		618	6	100.325
SCB3	SCB3-036	1048	20	1047	16	1045	20	Dinis, et al., 2012	Puetz et al., 2018	1045	10	100.287		685	6	100.44
SCB3	SCB3-037	632	12	638	12	656	24	Dinis, et al., 2012	Puetz et al., 2018	632	6	96.3415		364	5	100.552
SCB3	SCB3-038	1009	20	1013	16	1021	20	Dinis, et al., 2012	Puetz et al., 2018	1021	10	98.8247		302	3	100.667
SCB3	SCB3-039	302	6	302	6	300	30	Dinis, et al., 2012	Puetz et al., 2018	302	3	100.667		1025	10	101.073
SCB3	SCB3-040	328	6	325	6	308	22	Dinis, et al., 2012	Puetz et al., 2018	328	3	106.494		620	7	101.307
SCB3	SCB3-041	353	6	354	6	356	24	Dinis, et al., 2012	Puetz et al., 2018	353	3	99.1573		674	6	101.659
SCB3	SCB3-042	1769	44	1808	26	1854	22	Dinis, et al., 2012	Puetz et al., 2018	1854	11	95.4153		645	8	102.057
SCB3	SCB3-044	1029	22	1032	16	1041	22	Dinis, et al., 2012	Puetz et al., 2018	1041	11	98.8473		785	7	102.883
SCB3	SCB3-045	1844	46	1900	28	1961	22	Dinis, et al., 2012	Puetz et al., 2018	1961	11	94.0337		610	5	103.041
SCB3	SCB3-046	572	12	572	10	575	24	Dinis, et al., 2012	Puetz et al., 2018	572	6	99.4783		569	5	103.08
SCB3	SCB3-047	618	12	617	12	616	26	Dinis, et al., 2012	Puetz et al., 2018	618	6	100.325		328	3	106.494
														SCB7	Gzhelian
SCB7	SCB7-001	1893	56	1926	32	1961	20	Dinis, et al., 2012	Puetz et al., 2018	1961	10	96.5324		446	7	58.0729
SCB7	SCB7-002	635	14	627	14	600	34	Dinis, et al., 2012	Puetz et al., 2018	635	7	105.833		448	6	64.9275
SCB7	SCB7-002R	613	14	613	12	612	26	Dinis, et al., 2012	Puetz et al., 2018	613	7	100.163		387	5	66.1538
SCB7	SCB7-003	1294	34	1464	24	1720	20	Dinis, et al., 2012	Puetz et al., 2018	1720	10	75.2326		596	8	68.5846
SCB7	SCB7-004	2375	82	2490	42	2585	24	Dinis, et al., 2012	Puetz et al., 2018	2585	12	91.8762		425	9	69.5581
SCB7	SCB7-005	879	22	928	18	1045	20	Dinis, et al., 2012	Puetz et al., 2018	879	11	84.1148		1601	13	73.8289
SCB7	SCB7-006	972	24	975	18	982	22	Dinis, et al., 2012	Puetz et al., 2018	972	12	98.9817		471	7	73.9403
SCB7	SCB7-007	1501	36	1723	26	2004	26	Dinis, et al., 2012	Puetz et al., 2018	2004	13	74.9002		1543	25	74.3357
SCB7	SCB7-008	997	24	1005	16	1023	18	Dinis, et al., 2012	Puetz et al., 2018	997	12	97.4585		2004	13	74.9002
SCB7	SCB7-009	693	16	695	16	701	38	Dinis, et al., 2012	Puetz et al., 2018	693	8	98.8588		773	13	75.1946
SCB7	SCB7-011	585	14	581	12	566	24	Dinis, et al., 2012	Puetz et al., 2018	585	7	103.357		1720	10	75.2326
SCB7	SCB7-012	755	18	745	14	716	16	Dinis, et al., 2012	Puetz et al., 2018	755	9	105.447		621	8	76.2899
SCB7	SCB7-013	614	14	615	12	621	26	Dinis, et al., 2012	Puetz et al., 2018	614	7	98.8728		1815	27	76.4738
SCB7	SCB7-014	1800	52	1825	30	1855	20	Dinis, et al., 2012	Puetz et al., 2018	1855	10	97.035		552	9	78.7447
SCB7	SCB7-015	687	16	678	14	650	20	Dinis, et al., 2012	Puetz et al., 2018	687	8	105.692		1998	15	81.8318
SCB7	SCB7-016	629	14	657	14	753	22	Dinis, et al., 2012	Puetz et al., 2018	629	7	83.5325		595	10	81.8432
SCB7	SCB7-017	621	16	664	16	814	28	Dinis, et al., 2012	Puetz et al., 2018	621	8	76.2899		554	6	83.0585
SCB7	SCB7-018	563	14	558	12	536	28	Dinis, et al., 2012	Puetz et al., 2018	563	7	105.037		629	7	83.5325
SCB7	SCB7-019	1048	26	1042	18	1029	20	Dinis, et al., 2012	Puetz et al., 2018	1029	10	101.846		2471	11	84.0955
SCB7	SCB7-020	687	18	681	14	662	28	Dinis, et al., 2012	Puetz et al., 2018	687	9	103.776		879	11	84.1148
SCB7	SCB7-021	2355	84	2484	42	2591	24	Dinis, et al., 2012	Puetz et al., 2018	2591	12	90.8915		537	9	85.5096
SCB7	SCB7-022	919	24	929	18	954	22	Dinis, et al., 2012	Puetz et al., 2018	919	12	96.3312		2547	31	85.7872
SCB7	SCB7-023	613	16	606	12	577	22	Dinis, et al., 2012	Puetz et al., 2018	613	8	106.239		2398	9	87.1977
SCB7	SCB7-024	1007	28	1010	22	1016	32	Dinis, et al., 2012	Puetz et al., 2018	1016	16	99.1142		496	7	89.5307
SCB7	SCB7-026	532	14	542	12	585	22	Dinis, et al., 2012	Puetz et al., 2018	532	7	90.9402		354	4	90.0763
SCB7	SCB7-027	702	20	703	16	705	30	Dinis, et al., 2012	Puetz et al., 2018	702	10	99.5745		622	10	90.407
SCB7	SCB7-028	596	16	656	14	869	22	Dinis, et al., 2012	Puetz et al., 2018	596	8	68.5846		2166	15	90.8126
SCB7	SCB7-029	2078	78	2283	42	2471	22	Dinis, et al., 2012	Puetz et al., 2018	2471	11	84.0955		1104	16	90.8514
SCB7	SCB7-030	1182	30	1339	22	1601	26	Dinis, et al., 2012	Puetz et al., 2018	1601	13	73.8289		2591	12	90.8915
SCB7	SCB7-031	760	22	779	18	834	26	Dinis, et al., 2012	Puetz et al., 2018	760	11	91.1271		532	7	90.9402
SCB7	SCB7-032	707	20	701	16	682	24	Dinis, et al., 2012	Puetz et al., 2018	707	10	103.666		760	11	91.1271
SCB7	SCB7-033	975	28	1004	22	1066	24	Dinis, et al., 2012	Puetz et al., 2018	975	14	91.4634		975	14	91.4634
SCB7	SCB7-034	476	12	479	12	495	24	Dinis, et al., 2012	Puetz et al., 2018	476	6	96.1616		1503	10	91.7498
SCB7	SCB7-035	446	14	502	14	768	28	Dinis, et al., 2012	Puetz et al., 2018	446	7	58.0729		2585	12	91.8762
SCB7	SCB7-036	822	26	838	20	882	20	Dinis, et al., 2012	Puetz et al., 2018	822	13	93.1973		550	9	93.0626
SCB7	SCB7-038	723	24	721	20	715	28	Dinis, et al., 2012	Puetz et al., 2018	723	12	101.119		2617	13	93.1601
SCB7	SCB7-039	448	12	489	12	690	20	Dinis, et al., 2012	Puetz et al., 2018	448	6	64.9275		822	13	93.1973
SCB7	SCB7-040	574	18	567	16	540	28	Dinis, et al., 2012	Puetz et al., 2018	574	9	106.296		981	16	93.251
SCB7	SCB7-041	351	10	352	10	357	30	Dinis, et al., 2012	Puetz et al., 2018	351	5	98.3193		595	8	93.2602
SCB7	SCB7-042	824	26	821	20	812	28	Dinis, et al., 2012	Puetz et al., 2018	824	13	101.478		633	8	94.3368
SCB7	SCB7-043	363	12	362	10	352	28	Dinis, et al., 2012	Puetz et al., 2018	363	6	103.125		629	11	94.7289
SCB7	SCB7-044	586	18	583	16	572	26	Dinis, et al., 2012	Puetz et al., 2018	586	9	102.448		656	11	95.0725
SCB7	SCB7-045	357	12	359	10	373	30	Dinis, et al., 2012	Puetz et al., 2018	357	6	95.7105		649	8	95.5817
SCB7	SCB7-046	586	18	581	16	563	22	Dinis, et al., 2012	Puetz et al., 2018	586	9	104.085		357	6	95.7105
SCB7	SCB7-047	595	20	623	16	727	20	Dinis, et al., 2012	Puetz et al., 2018	595	10	81.8432		785	9	95.9658
SCB7	SCB7-048	1083	36	1093	26	1115	20	Dinis, et al., 2012	Puetz et al., 2018	1115	10	97.13		476	6	96.1616
SCB7	SCB7-049	594	18	591	16	576	22	Dinis, et al., 2012	Puetz et al., 2018	594	9	103.125		919	12	96.3312
SCB7	SCB7-050	981	32	979	24	975	28	Dinis, et al., 2012	Puetz et al., 2018	981	16	100.615		1961	10	96.5324
SCB7	SCB7-051	2438	114	2537	54	2617	26	Dinis, et al., 2012	Puetz et al., 2018	2617	13	93.1601		1048	24	96.5649
SCB7	SCB7-052	622	20	636	18	688	28	Dinis, et al., 2012	Puetz et al., 2018	622	10	90.407		1976	10	96.6599
SCB7	SCB7-053	471	14	500	12	637	16	Dinis, et al., 2012	Puetz et al., 2018	471	7	73.9403		877	11	96.6924
SCB7	SCB7-054	683	22	682	18	679	24	Dinis, et al., 2012	Puetz et al., 2018	683	11	100.589		1855	10	97.035
SCB7	SCB7-055	646	20	642	16	627	24	Dinis, et al., 2012	Puetz et al., 2018	646	10	103.03		1060	14	97.0755
SCB7	SCB7-056	836	28	823	22	789	32	Dinis, et al., 2012	Puetz et al., 2018	836	14	105.957		1115	10	97.13
SCB7	SCB7-057	981	32	1003	24	1052	30	Dinis, et al., 2012	Puetz et al., 2018	981	16	93.251		642	15	97.2727
SCB7	SCB7-058	1910	80	1942	42	1976	20	Dinis, et al., 2012	Puetz et al., 2018	1976	10	96.6599		997	12	97.4585
SCB7	SCB7-059	1379	54	1428	34	1503	20	Dinis, et al., 2012	Puetz et al., 2018	1503	10	91.7498		581	7	97.4832
SCB7	SCB7-060	425	18	455	16	611	36	Dinis, et al., 2012	Puetz et al., 2018	425	9	69.5581		630	15	97.5232
SCB7	SCB7-061	537	18	555	16	628	24	Dinis, et al., 2012	Puetz et al., 2018	537	9	85.5096		616	8	97.6228
SCB7	SCB7-062c	550	18	558	16	591	28	Dinis, et al., 2012	Puetz et al., 2018	550	9	93.0626		626	7	97.6599
SCB7	SCB7-065	963	36	968	28	977	32	Dinis, et al., 2012	Puetz et al., 2018	963	18	98.567		604	8	98.2114
SCB7	SCB7-066	1055	38	1045	28	1024	24	Dinis, et al., 2012	Puetz et al., 2018	1024	12	103.027		351	5	98.3193
SCB7	SCB7-067	1027	38	1026	26	1024	24	Dinis, et al., 2012	Puetz et al., 2018	1024	12	100.293		1045	12	98.3732
SCB7	SCB7-068	643	22	642	18	638	28	Dinis, et al., 2012	Puetz et al., 2018	643	11	100.784		963	18	98.567
SCB7	SCB7-069	1066	40	1062	28	1052	24	Dinis, et al., 2012	Puetz et al., 2018	1052	12	101.331		1050	24	98.6667
SCB7	SCB7-070	629	22	637	20	664	34	Dinis, et al., 2012	Puetz et al., 2018	629	11	94.7289		693	8	98.8588
SCB7	SCB7-071	636	24	634	18	627	24	Dinis, et al., 2012	Puetz et al., 2018	636	12	101.435		614	7	98.8728
SCB7	SCB7-072	1028	38	1034	28	1045	24	Dinis, et al., 2012	Puetz et al., 2018	1045	12	98.3732		972	12	98.9817
SCB7	SCB7-073	487	18	482	16	454	34	Dinis, et al., 2012	Puetz et al., 2018	487	9	107.269		1016	16	99.1142
SCB7	SCB7-074	941	36	934	26	919	24	Dinis, et al., 2012	Puetz et al., 2018	941	18	102.394		592	7	99.4958
SCB7	SCB7-075	666	26	665	20	661	28	Dinis, et al., 2012	Puetz et al., 2018	666	13	100.756		1023	23	99.5112
SCB7	SCB7-076	773	26	842	22	1028	34	Dinis, et al., 2012	Puetz et al., 2018	773	13	75.1946		702	10	99.5745
SCB7	SCB7-078	2091	84	2250	44	2398	18	Dinis, et al., 2012	Puetz et al., 2018	2398	9	87.1977		607	8	99.6716
SCB7	SCB7-079	656	22	664	18	690	18	Dinis, et al., 2012	Puetz et al., 2018	656	11	95.0725		613	7	100.163
SCB7	SCB7-080	1029	50	1039	36	1060	28	Dinis, et al., 2012	Puetz et al., 2018	1060	14	97.0755		588	7	100.17
SCB7	SCB7-081	642	30	646	24	660	26	Dinis, et al., 2012	Puetz et al., 2018	642	15	97.2727		1024	12	100.293
SCB7	SCB7-084	1635	88	1801	54	1998	30	Dinis, et al., 2012	Puetz et al., 2018	1998	15	81.8318		541	7	100.558
SCB7	SCB7-085	630	30	634	24	646	32	Dinis, et al., 2012	Puetz et al., 2018	630	15	97.5232		683	11	100.589
SCB7	SCB7-086	1967	116	2066	62	2166	30	Dinis, et al., 2012	Puetz et al., 2018	2166	15	90.8126		981	16	100.615
SCB7	SCB7-087	1003	50	1035	36	1104	32	Dinis, et al., 2012	Puetz et al., 2018	1104	16	90.8514		666	13	100.756
SCB7	SCB7-095S	496	14	507	18	554	76	Dinis, et al., 2012	Puetz et al., 2018	496	7	89.5307		643	11	100.784
SCB7	SCB7-096	604	16	606	16	615	48	Dinis, et al., 2012	Puetz et al., 2018	604	8	98.2114		723	12	101.119
SCB7	SCB7-096R	387	10	417	12	585	46	Dinis, et al., 2012	Puetz et al., 2018	387	5	66.1538		1052	12	101.331
SCB7	SCB7-097	595	16	604	16	638	48	Dinis, et al., 2012	Puetz et al., 2018	595	8	93.2602		636	12	101.435
SCB7	SCB7-098	1018	24	1020	22	1023	46	Dinis, et al., 2012	Puetz et al., 2018	1023	23	99.5112		824	13	101.478
SCB7	SCB7-099	554	12	576	14	667	46	Dinis, et al., 2012	Puetz et al., 2018	554	6	83.0585		1029	10	101.846
SCB7	SCB7-100	592	14	592	16	595	50	Dinis, et al., 2012	Puetz et al., 2018	592	7	99.4958		941	18	102.394
SCB7	SCB7-101	1036	26	1041	24	1050	48	Dinis, et al., 2012	Puetz et al., 2018	1050	24	98.6667		586	9	102.448
SCB7	SCB7-102	1147	32	1292	30	1543	50	Dinis, et al., 2012	Puetz et al., 2018	1543	25	74.3357		1024	12	103.027
SCB7	SCB7-103	354	8	359	10	393	48	Dinis, et al., 2012	Puetz et al., 2018	354	4	90.0763		646	10	103.03
SCB7	SCB7-104	877	22	886	22	907	48	Dinis, et al., 2012	Puetz et al., 2018	877	11	96.6924		363	6	103.125
SCB7	SCB7-105	785	18	794	20	818	48	Dinis, et al., 2012	Puetz et al., 2018	785	9	95.9658		594	9	103.125
SCB7	SCB7-106	626	14	629	16	641	50	Dinis, et al., 2012	Puetz et al., 2018	626	7	97.6599		585	7	103.357
SCB7	SCB7-107	1388	42	1566	36	1815	54	Dinis, et al., 2012	Puetz et al., 2018	1815	27	76.4738		483	6	103.648
SCB7	SCB7-108	649	16	656	16	679	50	Dinis, et al., 2012	Puetz et al., 2018	649	8	95.5817		707	10	103.666
SCB7	SCB7-109	2185	82	2378	54	2547	62	Dinis, et al., 2012	Puetz et al., 2018	2547	31	85.7872		687	9	103.776
SCB7	SCB7-110	1012	26	1024	24	1048	48	Dinis, et al., 2012	Puetz et al., 2018	1048	24	96.5649		586	9	104.085
SCB7	SCB7-111	541	14	541	14	538	52	Dinis, et al., 2012	Puetz et al., 2018	541	7	100.558		563	7	105.037
SCB7	SCB7-112	588	14	588	16	587	52	Dinis, et al., 2012	Puetz et al., 2018	588	7	100.17		755	9	105.447
SCB7	SCB7-113	483	12	480	12	466	48	Dinis, et al., 2012	Puetz et al., 2018	483	6	103.648		687	8	105.692
SCB7	SCB7-114	581	14	584	16	596	48	Dinis, et al., 2012	Puetz et al., 2018	581	7	97.4832		635	7	105.833
SCB7	SCB7-115	607	16	607	16	609	48	Dinis, et al., 2012	Puetz et al., 2018	607	8	99.6716		836	14	105.957
SCB7	SCB7-116	616	16	620	16	631	50	Dinis, et al., 2012	Puetz et al., 2018	616	8	97.6228		613	8	106.239
SCB7	SCB7-118	552	18	582	18	701	48	Dinis, et al., 2012	Puetz et al., 2018	552	9	78.7447		574	9	106.296
SCB7	SCB7-120	633	16	641	16	671	50	Dinis, et al., 2012	Puetz et al., 2018	633	8	94.3368		487	9	107.269
														VM21	Gzhelian
VM21	VM21-001	2427	44	2458	26	2483	28	Dinis, et al., 2012	Puetz et al., 2018	2483	14	97.7447		534	7	91.5952
VM21	VM21-002	534	14	543	14	583	28	Dinis, et al., 2012	Puetz et al., 2018	534	7	91.5952		2652	19	93.4389
VM21	VM21-003	2539	86	2609	46	2664	42	Dinis, et al., 2012	Puetz et al., 2018	2664	21	95.3078		1861	12	93.6056
VM21	VM21-004	1913	28	1889	18	1862	26	Dinis, et al., 2012	Puetz et al., 2018	1862	13	102.739		733	7	93.734
VM21	VM21-006	1909	28	1933	20	1960	26	Dinis, et al., 2012	Puetz et al., 2018	1960	13	97.398		603	6	94.5141
VM21	VM21-007	1782	24	1806	18	1832	24	Dinis, et al., 2012	Puetz et al., 2018	1832	12	97.2707		2198	18	95.2229
VM21	VM21-008	683	8	676	10	653	26	Dinis, et al., 2012	Puetz et al., 2018	683	4	104.594		600	10	95.2381
VM21	VM21-009	1067	14	1064	12	1059	22	Dinis, et al., 2012	Puetz et al., 2018	1059	11	100.755		2664	21	95.3078
VM21	VM21-010	1965	36	1999	22	2035	22	Dinis, et al., 2012	Puetz et al., 2018	2035	11	96.5602		2035	11	96.5602
VM21	VM21-011	847	14	841	12	826	24	Dinis, et al., 2012	Puetz et al., 2018	847	7	102.542		1832	12	97.2707
VM21	VM21-012	589	8	582	8	555	24	Dinis, et al., 2012	Puetz et al., 2018	589	4	106.126		1960	13	97.398
VM21	VM21-013	691	10	687	8	674	22	Dinis, et al., 2012	Puetz et al., 2018	691	5	102.522		615	6	97.4643
VM21	VM21-014	645	8	644	8	640	24	Dinis, et al., 2012	Puetz et al., 2018	645	4	100.781		2483	14	97.7447
VM21	VM21-015	639	8	639	8	638	24	Dinis, et al., 2012	Puetz et al., 2018	639	4	100.157		1047	16	98.2808
VM21	VM21-016	683	10	682	10	679	24	Dinis, et al., 2012	Puetz et al., 2018	683	5	100.589		1062	9	98.5876
VM21	VM21-018	618	8	619	10	624	28	Dinis, et al., 2012	Puetz et al., 2018	618	4	99.0385		492	6	98.7952
VM21	VM21-019	2478	74	2575	40	2652	38	Dinis, et al., 2012	Puetz et al., 2018	2652	19	93.4389		1999	20	98.8994
VM21	VM21-021	1036	16	1032	14	1024	24	Dinis, et al., 2012	Puetz et al., 2018	1024	12	101.172		508	6	99.0253
VM21	VM21-022	2665	50	2658	28	2653	30	Dinis, et al., 2012	Puetz et al., 2018	2653	15	100.452		618	4	99.0385
VM21	VM21-023	1762	26	1761	18	1759	26	Dinis, et al., 2012	Puetz et al., 2018	1759	13	100.171		622	3	99.0446
VM21	VM21-024	1896	30	1895	20	1894	26	Dinis, et al., 2012	Puetz et al., 2018	1894	13	100.106		591	4	99.1611
VM21	VM21-025	1032	16	1035	14	1040	24	Dinis, et al., 2012	Puetz et al., 2018	1040	12	99.2308		1040	12	99.2308
VM21	VM21-027	733	14	745	12	782	26	Dinis, et al., 2012	Puetz et al., 2018	733	7	93.734		588	5	99.4924
VM21	VM21-028	591	10	591	10	591	28	Dinis, et al., 2012	Puetz et al., 2018	591	5	100		618	4	99.8384
VM21	VM21-029	1742	26	1797	18	1861	24	Dinis, et al., 2012	Puetz et al., 2018	1861	12	93.6056		591	5	100
VM21	VM21-031	2007	32	1995	20	1982	26	Dinis, et al., 2012	Puetz et al., 2018	1982	13	101.261		659	5	100
VM21	VM21-032	639	10	635	10	619	26	Dinis, et al., 2012	Puetz et al., 2018	639	5	103.231		964	6	100.104
VM21	VM21-033	508	12	509	12	513	34	Dinis, et al., 2012	Puetz et al., 2018	508	6	99.0253		1894	13	100.106
VM21	VM21-034	1054	18	1049	16	1038	26	Dinis, et al., 2012	Puetz et al., 2018	1038	13	101.541		639	4	100.157
VM21	VM21-035	615	12	619	12	631	40	Dinis, et al., 2012	Puetz et al., 2018	615	6	97.4643		1759	13	100.171
VM21	VM21-037	863	14	857	12	842	24	Dinis, et al., 2012	Puetz et al., 2018	863	7	102.494		2653	15	100.452
VM21	VM21-038	622	10	617	10	601	26	Dinis, et al., 2012	Puetz et al., 2018	622	5	103.494		683	5	100.589
VM21	VM21-039	603	12	610	10	638	26	Dinis, et al., 2012	Puetz et al., 2018	603	6	94.5141		985	7	100.716
VM21	VM21-041	492	12	493	12	498	34	Dinis, et al., 2012	Puetz et al., 2018	492	6	98.7952		1059	11	100.755
VM21	VM21-042	618	8	618	8	619	26	Dinis, et al., 2012	Puetz et al., 2018	618	4	99.8384		645	4	100.781
VM21	VM21-043	659	10	659	10	659	24	Dinis, et al., 2012	Puetz et al., 2018	659	5	100		1024	12	101.172
VM21	VM21-044	1047	12	1052	10	1062	18	Dinis, et al., 2012	Puetz et al., 2018	1062	9	98.5876		1982	13	101.261
VM21	VM21-045	985	14	983	10	978	14	Dinis, et al., 2012	Puetz et al., 2018	985	7	100.716		1015	18	101.281
VM21	VM21-046	596	10	589	8	566	16	Dinis, et al., 2012	Puetz et al., 2018	596	5	105.3		758	6	101.473
VM21	VM21-048	622	6	623	8	628	26	Dinis, et al., 2012	Puetz et al., 2018	622	3	99.0446		1038	13	101.541
VM21	VM21-050	964	12	964	12	963	32	Dinis, et al., 2012	Puetz et al., 2018	964	6	100.104		746	6	101.774
VM21	VM21-051	541	10	535	10	513	32	Dinis, et al., 2012	Puetz et al., 2018	541	5	105.458		930	7	102.423
VM21	VM21-052	746	12	743	12	733	34	Dinis, et al., 2012	Puetz et al., 2018	746	6	101.774		863	7	102.494
VM21	VM21-053	2093	36	2146	26	2198	36	Dinis, et al., 2012	Puetz et al., 2018	2198	18	95.2229		691	5	102.522
VM21	VM21-056	588	10	589	10	591	36	Dinis, et al., 2012	Puetz et al., 2018	588	5	99.4924		847	7	102.542
VM21	VM21-057	733	10	727	12	706	32	Dinis, et al., 2012	Puetz et al., 2018	733	5	103.824		1862	13	102.739
VM21	VM21-058	602	8	596	10	575	34	Dinis, et al., 2012	Puetz et al., 2018	602	4	104.696		639	5	103.231
VM21	VM21-060	1028	12	1024	14	1015	36	Dinis, et al., 2012	Puetz et al., 2018	1015	18	101.281		622	5	103.494
VM21	VM21-061	600	20	606	18	630	30	Dinis, et al., 2012	Puetz et al., 2018	600	10	95.2381		733	5	103.824
VM21	VM21-062	1977	36	1988	28	1999	40	Dinis, et al., 2012	Puetz et al., 2018	1999	20	98.8994		683	4	104.594
VM21	VM21-064	1029	18	1035	16	1047	32	Dinis, et al., 2012	Puetz et al., 2018	1047	16	98.2808		602	4	104.696
VM21	VM21-065	591	8	592	10	596	38	Dinis, et al., 2012	Puetz et al., 2018	591	4	99.1611		596	5	105.3
VM21	VM21-066	758	12	755	12	747	34	Dinis, et al., 2012	Puetz et al., 2018	758	6	101.473		488	5	105.4
VM21	VM21-068	930	14	923	14	908	36	Dinis, et al., 2012	Puetz et al., 2018	930	7	102.423		541	5	105.458
VM21	VM21-069	488	10	484	10	463	36	Dinis, et al., 2012	Puetz et al., 2018	488	5	105.4		589	4	106.126
														VM49	Gzhelian
VM49	VM49-017	972	24	969	18	963	22	Dinis, et al., 2012	Puetz et al., 2018	972	12	100.935		1861	25	61.741
VM49	VM49-018	633	22	657	20	738	28	Dinis, et al., 2012	Puetz et al., 2018	633	11	85.7724		714	12	64.9682
VM49	VM49-019	622	18	627	16	644	24	Dinis, et al., 2012	Puetz et al., 2018	622	9	96.5839		550	9	66.1058
VM49	VM49-021	2427	102	2529	50	2611	28	Dinis, et al., 2012	Puetz et al., 2018	2611	14	92.9529		475	5	66.4336
VM49	VM49-022	977	30	995	22	1034	26	Dinis, et al., 2012	Puetz et al., 2018	977	15	94.4874		1826	26	67.2508
VM49	VM49-023	843	32	835	24	814	34	Dinis, et al., 2012	Puetz et al., 2018	843	16	103.563		714	7	75.2371
VM49	VM49-024	868	26	853	20	814	28	Dinis, et al., 2012	Puetz et al., 2018	868	13	106.634		462	6	77.7778
VM49	VM49-025	1904	64	1972	36	2044	24	Dinis, et al., 2012	Puetz et al., 2018	2044	12	93.1507		2046	15	79.1789
VM49	VM49-026	532	12	549	12	619	24	Dinis, et al., 2012	Puetz et al., 2018	532	6	85.9451		1522	25	80.092
VM49	VM49-027	475	10	518	12	715	34	Dinis, et al., 2012	Puetz et al., 2018	475	5	66.4336		789	8	81.7617
VM49	VM49-028	604	14	602	14	594	32	Dinis, et al., 2012	Puetz et al., 2018	604	7	101.684		814	12	82.0565
VM49	VM49-029	572	14	566	12	543	34	Dinis, et al., 2012	Puetz et al., 2018	572	7	105.341		2631	16	82.8202
VM49	VM49-030	1899	76	1892	44	1885	36	Dinis, et al., 2012	Puetz et al., 2018	1885	18	100.743		1843	19	83.2339
VM49	VM49-031	641	14	624	14	565	30	Dinis, et al., 2012	Puetz et al., 2018	641	7	113.451		1971	16	83.8661
VM49	VM49-032	822	22	821	18	819	26	Dinis, et al., 2012	Puetz et al., 2018	822	11	100.366		633	11	85.7724
VM49	VM49-033	823	34	811	26	780	32	Dinis, et al., 2012	Puetz et al., 2018	823	17	105.513		532	6	85.9451
VM49	VM49-034	612	30	603	26	567	54	Dinis, et al., 2012	Puetz et al., 2018	612	15	107.937		2499	17	86.1144
VM49	VM49-035	550	18	609	16	832	24	Dinis, et al., 2012	Puetz et al., 2018	550	9	66.1058		612	12	86.8085
VM49	VM49-036	610	22	628	20	694	24	Dinis, et al., 2012	Puetz et al., 2018	610	11	87.8963		522	7	87.1452
VM49	VM49-037	757	20	754	16	744	24	Dinis, et al., 2012	Puetz et al., 2018	757	10	101.747		2200	26	87.8182
VM49	VM49-038	1043	36	1046	26	1054	24	Dinis, et al., 2012	Puetz et al., 2018	1054	12	98.9564		610	11	87.8963
VM49	VM49-039	695	26	693	20	687	24	Dinis, et al., 2012	Puetz et al., 2018	695	13	101.164		2558	18	90.3831
VM49	VM49-040	575	20	543	20	409	66	Dinis, et al., 2012	Puetz et al., 2018	575	10	140.587		2981	22	91.949
VM49	VM49-041	814	24	864	20	992	26	Dinis, et al., 2012	Puetz et al., 2018	814	12	82.0565		2647	20	92.1043
VM49	VM49-042	600	18	595	16	572	26	Dinis, et al., 2012	Puetz et al., 2018	600	9	104.895		2112	28	92.5189
VM49	VM49-043	1620	48	1815	32	2046	30	Dinis, et al., 2012	Puetz et al., 2018	2046	15	79.1789		1930	12	92.5907
VM49	VM49-044	596	14	600	14	613	40	Dinis, et al., 2012	Puetz et al., 2018	596	7	97.2268		2611	14	92.9529
VM49	VM49-045	1653	48	1798	32	1971	32	Dinis, et al., 2012	Puetz et al., 2018	1971	16	83.8661		906	16	93.1141
VM49	VM49-046	822	20	834	18	866	30	Dinis, et al., 2012	Puetz et al., 2018	822	10	94.9192		2044	12	93.1507
VM49	VM49-047	645	16	637	14	608	26	Dinis, et al., 2012	Puetz et al., 2018	645	8	106.086		1857	12	93.538
VM49	VM49-048	717	18	701	16	649	36	Dinis, et al., 2012	Puetz et al., 2018	717	9	110.478		542	7	93.7716
VM49	VM49-049	690	18	683	16	663	32	Dinis, et al., 2012	Puetz et al., 2018	690	9	104.072		564	7	94
VM49	VM49-050	1787	54	1854	32	1930	24	Dinis, et al., 2012	Puetz et al., 2018	1930	12	92.5907		643	8	94.0058
VM49	VM49-051	462	12	485	12	594	32	Dinis, et al., 2012	Puetz et al., 2018	462	6	77.7778		598	11	94.0252
VM49	VM49-052	1988	66	2019	36	2051	26	Dinis, et al., 2012	Puetz et al., 2018	2051	13	96.9283		2028	23	94.2801
VM49	VM49-053	1043	28	1043	20	1045	24	Dinis, et al., 2012	Puetz et al., 2018	1045	12	99.8086		977	15	94.4874
VM49	VM49-054	1737	54	1792	32	1857	24	Dinis, et al., 2012	Puetz et al., 2018	1857	12	93.538		584	7	94.6515
VM49	VM49-055	1842	48	1723	28	1581	30	Dinis, et al., 2012	Puetz et al., 2018	1581	15	116.509		822	10	94.9192
VM49	VM49-056	1879	38	1924	24	1973	30	Dinis, et al., 2012	Puetz et al., 2018	1973	15	95.2357		998	13	94.9572
VM49	VM49-057	728	14	727	12	723	28	Dinis, et al., 2012	Puetz et al., 2018	728	7	100.692		482	4	95.069
VM49	VM49-058	482	8	487	8	507	26	Dinis, et al., 2012	Puetz et al., 2018	482	4	95.069		1973	15	95.2357
VM49	VM49-059	602	20	606	22	620	70	Dinis, et al., 2012	Puetz et al., 2018	602	10	97.0968		588	7	95.4545
VM49	VM49-060	677	14	673	12	659	28	Dinis, et al., 2012	Puetz et al., 2018	677	7	102.731		1081	23	95.4672
VM49	VM49-061	1022	18	1030	14	1047	28	Dinis, et al., 2012	Puetz et al., 2018	1047	14	97.6122		761	15	95.603
VM49	VM49-063	628	8	629	10	632	30	Dinis, et al., 2012	Puetz et al., 2018	628	4	99.3671		617	12	96.4062
VM49	VM49-064	737	10	724	10	685	28	Dinis, et al., 2012	Puetz et al., 2018	737	5	107.591		622	9	96.5839
VM49	VM49-065	668	10	671	10	683	32	Dinis, et al., 2012	Puetz et al., 2018	668	5	97.8038		2003	26	96.6051
VM49	VM49-067	2438	68	2554	38	2647	40	Dinis, et al., 2012	Puetz et al., 2018	2647	20	92.1043		2051	13	96.9283
VM49	VM49-068	647	10	642	10	623	28	Dinis, et al., 2012	Puetz et al., 2018	647	5	103.852		1995	16	96.9424
VM49	VM49-069	640	10	639	10	636	32	Dinis, et al., 2012	Puetz et al., 2018	640	5	100.629		709	14	96.9904
VM49	VM49-070	628	10	622	12	599	42	Dinis, et al., 2012	Puetz et al., 2018	628	5	104.841		602	10	97.0968
VM49	VM49-071	573	8	568	8	548	30	Dinis, et al., 2012	Puetz et al., 2018	573	4	104.562		596	7	97.2268
VM49	VM49-072	625	8	624	10	619	30	Dinis, et al., 2012	Puetz et al., 2018	625	4	100.969		1765	15	97.2805
VM49	VM49-073	2152	44	2335	30	2499	34	Dinis, et al., 2012	Puetz et al., 2018	2499	17	86.1144		1047	14	97.6122
VM49	VM49-074	620	10	616	10	601	34	Dinis, et al., 2012	Puetz et al., 2018	620	5	103.161		668	5	97.8038
VM49	VM49-075	2741	88	2881	46	2981	44	Dinis, et al., 2012	Puetz et al., 2018	2981	22	91.949		951	19	98.3454
VM49	VM49-076	1717	46	1739	28	1765	30	Dinis, et al., 2012	Puetz et al., 2018	1765	15	97.2805		737	6	98.3979
VM49	VM49-077	1934	50	1963	30	1995	32	Dinis, et al., 2012	Puetz et al., 2018	1995	16	96.9424		469	4	98.7368
VM49	VM49-078	584	18	578	16	552	32	Dinis, et al., 2012	Puetz et al., 2018	584	9	105.797		1054	12	98.9564
VM49	VM49-079	469	8	470	8	475	30	Dinis, et al., 2012	Puetz et al., 2018	469	4	98.7368		628	4	99.3671
VM49	VM49-080	714	14	774	14	949	30	Dinis, et al., 2012	Puetz et al., 2018	714	7	75.2371		1045	12	99.8086
VM49	VM49-081	789	16	836	14	965	30	Dinis, et al., 2012	Puetz et al., 2018	789	8	81.7617		570	10	99.8249
VM49	VM49-082	737	12	740	12	749	30	Dinis, et al., 2012	Puetz et al., 2018	737	6	98.3979		685	13	100
VM49	VM49-083	625	12	623	12	614	32	Dinis, et al., 2012	Puetz et al., 2018	625	6	101.792		579	11	100
VM49	VM49-084	1534	34	1669	26	1843	38	Dinis, et al., 2012	Puetz et al., 2018	1843	19	83.2339		822	11	100.366
VM49	VM49-085	2179	94	2421	50	2631	32	Dinis, et al., 2012	Puetz et al., 2018	2631	16	82.8202		640	5	100.629
VM49	VM49-086	570	20	571	18	571	40	Dinis, et al., 2012	Puetz et al., 2018	570	10	99.8249		602	11	100.669
VM49	VM49-087	648	24	643	22	627	46	Dinis, et al., 2012	Puetz et al., 2018	648	12	103.349		728	7	100.692
VM49	VM49-088	588	22	584	20	569	46	Dinis, et al., 2012	Puetz et al., 2018	588	11	103.339		1885	18	100.743
VM49	VM49-089	1912	100	1968	56	2028	46	Dinis, et al., 2012	Puetz et al., 2018	2028	23	94.2801		972	12	100.935
VM49	VM49-090	582	22	577	18	557	36	Dinis, et al., 2012	Puetz et al., 2018	582	11	104.488		625	4	100.969
VM49	VM49-091	2312	116	2445	60	2558	36	Dinis, et al., 2012	Puetz et al., 2018	2558	18	90.3831		695	13	101.164
VM49	VM49-092	951	38	956	28	967	34	Dinis, et al., 2012	Puetz et al., 2018	951	19	98.3454		604	7	101.684
VM49	VM49-093	617	24	622	20	640	36	Dinis, et al., 2012	Puetz et al., 2018	617	12	96.4062		757	10	101.747
VM49	VM49-094	685	26	685	22	685	42	Dinis, et al., 2012	Puetz et al., 2018	685	13	100		625	6	101.792
VM49	VM49-095	761	30	770	24	796	36	Dinis, et al., 2012	Puetz et al., 2018	761	15	95.603		677	7	102.731
VM49	VM49-096	612	24	632	20	705	34	Dinis, et al., 2012	Puetz et al., 2018	612	12	86.8085		620	5	103.161
VM49	VM49-097	709	28	715	24	731	36	Dinis, et al., 2012	Puetz et al., 2018	709	14	96.9904		588	11	103.339
VM49	VM49-098	579	22	579	20	579	42	Dinis, et al., 2012	Puetz et al., 2018	579	11	100		648	12	103.349
VM49	VM49-099	598	22	606	18	636	34	Dinis, et al., 2012	Puetz et al., 2018	598	11	94.0252		843	16	103.563
VM49	VM49-100	602	22	601	20	598	40	Dinis, et al., 2012	Puetz et al., 2018	602	11	100.669		647	5	103.852
VM49	VM49-101	1954	62	2032	42	2112	56	Dinis, et al., 2012	Puetz et al., 2018	2112	28	92.5189		690	9	104.072
VM49	VM49-102	1228	36	1464	34	1826	52	Dinis, et al., 2012	Puetz et al., 2018	1826	26	67.2508		582	11	104.488
VM49	VM49-103	1932	62	2065	42	2200	52	Dinis, et al., 2012	Puetz et al., 2018	2200	26	87.8182		573	4	104.562
VM49	VM49-104	542	14	549	14	578	48	Dinis, et al., 2012	Puetz et al., 2018	542	7	93.7716		628	5	104.841
VM49	VM49-105	906	32	926	26	973	46	Dinis, et al., 2012	Puetz et al., 2018	906	16	93.1141		600	9	104.895
VM49	VM49-106	1149	32	1423	32	1861	50	Dinis, et al., 2012	Puetz et al., 2018	1861	25	61.741		572	7	105.341
VM49	VM49-107	588	14	594	16	616	50	Dinis, et al., 2012	Puetz et al., 2018	588	7	95.4545		823	17	105.513
VM49	VM49-108	1935	62	1968	42	2003	52	Dinis, et al., 2012	Puetz et al., 2018	2003	26	96.6051		584	9	105.797
VM49	VM49-109	998	26	1014	24	1051	48	Dinis, et al., 2012	Puetz et al., 2018	998	13	94.9572		645	8	106.086
VM49	VM49-110	1219	34	1333	30	1522	50	Dinis, et al., 2012	Puetz et al., 2018	1522	25	80.092		868	13	106.634
VM49	VM49-112	584	14	591	16	617	50	Dinis, et al., 2012	Puetz et al., 2018	584	7	94.6515		737	5	107.591
VM49	VM49-113	1032	28	1048	26	1081	46	Dinis, et al., 2012	Puetz et al., 2018	1081	23	95.4672		612	15	107.937
VM49	VM49-114	522	14	537	16	599	50	Dinis, et al., 2012	Puetz et al., 2018	522	7	87.1452		717	9	110.478
VM49	VM49-115	564	14	571	16	600	50	Dinis, et al., 2012	Puetz et al., 2018	564	7	94		641	7	113.451
VM49	VM49-116	714	24	814	28	1099	66	Dinis, et al., 2012	Puetz et al., 2018	714	12	64.9682		1581	15	116.509
VM49	VM49-117	643	16	652	18	684	50	Dinis, et al., 2012	Puetz et al., 2018	643	8	94.0058		575	10	140.587
														VMC25	Gzhelian
VMC25	VMC25-001	558	12	556	12	548	32	Dinis, et al., 2012	Puetz et al., 2018	558	6	101.825		558	7	90.4376
VMC25	VMC25-002	624	14	624	14	623	34	Dinis, et al., 2012	Puetz et al., 2018	624	7	100.161		635	7	90.7143
VMC25	VMC25-003	645	12	643	12	638	36	Dinis, et al., 2012	Puetz et al., 2018	645	6	101.097		605	8	92.0852
VMC25	VMC25-005	626	16	622	14	608	36	Dinis, et al., 2012	Puetz et al., 2018	626	8	102.961		561	7	93.0348
VMC25	VMC25-007	634	12	635	12	641	38	Dinis, et al., 2012	Puetz et al., 2018	634	6	98.908		586	7	94.2122
VMC25	VMC25-009	2289	68	2340	38	2385	40	Dinis, et al., 2012	Puetz et al., 2018	2385	20	95.9748		646	8	94.3066
VMC25	VMC25-011	975	24	972	20	964	36	Dinis, et al., 2012	Puetz et al., 2018	975	12	101.141		2715	15	94.3646
VMC25	VMC25-013	592	12	588	12	575	38	Dinis, et al., 2012	Puetz et al., 2018	592	6	102.957		763	10	94.665
VMC25	VMC25-014	783	14	780	14	772	40	Dinis, et al., 2012	Puetz et al., 2018	783	7	101.425		618	7	94.7853
VMC25	VMC25-015	605	16	616	16	657	42	Dinis, et al., 2012	Puetz et al., 2018	605	8	92.0852		590	9	95.0081
VMC25	VMC25-016	698	16	695	14	687	28	Dinis, et al., 2012	Puetz et al., 2018	698	8	101.601		830	13	95.1835
VMC25	VMC25-018	626	16	631	14	649	28	Dinis, et al., 2012	Puetz et al., 2018	626	8	96.4561		895	15	95.2128
VMC25	VMC25-019	582	14	586	12	601	26	Dinis, et al., 2012	Puetz et al., 2018	582	7	96.8386		620	7	95.2381
VMC25	VMC25-021	625	16	631	14	655	26	Dinis, et al., 2012	Puetz et al., 2018	625	8	95.4198		773	9	95.3144
VMC25	VMC25-023	485	12	487	12	496	34	Dinis, et al., 2012	Puetz et al., 2018	485	6	97.7823		625	8	95.4198
VMC25	VMC25-024	745	26	740	20	727	26	Dinis, et al., 2012	Puetz et al., 2018	745	13	102.476		2385	20	95.9748
VMC25	VMC25-026	714	20	712	16	706	24	Dinis, et al., 2012	Puetz et al., 2018	714	10	101.133		588	8	96.3934
VMC25	VMC25-027	593	14	591	12	583	28	Dinis, et al., 2012	Puetz et al., 2018	593	7	101.715		2080	13	96.4423
VMC25	VMC25-028	577	14	577	12	577	26	Dinis, et al., 2012	Puetz et al., 2018	577	7	100		626	8	96.4561
VMC25	VMC25-030	660	20	663	18	672	30	Dinis, et al., 2012	Puetz et al., 2018	660	10	98.2143		582	7	96.8386
VMC25	VMC25-031	617	18	614	16	601	28	Dinis, et al., 2012	Puetz et al., 2018	617	9	102.662		628	10	96.9136
VMC25	VMC25-032	671	20	666	16	652	26	Dinis, et al., 2012	Puetz et al., 2018	671	10	102.914		1907	12	96.9586
VMC25	VMC25-033	586	14	593	14	622	26	Dinis, et al., 2012	Puetz et al., 2018	586	7	94.2122		516	16	96.9925
VMC25	VMC25-036	642	16	640	14	636	32	Dinis, et al., 2012	Puetz et al., 2018	642	8	100.943		763	8	97.0738
VMC25	VMC25-037	2006	60	2043	34	2080	26	Dinis, et al., 2012	Puetz et al., 2018	2080	13	96.4423		576	6	97.1332
VMC25	VMC25-038	677	16	676	14	672	24	Dinis, et al., 2012	Puetz et al., 2018	677	8	100.744		631	6	97.2265
VMC25	VMC25-039	646	18	646	16	648	26	Dinis, et al., 2012	Puetz et al., 2018	646	9	99.6914		635	7	97.3926
VMC25	VMC25-042	969	28	975	22	988	32	Dinis, et al., 2012	Puetz et al., 2018	969	14	98.0769		609	7	97.5962
VMC25	VMC25-043	609	16	611	14	617	32	Dinis, et al., 2012	Puetz et al., 2018	609	8	98.7034		1883	11	97.6633
VMC25	VMC25-046	849	22	848	18	845	24	Dinis, et al., 2012	Puetz et al., 2018	849	11	100.473		599	7	97.7162
VMC25	VMC25-047	818	22	812	18	796	24	Dinis, et al., 2012	Puetz et al., 2018	818	11	102.764		643	12	97.7204
VMC25	VMC25-048	603	14	603	12	605	26	Dinis, et al., 2012	Puetz et al., 2018	603	7	99.6694		485	6	97.7823
VMC25	VMC25-049	643	16	641	14	635	24	Dinis, et al., 2012	Puetz et al., 2018	643	8	101.26		969	14	98.0769
VMC25	VMC25-050	775	20	766	20	740	56	Dinis, et al., 2012	Puetz et al., 2018	775	10	104.73		651	7	98.19
VMC25	VMC25-052	619	18	617	16	609	26	Dinis, et al., 2012	Puetz et al., 2018	619	9	101.642		660	10	98.2143
VMC25	VMC25-053	608	16	605	14	595	24	Dinis, et al., 2012	Puetz et al., 2018	608	8	102.185		717	9	98.2192
VMC25	VMC25-054	702	18	703	16	707	24	Dinis, et al., 2012	Puetz et al., 2018	702	9	99.2928		566	10	98.4348
VMC25	VMC25-055	561	14	569	12	603	24	Dinis, et al., 2012	Puetz et al., 2018	561	7	93.0348		1024	10	98.4375
VMC25	VMC25-057	786	22	786	18	785	24	Dinis, et al., 2012	Puetz et al., 2018	786	11	100.127		973	12	98.4818
VMC25	VMC25-059	1064	28	1065	20	1066	28	Dinis, et al., 2012	Puetz et al., 2018	1066	14	99.8124		609	8	98.7034
VMC25	VMC25-061	664	14	660	12	647	26	Dinis, et al., 2012	Puetz et al., 2018	664	7	102.628		634	6	98.908
VMC25	VMC25-064	872	18	872	14	872	22	Dinis, et al., 2012	Puetz et al., 2018	872	9	100		647	10	98.9297
VMC25	VMC25-065	590	14	590	14	590	30	Dinis, et al., 2012	Puetz et al., 2018	590	7	100		577	6	99.1409
VMC25	VMC25-066	599	12	594	10	573	26	Dinis, et al., 2012	Puetz et al., 2018	599	6	104.538		702	9	99.2928
VMC25	VMC25-067	1008	20	1013	16	1024	20	Dinis, et al., 2012	Puetz et al., 2018	1024	10	98.4375		603	7	99.6694
VMC25	VMC25-069	643	24	647	20	658	26	Dinis, et al., 2012	Puetz et al., 2018	643	12	97.7204		646	9	99.6914
VMC25	VMC25-071	763	16	769	14	786	26	Dinis, et al., 2012	Puetz et al., 2018	763	8	97.0738		2620	14	99.8092
VMC25	VMC25-072	769	20	768	18	763	42	Dinis, et al., 2012	Puetz et al., 2018	769	10	100.786		1066	14	99.8124
VMC25	VMC25-073	584	18	569	20	513	74	Dinis, et al., 2012	Puetz et al., 2018	584	9	113.84		622	7	99.8395
VMC25	VMC25-074	590	18	596	16	621	26	Dinis, et al., 2012	Puetz et al., 2018	590	9	95.0081		804	9	99.8758
VMC25	VMC25-075	635	14	650	14	700	28	Dinis, et al., 2012	Puetz et al., 2018	635	7	90.7143		577	7	100
VMC25	VMC25-076	773	18	783	16	811	24	Dinis, et al., 2012	Puetz et al., 2018	773	9	95.3144		872	9	100
VMC25	VMC25-077	631	12	635	10	649	22	Dinis, et al., 2012	Puetz et al., 2018	631	6	97.2265		590	7	100
VMC25	VMC25-078	1849	48	1876	28	1907	24	Dinis, et al., 2012	Puetz et al., 2018	1907	12	96.9586		829	16	100
VMC25	VMC25-082	536	10	535	10	528	28	Dinis, et al., 2012	Puetz et al., 2018	536	5	101.515		786	11	100.127
VMC25	VMC25-083	618	14	625	12	652	24	Dinis, et al., 2012	Puetz et al., 2018	618	7	94.7853		624	7	100.161
VMC25	VMC25-084	651	14	654	12	663	28	Dinis, et al., 2012	Puetz et al., 2018	651	7	98.19		605	7	100.332
VMC25	VMC25-085	1839	44	1860	26	1883	22	Dinis, et al., 2012	Puetz et al., 2018	1883	11	97.6633		664	7	100.454
VMC25	VMC25-086	684	14	680	12	667	24	Dinis, et al., 2012	Puetz et al., 2018	684	7	102.549		849	11	100.473
VMC25	VMC25-087	600	14	595	12	574	28	Dinis, et al., 2012	Puetz et al., 2018	600	7	104.53		677	8	100.744
VMC25	VMC25-088	497	12	494	12	480	28	Dinis, et al., 2012	Puetz et al., 2018	497	6	103.542		769	10	100.786
VMC25	VMC25-089	2615	80	2618	38	2620	28	Dinis, et al., 2012	Puetz et al., 2018	2620	14	99.8092		536	9	100.942
VMC25	VMC25-090	973	24	977	18	988	24	Dinis, et al., 2012	Puetz et al., 2018	973	12	98.4818		642	8	100.943
VMC25	VMC25-093	830	26	842	26	872	62	Dinis, et al., 2012	Puetz et al., 2018	830	13	95.1835		613	7	100.988
VMC25	VMC25-095	577	12	578	10	582	24	Dinis, et al., 2012	Puetz et al., 2018	577	6	99.1409		645	6	101.097
VMC25	VMC25-099	763	20	774	18	806	28	Dinis, et al., 2012	Puetz et al., 2018	763	10	94.665		714	10	101.133
VMC25	VMC25-101	654	14	651	12	640	28	Dinis, et al., 2012	Puetz et al., 2018	654	7	102.188		975	12	101.141
VMC25	VMC25-104	942	20	934	16	915	22	Dinis, et al., 2012	Puetz et al., 2018	942	10	102.951		643	8	101.26
VMC25	VMC25-105	576	12	580	12	593	22	Dinis, et al., 2012	Puetz et al., 2018	576	6	97.1332		783	7	101.425
VMC25	VMC25-107	664	14	663	12	661	24	Dinis, et al., 2012	Puetz et al., 2018	664	7	100.454		536	5	101.515
VMC25	VMC25-108	622	14	622	14	623	32	Dinis, et al., 2012	Puetz et al., 2018	622	7	99.8395		698	8	101.601
VMC25	VMC25-109	558	14	570	14	617	36	Dinis, et al., 2012	Puetz et al., 2018	558	7	90.4376		619	9	101.642
VMC25	VMC25-110	635	14	639	12	652	30	Dinis, et al., 2012	Puetz et al., 2018	635	7	97.3926		593	7	101.715
VMC25	VMC25-111	2562	78	2649	40	2715	30	Dinis, et al., 2012	Puetz et al., 2018	2715	15	94.3646		558	6	101.825
VMC25	VMC25-114	829	32	829	26	829	28	Dinis, et al., 2012	Puetz et al., 2018	829	16	100		608	8	102.185
VMC25	VMC25-115	2098	58	2071	32	2044	28	Dinis, et al., 2012	Puetz et al., 2018	2044	14	102.642		654	7	102.188
VMC25	VMC25-116	636	14	630	14	606	30	Dinis, et al., 2012	Puetz et al., 2018	636	7	104.95		745	13	102.476
VMC25	VMC25-117	1012	22	996	18	961	30	Dinis, et al., 2012	Puetz et al., 2018	961	15	105.307		684	7	102.549
VMC25	VMC25-118	728	18	715	18	675	44	Dinis, et al., 2012	Puetz et al., 2018	728	9	107.852		664	7	102.628
VMC25	VMC25-121	621	20	604	18	538	38	Dinis, et al., 2012	Puetz et al., 2018	621	10	115.428		2044	14	102.642
VMC25	VMC25-122	542	14	537	12	513	28	Dinis, et al., 2012	Puetz et al., 2018	542	7	105.653		617	9	102.662
VMC25	VMC25-125	717	18	720	16	730	26	Dinis, et al., 2012	Puetz et al., 2018	717	9	98.2192		818	11	102.764
VMC25	VMC25-126	647	20	649	16	654	26	Dinis, et al., 2012	Puetz et al., 2018	647	10	98.9297		671	10	102.914
VMC25	VMC25-127	588	16	593	14	610	26	Dinis, et al., 2012	Puetz et al., 2018	588	8	96.3934		942	10	102.951
VMC25	VMC25-128	599	14	602	12	613	30	Dinis, et al., 2012	Puetz et al., 2018	599	7	97.7162		592	6	102.957
VMC25	VMC25-129	628	20	632	16	648	32	Dinis, et al., 2012	Puetz et al., 2018	628	10	96.9136		626	8	102.961
VMC25	VMC25-130	536	18	535	14	531	24	Dinis, et al., 2012	Puetz et al., 2018	536	9	100.942		497	6	103.542
VMC25	VMC25-131	566	20	567	18	575	38	Dinis, et al., 2012	Puetz et al., 2018	566	10	98.4348		588	7	103.704
VMC25	VMC25-132	895	30	908	24	940	24	Dinis, et al., 2012	Puetz et al., 2018	895	15	95.2128		600	7	104.53
VMC25	VMC25-134	516	32	519	28	532	36	Dinis, et al., 2012	Puetz et al., 2018	516	16	96.9925		599	6	104.538
VMC25	VMC25-138	620	14	627	12	651	26	Dinis, et al., 2012	Puetz et al., 2018	620	7	95.2381		775	10	104.73
VMC25	VMC25-139	588	14	584	16	567	58	Dinis, et al., 2012	Puetz et al., 2018	588	7	103.704		636	7	104.95
VMC25	VMC25-140	609	14	612	12	624	26	Dinis, et al., 2012	Puetz et al., 2018	609	7	97.5962		961	15	105.307
VMC25	VMC25-141	605	14	605	12	603	28	Dinis, et al., 2012	Puetz et al., 2018	605	7	100.332		542	7	105.653
VMC25	VMC25-142	804	18	804	16	805	26	Dinis, et al., 2012	Puetz et al., 2018	804	9	99.8758		728	9	107.852
VMC25	VMC25-143	646	16	655	14	685	34	Dinis, et al., 2012	Puetz et al., 2018	646	8	94.3066		584	9	113.84
VMC25	VMC25-144	613	14	612	14	607	36	Dinis, et al., 2012	Puetz et al., 2018	613	7	100.988		621	10	115.428
														JG1	Ediacaran
JG1	JG1-Z01	802	18	788	42	748	106	Fernandez-Suarez et al., 2000	Puetz et al., 2018	802	9	107.219		1634	32	68.2987
JG1	JG1-Z02	765	12	781	84	810	210	Fernandez-Suarez et al., 2000	Puetz et al., 2018	765	6	94.4444		2772	76	69.4084
JG1	JG1-Z03	734	15	754	36	810	120	Fernandez-Suarez et al., 2000	Puetz et al., 2018	734	7.5	90.6173		579	26	78.4553
JG1	JG1-Z04	750	24	730	50	670	144	Fernandez-Suarez et al., 2000	Puetz et al., 2018	750	12	111.94		911	21	83.1204
JG1	JG1-Z05	973	29	971	96	966	248	Fernandez-Suarez et al., 2000	Puetz et al., 2018	973	14.5	100.725		826	22	85.6846
JG1	JG1-Z06	1024	24	1036	67	1060	108	Fernandez-Suarez et al., 2000	Puetz et al., 2018	1060	54	96.6038		734	7.5	90.6173
JG1	JG1-Z07	943	38	920	55	870	90	Fernandez-Suarez et al., 2000	Puetz et al., 2018	943	19	108.391		700	31.5	92.3483
JG1	JG1-Z08	1924	98	2367	81	2772	152	Fernandez-Suarez et al., 2000	Puetz et al., 2018	2772	76	69.4084		765	6	94.4444
JG1	JG1-Z09	826	44	864	49	964	170	Fernandez-Suarez et al., 2000	Puetz et al., 2018	826	22	85.6846		1060	54	96.6038
JG1	JG1-Z10	1089	61	1034	81	920	218	Fernandez-Suarez et al., 2000	Puetz et al., 2018	920	109	118.37		973	14.5	100.725
JG1	JG1-Z11	911	42	967	55	1096	198	Fernandez-Suarez et al., 2000	Puetz et al., 2018	911	21	83.1204		802	9	107.219
JG1	JG1-Z12	579	52	613	50	738	134	Fernandez-Suarez et al., 2000	Puetz et al., 2018	579	26	78.4553		943	19	108.391
JG1	JG1-Z13	1070	48	1025	44	928	90	Fernandez-Suarez et al., 2000	Puetz et al., 2018	928	45	115.302		934	28.5	109.112
JG1	JG1-Z14	957	55	927	50	856	126	Fernandez-Suarez et al., 2000	Puetz et al., 2018	957	27.5	111.799		778	10	109.577
JG1	JG1-Z15	778	20	761	36	710	160	Fernandez-Suarez et al., 2000	Puetz et al., 2018	778	10	109.577		957	27.5	111.799
JG1	JG1-Z16	934	57	911	47	856	112	Fernandez-Suarez et al., 2000	Puetz et al., 2018	934	28.5	109.112		750	12	111.94
JG1	JG1-Z17	700	63	714	59	758	154	Fernandez-Suarez et al., 2000	Puetz et al., 2018	700	31.5	92.3483		928	45	115.302
JG1	JG1-Z18	1116	7	1307	29	1634	64	Fernandez-Suarez et al., 2000	Puetz et al., 2018	1634	32	68.2987		920	109	118.37
														SJ1	Ediacaran
SJ1	SJ1-Z01	968	24	985	30	1020	84	Fernandez-Suarez et al., 2000	Puetz et al., 2018	968	12	94.902		960	23	43.2432
SJ1	SJ1-Z02	734	26	794	67	966	292	Fernandez-Suarez et al., 2000	Puetz et al., 2018	734	13	75.9834		561	18	53.4286
SJ1	SJ1-Z03	679	13	728	47	884	178	Fernandez-Suarez et al., 2000	Puetz et al., 2018	679	6.5	76.81		485	4.5	62.8238
SJ1	SJ1-Z04	1110	13	1165	22	1268	70	Fernandez-Suarez et al., 2000	Puetz et al., 2018	1268	35	87.5394		899	15.5	63.7589
SJ1	SJ1-Z05	875	16	934	21	1074	72	Fernandez-Suarez et al., 2000	Puetz et al., 2018	875	8	81.4711		478	4	65.1226
SJ1	SJ1-Z06	639	19	649	39	684	176	Fernandez-Suarez et al., 2000	Puetz et al., 2018	639	9.5	93.4211		2462	20	70.0244
SJ1	SJ1-Z07	2283	61	2504	26	2688	50	Fernandez-Suarez et al., 2000	Puetz et al., 2018	2688	25	84.933		734	13	75.9834
SJ1	SJ1-Z08	2048	62	2372	33	2662	46	Fernandez-Suarez et al., 2000	Puetz et al., 2018	2662	23	76.9346		679	6.5	76.81
SJ1	SJ1-Z09	1724	71	2086	34	2462	40	Fernandez-Suarez et al., 2000	Puetz et al., 2018	2462	20	70.0244		2662	23	76.9346
SJ1	SJ1-Z10	1551	29	1748	37	1990	94	Fernandez-Suarez et al., 2000	Puetz et al., 2018	1990	47	77.9397		1990	47	77.9397
SJ1	SJ1-Z11	561	36	669	44	1050	146	Fernandez-Suarez et al., 2000	Puetz et al., 2018	561	18	53.4286		875	8	81.4711
SJ1	SJ1-Z12	485	9	539	26	772	140	Fernandez-Suarez et al., 2000	Puetz et al., 2018	485	4.5	62.8238		2688	25	84.933
SJ1	SJ1-Z13	478	8	525	21	734	110	Fernandez-Suarez et al., 2000	Puetz et al., 2018	478	4	65.1226		727	18	86.342
SJ1	SJ1-Z14	899	31	1061	60	1410	140	Fernandez-Suarez et al., 2000	Puetz et al., 2018	899	15.5	63.7589		1268	35	87.5394
SJ1	SJ1-Z15	759	12	784	26	854	92	Fernandez-Suarez et al., 2000	Puetz et al., 2018	759	6	88.8759		759	6	88.8759
SJ1	SJ1-Z16	1044	77	1044	59	1042	82	Fernandez-Suarez et al., 2000	Puetz et al., 2018	1042	41	100.192		639	9.5	93.4211
SJ1	SJ1-Z17	960	46	1431	86	2220	190	Fernandez-Suarez et al., 2000	Puetz et al., 2018	960	23	43.2432		968	12	94.902
SJ1	SJ1-Z18	1253	57	1210	45	1134	82	Fernandez-Suarez et al., 2000	Puetz et al., 2018	1134	41	110.494		1042	41	100.192
SJ1	SJ1-Z19	727	36	756	40	842	122	Fernandez-Suarez et al., 2000	Puetz et al., 2018	727	18	86.342		1134	41	110.494
														ZD1	Ediacaran
ZD1	ZD1-01	1000	68	953	51	896	59	Gutiérrez-Alonso et al., 2003	Puetz et al., 2018	1000	34	111.607		539	25.5	23.2328
ZD1	ZD1-03	671	28	615	65	1028	60	Gutiérrez-Alonso et al., 2003	Puetz et al., 2018	671	14	65.2724		811	46	32.8606
ZD1	ZD1-05	627	26	615	26	738	40	Gutiérrez-Alonso et al., 2003	Puetz et al., 2018	627	13	84.9593		690	15	53.7383
ZD1	ZD1-09	735	28	796	31	966	31	Gutiérrez-Alonso et al., 2003	Puetz et al., 2018	735	14	76.087		675	13	54.7445
ZD1	ZD1-11	811	92	1370	154	2468	93	Gutiérrez-Alonso et al., 2003	Puetz et al., 2018	811	46	32.8606		597	18	54.8209
ZD1	ZD1-12	936	41	936	27	1167	43	Gutiérrez-Alonso et al., 2003	Puetz et al., 2018	936	20.5	80.2057		671	14	65.2724
ZD1	ZD1-13	724	29	728	35	910	43	Gutiérrez-Alonso et al., 2003	Puetz et al., 2018	724	14.5	79.5604		745	16	74.3513
ZD1	ZD1-14	539	51	878	133	2320	115	Gutiérrez-Alonso et al., 2003	Puetz et al., 2018	539	25.5	23.2328		735	14	76.087
ZD1	ZD1-15	597	36	627	109	1089	59	Gutiérrez-Alonso et al., 2003	Puetz et al., 2018	597	18	54.8209		719	14	78.2372
ZD1	ZD1-16	675	26	714	56	1233	49	Gutiérrez-Alonso et al., 2003	Puetz et al., 2018	675	13	54.7445		724	14.5	79.5604
ZD1	ZD1-17	745	32	796	27	1002	40	Gutiérrez-Alonso et al., 2003	Puetz et al., 2018	745	16	74.3513		936	20.5	80.2057
ZD1	ZD1-18	690	30	719	73	1284	67	Gutiérrez-Alonso et al., 2003	Puetz et al., 2018	690	15	53.7383		627	13	84.9593
ZD1	ZD1-20	640	27	669	31	653	48	Gutiérrez-Alonso et al., 2003	Puetz et al., 2018	640	13.5	98.0092		640	13.5	98.0092
ZD1	ZD1-21	719	28	751	43	919	30	Gutiérrez-Alonso et al., 2003	Puetz et al., 2018	719	14	78.2372		2232	12	101.12
ZD1	ZD1-22	2257	90	2404	93	2232	24	Gutiérrez-Alonso et al., 2003	Puetz et al., 2018	2232	12	101.12		1000	34	111.607
														ZD2	Ediacaran
ZD2	ZD2-02	624	25	727	27	980	36	Gutiérrez-Alonso et al., 2003	Puetz et al., 2018	624	12.5	63.6735		608	25	23.2594
ZD2	ZD2-04	608	50	840	59	2614	16	Gutiérrez-Alonso et al., 2003	Puetz et al., 2018	608	25	23.2594		723	37	27.16
ZD2	ZD2-05	875	58	915	45	1420	59	Gutiérrez-Alonso et al., 2003	Puetz et al., 2018	875	29	61.6197		819	25	43.219
ZD2	ZD2-06	597	58	662	51	803	52	Gutiérrez-Alonso et al., 2003	Puetz et al., 2018	597	29	74.3462		2195	51.5	47.4715
ZD2	ZD2-07	585	51	599	38	628	54	Gutiérrez-Alonso et al., 2003	Puetz et al., 2018	585	25.5	93.1529		875	29	61.6197
ZD2	ZD2-08	819	50	926	167	1895	130	Gutiérrez-Alonso et al., 2003	Puetz et al., 2018	819	25	43.219		624	12.5	63.6735
ZD2	ZD2-09	1042	102	960	87	2195	103	Gutiérrez-Alonso et al., 2003	Puetz et al., 2018	2195	51.5	47.4715		597	29	74.3462
ZD2	ZD2-12	723	74	1382	138	2662	73	Gutiérrez-Alonso et al., 2003	Puetz et al., 2018	723	37	27.16		585	25.5	93.1529
														ZD4	Ediacaran
ZD4	ZD4-01	586	58	636	36	658	41	Gutiérrez-Alonso et al., 2003	Puetz et al., 2018	586	29	89.0578		719	15.5	63.7411
ZD4	ZD4-02	601	54	639	51	799	38	Gutiérrez-Alonso et al., 2003	Puetz et al., 2018	601	27	75.219		598	31.5	68.7356
ZD4	ZD4-03	598	63	690	47	870	106	Gutiérrez-Alonso et al., 2003	Puetz et al., 2018	598	31.5	68.7356		601	27	75.219
ZD4	ZD4-04	581	33	622	23	619	40	Gutiérrez-Alonso et al., 2003	Puetz et al., 2018	581	16.5	93.8611		586	29	89.0578
ZD4	ZD4-06	719	31	792	44	1128	48	Gutiérrez-Alonso et al., 2003	Puetz et al., 2018	719	15.5	63.7411		581	16.5	93.8611
ZD4	ZD4-08	2235	83	2293	39	2269	25	Gutiérrez-Alonso et al., 2003	Puetz et al., 2018	2269	12.5	98.5015		2269	12.5	98.5015
														ALC-1	Ediacaran
ALC-1	ALC1-01.1	599.6	9.8	604.9	12.2	624.5	40.8	Talavera et al., 2015	Puetz et al., 2018	599.6	4.9	96.0128		783.7	6.2	90.3817
ALC-1	ALC1-02.1	653.3	23.4	643.5	19.2	609.1	23.2	Talavera et al., 2015	Puetz et al., 2018	653.3	11.7	107.257		1928.5	18	90.8219
ALC-1	ALC1-03.1	652.6	14.4	667.6	12.8	718.5	19.2	Talavera et al., 2015	Puetz et al., 2018	652.6	7.2	90.8281		652.6	7.2	90.8281
ALC-1	ALC1-04.1	2253	38.2	2264.7	21.8	2275.3	18.4	Talavera et al., 2015	Puetz et al., 2018	2275.3	9.2	99.0199		681.6	5.7	91.2816
ALC-1	ALC1-05.2	2003.5	52.8	1987.9	31.2	1971.9	30.8	Talavera et al., 2015	Puetz et al., 2018	1971.9	15.4	101.603		898.1	11.1	91.6896
ALC-1	ALC1-06.2	1178.5	30.6	1144.4	21.8	1080.5	24	Talavera et al., 2015	Puetz et al., 2018	1080.5	12	109.07		840.8	5.1	91.7003
ALC-1	ALC1-16.1	586.8	3	585.2	4.8	578.7	12.4	Talavera et al., 2015	Puetz et al., 2018	586.8	1.5	101.4		827.3	19.6	92.1783
ALC-1	ALC1-17.1	620.9	10.2	618.3	10.6	608.9	28.8	Talavera et al., 2015	Puetz et al., 2018	620.9	5.1	101.971		761	8.8	92.9522
ALC-1	ALC1-18.1	1941.2	10.8	1936	9.2	1930.3	6.8	Talavera et al., 2015	Puetz et al., 2018	1930.3	3.4	100.565		584	3.9	93.5748
ALC-1	ALC1-19.1	634.8	10	631.6	9.4	620.1	18	Talavera et al., 2015	Puetz et al., 2018	634.8	5	102.371		942.3	7	93.5843
ALC-1	ALC1-20.1	674.4	10.8	668.7	11.8	649.7	34	Talavera et al., 2015	Puetz et al., 2018	674.4	5.4	103.802		755.8	11.1	93.8765
ALC-1	ALC1-21.1	942.5	60.8	946.2	56.2	954.9	119.6	Talavera et al., 2015	Puetz et al., 2018	942.5	30.4	98.7014		586.9	3.9	94.1601
ALC-1	ALC1-22.1	693.1	7.2	696.9	8	709.1	18.8	Talavera et al., 2015	Puetz et al., 2018	693.1	3.6	97.7436		1956.9	6	94.4044
ALC-1	ALC1-22.2	761	17.6	775.8	17.6	818.7	42	Talavera et al., 2015	Puetz et al., 2018	761	8.8	92.9522		659.9	5.9	95.7348
ALC-1	ALC1-23.1	634.4	17.6	630.2	18.2	615.3	52.8	Talavera et al., 2015	Puetz et al., 2018	634.4	8.8	103.104		599.6	4.9	96.0128
ALC-1	ALC1-24.1	2036.6	29.8	2028.2	18	2019.7	15.6	Talavera et al., 2015	Puetz et al., 2018	2019.7	7.8	100.837		697.9	4.4	97.5675
ALC-1	ALC1-25.1	605.6	6	601.6	6.6	586.7	15.6	Talavera et al., 2015	Puetz et al., 2018	605.6	3	103.221		693.1	3.6	97.7436
ALC-1	ALC1-26.1	827.3	39.2	846.6	35.6	897.5	72	Talavera et al., 2015	Puetz et al., 2018	827.3	19.6	92.1783		775.2	2	98.2136
ALC-1	ALC1-27.1	942.3	14	961.8	14.4	1006.9	30.8	Talavera et al., 2015	Puetz et al., 2018	942.3	7	93.5843		605.2	6.4	98.5186
ALC-1	ALC1-28.1	627.7	6.4	623	8.2	606.1	26.8	Talavera et al., 2015	Puetz et al., 2018	627.7	3.2	103.564		598.6	2.3	98.5674
ALC-1	ALC1-29.1	2541.7	49.6	2536.2	30	2531.9	34.4	Talavera et al., 2015	Puetz et al., 2018	2531.9	17.2	100.387		1946.1	13.8	98.5818
ALC-1	ALC1-30.1	631.4	13.4	631.9	11.8	633.5	18.8	Talavera et al., 2015	Puetz et al., 2018	631.4	6.7	99.6685		2772.5	13.8	98.6727
ALC-1	ALC1-31.1	1847.4	22	1899.6	14.6	1956.9	12	Talavera et al., 2015	Puetz et al., 2018	1956.9	6	94.4044		942.5	30.4	98.7014
ALC-1	ALC1-32.1	681.6	11.4	696.9	14.2	746.7	44	Talavera et al., 2015	Puetz et al., 2018	681.6	5.7	91.2816		621	7	98.9641
ALC-1	ALC1-33.1	2748.1	71	2709.3	36.6	2680.5	34.4	Talavera et al., 2015	Puetz et al., 2018	2680.5	17.2	102.522		2275.3	9.2	99.0199
ALC-1	ALC1-34.1	1751.5	22.6	1833.8	22.2	1928.5	36	Talavera et al., 2015	Puetz et al., 2018	1928.5	18	90.8219		2701.1	9	99.067
ALC-1	ALC1-35.1	789.2	6.2	787.9	8.4	784.1	22.4	Talavera et al., 2015	Puetz et al., 2018	789.2	3.1	100.65		845.8	6.9	99.3773
ALC-1	ALC1-35.2	898.1	22.2	922	18.8	979.5	28	Talavera et al., 2015	Puetz et al., 2018	898.1	11.1	91.6896		3010.9	9.2	99.4221
ALC-1	ALC1-36.1	845.8	13.8	847.3	14.8	851.1	35.6	Talavera et al., 2015	Puetz et al., 2018	845.8	6.9	99.3773		812.7	9.4	99.6078
ALC-1	ALC1-37.1	783.7	12.4	805.7	13.8	867.1	34.8	Talavera et al., 2015	Puetz et al., 2018	783.7	6.2	90.3817		631.4	6.7	99.6685
ALC-1	ALC1-38.2	584	7.8	592.3	9	624.1	26	Talavera et al., 2015	Puetz et al., 2018	584	3.9	93.5748		2012.3	7.8	100.055
ALC-1	ALC1-39.1	598.6	4.6	600.5	5.8	607.3	13.2	Talavera et al., 2015	Puetz et al., 2018	598.6	2.3	98.5674		2103.7	4	100.371
ALC-1	ALC1-40.1	682.8	15.4	680.2	13.4	671.7	23.2	Talavera et al., 2015	Puetz et al., 2018	682.8	7.7	101.653		2531.9	17.2	100.387
ALC-1	ALC1-41.1	659.9	11.8	666.6	14.6	689.3	46.8	Talavera et al., 2015	Puetz et al., 2018	659.9	5.9	95.7348		1930.3	3.4	100.565
ALC-1	ALC1-42.1	2735.7	49.8	2756.8	27.2	2772.5	27.6	Talavera et al., 2015	Puetz et al., 2018	2772.5	13.8	98.6727		2618.5	7.2	100.607
ALC-1	ALC1-43.1	697.9	8.8	702	8.4	715.3	14	Talavera et al., 2015	Puetz et al., 2018	697.9	4.4	97.5675		789.2	3.1	100.65
ALC-1	ALC1-44.1	2111.5	25.6	2107.6	14.8	2103.7	8	Talavera et al., 2015	Puetz et al., 2018	2103.7	4	100.371		633.3	5	100.828
ALC-1	ALC1-45.1	586.9	7.8	594.4	8.8	623.3	24.8	Talavera et al., 2015	Puetz et al., 2018	586.9	3.9	94.1601		2019.7	7.8	100.837
ALC-1	ALC1-46.1	2675.9	73.4	2690.3	34.2	2701.1	18	Talavera et al., 2015	Puetz et al., 2018	2701.1	9	99.067		586.8	1.5	101.4
ALC-1	ALC1-47.1	1000.2	13.8	991.3	11.8	971.7	17.2	Talavera et al., 2015	Puetz et al., 2018	971.7	8.6	102.933		1971.9	15.4	101.603
ALC-1	ALC1-48.1	840.8	10.2	862	11.2	916.9	25.2	Talavera et al., 2015	Puetz et al., 2018	840.8	5.1	91.7003		682.8	7.7	101.653
ALC-1	ALC1-49.1	812.7	18.8	813.6	16.4	815.9	28.8	Talavera et al., 2015	Puetz et al., 2018	812.7	9.4	99.6078		2194.1	16	101.714
ALC-1	ALC1-50.2	2993.5	20.8	3003.9	15.4	3010.9	18.4	Talavera et al., 2015	Puetz et al., 2018	3010.9	9.2	99.4221		620.9	5.1	101.971
ALC-1	ALC1-51.1	996.5	22.4	968.5	18.8	905.5	33.2	Talavera et al., 2015	Puetz et al., 2018	996.5	11.2	110.05		641.2	3.5	101.988
ALC-1	ALC1-52.1	641.2	7	638.5	7.6	628.7	16.8	Talavera et al., 2015	Puetz et al., 2018	641.2	3.5	101.988		818.4	7.4	102.007
ALC-1	ALC1-53.1	579.4	12.8	571.1	14.6	537.9	48.8	Talavera et al., 2015	Puetz et al., 2018	579.4	6.4	107.715		634.8	5	102.371
ALC-1	ALC1-54.1	2013.4	33.2	2012.8	19.6	2012.3	15.6	Talavera et al., 2015	Puetz et al., 2018	2012.3	7.8	100.055		732.5	6.8	102.405
ALC-1	ALC1-55.1	775.2	4	778.9	8.8	789.3	27.6	Talavera et al., 2015	Puetz et al., 2018	775.2	2	98.2136		2680.5	17.2	102.522
ALC-1	ALC1-56.1	2231.7	31.2	2212.2	23.2	2194.1	32	Talavera et al., 2015	Puetz et al., 2018	2194.1	16	101.714		971.7	8.6	102.933
ALC-1	ALC1-57.1	2634.4	31.2	2625.4	17.2	2618.5	14.4	Talavera et al., 2015	Puetz et al., 2018	2618.5	7.2	100.607		634.4	8.8	103.104
ALC-1	ALC1-58.1	623.9	5.6	618.6	9	599.3	34	Talavera et al., 2015	Puetz et al., 2018	623.9	2.8	104.105		605.6	3	103.221
ALC-1	ALC1-59.1	605.2	12.8	607.1	12.8	614.3	32.8	Talavera et al., 2015	Puetz et al., 2018	605.2	6.4	98.5186		627.7	3.2	103.564
ALC-1	ALC1-60.1	621	14	622.4	14.8	627.5	42.8	Talavera et al., 2015	Puetz et al., 2018	621	7	98.9641		674.4	5.4	103.802
ALC-1	ALC1-61.1	619.1	10.6	610.8	17	580.5	69.2	Talavera et al., 2015	Puetz et al., 2018	619.1	5.3	106.649		623.9	2.8	104.105
ALC-1	ALC1-62.1	827.1	6.6	816.2	9.2	786.9	26	Talavera et al., 2015	Puetz et al., 2018	827.1	3.3	105.109		642.1	2.4	104.935
ALC-1	ALC1-63.1	1918.5	23	1931.8	19	1946.1	27.6	Talavera et al., 2015	Puetz et al., 2018	1946.1	13.8	98.5818		827.1	3.3	105.109
ALC-1	ALC1-64.1	626	4.4	609	8.4	546.1	32	Talavera et al., 2015	Puetz et al., 2018	626	2.2	114.631		574.9	3.3	106.207
ALC-1	ALC1-64.2	818.4	14.8	814.1	17.4	802.3	48.4	Talavera et al., 2015	Puetz et al., 2018	818.4	7.4	102.007		619.1	5.3	106.649
ALC-1	ALC1-65.1	633.3	10	632.2	12.2	628.1	40.4	Talavera et al., 2015	Puetz et al., 2018	633.3	5	100.828		653.3	11.7	107.257
ALC-1	ALC1-65.2	642.1	4.8	635.4	8.4	611.9	31.6	Talavera et al., 2015	Puetz et al., 2018	642.1	2.4	104.935		579.4	6.4	107.715
ALC-1	ALC1-66.1	732.5	13.6	728.3	15.6	715.3	45.6	Talavera et al., 2015	Puetz et al., 2018	732.5	6.8	102.405		1080.5	12	109.07
ALC-1	ALC1-66.2	752.6	24.8	735.5	25.6	683.7	70.4	Talavera et al., 2015	Puetz et al., 2018	752.6	12.4	110.078		996.5	11.2	110.05
ALC-1	ALC1-67.1	755.8	22.2	768.4	21.4	805.1	49.6	Talavera et al., 2015	Puetz et al., 2018	755.8	11.1	93.8765		752.6	12.4	110.078
ALC-1	ALC1-68.1	574.9	6.6	568.2	6.4	541.3	8	Talavera et al., 2015	Puetz et al., 2018	574.9	3.3	106.207		626	2.2	114.631
														ALC-2	Ediacaran
ALC-2	ALC2-01.1	1890.3	10.6	1895.3	9.2	1900.9	9.2	Talavera et al., 2015	Puetz et al., 2018	1900.9	4.6	99.4424		615.6	3.7	82.2225
ALC-2	ALC2-02.1	947.8	20.6	965.5	17	1006.1	24.8	Talavera et al., 2015	Puetz et al., 2018	947.8	10.3	94.2053		596.8	8.6	86.8073
ALC-2	ALC2-03.1	704.3	12.6	716	11.8	752.7	21.2	Talavera et al., 2015	Puetz et al., 2018	704.3	6.3	93.5698		602.9	10.6	87.1369
ALC-2	ALC2-04.1	600.8	11.6	603.8	13.8	615.3	46.4	Talavera et al., 2015	Puetz et al., 2018	600.8	5.8	97.6434		601.7	10.3	87.2661
ALC-2	ALC2-05.1	602.9	21.2	622	21.4	691.9	55.6	Talavera et al., 2015	Puetz et al., 2018	602.9	10.6	87.1369		854.9	10.9	90.6671
ALC-2	ALC2-06.1	1859.9	14	1894.9	11	1933.5	10.4	Talavera et al., 2015	Puetz et al., 2018	1933.5	5.2	96.1934		613.7	10	91.2837
ALC-2	ALC2-07.1	2308.6	72.6	2313.2	39.8	2317.3	35.2	Talavera et al., 2015	Puetz et al., 2018	2317.3	17.6	99.6246		563.1	3.1	91.7848
ALC-2	ALC2-08.1	854.9	21.8	879.8	21.2	942.9	45.2	Talavera et al., 2015	Puetz et al., 2018	854.9	10.9	90.6671		757.2	9.4	93.2398
ALC-2	ALC2-09.1	563.1	6.2	573.2	6.8	613.5	16.4	Talavera et al., 2015	Puetz et al., 2018	563.1	3.1	91.7848		621	5.1	93.5382
ALC-2	ALC2-10.1	577.7	10.8	576.5	10	571.9	21.2	Talavera et al., 2015	Puetz et al., 2018	577.7	5.4	101.014		704.3	6.3	93.5698
ALC-2	ALC2-11.1	625.4	11.2	633.5	11.8	662.5	31.6	Talavera et al., 2015	Puetz et al., 2018	625.4	5.6	94.4		617.4	4.1	93.588
ALC-2	ALC2-12.1	570.4	18	576.6	19.4	601.1	62	Talavera et al., 2015	Puetz et al., 2018	570.4	9	94.8927		661.3	9.1	94.1084
ALC-2	ALC2-13.1	613.7	20	626.3	18.8	672.3	42.4	Talavera et al., 2015	Puetz et al., 2018	613.7	10	91.2837		947.8	10.3	94.2053
ALC-2	ALC2-14.1	825.7	13.4	825	11.8	823.1	19.2	Talavera et al., 2015	Puetz et al., 2018	825.7	6.7	100.316		625.4	5.6	94.4
ALC-2	ALC2-15.1	632.8	11.8	624.9	13.8	596.3	44.8	Talavera et al., 2015	Puetz et al., 2018	632.8	5.9	106.121		602.1	6.4	94.8338
ALC-2	ALC2-16.1	1955.9	42.8	1978.7	27.6	2002.7	31.6	Talavera et al., 2015	Puetz et al., 2018	2002.7	15.8	97.6632		570.4	9	94.8927
ALC-2	ALC2-17.1	602.1	12.8	609	11.8	634.9	24	Talavera et al., 2015	Puetz et al., 2018	602.1	6.4	94.8338		552.7	2.1	95.1127
ALC-2	ALC2-17.2	596.8	17.2	616	21.4	687.5	74	Talavera et al., 2015	Puetz et al., 2018	596.8	8.6	86.8073		609.8	6	95.535
ALC-2	ALC2-18.1	615.6	7.4	644.9	13.6	748.7	52	Talavera et al., 2015	Puetz et al., 2018	615.6	3.7	82.2225		867.1	19.8	95.6325
ALC-2	ALC2-19.1	609.8	12	615.9	13.2	638.3	38.4	Talavera et al., 2015	Puetz et al., 2018	609.8	6	95.535		1933.5	5.2	96.1934
ALC-2	ALC2-20.1	1993	63.6	1962.8	36	1931.1	30	Talavera et al., 2015	Puetz et al., 2018	1931.1	15	103.205		622.6	4.5	96.7822
ALC-2	ALC2-21.1	621	10.2	630.3	9.8	663.9	19.2	Talavera et al., 2015	Puetz et al., 2018	621	5.1	93.5382		581.4	3.2	96.8839
ALC-2	ALC2-22.1	601.7	20.6	620.4	18.4	689.5	32.4	Talavera et al., 2015	Puetz et al., 2018	601.7	10.3	87.2661		760.7	6.4	97.3883
ALC-2	ALC2-24.1	2002.8	51.4	2003.4	27.8	2003.9	12.4	Talavera et al., 2015	Puetz et al., 2018	2003.9	6.2	99.9451		600.8	5.8	97.6434
ALC-2	ALC2-25.1	760.7	12.8	765.9	15.4	781.1	44.8	Talavera et al., 2015	Puetz et al., 2018	760.7	6.4	97.3883		2002.7	15.8	97.6632
ALC-2	ALC2-26.1	726.1	11	721.8	10.2	708.5	20	Talavera et al., 2015	Puetz et al., 2018	726.1	5.5	102.484		599.1	7	98.0363
ALC-2	ALC2-27.1	599.1	14	601.6	13.8	611.1	36.4	Talavera et al., 2015	Puetz et al., 2018	599.1	7	98.0363		561.7	4.5	98.4575
ALC-2	ALC2-28.1	867.1	39.6	878.3	33	906.7	54.8	Talavera et al., 2015	Puetz et al., 2018	867.1	19.8	95.6325		1900.9	4.6	99.4424
ALC-2	ALC2-29.1	617.4	8.2	626.5	12.8	659.7	48.4	Talavera et al., 2015	Puetz et al., 2018	617.4	4.1	93.588		2317.3	17.6	99.6246
ALC-2	ALC2-30.1	571	5.8	568	10.4	556.1	45.2	Talavera et al., 2015	Puetz et al., 2018	571	2.9	102.679		2003.9	6.2	99.9451
ALC-2	ALC2-31.1	757.5	10.2	757.5	12.2	757.5	35.2	Talavera et al., 2015	Puetz et al., 2018	757.5	5.1	100		757.5	5.1	100
ALC-2	ALC2-32.1	757.2	18.8	771.2	15	812.1	10	Talavera et al., 2015	Puetz et al., 2018	757.2	9.4	93.2398		825.7	6.7	100.316
ALC-2	ALC2-33.1	622.6	9	627.1	9.2	643.3	21.2	Talavera et al., 2015	Puetz et al., 2018	622.6	4.5	96.7822		577.7	5.4	101.014
ALC-2	ALC2-34.1	581.4	6.4	585.2	6.6	600.1	12.4	Talavera et al., 2015	Puetz et al., 2018	581.4	3.2	96.8839		726.1	5.5	102.484
ALC-2	ALC2-35.1	552.7	4.2	558.3	7.4	581.1	29.6	Talavera et al., 2015	Puetz et al., 2018	552.7	2.1	95.1127		571	2.9	102.679
ALC-2	ALC2-36.1	561.7	9	563.5	8.4	570.5	14.8	Talavera et al., 2015	Puetz et al., 2018	561.7	4.5	98.4575		934.8	8.7	103.099
ALC-2	ALC2-37.1	934.8	17.4	926.5	15.4	906.7	27.6	Talavera et al., 2015	Puetz et al., 2018	934.8	8.7	103.099		1931.1	15	103.205
ALC-2	ALC2-43.1	661.3	18.2	670.7	17.4	702.7	41.6	Talavera et al., 2015	Puetz et al., 2018	661.3	9.1	94.1084		632.8	5.9	106.121
														ALC-3	Ediacaran
ALC-3	ALC3-01.1	652.2	6	647.4	7.6	630.9	22.4	Talavera et al., 2015	Puetz et al., 2018	652.2	3	103.376		704.6	5.5	87.1059
ALC-3	ALC3-02.1	2472.3	18.8	2493.5	11.6	2510.7	6.8	Talavera et al., 2015	Puetz et al., 2018	2510.7	3.4	98.4705		592.3	8.5	88.8672
ALC-3	ALC3-03.1	633.5	3.6	631.7	13.8	625.1	60	Talavera et al., 2015	Puetz et al., 2018	633.5	1.8	101.344		2124.9	2.6	90.8843
ALC-3	ALC3-04.1	627	2.4	628.8	4.8	635.5	13.2	Talavera et al., 2015	Puetz et al., 2018	627	1.2	98.6625		633.1	7.3	91.0019
ALC-3	ALC3-05.1	640.7	22.6	649.9	19.8	681.7	32.8	Talavera et al., 2015	Puetz et al., 2018	640.7	11.3	93.9856		640	4.2	91.2071
ALC-3	ALC3-06.1	645.6	10.4	654.7	11.2	686.1	30.4	Talavera et al., 2015	Puetz et al., 2018	645.6	5.2	94.0971		674.2	6.7	91.8153
ALC-3	ALC3-07.1	581.7	9.2	577.7	9.6	561.9	26.8	Talavera et al., 2015	Puetz et al., 2018	581.7	4.6	103.524		1994.1	11	92.0566
ALC-3	ALC3-08.1	901.6	0.2	907.4	7.8	921.7	22.4	Talavera et al., 2015	Puetz et al., 2018	901.6	0.1	97.8192		697.9	12.3	92.7442
ALC-3	ALC3-08.2	904.4	15.8	894.5	14.4	870.1	27.2	Talavera et al., 2015	Puetz et al., 2018	904.4	7.9	103.942		588.7	5	92.8695
ALC-3	ALC3-09.1	588.7	10	598.1	9.6	633.9	19.6	Talavera et al., 2015	Puetz et al., 2018	588.7	5	92.8695		590.9	3.7	93.3639
ALC-3	ALC3-09.2	1835.7	29.8	1911.2	20.4	1994.1	22	Talavera et al., 2015	Puetz et al., 2018	1994.1	11	92.0566		2636.5	8.6	93.499
ALC-3	ALC3-10.1	634.4	26.6	635.1	22	637.7	27.6	Talavera et al., 2015	Puetz et al., 2018	634.4	13.3	99.4825		916.2	9.3	93.7865
ALC-3	ALC3-12.2	642.5	12.2	638.8	10.8	625.5	16.8	Talavera et al., 2015	Puetz et al., 2018	642.5	6.1	102.718		640.7	11.3	93.9856
ALC-3	ALC3-13.1	597.2	2.2	598.6	3.8	603.9	4	Talavera et al., 2015	Puetz et al., 2018	597.2	1.1	98.8905		645.6	5.2	94.0971
ALC-3	ALC3-16.1	640	8.4	653.8	7.8	701.7	10.4	Talavera et al., 2015	Puetz et al., 2018	640	4.2	91.2071		785.4	2.7	94.5923
ALC-3	ALC3-18.1	633.1	14.6	647	15.4	695.7	41.2	Talavera et al., 2015	Puetz et al., 2018	633.1	7.3	91.0019		994	7	95.0196
ALC-3	ALC3-19.1	2049.6	31.2	2020.6	19.4	1991.1	18.8	Talavera et al., 2015	Puetz et al., 2018	1991.1	9.4	102.938		2564.5	7.4	96.3658
ALC-3	ALC3-20.1	674.2	13.4	688.2	11.2	734.3	7.2	Talavera et al., 2015	Puetz et al., 2018	674.2	6.7	91.8153		2091.7	6	96.6917
ALC-3	ALC3-21.1	680.3	4.6	678.4	11.4	672.1	44.8	Talavera et al., 2015	Puetz et al., 2018	680.3	2.3	101.22		689.1	5.1	96.9062
ALC-3	ALC3-22.1	591.3	4.4	590.1	5	585.5	8	Talavera et al., 2015	Puetz et al., 2018	591.3	2.2	100.991		629.4	1.6	97.2347
ALC-3	ALC3-22.1	590.9	7.4	599.7	7	632.9	8	Talavera et al., 2015	Puetz et al., 2018	590.9	3.7	93.3639		680.4	3.1	97.6884
ALC-3	ALC3-23.1	629.4	3.2	633.3	5.8	647.3	17.6	Talavera et al., 2015	Puetz et al., 2018	629.4	1.6	97.2347		901.6	0.1	97.8192
ALC-3	ALC3-24.1	833.9	25.8	830	22	819.7	39.2	Talavera et al., 2015	Puetz et al., 2018	833.9	12.9	101.732		2510.7	3.4	98.4705
ALC-3	ALC3-25.2	2471.3	40.4	2522.8	21.2	2564.5	14.8	Talavera et al., 2015	Puetz et al., 2018	2564.5	7.4	96.3658		627	1.2	98.6625
ALC-3	ALC3-26.1	2465.1	48.6	2560.2	25.2	2636.5	17.2	Talavera et al., 2015	Puetz et al., 2018	2636.5	8.6	93.499		597.2	1.1	98.8905
ALC-3	ALC3-27.1	592.3	17	607.9	17	666.5	43.6	Talavera et al., 2015	Puetz et al., 2018	592.3	8.5	88.8672		634.4	13.3	99.4825
ALC-3	ALC3-28.1	636	9	628.8	10.2	603.1	31.6	Talavera et al., 2015	Puetz et al., 2018	636	4.5	105.455		607.7	5.5	99.5414
ALC-3	ALC3-32.1	833.2	12.6	829.6	11.6	819.9	20.4	Talavera et al., 2015	Puetz et al., 2018	833.2	6.3	101.622		637.3	4.1	100.063
ALC-3	ALC3-33.1	697.9	24.6	711	21	752.5	30.8	Talavera et al., 2015	Puetz et al., 2018	697.9	12.3	92.7442		2112.7	6.2	100.871
ALC-3	ALC3-34.1	579.5	13.2	577	12.2	566.9	24.8	Talavera et al., 2015	Puetz et al., 2018	579.5	6.6	102.223		591.3	2.2	100.991
ALC-3	ALC3-36.1	689.1	10.2	694.2	10.8	711.1	27.6	Talavera et al., 2015	Puetz et al., 2018	689.1	5.1	96.9062		680.3	2.3	101.22
ALC-3	ALC3-37.1	916.2	18.6	934.2	15	976.9	18.4	Talavera et al., 2015	Puetz et al., 2018	916.2	9.3	93.7865		633.5	1.8	101.344
ALC-3	ALC3-38.1	994	14	1010.4	11.4	1046.1	11.2	Talavera et al., 2015	Puetz et al., 2018	994	7	95.0196		833.2	6.3	101.622
ALC-3	ALC3-40.1	785.4	5.4	797.2	6.2	830.3	8.4	Talavera et al., 2015	Puetz et al., 2018	785.4	2.7	94.5923		833.9	12.9	101.732
ALC-3	ALC3-41.1	744.1	11.6	739.8	10.2	726.5	13.2	Talavera et al., 2015	Puetz et al., 2018	744.1	5.8	102.423		579.5	6.6	102.223
ALC-3	ALC3-42.1	2022.5	35.4	2057	20.2	2091.7	12	Talavera et al., 2015	Puetz et al., 2018	2091.7	6	96.6917		744.1	5.8	102.423
ALC-3	ALC3-43.1	2131.1	35	2121.8	19.4	2112.7	12.4	Talavera et al., 2015	Puetz et al., 2018	2112.7	6.2	100.871		642.5	6.1	102.718
ALC-3	ALC3-44.1	680.4	6.2	684.1	8.2	696.5	24.8	Talavera et al., 2015	Puetz et al., 2018	680.4	3.1	97.6884		1991.1	9.4	102.938
ALC-3	ALC3-45.1	1931.2	54.8	2026.5	29.8	2124.9	5.2	Talavera et al., 2015	Puetz et al., 2018	2124.9	2.6	90.8843		652.2	3	103.376
ALC-3	ALC3-46.1	704.6	11	730	24.8	808.9	93.6	Talavera et al., 2015	Puetz et al., 2018	704.6	5.5	87.1059		581.7	4.6	103.524
ALC-3	ALC3-47.1	607.7	11	608.2	10.4	610.5	24	Talavera et al., 2015	Puetz et al., 2018	607.7	5.5	99.5414		904.4	7.9	103.942
ALC-3	ALC3-48.1	637.3	8.2	637.2	8.4	636.9	18.8	Talavera et al., 2015	Puetz et al., 2018	637.3	4.1	100.063		636	4.5	105.455
														ALC-4	Ediacaran
ALC-4	ALC4-01.1	819.6	16.6	843.9	18.6	908.3	47.6	Talavera et al., 2015	Puetz et al., 2018	819.6	8.3	90.2345		635.5	7.1	82.8229
ALC-4	ALC4-02.1	619.8	6	627.6	7.4	655.7	21.2	Talavera et al., 2015	Puetz et al., 2018	619.8	3	94.5249		618	6.1	83.8876
ALC-4	ALC4-03.1	810.2	14.6	833.6	12.8	896.5	18.8	Talavera et al., 2015	Puetz et al., 2018	810.2	7.3	90.3737		681.3	5.5	84.4343
ALC-4	ALC4-04.1	615.3	13	624	12.8	655.5	30.4	Talavera et al., 2015	Puetz et al., 2018	615.3	6.5	93.8673		593	5.9	87.6311
ALC-4	ALC4-05.1	2528	47	2530	31.2	2531.5	39.2	Talavera et al., 2015	Puetz et al., 2018	2531.5	19.6	99.8617		819.6	8.3	90.2345
ALC-4	ALC4-06.1	596.4	6.8	591.7	8.2	573.7	26.4	Talavera et al., 2015	Puetz et al., 2018	596.4	3.4	103.957		756.2	9.5	90.3573
ALC-4	ALC4-07.1	579.2	5	577.4	6.6	570.5	20.8	Talavera et al., 2015	Puetz et al., 2018	579.2	2.5	101.525		810.2	7.3	90.3737
ALC-4	ALC4-08.1	590.1	8.6	593.7	9.4	607.3	24.8	Talavera et al., 2015	Puetz et al., 2018	590.1	4.3	97.1678		555.5	5.6	92.6606
ALC-4	ALC4-09.1	2353.7	23.6	2363.5	13.6	2371.9	8.8	Talavera et al., 2015	Puetz et al., 2018	2371.9	4.4	99.2327		637.2	2.9	93.4722
ALC-4	ALC4-10.1	756.2	19	776.9	18.4	836.9	40.4	Talavera et al., 2015	Puetz et al., 2018	756.2	9.5	90.3573		615.3	6.5	93.8673
ALC-4	ALC4-11.1	629.6	2.4	631.7	5.2	639.1	16	Talavera et al., 2015	Puetz et al., 2018	629.6	1.2	98.5135		619.8	3	94.5249
ALC-4	ALC4-12.1	637.2	5.8	647.1	8.4	681.7	27.2	Talavera et al., 2015	Puetz et al., 2018	637.2	2.9	93.4722		2756.1	3	94.5321
ALC-4	ALC4-13.1	635.5	14.2	665.3	13.2	767.3	22.8	Talavera et al., 2015	Puetz et al., 2018	635.5	7.1	82.8229		952.5	4.3	95.1643
ALC-4	ALC4-14.1	644.6	10.8	651.6	10	676.1	17.2	Talavera et al., 2015	Puetz et al., 2018	644.6	5.4	95.3409		644.6	5.4	95.3409
ALC-4	ALC4-15.1	618	12.2	644.1	14.6	736.7	44.8	Talavera et al., 2015	Puetz et al., 2018	618	6.1	83.8876		630.3	8.5	96.0677
ALC-4	ALC4-16.1	608.2	8	613.5	9.2	632.9	27.2	Talavera et al., 2015	Puetz et al., 2018	608.2	4	96.0973		608.2	4	96.0973
ALC-4	ALC4-17.1	2605.4	20.8	2691.1	12	2756.1	6	Talavera et al., 2015	Puetz et al., 2018	2756.1	3	94.5321		590.1	4.3	97.1678
ALC-4	ALC4-18.1	618.4	8.8	620.3	8.6	627.3	18	Talavera et al., 2015	Puetz et al., 2018	618.4	4.4	98.5812		622.2	5.1	97.8764
ALC-4	ALC4-19.1	617.6	5.8	609.4	6.2	578.9	12.4	Talavera et al., 2015	Puetz et al., 2018	617.6	2.9	106.685		562.5	1.3	98.1847
ALC-4	ALC4-20.1	576.2	9.2	568.5	9.2	537.7	23.6	Talavera et al., 2015	Puetz et al., 2018	576.2	4.6	107.16		622.3	4.5	98.3252
ALC-4	ALC4-21.1	616.6	8.2	610.5	8.8	587.9	24	Talavera et al., 2015	Puetz et al., 2018	616.6	4.1	104.882		629.6	1.2	98.5135
ALC-4	ALC4-22.1	622.2	10.2	625.2	13	635.7	43.6	Talavera et al., 2015	Puetz et al., 2018	622.2	5.1	97.8764		618.4	4.4	98.5812
ALC-4	ALC4-23.1	622.3	9	624.6	10.6	632.9	32.8	Talavera et al., 2015	Puetz et al., 2018	622.3	4.5	98.3252		2371.9	4.4	99.2327
ALC-4	ALC4-24.1	2199.9	18.2	2207	14.2	2213.7	17.6	Talavera et al., 2015	Puetz et al., 2018	2213.7	8.8	99.3766		2213.7	8.8	99.3766
ALC-4	ALC4-25.1	593	11.8	610.7	13.4	676.7	40	Talavera et al., 2015	Puetz et al., 2018	593	5.9	87.6311		2531.5	19.6	99.8617
ALC-4	ALC4-26.1	555.5	11.2	564.2	11.8	599.5	33.6	Talavera et al., 2015	Puetz et al., 2018	555.5	5.6	92.6606		2447.1	4.2	100.135
ALC-4	ALC4-27.1	2450.4	37	2448.6	18.6	2447.1	8.4	Talavera et al., 2015	Puetz et al., 2018	2447.1	4.2	100.135		1997.3	2.2	100.981
ALC-4	ALC4-28.1	562.5	2.6	564.6	7.6	572.9	32.8	Talavera et al., 2015	Puetz et al., 2018	562.5	1.3	98.1847		579.2	2.5	101.525
ALC-4	ALC4-31.1	952.5	8.6	967.3	8.6	1000.9	12	Talavera et al., 2015	Puetz et al., 2018	952.5	4.3	95.1643		596.4	3.4	103.957
ALC-4	ALC4-37.1	2016.9	11	2007.2	8.6	1997.3	4.4	Talavera et al., 2015	Puetz et al., 2018	1997.3	2.2	100.981		616.6	4.1	104.882
ALC-4	ALC4-38.1	630.3	17	636	16.2	656.1	37.6	Talavera et al., 2015	Puetz et al., 2018	630.3	8.5	96.0677		617.6	2.9	106.685
ALC-4	ALC4-39.1	681.3	11	711.2	11.8	806.9	29.2	Talavera et al., 2015	Puetz et al., 2018	681.3	5.5	84.4343		576.2	4.6	107.16
														ALC-5	Ediacaran
ALC-5	ALC5-01.1	836	9.6	840.7	10.4	853.1	23.2	Talavera et al., 2015	Puetz et al., 2018	836	4.8	97.9955		565.2	4.7	84.9286
ALC-5	ALC5-02.1	1866.8	22.2	1867.2	14.8	1867.5	13.6	Talavera et al., 2015	Puetz et al., 2018	1867.5	6.8	99.9625		579.3	4.9	89.5502
ALC-5	ALC5-03.1	565.2	9.4	585.6	13.6	665.5	51.6	Talavera et al., 2015	Puetz et al., 2018	565.2	4.7	84.9286		566.5	2.2	91.4447
ALC-5	ALC5-04.1	575.2	15.2	579.4	15.4	595.9	43.2	Talavera et al., 2015	Puetz et al., 2018	575.2	7.6	96.5263		585.4	5.6	92.4949
ALC-5	ALC5-05.1	556	7	562.6	7.8	589.5	22.4	Talavera et al., 2015	Puetz et al., 2018	556	3.5	94.3172		790.3	12.2	92.9874
ALC-5	ALC5-07.1	2666.9	76.6	2652.2	35.8	2640.9	20	Talavera et al., 2015	Puetz et al., 2018	2640.9	10	100.985		563.1	3.3	94.0852
ALC-5	ALC5-08.1	1816.9	29.2	1831.9	20	1849.1	23.2	Talavera et al., 2015	Puetz et al., 2018	1849.1	11.6	98.2586		556	3.5	94.3172
ALC-5	ALC5-11.1	963.2	18.8	975.3	16.4	1002.5	28	Talavera et al., 2015	Puetz et al., 2018	963.2	9.4	96.0798		790	3.7	94.8266
ALC-5	ALC5-12.1	860.5	14	872	13.2	901.3	25.2	Talavera et al., 2015	Puetz et al., 2018	860.5	7	95.4732		659.8	8.1	94.9762
ALC-5	ALC5-13.1	659.8	16.2	667.7	15.6	694.7	38.4	Talavera et al., 2015	Puetz et al., 2018	659.8	8.1	94.9762		860.5	7	95.4732
ALC-5	ALC5-14.1	576.8	8.6	577.8	8.2	581.9	14.8	Talavera et al., 2015	Puetz et al., 2018	576.8	4.3	99.1236		591.7	4.7	95.636
ALC-5	ALC5-15.1	585.4	11.2	595.3	13.4	632.9	44	Talavera et al., 2015	Puetz et al., 2018	585.4	5.6	92.4949		634	3.6	95.8428
ALC-5	ALC5-16.1	790.3	24.4	806.1	22	849.9	42	Talavera et al., 2015	Puetz et al., 2018	790.3	12.2	92.9874		580.2	2.3	95.9167
ALC-5	ALC5-17.1	1725.1	17.4	1727.6	13.4	1730.7	16	Talavera et al., 2015	Puetz et al., 2018	1730.7	8	99.6764		2419.3	4.2	95.941
ALC-5	ALC5-18.1	559.6	6.2	560.1	7.2	562.3	21.2	Talavera et al., 2015	Puetz et al., 2018	559.6	3.1	99.5198		963.2	9.4	96.0798
ALC-5	ALC5-19.1	563.1	6.6	570.2	7.8	598.5	22.4	Talavera et al., 2015	Puetz et al., 2018	563.1	3.3	94.0852		575.2	7.6	96.5263
ALC-5	ALC5-20.1	566.5	4.4	577.2	6.6	619.5	22.4	Talavera et al., 2015	Puetz et al., 2018	566.5	2.2	91.4447		953.9	5.4	97.6856
ALC-5	ALC5-21.1	634	7.2	640.1	8.6	661.5	23.6	Talavera et al., 2015	Puetz et al., 2018	634	3.6	95.8428		836	4.8	97.9955
ALC-5	ALC5-22.1	596	10.6	594	11	586.5	31.6	Talavera et al., 2015	Puetz et al., 2018	596	5.3	101.62		1849.1	11.6	98.2586
ALC-5	ALC5-23.1	593.9	9.8	591.4	11.6	581.7	38.4	Talavera et al., 2015	Puetz et al., 2018	593.9	4.9	102.097		2613.7	17.6	99.0856
ALC-5	ALC5-24.1	579.3	9.8	593.2	12.8	646.9	45.6	Talavera et al., 2015	Puetz et al., 2018	579.3	4.9	89.5502		576.8	4.3	99.1236
ALC-5	ALC5-25.1	953.9	10.8	960.8	10.6	976.5	18.8	Talavera et al., 2015	Puetz et al., 2018	953.9	5.4	97.6856		2486.1	10.4	99.2639
ALC-5	ALC5-26.1	591.7	9.4	597.3	9.8	618.7	25.2	Talavera et al., 2015	Puetz et al., 2018	591.7	4.7	95.636		559.6	3.1	99.5198
ALC-5	ALC5-27.1	2467.8	37.6	2477.9	21.8	2486.1	20.8	Talavera et al., 2015	Puetz et al., 2018	2486.1	10.4	99.2639		1730.7	8	99.6764
ALC-5	ALC5-28.1	790	7.4	801.3	8.2	833.1	17.6	Talavera et al., 2015	Puetz et al., 2018	790	3.7	94.8266		1043.3	5.2	99.8466
ALC-5	ALC5-29.1	595.2	13.2	594.9	11.6	594.1	18.4	Talavera et al., 2015	Puetz et al., 2018	595.2	6.6	100.185		1867.5	6.8	99.9625
ALC-5	ALC5-30.1	564	15.2	558.1	16.6	534.1	55.2	Talavera et al., 2015	Puetz et al., 2018	564	7.6	105.598		595.2	6.6	100.185
ALC-5	ALC5-31.1	580.2	4.6	585.3	9	604.9	36.8	Talavera et al., 2015	Puetz et al., 2018	580.2	2.3	95.9167		2640.9	10	100.985
ALC-5	ALC5-32.1	582.6	8.8	577.7	8.6	558.3	19.2	Talavera et al., 2015	Puetz et al., 2018	582.6	4.4	104.352		596	5.3	101.62
ALC-5	ALC5-33.1	2589.8	78.4	2603.2	40.6	2613.7	35.2	Talavera et al., 2015	Puetz et al., 2018	2613.7	17.6	99.0856		593.9	4.9	102.097
ALC-5	ALC5-34.1	1041.7	8	1042.2	8	1043.3	10.4	Talavera et al., 2015	Puetz et al., 2018	1043.3	5.2	99.8466		582.6	4.4	104.352
ALC-5	ALC5-35.1	2321.1	25.6	2373.7	14.4	2419.3	8.4	Talavera et al., 2015	Puetz et al., 2018	2419.3	4.2	95.941		564	7.6	105.598
														OD3	Lower Cambrian
OD3	a1	2093.8	27.4	2171.1	20.5	2244.9	29.3	Fernández-Suarez et al., 2014	Stephan et al., 2018	2244.9	14.65	93.2692		555	5.3	89.7768
OD3	a10	616.1	11.4	626.3	21	663.4	86.9	Fernández-Suarez et al., 2014	Stephan et al., 2018	616.1	5.7	92.8701		598.5	4.05	90.8884
OD3	a11	762.6	14.6	748.9	24.7	708.1	89.5	Fernández-Suarez et al., 2014	Stephan et al., 2018	762.6	7.3	107.697		565.9	5.15	91.1419
OD3	a12	598.5	8.1	611.2	22.1	658.5	98.8	Fernández-Suarez et al., 2014	Stephan et al., 2018	598.5	4.05	90.8884		934.8	5.95	91.298
OD3	a13	1121.3	19.3	1112.6	19.5	1095.6	43.8	Fernández-Suarez et al., 2014	Stephan et al., 2018	1095.6	21.9	102.346		579.5	4.9	91.5626
OD3	a14	2259.2	30.4	2364.9	16.7	2457.4	14.8	Fernández-Suarez et al., 2014	Stephan et al., 2018	2457.4	7.4	91.9346		551.7	4.15	91.7055
OD3	a15	611.6	7.4	611.9	7.9	613.1	25	Fernández-Suarez et al., 2014	Stephan et al., 2018	611.6	3.7	99.7553		2457.4	7.4	91.9346
OD3	a16	654.6	18.7	663.4	31.5	693.4	121.9	Fernández-Suarez et al., 2014	Stephan et al., 2018	654.6	9.35	94.4044		2600.5	11.7	92.1131
OD3	a17	730.6	11.7	730.5	17.6	730.3	62	Fernández-Suarez et al., 2014	Stephan et al., 2018	730.6	5.85	100.041		574.6	5.7	92.1276
OD3	a18	2395.4	26.1	2508.1	17.8	2600.5	23.4	Fernández-Suarez et al., 2014	Stephan et al., 2018	2600.5	11.7	92.1131		578.3	3.75	92.3065
OD3	a19	934.8	11.9	961.8	14.8	1023.9	39.3	Fernández-Suarez et al., 2014	Stephan et al., 2018	934.8	5.95	91.298		966.8	9.55	92.499
OD3	a2	599.3	10.4	594.5	19.4	576.3	84.9	Fernández-Suarez et al., 2014	Stephan et al., 2018	599.3	5.2	103.991		627.8	5	92.8149
OD3	a20	662.9	11.4	654.5	17.4	625.4	67.1	Fernández-Suarez et al., 2014	Stephan et al., 2018	662.9	5.7	105.996		616.1	5.7	92.8701
OD3	a21	565.9	10.3	577	14	620.9	55.1	Fernández-Suarez et al., 2014	Stephan et al., 2018	565.9	5.15	91.1419		611	6.25	92.9136
OD3	a22	578.3	7.5	588.2	16.4	626.5	73.4	Fernández-Suarez et al., 2014	Stephan et al., 2018	578.3	3.75	92.3065		643.6	7.45	93.0327
OD3	a23	1176.1	21.3	1148	24.9	1095.2	60.7	Fernández-Suarez et al., 2014	Stephan et al., 2018	1095.2	30.35	107.387		2244.9	14.65	93.2692
OD3	a24	632.9	8.4	638.1	10.2	656.3	35.3	Fernández-Suarez et al., 2014	Stephan et al., 2018	632.9	4.2	96.4346		600.4	4.8	93.3458
OD3	a25	635	9.4	643.8	16	674.9	63.4	Fernández-Suarez et al., 2014	Stephan et al., 2018	635	4.7	94.088		613.1	4.45	93.4034
OD3	a26	802.7	25.5	788.5	33.6	748.7	108	Fernández-Suarez et al., 2014	Stephan et al., 2018	802.7	12.75	107.213		1912.9	11.7	93.5857
OD3	a27	780.7	9.5	786.2	24.5	801.7	89.6	Fernández-Suarez et al., 2014	Stephan et al., 2018	780.7	4.75	97.3806		588.9	4.15	93.6397
OD3	a28	555	10.6	567.6	20.8	618.2	93.7	Fernández-Suarez et al., 2014	Stephan et al., 2018	555	5.3	89.7768		696.9	12.7	93.7323
OD3	a29	573.4	17.4	578.3	30.5	597.6	133.1	Fernández-Suarez et al., 2014	Stephan et al., 2018	573.4	8.7	95.9505		641.2	3.95	93.8113
OD3	a3	619.4	7.1	627.4	14.4	656.6	60.6	Fernández-Suarez et al., 2014	Stephan et al., 2018	619.4	3.55	94.3345		591.9	4.85	93.8481
OD3	a30	1012.3	15.5	1020.2	14.6	1037.2	31.1	Fernández-Suarez et al., 2014	Stephan et al., 2018	1037.2	15.55	97.5993		618.3	4.85	93.9808
OD3	a31	660.5	15	669.6	30.4	700.4	121.6	Fernández-Suarez et al., 2014	Stephan et al., 2018	660.5	7.5	94.3033		635	4.7	94.088
OD3	a32	618.3	9.7	626.8	14.4	657.9	55.7	Fernández-Suarez et al., 2014	Stephan et al., 2018	618.3	4.85	93.9808		660.5	7.5	94.3033
OD3	a33	1304	18.9	1278.7	27.5	1236.5	67.3	Fernández-Suarez et al., 2014	Stephan et al., 2018	1236.5	33.65	105.459		619.4	3.55	94.3345
OD3	a34	836.2	10.5	820.8	11.6	779.3	33.2	Fernández-Suarez et al., 2014	Stephan et al., 2018	836.2	5.25	107.301		654.6	9.35	94.4044
OD3	a35	966.8	19.1	991.1	21.8	1045.2	54.6	Fernández-Suarez et al., 2014	Stephan et al., 2018	966.8	9.55	92.499		607.4	2.75	94.4928
OD3	a36	762.4	9.6	751.3	13.2	718.1	44.6	Fernández-Suarez et al., 2014	Stephan et al., 2018	762.4	4.8	106.169		633.2	6.55	94.6063
OD3	a37	1619.4	27.3	1618.2	20.4	1616.6	30.8	Fernández-Suarez et al., 2014	Stephan et al., 2018	1616.6	15.4	100.173		627.5	4.6	94.9319
OD3	a38	2362.4	35.9	2296.4	18.7	2238.3	16.8	Fernández-Suarez et al., 2014	Stephan et al., 2018	2238.3	8.4	105.544		628.4	5.3	94.9532
OD3	a39	641.2	7.9	650.6	10.6	683.5	38	Fernández-Suarez et al., 2014	Stephan et al., 2018	641.2	3.95	93.8113		610.6	4.9	94.9611
OD3	a4	763.5	13.2	749.4	23	707.2	83.8	Fernández-Suarez et al., 2014	Stephan et al., 2018	763.5	6.6	107.961		567.7	2.65	94.9967
OD3	a40	660.6	10.3	665.4	23.8	681.6	98	Fernández-Suarez et al., 2014	Stephan et al., 2018	660.6	5.15	96.919		613.6	6.85	95.0434
OD3	a41	649.4	9	643.5	18	623	75.3	Fernández-Suarez et al., 2014	Stephan et al., 2018	649.4	4.5	104.238		941.7	7.3	95.3234
OD3	a42	627.8	10	638.5	18.3	676.4	74.2	Fernández-Suarez et al., 2014	Stephan et al., 2018	627.8	5	92.8149		644.6	2.95	95.3268
OD3	a43	608.3	10.5	598.3	16.4	560.8	68.7	Fernández-Suarez et al., 2014	Stephan et al., 2018	608.3	5.25	108.47		740.5	7.9	95.5977
OD3	a44	1382.4	33	1368.5	32.8	1346.9	67	Fernández-Suarez et al., 2014	Stephan et al., 2018	1346.9	33.5	102.636		560.8	4.9	95.6344
OD3	a46	894.9	13.8	890.8	19	880.6	56.7	Fernández-Suarez et al., 2014	Stephan et al., 2018	894.9	6.9	101.624		588.3	1.8	95.7052
OD3	a48	647.8	10.6	645.4	18	637.1	72	Fernández-Suarez et al., 2014	Stephan et al., 2018	647.8	5.3	101.679		689.5	12.75	95.724
OD3	a49	740.5	15.8	749	18	774.6	53.2	Fernández-Suarez et al., 2014	Stephan et al., 2018	740.5	7.9	95.5977		648	5.45	95.7871
OD3	a5	1729.2	40.4	1742.2	25.9	1757.8	29.6	Fernández-Suarez et al., 2014	Stephan et al., 2018	1757.8	14.8	98.373		603.2	3.55	95.8525
OD3	a50	978.9	12.2	986.9	11.9	1005	27.1	Fernández-Suarez et al., 2014	Stephan et al., 2018	978.9	6.1	97.403		573.4	8.7	95.9505
OD3	a51	551.7	8.3	561.6	11.9	601.6	49.2	Fernández-Suarez et al., 2014	Stephan et al., 2018	551.7	4.15	91.7055		2193.5	16	96.1295
OD3	a52	2108.6	27.2	2151.9	21.3	2193.5	32	Fernández-Suarez et al., 2014	Stephan et al., 2018	2193.5	16	96.1295		612.3	6.95	96.1375
OD3	a53	629.1	9.3	628.4	16.5	626.2	68.1	Fernández-Suarez et al., 2014	Stephan et al., 2018	629.1	4.65	100.463		593.6	3.85	96.1919
OD3	a54	591.9	9.7	600	11.6	630.7	41.1	Fernández-Suarez et al., 2014	Stephan et al., 2018	591.9	4.85	93.8481		585.6	4.15	96.2366
OD3	a55	613.6	13.7	620.5	23.7	645.6	97.3	Fernández-Suarez et al., 2014	Stephan et al., 2018	613.6	6.85	95.0434		657.8	7.05	96.2399
OD3	a56	560.8	9.8	565.9	11.9	586.4	44.2	Fernández-Suarez et al., 2014	Stephan et al., 2018	560.8	4.9	95.6344		674.3	3.5	96.425
OD3	a57	648	10.9	654.4	24.8	676.5	103.1	Fernández-Suarez et al., 2014	Stephan et al., 2018	648	5.45	95.7871		632.9	4.2	96.4346
OD3	a58	611	12.5	621	17.7	657.6	67.3	Fernández-Suarez et al., 2014	Stephan et al., 2018	611	6.25	92.9136		613.3	4.85	96.6283
OD3	a59	552	6.5	555.5	12.1	569.8	55.7	Fernández-Suarez et al., 2014	Stephan et al., 2018	552	3.25	96.8761		596.4	4.55	96.7554
OD3	a6	624.6	9.8	624.2	28.7	622.8	127.8	Fernández-Suarez et al., 2014	Stephan et al., 2018	624.6	4.9	100.289		552	3.25	96.8761
OD3	a7	689.5	25.5	696.8	30.7	720.3	99.1	Fernández-Suarez et al., 2014	Stephan et al., 2018	689.5	12.75	95.724		660.6	5.15	96.919
OD3	a8	767.7	11.2	772.4	19.4	785.8	68.1	Fernández-Suarez et al., 2014	Stephan et al., 2018	767.7	5.6	97.6966		774.7	5.55	97.1411
OD3	a9	900.4	23.2	902.9	32.5	909.1	96.4	Fernández-Suarez et al., 2014	Stephan et al., 2018	900.4	11.6	99.043		708.1	9.8	97.3467
OD3	b1	709.8	11.4	699	17.9	664.4	66.6	Fernández-Suarez et al., 2014	Stephan et al., 2018	709.8	5.7	106.833		780.7	4.75	97.3806
OD3	b10	686.7	7.6	679.5	13.1	655.9	50.8	Fernández-Suarez et al., 2014	Stephan et al., 2018	686.7	3.8	104.696		978.9	6.1	97.403
OD3	b11	607.7	9.1	604.1	17.1	590.5	73.9	Fernández-Suarez et al., 2014	Stephan et al., 2018	607.7	4.55	102.913		1037.2	15.55	97.5993
OD3	b12	603.2	7.1	608.7	11	629.3	44.8	Fernández-Suarez et al., 2014	Stephan et al., 2018	603.2	3.55	95.8525		767.7	5.6	97.6966
OD3	b13	579.5	9.8	590.5	12	632.9	43.2	Fernández-Suarez et al., 2014	Stephan et al., 2018	579.5	4.9	91.5626		600.7	5.45	97.7543
OD3	b15	764.5	11.8	767	25.1	774.3	91.8	Fernández-Suarez et al., 2014	Stephan et al., 2018	764.5	5.9	98.7343		2134.1	14.35	97.8258
OD3	b16	674.3	7	680.1	10.5	699.3	38.8	Fernández-Suarez et al., 2014	Stephan et al., 2018	674.3	3.5	96.425		611.2	6.7	97.9173
OD3	b17	670.4	7.5	659.9	11.9	624.2	46.6	Fernández-Suarez et al., 2014	Stephan et al., 2018	670.4	3.75	107.401		595.2	3.85	98.153
OD3	b18	613.1	8.9	622.4	13.9	656.4	55.2	Fernández-Suarez et al., 2014	Stephan et al., 2018	613.1	4.45	93.4034		1757.8	14.8	98.373
OD3	b19	697.5	14.2	699.3	15.1	705	44.2	Fernández-Suarez et al., 2014	Stephan et al., 2018	697.5	7.1	98.9362		648	3.95	98.7203
OD3	b2	719.4	9	711.6	22.5	687.1	89.7	Fernández-Suarez et al., 2014	Stephan et al., 2018	719.4	4.5	104.701		764.5	5.9	98.7343
OD3	b20	627.5	9.2	634.8	19.8	661	83.9	Fernández-Suarez et al., 2014	Stephan et al., 2018	627.5	4.6	94.9319		840.9	9.3	98.7899
OD3	b21	644.6	5.9	651.6	18.3	676.2	78.9	Fernández-Suarez et al., 2014	Stephan et al., 2018	644.6	2.95	95.3268		1015.7	28.7	98.8776
OD3	b22	2443.9	31.7	2456.2	19.4	2466.4	23.6	Fernández-Suarez et al., 2014	Stephan et al., 2018	2466.4	11.8	99.0877		697.5	7.1	98.9362
OD3	b23	613.3	9.7	617.9	13.1	634.7	49.4	Fernández-Suarez et al., 2014	Stephan et al., 2018	613.3	4.85	96.6283		875.1	4.7	98.9484
OD3	b25	666.5	11.3	656	11.1	620.4	31.5	Fernández-Suarez et al., 2014	Stephan et al., 2018	666.5	5.65	107.431		900.4	11.6	99.043
OD3	b26	585.6	8.3	590.3	19.8	608.5	90.1	Fernández-Suarez et al., 2014	Stephan et al., 2018	585.6	4.15	96.2366		2466.4	11.8	99.0877
OD3	b27	588.3	3.6	593.7	13.8	614.7	64.9	Fernández-Suarez et al., 2014	Stephan et al., 2018	588.3	1.8	95.7052		2025.5	12.9	99.2594
OD3	b28	596.4	9.1	600.6	12.6	616.4	49.1	Fernández-Suarez et al., 2014	Stephan et al., 2018	596.4	4.55	96.7554		604.4	9.2	99.3425
OD3	b29	694	9.2	688	26.1	668.3	107.7	Fernández-Suarez et al., 2014	Stephan et al., 2018	694	4.6	103.846		574.1	4.1	99.4457
OD3	b3	607.4	5.5	614.9	17.3	642.8	78.1	Fernández-Suarez et al., 2014	Stephan et al., 2018	607.4	2.75	94.4928		611.6	3.7	99.7553
OD3	b30	942.9	21.8	929.1	32.1	896.5	96	Fernández-Suarez et al., 2014	Stephan et al., 2018	942.9	10.9	105.176		950.7	14.75	99.8005
OD3	b31	733.5	14.5	721.5	24.1	684.3	89	Fernández-Suarez et al., 2014	Stephan et al., 2018	733.5	7.25	107.19		1058.2	30.9	99.8771
OD3	b33	593	7.1	591.5	18	586.1	82.6	Fernández-Suarez et al., 2014	Stephan et al., 2018	593	3.55	101.177		564.2	4.45	99.9646
OD3	b34	639.8	7.9	631.6	12.9	602.6	52.3	Fernández-Suarez et al., 2014	Stephan et al., 2018	639.8	3.95	106.173		730.6	5.85	100.041
OD3	b35	1004.3	14.2	1007.9	20.6	1015.7	57.4	Fernández-Suarez et al., 2014	Stephan et al., 2018	1015.7	28.7	98.8776		1616.6	15.4	100.173
OD3	b36	689.6	12	679.8	17.3	647.5	64.1	Fernández-Suarez et al., 2014	Stephan et al., 2018	689.6	6	106.502		624.6	4.9	100.289
OD3	b37	626	9.7	621.5	11.9	605	42.9	Fernández-Suarez et al., 2014	Stephan et al., 2018	626	4.85	103.471		629.1	4.65	100.463
OD3	b38	875.1	9.4	877.7	15.2	884.4	48	Fernández-Suarez et al., 2014	Stephan et al., 2018	875.1	4.7	98.9484		631.3	5.75	101.089
OD3	b39	950.7	29.5	951.3	28.4	952.6	64.7	Fernández-Suarez et al., 2014	Stephan et al., 2018	950.7	14.75	99.8005		593	3.55	101.177
OD3	b4	1078.7	10.5	1069.5	52.8	1050.8	159.6	Fernández-Suarez et al., 2014	Stephan et al., 2018	1050.8	79.8	102.655		1967.2	15	101.261
OD3	b40	604.4	18.4	605.2	24.7	608.4	94.8	Fernández-Suarez et al., 2014	Stephan et al., 2018	604.4	9.2	99.3425		661.4	6.3	101.411
OD3	b41	665.5	13.2	662.8	13.6	653.6	39.9	Fernández-Suarez et al., 2014	Stephan et al., 2018	665.5	6.6	101.821		894.9	6.9	101.624
OD3	b43	708.1	19.6	712.7	21.1	727.4	61.3	Fernández-Suarez et al., 2014	Stephan et al., 2018	708.1	9.8	97.3467		647.8	5.3	101.679
OD3	b44	567.7	5.3	573.7	16	597.6	76.1	Fernández-Suarez et al., 2014	Stephan et al., 2018	567.7	2.65	94.9967		548.2	4.05	101.707
OD3	b45	643.6	14.9	654.4	27.6	691.8	110.7	Fernández-Suarez et al., 2014	Stephan et al., 2018	643.6	7.45	93.0327		665.5	6.6	101.821
OD3	b46	657.8	14.1	663.6	19.1	683.5	68.8	Fernández-Suarez et al., 2014	Stephan et al., 2018	657.8	7.05	96.2399		664.9	5.75	102.324
OD3	b47	1992	45.8	1979.8	27.5	1967.2	30	Fernández-Suarez et al., 2014	Stephan et al., 2018	1967.2	15	101.261		1095.6	21.9	102.346
OD3	b48	661.4	12.6	659.3	40.4	652.2	173.8	Fernández-Suarez et al., 2014	Stephan et al., 2018	661.4	6.3	101.411		601.9	5.55	102.364
OD3	b5	1790.2	16.6	1847.6	14.3	1912.9	23.4	Fernández-Suarez et al., 2014	Stephan et al., 2018	1912.9	11.7	93.5857		605.8	3.85	102.435
OD3	b52	696.9	25.4	708	43.4	743.5	160.7	Fernández-Suarez et al., 2014	Stephan et al., 2018	696.9	12.7	93.7323		1346.9	33.5	102.636
OD3	b53	610.6	9.8	617.5	16.2	643	65.9	Fernández-Suarez et al., 2014	Stephan et al., 2018	610.6	4.9	94.9611		1050.8	79.8	102.655
OD3	b54	548.2	8.1	546.4	11.7	539	50.1	Fernández-Suarez et al., 2014	Stephan et al., 2018	548.2	4.05	101.707		600.4	2.65	102.808
OD3	b55	2010.5	26	2017.9	18.4	2025.5	25.8	Fernández-Suarez et al., 2014	Stephan et al., 2018	2025.5	12.9	99.2594		607.7	4.55	102.913
OD3	b57	3258.5	57.6	3200.2	23.7	3163.8	14.7	Fernández-Suarez et al., 2014	Stephan et al., 2018	3163.8	7.35	102.993		3163.8	7.35	102.993
OD3	b58	633.2	13.1	641.2	49.7	669.3	218.7	Fernández-Suarez et al., 2014	Stephan et al., 2018	633.2	6.55	94.6063		636.6	7	103.428
OD3	b59	664.9	11.5	661.5	24.8	649.8	102.1	Fernández-Suarez et al., 2014	Stephan et al., 2018	664.9	5.75	102.324		626	4.85	103.471
OD3	b6	631.3	11.5	629.8	13.4	624.5	45.6	Fernández-Suarez et al., 2014	Stephan et al., 2018	631.3	5.75	101.089		694	4.6	103.846
OD3	b7	601.9	11.1	599	15.5	588	61.4	Fernández-Suarez et al., 2014	Stephan et al., 2018	601.9	5.55	102.364		599.3	5.2	103.991
OD3	b8	600.4	5.3	597	7.1	584	27.4	Fernández-Suarez et al., 2014	Stephan et al., 2018	600.4	2.65	102.808		649.4	4.5	104.238
OD3	b9	564.2	8.9	564.2	25.9	564.4	125.4	Fernández-Suarez et al., 2014	Stephan et al., 2018	564.2	4.45	99.9646		627.1	3.45	104.552
OD3	c1	574.1	8.2	574.8	10.8	577.3	42.7	Fernández-Suarez et al., 2014	Stephan et al., 2018	574.1	4.1	99.4457		650.4	5.2	104.65
OD3	c10	824	11.7	809.7	15.4	770.5	48.5	Fernández-Suarez et al., 2014	Stephan et al., 2018	824	5.85	106.944		2022.2	14.85	104.668
OD3	c11	706.3	6.9	696.2	14.2	663.5	56	Fernández-Suarez et al., 2014	Stephan et al., 2018	706.3	3.45	106.451		686.7	3.8	104.696
OD3	c12	600.7	10.9	603.6	13.2	614.5	47.6	Fernández-Suarez et al., 2014	Stephan et al., 2018	600.7	5.45	97.7543		719.4	4.5	104.701
OD3	c13	612.3	13.9	617.6	27.5	636.9	117.4	Fernández-Suarez et al., 2014	Stephan et al., 2018	612.3	6.95	96.1375		682.1	4.45	105.084
OD3	c14	2564.6	32.1	2472	20.4	2396.7	27	Fernández-Suarez et al., 2014	Stephan et al., 2018	2396.7	13.5	107.005		942.9	10.9	105.176
OD3	c15	636.6	14	632	14.1	615.5	41	Fernández-Suarez et al., 2014	Stephan et al., 2018	636.6	7	103.428		643	3.5	105.289
OD3	c16	2116.6	35.4	2069.1	22.8	2022.2	29.7	Fernández-Suarez et al., 2014	Stephan et al., 2018	2022.2	14.85	104.668		1236.5	33.65	105.459
OD3	c17	1056.9	20.6	1057.3	24.5	1058.2	61.8	Fernández-Suarez et al., 2014	Stephan et al., 2018	1058.2	30.9	99.8771		2238.3	8.4	105.544
OD3	c18	616.5	10.2	609.1	21.8	581.6	96.4	Fernández-Suarez et al., 2014	Stephan et al., 2018	616.5	5.1	106.001		978.7	10.1	105.748
OD3	c2	723.9	9.1	709.7	11.7	665.1	39.9	Fernández-Suarez et al., 2014	Stephan et al., 2018	723.9	4.55	108.841		662.9	5.7	105.996
OD3	c20	978.7	20.2	962.4	24.3	925.5	66	Fernández-Suarez et al., 2014	Stephan et al., 2018	978.7	10.1	105.748		616.5	5.1	106.001
OD3	c21	588.9	8.3	597.2	9	628.9	28.7	Fernández-Suarez et al., 2014	Stephan et al., 2018	588.9	4.15	93.6397		675.2	4.1	106.164
OD3	c22	650.4	10.4	643.9	17.8	621.5	72.2	Fernández-Suarez et al., 2014	Stephan et al., 2018	650.4	5.2	104.65		762.4	4.8	106.169
OD3	c23	600.4	9.6	609.4	12.6	643.2	46.7	Fernández-Suarez et al., 2014	Stephan et al., 2018	600.4	4.8	93.3458		639.8	3.95	106.173
OD3	c24	840.9	18.6	843.8	47.4	851.2	164.9	Fernández-Suarez et al., 2014	Stephan et al., 2018	840.9	9.3	98.7899		646.6	3	106.349
OD3	c25	592.5	8.2	585.2	13	556.8	55.4	Fernández-Suarez et al., 2014	Stephan et al., 2018	592.5	4.1	106.412		592.5	4.1	106.412
OD3	c26	977.9	28	958	30.8	912.4	80	Fernández-Suarez et al., 2014	Stephan et al., 2018	977.9	14	107.179		706.3	3.45	106.451
OD3	c27	646.6	6	638.1	11	608	45.6	Fernández-Suarez et al., 2014	Stephan et al., 2018	646.6	3	106.349		689.6	6	106.502
OD3	c28	774.7	11.1	780.6	25.6	797.5	93.3	Fernández-Suarez et al., 2014	Stephan et al., 2018	774.7	5.55	97.1411		709.8	5.7	106.833
OD3	c29	595.2	7.7	597.5	11.1	606.4	44.6	Fernández-Suarez et al., 2014	Stephan et al., 2018	595.2	3.85	98.153		824	5.85	106.944
OD3	c3	2879.5	34.3	2755.2	18.4	2665.4	20.9	Fernández-Suarez et al., 2014	Stephan et al., 2018	2665.4	10.45	108.033		2396.7	13.5	107.005
OD3	c30	605.8	7.7	602.8	16.9	591.4	75.5	Fernández-Suarez et al., 2014	Stephan et al., 2018	605.8	3.85	102.435		977.9	14	107.179
OD3	c31	643	7	635.8	11.6	610.7	47	Fernández-Suarez et al., 2014	Stephan et al., 2018	643	3.5	105.289		733.5	7.25	107.19
OD3	c32	2087.7	20.3	2111.1	17.7	2134.1	28.7	Fernández-Suarez et al., 2014	Stephan et al., 2018	2134.1	14.35	97.8258		802.7	12.75	107.213
OD3	c33	574.6	11.4	584.6	22.1	623.7	97.2	Fernández-Suarez et al., 2014	Stephan et al., 2018	574.6	5.7	92.1276		836.2	5.25	107.301
OD3	c34	628.4	10.6	635.7	27.4	661.8	118.5	Fernández-Suarez et al., 2014	Stephan et al., 2018	628.4	5.3	94.9532		1095.2	30.35	107.387
OD3	c37	593.6	7.7	598.5	15.4	617.1	67.6	Fernández-Suarez et al., 2014	Stephan et al., 2018	593.6	3.85	96.1919		670.4	3.75	107.401
OD3	c38	941.7	14.6	955.6	16.3	987.9	41.4	Fernández-Suarez et al., 2014	Stephan et al., 2018	941.7	7.3	95.3234		666.5	5.65	107.431
OD3	c39	682.1	8.9	674.5	13.1	649.1	48.7	Fernández-Suarez et al., 2014	Stephan et al., 2018	682.1	4.45	105.084		762.6	7.3	107.697
OD3	c4	648	7.9	649.9	17.5	656.4	73.5	Fernández-Suarez et al., 2014	Stephan et al., 2018	648	3.95	98.7203		763.5	6.6	107.961
OD3	c7	611.2	13.4	614	21.5	624.2	87.7	Fernández-Suarez et al., 2014	Stephan et al., 2018	611.2	6.7	97.9173		2665.4	10.45	108.033
OD3	c8	627.1	6.9	621.2	9.5	599.8	36.9	Fernández-Suarez et al., 2014	Stephan et al., 2018	627.1	3.45	104.552		608.3	5.25	108.47
OD3	c9	675.2	8.2	666.2	12.1	636	45.6	Fernández-Suarez et al., 2014	Stephan et al., 2018	675.2	4.1	106.164		723.9	4.55	108.841
														OD4	Ediacaran
OD4	a1	1005.8	35.2	1005.8	34.7	1005.6	79.2	Fernández-Suarez et al., 2014	Stephan et al., 2018	1005.6	39.6	100.02		2716.7	7.35	89.5977
OD4	a11	2687.3	87.7	2664.6	43.5	2647.4	38.5	Fernández-Suarez et al., 2014	Stephan et al., 2018	2647.4	19.25	101.507		2516.9	7.25	90.0234
OD4	a12	574	20.9	584.4	22.2	625.4	70.3	Fernández-Suarez et al., 2014	Stephan et al., 2018	574	10.45	91.7813		961.2	17.75	90.135
OD4	a13	579.2	20.9	583.6	19.3	600.9	46.4	Fernández-Suarez et al., 2014	Stephan et al., 2018	579.2	10.45	96.3888		926.9	17.05	90.2092
OD4	a14	573.3	21.5	574.2	48.1	578	222.5	Fernández-Suarez et al., 2014	Stephan et al., 2018	573.3	10.75	99.1869		594.4	4.45	90.2247
OD4	a15	759.8	27.4	778	24.3	830.4	48.2	Fernández-Suarez et al., 2014	Stephan et al., 2018	759.8	13.7	91.4981		897.9	15.45	90.642
OD4	a17	641.5	23.5	647.3	22.6	667.8	58.4	Fernández-Suarez et al., 2014	Stephan et al., 2018	641.5	11.75	96.0617		777.9	4.9	90.6643
OD4	a18	594.4	22	605.5	19.6	647.2	40.2	Fernández-Suarez et al., 2014	Stephan et al., 2018	594.4	11	91.8418		976.9	17.35	90.7141
OD4	a19	2265.8	72.6	2400.5	35.8	2516.9	14.5	Fernández-Suarez et al., 2014	Stephan et al., 2018	2516.9	7.25	90.0234		774.5	5.7	90.7227
OD4	a2	918.5	31.8	942.6	27.7	999.3	51.9	Fernández-Suarez et al., 2014	Stephan et al., 2018	918.5	15.9	91.9143		594.2	10.7	90.7453
OD4	a21	776.4	29.4	796.1	113.3	851.9	418.4	Fernández-Suarez et al., 2014	Stephan et al., 2018	776.4	14.7	91.1375		796.5	6.4	90.9247
OD4	a22	538.3	20.8	548.5	23	591.2	78.5	Fernández-Suarez et al., 2014	Stephan et al., 2018	538.3	10.4	91.0521		608.7	3.05	90.9322
OD4	a24	580.4	21	591	19.8	632.2	49.3	Fernández-Suarez et al., 2014	Stephan et al., 2018	580.4	10.5	91.8064		538.3	10.4	91.0521
OD4	a27	1858.1	62.2	1903.4	34.8	1953.2	22.3	Fernández-Suarez et al., 2014	Stephan et al., 2018	1953.2	11.15	95.1311		850.7	15.85	91.0619
OD4	a28	3193.6	98.8	3349.6	38.9	3444.4	10.6	Fernández-Suarez et al., 2014	Stephan et al., 2018	3444.4	5.3	92.7186		676.4	4.55	91.0854
OD4	a29	2482.9	78	2617.8	36.9	2723.9	17.7	Fernández-Suarez et al., 2014	Stephan et al., 2018	2723.9	8.85	91.1524		568.1	3.75	91.1001
OD4	a3	564.6	20.2	570	18.5	591.9	43.1	Fernández-Suarez et al., 2014	Stephan et al., 2018	564.6	10.1	95.3877		776.4	14.7	91.1375
OD4	a30	736.6	27	749.7	22.2	789	33.3	Fernández-Suarez et al., 2014	Stephan et al., 2018	736.6	13.5	93.3587		2723.9	8.85	91.1524
OD4	a31	555.3	19.7	563.9	17.4	598.8	34	Fernández-Suarez et al., 2014	Stephan et al., 2018	555.3	9.85	92.7355		631.9	5.25	91.1964
OD4	a33	2434.1	75.9	2591.3	36	2716.7	14.7	Fernández-Suarez et al., 2014	Stephan et al., 2018	2716.7	7.35	89.5977		575.2	3.85	91.3741
OD4	a34	2056.3	66.3	2119.4	34.7	2181.1	17.9	Fernández-Suarez et al., 2014	Stephan et al., 2018	2181.1	8.95	94.2781		576.5	5.75	91.3919
OD4	a35	602.9	22.3	592.1	19.8	550.8	46	Fernández-Suarez et al., 2014	Stephan et al., 2018	602.9	11.15	109.459		630.3	3.8	91.4141
OD4	a36	639	23.9	651.2	22.9	693.7	57.2	Fernández-Suarez et al., 2014	Stephan et al., 2018	639	11.95	92.1147		759.8	13.7	91.4981
OD4	a38	587.2	22.1	596.5	21.4	632.3	57	Fernández-Suarez et al., 2014	Stephan et al., 2018	587.2	11.05	92.8673		596.1	5.65	91.5668
OD4	a39	656	23.8	655.1	19.8	651.9	32.5	Fernández-Suarez et al., 2014	Stephan et al., 2018	656	11.9	100.629		562.2	4.05	91.5784
OD4	a40	594.2	21.4	606.9	18.9	654.8	36.3	Fernández-Suarez et al., 2014	Stephan et al., 2018	594.2	10.7	90.7453		574	10.45	91.7813
OD4	a41	667.1	25.9	665.7	27.8	660.8	85	Fernández-Suarez et al., 2014	Stephan et al., 2018	667.1	12.95	100.953		580.4	10.5	91.8064
OD4	a42	590.4	21.2	597.6	21.1	625	59.7	Fernández-Suarez et al., 2014	Stephan et al., 2018	590.4	10.6	94.464		594.4	11	91.8418
OD4	a43	713.3	25.6	724.7	21.6	760.2	36.8	Fernández-Suarez et al., 2014	Stephan et al., 2018	713.3	12.8	93.8306		683.5	12.95	91.8559
OD4	a44	866.5	31.9	875.2	30.9	897.3	72.6	Fernández-Suarez et al., 2014	Stephan et al., 2018	866.5	15.95	96.5675		918.5	15.9	91.9143
OD4	a45	2087.9	67.5	2143.8	36.2	2197.8	25	Fernández-Suarez et al., 2014	Stephan et al., 2018	2197.8	12.5	94.9995		662.4	3.3	92
OD4	a47	963.6	35.3	978.9	30.5	1013.3	57.4	Fernández-Suarez et al., 2014	Stephan et al., 2018	963.6	17.65	95.0952		589.1	3.15	92.1044
OD4	a48	683.5	25.9	697.8	25.2	744.1	63.5	Fernández-Suarez et al., 2014	Stephan et al., 2018	683.5	12.95	91.8559		639	11.95	92.1147
OD4	a49	594.9	22.4	603.6	19.3	636.2	34.3	Fernández-Suarez et al., 2014	Stephan et al., 2018	594.9	11.2	93.5083		572.6	4.2	92.1171
OD4	a5	591	22	593.2	26.5	601.5	96	Fernández-Suarez et al., 2014	Stephan et al., 2018	591	11	98.2544		663.3	3.6	92.1506
OD4	a52	657.1	24.1	666.5	38.7	698.1	147.2	Fernández-Suarez et al., 2014	Stephan et al., 2018	657.1	12.05	94.1269		562.2	3.6	92.1942
OD4	a53	2728.6	84.9	2852	37.6	2940.4	15.7	Fernández-Suarez et al., 2014	Stephan et al., 2018	2940.4	7.85	92.7969		647.5	3.8	92.1971
OD4	a54	697.6	25.3	697.1	21.7	695.5	41.8	Fernández-Suarez et al., 2014	Stephan et al., 2018	697.6	12.65	100.302		605.1	3.05	92.269
OD4	a55	623.1	22.3	632.1	19.1	664.6	33.7	Fernández-Suarez et al., 2014	Stephan et al., 2018	623.1	11.15	93.7556		596.2	3.55	92.291
OD4	a56	606.4	22.8	614.6	20.5	644.8	44.5	Fernández-Suarez et al., 2014	Stephan et al., 2018	606.4	11.4	94.0447		639	5.1	92.4881
OD4	a57	887	32.9	904.2	32.9	946.4	77.6	Fernández-Suarez et al., 2014	Stephan et al., 2018	887	16.45	93.7236		611.7	7.35	92.5136
OD4	a58	1084.4	39.1	1108.3	41.2	1155.5	93	Fernández-Suarez et al., 2014	Stephan et al., 2018	1155.5	46.5	93.8468		676.3	4.45	92.5678
OD4	a59	926.9	34.1	957.2	27.7	1027.5	42.8	Fernández-Suarez et al., 2014	Stephan et al., 2018	926.9	17.05	90.2092		650.7	3.6	92.6132
OD4	a6	2682.1	82.6	2764.9	36.7	2825.9	14.5	Fernández-Suarez et al., 2014	Stephan et al., 2018	2825.9	7.25	94.9114		3444.4	5.3	92.7186
OD4	a60	850.7	31.7	874.2	33.1	934.2	82.5	Fernández-Suarez et al., 2014	Stephan et al., 2018	850.7	15.85	91.0619		555.3	9.85	92.7355
OD4	a7	961.2	35.5	993.8	28.6	1066.4	42.8	Fernández-Suarez et al., 2014	Stephan et al., 2018	961.2	17.75	90.135		2940.4	7.85	92.7969
OD4	a9	976.9	34.7	1008.2	33.1	1076.9	70.1	Fernández-Suarez et al., 2014	Stephan et al., 2018	976.9	17.35	90.7141		619.1	3.2	92.8325
OD4	b1	545.5	9.2	551.1	12.2	574.3	49.1	Fernández-Suarez et al., 2014	Stephan et al., 2018	545.5	4.6	94.9852		587.2	11.05	92.8673
OD4	b10	603.3	8.5	601.2	14.6	593.3	62.3	Fernández-Suarez et al., 2014	Stephan et al., 2018	603.3	4.25	101.685		1075.7	19.25	92.9999
OD4	b11	611.7	14.7	622.3	18.2	661.2	63.8	Fernández-Suarez et al., 2014	Stephan et al., 2018	611.7	7.35	92.5136		736.6	13.5	93.3587
OD4	b13	612.4	9.2	605.3	15	579.1	62.5	Fernández-Suarez et al., 2014	Stephan et al., 2018	612.4	4.6	105.75		1077.5	22.55	93.5035
OD4	b16	616.5	10.7	615.3	17.4	611.2	71.3	Fernández-Suarez et al., 2014	Stephan et al., 2018	616.5	5.35	100.867		594.9	11.2	93.5083
OD4	b18	553.3	9	553	14.8	552.1	65.9	Fernández-Suarez et al., 2014	Stephan et al., 2018	553.3	4.5	100.217		895	4.95	93.7173
OD4	b19	1052.6	30	1025.3	43.9	967.5	123.8	Fernández-Suarez et al., 2014	Stephan et al., 2018	967.5	61.9	108.796		647.5	4.35	93.7183
OD4	b2	849.6	14.6	855.5	24.9	870.7	80.8	Fernández-Suarez et al., 2014	Stephan et al., 2018	849.6	7.3	97.5767		887	16.45	93.7236
OD4	b21	2011.1	20.7	1994.3	14.3	1976.9	19.8	Fernández-Suarez et al., 2014	Stephan et al., 2018	1976.9	9.9	101.73		623.1	11.15	93.7556
OD4	b22	630.3	7.6	643.4	17.1	689.5	71.6	Fernández-Suarez et al., 2014	Stephan et al., 2018	630.3	3.8	91.4141		824.6	4.4	93.7898
OD4	b23	670.5	12.8	663.6	29.6	640.2	123.1	Fernández-Suarez et al., 2014	Stephan et al., 2018	670.5	6.4	104.733		713.3	12.8	93.8306
OD4	b24	642.1	7.3	642.1	8.9	642.1	31.3	Fernández-Suarez et al., 2014	Stephan et al., 2018	642.1	3.65	100		1155.5	46.5	93.8468
OD4	b25	647.5	7.6	659.9	14.9	702.3	59.7	Fernández-Suarez et al., 2014	Stephan et al., 2018	647.5	3.8	92.1971		2506.3	9.4	93.8595
OD4	b27	662.4	6.6	675.7	12.4	720	48.3	Fernández-Suarez et al., 2014	Stephan et al., 2018	662.4	3.3	92		606.4	11.4	94.0447
OD4	b28	568.1	7.5	579.3	11.6	623.6	48	Fernández-Suarez et al., 2014	Stephan et al., 2018	568.1	3.75	91.1001		629.7	3.65	94.0974
OD4	b29	669.1	8.2	678.3	14.3	709.1	55.2	Fernández-Suarez et al., 2014	Stephan et al., 2018	669.1	4.1	94.359		657.1	12.05	94.1269
OD4	b3	676.4	9.1	691.9	18.1	742.6	70.2	Fernández-Suarez et al., 2014	Stephan et al., 2018	676.4	4.55	91.0854		584.4	2.35	94.1366
OD4	b31	617.5	7.2	612.1	15.9	592	70	Fernández-Suarez et al., 2014	Stephan et al., 2018	617.5	3.6	104.307		2181.1	8.95	94.2781
OD4	b32	672.7	7.3	679.7	10.2	703	36.5	Fernández-Suarez et al., 2014	Stephan et al., 2018	672.7	3.65	95.6899		669.1	4.1	94.359
OD4	b33	584.4	4.7	591.9	19	620.8	89.6	Fernández-Suarez et al., 2014	Stephan et al., 2018	584.4	2.35	94.1366		956.8	7.85	94.3869
OD4	b34	584.6	7.5	580.1	10.9	562.4	45.3	Fernández-Suarez et al., 2014	Stephan et al., 2018	584.6	3.75	103.947		2336.2	12.7	94.3926
OD4	b35	596.2	7.1	606.7	15.8	646	69.3	Fernández-Suarez et al., 2014	Stephan et al., 2018	596.2	3.55	92.291		642.5	4.05	94.402
OD4	b36	574	4.7	567	19	538.9	93.8	Fernández-Suarez et al., 2014	Stephan et al., 2018	574	2.35	106.513		815.2	9.25	94.4393
OD4	b37	1953.1	29.1	1956.5	21	1960.1	30.2	Fernández-Suarez et al., 2014	Stephan et al., 2018	1960.1	15.1	99.6429		590.4	10.6	94.464
OD4	b38	642.5	8.1	651	10	680.6	34.3	Fernández-Suarez et al., 2014	Stephan et al., 2018	642.5	4.05	94.402		888	4.75	94.5989
OD4	b39	777.9	9.8	799	14.2	858	45.4	Fernández-Suarez et al., 2014	Stephan et al., 2018	777.9	4.9	90.6643		717.1	5.9	94.6042
OD4	b4	594.4	8.9	607.9	13.8	658.8	55.4	Fernández-Suarez et al., 2014	Stephan et al., 2018	594.4	4.45	90.2247		613.2	2.9	94.7173
OD4	b40	562.2	7.2	571.8	17.2	609.8	79.9	Fernández-Suarez et al., 2014	Stephan et al., 2018	562.2	3.6	92.1942		592.5	4.6	94.8911
OD4	b41	618.9	7.6	622.3	17.7	634.7	77.2	Fernández-Suarez et al., 2014	Stephan et al., 2018	618.9	3.8	97.5106		838.1	4.55	94.8936
OD4	b42	708.5	7.3	694	13.6	647.2	53.1	Fernández-Suarez et al., 2014	Stephan et al., 2018	708.5	3.65	109.472		2825.9	7.25	94.9114
OD4	b43	672.3	13.2	659.1	27.7	614.3	114.9	Fernández-Suarez et al., 2014	Stephan et al., 2018	672.3	6.6	109.442		656	3.7	94.9211
OD4	b44	664.9	8.6	653.3	16.6	613.7	68.2	Fernández-Suarez et al., 2014	Stephan et al., 2018	664.9	4.3	108.343		545.5	4.6	94.9852
OD4	b45	922.2	13	925.4	25	933.1	78.4	Fernández-Suarez et al., 2014	Stephan et al., 2018	922.2	6.5	98.8319		2197.8	12.5	94.9995
OD4	b46	681.3	7.7	669.7	13.4	630.9	53	Fernández-Suarez et al., 2014	Stephan et al., 2018	681.3	3.85	107.989		603.3	3.5	95.0228
OD4	b47	647.5	8.7	657.2	11.9	690.9	42.9	Fernández-Suarez et al., 2014	Stephan et al., 2018	647.5	4.35	93.7183		867.5	6.55	95.0789
OD4	b48	2050.5	30.5	2032.4	20.8	2014	28.5	Fernández-Suarez et al., 2014	Stephan et al., 2018	2014	14.25	101.812		963.6	17.65	95.0952
OD4	b49	609.8	11	601.3	17.3	569.6	72.4	Fernández-Suarez et al., 2014	Stephan et al., 2018	609.8	5.5	107.058		1953.2	11.15	95.1311
OD4	b5	956.8	15.7	974.2	24.3	1013.7	69.8	Fernández-Suarez et al., 2014	Stephan et al., 2018	956.8	7.85	94.3869		660.5	3.1	95.2553
OD4	b50	639	10.2	650.6	14.1	690.9	51.6	Fernández-Suarez et al., 2014	Stephan et al., 2018	639	5.1	92.4881		564.6	10.1	95.3877
OD4	b54	798.8	20.4	784.1	23.7	742.5	71.8	Fernández-Suarez et al., 2014	Stephan et al., 2018	798.8	10.2	107.582		617.5	5.8	95.6326
OD4	b55	676.5	8.9	665.5	19	628.7	78.4	Fernández-Suarez et al., 2014	Stephan et al., 2018	676.5	4.45	107.603		672.7	3.65	95.6899
OD4	b56	636	8.5	632.1	12.6	617.9	49.4	Fernández-Suarez et al., 2014	Stephan et al., 2018	636	4.25	102.929		649.7	4.35	95.8542
OD4	b57	2638.7	29.4	2615.4	19.5	2597.4	26.3	Fernández-Suarez et al., 2014	Stephan et al., 2018	2597.4	13.15	101.59		588.4	2.9	95.94
OD4	b58	897.9	30.9	925.2	34.4	990.6	87.3	Fernández-Suarez et al., 2014	Stephan et al., 2018	897.9	15.45	90.642		661.2	4.3	95.9652
OD4	b59	631.9	10.5	645.4	22.1	692.9	91.1	Fernández-Suarez et al., 2014	Stephan et al., 2018	631.9	5.25	91.1964		655.6	6.5	96.0586
OD4	b6	575.2	7.7	586.3	14.5	629.5	63.4	Fernández-Suarez et al., 2014	Stephan et al., 2018	575.2	3.85	91.3741		641.5	11.75	96.0617
OD4	b60	617.5	11.6	623.6	17.4	645.7	68.2	Fernández-Suarez et al., 2014	Stephan et al., 2018	617.5	5.8	95.6326		687.1	4.15	96.2325
OD4	b7	774.5	11.4	795.2	19.3	853.7	65.2	Fernández-Suarez et al., 2014	Stephan et al., 2018	774.5	5.7	90.7227		804.7	7.15	96.2445
OD4	c1	867.5	13.1	880.2	15.1	912.4	40.9	Fernández-Suarez et al., 2014	Stephan et al., 2018	867.5	6.55	95.0789		616.6	4	96.3588
OD4	c12	683	5.5	688.8	15.1	708	61.6	Fernández-Suarez et al., 2014	Stephan et al., 2018	683	2.75	96.4689		579.2	10.45	96.3888
OD4	c13	1053.4	10.3	1037.1	25.6	1002.7	77.1	Fernández-Suarez et al., 2014	Stephan et al., 2018	1002.7	38.55	105.056		683	2.75	96.4689
OD4	c14	655.6	13	661.7	16.8	682.5	58.8	Fernández-Suarez et al., 2014	Stephan et al., 2018	655.6	6.5	96.0586		2044.2	10.2	96.5463
OD4	c15	936.7	11.5	934.5	18	929.3	54	Fernández-Suarez et al., 2014	Stephan et al., 2018	936.7	5.75	100.796		866.5	15.95	96.5675
OD4	c16	603.3	7	609.9	13.2	634.9	56.3	Fernández-Suarez et al., 2014	Stephan et al., 2018	603.3	3.5	95.0228		3237.7	8.2	96.5994
OD4	c17	662.2	8.1	653.5	15.3	623.4	62.6	Fernández-Suarez et al., 2014	Stephan et al., 2018	662.2	4.05	106.224		2417.4	10.85	96.8023
OD4	c18	839.5	12.2	832.8	20.4	815	67.9	Fernández-Suarez et al., 2014	Stephan et al., 2018	839.5	6.1	103.006		2036	7.15	96.8271
OD4	c19	674.6	8.6	669.5	15.8	652.2	62.7	Fernández-Suarez et al., 2014	Stephan et al., 2018	674.6	4.3	103.435		2452.7	13.2	96.9911
OD4	c2	2352.4	30.5	2435.8	17.6	2506.3	18.8	Fernández-Suarez et al., 2014	Stephan et al., 2018	2506.3	9.4	93.8595		2435.9	8.3	97.0032
OD4	c20	1096.1	29	1084.1	36.9	1060	95.2	Fernández-Suarez et al., 2014	Stephan et al., 2018	1060	47.6	103.406		1963.6	10.75	97.4282
OD4	c21	660.5	6.2	668	14	693.4	57.4	Fernández-Suarez et al., 2014	Stephan et al., 2018	660.5	3.1	95.2553		619.7	4.9	97.4984
OD4	c22	613.2	5.8	620.6	17.6	647.4	78.6	Fernández-Suarez et al., 2014	Stephan et al., 2018	613.2	2.9	94.7173		618.9	3.8	97.5106
OD4	c23	804.7	14.3	813.1	25.2	836.1	85.3	Fernández-Suarez et al., 2014	Stephan et al., 2018	804.7	7.15	96.2445		648.8	2.95	97.5492
OD4	c24	935.5	10.7	932.9	10.7	926.6	25.7	Fernández-Suarez et al., 2014	Stephan et al., 2018	935.5	5.35	100.961		849.6	7.3	97.5767
OD4	c25	663.3	7.2	676.3	14.5	719.8	57.3	Fernández-Suarez et al., 2014	Stephan et al., 2018	663.3	3.6	92.1506		681.6	4.1	97.6504
OD4	c26	676.3	8.9	688.9	14.6	730.6	54.3	Fernández-Suarez et al., 2014	Stephan et al., 2018	676.3	4.45	92.5678		566.5	3.3	98.2143
OD4	c27	658.2	7.6	656.2	10.8	649.5	40.3	Fernández-Suarez et al., 2014	Stephan et al., 2018	658.2	3.8	101.339		591	11	98.2544
OD4	c28	2378.9	19.7	2418.9	17	2452.7	26.4	Fernández-Suarez et al., 2014	Stephan et al., 2018	2452.7	13.2	96.9911		922.2	6.5	98.8319
OD4	c29	620.8	9.3	610.4	10.6	572.1	37.1	Fernández-Suarez et al., 2014	Stephan et al., 2018	620.8	4.65	108.512		686.8	4.45	98.8913
OD4	c3	971.8	10.4	965.3	16.4	950.6	48.5	Fernández-Suarez et al., 2014	Stephan et al., 2018	971.8	5.2	102.23		573.3	10.75	99.1869
OD4	c30	703	9.6	692.7	13.2	659.4	47	Fernández-Suarez et al., 2014	Stephan et al., 2018	703	4.8	106.612		959.8	6.3	99.276
OD4	c32	1973.6	21.2	2008.3	14.9	2044.2	20.4	Fernández-Suarez et al., 2014	Stephan et al., 2018	2044.2	10.2	96.5463		633.4	4.1	99.4192
OD4	c34	959.8	12.6	961.9	16.5	966.8	45.9	Fernández-Suarez et al., 2014	Stephan et al., 2018	959.8	6.3	99.276		707.9	4.2	99.48
OD4	c35	2098.9	23.3	2077.6	18.5	2056.6	29.1	Fernández-Suarez et al., 2014	Stephan et al., 2018	2056.6	14.55	102.057		819.4	4.7	99.5989
OD4	c37	819.4	9.4	820.3	15.5	822.7	51.4	Fernández-Suarez et al., 2014	Stephan et al., 2018	819.4	4.7	99.5989		1960.1	15.1	99.6429
OD4	c38	3127.6	51.4	3195.1	22.5	3237.7	16.4	Fernández-Suarez et al., 2014	Stephan et al., 2018	3237.7	8.2	96.5994		796	5.8	99.6495
OD4	c39	674.8	9.9	670.1	23.8	654.6	98.6	Fernández-Suarez et al., 2014	Stephan et al., 2018	674.8	4.95	103.086		642.1	3.65	100
OD4	c4	562.2	8.1	572.5	10.7	613.9	41.5	Fernández-Suarez et al., 2014	Stephan et al., 2018	562.2	4.05	91.5784		1005.6	39.6	100.02
OD4	c41	596.1	11.3	607.7	16.8	651	66.3	Fernández-Suarez et al., 2014	Stephan et al., 2018	596.1	5.65	91.5668		2639	19.9	100.068
OD4	c42	644.2	5.9	636.4	16.1	608.9	70.7	Fernández-Suarez et al., 2014	Stephan et al., 2018	644.2	2.95	105.797		653.3	6.15	100.123
OD4	c43	862.8	18.8	846.6	21.1	804.5	59.7	Fernández-Suarez et al., 2014	Stephan et al., 2018	862.8	9.4	107.247		553.3	4.5	100.217
OD4	c44	815.2	18.5	828.2	31.1	863.2	102.4	Fernández-Suarez et al., 2014	Stephan et al., 2018	815.2	9.25	94.4393		669.6	5.05	100.27
OD4	c45	619.7	9.8	623.1	22.2	635.6	96.4	Fernández-Suarez et al., 2014	Stephan et al., 2018	619.7	4.9	97.4984		697.6	12.65	100.302
OD4	c46	620.4	8.4	616.1	15.5	600.2	65.9	Fernández-Suarez et al., 2014	Stephan et al., 2018	620.4	4.2	103.366		624.8	3.25	100.337
OD4	c47	1086.5	24.1	1078.1	29.7	1061.1	75.8	Fernández-Suarez et al., 2014	Stephan et al., 2018	1061.1	37.9	102.394		656	11.9	100.629
OD4	c48	653.3	12.3	653.1	31.4	652.5	133.4	Fernández-Suarez et al., 2014	Stephan et al., 2018	653.3	6.15	100.123		936.7	5.75	100.796
OD4	c49	627.7	14.3	622.1	17.8	601.7	64.7	Fernández-Suarez et al., 2014	Stephan et al., 2018	627.7	7.15	104.321		616.5	5.35	100.867
OD4	c5	817.6	11.5	806.1	16.5	774.3	53.7	Fernández-Suarez et al., 2014	Stephan et al., 2018	817.6	5.75	105.592		809	5.85	100.898
OD4	c50	568	8.9	560.6	10.8	530.5	41.7	Fernández-Suarez et al., 2014	Stephan et al., 2018	568	4.45	107.069		2243.4	12.75	100.932
OD4	c51	2640.8	37.9	2639.8	27.9	2639	39.8	Fernández-Suarez et al., 2014	Stephan et al., 2018	2639	19.9	100.068		667.1	12.95	100.953
OD4	c53	597.1	6.7	594.6	15.2	584.8	68.9	Fernández-Suarez et al., 2014	Stephan et al., 2018	597.1	3.35	102.103		935.5	5.35	100.961
OD4	c55	735.5	10.8	726.2	17.8	697.7	65.3	Fernández-Suarez et al., 2014	Stephan et al., 2018	735.5	5.4	105.418		658.2	3.8	101.339
OD4	c58	1000.4	24.5	1024.3	21.1	1075.7	38.5	Fernández-Suarez et al., 2014	Stephan et al., 2018	1075.7	19.25	92.9999		2647.4	19.25	101.507
OD4	c59	669.6	10.1	669.1	17.6	667.8	68.8	Fernández-Suarez et al., 2014	Stephan et al., 2018	669.6	5.05	100.27		2597.4	13.15	101.59
OD4	c6	796.5	12.8	817.7	20.7	876	67.4	Fernández-Suarez et al., 2014	Stephan et al., 2018	796.5	6.4	90.9247		603.3	4.25	101.685
OD4	c60	634.3	11.9	631	26.7	619.4	114.9	Fernández-Suarez et al., 2014	Stephan et al., 2018	634.3	5.95	102.406		1976.9	9.9	101.73
OD4	c7	767.3	10.1	752.6	17.3	709.3	62.3	Fernández-Suarez et al., 2014	Stephan et al., 2018	767.3	5.05	108.177		722.7	4.8	101.774
OD4	c9	660.8	13.4	652.9	30.9	625.6	130.3	Fernández-Suarez et al., 2014	Stephan et al., 2018	660.8	6.7	105.627		2014	14.25	101.812
OD4	d1	2205.2	23.1	2273.9	17.5	2336.2	25.4	Fernández-Suarez et al., 2014	Stephan et al., 2018	2336.2	12.7	94.3926		938.3	8.2	101.934
OD4	d10	1030.5	14.9	1020.5	31.5	999.1	94.1	Fernández-Suarez et al., 2014	Stephan et al., 2018	999.1	47.05	103.143		629.2	3.65	102.01
OD4	d11	809	11.7	807.1	18.4	801.8	61.1	Fernández-Suarez et al., 2014	Stephan et al., 2018	809	5.85	100.898		2056.6	14.55	102.057
OD4	d12	566.5	6.6	568.5	9.2	576.8	37.8	Fernández-Suarez et al., 2014	Stephan et al., 2018	566.5	3.3	98.2143		597.1	3.35	102.103
OD4	d13	629.2	7.3	626.5	10.8	616.8	42.5	Fernández-Suarez et al., 2014	Stephan et al., 2018	629.2	3.65	102.01		647.3	4.95	102.114
OD4	d14	744.9	10.5	737.3	14.4	714.2	49.2	Fernández-Suarez et al., 2014	Stephan et al., 2018	744.9	5.25	104.299		971.8	5.2	102.23
OD4	d15	717.1	11.8	727.1	15	758	48.7	Fernández-Suarez et al., 2014	Stephan et al., 2018	717.1	5.9	94.6042		1061.1	37.9	102.394
OD4	d17	681.3	7.3	671.1	10.1	636.9	36.7	Fernández-Suarez et al., 2014	Stephan et al., 2018	681.3	3.65	106.971		634.3	5.95	102.406
OD4	d18	722.7	9.6	719.6	11.6	710.1	37.3	Fernández-Suarez et al., 2014	Stephan et al., 2018	722.7	4.8	101.774		636	4.25	102.929
OD4	d19	796	11.6	796.8	25.6	798.8	91.5	Fernández-Suarez et al., 2014	Stephan et al., 2018	796	5.8	99.6495		839.5	6.1	103.006
OD4	d2	581.7	10	575.4	17.6	550.9	78.2	Fernández-Suarez et al., 2014	Stephan et al., 2018	581.7	5	105.591		674.8	4.95	103.086
OD4	d20	690.6	7.6	682.3	10.7	654.9	39.2	Fernández-Suarez et al., 2014	Stephan et al., 2018	690.6	3.8	105.451		999.1	47.05	103.143
OD4	d21	616.7	6.9	609	11.3	580.6	47.3	Fernández-Suarez et al., 2014	Stephan et al., 2018	616.7	3.45	106.218		651.1	7.1	103.251
OD4	d22	647.9	6.3	641	9.8	616.6	38.7	Fernández-Suarez et al., 2014	Stephan et al., 2018	647.9	3.15	105.076		620.4	4.2	103.366
OD4	d23	572.6	8.4	582.5	14.4	621.6	61.9	Fernández-Suarez et al., 2014	Stephan et al., 2018	572.6	4.2	92.1171		1060	47.6	103.406
OD4	d24	647.3	9.9	644.3	18.4	633.9	75.3	Fernández-Suarez et al., 2014	Stephan et al., 2018	647.3	4.95	102.114		674.6	4.3	103.435
OD4	d25	687.1	8.3	693.5	10.4	714	34.7	Fernández-Suarez et al., 2014	Stephan et al., 2018	687.1	4.15	96.2325		597.3	4.1	103.482
OD4	d26	608.7	6.1	621.7	11.7	669.4	48.8	Fernández-Suarez et al., 2014	Stephan et al., 2018	608.7	3.05	90.9322		798.4	4.75	103.621
OD4	d28	624.8	6.5	624.4	12	622.7	50.4	Fernández-Suarez et al., 2014	Stephan et al., 2018	624.8	3.25	100.337		2461.4	13.25	103.884
OD4	d29	656	7.4	664	12.6	691.1	49.2	Fernández-Suarez et al., 2014	Stephan et al., 2018	656	3.7	94.9211		584.6	3.75	103.947
OD4	d3	707.9	8.4	708.8	14.8	711.6	55.6	Fernández-Suarez et al., 2014	Stephan et al., 2018	707.9	4.2	99.48		744.9	5.25	104.299
OD4	d30	650.7	7.2	662.4	12.5	702.6	49	Fernández-Suarez et al., 2014	Stephan et al., 2018	650.7	3.6	92.6132		617.5	3.6	104.307
OD4	d31	588.4	5.8	593.5	8.1	613.3	32.1	Fernández-Suarez et al., 2014	Stephan et al., 2018	588.4	2.9	95.94		627.7	7.15	104.321
OD4	d32	938.3	16.4	933	30.6	920.5	95.4	Fernández-Suarez et al., 2014	Stephan et al., 2018	938.3	8.2	101.934		670.5	6.4	104.733
OD4	d33	592.5	9.2	599.1	11.9	624.4	44.2	Fernández-Suarez et al., 2014	Stephan et al., 2018	592.5	4.6	94.8911		1002.7	38.55	105.056
OD4	d34	629.7	7.3	638.4	11.8	669.2	46.6	Fernández-Suarez et al., 2014	Stephan et al., 2018	629.7	3.65	94.0974		647.9	3.15	105.076
OD4	d35	888	9.5	902.7	10.8	938.7	28.8	Fernández-Suarez et al., 2014	Stephan et al., 2018	888	4.75	94.5989		735.5	5.4	105.418
OD4	d36	649.7	8.7	656.1	28.1	677.8	120.6	Fernández-Suarez et al., 2014	Stephan et al., 2018	649.7	4.35	95.8542		690.6	3.8	105.451
OD4	d37	681.6	8.2	685.5	10.8	698	37.3	Fernández-Suarez et al., 2014	Stephan et al., 2018	681.6	4.1	97.6504		581.7	5	105.591
OD4	d38	597.3	8.2	593.2	13.8	577.2	58.8	Fernández-Suarez et al., 2014	Stephan et al., 2018	597.3	4.1	103.482		817.6	5.75	105.592
OD4	d39	616.6	8	621.6	20.1	639.9	88.2	Fernández-Suarez et al., 2014	Stephan et al., 2018	616.6	4	96.3588		660.8	6.7	105.627
OD4	d41	661.2	8.6	667.6	12.5	689	46.3	Fernández-Suarez et al., 2014	Stephan et al., 2018	661.2	4.3	95.9652		612.4	4.6	105.75
OD4	d42	1913.1	18	1937.4	14	1963.6	21.5	Fernández-Suarez et al., 2014	Stephan et al., 2018	1963.6	10.75	97.4282		644.2	2.95	105.797
OD4	d43	895	9.9	912.5	10.8	955	27.7	Fernández-Suarez et al., 2014	Stephan et al., 2018	895	4.95	93.7173		999.4	16.1	105.813
OD4	d44	589.1	6.3	599.6	14.6	639.6	64.8	Fernández-Suarez et al., 2014	Stephan et al., 2018	589.1	3.15	92.1044		616.7	3.45	106.218
OD4	d45	1971.4	22.8	2003.2	13.7	2036	14.3	Fernández-Suarez et al., 2014	Stephan et al., 2018	2036	7.15	96.8271		662.2	4.05	106.224
OD4	d46	2557	29.3	2504	19.5	2461.4	26.5	Fernández-Suarez et al., 2014	Stephan et al., 2018	2461.4	13.25	103.884		910.6	7.15	106.242
OD4	d47	824.6	8.8	839.6	16.1	879.2	53.5	Fernández-Suarez et al., 2014	Stephan et al., 2018	824.6	4.4	93.7898		615.6	3.25	106.45
OD4	d48	2340.1	24.3	2381.6	16.3	2417.4	21.7	Fernández-Suarez et al., 2014	Stephan et al., 2018	2417.4	10.85	96.8023		574	2.35	106.513
OD4	d5	605.1	6.1	615.9	10.5	655.8	43.1	Fernández-Suarez et al., 2014	Stephan et al., 2018	605.1	3.05	92.269		703	4.8	106.612
OD4	d51	648.8	5.9	652.4	15.1	665.1	63.8	Fernández-Suarez et al., 2014	Stephan et al., 2018	648.8	2.95	97.5492		681.3	3.65	106.971
OD4	d52	615.6	6.5	607.7	7.3	578.3	25.1	Fernández-Suarez et al., 2014	Stephan et al., 2018	615.6	3.25	106.45		609.8	5.5	107.058
OD4	d53	619.1	6.4	629.5	12.1	666.9	50.2	Fernández-Suarez et al., 2014	Stephan et al., 2018	619.1	3.2	92.8325		568	4.45	107.069
OD4	d54	2362.9	30.5	2402.3	16.8	2435.9	16.6	Fernández-Suarez et al., 2014	Stephan et al., 2018	2435.9	8.3	97.0032		862.8	9.4	107.247
OD4	d55	2264.3	20.7	2253.3	16.5	2243.4	25.5	Fernández-Suarez et al., 2014	Stephan et al., 2018	2243.4	12.75	100.932		798.8	10.2	107.582
OD4	d56	1057.5	12	1038.7	13	999.4	32.2	Fernández-Suarez et al., 2014	Stephan et al., 2018	999.4	16.1	105.813		676.5	4.45	107.603
OD4	d57	633.4	8.2	634.2	16.3	637.1	68.4	Fernández-Suarez et al., 2014	Stephan et al., 2018	633.4	4.1	99.4192		681.3	3.85	107.989
OD4	d58	798.4	9.5	791.1	15.1	770.5	51.3	Fernández-Suarez et al., 2014	Stephan et al., 2018	798.4	4.75	103.621		767.3	5.05	108.177
OD4	d59	686.8	8.9	688.6	25.1	694.5	102.8	Fernández-Suarez et al., 2014	Stephan et al., 2018	686.8	4.45	98.8913		664.9	4.3	108.343
OD4	d6	651.1	14.2	646.5	27.3	630.6	112.3	Fernández-Suarez et al., 2014	Stephan et al., 2018	651.1	7.1	103.251		620.8	4.65	108.512
OD4	d60	1007.5	10.5	1029.8	16.3	1077.5	45.1	Fernández-Suarez et al., 2014	Stephan et al., 2018	1077.5	22.55	93.5035		967.5	61.9	108.796
OD4	d7	838.1	9.1	850.6	8.7	883.2	20.2	Fernández-Suarez et al., 2014	Stephan et al., 2018	838.1	4.55	94.8936		672.3	6.6	109.442
OD4	d8	576.5	11.5	587.6	17.8	630.8	73.2	Fernández-Suarez et al., 2014	Stephan et al., 2018	576.5	5.75	91.3919		602.9	11.15	109.459
OD4	d9	910.6	14.3	895.1	25.6	857.1	82.2	Fernández-Suarez et al., 2014	Stephan et al., 2018	910.6	7.15	106.242		708.5	3.65	109.472
														G6	Emsian
G6	a10	1233.6	36.3	1262.1	47.4	1311.1	110.8	Gutiérrez-Alonso et al., 2015	Stephan et al., 2018	1311.1	55.4	94.0889		2669.9	12.55	89.6288
G6	a11	845.2	33.6	825.8	29.1	774	61.2	Gutiérrez-Alonso et al., 2015	Stephan et al., 2018	845.2	16.8	109.199		694.8	9.3	90.5513
G6	a13	521.7	14	529.9	17.1	565.3	66.9	Gutiérrez-Alonso et al., 2015	Stephan et al., 2018	521.7	7	92.2873		549	7.6	91.075
G6	a13	2170.4	48.7	2138.8	24.3	2108.5	11.8	Gutiérrez-Alonso et al., 2015	Stephan et al., 2018	2108.5	5.9	102.936		2704.8	10.65	91.5447
G6	a14	2393	91.4	2545.8	44.9	2669.9	25.1	Gutiérrez-Alonso et al., 2015	Stephan et al., 2018	2669.9	12.55	89.6288		563.8	8.6	91.6003
G6	a14	2083.3	46.7	2037.7	27.6	1991.8	30.9	Gutiérrez-Alonso et al., 2015	Stephan et al., 2018	1991.8	15.45	104.594		2639.7	7.2	92.2491
G6	a15	1331.4	37.4	1335.3	32.8	1341.6	60.7	Gutiérrez-Alonso et al., 2015	Stephan et al., 2018	1341.6	30.35	99.2397		521.7	7	92.2873
G6	a15	721.9	18.2	707.8	17.4	663.1	45.5	Gutiérrez-Alonso et al., 2015	Stephan et al., 2018	721.9	9.1	108.867		783.9	9.95	93.7567
G6	a16	1059.9	25.5	1072.5	19.7	1098.2	28.9	Gutiérrez-Alonso et al., 2015	Stephan et al., 2018	1098.2	14.45	96.5125		2172.7	9.35	93.8602
G6	a16	2046.3	48.4	2000	27.4	1952.6	26.5	Gutiérrez-Alonso et al., 2015	Stephan et al., 2018	1952.6	13.25	104.799		1107.8	42.85	93.9429
G6	a17	1962.7	46.2	1950.7	27.1	1937.9	27.2	Gutiérrez-Alonso et al., 2015	Stephan et al., 2018	1937.9	13.6	101.28		1311.1	55.4	94.0889
G6	a17	692.5	17.9	680.4	16.2	640.9	38.4	Gutiérrez-Alonso et al., 2015	Stephan et al., 2018	692.5	8.95	108.051		1124.8	70.55	94.1323
G6	a18	2525.1	60.2	2610.2	28.6	2677	16.4	Gutiérrez-Alonso et al., 2015	Stephan et al., 2018	2677	8.2	94.3257		2677	8.2	94.3257
G6	a18	1928.9	49	1900.8	32.9	1870.3	44.4	Gutiérrez-Alonso et al., 2015	Stephan et al., 2018	1870.3	22.2	103.133		898.7	13.05	94.8496
G6	a19	855.4	21.3	854.2	24.9	851.1	70.5	Gutiérrez-Alonso et al., 2015	Stephan et al., 2018	855.4	10.65	100.505		967.9	12.45	94.855
G6	a19	658.2	18.6	647.4	19.6	609.8	60.6	Gutiérrez-Alonso et al., 2015	Stephan et al., 2018	658.2	9.3	107.937		708.7	9.05	95.3707
G6	a2	694.8	18.6	712.2	26.2	767.3	89.6	Gutiérrez-Alonso et al., 2015	Stephan et al., 2018	694.8	9.3	90.5513		913.8	12.45	95.5059
G6	a2	2121.4	51.5	2061.3	28.3	2001.7	26.4	Gutiérrez-Alonso et al., 2015	Stephan et al., 2018	2001.7	13.2	105.98		935.6	14.5	95.5669
G6	a20	2435.1	71.4	2548.3	33.8	2639.7	14.4	Gutiérrez-Alonso et al., 2015	Stephan et al., 2018	2639.7	7.2	92.2491		1123.1	19.55	95.6371
G6	a20	935.6	29	948.7	27.7	979	61.4	Gutiérrez-Alonso et al., 2015	Stephan et al., 2018	935.6	14.5	95.5669		1091.1	38.6	95.6833
G6	a21	931.7	24.6	919.4	19.4	890.1	31.4	Gutiérrez-Alonso et al., 2015	Stephan et al., 2018	931.7	12.3	104.674		1161.2	54.75	95.7802
G6	a22	1140.3	31.9	1124.1	53.7	1092.9	146	Gutiérrez-Alonso et al., 2015	Stephan et al., 2018	1092.9	73	104.337		790.7	14	95.982
G6	a22	1063.7	26.4	1039.3	25.8	988.5	59.2	Gutiérrez-Alonso et al., 2015	Stephan et al., 2018	988.5	29.6	107.607		715.6	10.65	96.2216
G6	a24	967.9	24.9	984.1	25	1020.4	57.3	Gutiérrez-Alonso et al., 2015	Stephan et al., 2018	967.9	12.45	94.855		2036.6	19.35	96.2536
G6	a24	708.7	18.1	717	18.2	743.1	48.5	Gutiérrez-Alonso et al., 2015	Stephan et al., 2018	708.7	9.05	95.3707		1978.1	7	96.3955
G6	a25	2152.9	53.5	2099.7	29.7	2048	29.1	Gutiérrez-Alonso et al., 2015	Stephan et al., 2018	2048	14.55	105.122		1098.2	14.45	96.5125
G6	a26	1165.1	28.3	1130.6	26.3	1064.9	56.5	Gutiérrez-Alonso et al., 2015	Stephan et al., 2018	1064.9	28.25	109.409		807.8	10.65	97.1264
G6	a27	1922.6	44.7	1898.3	26.6	1871.7	27.6	Gutiérrez-Alonso et al., 2015	Stephan et al., 2018	1871.7	13.8	102.719		1161.1	20.15	97.2354
G6	a27	1157	28.8	1121.9	34.2	1054.6	85.3	Gutiérrez-Alonso et al., 2015	Stephan et al., 2018	1054.6	42.65	109.71		2554.1	8.5	97.3768
G6	a28	1622.5	42	1597.5	26.1	1564.5	26	Gutiérrez-Alonso et al., 2015	Stephan et al., 2018	1564.5	13	103.707		954.6	13.8	97.6373
G6	a28	1974.6	45.1	1931.4	25	1885.5	20.9	Gutiérrez-Alonso et al., 2015	Stephan et al., 2018	1885.5	10.45	104.726		1954.4	11.3	97.8101
G6	a29	549	15.2	559.6	18.7	602.8	70.3	Gutiérrez-Alonso et al., 2015	Stephan et al., 2018	549	7.6	91.075		1058.1	20.2	98.2516
G6	a29	2636.5	85.3	2588.6	39.5	2551.4	25.5	Gutiérrez-Alonso et al., 2015	Stephan et al., 2018	2551.4	12.75	103.335		1865.2	35.25	98.6382
G6	a3	1074.1	26	1090.4	21.9	1123.1	39.1	Gutiérrez-Alonso et al., 2015	Stephan et al., 2018	1123.1	19.55	95.6371		1107	23	98.7444
G6	a3	799.3	21	795	21	783.2	54.6	Gutiérrez-Alonso et al., 2015	Stephan et al., 2018	799.3	10.5	102.056		2093.2	12.8	98.7913
G6	a30	1911.6	48.1	1932.2	27.4	1954.4	22.6	Gutiérrez-Alonso et al., 2015	Stephan et al., 2018	1954.4	11.3	97.8101		1090.8	31.35	99.1657
G6	a30	1051.1	24.8	1050.9	18	1050.4	19.8	Gutiérrez-Alonso et al., 2015	Stephan et al., 2018	1050.4	9.9	100.067		1950.3	12.55	99.195
G6	a31	1958	45.8	1960.9	28	1964.1	31.1	Gutiérrez-Alonso et al., 2015	Stephan et al., 2018	1964.1	15.55	99.6894		1341.6	30.35	99.2397
G6	a32	1040.7	36.2	1062.6	37.6	1107.8	85.7	Gutiérrez-Alonso et al., 2015	Stephan et al., 2018	1107.8	42.85	93.9429		1006.4	51.05	99.5827
G6	a32	683.8	17.5	675.3	16.5	647.3	42.9	Gutiérrez-Alonso et al., 2015	Stephan et al., 2018	683.8	8.75	105.639		1964.1	15.55	99.6894
G6	a33	2119.1	54.4	2077.9	27.9	2037.4	16.7	Gutiérrez-Alonso et al., 2015	Stephan et al., 2018	2037.4	8.35	104.01		1050.4	9.9	100.067
G6	a35	1114.3	34	1093.7	26.1	1052.9	41.3	Gutiérrez-Alonso et al., 2015	Stephan et al., 2018	1052.9	20.65	105.832		1615.4	19.8	100.192
G6	a36	1039.6	27.1	1045.6	22.6	1058.1	40.4	Gutiérrez-Alonso et al., 2015	Stephan et al., 2018	1058.1	20.2	98.2516		771.3	9.65	100.351
G6	a36	1122.5	33.1	1120.7	24.1	1117.2	30.3	Gutiérrez-Alonso et al., 2015	Stephan et al., 2018	1117.2	15.15	100.474		2042.1	10.6	100.411
G6	a37	1058.8	30.9	1080.6	51.5	1124.8	141.1	Gutiérrez-Alonso et al., 2015	Stephan et al., 2018	1124.8	70.55	94.1323		1117.2	15.15	100.474
G6	a38	2476.1	54.5	2603.9	27.6	2704.8	21.3	Gutiérrez-Alonso et al., 2015	Stephan et al., 2018	2704.8	10.65	91.5447		855.4	10.65	100.505
G6	a38	790.7	28	799.4	23.1	823.8	38.2	Gutiérrez-Alonso et al., 2015	Stephan et al., 2018	790.7	14	95.982		2139.1	15.7	100.58
G6	a39	1129	26.8	1140	22.5	1161.1	40.3	Gutiérrez-Alonso et al., 2015	Stephan et al., 2018	1161.1	20.15	97.2354		2029	12.85	100.991
G6	a39	1618.5	40.4	1617.1	28.6	1615.4	39.6	Gutiérrez-Alonso et al., 2015	Stephan et al., 2018	1615.4	19.8	100.192		1055.5	24.75	101.194
G6	a4	1839.8	66.8	1851.8	48.6	1865.2	70.5	Gutiérrez-Alonso et al., 2015	Stephan et al., 2018	1865.2	35.25	98.6382		1937.9	13.6	101.28
G6	a40	1072.4	30.6	1067.4	23.2	1057.1	33.2	Gutiérrez-Alonso et al., 2015	Stephan et al., 2018	1057.1	16.6	101.447		1057.1	16.6	101.447
G6	a40	2064.1	51.8	1991.3	27.3	1916.6	19.9	Gutiérrez-Alonso et al., 2015	Stephan et al., 2018	1916.6	9.95	107.696		1994.5	11.55	102.031
G6	a41	2250.5	52.6	2169.6	27.6	2094	23.8	Gutiérrez-Alonso et al., 2015	Stephan et al., 2018	2094	11.9	107.474		799.3	10.5	102.056
G6	a42	913.8	24.9	926.5	23.3	956.8	50.7	Gutiérrez-Alonso et al., 2015	Stephan et al., 2018	913.8	12.45	95.5059		643.6	8.8	102.289
G6	a43	699.4	42.4	695.4	36.3	682.7	70.5	Gutiérrez-Alonso et al., 2015	Stephan et al., 2018	699.4	21.2	102.446		1199.7	47.85	102.342
G6	a43	2135.3	49.3	2046.6	27.1	1958.3	26.3	Gutiérrez-Alonso et al., 2015	Stephan et al., 2018	1958.3	13.15	109.038		699.4	21.2	102.446
G6	a44	1093.1	26.6	1097.8	23.5	1107	46	Gutiérrez-Alonso et al., 2015	Stephan et al., 2018	1107	23	98.7444		1871.7	13.8	102.719
G6	a44	874.6	27.2	855.3	22.4	805.5	41.7	Gutiérrez-Alonso et al., 2015	Stephan et al., 2018	874.6	13.6	108.579		2637.6	11.15	102.753
G6	a46	807.8	21.3	814.2	22.7	831.7	60.8	Gutiérrez-Alonso et al., 2015	Stephan et al., 2018	807.8	10.65	97.1264		2108.5	5.9	102.936
G6	a46	2151.5	49.2	2145.2	28.9	2139.1	31.4	Gutiérrez-Alonso et al., 2015	Stephan et al., 2018	2139.1	15.7	100.58		1964.1	17.45	102.963
G6	a47	1002.2	33.1	1003.5	39.3	1006.4	102.1	Gutiérrez-Alonso et al., 2015	Stephan et al., 2018	1006.4	51.05	99.5827		2025	13.55	102.973
G6	a47	675.1	20.3	663.9	24.2	626.4	82.4	Gutiérrez-Alonso et al., 2015	Stephan et al., 2018	675.1	10.15	107.775		1870.3	22.2	103.133
G6	a48	1906.8	69.2	1941.2	36.9	1978.1	14	Gutiérrez-Alonso et al., 2015	Stephan et al., 2018	1978.1	7	96.3955		2551.4	12.75	103.335
G6	a48	1026.4	47.3	1012.3	46.1	981.9	105.6	Gutiérrez-Alonso et al., 2015	Stephan et al., 2018	981.9	52.8	104.532		1564.5	13	103.707
G6	a49	783.9	19.9	797.6	26.9	836.1	84.4	Gutiérrez-Alonso et al., 2015	Stephan et al., 2018	783.9	9.95	93.7567		2037.4	8.35	104.01
G6	a49	2858.8	59.4	2738.8	26.8	2651.6	19.5	Gutiérrez-Alonso et al., 2015	Stephan et al., 2018	2651.6	9.75	107.814		2111.7	13.85	104.106
G6	a5	771.3	19.3	770.6	16.3	768.6	30.6	Gutiérrez-Alonso et al., 2015	Stephan et al., 2018	771.3	9.65	100.351		693.6	9.3	104.222
G6	a5	693.6	18.6	687	17.1	665.5	41.2	Gutiérrez-Alonso et al., 2015	Stephan et al., 2018	693.6	9.3	104.222		1092.9	73	104.337
G6	a50	1112.2	36.2	1128.9	44.7	1161.2	109.5	Gutiérrez-Alonso et al., 2015	Stephan et al., 2018	1161.2	54.75	95.7802		981.9	52.8	104.532
G6	a50	2198.4	52.4	2153.9	28.8	2111.7	27.7	Gutiérrez-Alonso et al., 2015	Stephan et al., 2018	2111.7	13.85	104.106		1991.8	15.45	104.594
G6	a51	1086.1	27.9	1069.1	20.8	1034.8	29.6	Gutiérrez-Alonso et al., 2015	Stephan et al., 2018	1034.8	14.8	104.957		931.7	12.3	104.674
G6	a51	906	25.5	885.5	21.1	834.5	39.7	Gutiérrez-Alonso et al., 2015	Stephan et al., 2018	906	12.75	108.568		1877.9	14.1	104.718
G6	a52	1960.3	46.5	1997.7	30.7	2036.6	38.7	Gutiérrez-Alonso et al., 2015	Stephan et al., 2018	2036.6	19.35	96.2536		1885.5	10.45	104.726
G6	a52	2487.1	55.5	2524.1	26.8	2554.1	17	Gutiérrez-Alonso et al., 2015	Stephan et al., 2018	2554.1	8.5	97.3768		2070.3	8.65	104.748
G6	a53	1044	30.8	1059.3	32.9	1091.1	77.2	Gutiérrez-Alonso et al., 2015	Stephan et al., 2018	1091.1	38.6	95.6833		1952.6	13.25	104.799
G6	a54	2710.2	57.3	2668.8	27.5	2637.6	22.3	Gutiérrez-Alonso et al., 2015	Stephan et al., 2018	2637.6	11.15	102.753		1034.8	14.8	104.957
G6	a55	1068.1	29.4	1063.9	25.5	1055.5	49.5	Gutiérrez-Alonso et al., 2015	Stephan et al., 2018	1055.5	24.75	101.194		2007	7.8	105.102
G6	a57	1934.6	43.8	1942.2	25.7	1950.3	25.1	Gutiérrez-Alonso et al., 2015	Stephan et al., 2018	1950.3	12.55	99.195		2048	14.55	105.122
G6	a57	1081.7	29.7	1084.7	28.8	1090.8	62.7	Gutiérrez-Alonso et al., 2015	Stephan et al., 2018	1090.8	31.35	99.1657		683.8	8.75	105.639
G6	a58	954.6	27.6	961.6	24.7	977.7	50.3	Gutiérrez-Alonso et al., 2015	Stephan et al., 2018	954.6	13.8	97.6373		824.3	14.8	105.734
G6	a58	2109.4	50.7	2058	26	2007	15.6	Gutiérrez-Alonso et al., 2015	Stephan et al., 2018	2007	7.8	105.102		1052.9	20.65	105.832
G6	a59	2067.9	114.8	2080.6	58.8	2093.2	25.6	Gutiérrez-Alonso et al., 2015	Stephan et al., 2018	2093.2	12.8	98.7913		2001.7	13.2	105.98
G6	a6	1031.9	26.6	1012.3	24.5	970	53.3	Gutiérrez-Alonso et al., 2015	Stephan et al., 2018	970	26.65	106.381		970	26.65	106.381
G6	a60	563.8	17.2	574.2	18.9	615.5	62.9	Gutiérrez-Alonso et al., 2015	Stephan et al., 2018	563.8	8.6	91.6003		2094	11.9	107.474
G6	a60	2161.7	56.4	2070.9	29	1981.8	20.7	Gutiérrez-Alonso et al., 2015	Stephan et al., 2018	1981.8	10.35	109.078		988.5	29.6	107.607
G6	a61	715.6	21.3	722.4	27.1	743.7	88.6	Gutiérrez-Alonso et al., 2015	Stephan et al., 2018	715.6	10.65	96.2216		1916.6	9.95	107.696
G6	a61	2897.5	73.8	2753.6	32.2	2649.7	20.6	Gutiérrez-Alonso et al., 2015	Stephan et al., 2018	2649.7	10.3	109.352		675.1	10.15	107.775
G6	a62	2039.3	60.3	2106.5	32.1	2172.7	18.7	Gutiérrez-Alonso et al., 2015	Stephan et al., 2018	2172.7	9.35	93.8602		2651.6	9.75	107.814
G6	a62	2170.4	57.3	2076.8	29.6	1985.2	21.9	Gutiérrez-Alonso et al., 2015	Stephan et al., 2018	1985.2	10.95	109.329		737.5	9.95	107.885
G6	a63	2022.3	46	1993.7	28.7	1964.1	34.9	Gutiérrez-Alonso et al., 2015	Stephan et al., 2018	1964.1	17.45	102.963		658.2	9.3	107.937
G6	a63	824.3	29.6	812.3	36.5	779.6	111.4	Gutiérrez-Alonso et al., 2015	Stephan et al., 2018	824.3	14.8	105.734		692.5	8.95	108.051
G6	a64	643.6	17.6	640.4	24.6	629.2	92.7	Gutiérrez-Alonso et al., 2015	Stephan et al., 2018	643.6	8.8	102.289		906	12.75	108.568
G6	a64	2085.2	46.7	2055	26.7	2025	27.1	Gutiérrez-Alonso et al., 2015	Stephan et al., 2018	2025	13.55	102.973		874.6	13.6	108.579
G6	a65	2049.1	52.3	2039.1	29.1	2029	25.7	Gutiérrez-Alonso et al., 2015	Stephan et al., 2018	2029	12.85	100.991		721.9	9.1	108.867
G6	a66	2050.5	47.6	2046.4	26.1	2042.1	21.2	Gutiérrez-Alonso et al., 2015	Stephan et al., 2018	2042.1	10.6	100.411		1958.3	13.15	109.038
G6	a66	2168.6	49.2	2118.5	25.3	2070.3	17.3	Gutiérrez-Alonso et al., 2015	Stephan et al., 2018	2070.3	8.65	104.748		1981.8	10.35	109.078
G6	a7	898.7	26.1	912.9	21.1	947.5	33.4	Gutiérrez-Alonso et al., 2015	Stephan et al., 2018	898.7	13.05	94.8496		845.2	16.8	109.199
G6	a7	1966.5	44.1	1923.7	26.2	1877.9	28.2	Gutiérrez-Alonso et al., 2015	Stephan et al., 2018	1877.9	14.1	104.718		1985.2	10.95	109.329
G6	a8	1227.8	32.1	1217.6	40	1199.7	95.7	Gutiérrez-Alonso et al., 2015	Stephan et al., 2018	1199.7	47.85	102.342		2649.7	10.3	109.352
G6	a8	2035	45.9	2015	25.7	1994.5	23.1	Gutiérrez-Alonso et al., 2015	Stephan et al., 2018	1994.5	11.55	102.031		1064.9	28.25	109.409
G6	a9	737.5	19.9	724.3	17.8	683.6	41.2	Gutiérrez-Alonso et al., 2015	Stephan et al., 2018	737.5	9.95	107.885		1054.6	42.65	109.71
														G7	Frasnian
G7	a10	2590.1	57.2	2608.3	27.2	2622.5	18.7	Gutiérrez-Alonso et al., 2015	Stephan et al., 2018	2622.5	9.35	98.7645		923.9	14.05	90.357
G7	a10	1391.4	34.5	1359.2	79.9	1309	200.1	Gutiérrez-Alonso et al., 2015	Stephan et al., 2018	1309	100.05	106.295		596.2	7.8	90.4155
G7	a11	827.1	23.9	840.2	36.5	875.1	115.7	Gutiérrez-Alonso et al., 2015	Stephan et al., 2018	827.1	11.95	94.5149		1237.7	43.9	90.4258
G7	a11	1573.7	39.2	1553.6	28.8	1526.4	43.1	Gutiérrez-Alonso et al., 2015	Stephan et al., 2018	1526.4	21.55	103.099		650.6	8.8	90.8279
G7	a13	687.8	19.9	681.9	18.1	662.4	42.6	Gutiérrez-Alonso et al., 2015	Stephan et al., 2018	687.8	9.95	103.835		696.5	9.55	91.0577
G7	a13	2051.5	47.3	1991.5	31.9	1929.8	44.3	Gutiérrez-Alonso et al., 2015	Stephan et al., 2018	1929.8	22.15	106.306		1214.8	40.2	91.2414
G7	a14	923.9	27.8	923.9	41.8	923.9	125.1	Gutiérrez-Alonso et al., 2015	Stephan et al., 2018	923.9	13.9	100		762.1	10.3	91.2585
G7	a15	1032.5	27.8	1045.8	42.8	1073.8	117.9	Gutiérrez-Alonso et al., 2015	Stephan et al., 2018	1073.8	58.95	96.1538		737.5	9.85	92.0724
G7	a15	2203	50.4	2155.1	25.8	2109.7	17.8	Gutiérrez-Alonso et al., 2015	Stephan et al., 2018	2109.7	8.9	104.422		1158.7	30.6	92.086
G7	a16	2016.7	47.1	1964.4	32.3	1909.8	45.6	Gutiérrez-Alonso et al., 2015	Stephan et al., 2018	1909.8	22.8	105.597		916.6	12.5	92.6233
G7	a17	650.6	17.6	665.5	17.8	716.3	48.7	Gutiérrez-Alonso et al., 2015	Stephan et al., 2018	650.6	8.8	90.8279		686.1	9.8	93.4232
G7	a18	868.9	22	881.4	21.5	912.8	50.4	Gutiérrez-Alonso et al., 2015	Stephan et al., 2018	868.9	11	95.1906		572.1	8.05	93.6947
G7	a18	1828.7	45.1	1849.5	27.3	1873.1	27.1	Gutiérrez-Alonso et al., 2015	Stephan et al., 2018	1873.1	13.55	97.6296		675.7	9.3	93.8081
G7	a19	2634.8	59.9	2629.4	27.6	2625.3	16.2	Gutiérrez-Alonso et al., 2015	Stephan et al., 2018	2625.3	8.1	100.362		992.2	14.15	93.905
G7	a19	1047.3	27.5	1030.8	25.8	996	56.7	Gutiérrez-Alonso et al., 2015	Stephan et al., 2018	996	28.35	105.151		2153.3	43.8	94.0046
G7	a20	1034.7	27.5	1038.9	21.2	1047.9	30.9	Gutiérrez-Alonso et al., 2015	Stephan et al., 2018	1047.9	15.45	98.7403		546.7	7.1	94.1288
G7	a21	1018.7	27.4	1032.1	22.7	1060.4	39.2	Gutiérrez-Alonso et al., 2015	Stephan et al., 2018	1060.4	19.6	96.0675		1211.2	31.95	94.1876
G7	a21	2869.5	91.7	2734.4	38.1	2636	11.9	Gutiérrez-Alonso et al., 2015	Stephan et al., 2018	2636	5.95	108.858		2937	9.3	94.3718
G7	a22	1288.2	32.4	1302.2	39.5	1325.4	89.3	Gutiérrez-Alonso et al., 2015	Stephan et al., 2018	1325.4	44.65	97.1933		1311.7	57.55	94.4118
G7	a24	1076.8	28.7	1070.2	28.4	1056.9	63.9	Gutiérrez-Alonso et al., 2015	Stephan et al., 2018	1056.9	31.95	101.883		2775.4	9.4	94.4549
G7	a24	2836.4	62.4	2706.1	27	2610.2	14.5	Gutiérrez-Alonso et al., 2015	Stephan et al., 2018	2610.2	7.25	108.666		827.1	11.95	94.5149
G7	a25	686.1	19.6	697.5	18.9	734.4	47.1	Gutiérrez-Alonso et al., 2015	Stephan et al., 2018	686.1	9.8	93.4232		658.2	9.35	94.6097
G7	a25	1007.2	31.2	1019.6	29.1	1046.6	61.2	Gutiérrez-Alonso et al., 2015	Stephan et al., 2018	1046.6	30.6	96.2354		736.9	9.85	94.7416
G7	a26	599.7	16	599.1	17.2	596.9	56.2	Gutiérrez-Alonso et al., 2015	Stephan et al., 2018	599.7	8	100.469		1124.4	18.5	94.8951
G7	a27	2771.7	70.1	2868.4	31.7	2937	18.6	Gutiérrez-Alonso et al., 2015	Stephan et al., 2018	2937	9.3	94.3718		1212.9	27.4	94.9048
G7	a28	676.8	16.8	665.4	18.3	627	57.6	Gutiérrez-Alonso et al., 2015	Stephan et al., 2018	676.8	8.4	107.943		916.6	12.6	94.9156
G7	a29	1062.6	29.1	1072.8	25.6	1093.6	49.7	Gutiérrez-Alonso et al., 2015	Stephan et al., 2018	1093.6	24.85	97.1653		904.3	12.45	95.0994
G7	a29	777.6	22.4	771.7	27.3	754.5	84.8	Gutiérrez-Alonso et al., 2015	Stephan et al., 2018	777.6	11.2	103.062		868.9	11	95.1906
G7	a3	1108.4	34.5	1144.9	36.5	1214.8	80.4	Gutiérrez-Alonso et al., 2015	Stephan et al., 2018	1214.8	40.2	91.2414		1072.4	42.35	95.4588
G7	a3	1140.8	31.1	1165.3	30.5	1211.2	63.9	Gutiérrez-Alonso et al., 2015	Stephan et al., 2018	1211.2	31.95	94.1876		856.5	12.45	95.7197
G7	a30	596.2	15.6	609.6	22.1	659.4	85	Gutiérrez-Alonso et al., 2015	Stephan et al., 2018	596.2	7.8	90.4155		2518.6	14.7	95.7913
G7	a30	1358.6	38.6	1353.5	67.1	1345.6	162.2	Gutiérrez-Alonso et al., 2015	Stephan et al., 2018	1345.6	81.1	100.966		1060.4	19.6	96.0675
G7	a31	1085	29.9	1078.8	21.5	1066.5	24.7	Gutiérrez-Alonso et al., 2015	Stephan et al., 2018	1066.5	12.35	101.735		1073.8	58.95	96.1538
G7	a32	1087.2	28.2	1085	23.3	1080.6	41.7	Gutiérrez-Alonso et al., 2015	Stephan et al., 2018	1080.6	20.85	100.611		1046.6	30.6	96.2354
G7	a32	2149.2	53	2059.6	31.6	1971.2	37.5	Gutiérrez-Alonso et al., 2015	Stephan et al., 2018	1971.2	18.75	109.03		2075.9	13.9	96.4449
G7	a33	1023.7	27.8	1039.3	33.4	1072.4	84.7	Gutiérrez-Alonso et al., 2015	Stephan et al., 2018	1072.4	42.35	95.4588		595.6	8.75	96.4534
G7	a35	2412.6	54.8	2470.5	30	2518.6	29.4	Gutiérrez-Alonso et al., 2015	Stephan et al., 2018	2518.6	14.7	95.7913		605	7.8	96.5066
G7	a35	705.8	18.8	704.9	17.9	702.2	45.5	Gutiérrez-Alonso et al., 2015	Stephan et al., 2018	705.8	9.4	100.513		1093.6	24.85	97.1653
G7	a36	2085.2	49.4	2070.1	25.6	2055.1	14.8	Gutiérrez-Alonso et al., 2015	Stephan et al., 2018	2055.1	7.4	101.465		1325.4	44.65	97.1933
G7	a36	1073	28.1	1056.2	23.1	1021.7	41.8	Gutiérrez-Alonso et al., 2015	Stephan et al., 2018	1021.7	20.9	105.021		1084.5	137.5	97.326
G7	a37	916.6	25.2	931.2	21.5	965.7	39.6	Gutiérrez-Alonso et al., 2015	Stephan et al., 2018	916.6	12.6	94.9156		1873.1	13.55	97.6296
G7	a38	605	15.6	609.7	14.5	626.9	35.4	Gutiérrez-Alonso et al., 2015	Stephan et al., 2018	605	7.8	96.5066		1090.1	16.5	97.725
G7	a39	2024.2	75.1	2088.9	58.6	2153.3	87.6	Gutiérrez-Alonso et al., 2015	Stephan et al., 2018	2153.3	43.8	94.0046		1039.8	17.3	97.9708
G7	a39	1018.7	27.1	1025.4	21.6	1039.8	34.6	Gutiérrez-Alonso et al., 2015	Stephan et al., 2018	1039.8	17.3	97.9708		708.1	9.75	98.17
G7	a4	675.7	18.6	686	36	720.3	140.4	Gutiérrez-Alonso et al., 2015	Stephan et al., 2018	675.7	9.3	93.8081		1991.8	14.05	98.4687
G7	a4	2353.8	59	2248.3	38.9	2153.6	54	Gutiérrez-Alonso et al., 2015	Stephan et al., 2018	2153.6	27	109.296		1132	40.65	98.7279
G7	a40	2002.1	49.7	2038.6	29	2075.9	27.8	Gutiérrez-Alonso et al., 2015	Stephan et al., 2018	2075.9	13.9	96.4449		1047.9	15.45	98.7403
G7	a40	1024.2	26.6	1024.5	21.6	1025	37	Gutiérrez-Alonso et al., 2015	Stephan et al., 2018	1025	18.5	99.922		2622.5	9.35	98.7645
G7	a43	736.9	19.7	747.1	23.4	777.8	71.7	Gutiérrez-Alonso et al., 2015	Stephan et al., 2018	736.9	9.85	94.7416		1051.3	41.4	98.9917
G7	a43	1065.3	27.9	1073.5	21.7	1090.1	33	Gutiérrez-Alonso et al., 2015	Stephan et al., 2018	1090.1	16.5	97.725		724.2	9.4	99.4234
G7	a44	737.5	19.7	753.4	23.7	801	72.2	Gutiérrez-Alonso et al., 2015	Stephan et al., 2018	737.5	9.85	92.0724		1025	18.5	99.922
G7	a46	696.5	19.1	712.9	17.7	764.9	39.8	Gutiérrez-Alonso et al., 2015	Stephan et al., 2018	696.5	9.55	91.0577		923.9	13.9	100
G7	a47	1961.3	47.5	1976.2	28.1	1991.8	28.1	Gutiérrez-Alonso et al., 2015	Stephan et al., 2018	1991.8	14.05	98.4687		1088.1	19.65	100.11
G7	a48	1067	29.6	1097.6	28.9	1158.7	61.2	Gutiérrez-Alonso et al., 2015	Stephan et al., 2018	1158.7	30.6	92.086		2035.3	5.45	100.128
G7	a49	923.9	28.1	953.5	32.2	1022.5	82.3	Gutiérrez-Alonso et al., 2015	Stephan et al., 2018	923.9	14.05	90.357		2625.3	8.1	100.362
G7	a49	992.2	28.3	1012.5	22	1056.6	30.5	Gutiérrez-Alonso et al., 2015	Stephan et al., 2018	992.2	14.15	93.905		599.7	8	100.469
G7	a5	762.1	20.6	781	25.1	835.1	75.4	Gutiérrez-Alonso et al., 2015	Stephan et al., 2018	762.1	10.3	91.2585		705.8	9.4	100.513
G7	a50	2693.7	64.3	2672.2	29.1	2656	16.6	Gutiérrez-Alonso et al., 2015	Stephan et al., 2018	2656	8.3	101.419		1080.6	20.85	100.611
G7	a50	1112.7	29.7	1098.8	49.3	1071.3	135.4	Gutiérrez-Alonso et al., 2015	Stephan et al., 2018	1071.3	67.7	103.864		1345.6	81.1	100.966
G7	a51	658.2	18.7	666.7	18.8	695.7	51.4	Gutiérrez-Alonso et al., 2015	Stephan et al., 2018	658.2	9.35	94.6097		2656	8.3	101.419
G7	a51	1055.5	35.5	1065	93.6	1084.5	275	Gutiérrez-Alonso et al., 2015	Stephan et al., 2018	1084.5	137.5	97.326		2055.1	7.4	101.465
G7	a52	1238.4	40.3	1265.4	50.1	1311.7	115.1	Gutiérrez-Alonso et al., 2015	Stephan et al., 2018	1311.7	57.55	94.4118		1066.5	12.35	101.735
G7	a53	2621.5	66.6	2709.3	31.1	2775.4	18.8	Gutiérrez-Alonso et al., 2015	Stephan et al., 2018	2775.4	9.4	94.4549		1056.9	31.95	101.883
G7	a53	1127.3	29.2	1094.2	46.2	1029	127.3	Gutiérrez-Alonso et al., 2015	Stephan et al., 2018	1029	63.65	109.553		748.4	9.7	102.059
G7	a54	1151.1	30.6	1172.7	28	1212.9	54.8	Gutiérrez-Alonso et al., 2015	Stephan et al., 2018	1212.9	27.4	94.9048		2609.2	8.35	102.227
G7	a54	2107.5	50.7	2028.4	31.8	1948.8	40.7	Gutiérrez-Alonso et al., 2015	Stephan et al., 2018	1948.8	20.35	108.143		1008.3	13.5	102.4
G7	a55	572.1	16.1	579.9	17.4	610.6	56.4	Gutiérrez-Alonso et al., 2015	Stephan et al., 2018	572.1	8.05	93.6947		777.6	11.2	103.062
G7	a55	1303.5	32.8	1288.5	61.9	1263.6	156.5	Gutiérrez-Alonso et al., 2015	Stephan et al., 2018	1263.6	78.25	103.158		1526.4	21.55	103.099
G7	a57	2037.9	50.9	2036.6	26.1	2035.3	10.9	Gutiérrez-Alonso et al., 2015	Stephan et al., 2018	2035.3	5.45	100.128		1263.6	78.25	103.158
G7	a58	904.3	24.9	918	41.3	950.9	126.1	Gutiérrez-Alonso et al., 2015	Stephan et al., 2018	904.3	12.45	95.0994		643.1	8.3	103.16
G7	a58	1117.6	30.2	1122.5	34.2	1132	81.3	Gutiérrez-Alonso et al., 2015	Stephan et al., 2018	1132	40.65	98.7279		2389	11.75	103.278
G7	a59	708.1	19.5	711.2	17.2	721.3	36.1	Gutiérrez-Alonso et al., 2015	Stephan et al., 2018	708.1	9.75	98.17		687.8	9.95	103.835
G7	a59	2762.1	63.8	2699.5	28	2652.9	14.2	Gutiérrez-Alonso et al., 2015	Stephan et al., 2018	2652.9	7.1	104.116		1071.3	67.7	103.864
G7	a60	916.6	25	938.3	24.1	989.6	53.5	Gutiérrez-Alonso et al., 2015	Stephan et al., 2018	916.6	12.5	92.6233		1041.4	21.2	103.927
G7	a60	2467.3	118.7	2424.6	54.9	2389	23.5	Gutiérrez-Alonso et al., 2015	Stephan et al., 2018	2389	11.75	103.278		2652.9	7.1	104.116
G7	a61	1119.2	30.5	1160.2	37.1	1237.7	87.8	Gutiérrez-Alonso et al., 2015	Stephan et al., 2018	1237.7	43.9	90.4258		2109.7	8.9	104.422
G7	a61	1091	29.8	1062.1	80.4	1003.2	240.2	Gutiérrez-Alonso et al., 2015	Stephan et al., 2018	1003.2	120.1	108.752		1021.7	20.9	105.021
G7	a62	856.5	24.9	867.3	44.9	894.8	145.5	Gutiérrez-Alonso et al., 2015	Stephan et al., 2018	856.5	12.45	95.7197		996	28.35	105.151
G7	a62	724.2	18.8	725.3	28.5	728.4	101	Gutiérrez-Alonso et al., 2015	Stephan et al., 2018	724.2	9.4	99.4234		1909.8	22.8	105.597
G7	a64	1067	27.3	1086	22.3	1124.4	37	Gutiérrez-Alonso et al., 2015	Stephan et al., 2018	1124.4	18.5	94.8951		1309	100.05	106.295
G7	a64	1089.3	27.9	1088.9	22.7	1088.1	39.3	Gutiérrez-Alonso et al., 2015	Stephan et al., 2018	1088.1	19.65	100.11		1929.8	22.15	106.306
G7	a65	1040.7	27.2	1044.1	32.6	1051.3	82.8	Gutiérrez-Alonso et al., 2015	Stephan et al., 2018	1051.3	41.4	98.9917		677.4	8.7	106.509
G7	a65	1032.5	27.7	1024.8	20.6	1008.3	27	Gutiérrez-Alonso et al., 2015	Stephan et al., 2018	1008.3	13.5	102.4		676.8	8.4	107.943
G7	a66	2667.3	60.1	2634.4	27.5	2609.2	16.7	Gutiérrez-Alonso et al., 2015	Stephan et al., 2018	2609.2	8.35	102.227		1948.8	20.35	108.143
G7	a7	748.4	19.4	744.6	16.4	733.3	30.4	Gutiérrez-Alonso et al., 2015	Stephan et al., 2018	748.4	9.7	102.059		2610.2	7.25	108.666
G7	a7	677.4	17.4	667.9	17.5	636	50.1	Gutiérrez-Alonso et al., 2015	Stephan et al., 2018	677.4	8.7	106.509		1003.2	120.1	108.752
G7	a8	546.7	14.2	553.3	12.7	580.8	27.5	Gutiérrez-Alonso et al., 2015	Stephan et al., 2018	546.7	7.1	94.1288		2636	5.95	108.858
G7	a8	595.6	17.5	600.2	47.6	617.5	216.9	Gutiérrez-Alonso et al., 2015	Stephan et al., 2018	595.6	8.75	96.4534		1971.2	18.75	109.03
G7	a9	643.1	16.6	638.7	18.9	623.4	62.9	Gutiérrez-Alonso et al., 2015	Stephan et al., 2018	643.1	8.3	103.16		2153.6	27	109.296
G7	a9	1082.3	27.8	1068.8	23.1	1041.4	42.4	Gutiérrez-Alonso et al., 2015	Stephan et al., 2018	1041.4	21.2	103.927		1029	63.65	109.553
														OR1	Ediacaran
OR1	a10	574.6	19.8	576.1	18.5	580.8	45.7	Linnemann et al., 2017	Stephan et al., 2018	574.6	9.9	98.9325		926.1	20.25	95.4742
OR1	a11	575.4	16	576.4	18.9	579.3	67.4	Linnemann et al., 2017	Stephan et al., 2018	575.4	8	99.3268		617.8	15	96.849
OR1	a13	559.7	16.6	561.2	20.7	566.5	80.6	Linnemann et al., 2017	Stephan et al., 2018	559.7	8.3	98.7996		864.4	7.3	96.9602
OR1	a15	2474.9	55.5	2482.5	26	2488	15.5	Linnemann et al., 2017	Stephan et al., 2018	2488	7.75	99.4735		612.3	6.7	97.5
OR1	a16	562	16.1	562.9	16	565.7	47.9	Linnemann et al., 2017	Stephan et al., 2018	562	8.05	99.3459		629	7.2	97.7923
OR1	a17	560.9	12.9	561.2	16.8	561.7	67.6	Linnemann et al., 2017	Stephan et al., 2018	560.9	6.45	99.8576		672.3	11.5	97.8745
OR1	a18	829	23.3	830.2	25.5	832.2	68.8	Linnemann et al., 2017	Stephan et al., 2018	829	11.65	99.6155		665	10.1	97.9381
OR1	a19	1802.1	61.3	1818.2	41.5	1836	54.4	Linnemann et al., 2017	Stephan et al., 2018	1836	27.2	98.1536		854.9	9.2	97.9828
OR1	a20	2057.5	42.3	2052.9	27.3	2047.4	33.7	Linnemann et al., 2017	Stephan et al., 2018	2047.4	16.85	100.493		697.4	8.25	98.0872
OR1	a21	2016.2	50.2	2013.5	28.1	2009.8	23.2	Linnemann et al., 2017	Stephan et al., 2018	2009.8	11.6	100.318		706.3	10.7	98.1381
OR1	a22	566.6	14.6	567.3	12.6	569.1	24	Linnemann et al., 2017	Stephan et al., 2018	566.6	7.3	99.5607		1836	27.2	98.1536
OR1	a23	640.3	15.9	640.6	20	641.1	73.1	Linnemann et al., 2017	Stephan et al., 2018	640.3	7.95	99.8752		633.2	6.95	98.1705
OR1	a24	636.4	20.6	636	24.6	633.7	84	Linnemann et al., 2017	Stephan et al., 2018	636.4	10.3	100.426		564.8	5.4	98.2432
OR1	a25	844.5	24.5	844.6	33.8	844	106.1	Linnemann et al., 2017	Stephan et al., 2018	844.5	12.25	100.059		829.5	6.6	98.3519
OR1	a26	732.9	17.3	735.1	27.2	740.7	97.3	Linnemann et al., 2017	Stephan et al., 2018	732.9	8.65	98.9469		710.4	10.1	98.4752
OR1	a27	730.7	18	731.9	16.7	734.7	40.3	Linnemann et al., 2017	Stephan et al., 2018	730.7	9	99.4556		642.4	10.7	98.6941
OR1	a28	621.1	14.8	621.1	21.4	620.2	82	Linnemann et al., 2017	Stephan et al., 2018	621.1	7.4	100.145		566.5	5.95	98.7278
OR1	a29	870	22.8	872.4	25.2	877.3	66.3	Linnemann et al., 2017	Stephan et al., 2018	870	11.4	99.1679		2098	8.9	98.756
OR1	a30	710.4	20.2	713.3	20.5	721.4	57.3	Linnemann et al., 2017	Stephan et al., 2018	710.4	10.1	98.4752		620.3	6.8	98.7739
OR1	a31	685.8	18.9	686.1	22.9	686.2	74.7	Linnemann et al., 2017	Stephan et al., 2018	685.8	9.45	99.9417		559.7	8.3	98.7996
OR1	a32	565.5	13.5	566	20	566.9	84.9	Linnemann et al., 2017	Stephan et al., 2018	565.5	6.75	99.753		648.7	9.55	98.8119
OR1	a33	589.7	19.2	591.3	17.5	596.1	41.2	Linnemann et al., 2017	Stephan et al., 2018	589.7	9.6	98.9264		925.2	18.55	98.9201
OR1	a5	2071.9	56.7	2085.4	30.1	2098	17.8	Linnemann et al., 2017	Stephan et al., 2018	2098	8.9	98.756		589.7	9.6	98.9264
OR1	a6	706.3	21.4	709.7	35.2	719.7	129.5	Linnemann et al., 2017	Stephan et al., 2018	706.3	10.7	98.1381		574.6	9.9	98.9325
OR1	a8	580.3	18.3	581.1	20.4	583.7	67.3	Linnemann et al., 2017	Stephan et al., 2018	580.3	9.15	99.4175		732.9	8.65	98.9469
OR1	a9	639.7	15.8	640.7	24.7	643.2	96.8	Linnemann et al., 2017	Stephan et al., 2018	639.7	7.9	99.4558		704.3	15.7	99.0159
OR1	b1	918.6	21.4	921.3	27.9	926.8	80.1	Linnemann et al., 2017	Stephan et al., 2018	918.6	10.7	99.1152		744.4	8.8	99.0948
OR1	b10	854.9	18.4	860.1	19.2	872.5	49.8	Linnemann et al., 2017	Stephan et al., 2018	854.9	9.2	97.9828		918.6	10.7	99.1152
OR1	b11	633.2	13.9	636	13.2	645	36.6	Linnemann et al., 2017	Stephan et al., 2018	633.2	6.95	98.1705		1922.8	18.85	99.1263
OR1	b14	926.1	40.5	939.4	31.3	970	40.9	Linnemann et al., 2017	Stephan et al., 2018	926.1	20.25	95.4742		870	11.4	99.1679
OR1	b15	2499	64.2	2504.1	30.7	2507.5	23.8	Linnemann et al., 2017	Stephan et al., 2018	2507.5	11.9	99.661		589.4	22.8	99.1755
OR1	b16	617.8	30	622.3	25.6	637.9	43.1	Linnemann et al., 2017	Stephan et al., 2018	617.8	15	96.849		595.5	4.85	99.1839
OR1	b18	1906	51.2	1914.5	31.9	1922.8	37.7	Linnemann et al., 2017	Stephan et al., 2018	1922.8	18.85	99.1263		692.3	13.15	99.2545
OR1	b19	614.8	18.8	614.5	18	612.3	47.6	Linnemann et al., 2017	Stephan et al., 2018	614.8	9.4	100.408		614.1	13.2	99.2565
OR1	b2	620.3	13.6	622.2	21.9	628	88.4	Linnemann et al., 2017	Stephan et al., 2018	620.3	6.8	98.7739		683.2	8.1	99.259
OR1	b20	589.4	45.6	590.6	38.1	594.3	56.4	Linnemann et al., 2017	Stephan et al., 2018	589.4	22.8	99.1755		2660.1	19.95	99.3008
OR1	b21	2641.5	75.9	2652.5	39.6	2660.1	39.9	Linnemann et al., 2017	Stephan et al., 2018	2660.1	19.95	99.3008		575.4	8	99.3268
OR1	b22	597.3	16.5	598.1	18.1	599.7	60.7	Linnemann et al., 2017	Stephan et al., 2018	597.3	8.25	99.5998		562	8.05	99.3459
OR1	b23	672.3	23	675.9	20.7	686.9	44.9	Linnemann et al., 2017	Stephan et al., 2018	672.3	11.5	97.8745		633.9	6.05	99.3729
OR1	b24	614.1	26.4	615.3	33.7	618.7	125.2	Linnemann et al., 2017	Stephan et al., 2018	614.1	13.2	99.2565		567.5	4.9	99.4044
OR1	b27	642.4	21.4	644.5	32.5	650.9	124.5	Linnemann et al., 2017	Stephan et al., 2018	642.4	10.7	98.6941		580.3	9.15	99.4175
OR1	b28	665	20.2	668.3	23	679	74.8	Linnemann et al., 2017	Stephan et al., 2018	665	10.1	97.9381		730.7	9	99.4556
OR1	b29	692.3	26.3	693.7	25.6	697.5	66.1	Linnemann et al., 2017	Stephan et al., 2018	692.3	13.15	99.2545		639.7	7.9	99.4558
OR1	b30	925.2	37.1	928.4	29.2	935.3	47.2	Linnemann et al., 2017	Stephan et al., 2018	925.2	18.55	98.9201		2488	7.75	99.4735
OR1	b31	675	21.8	674.6	21.7	672.8	59.9	Linnemann et al., 2017	Stephan et al., 2018	675	10.9	100.327		600.3	5.45	99.5522
OR1	b32	634.6	17.5	634.3	27.8	632.3	112	Linnemann et al., 2017	Stephan et al., 2018	634.6	8.75	100.364		2668.3	17.45	99.554
OR1	b33	2068.4	76.1	2066.1	39.7	2063	24.9	Linnemann et al., 2017	Stephan et al., 2018	2063	12.45	100.262		566.6	7.3	99.5607
OR1	b4	825.6	18.6	825.4	17	824	39.7	Linnemann et al., 2017	Stephan et al., 2018	825.6	9.3	100.194		840.2	7.1	99.5852
OR1	b6	619.7	13	619.1	15.8	616.2	54	Linnemann et al., 2017	Stephan et al., 2018	619.7	6.5	100.568		570.8	6.55	99.5987
OR1	b7	612.3	13.4	615.9	13.9	628	41	Linnemann et al., 2017	Stephan et al., 2018	612.3	6.7	97.5		597.3	8.25	99.5998
OR1	b9	629	14.4	632.4	17	643.2	58.1	Linnemann et al., 2017	Stephan et al., 2018	629	7.2	97.7923		829	11.65	99.6155
OR1	c1	1494.2	37.4	1496.1	29.8	1498	47.3	Linnemann et al., 2017	Stephan et al., 2018	1498	23.65	99.7463		2507.5	11.9	99.661
OR1	c10	704.3	31.4	706.2	32.6	711.3	93.5	Linnemann et al., 2017	Stephan et al., 2018	704.3	15.7	99.0159		882.7	11.15	99.6838
OR1	c11	683.2	16.2	684.6	33.9	688.3	134.4	Linnemann et al., 2017	Stephan et al., 2018	683.2	8.1	99.259		1498	23.65	99.7463
OR1	c12	600.3	10.9	601	15.4	603	60.6	Linnemann et al., 2017	Stephan et al., 2018	600.3	5.45	99.5522		565.5	6.75	99.753
OR1	c14	882.7	22.3	883.7	52.5	885.5	175.7	Linnemann et al., 2017	Stephan et al., 2018	882.7	11.15	99.6838		831.7	8.2	99.7601
OR1	c15	2656.4	58.8	2663.5	33	2668.3	34.9	Linnemann et al., 2017	Stephan et al., 2018	2668.3	17.45	99.554		560.9	6.45	99.8576
OR1	c16	744.4	17.6	746.3	37.5	751.2	139.4	Linnemann et al., 2017	Stephan et al., 2018	744.4	8.8	99.0948		640.3	7.95	99.8752
OR1	c18	595.5	9.7	596.7	12.2	600.4	45.5	Linnemann et al., 2017	Stephan et al., 2018	595.5	4.85	99.1839		561.9	9.95	99.9111
OR1	c19	864.4	14.6	872.3	40.4	891.5	138.4	Linnemann et al., 2017	Stephan et al., 2018	864.4	7.3	96.9602		685.8	9.45	99.9417
OR1	c2	561.9	19.9	562.1	21.6	562.4	71.9	Linnemann et al., 2017	Stephan et al., 2018	561.9	9.95	99.9111		844.5	12.25	100.059
OR1	c20	840.2	14.2	841.4	14.3	843.7	35.4	Linnemann et al., 2017	Stephan et al., 2018	840.2	7.1	99.5852		1001.9	24.4	100.08
OR1	c22	627.3	11.4	627.2	16.9	625.9	66.9	Linnemann et al., 2017	Stephan et al., 2018	627.3	5.7	100.224		621.1	7.4	100.145
OR1	c23	570.8	13.1	571.5	13.6	573.1	43.5	Linnemann et al., 2017	Stephan et al., 2018	570.8	6.55	99.5987		825.6	9.3	100.194
OR1	c24	2472.1	39	2469.7	19.5	2467	13.9	Linnemann et al., 2017	Stephan et al., 2018	2467	6.95	100.207		2467	6.95	100.207
OR1	c25	831.7	16.4	832.5	36.4	833.7	125.1	Linnemann et al., 2017	Stephan et al., 2018	831.7	8.2	99.7601		627.3	5.7	100.224
OR1	c26	697.4	16.5	700.9	26.3	711	95.7	Linnemann et al., 2017	Stephan et al., 2018	697.4	8.25	98.0872		2063	12.45	100.262
OR1	c28	564.8	10.8	567	17.4	574.9	74	Linnemann et al., 2017	Stephan et al., 2018	564.8	5.4	98.2432		2009.8	11.6	100.318
OR1	c29	829.5	13.2	833.5	20.5	843.4	66.6	Linnemann et al., 2017	Stephan et al., 2018	829.5	6.6	98.3519		675	10.9	100.327
OR1	c3	648.7	19.1	650.7	25.5	656.5	90.1	Linnemann et al., 2017	Stephan et al., 2018	648.7	9.55	98.8119		634.6	8.75	100.364
OR1	c30	567.5	9.8	568.4	19.2	570.9	89.2	Linnemann et al., 2017	Stephan et al., 2018	567.5	4.9	99.4044		614.8	9.4	100.408
OR1	c32	1002.7	18.6	1002.7	19.8	1001.9	48.8	Linnemann et al., 2017	Stephan et al., 2018	1001.9	24.4	100.08		636.4	10.3	100.426
OR1	c6	633.9	12.1	635	16.1	637.9	60.3	Linnemann et al., 2017	Stephan et al., 2018	633.9	6.05	99.3729		2047.4	16.85	100.493
OR1	c7	566.5	11.9	568.1	22.2	573.8	100.1	Linnemann et al., 2017	Stephan et al., 2018	566.5	5.95	98.7278		619.7	6.5	100.568
														QAM 1	Lower Ordovician
QAM 1	mr14d06	537.2	4.2	548.3	6.5	591.7	35.2	Linnemann et al., 2008	Stephan et al., 2018	537.2	2.1	90.7893		2026.6	13.2	88.4338
QAM 1	mr14d08	536	5.4	543	6.2	569.8	29.7	Linnemann et al., 2008	Stephan et al., 2018	536	2.7	94.0681		525.9	2	89.4236
QAM 1	mr14d09	525.9	4	538.1	6	588.1	33.9	Linnemann et al., 2008	Stephan et al., 2018	525.9	2	89.4236		614.4	6.25	89.4453
QAM 1	mr14d10	2444	33.8	2533.9	14.8	2605.3	11.4	Linnemann et al., 2008	Stephan et al., 2018	2605.3	5.7	93.8088		537.8	3.55	89.783
QAM 1	mr14d12	537.8	7.1	549.9	9.9	599	54.6	Linnemann et al., 2008	Stephan et al., 2018	537.8	3.55	89.783		537.2	2.1	90.7893
QAM 1	mr14d14	524.7	7.8	530.7	9.7	555	59.4	Linnemann et al., 2008	Stephan et al., 2018	524.7	3.9	94.5405		1863.3	10.4	91.3272
QAM 1	mr14d15	526.5	5.1	535.3	6.7	573.5	42.7	Linnemann et al., 2008	Stephan et al., 2018	526.5	2.55	91.8047		892.5	5.15	91.3978
QAM 1	mr14e05	524.7	7.1	533.6	12	569.8	52.7	Linnemann et al., 2008	Stephan et al., 2018	524.7	3.55	92.0849		526.5	2.55	91.8047
QAM 1	mr14e06	531.8	6.7	539.7	9.7	573.5	54.4	Linnemann et al., 2008	Stephan et al., 2018	531.8	3.35	92.7289		587.4	3.45	92.0257
QAM 1	mr14e07	558.5	11.1	557.6	19.8	551.3	89.5	Linnemann et al., 2008	Stephan et al., 2018	558.5	5.55	101.306		524.7	3.55	92.0849
QAM 1	mr14e08	527.1	7.3	530.1	9.8	540.1	59.5	Linnemann et al., 2008	Stephan et al., 2018	527.1	3.65	97.593		523.5	4.7	92.4748
QAM 1	mr14e10	1701.7	18	1775.7	15	1863.3	20.8	Linnemann et al., 2008	Stephan et al., 2018	1863.3	10.4	91.3272		548.4	6.7	92.6821
QAM 1	mr14e12	1723.5	29.4	1759.9	26.3	1801.9	71	Linnemann et al., 2008	Stephan et al., 2018	1801.9	35.5	95.649		531.8	3.35	92.7289
QAM 1	mr14e13	521.7	6.9	521.3	10.8	517.4	66.3	Linnemann et al., 2008	Stephan et al., 2018	521.7	3.45	100.831		532.4	3.6	92.8335
QAM 1	mr14e14	1902	15.5	1951.1	12.2	2002.3	25	Linnemann et al., 2008	Stephan et al., 2018	2002.3	12.5	94.9908		544.3	6.75	93.1223
QAM 1	mr14e15	587.4	6.9	598	18.9	638.3	89.1	Linnemann et al., 2008	Stephan et al., 2018	587.4	3.45	92.0257		2605.3	5.7	93.8088
QAM 1	mr14f05	532.4	7.2	540.5	6.8	573.5	27.5	Linnemann et al., 2008	Stephan et al., 2018	532.4	3.6	92.8335		536	2.7	94.0681
QAM 1	mr14f07	542.5	4.6	541.2	9.4	532.6	49.5	Linnemann et al., 2008	Stephan et al., 2018	542.5	2.3	101.859		550.2	2.5	94.1317
QAM 1	mr14f13	544.9	6.9	549.8	9.3	569.8	55.3	Linnemann et al., 2008	Stephan et al., 2018	544.9	3.45	95.63		544.3	2.3	94.3001
QAM 1	mr14f14	543.7	9.5	541.6	12.8	532.6	61.8	Linnemann et al., 2008	Stephan et al., 2018	543.7	4.75	102.084		2774.8	8.7	94.3383
QAM 1	mr14f15	2617.7	16	2707.8	9.8	2774.8	17.4	Linnemann et al., 2008	Stephan et al., 2018	2774.8	8.7	94.3383		524.7	3.9	94.5405
QAM 1	mr14f16	523.5	9.4	531.9	11.9	566.1	54.5	Linnemann et al., 2008	Stephan et al., 2018	523.5	4.7	92.4748		1916.2	6.25	94.5726
QAM 1	mr15b05	1792.2	28.8	1903.9	19.8	2026.6	26.4	Linnemann et al., 2008	Stephan et al., 2018	2026.6	13.2	88.4338		2002.3	12.5	94.9908
QAM 1	mr15b06	548.4	13.4	557	20.6	591.7	112.8	Linnemann et al., 2008	Stephan et al., 2018	548.4	6.7	92.6821		544.9	3.45	95.63
QAM 1	mr15b07	544.3	4.6	550.9	7.2	577.2	36.6	Linnemann et al., 2008	Stephan et al., 2018	544.3	2.3	94.3001		555.5	2.95	95.6439
QAM 1	mr15b09	1812.2	8.9	1861.7	7.1	1916.2	12.5	Linnemann et al., 2008	Stephan et al., 2018	1916.2	6.25	94.5726		1801.9	35.5	95.649
QAM 1	mr15b14	892.5	10.3	917.9	9.3	976.5	25	Linnemann et al., 2008	Stephan et al., 2018	892.5	5.15	91.3978		904.3	5.4	96.5926
QAM 1	mr15b15	904.3	10.8	914	12.2	936.2	42.3	Linnemann et al., 2008	Stephan et al., 2018	904.3	5.4	96.5926		527.1	3.65	97.593
QAM 1	mr15b16	614.4	12.5	630.5	12.3	686.9	48.7	Linnemann et al., 2008	Stephan et al., 2018	614.4	6.25	89.4453		521.7	3.45	100.831
QAM 1	mr15c05	544.3	13.5	551.8	14.2	584.5	40	Linnemann et al., 2008	Stephan et al., 2018	544.3	6.75	93.1223		558.5	5.55	101.306
QAM 1	mr15c13	556.1	4.7	553.4	6.7	543.8	35	Linnemann et al., 2008	Stephan et al., 2018	556.1	2.35	102.262		570.3	2.7	101.405
QAM 1	mr15c14	550.2	5	557.2	8.2	584.5	32.2	Linnemann et al., 2008	Stephan et al., 2018	550.2	2.5	94.1317		542.5	2.3	101.859
QAM 1	mr15c15	570.3	5.4	569.2	7.2	562.4	31.4	Linnemann et al., 2008	Stephan et al., 2018	570.3	2.7	101.405		543.7	4.75	102.084
QAM 1	mr15c16	555.5	5.9	560.8	4.8	580.8	29.6	Linnemann et al., 2008	Stephan et al., 2018	555.5	2.95	95.6439		556.1	2.35	102.262
														PO-1	Upper Ordovician
PO-1	PO1-0	517.6	11.3	501.3	20.6	419.3	193.1	Martínez-Catalán et al., 2004	Stephan et al., 2018	517.6	5.65	123.444		803.3	8.55	81.0841
PO-1	PO1-1	592.1	11.2	585.1	20.7	547.6	164	Martínez-Catalán et al., 2004	Stephan et al., 2018	592.1	5.6	108.126		612.7	7.05	89.1978
PO-1	PO1-1	537.2	11.9	520.5	19.3	435.4	184.9	Martínez-Catalán et al., 2004	Stephan et al., 2018	537.2	5.95	123.381		941.8	10.6	90.5055
PO-1	PO1-10	653.6	16.3	665.7	39	577.2	139.2	Martínez-Catalán et al., 2004	Stephan et al., 2018	653.6	8.15	113.236		707.5	8.65	91.1022
PO-1	PO1-11	671	15.1	665.9	15.8	648.8	142.1	Martínez-Catalán et al., 2004	Stephan et al., 2018	671	7.55	103.422		586.2	7.95	92.3586
PO-1	PO1-12	683.8	13.9	673.9	21.6	631.2	139	Martínez-Catalán et al., 2004	Stephan et al., 2018	683.8	6.95	108.333		1987.8	19.1	94.6775
PO-1	PO1-13	693.6	15.6	698	18.5	710.6	135.7	Martínez-Catalán et al., 2004	Stephan et al., 2018	693.6	7.8	97.6077		986.2	11.9	95.2758
PO-1	PO1-14	707.5	17.3	724.2	21.3	776.6	131.6	Martínez-Catalán et al., 2004	Stephan et al., 2018	707.5	8.65	91.1022		2611	12.85	95.7334
PO-1	PO1-15	715.6	13.9	719.3	12.4	730.7	131	Martínez-Catalán et al., 2004	Stephan et al., 2018	715.6	6.95	97.9335		2690.3	12.3	95.8146
PO-1	PO1-16	780.4	16	786.9	15	802.3	117.9	Martínez-Catalán et al., 2004	Stephan et al., 2018	780.4	8	97.2703		2074	17.7	95.9306
PO-1	PO1-17	790.7	16	790.6	19.4	773.4	116.1	Martínez-Catalán et al., 2004	Stephan et al., 2018	790.7	8	102.237		2086.3	17.4	96.803
PO-1	PO1-18	829.9	19.3	829	35.1	821.2	110	Martínez-Catalán et al., 2004	Stephan et al., 2018	829.9	9.65	101.059		780.4	8	97.2703
PO-1	PO1-19	912.2	18.5	911.7	15.2	906.8	98.2	Martínez-Catalán et al., 2004	Stephan et al., 2018	912.2	9.25	100.596		2186.3	16.2	97.3471
PO-1	PO1-2	563.8	14.2	552.8	38.9	471.1	172.8	Martínez-Catalán et al., 2004	Stephan et al., 2018	563.8	7.1	119.677		693.6	7.8	97.6077
PO-1	PO1-20	930.6	20.7	935.4	19.5	950.7	95.8	Martínez-Catalán et al., 2004	Stephan et al., 2018	930.6	10.35	97.8858		2006.6	18.15	97.7076
PO-1	PO1-21	961.8	19.4	964.4	26.5	956.5	91.6	Martínez-Catalán et al., 2004	Stephan et al., 2018	961.8	9.7	100.554		930.6	10.35	97.8858
PO-1	PO1-22	979	32.1	961.7	76.2	897.8	90.2	Martínez-Catalán et al., 2004	Stephan et al., 2018	979	16.05	109.044		715.6	6.95	97.9335
PO-1	PO1-23	986.2	23.8	1002	26.8	1035.1	88.6	Martínez-Catalán et al., 2004	Stephan et al., 2018	986.2	11.9	95.2758		2117.3	16.8	98.0825
PO-1	PO1-24	803.3	17.1	855.3	18.8	990.7	111.1	Martínez-Catalán et al., 2004	Stephan et al., 2018	803.3	8.55	81.0841		1905.5	19.25	98.8192
PO-1	PO1-25	1003.3	20.4	1000.2	25.5	976.5	87.1	Martínez-Catalán et al., 2004	Stephan et al., 2018	976.5	43.55	102.744		1937.4	18.65	99.458
PO-1	PO1-26	941.8	21.2	971.8	25.4	1040.6	93.1	Martínez-Catalán et al., 2004	Stephan et al., 2018	941.8	10.6	90.5055		1891.6	19.2	99.926
PO-1	PO1-27	1890.2	33.7	1891.7	17.5	1891.6	38.4	Martínez-Catalán et al., 2004	Stephan et al., 2018	1891.6	19.2	99.926		961.8	9.7	100.554
PO-1	PO1-28	1883	34.7	1894.2	18.1	1905.5	38.5	Martínez-Catalán et al., 2004	Stephan et al., 2018	1905.5	19.25	98.8192		912.2	9.25	100.596
PO-1	PO1-29	1926.9	35.4	1932.5	18.4	1937.4	37.3	Martínez-Catalán et al., 2004	Stephan et al., 2018	1937.4	18.65	99.458		829.9	9.65	101.059
PO-1	PO1-3	586.2	15.9	600.8	36.9	634.7	162.5	Martínez-Catalán et al., 2004	Stephan et al., 2018	586.2	7.95	92.3586		790.7	8	102.237
PO-1	PO1-30	1882	32.8	1932.9	16.9	1987.8	38.2	Martínez-Catalán et al., 2004	Stephan et al., 2018	1987.8	19.1	94.6775		976.5	43.55	102.744
PO-1	PO1-31	1960.6	36.2	1983.6	19.9	2006.6	36.3	Martínez-Catalán et al., 2004	Stephan et al., 2018	2006.6	18.15	97.7076		671	7.55	103.422
PO-1	PO1-32	1989.6	38.8	2031.8	21.1	2074	35.4	Martínez-Catalán et al., 2004	Stephan et al., 2018	2074	17.7	95.9306		617.9	6.45	103.779
PO-1	PO1-33	2019.6	37.2	2053.8	19.7	2086.3	34.8	Martínez-Catalán et al., 2004	Stephan et al., 2018	2086.3	17.4	96.803		592.1	5.6	108.126
PO-1	PO1-34	2076.7	41.1	2097.1	22	2117.3	33.6	Martínez-Catalán et al., 2004	Stephan et al., 2018	2117.3	16.8	98.0825		683.8	6.95	108.333
PO-1	PO1-35	2128.3	34.3	2158.2	16.5	2186.3	32.4	Martínez-Catalán et al., 2004	Stephan et al., 2018	2186.3	16.2	97.3471		979	16.05	109.044
PO-1	PO1-36	2499.6	42.9	2562.1	18.4	2611	25.7	Martínez-Catalán et al., 2004	Stephan et al., 2018	2611	12.85	95.7334		632.6	6.7	112.482
PO-1	PO1-37	2577.7	48.4	2641	21.5	2690.3	24.6	Martínez-Catalán et al., 2004	Stephan et al., 2018	2690.3	12.3	95.8146		653.6	8.15	113.236
PO-1	PO1-4	595	14.7	574.6	31.8	463.2	163.9	Martínez-Catalán et al., 2004	Stephan et al., 2018	595	7.35	128.454		563.8	7.1	119.677
PO-1	PO1-5	608	13.5	586.7	23	498.3	161.1	Martínez-Catalán et al., 2004	Stephan et al., 2018	608	6.75	122.015		608	6.75	122.015
PO-1	PO1-6	612.7	14.1	629.2	18.1	686.9	155.2	Martínez-Catalán et al., 2004	Stephan et al., 2018	612.7	7.05	89.1978		537.2	5.95	123.381
PO-1	PO1-7	617.9	12.9	613.4	12.9	595.4	156.2	Martínez-Catalán et al., 2004	Stephan et al., 2018	617.9	6.45	103.779		517.6	5.65	123.444
PO-1	PO1-8	621.4	13.5	599.6	27.6	486.7	156	Martínez-Catalán et al., 2004	Stephan et al., 2018	621.4	6.75	127.676		621.4	6.75	127.676
PO-1	PO1-9	632.6	13.4	620.5	26.6	562.4	152.4	Martínez-Catalán et al., 2004	Stephan et al., 2018	632.6	6.7	112.482		595	7.35	128.454
														PO-2	Silurian
PO-2	PO2-1	499.7	11.9	500.8	32.7	486.7	197	Martínez-Catalán et al., 2004	Stephan et al., 2018	499.7	5.95	102.671		757.6	9.45	82.4733
PO-2	PO2-10	917.2	20.7	942.7	37	982.2	95.7	Martínez-Catalán et al., 2004	Stephan et al., 2018	917.2	10.35	93.3822		2531.1	15.55	84.6746
PO-2	PO2-11	757.6	18.9	800.1	23.8	918.6	119.6	Martínez-Catalán et al., 2004	Stephan et al., 2018	757.6	9.45	82.4733		2120	19.05	87.8208
PO-2	PO2-12	935.1	15.6	903.3	26.2	799.1	96.2	Martínez-Catalán et al., 2004	Stephan et al., 2018	935.1	7.8	117.019		2450.7	15.25	89.3949
PO-2	PO2-13	976.8	20.5	949.9	35.9	852.3	90.6	Martínez-Catalán et al., 2004	Stephan et al., 2018	976.8	10.25	114.608		932.3	8.35	90.3041
PO-2	PO2-14	896.5	16.8	921.1	14.3	979.4	99	Martínez-Catalán et al., 2004	Stephan et al., 2018	896.5	8.4	91.5356		1908.5	21.2	90.6995
PO-2	PO2-15	990.6	18.8	1046.6	35.8	1024.1	82.4	Martínez-Catalán et al., 2004	Stephan et al., 2018	990.6	9.4	96.7288		974	9.7	90.782
PO-2	PO2-16	989.5	18.8	994.4	15.7	1004.7	88.8	Martínez-Catalán et al., 2004	Stephan et al., 2018	989.5	9.4	98.4871		2625.2	13.5	91.1207
PO-2	PO2-17	996.7	25.4	964.5	54.2	867.6	88.9	Martínez-Catalán et al., 2004	Stephan et al., 2018	996.7	12.7	114.88		896.5	8.4	91.5356
PO-2	PO2-18	1002.7	21	978.7	32.7	912.7	88.2	Martínez-Catalán et al., 2004	Stephan et al., 2018	912.7	44.1	109.861		918.3	8.1	91.6559
PO-2	PO2-19	918.3	16.2	943.7	13.7	1001.9	96.2	Martínez-Catalán et al., 2004	Stephan et al., 2018	918.3	8.1	91.6559		917.2	10.35	93.3822
PO-2	PO2-2	579.2	11.8	577.6	13.1	573.5	168	Martínez-Catalán et al., 2004	Stephan et al., 2018	579.2	5.9	100.994		1796.9	22	94.2902
PO-2	PO2-20	1030.3	20.9	1037.3	21.9	1051.4	84.4	Martínez-Catalán et al., 2004	Stephan et al., 2018	1051.4	42.2	97.9932		2620.4	12.85	95.3251
PO-2	PO2-21	932.3	16.7	962.6	12.7	1032.4	94.3	Martínez-Catalán et al., 2004	Stephan et al., 2018	932.3	8.35	90.3041		1993.6	18.8	95.5257
PO-2	PO2-22	1051.7	20.8	1061.2	17.8	1080.9	82.2	Martínez-Catalán et al., 2004	Stephan et al., 2018	1080.9	41.1	97.2985		2641	12.6	96.1
PO-2	PO2-23	974	19.4	1004.9	16.1	1072.9	89.4	Martínez-Catalán et al., 2004	Stephan et al., 2018	974	9.7	90.782		990.6	9.4	96.7288
PO-2	PO2-24	1099	19	1103.8	14.3	1112.5	77.9	Martínez-Catalán et al., 2004	Stephan et al., 2018	1112.5	38.95	98.7865		680.9	6.65	97.202
PO-2	PO2-25	1694.3	29.8	1740.9	16.9	1796.9	44	Martínez-Catalán et al., 2004	Stephan et al., 2018	1796.9	22	94.2902		1080.9	41.1	97.2985
PO-2	PO2-26	1892.2	29.3	1894.1	15.9	1896.2	38.3	Martínez-Catalán et al., 2004	Stephan et al., 2018	1896.2	19.15	99.7891		2671.3	12.15	97.6903
PO-2	PO2-27	1913.4	31.6	1910.9	16.2	1907	37.8	Martínez-Catalán et al., 2004	Stephan et al., 2018	1907	18.9	100.336		1051.4	42.2	97.9932
PO-2	PO2-28	1731	35	1813.6	21.6	1908.5	42.4	Martínez-Catalán et al., 2004	Stephan et al., 2018	1908.5	21.2	90.6995		603.9	7.95	98.4513
PO-2	PO2-29	2000.6	35.5	1984.3	18.2	1967.3	35.7	Martínez-Catalán et al., 2004	Stephan et al., 2018	1967.3	17.85	101.693		989.5	9.4	98.4871
PO-2	PO2-3	603.9	15.9	606.1	28.3	613.4	159.6	Martínez-Catalán et al., 2004	Stephan et al., 2018	603.9	7.95	98.4513		1112.5	38.95	98.7865
PO-2	PO2-30	1904.4	31.7	1947.7	17.9	1993.6	37.6	Martínez-Catalán et al., 2004	Stephan et al., 2018	1993.6	18.8	95.5257		660.5	7.55	99.1444
PO-2	PO2-31	1861.8	31.4	1987.4	17.2	2120	38.1	Martínez-Catalán et al., 2004	Stephan et al., 2018	2120	19.05	87.8208		2733.6	11.5	99.5427
PO-2	PO2-32	2175.5	36.4	2179.2	17.5	2181.2	31.6	Martínez-Catalán et al., 2004	Stephan et al., 2018	2181.2	15.8	99.7387		2181.2	15.8	99.7387
PO-2	PO2-33	2458.4	39.6	2446.4	17.7	2435.8	26.6	Martínez-Catalán et al., 2004	Stephan et al., 2018	2435.8	13.3	100.928		1896.2	19.15	99.7891
PO-2	PO2-34	2190.8	37.6	2328.3	19.1	2450.7	30.5	Martínez-Catalán et al., 2004	Stephan et al., 2018	2450.7	15.25	89.3949		672.2	8.4	99.8663
PO-2	PO2-35	2143.2	40.2	2347.3	22.4	2531.1	31.1	Martínez-Catalán et al., 2004	Stephan et al., 2018	2531.1	15.55	84.6746		1907	18.9	100.336
PO-2	PO2-36	2497.9	43.8	2566.4	19.8	2620.4	25.7	Martínez-Catalán et al., 2004	Stephan et al., 2018	2620.4	12.85	95.3251		2435.8	13.3	100.928
PO-2	PO2-37	2392.1	41.4	2520.8	19.1	2625.2	27	Martínez-Catalán et al., 2004	Stephan et al., 2018	2625.2	13.5	91.1207		579.2	5.9	100.994
PO-2	PO2-38	2538	52.6	2596.2	26.2	2641	25.2	Martínez-Catalán et al., 2004	Stephan et al., 2018	2641	12.6	96.1		627.3	6.45	101.096
PO-2	PO2-39	2609.6	41.7	2644.9	17.9	2671.3	24.3	Martínez-Catalán et al., 2004	Stephan et al., 2018	2671.3	12.15	97.6903		1967.3	17.85	101.693
PO-2	PO2-4	627.3	12.9	625.6	12.8	620.5	153.3	Martínez-Catalán et al., 2004	Stephan et al., 2018	627.3	6.45	101.096		850.3	8.5	102.372
PO-2	PO2-40	2721.1	41	2728.4	17.4	2733.6	23	Martínez-Catalán et al., 2004	Stephan et al., 2018	2733.6	11.5	99.5427		499.7	5.95	102.671
PO-2	PO2-5	650.6	15.2	638.8	27.9	584.5	147.5	Martínez-Catalán et al., 2004	Stephan et al., 2018	650.6	7.6	111.309		912.7	44.1	109.861
PO-2	PO2-6	660.5	15.1	665.1	30.9	666.2	143	Martínez-Catalán et al., 2004	Stephan et al., 2018	660.5	7.55	99.1444		650.6	7.6	111.309
PO-2	PO2-7	672.2	16.8	673.9	37.7	673.1	140.8	Martínez-Catalán et al., 2004	Stephan et al., 2018	672.2	8.4	99.8663		976.8	10.25	114.608
PO-2	PO2-8	680.9	13.3	688.2	17.1	700.5	137.9	Martínez-Catalán et al., 2004	Stephan et al., 2018	680.9	6.65	97.202		996.7	12.7	114.88
PO-2	PO2-9	850.3	17	850.3	21.7	830.6	106.3	Martínez-Catalán et al., 2004	Stephan et al., 2018	850.3	8.5	102.372		935.1	7.8	117.019
														PO-3	Lower Devonian
PO-3	PO3-1	570.9	12.4	583.9	16.9	634.7	168.7	Martínez-Catalán et al., 2004	Stephan et al., 2018	570.9	6.2	89.948		535.4	5.35	80.3663
PO-3	PO3-10	875.1	34.9	930.2	83.9	987.8	97.8	Martínez-Catalán et al., 2004	Stephan et al., 2018	875.1	17.45	88.5908		867.8	9.6	81.4912
PO-3	PO3-11	806.7	15.9	826.1	15	879.8	112.7	Martínez-Catalán et al., 2004	Stephan et al., 2018	806.7	7.95	91.6913		914.3	8.95	82.7646
PO-3	PO3-12	815.8	15.9	838.1	13.5	897.8	111	Martínez-Catalán et al., 2004	Stephan et al., 2018	815.8	7.95	90.8666		1961.4	22.25	84.093
PO-3	PO3-13	970.7	17.2	988.4	14.3	1026.9	90.3	Martínez-Catalán et al., 2004	Stephan et al., 2018	970.7	8.6	94.5272		875.1	17.45	88.5908
PO-3	PO3-14	958.4	16.7	985.7	13.7	1043.3	91.2	Martínez-Catalán et al., 2004	Stephan et al., 2018	958.4	8.35	91.8624		720.2	6.9	89.4214
PO-3	PO3-15	867.8	19.2	925.1	20.3	1064.9	101.3	Martínez-Catalán et al., 2004	Stephan et al., 2018	867.8	9.6	81.4912		570.9	6.2	89.948
PO-3	PO3-16	1066.2	30.1	1083	55.6	1107.3	80.3	Martínez-Catalán et al., 2004	Stephan et al., 2018	1107.3	40.15	96.2883		520	4.75	90.0901
PO-3	PO3-17	985.4	17.7	1014.6	14.3	1078.3	88.2	Martínez-Catalán et al., 2004	Stephan et al., 2018	985.4	8.85	91.3846		815.8	7.95	90.8666
PO-3	PO3-18	914.3	17.9	972	14.7	1104.7	95.2	Martínez-Catalán et al., 2004	Stephan et al., 2018	914.3	8.95	82.7646		985.4	8.85	91.3846
PO-3	PO3-19	1649.4	31	1792.2	19.1	1961.4	44.5	Martínez-Catalán et al., 2004	Stephan et al., 2018	1961.4	22.25	84.093		806.7	7.95	91.6913
PO-3	PO3-2	520	9.5	531.1	10.3	577.2	187.6	Martínez-Catalán et al., 2004	Stephan et al., 2018	520	4.75	90.0901		958.4	8.35	91.8624
PO-3	PO3-20	1869.1	32.3	1924.7	16.7	1984.9	38.5	Martínez-Catalán et al., 2004	Stephan et al., 2018	1984.9	19.25	94.166		2612.9	13.25	93.2527
PO-3	PO3-21	2436.6	39.8	2534.4	18.2	2612.9	26.5	Martínez-Catalán et al., 2004	Stephan et al., 2018	2612.9	13.25	93.2527		603.9	5.85	94.0947
PO-3	PO3-22	2503.2	38.9	2582.1	17.9	2643.8	25.6	Martínez-Catalán et al., 2004	Stephan et al., 2018	2643.8	12.8	94.6819		1984.9	19.25	94.166
PO-3	PO3-23	2621.1	42.5	2686.2	18.5	2733.6	24	Martínez-Catalán et al., 2004	Stephan et al., 2018	2733.6	12	95.8845		970.7	8.6	94.5272
PO-3	PO3-3	605	11.7	612.8	12.3	638.3	158.4	Martínez-Catalán et al., 2004	Stephan et al., 2018	605	5.85	94.783		2643.8	12.8	94.6819
PO-3	PO3-4	617.9	12.9	624.8	14.3	645.3	154.7	Martínez-Catalán et al., 2004	Stephan et al., 2018	617.9	6.45	95.7539		605	5.85	94.783
PO-3	PO3-5	603.9	11.7	611.9	10.6	641.8	158.9	Martínez-Catalán et al., 2004	Stephan et al., 2018	603.9	5.85	94.0947		617.9	6.45	95.7539
PO-3	PO3-6	653	12.8	656	14.2	666.2	145.7	Martínez-Catalán et al., 2004	Stephan et al., 2018	653	6.4	98.0186		2733.6	12	95.8845
PO-3	PO3-7	535.4	10.7	560.9	11.7	666.2	179.5	Martínez-Catalán et al., 2004	Stephan et al., 2018	535.4	5.35	80.3663		1107.3	40.15	96.2883
PO-3	PO3-8	720.2	13.8	742	14.5	805.4	128.4	Martínez-Catalán et al., 2004	Stephan et al., 2018	720.2	6.9	89.4214		857.7	8.2	97.8328
PO-3	PO3-9	857.7	16.4	863.4	13.4	876.7	105.5	Martínez-Catalán et al., 2004	Stephan et al., 2018	857.7	8.2	97.8328		653	6.4	98.0186
														#108579	Ediacaran
#108579	1	340.9	8	336.7	10.3	306.2	59.3	Orejana et al., 2015	Stephan et al., 2018	340.9	4	111.332		326.8	1.6	80.2751
#108579	2	339.6	4	335.6	12	306.2	91.1	Orejana et al., 2015	Stephan et al., 2018	339.6	2	110.908		328	1.3	80.5699
#108579	3	335.4	3.3	333.7	4	323.5	18.3	Orejana et al., 2015	Stephan et al., 2018	335.4	1.65	103.679		494.9	2.85	83.6404
#108579	4	326.8	5.7	325.9	7.8	319.2	50	Orejana et al., 2015	Stephan et al., 2018	326.8	2.85	102.381		870.6	3.25	87.3833
#108579	5	331.1	3.2	331.6	6.8	332.1	49.9	Orejana et al., 2015	Stephan et al., 2018	331.1	1.6	99.6989		322.5	1.9	89.1623
#108579	6	331.1	4.5	330.3	4.5	323.5	18.3	Orejana et al., 2015	Stephan et al., 2018	331.1	2.25	102.349		669.8	3.8	93.8095
#108579	7	328	3.8	327.6	3.9	323.5	18.3	Orejana et al., 2015	Stephan et al., 2018	328	1.9	101.391		633.7	5.45	94.6245
#108579	8	317.6	2.5	317.7	3.3	319.2	22.8	Orejana et al., 2015	Stephan et al., 2018	317.6	1.25	99.4987		617.3	3.55	95.6609
#108579	9	326.8	3.2	336.8	4.6	407.1	22.5	Orejana et al., 2015	Stephan et al., 2018	326.8	1.6	80.2751		669.3	9.55	96.012
#108579	10	328	2.6	337.8	3.5	407.1	22.5	Orejana et al., 2015	Stephan et al., 2018	328	1.3	80.5699		612.7	5.25	97.0691
#108579	11	323.1	3.2	323.4	3.9	323.5	22.8	Orejana et al., 2015	Stephan et al., 2018	323.1	1.6	99.8764		1088.9	8.1	97.3827
#108579	12	323.1	3.2	322.5	3.3	314.9	18.3	Orejana et al., 2015	Stephan et al., 2018	323.1	1.6	102.604		1946.5	16.15	98.654
#108579	13	317	3.7	316.8	4.9	314.9	27.4	Orejana et al., 2015	Stephan et al., 2018	317	1.85	100.667		317.6	1.25	99.4987
#108579	15	322.5	3.8	327.4	4.5	361.7	22.6	Orejana et al., 2015	Stephan et al., 2018	322.5	1.9	89.1623		331.1	1.6	99.6989
#108579	16	319.4	3.1	319.7	3.8	319.2	22.8	Orejana et al., 2015	Stephan et al., 2018	319.4	1.55	100.063		604.4	2.3	99.7031
#108579	18	812.3	12.2	809.1	10.1	799.1	12.7	Orejana et al., 2015	Stephan et al., 2018	812.3	6.1	101.652		323.1	1.6	99.8764
#108579	22	669.3	19.1	676.2	16.8	697.1	34.1	Orejana et al., 2015	Stephan et al., 2018	669.3	9.55	96.012		319.4	1.55	100.063
#108579	23	870.6	6.5	906.9	8.4	996.3	20.4	Orejana et al., 2015	Stephan et al., 2018	870.6	3.25	87.3833		317	1.85	100.667
#108579	24	612.7	10.5	617.2	9.3	631.2	17.3	Orejana et al., 2015	Stephan et al., 2018	612.7	5.25	97.0691		328	1.9	101.391
#108579	25	2053.4	38.7	2026.5	22.9	1997.9	18	Orejana et al., 2015	Stephan et al., 2018	1997.9	9	102.778		812.3	6.1	101.652
#108579	26	617.3	7.1	624	6.5	645.3	17.3	Orejana et al., 2015	Stephan et al., 2018	617.3	3.55	95.6609		331.1	2.25	102.349
#108579	28	1060.4	19.6	1069.9	14.6	1088.9	16.2	Orejana et al., 2015	Stephan et al., 2018	1088.9	8.1	97.3827		326.8	2.85	102.381
#108579	30	669.8	7.6	680	8.9	714	25.6	Orejana et al., 2015	Stephan et al., 2018	669.8	3.8	93.8095		323.1	1.6	102.604
#108579	41	683.8	9.1	663.5	8.8	595.4	21.8	Orejana et al., 2015	Stephan et al., 2018	683.8	4.55	114.847		1997.9	9	102.778
#108579	43	633.7	10.9	641.6	9.5	669.7	17.2	Orejana et al., 2015	Stephan et al., 2018	633.7	5.45	94.6245		649.5	3.7	103.473
#108579	44	555.5	7.5	548.7	8.5	521.2	30.8	Orejana et al., 2015	Stephan et al., 2018	555.5	3.75	106.581		335.4	1.65	103.679
#108579	45	588.6	5.6	580.6	7.1	547.6	21.9	Orejana et al., 2015	Stephan et al., 2018	588.6	2.8	107.487		633.1	2.4	103.821
#108579	46	588	5.6	582.9	5.3	562.4	13.2	Orejana et al., 2015	Stephan et al., 2018	588	2.8	104.552		588	2.8	104.552
#108579	47	586.8	6.7	579	8.8	547.6	39.4	Orejana et al., 2015	Stephan et al., 2018	586.8	3.35	107.159		654.1	4.35	105.415
#108579	49	1920.3	20	1933.4	19.1	1946.5	32.3	Orejana et al., 2015	Stephan et al., 2018	1946.5	16.15	98.654		555.5	3.75	106.581
#108579	50	604.4	4.6	605	6.4	606.2	21.7	Orejana et al., 2015	Stephan et al., 2018	604.4	2.3	99.7031		586.8	3.35	107.159
#108579	51	494.9	5.7	512.8	8.1	591.7	34.7	Orejana et al., 2015	Stephan et al., 2018	494.9	2.85	83.6404		588.6	2.8	107.487
#108579	52	633.1	4.8	628.5	5.6	609.8	21.7	Orejana et al., 2015	Stephan et al., 2018	633.1	2.4	103.821		339.6	2	110.908
#108579	53	654.1	8.7	646.9	9.6	620.5	26	Orejana et al., 2015	Stephan et al., 2018	654.1	4.35	105.415		340.9	4	111.332
#108579	54	649.5	7.4	644.8	7.6	627.7	21.6	Orejana et al., 2015	Stephan et al., 2018	649.5	3.7	103.473		683.8	4.55	114.847
														#110190	Ediacaran
#110190	1	833.9	15.7	860.8	13.9	930.4	28.8	Orejana et al., 2015	Stephan et al., 2018	833.9	7.85	89.6281		2093.1	19.4	82.7863
#110190	2	728.8	6.9	723.7	9.3	707.3	34.1	Orejana et al., 2015	Stephan et al., 2018	728.8	3.45	103.04		703.5	4.65	82.8427
#110190	3	692.5	6.6	698.4	10.1	717.4	38.3	Orejana et al., 2015	Stephan et al., 2018	692.5	3.3	96.5291		477	3.2	83.7136
#110190	4	691.3	11.8	693	11.1	697.1	29.9	Orejana et al., 2015	Stephan et al., 2018	691.3	5.9	99.168		734	4.15	84.0105
#110190	5	1992.1	27.4	2039.4	22.9	2086.3	35.3	Orejana et al., 2015	Stephan et al., 2018	2086.3	17.65	95.4848		640.7	4.25	84.2583
#110190	6	628.5	6	640.2	8.6	680	30	Orejana et al., 2015	Stephan et al., 2018	628.5	3	92.4265		648.3	3.7	85.6294
#110190	7	633.7	6	656	8.7	734.1	33.9	Orejana et al., 2015	Stephan et al., 2018	633.7	3	86.3234		633.7	3	86.3234
#110190	8	759.3	8.6	789.6	9.9	876.7	29.1	Orejana et al., 2015	Stephan et al., 2018	759.3	4.3	86.6089		759.3	4.3	86.6089
#110190	9	765	7.2	785.4	9.9	843	29.2	Orejana et al., 2015	Stephan et al., 2018	765	3.6	90.7473		877.9	2.45	86.895
#110190	10	741.5	7	738.6	8.4	727.4	25.5	Orejana et al., 2015	Stephan et al., 2018	741.5	3.5	101.938		728.8	2.75	87.4175
#110190	11	694.2	5.3	691	7	680	25.7	Orejana et al., 2015	Stephan et al., 2018	694.2	2.65	102.088		870.6	7.35	88.6378
#110190	12	734	8.3	769.4	10.8	873.7	33.2	Orejana et al., 2015	Stephan et al., 2018	734	4.15	84.0105		588	3.4	88.7145
#110190	13	726	9.6	726.8	12.5	727.4	42.4	Orejana et al., 2015	Stephan et al., 2018	726	4.8	99.8075		723.1	2.75	89.4262
#110190	14	612.7	8.2	621.7	10.2	652.3	38.7	Orejana et al., 2015	Stephan et al., 2018	612.7	4.1	93.9292		833.9	7.85	89.6281
#110190	15	651.2	5	664.1	7.8	707.3	29.8	Orejana et al., 2015	Stephan et al., 2018	651.2	2.5	92.0684		765	3.6	90.7473
#110190	16	788.4	8.9	783.7	9.8	770.1	29.5	Orejana et al., 2015	Stephan et al., 2018	788.4	4.45	102.376		2397.8	12	91.1294
#110190	17	836.2	9.4	841.7	10.3	855.4	29.2	Orejana et al., 2015	Stephan et al., 2018	836.2	4.7	97.7554		946.8	6.15	91.2315
#110190	18	779.3	7.4	768.6	8.6	737.4	25.5	Orejana et al., 2015	Stephan et al., 2018	779.3	3.7	105.682		1910.1	14.45	91.3355
#110190	19	655.3	6.2	656.5	7.7	659.3	25.8	Orejana et al., 2015	Stephan et al., 2018	655.3	3.1	99.3933		808.9	3.05	91.6289
#110190	20	770.7	8.7	783.3	9.8	818.1	25.2	Orejana et al., 2015	Stephan et al., 2018	770.7	4.35	94.2061		1332.8	9.75	91.7617
#110190	22	631.4	6	635.1	7.6	648.8	30.1	Orejana et al., 2015	Stephan et al., 2018	631.4	3	97.3181		651.2	2.5	92.0684
#110190	23	2322.8	27.3	2387.2	20.3	2442.2	27.3	Orejana et al., 2015	Stephan et al., 2018	2442.2	13.65	95.111		594.5	2.85	92.1277
#110190	24	703.5	9.3	739.2	9.5	849.2	25	Orejana et al., 2015	Stephan et al., 2018	703.5	4.65	82.8427		628.5	3	92.4265
#110190	29	672.2	7.7	670.3	8.8	662.8	30.1	Orejana et al., 2015	Stephan et al., 2018	672.2	3.85	101.418		1210.8	13.85	92.8807
#110190	30	640.7	8.5	668.3	10.8	760.4	38	Orejana et al., 2015	Stephan et al., 2018	640.7	4.25	84.2583		653	3.75	93.6738
#110190	31	1732.8	30.4	1902.7	25.8	2093.1	38.8	Orejana et al., 2015	Stephan et al., 2018	2093.1	19.4	82.7863		612.7	4.1	93.9292
#110190	32	682.6	7.8	688.9	10	707.3	34.1	Orejana et al., 2015	Stephan et al., 2018	682.6	3.9	96.5078		501.5	1.45	94.1607
#110190	33	880.2	8.2	878.8	9.4	873.7	24.9	Orejana et al., 2015	Stephan et al., 2018	880.2	4.1	100.744		770.7	4.35	94.2061
#110190	34	870.6	14.7	903.3	14.4	982.2	32.7	Orejana et al., 2015	Stephan et al., 2018	870.6	7.35	88.6378		2442.2	13.65	95.111
#110190	35	653	7.5	663.2	8.8	697.1	29.9	Orejana et al., 2015	Stephan et al., 2018	653	3.75	93.6738		2086.3	17.65	95.4848
#110190	36	946.8	12.3	974.6	13.8	1037.8	32.4	Orejana et al., 2015	Stephan et al., 2018	946.8	6.15	91.2315		521.7	2	95.936
#110190	37	853.1	9.6	855	11.6	858.4	37.4	Orejana et al., 2015	Stephan et al., 2018	853.1	4.8	99.3826		682.6	3.9	96.5078
#110190	38	742.1	9.8	726.9	13.5	680	42.8	Orejana et al., 2015	Stephan et al., 2018	742.1	4.9	109.132		692.5	3.3	96.5291
#110190	39	1744.6	24.5	1821.3	18.7	1910.1	28.9	Orejana et al., 2015	Stephan et al., 2018	1910.1	14.45	91.3355		631.4	3	97.3181
#110190	41	648.3	7.4	673.2	8.9	757.1	29.6	Orejana et al., 2015	Stephan et al., 2018	648.3	3.7	85.6294		836.2	4.7	97.7554
#110190	42	659.4	6.3	654.4	7.7	638.3	25.9	Orejana et al., 2015	Stephan et al., 2018	659.4	3.15	103.306		691.3	5.9	99.168
#110190	43	588	6.8	603.9	8.2	662.8	30.1	Orejana et al., 2015	Stephan et al., 2018	588	3.4	88.7145		853.1	4.8	99.3826
#110190	44	589.2	13.5	580.7	16.8	547.6	61.2	Orejana et al., 2015	Stephan et al., 2018	589.2	6.75	107.597		655.3	3.1	99.3933
#110190	45	1124.6	16.5	1154.7	15.2	1210.8	27.7	Orejana et al., 2015	Stephan et al., 2018	1210.8	13.85	92.8807		814.1	3.05	99.5111
#110190	46	814.6	19.9	814.8	17.9	814.9	33.5	Orejana et al., 2015	Stephan et al., 2018	814.6	9.95	99.9632		726	4.8	99.8075
#110190	47	521.7	4	525.6	5.8	543.8	26.3	Orejana et al., 2015	Stephan et al., 2018	521.7	2	95.936		601.5	2.9	99.8175
#110190	48	496.7	3.8	495.8	5.5	490.5	22.1	Orejana et al., 2015	Stephan et al., 2018	496.7	1.9	101.264		814.6	9.95	99.9632
#110190	49	510.4	4.9	510.4	6.4	509.8	26.5	Orejana et al., 2015	Stephan et al., 2018	510.4	2.45	100.118		510.4	2.45	100.118
#110190	50	2185.1	22.3	2297.4	16.4	2397.8	24	Orejana et al., 2015	Stephan et al., 2018	2397.8	12	91.1294		880.2	4.1	100.744
#110190	51	723.1	5.5	744.1	7.4	808.6	25.2	Orejana et al., 2015	Stephan et al., 2018	723.1	2.75	89.4262		880.2	5.75	100.744
#110190	52	728.8	5.5	755	6.4	833.7	20.9	Orejana et al., 2015	Stephan et al., 2018	728.8	2.75	87.4175		583.9	3.35	101.161
#110190	53	501.5	2.9	507.6	5.6	532.6	26.4	Orejana et al., 2015	Stephan et al., 2018	501.5	1.45	94.1607		496.7	1.9	101.264
#110190	54	493.1	3.8	492	4.7	486.7	22.2	Orejana et al., 2015	Stephan et al., 2018	493.1	1.9	101.315		580.9	2.25	101.29
#110190	55	580.9	4.5	579.1	5.3	573.5	17.5	Orejana et al., 2015	Stephan et al., 2018	580.9	2.25	101.29		493.1	1.9	101.315
#110190	56	583.9	6.7	583	6.2	577.2	21.8	Orejana et al., 2015	Stephan et al., 2018	583.9	3.35	101.161		672.2	3.85	101.418
#110190	58	1223	26.7	1263.1	18.8	1332.8	19.5	Orejana et al., 2015	Stephan et al., 2018	1332.8	9.75	91.7617		486.6	2.35	101.608
#110190	59	814.1	6.1	815.2	7.9	818.1	25.2	Orejana et al., 2015	Stephan et al., 2018	814.1	3.05	99.5111		741.5	3.5	101.938
#110190	60	808.9	6.1	829.3	9.1	882.8	29	Orejana et al., 2015	Stephan et al., 2018	808.9	3.05	91.6289		694.2	2.65	102.088
#110190	61	877.9	4.9	917	7.3	1010.3	20.4	Orejana et al., 2015	Stephan et al., 2018	877.9	2.45	86.895		500.9	1.95	102.12
#110190	62	880.2	11.5	878.7	9.4	873.7	20.8	Orejana et al., 2015	Stephan et al., 2018	880.2	5.75	100.744		788.4	4.45	102.376
#110190	66	477	6.4	493.7	7	569.8	26.2	Orejana et al., 2015	Stephan et al., 2018	477	3.2	83.7136		728.8	3.45	103.04
#110190	67	500.9	3.9	499.3	5.5	490.5	22.1	Orejana et al., 2015	Stephan et al., 2018	500.9	1.95	102.12		659.4	3.15	103.306
#110190	68	486.6	4.7	485.3	5.4	478.9	22.2	Orejana et al., 2015	Stephan et al., 2018	486.6	2.35	101.608		779.3	3.7	105.682
#110190	69	594.5	5.7	605.5	7.3	645.3	25.9	Orejana et al., 2015	Stephan et al., 2018	594.5	2.85	92.1277		589.2	6.75	107.597
#110190	70	601.5	5.8	601.7	6.4	602.6	21.7	Orejana et al., 2015	Stephan et al., 2018	601.5	2.9	99.8175		742.1	4.9	109.132
														#110194	Ediacaran
#110194	1	609.7	5.8	624.9	6.5	680	21.5	Orejana et al., 2015	Stephan et al., 2018	609.7	2.9	89.6618		582.1	2.8	80.3894
#110194	2	664	5.1	664.5	5.9	666.2	21.5	Orejana et al., 2015	Stephan et al., 2018	664	2.55	99.6698		1332.8	17.45	81.3625
#110194	3	656.5	8.7	658.4	9.7	666.2	34.3	Orejana et al., 2015	Stephan et al., 2018	656.5	4.35	98.544		641.3	3.65	81.8925
#110194	4	708.7	4	703.2	5.1	686.9	17.2	Orejana et al., 2015	Stephan et al., 2018	708.7	2	103.174		611.5	2.35	82.557
#110194	5	1004.4	5.6	1005.6	6.4	1007.5	12.4	Orejana et al., 2015	Stephan et al., 2018	1007.5	6.2	99.6923		709.2	5.4	84.4386
#110194	7	550.8	6.3	555.2	6.9	569.8	26.2	Orejana et al., 2015	Stephan et al., 2018	550.8	3.15	96.6655		2406.5	10.3	85.0904
#110194	8	855.4	6.4	883.3	5.9	953.6	16.5	Orejana et al., 2015	Stephan et al., 2018	855.4	3.2	89.7022		620.3	4.15	86.0691
#110194	9	670.4	3.8	669.3	4.9	666.2	17.3	Orejana et al., 2015	Stephan et al., 2018	670.4	1.9	100.63		750.1	2.15	86.4569
#110194	11	1658.5	29.3	1770.8	16.8	1905.5	11.1	Orejana et al., 2015	Stephan et al., 2018	1905.5	5.55	87.0375		1905.5	5.55	87.0375
#110194	13	1008.8	5.6	1005.4	10.2	996.3	28.5	Orejana et al., 2015	Stephan et al., 2018	996.3	14.25	101.255		679.1	3.25	87.4453
#110194	14	2132.1	25.4	2278	16.4	2410.9	20.6	Orejana et al., 2015	Stephan et al., 2018	2410.9	10.3	88.4359		735.7	2.8	88.2452
#110194	15	2207.1	18.7	2218.2	16.3	2227.7	24.4	Orejana et al., 2015	Stephan et al., 2018	2227.7	12.2	99.0753		2410.9	10.3	88.4359
#110194	17	983.4	9.1	970.8	10	942	24.7	Orejana et al., 2015	Stephan et al., 2018	983.4	4.55	104.395		465	2.25	89.2172
#110194	18	907.7	5.1	902.4	6	888.8	16.7	Orejana et al., 2015	Stephan et al., 2018	907.7	2.55	102.126		609.7	2.9	89.6618
#110194	19	975.1	9.1	972.1	10	965.1	24.6	Orejana et al., 2015	Stephan et al., 2018	975.1	4.55	101.036		855.4	3.2	89.7022
#110194	20	708.7	9.4	714.7	8.2	734.1	17.1	Orejana et al., 2015	Stephan et al., 2018	708.7	4.7	96.54		613.2	2.35	89.7147
#110194	21	465	4.5	474.3	6.1	521.2	30.8	Orejana et al., 2015	Stephan et al., 2018	465	2.25	89.2172		3450.8	15.6	90.1559
#110194	22	750.1	4.3	780.9	7.6	867.6	29.1	Orejana et al., 2015	Stephan et al., 2018	750.1	2.15	86.4569		2403.3	10.3	90.176
#110194	23	615.6	3.5	610.7	5.5	591.7	26.1	Orejana et al., 2015	Stephan et al., 2018	615.6	1.75	104.039		836.2	5.5	90.4489
#110194	24	927.3	12.1	952.4	11.1	1010.3	16.4	Orejana et al., 2015	Stephan et al., 2018	927.3	6.05	91.7846		606.2	2.9	90.5181
#110194	26	1084.4	22	1170.4	19.5	1332.8	34.9	Orejana et al., 2015	Stephan et al., 2018	1332.8	17.45	81.3625		927.3	6.05	91.7846
#110194	28	619.7	7.1	627.7	7.5	655.8	21.5	Orejana et al., 2015	Stephan et al., 2018	619.7	3.55	94.4953		2003.7	5.5	91.9649
#110194	30	696.5	7.9	703.1	7.1	724.1	17.1	Orejana et al., 2015	Stephan et al., 2018	696.5	3.95	96.1884		618.5	3.55	92.3548
#110194	31	643.6	8.6	643.5	8.6	641.8	17.3	Orejana et al., 2015	Stephan et al., 2018	643.6	4.3	100.28		2107.9	8.9	92.9314
#110194	32	604.4	5.8	611.3	6.4	638.3	21.6	Orejana et al., 2015	Stephan et al., 2018	604.4	2.9	94.689		2611	3.7	93.4355
#110194	33	827.1	9.3	831	9.1	839.9	20.9	Orejana et al., 2015	Stephan et al., 2018	827.1	4.65	98.476		676.2	3.85	94.257
#110194	34	611.5	4.7	640	6.7	740.7	25.5	Orejana et al., 2015	Stephan et al., 2018	611.5	2.35	82.557		619.7	3.55	94.4953
#110194	36	618.5	7.1	630.3	8.5	669.7	30	Orejana et al., 2015	Stephan et al., 2018	618.5	3.55	92.3548		604.4	2.9	94.689
#110194	37	679.1	6.5	702.3	7.1	776.6	17	Orejana et al., 2015	Stephan et al., 2018	679.1	3.25	87.4453		689	4.6	94.7209
#110194	38	641.3	7.3	673.5	8.9	783.1	25.3	Orejana et al., 2015	Stephan et al., 2018	641.3	3.65	81.8925		1987.8	9	96.0459
#110194	39	735.7	5.6	761	8.6	833.7	29.3	Orejana et al., 2015	Stephan et al., 2018	735.7	2.8	88.2452		1054.1	16.15	96.0725
#110194	42	2043.5	35	2025.8	19.3	2006.6	21.5	Orejana et al., 2015	Stephan et al., 2018	2006.6	10.75	101.839		696.5	3.95	96.1884
#110194	43	709.2	10.8	741.2	12.6	839.9	37.5	Orejana et al., 2015	Stephan et al., 2018	709.2	5.4	84.4386		708.7	4.7	96.54
#110194	44	582.1	5.6	612	9.2	724.1	38.2	Orejana et al., 2015	Stephan et al., 2018	582.1	2.8	80.3894		550.8	3.15	96.6655
#110194	45	1019.3	13.2	1024.2	11.6	1035.1	20.3	Orejana et al., 2015	Stephan et al., 2018	1035.1	10.15	98.4736		791.9	3.75	96.7975
#110194	46	1012.7	13.1	1025.9	14.2	1054.1	32.3	Orejana et al., 2015	Stephan et al., 2018	1054.1	16.15	96.0725		898.2	10.05	97.4609
#110194	47	2047.7	31.6	2232.8	19.9	2406.5	20.6	Orejana et al., 2015	Stephan et al., 2018	2406.5	10.3	85.0904		1976.1	9	97.5609
#110194	48	1958.9	30.4	2033	17.6	2107.9	17.8	Orejana et al., 2015	Stephan et al., 2018	2107.9	8.9	92.9314		633.1	3.6	98.1094
#110194	49	633.1	7.2	635.8	6.6	645.3	21.6	Orejana et al., 2015	Stephan et al., 2018	633.1	3.6	98.1094		585	2.25	98.2533
#110194	50	2167.2	33.1	2291.1	20.1	2403.3	20.6	Orejana et al., 2015	Stephan et al., 2018	2403.3	10.3	90.176		1035.1	10.15	98.4736
#110194	52	836.2	11	861.3	10.5	924.5	24.8	Orejana et al., 2015	Stephan et al., 2018	836.2	5.5	90.4489		827.1	4.65	98.476
#110194	54	777.6	8.8	775.4	8.7	770.1	21.2	Orejana et al., 2015	Stephan et al., 2018	777.6	4.4	100.974		656.5	4.35	98.544
#110194	55	939	10.5	934.6	8.6	924.5	12.5	Orejana et al., 2015	Stephan et al., 2018	939	5.25	101.568		1062.2	14.15	99.0586
#110194	56	606.2	5.8	620.2	8.4	669.7	30	Orejana et al., 2015	Stephan et al., 2018	606.2	2.9	90.5181		2227.7	12.2	99.0753
#110194	57	1927.9	26.7	1952	15.7	1976.1	18	Orejana et al., 2015	Stephan et al., 2018	1976.1	9	97.5609		764.4	4.35	99.2598
#110194	60	676.2	7.7	686.1	8	717.4	17.1	Orejana et al., 2015	Stephan et al., 2018	676.2	3.85	94.257		966.2	3.6	99.5262
#110194	61	966.2	7.2	967.7	11.2	970.8	32.7	Orejana et al., 2015	Stephan et al., 2018	966.2	3.6	99.5262		596.2	5.15	99.5326
#110194	62	3111.1	69.1	3321.8	35.2	3450.8	31.2	Orejana et al., 2015	Stephan et al., 2018	3450.8	15.6	90.1559		664	2.55	99.6698
#110194	64	764.4	8.7	766.3	7.6	770.1	21.2	Orejana et al., 2015	Stephan et al., 2018	764.4	4.35	99.2598		1007.5	6.2	99.6923
#110194	65	689	9.2	698.3	8.1	727.4	12.9	Orejana et al., 2015	Stephan et al., 2018	689	4.6	94.7209		1007.5	12.2	99.8015
#110194	66	647.7	7.4	647.6	6.7	645.3	13.1	Orejana et al., 2015	Stephan et al., 2018	647.7	3.7	100.372		643.6	4.3	100.28
#110194	67	679.1	9	678.4	7.9	676.6	17.2	Orejana et al., 2015	Stephan et al., 2018	679.1	4.5	100.369		679.1	4.5	100.369
#110194	69	653	7.5	648.7	6.7	631.2	8.8	Orejana et al., 2015	Stephan et al., 2018	653	3.75	103.454		647.7	3.7	100.372
#110194	71	1842.7	28.9	1920.3	15.6	2003.7	11	Orejana et al., 2015	Stephan et al., 2018	2003.7	5.5	91.9649		806.1	5.3	100.474
#110194	72	592.1	7.9	587.6	6.3	569.8	8.9	Orejana et al., 2015	Stephan et al., 2018	592.1	3.95	103.914		670.4	1.9	100.63
#110194	73	596.2	10.3	596.7	8.1	599	4.8	Orejana et al., 2015	Stephan et al., 2018	596.2	5.15	99.5326		772.4	4.35	100.717
#110194	75	613.2	8.2	605.8	6.4	577.2	13.2	Orejana et al., 2015	Stephan et al., 2018	613.2	4.1	106.237		610.9	2.9	100.775
#110194	76	806.1	10.6	805.2	7.8	802.3	8.6	Orejana et al., 2015	Stephan et al., 2018	806.1	5.3	100.474		629	3	100.785
#110194	77	629	8.4	627	7.5	617	17.4	Orejana et al., 2015	Stephan et al., 2018	629	4.2	101.945		777.6	4.4	100.974
#110194	78	2439.6	44.7	2534.8	20.6	2611	7.4	Orejana et al., 2015	Stephan et al., 2018	2611	3.7	93.4355		975.1	4.55	101.036
#110194	80	548.4	9.5	543.3	8.4	521.2	17.7	Orejana et al., 2015	Stephan et al., 2018	548.4	4.75	105.219		996.3	14.25	101.255
#110194	81	1052.2	13.6	1055.4	13.1	1062.2	28.3	Orejana et al., 2015	Stephan et al., 2018	1062.2	14.15	99.0586		610.9	2.35	101.377
#110194	82	772.4	8.7	770.8	7.6	766.9	12.8	Orejana et al., 2015	Stephan et al., 2018	772.4	4.35	100.717		939	5.25	101.568
#110194	83	898.2	20.1	905.1	15.6	921.6	24.8	Orejana et al., 2015	Stephan et al., 2018	898.2	10.05	97.4609		2006.6	10.75	101.839
#110194	84	620.3	8.3	642.2	8.6	720.7	21.3	Orejana et al., 2015	Stephan et al., 2018	620.3	4.15	86.0691		629	4.2	101.945
#110194	85	1005.5	13	1006.4	11.5	1007.5	24.4	Orejana et al., 2015	Stephan et al., 2018	1007.5	12.2	99.8015		907.7	2.55	102.126
#110194	86	631.4	3.6	625.7	5.6	606.2	21.7	Orejana et al., 2015	Stephan et al., 2018	631.4	1.8	104.157		708.7	2	103.174
#110194	88	610.9	4.7	609.7	8.3	602.6	34.7	Orejana et al., 2015	Stephan et al., 2018	610.9	2.35	101.377		653	3.75	103.454
#110194	89	610.9	5.8	609.5	8.3	606.2	34.7	Orejana et al., 2015	Stephan et al., 2018	610.9	2.9	100.775		592.1	3.95	103.914
#110194	90	1909.2	13.3	1947.7	12.2	1987.8	18	Orejana et al., 2015	Stephan et al., 2018	1987.8	9	96.0459		615.6	1.75	104.039
#110194	91	791.9	7.5	799	10	818.1	29.3	Orejana et al., 2015	Stephan et al., 2018	791.9	3.75	96.7975		631.4	1.8	104.157
#110194	92	613.2	4.7	628.7	5.6	683.5	21.5	Orejana et al., 2015	Stephan et al., 2018	613.2	2.35	89.7147		769	3.65	104.285
#110194	93	629	6	628	8.4	624.1	30.3	Orejana et al., 2015	Stephan et al., 2018	629	3	100.785		983.4	4.55	104.395
#110194	94	769	7.3	761.2	7.5	737.4	21.3	Orejana et al., 2015	Stephan et al., 2018	769	3.65	104.285		548.4	4.75	105.219
#110194	95	585	4.5	587.2	6.3	595.4	21.8	Orejana et al., 2015	Stephan et al., 2018	585	2.25	98.2533		613.2	4.1	106.237
														#111031	Ediacaran
#111031	1	704	32	739.4	26.3	849.2	33.3	Orejana et al., 2015	Stephan et al., 2018	704	16	82.9016		492.5	5.2	82.2204
#111031	2	375.6	7.3	376.1	6.9	378.4	27.1	Orejana et al., 2015	Stephan et al., 2018	375.6	3.65	99.26		704	16	82.9016
#111031	3	608.5	18.6	610.7	14.7	617	17.4	Orejana et al., 2015	Stephan et al., 2018	608.5	9.3	98.6224		383.5	3.7	83.4966
#111031	4	639.6	14.6	642.2	13.3	652.3	30.1	Orejana et al., 2015	Stephan et al., 2018	639.6	7.3	98.053		585	6.7	83.5118
#111031	5	365.9	9.3	363.7	12.2	349	67.8	Orejana et al., 2015	Stephan et al., 2018	365.9	4.65	104.842		2583.2	23.45	84.074
#111031	6	360.4	9.1	359	10.3	349	54.3	Orejana et al., 2015	Stephan et al., 2018	360.4	4.55	103.266		2404.4	8.65	84.2871
#111031	7	445.2	16.3	445	14.4	443.4	31.2	Orejana et al., 2015	Stephan et al., 2018	445.2	8.15	100.406		433.7	3.8	85.0726
#111031	8	352.5	7.5	354	10.2	361.7	63.2	Orejana et al., 2015	Stephan et al., 2018	352.5	3.75	97.4565		633.1	5.45	85.4732
#111031	9	961.8	16.1	969.6	12.5	987.8	20.5	Orejana et al., 2015	Stephan et al., 2018	961.8	8.05	97.3679		798.7	13.5	87.7982
#111031	10	576.2	9.9	588.4	10.7	634.7	30.2	Orejana et al., 2015	Stephan et al., 2018	576.2	4.95	90.783		422.3	6.55	88.1812
#111031	13	710.4	55.2	718.8	48.4	744	93.1	Orejana et al., 2015	Stephan et al., 2018	710.4	27.6	95.4839		1256.5	19.6	88.8977
#111031	15	433.7	7.6	446.6	7.2	509.8	22.1	Orejana et al., 2015	Stephan et al., 2018	433.7	3.8	85.0726		380.5	5.9	89.8677
#111031	16	667.5	7.6	672	7.9	686.9	21.4	Orejana et al., 2015	Stephan et al., 2018	667.5	3.8	97.1757		506.3	4.85	90.0249
#111031	17	492.5	10.4	512.2	12.9	599	47.7	Orejana et al., 2015	Stephan et al., 2018	492.5	5.2	82.2204		622	2.95	90.5518
#111031	18	363.5	8.5	362.3	9.8	353.3	45.2	Orejana et al., 2015	Stephan et al., 2018	363.5	4.25	102.887		576.2	4.95	90.783
#111031	19	362.2	4.9	362.4	5.5	361.7	22.6	Orejana et al., 2015	Stephan et al., 2018	362.2	2.45	100.138		789	3.7	91.9152
#111031	21	506.3	9.7	516.7	8.9	562.4	26.2	Orejana et al., 2015	Stephan et al., 2018	506.3	4.85	90.0249		915.5	6.85	93.7532
#111031	22	541.3	9.4	543.9	9.3	555	21.9	Orejana et al., 2015	Stephan et al., 2018	541.3	4.7	97.5315		1054.1	8.15	95.2282
#111031	23	633.1	10.9	657.2	10.7	740.7	29.7	Orejana et al., 2015	Stephan et al., 2018	633.1	5.45	85.4732		594.5	7.4	95.2572
#111031	24	347.6	6.1	344.3	6.4	319.2	31.9	Orejana et al., 2015	Stephan et al., 2018	347.6	3.05	108.897		710.4	27.6	95.4839
#111031	26	383.5	7.4	394.7	7.9	459.3	31.1	Orejana et al., 2015	Stephan et al., 2018	383.5	3.7	83.4966		450.6	13.05	95.6485
#111031	27	362.8	12.7	362.3	11.6	357.5	36.2	Orejana et al., 2015	Stephan et al., 2018	362.8	6.35	101.483		425.9	7	96.0532
#111031	28	622	5.9	636.1	9.5	686.9	38.5	Orejana et al., 2015	Stephan et al., 2018	622	2.95	90.5518		633.7	9.65	96.1171
#111031	30	789	7.4	807.5	10	858.4	29.1	Orejana et al., 2015	Stephan et al., 2018	789	3.7	91.9152		747.2	9.9	97.0264
#111031	31	534.2	7.2	533.2	6.6	528.8	17.6	Orejana et al., 2015	Stephan et al., 2018	534.2	3.6	101.021		667.5	3.8	97.1757
#111031	35	915.5	13.7	933.6	15.9	976.5	40.8	Orejana et al., 2015	Stephan et al., 2018	915.5	6.85	93.7532		961.8	8.05	97.3679
#111031	36	450.6	26.1	454.1	30.8	471.1	128.4	Orejana et al., 2015	Stephan et al., 2018	450.6	13.05	95.6485		352.5	3.75	97.4565
#111031	38	2171.8	25.8	2391.4	29.5	2583.2	46.9	Orejana et al., 2015	Stephan et al., 2018	2583.2	23.45	84.074		541.3	4.7	97.5315
#111031	39	380.5	11.8	387.2	12.9	423.4	49.1	Orejana et al., 2015	Stephan et al., 2018	380.5	5.9	89.8677		598.6	7.45	97.5872
#111031	40	558.5	6.4	551.3	6.8	521.2	26.4	Orejana et al., 2015	Stephan et al., 2018	558.5	3.2	107.157		639.6	7.3	98.053
#111031	42	671.6	5.1	664.3	5.9	638.3	17.3	Orejana et al., 2015	Stephan et al., 2018	671.6	2.55	105.217		1024.1	20.25	98.1838
#111031	43	554.9	6.4	552.5	9.4	540.1	39.4	Orejana et al., 2015	Stephan et al., 2018	554.9	3.2	102.74		787.9	10.4	98.5984
#111031	44	550.2	6.3	549.2	10.2	543.8	43.8	Orejana et al., 2015	Stephan et al., 2018	550.2	3.15	101.177		608.5	9.3	98.6224
#111031	45	425.9	11.5	422	10.4	403.1	22.5	Orejana et al., 2015	Stephan et al., 2018	425.9	5.75	105.656		375.6	3.65	99.26
#111031	47	798.7	27	828.6	22.7	909.7	33	Orejana et al., 2015	Stephan et al., 2018	798.7	13.5	87.7982		589.2	5.05	99.5775
#111031	48	1005.5	11.2	1011.2	15.4	1024.1	40.5	Orejana et al., 2015	Stephan et al., 2018	1024.1	20.25	98.1838		362.2	2.45	100.138
#111031	49	438.6	11	430.5	11.2	386.6	45	Orejana et al., 2015	Stephan et al., 2018	438.6	5.5	113.451		525.9	6.55	100.171
#111031	51	609.7	14	607.1	15.5	595.4	52	Orejana et al., 2015	Stephan et al., 2018	609.7	7	102.402		445.2	8.15	100.406
#111031	52	657.6	6.3	649.4	7.7	620.5	30.3	Orejana et al., 2015	Stephan et al., 2018	657.6	3.15	105.979		534.2	3.6	101.021
#111031	54	1117	14.4	1166	18	1256.5	39.2	Orejana et al., 2015	Stephan et al., 2018	1256.5	19.6	88.8977		550.2	3.15	101.177
#111031	55	589.2	10.1	590	12.5	591.7	43.4	Orejana et al., 2015	Stephan et al., 2018	589.2	5.05	99.5775		362.8	6.35	101.483
#111031	58	620.9	5.9	616.5	7.4	599	30.4	Orejana et al., 2015	Stephan et al., 2018	620.9	2.95	103.656		586.8	7.3	101.663
#111031	59	668.1	15.2	658.4	12.6	624.1	17.4	Orejana et al., 2015	Stephan et al., 2018	668.1	7.6	107.05		560.9	7	101.741
#111031	60	525.9	13.1	525.7	11.5	525	22	Orejana et al., 2015	Stephan et al., 2018	525.9	6.55	100.171		562.6	7	102.05
#111031	61	598.6	14.9	601.7	12.7	613.4	30.3	Orejana et al., 2015	Stephan et al., 2018	598.6	7.45	97.5872		609.7	7	102.402
#111031	62	560.9	14	559.5	12.1	551.3	21.9	Orejana et al., 2015	Stephan et al., 2018	560.9	7	101.741		345.1	4.7	102.617
#111031	63	1003.8	26	1020.3	18	1054.1	16.3	Orejana et al., 2015	Stephan et al., 2018	1054.1	8.15	95.2282		362.8	4.6	102.689
#111031	64	425.9	14	429	11.9	443.4	22.3	Orejana et al., 2015	Stephan et al., 2018	425.9	7	96.0532		554.9	3.2	102.74
#111031	65	586.8	14.6	585.1	12.5	577.2	21.8	Orejana et al., 2015	Stephan et al., 2018	586.8	7.3	101.663		363.5	4.25	102.887
#111031	66	728.3	17.9	719.9	13.4	693.7	13	Orejana et al., 2015	Stephan et al., 2018	728.3	8.95	104.988		360.4	4.55	103.266
#111031	67	787.9	20.8	791.3	15.4	799.1	12.7	Orejana et al., 2015	Stephan et al., 2018	787.9	10.4	98.5984		620.9	2.95	103.656
#111031	68	422.3	13.1	431.1	11.9	478.9	17.8	Orejana et al., 2015	Stephan et al., 2018	422.3	6.55	88.1812		365.9	4.65	104.842
#111031	69	345.1	9.4	344.1	8.8	336.3	31.8	Orejana et al., 2015	Stephan et al., 2018	345.1	4.7	102.617		570.3	7.1	104.873
#111031	70	647.1	16	638.3	13.3	606.2	26	Orejana et al., 2015	Stephan et al., 2018	647.1	8	106.747		339.6	4.3	104.977
#111031	71	633.7	19.3	639.4	16.1	659.3	17.3	Orejana et al., 2015	Stephan et al., 2018	633.7	9.65	96.1171		728.3	8.95	104.988
#111031	72	594.5	14.8	600.8	11.8	624.1	17.4	Orejana et al., 2015	Stephan et al., 2018	594.5	7.4	95.2572		348.8	4.4	105.029
#111031	73	2026.6	69.6	2220.9	36.1	2404.4	17.3	Orejana et al., 2015	Stephan et al., 2018	2404.4	8.65	84.2871		671.6	2.55	105.217
#111031	74	348.8	8.8	346.8	7.6	332.1	13.7	Orejana et al., 2015	Stephan et al., 2018	348.8	4.4	105.029		425.9	5.75	105.656
#111031	75	562.6	14	561	12.9	551.3	26.3	Orejana et al., 2015	Stephan et al., 2018	562.6	7	102.05		657.6	3.15	105.979
#111031	76	747.2	19.8	752.6	16	770.1	25.4	Orejana et al., 2015	Stephan et al., 2018	747.2	9.9	97.0264		647.1	8	106.747
#111031	77	585	13.4	609.3	11.9	700.5	25.6	Orejana et al., 2015	Stephan et al., 2018	585	6.7	83.5118		668.1	7.6	107.05
#111031	78	570.3	14.2	565.1	12.1	543.8	17.6	Orejana et al., 2015	Stephan et al., 2018	570.3	7.1	104.873		558.5	3.2	107.157
#111031	79	362.8	9.2	361.3	8.5	353.3	18.2	Orejana et al., 2015	Stephan et al., 2018	362.8	4.6	102.689		347.6	3.05	108.897
#111031	80	339.6	8.6	337.7	8	323.5	18.3	Orejana et al., 2015	Stephan et al., 2018	339.6	4.3	104.977		438.6	5.5	113.451
														#111032	Ediacaran
#111032	1	369.5	10.1	370.7	9.3	378.4	27.1	Orejana et al., 2015	Stephan et al., 2018	369.5	5.05	97.648		2553.9	5.25	79.3531
#111032	2	1725.4	24.2	1817.9	17	1925.3	21.7	Orejana et al., 2015	Stephan et al., 2018	1925.3	10.85	89.6172		982.8	8.2	82.3391
#111032	3	623.8	10.7	636.2	10.4	680	25.7	Orejana et al., 2015	Stephan et al., 2018	623.8	5.35	91.7353		606.8	11.6	84.1959
#111032	4	597.4	6.9	591.3	8.1	566.1	30.5	Orejana et al., 2015	Stephan et al., 2018	597.4	3.45	105.529		559.1	7.5	87.1144
#111032	5	556.7	3.2	558.2	3.5	562.4	13.2	Orejana et al., 2015	Stephan et al., 2018	556.7	1.6	98.9865		340.9	4	87.2313
#111032	7	456.6	7.9	463.9	6.7	502.1	17.7	Orejana et al., 2015	Stephan et al., 2018	456.6	3.95	90.9381		836.7	6.3	87.7412
#111032	8	825.4	4.7	846.9	6.9	903.8	20.7	Orejana et al., 2015	Stephan et al., 2018	825.4	2.35	91.3255		2590	11.8	88.3784
#111032	9	555.5	13.8	558.1	12	569.8	21.9	Orejana et al., 2015	Stephan et al., 2018	555.5	6.9	97.4903		450.6	5.65	88.3876
#111032	10	614.4	4.7	621.1	5.6	645.3	21.6	Orejana et al., 2015	Stephan et al., 2018	614.4	2.35	95.2115		337.2	3.3	89.1121
#111032	13	516.4	5	518.5	5.7	525	22	Orejana et al., 2015	Stephan et al., 2018	516.4	2.5	98.3619		375	4.35	89.4348
#111032	14	649.5	3.7	643.5	4.8	620.5	17.4	Orejana et al., 2015	Stephan et al., 2018	649.5	1.85	104.674		323.7	2.85	89.4941
#111032	15	450.6	11.3	460.6	10.4	509.8	17.7	Orejana et al., 2015	Stephan et al., 2018	450.6	5.65	88.3876		1925.3	10.85	89.6172
#111032	16	640.7	4.9	636.7	5.7	620.5	17.4	Orejana et al., 2015	Stephan et al., 2018	640.7	2.45	103.255		456.6	3.95	90.9381
#111032	17	683.8	3.9	673.2	5.9	638.3	25.9	Orejana et al., 2015	Stephan et al., 2018	683.8	1.95	107.128		889.7	6.65	91.1111
#111032	18	657.6	6.3	659.4	6.8	666.2	21.5	Orejana et al., 2015	Stephan et al., 2018	657.6	3.15	98.7091		536.6	4.65	91.243
#111032	19	697.1	7.9	690.8	9	669.7	25.8	Orejana et al., 2015	Stephan et al., 2018	697.1	3.95	104.091		825.4	2.35	91.3255
#111032	20	370.1	6.5	370.4	8.1	370	36.1	Orejana et al., 2015	Stephan et al., 2018	370.1	3.25	100.027		920	6	91.5696
#111032	21	617.3	9.4	617.2	9.3	617	26	Orejana et al., 2015	Stephan et al., 2018	617.3	4.7	100.049		623.8	5.35	91.7353
#111032	23	563.2	16.2	561.6	13.8	555	26.3	Orejana et al., 2015	Stephan et al., 2018	563.2	8.1	101.477		444	6	91.9635
#111032	24	572.1	19.7	573.4	16.7	580.8	30.5	Orejana et al., 2015	Stephan et al., 2018	572.1	9.85	98.5021		586.8	5.6	92.9658
#111032	25	487.8	4.7	485.2	6.2	471.1	26.6	Orejana et al., 2015	Stephan et al., 2018	487.8	2.35	103.545		617.3	2.95	94.1293
#111032	26	378.1	6.6	375.2	7.5	357.5	36.2	Orejana et al., 2015	Stephan et al., 2018	378.1	3.3	105.762		643.6	4.9	94.1624
#111032	28	606.2	11.6	602	14.5	588.1	52.1	Orejana et al., 2015	Stephan et al., 2018	606.2	5.8	103.078		509.8	2.45	94.3899
#111032	29	610.9	5.8	609.5	6.4	602.6	21.7	Orejana et al., 2015	Stephan et al., 2018	610.9	2.9	101.377		614.4	2.35	95.2115
#111032	30	579.2	6.7	577.8	7.1	573.5	21.8	Orejana et al., 2015	Stephan et al., 2018	579.2	3.35	100.994		585.6	5.05	95.4679
#111032	31	474	4.6	472.1	6	459.3	31.1	Orejana et al., 2015	Stephan et al., 2018	474	2.3	103.201		549.6	3.7	96.4549
#111032	32	588.6	4.5	581.5	4.4	551.3	13.2	Orejana et al., 2015	Stephan et al., 2018	588.6	2.25	106.766		962.3	5.35	96.5874
#111032	33	582.7	6.7	580.9	7.1	573.5	21.8	Orejana et al., 2015	Stephan et al., 2018	582.7	3.35	101.604		647.7	4.3	96.7149
#111032	34	617.9	7.1	615.5	6.5	606.2	17.4	Orejana et al., 2015	Stephan et al., 2018	617.9	3.55	101.93		487.2	2.35	97.0325
#111032	35	581.5	21.1	582	17.7	584.5	26.1	Orejana et al., 2015	Stephan et al., 2018	581.5	10.55	99.4867		555.5	6.9	97.4903
#111032	36	602.7	8.1	596.7	7.2	573.5	17.5	Orejana et al., 2015	Stephan et al., 2018	602.7	4.05	105.092		369.5	5.05	97.648
#111032	37	549.6	7.4	553.4	10.2	569.8	39.2	Orejana et al., 2015	Stephan et al., 2018	549.6	3.7	96.4549		633.7	6.65	97.6726
#111032	40	615	7	602.3	10.9	555	43.7	Orejana et al., 2015	Stephan et al., 2018	615	3.5	110.811		655.3	4.35	97.8498
#111032	41	536.6	9.3	546.8	11	588.1	39.1	Orejana et al., 2015	Stephan et al., 2018	536.6	4.65	91.243		627.3	6	98.2767
#111032	42	643.6	9.8	653.1	7.7	683.5	8.8	Orejana et al., 2015	Stephan et al., 2018	643.6	4.9	94.1624		474.6	2.75	98.3016
#111032	43	647.7	8.6	652.9	6.8	669.7	8.8	Orejana et al., 2015	Stephan et al., 2018	647.7	4.3	96.7149		516.4	2.5	98.3619
#111032	44	655.3	8.7	658.9	6.8	669.7	13	Orejana et al., 2015	Stephan et al., 2018	655.3	4.35	97.8498		572.1	9.85	98.5021
#111032	45	569.1	7.6	568.2	6.1	562.4	8.9	Orejana et al., 2015	Stephan et al., 2018	569.1	3.8	101.191		657.6	3.15	98.7091
#111032	46	540.1	7.3	540.6	5.9	540.1	9	Orejana et al., 2015	Stephan et al., 2018	540.1	3.65	100		595	4	98.7388
#111032	47	889.7	13.3	915.7	10.9	976.5	20.5	Orejana et al., 2015	Stephan et al., 2018	889.7	6.65	91.1111		556.7	1.6	98.9865
#111032	48	920	12	945.6	9.9	1004.7	12.4	Orejana et al., 2015	Stephan et al., 2018	920	6	91.5696		581.5	10.55	99.4867
#111032	49	836.7	12.6	870.1	9.4	953.6	8.5	Orejana et al., 2015	Stephan et al., 2018	836.7	6.3	87.7412		682.6	5.85	99.8683
#111032	50	982.8	16.4	1050.8	13.1	1193.6	16	Orejana et al., 2015	Stephan et al., 2018	982.8	8.2	82.3391		540.1	3.65	100
#111032	51	674.5	9	673.4	6.9	669.7	8.8	Orejana et al., 2015	Stephan et al., 2018	674.5	4.5	100.717		370.1	3.25	100.027
#111032	52	559.1	15	575.5	13.2	641.8	25.9	Orejana et al., 2015	Stephan et al., 2018	559.1	7.5	87.1144		617.3	4.7	100.049
#111032	53	679.7	9	678	6.9	673.1	8.8	Orejana et al., 2015	Stephan et al., 2018	679.7	4.5	100.981		629	2.4	100.207
#111032	54	686.7	9.1	683.8	7	673.1	8.8	Orejana et al., 2015	Stephan et al., 2018	686.7	4.55	102.021		674.5	4.5	100.717
#111032	55	2289	80.9	2452.5	42.6	2590	23.6	Orejana et al., 2015	Stephan et al., 2018	2590	11.8	88.3784		679.7	4.5	100.981
#111032	56	2026.6	55.7	2301	29.2	2553.9	10.5	Orejana et al., 2015	Stephan et al., 2018	2553.9	5.25	79.3531		579.2	3.35	100.994
#111032	57	487.2	4.7	489.7	5.4	502.1	22.1	Orejana et al., 2015	Stephan et al., 2018	487.2	2.35	97.0325		569.1	3.8	101.191
#111032	58	627.3	12	629.6	9.4	638.3	17.3	Orejana et al., 2015	Stephan et al., 2018	627.3	6	98.2767		610.9	2.9	101.377
#111032	59	585.6	10.1	591.6	9.9	613.4	26	Orejana et al., 2015	Stephan et al., 2018	585.6	5.05	95.4679		563.2	8.1	101.477
#111032	60	606.8	23.2	632	19.8	720.7	25.6	Orejana et al., 2015	Stephan et al., 2018	606.8	11.6	84.1959		582.7	3.35	101.604
#111032	61	595	8	596.7	7.2	602.6	17.4	Orejana et al., 2015	Stephan et al., 2018	595	4	98.7388		617.9	3.55	101.93
#111032	62	337.2	6.6	342.6	5.8	378.4	13.6	Orejana et al., 2015	Stephan et al., 2018	337.2	3.3	89.1121		686.7	4.55	102.021
#111032	63	586.8	11.2	596.2	9	631.2	17.3	Orejana et al., 2015	Stephan et al., 2018	586.8	5.6	92.9658		608.5	2.9	102.2
#111032	65	444	12	450.2	10.2	482.8	17.8	Orejana et al., 2015	Stephan et al., 2018	444	6	91.9635		606.2	5.8	103.078
#111032	67	497.9	10.5	494.5	9.4	478.9	22.2	Orejana et al., 2015	Stephan et al., 2018	497.9	5.25	103.967		474	2.3	103.201
#111032	70	629	4.8	629.3	6.6	627.7	25.9	Orejana et al., 2015	Stephan et al., 2018	629	2.4	100.207		640.7	2.45	103.255
#111032	71	682.6	11.7	683.5	10	683.5	21.5	Orejana et al., 2015	Stephan et al., 2018	682.6	5.85	99.8683		487.8	2.35	103.545
#111032	72	323.7	5.7	328.1	5.6	361.7	18.1	Orejana et al., 2015	Stephan et al., 2018	323.7	2.85	89.4941		497.9	5.25	103.967
#111032	73	633.7	13.3	637.1	11.4	648.8	17.3	Orejana et al., 2015	Stephan et al., 2018	633.7	6.65	97.6726		697.1	3.95	104.091
#111032	74	340.9	8	347.5	7.7	390.8	22.5	Orejana et al., 2015	Stephan et al., 2018	340.9	4	87.2313		649.5	1.85	104.674
#111032	75	474.6	5.5	475.9	6.1	482.8	26.6	Orejana et al., 2015	Stephan et al., 2018	474.6	2.75	98.3016		602.7	4.05	105.092
#111032	77	617.3	5.9	626	8.4	655.8	30.1	Orejana et al., 2015	Stephan et al., 2018	617.3	2.95	94.1293		597.4	3.45	105.529
#111032	78	962.3	10.7	972.9	10	996.3	20.4	Orejana et al., 2015	Stephan et al., 2018	962.3	5.35	96.5874		378.1	3.3	105.762
#111032	79	375	8.7	381.1	8.3	419.3	22.4	Orejana et al., 2015	Stephan et al., 2018	375	4.35	89.4348		588.6	2.25	106.766
#111032	80	509.8	4.9	515.9	5.7	540.1	22	Orejana et al., 2015	Stephan et al., 2018	509.8	2.45	94.3899		683.8	1.95	107.128
#111032	81	608.5	5.8	606.1	7.3	595.4	26.1	Orejana et al., 2015	Stephan et al., 2018	608.5	2.9	102.2		615	3.5	110.811
														#111966	Ediacaran
#111966	1	453.6	7	451.2	11.7	439.4	57.9	Orejana et al., 2015	Stephan et al., 2018	453.6	3.5	103.232		1946.5	37.55	82.9437
#111966	2	496.1	5.7	491.2	5.5	467.2	17.8	Orejana et al., 2015	Stephan et al., 2018	496.1	2.85	106.186		2212.8	15.7	87.9248
#111966	3	665.8	6.3	658.9	7.8	634.7	30.2	Orejana et al., 2015	Stephan et al., 2018	665.8	3.15	104.9		2598.6	11.8	91.8148
#111966	5	1614.5	62.8	1764.9	51.9	1946.5	75.1	Orejana et al., 2015	Stephan et al., 2018	1946.5	37.55	82.9437		692.5	2.65	92.2595
#111966	6	340.3	8.6	340.3	8.7	340.6	36.3	Orejana et al., 2015	Stephan et al., 2018	340.3	4.3	99.9119		2628	11.75	93.9688
#111966	7	835.6	15.7	833.1	23.9	824.4	75.2	Orejana et al., 2015	Stephan et al., 2018	835.6	7.85	101.359		477.6	2.3	96.6019
#111966	8	477.6	4.6	480.5	6.1	494.4	22.1	Orejana et al., 2015	Stephan et al., 2018	477.6	2.3	96.6019		311.5	1.5	97.5877
#111966	9	995.6	11.1	980.4	15.1	944.9	41	Orejana et al., 2015	Stephan et al., 2018	995.6	5.55	105.366		793	3	98.0707
#111966	10	998.9	11.1	998.5	15.3	996.3	40.7	Orejana et al., 2015	Stephan et al., 2018	998.9	5.55	100.261		786.7	2.95	99.6453
#111966	11	1945.6	23.5	2078.8	19.5	2212.8	31.4	Orejana et al., 2015	Stephan et al., 2018	2212.8	15.7	87.9248		340.3	4.3	99.9119
#111966	12	630.8	4.8	625	8.4	602.6	30.4	Orejana et al., 2015	Stephan et al., 2018	630.8	2.4	104.68		998.9	5.55	100.261
#111966	14	466.2	3.6	465.8	7.5	463.2	39.9	Orejana et al., 2015	Stephan et al., 2018	466.2	1.8	100.648		307.2	1.2	100.327
#111966	15	309	9.1	308.1	9	301.9	36.5	Orejana et al., 2015	Stephan et al., 2018	309	4.55	102.352		466.2	1.8	100.648
#111966	16	307.2	2.4	307.1	4.2	306.2	27.4	Orejana et al., 2015	Stephan et al., 2018	307.2	1.2	100.327		567.4	5.45	100.889
#111966	17	786.7	5.9	787.9	7.7	789.5	25.3	Orejana et al., 2015	Stephan et al., 2018	786.7	2.95	99.6453		835.6	7.85	101.359
#111966	18	793	6	797.5	6.7	808.6	21	Orejana et al., 2015	Stephan et al., 2018	793	3	98.0707		578	2.75	102.102
#111966	19	692.5	5.3	706.2	6.1	750.6	21.2	Orejana et al., 2015	Stephan et al., 2018	692.5	2.65	92.2595		309	4.55	102.352
#111966	21	2469.5	28.8	2557.7	18.8	2628	23.5	Orejana et al., 2015	Stephan et al., 2018	2628	11.75	93.9688		453.6	3.5	103.232
#111966	22	2385.9	31.9	2502.9	20.5	2598.6	23.6	Orejana et al., 2015	Stephan et al., 2018	2598.6	11.8	91.8148		630.8	2.4	104.68
#111966	23	605.6	4.6	598.1	5.4	569.8	17.5	Orejana et al., 2015	Stephan et al., 2018	605.6	2.3	106.283		665.8	3.15	104.9
#111966	24	578	5.5	575.6	6.2	566.1	26.2	Orejana et al., 2015	Stephan et al., 2018	578	2.75	102.102		995.6	5.55	105.366
#111966	25	567.4	10.9	566.3	9.6	562.4	26.2	Orejana et al., 2015	Stephan et al., 2018	567.4	5.45	100.889		496.1	2.85	106.186
#111966	26	311.5	3	312.7	6.5	319.2	50	Orejana et al., 2015	Stephan et al., 2018	311.5	1.5	97.5877		605.6	2.3	106.283
														#111967	Ediacaran
#111967	1	585.6	6.7	588.2	8	599	26.1	Orejana et al., 2015	Stephan et al., 2018	585.6	3.35	97.7629		878.5	5.75	84.4224
#111967	3	881.9	8.3	922.4	9.7	1018.6	24.4	Orejana et al., 2015	Stephan et al., 2018	881.9	4.15	86.5796		881.9	4.15	86.5796
#111967	4	930	10.4	925.5	9.7	915.7	20.7	Orejana et al., 2015	Stephan et al., 2018	930	5.2	101.562		1803.5	12.8	87.2858
#111967	5	651.8	7.4	651.3	7.7	648.8	21.6	Orejana et al., 2015	Stephan et al., 2018	651.8	3.7	100.462		647.1	3.1	87.7543
#111967	6	640.7	6.1	638.9	5.7	631.2	17.3	Orejana et al., 2015	Stephan et al., 2018	640.7	3.05	101.505		795.8	5.25	88.6389
#111967	7	608	11.6	607.6	9.2	606.2	17.4	Orejana et al., 2015	Stephan et al., 2018	608	5.8	100.297		2704.6	11.65	89.6953
#111967	8	603.3	8.1	605.9	8.2	613.4	30.3	Orejana et al., 2015	Stephan et al., 2018	603.3	4.05	98.3534		2563.8	13.45	92.3317
#111967	9	991.7	7.4	1002.2	8.9	1024.1	20.4	Orejana et al., 2015	Stephan et al., 2018	991.7	3.7	96.8362		2756.9	24.7	92.5061
#111967	10	591.5	5.7	595.6	6.3	609.8	21.7	Orejana et al., 2015	Stephan et al., 2018	591.5	2.85	96.999		2018.1	3.8	93.3204
#111967	11	755.3	7.1	754.9	7.5	753.8	21.2	Orejana et al., 2015	Stephan et al., 2018	755.3	3.55	100.199		2608.2	11.75	94.3946
#111967	12	617.9	10.6	618.7	11.1	620.5	34.6	Orejana et al., 2015	Stephan et al., 2018	617.9	5.3	99.581		819.2	6.95	96.8207
#111967	13	585.6	7.8	582.8	13.3	569.8	56.6	Orejana et al., 2015	Stephan et al., 2018	585.6	3.9	102.773		991.7	3.7	96.8362
#111967	14	630.8	7.2	630.2	9.4	627.7	34.5	Orejana et al., 2015	Stephan et al., 2018	630.8	3.6	100.494		780.4	5.15	96.896
#111967	15	1009.4	11.2	1013.3	10.3	1021.3	20.4	Orejana et al., 2015	Stephan et al., 2018	1021.3	10.2	98.8348		715	4.05	96.9623
#111967	16	628.5	9.6	627.2	8.4	620.5	17.4	Orejana et al., 2015	Stephan et al., 2018	628.5	4.8	101.289		591.5	2.85	96.999
#111967	17	1049.5	7.8	1058.5	9.2	1075.6	20.2	Orejana et al., 2015	Stephan et al., 2018	1075.6	10.1	97.5734		626.1	4.2	97.0246
#111967	18	757	8.6	759.9	8.6	766.9	25.4	Orejana et al., 2015	Stephan et al., 2018	757	4.3	98.7091		946.2	6.15	97.466
#111967	19	1024.2	13.3	1024.6	11.6	1024.1	24.4	Orejana et al., 2015	Stephan et al., 2018	1024.1	12.2	100.01		1075.6	10.1	97.5734
#111967	20	946.2	12.3	953.6	12.4	970.8	32.7	Orejana et al., 2015	Stephan et al., 2018	946.2	6.15	97.466		585.6	3.35	97.7629
#111967	21	734.6	8.3	730.3	8.3	717.4	25.6	Orejana et al., 2015	Stephan et al., 2018	734.6	4.15	102.398		918.9	6	97.849
#111967	22	1048.9	7.8	1053.2	9.2	1062.2	20.2	Orejana et al., 2015	Stephan et al., 2018	1062.2	10.1	98.7479		921.7	5.15	98.1472
#111967	23	602.7	5.8	600.1	6.4	588.1	21.8	Orejana et al., 2015	Stephan et al., 2018	602.7	2.9	102.483		2173.5	3.8	98.3069
#111967	24	744.4	12.7	741.3	12.6	730.7	34	Orejana et al., 2015	Stephan et al., 2018	744.4	6.35	101.875		603.3	4.05	98.3534
#111967	25	2550.3	21.1	2667.6	30.2	2756.9	49.4	Orejana et al., 2015	Stephan et al., 2018	2756.9	24.7	92.5061		735.2	4.15	98.3808
#111967	26	647.1	6.2	667.5	9.8	737.4	38.2	Orejana et al., 2015	Stephan et al., 2018	647.1	3.1	87.7543		757	4.3	98.7091
#111967	27	734	8.3	728.8	9.4	710.6	25.6	Orejana et al., 2015	Stephan et al., 2018	734	4.15	103.293		1062.2	10.1	98.7479
#111967	28	688.4	7.8	682.8	7	662.8	17.3	Orejana et al., 2015	Stephan et al., 2018	688.4	3.9	103.862		1021.3	10.2	98.8348
#111967	29	735.2	8.3	738.2	8.4	747.3	17	Orejana et al., 2015	Stephan et al., 2018	735.2	4.15	98.3808		655.3	4.35	98.8684
#111967	30	2425.9	24.3	2581.1	16.9	2704.6	23.3	Orejana et al., 2015	Stephan et al., 2018	2704.6	11.65	89.6953		617.9	5.3	99.581
#111967	31	653.6	5	646.3	5.8	620.5	21.7	Orejana et al., 2015	Stephan et al., 2018	653.6	2.5	105.334		789.6	4.45	99.6089
#111967	32	663.4	6.3	654.1	6.8	620.5	17.4	Orejana et al., 2015	Stephan et al., 2018	663.4	3.15	106.914		648.3	4.95	99.9229
#111967	33	715	8.1	720.7	11.4	737.4	38.2	Orejana et al., 2015	Stephan et al., 2018	715	4.05	96.9623		1024.1	12.2	100.01
#111967	36	648.9	5	641	5.7	613.4	17.4	Orejana et al., 2015	Stephan et al., 2018	648.9	2.5	105.787		755.3	3.55	100.199
#111967	37	921.7	10.3	927.5	13.4	939.1	37	Orejana et al., 2015	Stephan et al., 2018	921.7	5.15	98.1472		608	5.8	100.297
#111967	38	593.9	5.7	591.9	6.3	584.5	26.1	Orejana et al., 2015	Stephan et al., 2018	593.9	2.85	101.608		623.2	4.15	100.435
#111967	39	611.5	7	599.8	8.2	555	30.6	Orejana et al., 2015	Stephan et al., 2018	611.5	3.5	110.18		651.8	3.7	100.462
#111967	40	576.8	6.6	574.1	7.9	562.4	30.6	Orejana et al., 2015	Stephan et al., 2018	576.8	3.3	102.56		630.8	3.6	100.494
#111967	41	878.5	11.5	926	15.8	1040.6	40.4	Orejana et al., 2015	Stephan et al., 2018	878.5	5.75	84.4224		744.4	4.9	100.5
#111967	42	641.9	7.3	633	7.5	599	21.7	Orejana et al., 2015	Stephan et al., 2018	641.9	3.65	107.162		606.2	4.05	100.597
#111967	43	700.6	5.3	691.1	7	659.3	25.8	Orejana et al., 2015	Stephan et al., 2018	700.6	2.65	106.264		715	5.4	100.619
#111967	44	595.6	3.4	594	5.4	588.1	21.8	Orejana et al., 2015	Stephan et al., 2018	595.6	1.7	101.275		570.9	3.85	100.848
#111967	45	639	4.9	635.1	7.6	620.5	30.3	Orejana et al., 2015	Stephan et al., 2018	639	2.45	102.981		595.6	1.7	101.275
#111967	46	2462	20.5	2543.6	16.9	2608.2	23.5	Orejana et al., 2015	Stephan et al., 2018	2608.2	11.75	94.3946		628.5	4.8	101.289
#111967	47	2367.2	12	2474.9	16.8	2563.8	26.9	Orejana et al., 2015	Stephan et al., 2018	2563.8	13.45	92.3317		640.7	3.05	101.505
#111967	48	1574.2	22.4	1675.3	18.1	1803.5	25.6	Orejana et al., 2015	Stephan et al., 2018	1803.5	12.8	87.2858		930	5.2	101.562
#111967	50	589.2	9	584.5	11.6	566.1	39.2	Orejana et al., 2015	Stephan et al., 2018	589.2	4.5	104.081		593.9	2.85	101.608
#111967	51	631.4	6	616.8	5.6	562.4	21.9	Orejana et al., 2015	Stephan et al., 2018	631.4	3	112.269		744.4	6.35	101.875
#111967	52	795.8	10.5	823.4	9	897.8	16.6	Orejana et al., 2015	Stephan et al., 2018	795.8	5.25	88.6389		734.6	4.15	102.398
[truncated: 1,656 more rows]
[truncated: 1 more columns]

## Sheet: CIZ_ISOPLOTR_CSV
MS	SC69	SCB3	SCB7	VM21	VM49	VMC25		JG1	SJ1		ZD1	ZD2	ZD4		ALC-1	ALC-2	ALC-3	ALC-4	ALC-5		OD3	OD4		G6	G7		OR1		QAM 1		PO-1	PO-2	PO-3		#108579	#110190	#110194	#111031	#111032	#111966	#111967		PNC-1	PNC-2	PNC-3	PNC-4		GCZ-03	GCZ-06
1789	800	652	354	534	2558	558		734	639		640	585	581		783.7	854.9	2124.9	819.6	566.5		598.5	2516.9		694.8	923.9		926.1		537.2		941.8	932.3	520		669.8	765	3450.8	506.3	456.6	2598.6	2563.8		682.6	783.3	598	596.8		608.5	2500.7
1798	1464	858	622	2652	2981	635		700	968		2232		2269		1928.5	613.7	633.1	756.2	585.4		565.9	961.2		549	596.2		617.8		1863.3		707.5	1908.5	815.8		633.7	2397.8	2403.3	622	889.7	692.5	2756.9		2069.9	608	588.6	627.3		972.9	598
919	608	2453	2166	1861	2647	605		765							652.6	563.1	640	810.2	790.3		934.8	926.9		2704.8	1237.7		864.4		892.5		586.2	974	985.4		617.3	946.8	836.2	576.2	536.6	2628	2018.1		1976.1	655.9	603.3	782.7		593.9	702.9
622	947	2034	1104	733	2112	561		1060							681.6	757.2	674.2	555.5	563.1		579.5	594.4		563.8	650.6		612.3		526.5		1987.8	2625.2	806.7		669.3	1910.1	606.2	789	825.4	477.6	2608.2		647.1	735.7	552.6	814.6		588	679.1
2532	658	1961	2591	603	1930	586		973							898.1	621	1994.1	637.2	556		551.7	897.9		2639.7	696.5		629		587.4		986.2	896.5	958.4		612.7	808.9	927.3	915.5	920	311.5	819.2		2047.7	777	612.1	1992.2		785.6	1875.9
2030	623	2972	532	2198	2611	646		802							840.8	704.3	697.9	615.3	790		2457.4	777.9		521.7	1214.8		672.3		524.7		2611	918.3	2612.9		1088.9	1332.8	2003.7	1054.1	623.8	793	991.7		643.1	676.8	1091.5	1858.6		2042.1	1083.6
1838	565	1940	760	600	906	2715		943							827.3	617.4	588.7	619.8	659.8		2600.5	976.9		783.9	762.1		665		523.5		2690.3	917.2	603.9		1946.5	651.2	618.5	594.5	444	786.7	780.4		606.8	680.3	1995.1	505.7		673.3	991.7
2490	919	1998	975	2664	2044	763		934							761	661.3	590.9	2756.1	860.5		574.6	774.5		2172.7	737.5		854.9		548.4		2074	1796.9	1984.9		317.6	594.5	2107.9	710.4	586.8	340.3	715		1688.8	790.1	1821.6	582.7		2609.1	1099.4
534	1422	1854	1503	2035	1857	618		778							584	947.8	2636.5	952.5	591.7		578.3	594.2		1107.8	1158.7		697.4		531.8		2086.3	2620.4	970.7		331.1	628.5	2611	450.6	617.3	998.9	591.5		795.8	609.1	2645.7	654.1		1161.2	2449.6
1843	554	927	2585	1832	542	590									942.3	625.4	916.2	644.6	634		966.8	796.5		1311.1	916.6		706.3		532.4		780.4	1993.6	2643.8		604.4	1210.8	676.2	425.9	643.6	307.2	626.1		634.9	1893.1	2056.1	618.5		721.3	2596.7
644	559	632	550	1960	564	830									755.8	602.1	640.7	630.3	580.2		627.8	608.7		1124.8	686.1		1836		544.3		2186.3	2641	605		323.1	653	619.7	633.7	509.8	466.2	946.2		627.3	671	559.7	864.4		620.3	639.6
2603	876	628	2617	615	643	895									586.9	570.4	645.6	608.2	2419.3		616.1	538.3		2677	572.1		633.2		2605.3		693.6	990.6	617.9		319.4	612.7	604.4	747.2	614.4	567.4	1075.6		2671.3	654.7	2672.3	671		635.5	631.4
788	577	1967	822	2483	598	620									1956.9	552.7	785.4	590.1	963.2		611	850.7		898.7	675.7		564.8		536		2006.6	680.9	2733.6		317	501.5	689	667.5	585.6	835.6	585.6		749.5	773.6	739.2	769.6		609.1	524.1
2853	609	697	981	1047	2028	773									659.9	609.8	994	622.2	575.2		643.6	676.4		967.9	992.2		829.5		550.2		930.6	1080.9	1107.3		328	770.7	1987.8	961.8	549.6	578	918.9		632	1059.5	1943.5	616.8		635.5	1801.9
1931	587	843	595	1062	977	625									599.6	867.1	2564.5	562.5	953.9		2244.9	568.1		708.7	2153.3		710.4		544.3		715.6	2671.3	857.7		812.3	2442.2	1054.1	352.5	962.3	309	921.7		591.5	947.3	577.4	528.9		614.4	838.4
1068	620	928	633	492	584	2385									697.9	1933.5	2091.7	622.3	836		600.4	776.4		913.8	546.7		642.4		2774.8		2117.3	1051.4	653		331.1	2086.3	696.5	541.3	647.7	453.6	2173.5		582.1	586.2	637.8	533		955.7	1062.2
601	839	669	629	1999	822	588									693.1	622.6	689.1	629.6	1849.1		613.1	2723.9		935.6	1211.2		566.5		524.7		1905.5	603.9			326.8	521.7	708.7	598.6	487.2	630.8	603.3		656.5	1112.5	486.6	577.4		654.7	879.1
632	2136	1486	656	508	998	2080									775.2	581.4	629.4	618.4	2613.7		1912.9	631.9		1123.1	2937		2098		1916.2		1937.4	989.5			323.1	682.6	550.8	639.6	555.5	665.8	735.2		770.7	583.9	502.1	1472.7		625.5	686.1
905	878	1021	649	618	482	626									605.2	760.7	680.4	2371.9	576.8		588.9	575.2		1091.1	1311.7		620.3		2002.3		1891.6	1112.5			1997.9	692.5	791.9	1024.1	369.5	995.6	757		725.4	707.5	494.9	761		805.5	985.6
971	562	1041	357	622	1973	582									598.6	600.8	901.6	2213.7	2486.1		696.9	576.5		1161.2	2775.4		559.7		544.9		961.8	660.5			649.5	631.4	898.2	787.9	633.7	496.1	1062.2		690.7	657	907.7	708.7		2252.2	838.4
664	558	353	785	591	588	628									1946.1	2002.7	2510.7	2531.5	559.6		641.2	630.3		790.7	827.1		648.7		555.5		912.2	2733.6			335.4	836.2	1976.1	608.5	655.3	605.6	1021.3		634.9	789.6	605.6	533		1070.3	831.1
1083	2116	572	476	1040	1081	1907									2772.5	599.1	627	2447.1	1730.7		591.9	759.8		715.6	658.2		925.2		1801.9		829.9	2181.2			633.1	691.3	633.1	375.6	627.3		655.3		754.7	715.6	480	531.8		635.5	2572.6
614	610	711	919	588	761	516									942.5	561.7	597.2	1997.3	1043.3		618.3	596.1		2036.6	736.9		589.7		904.3		790.7	1896.2			588	853.1	585	589.2	474.6		617.9		711	604.4	666.4	1021.3		1368.5	578.6
927	2116	586	1961	618	617	763									621	1900.9	634.4	579.2	1867.5		635	562.2		1978.1	1124.4		574.6		527.1		976.5	672.2			654.1	655.3	1035.1	362.2	516.4		789.6		911.6	991.7	753	984.5		2602.4	656.5
430	2019	1045	1048	591	622	576									2275.3	2317.3	607.7	596.4	595.2		660.5	574		1098.2	1212.9		732.9		521.7		671	1907			555.5	814.1	827.1	525.9	572.1		648.3		656.5	742.1	2821.4	642.5		818	894.2
648	827	618	1976	659	2003	631									2701.1	2003.9	637.3	616.6	2640.9		619.4	580.4		807.8	916.6		704.3		558.5		617.9	2435.8			586.8	726	656.5	445.2	657.6		1024.1		2556.9	797.6	579.2	883		597.4	979.5
1954	586	685	877	964	2051	635									845.8	757.5	2112.7	617.6	596		654.6	594.4		1161.1	904.3		744.4		570.3		592.1	579.2			588.6	601.5	1062.2	534.2	595		755.3		562	812.9	541.3	537.2		2267.9	860.5
2026	617	364	1855	1894	1995	609									3010.9	825.7	591.3	576.2	593.9		607.4	683.5		2554.1	868.9		918.6		542.5		683.8	627.3				814.6	2227.7	550.2	556.7		608		1980.5	562.6	606.8	510.4		1997.9	916.1
987	1874	302	1060	639	709	1883									812.7	577.7	680.3		582.6		633.2	918.5		954.6	1072.4		1922.8		543.7		979	1967.3				510.4	764.4	362.8	581.5		623.2		755.3	2060.2	600.3	615.6		684.4	597.4
362	948	1025	1115	1759	602	599									631.4	726.1	633.5		564		627.5	662.4		1954.4	856.5		870		556.1			850.3				880.2	966.2	586.8	682.6		651.8		2149	731.7	2548	2494.5		1048.7	2042.1
497	585	620	642	2653	596	643									2012.3	571	833.2				628.4	589.1		1058.1	2518.6		589.4					499.7				880.2	596.2	560.9	540.1		630.8		642.5	582.7	632.6	2127.9		921.1	3230.8
929	958	674	997	683	1765	485									2103.7	934.8	833.9				610.6	639		1865.2	1060.4		595.5					912.7				583.9	664	562.6	370.1		744.4		553.2	935.1	1829.7	647.1		1054.1	1875.9
994	622	645	581	985	1047	969									2531.9	1931.1	579.5				567.7	572.6		1107	1073.8		692.3									496.7	1007.5	609.7	617.3		606.2		681.5	804.4	541.9	931.2		2120	655.9
998	1046	785	630	1059	668	651									1930.3	632.8	744.1				613.6	663.3		2093.2	1046.6		614.1									580.9	1007.5	345.1	629		715		759.3	604.4	1765.1	724.8		1070.3	729.4
2070	1894	610	616	645	951	660									2618.5		642.5				941.7	562.2		1090.8	2075.9		683.2									493.1	643.6	362.8	674.5		570.9		640.1	788.4	2552.9	481.2		644.8	960.1
1068	620	569	626	1024	737	717									789.2		1991.1				644.6	647.5		1950.3	595.6		2660.1									672.2	679.1	554.9	679.7		595.6		1932.9	721.9	695.9	822		2401.1	1310.1
641	2294	328	604	1982	469	566									633.3		652.2				740.5	605.1		1341.6	605		575.4									486.6	647.7	363.5	579.2		628.5		797	2506.8	509.2	539		1894.7	612.7
786	915		351	1015	1054	1024									2019.7		581.7				560.8	596.2		1006.4	1093.6		562									741.5	806.1	360.4	569.1		640.7		632	586.2	532.4	590.3		649.5	1032.4
571	2033		1045	758	628	973									586.8		904.4				588.3	639		1964.1	1325.4		633.9									694.2	670.4	620.9	610.9		930		580.3	799.8	543.7	737.5		2110.6	1896.2
2713	971		963	1038	1045	609									1971.9		636				689.5	611.7		1050.4	1084.5		567.5									500.9	772.4	365.9	563.2		593.9		667.5	803.8	658.2	653.6		2600.5	835.6
660	571		1050	746	570	634									682.8						648	676.3		1615.4	1873.1		580.3									788.4	610.9	570.3	582.7		744.4		701.7	1166.2	2146.3	593.3		2653	2612.9
516	584		693	930	685	647									2194.1						603.2	650.7		771.3	1090.1		730.7									728.8	629	339.6	617.9		734.6		2701.9	577.4	659.4	1980.5		1046	717.9
604	1032		614	863	579	577									620.9						573.4	3444.4		2042.1	1039.8		639.7									659.4	777.6	728.3	686.7		664.6		717.3	1125.5	610.9	679.1		1013	579.7
1050	614		972	691	822	702									641.2						2193.5	555.3		1117.2	708.1		2488									779.3	975.1	348.8	608.5		602.7		653.6	668.7	679.1	676.2		1032.4	2647.5
883	1022		1016	847	640	603									818.4						612.3	2940.4		855.4	1991.8		600.3									589.2	996.3	671.6	606.2		742.6		797.6	712.7	627.3	643.6		1950.9	1001.9
681	863		592	1862	602	646									634.8						593.6	619.1		2139.1	1132		2668.3									742.1	610.9	425.9	474		576.8		675.1	745.5	552	841.8		1135.8	1990.7
605	608		1023	639	728	2620									732.5						585.6	587.2		2029	1047.9		566.6										939	657.6	640.7		669.8		3249.6	1046	484.2	639		715.6	999.4
453	686		702	622	1885	1066									2680.5						657.8	1075.7		1055.5	2622.5		840.2										2006.6	647.1	487.8		669.8		791.3	614.4	533.6	591.5		636.6	2181.2
1032	628		607	733	972	622									971.7						674.3	736.6		1937.9	1051.3		570.8										629	668.1	497.9		648.3		629	785	488.4	857.1		962.3	952.9
933	670		613	683	625	804									634.4						632.9	1077.5		1057.1	724.2		597.3										907.7	558.5	697.1		585.6		661.1	753.5	572.7	506.3		629.6	661.7
986	616		588	602	695	577									605.6						613.3	594.9		1994.5	1025		829										708.7	347.6	649.5		639		744.9	751.3	658.8			920	529.5
2047	975		1024	596	604	872									627.7						596.4	895		799.3	923.9		2507.5										653		602.7		606.8		712.1	802.7	509.8			923.9	686.7
995	571		541	488	757	590									674.4						552	647.5		643.6	1088.1		882.7										592.1		597.4		647.7		678.6	627.9	595.6			1046	1026.9
619	614		683	541	625	829									623.9						660.6	887		1199.7	2035.3		1498										615.6		378.1		734		577.4	1040.6	680.9			962.3	1974.6
649	793		981	589	677	786									642.1						774.7	623.1		699.4	2625.3		565.5										631.4		588.6		608		1931.4	987.3	522.3			3427.6	1891.6
654	633		666		620	624									827.1						708.1	824.6		1871.7	599.7		831.7										769		683.8		606.8		3471.1	781	736.3			663.4	2063
636	695		643		588	605									574.9						780.7	713.3		2637.6	705.8		560.9										983.4				688.4		899.8	1980.5	600.9			1866.5	608.5
1016	642		723		648	664									619.1						978.9	1155.5		2108.5	1080.6		640.3										548.4				589.2		773.6	937.9	522.9			650.1	634.3
621	622		1052		843	849									653.3						1037.2	2506.3		1964.1	1345.6		561.9										613.2				573.8		603.9	1128	579.2			646.6	644.2
1695	592		636		647	677									579.4						767.7	606.4		2025	2656		685.8														789		643.1	827.1	576.2			629.6	753.5
975	838		824		690	769									1080.5						600.7	629.7		1870.3	2055.1		844.5														589.2		715	616.8	590.9			2003.7	985
622	969		1029		582	536															2134.1	657.1		2551.4	1066.5		1001.9														589.7		549.6	678.6	489.6			676.8	1051.4
742	732		941		573	642															611.2	584.4		1564.5	1056.9		621.1														618.5		593.9	659.4	536			985	1983.4
737	642		586		628	613															595.2	2181.1		2037.4	748.4		825.6														664.6		758.7	647.7	599.7			664.6	590.9
497	578		1024		600	645															1757.8	669.1		2111.7	2609.2		2467														653.6		749	650.6	2402.2			676.2	624.4
637	598		646		572	714															648	956.8		693.6	1008.3		627.3														590.9		913.8	650.6	643.6			684.4	922.8
1026	559		363		823	975															764.5	2336.2		1092.9	777.6		2063														648.9		561.4	570.3	597.4			677.4	822
715	642		594		584	643															840.9	642.5		981.9	1526.4		2009.8														993.5		1135.8	604.4	571.5			1997.9	2655.8
972	665		585		645	783															1015.7	815.2		1991.8	1263.6		675														707.5		675.7	637.8	688.4			612.1	942.3
461	584		483		868	536															697.5	590.4		931.7	643.1		634.6														700.6		686.1	722.5	606.2			689.6	849.7
613	576		707		737	698															875.1	888		1877.9	2389		614.8														663.4		686.1	673.9	2030.8			970.8	1051.4
981	599		687		612	619															900.4	717.1		1885.5	687.8		636.4														641.9		833.3	2544	512.8			975.6	982.2
777	572		586			593															2466.4	613.2		2070.3	1071.3		2047.4														613.2		2142.4	616.8	2087.7			648.3	1051.4
513	615		563			558															2025.5	592.5		1952.6	1041.4		619.7														605.6		683.8	1914.7	1897.8			990.7	1072.9
572	609		755			608															604.4	838.1		1034.8	2652.9																815.2		1051.4	2235.1	581.5			620.3	1029.6
663	622		687			654															574.1	2825.9		2007	2109.7																608.5		819.2	1717	2072.6			1059.5	1024.1
680	671		635			745															611.6	656		2048	1021.7																570.3		1035.1	815.2	574.4			1032.4	965.1
643	643		836			684															950.7	545.5		683.8	996																696.5		781.6	631.4	689			671	1001.9
628	593		613			664															1058.2	2197.8		824.3	1909.8																		2566.7	715.6	664			682.6	985
	629		574			2044															564.2	603.3		1052.9	1309																		560.9	1708.2	2156.8			693.6	721.3
			487			617															730.6	867.5		2001.7	1929.8																		630.2	584.5	661.1			788.4	645.4
						818															1616.6	963.6		970	677.4																		728.8	682	491.9			993.5	962.2
						671															624.6	1953.2		2094	676.8																		2698.4	3351	582.7			1839.4	985
						942															629.1	660.5		988.5	1948.8																		692.5	806.7	726			976.5	630.2
						592															631.3	564.6		1916.6	2610.2																		765	647.1	2097.2			626.1	1004.7
						626															593	617.5		675.1	1003.2																		1956.9	787.9	557.3			707.5	712.7
						497															1967.2	672.7		2651.6	2636																		2012.3	824.8	1678			634.9	646.6
						588															661.4	649.7		737.5	1971.2																		2168.4	2581.3	634.9			608.5	1015.8
						600															894.9	588.4		658.2	2153.6																		696.5	633.7	559.1			1024.1	853.7
						599															647.8	661.2		692.5	1029																		2151.6	1940.5	2033.7			2640.1	768.4
						775															548.2	655.6		906																			711	913.3	2533.1			972.9	696.5
						636															665.5	641.5		874.6																			666.4	729.4	500.9			605.6	709.8
						961															664.9	687.1		721.9																			677.4	1956.9	604.4			651.8	676.8
						542															1095.6	804.7		1958.3																			712.7	711.5	1893.1			651.8	1004.7
						728															601.9	616.6		1981.8																			707.5	2660.4	1931.4			1004.7	761.6
																					605.8	579.2		845.2																			1249.4	864.4	578.6			606.8	2665.9
																					1346.9	683		1985.2																			673.9	696.5	639			960.1	613.2
																					1050.8	2044.2		2649.7																			571.5	2013.8	746.7			1029.6	682
																					600.4	866.5		1064.9																			686.1	845.2	655.3			662.9	748.4
																					607.7	3237.7		1054.6																			2514.9		609.1			663.4	679.1
																					3163.8	2417.4																					591.5		585.6			617.9	1067.6
																					636.6	2036																					1931.4		582.7			708.7	1001.9
																					626	2452.7																					665.2		587.4			654.1	956.5
																					694	2435.9																					651.2		650.6			990.7	886.9
																					599.3	1963.6																					629		798.1			750.7	823.1
																					649.4	619.7																					3266.4		671			610.3	763.9
																					627.1	618.9																					2263.1		609.1			926.7	1026.9
																					650.4	648.8																					754.7		596.2			618.5	2636.4
																					2022.2	849.6																					661.7		597.4			921.1	1078.3
																					686.7	681.6																					2933.1		637.8			599.2	1929.9
																					719.4	566.5																							570.3			592.7	835.6
																					682.1	591																							613.8			751.8	1010.3
																					942.9	922.2																										679.1	713.9
																					643	686.8																										694.2	947.8
																					1236.5	573.3																										656.5	661.1
																					2238.3	959.8																										675.7	1942
																					978.7	633.4																										732.9	689.6
																					662.9	707.9																										663.4	1018.6
																					616.5	819.4																										708.7	1007.5
																					675.2	1960.1																										991.1	671.6
																					762.4	796																										700	537.8
																					639.8	642.1																										944.9
																					646.6	1005.6
																					592.5	2639
																					706.3	653.3
																					689.6	553.3
																					709.8	669.6
																					824	697.6
																					2396.7	624.8
																					977.9	656
																					733.5	936.7
																					802.7	616.5
																					836.2	809
																					1095.2	2243.4
																					670.4	667.1
																					666.5	935.5
																					762.6	658.2
																					763.5	2647.4
																					2665.4	2597.4
																					608.3	603.3
																					723.9	1976.9
																						722.7
																						2014
																						938.3
																						629.2
																						2056.6
																						597.1
																						647.3
																						971.8
																						1061.1
																						634.3
																						636
																						839.5
																						674.8
																						999.1
																						651.1
																						620.4
																						1060
																						674.6
																						597.3
																						798.4
																						2461.4
																						584.6
																						744.9
																						617.5
																						627.7
																						670.5
																						1002.7
																						647.9
																						735.5
																						690.6
																						581.7
																						817.6
																						660.8
																						612.4
																						644.2
																						999.4
																						616.7
																						662.2
																						910.6
																						615.6
																						574
																						703
																						681.3
																						609.8
																						568
																						862.8
																						798.8
																						676.5
																						681.3
																						767.3
																						664.9
																						620.8
																						967.5
																						672.3
																						602.9
																						708.5
[truncated: 30 more columns]

## Sheet: GTMZ
SAMPLE	GRAIN	Age_238U	Err_238U	Age_235U	Err_235U	Age_206Pb	Err_206Pb	ORIGINAL REF	REFERENCE	SELECTED	1S	CONC%	TO ISOPLOT-R	AGE	1S	CONC%
														OS1
OS1	OS1-ap06rim	484	10	491	11	522	28	Fernandez-Suarez et al., 2003	Puetz et al., 2018	484	5	92.7203		365	5	73.5887
OS1	OS1-ap16b05	534	7	537	8	548	26	Fernandez-Suarez et al., 2003	Puetz et al., 2018	534	3.5	97.4453		492	8.5	80.6557
OS1	OS1-ap16b06	2131	41	2317	27	2484	20	Fernandez-Suarez et al., 2003	Puetz et al., 2018	2484	10	85.789		2124	4	82.9096
OS1	OS1-ap16b07	2205	21	2137	12	2070	16	Fernandez-Suarez et al., 2003	Puetz et al., 2018	2070	8	106.522		508	5.5	83.8284
OS1	OS1-ap16b09	557	18	550	12	520	62	Fernandez-Suarez et al., 2003	Puetz et al., 2018	557	9	107.115		451	4	85.0943
OS1	OS1-ap16b10	587	13	566	9	484	34	Fernandez-Suarez et al., 2003	Puetz et al., 2018	587	6.5	121.281		447	7.5	85.3053
OS1	OS1-ap16b11	570	10	558	9	506	42	Fernandez-Suarez et al., 2003	Puetz et al., 2018	570	5	112.648		2484	10	85.789
OS1	OS1-ap16b12	556	11	540	11	472	50	Fernandez-Suarez et al., 2003	Puetz et al., 2018	556	5.5	117.797		503	6.5	88.5563
OS1	OS1-ap16b13	1958	32	1994	13	2030	20	Fernandez-Suarez et al., 2003	Puetz et al., 2018	2030	10	96.4532		529	5	88.7584
OS1	OS1-ap16b14	563	12	560	9	546	50	Fernandez-Suarez et al., 2003	Puetz et al., 2018	563	6	103.114		2054	10	88.8023
OS1	OS1-ap16b16	499	5	496	6	480	24	Fernandez-Suarez et al., 2003	Puetz et al., 2018	499	2.5	103.958		484	5.5	90.2985
OS1	OS1-ap17b05	554	8	549	8	526	34	Fernandez-Suarez et al., 2003	Puetz et al., 2018	554	4	105.323		553	3.5	91.5563
OS1	OS1-ap17b06	547	8	549	8	558	66	Fernandez-Suarez et al., 2003	Puetz et al., 2018	547	4	98.0287		514	7.5	92.446
OS1	OS1-ap17b07	558	10	553	7	534	40	Fernandez-Suarez et al., 2003	Puetz et al., 2018	558	5	104.494		484	5	92.7203
OS1	OS1-ap17b10	557	12	563	10	586	80	Fernandez-Suarez et al., 2003	Puetz et al., 2018	557	6	95.0512		498	6.5	92.9104
OS1	OS1-ap17b11	553	7	564	9	604	42	Fernandez-Suarez et al., 2003	Puetz et al., 2018	553	3.5	91.5563		545	4	93.6426
OS1	OS1-ap17b12	574	14	577	11	586	56	Fernandez-Suarez et al., 2003	Puetz et al., 2018	574	7	97.9522		557	6	95.0512
OS1	OS1-ap17b13	569	11	559	10	518	28	Fernandez-Suarez et al., 2003	Puetz et al., 2018	569	5.5	109.846		2076	6	96.0501
OS1	OS1-ap17b14	522	15	525	9	538	26	Fernandez-Suarez et al., 2003	Puetz et al., 2018	522	7.5	97.026		2030	10	96.4532
OS1	OS1-ap17b15	451	8	464	9	530	40	Fernandez-Suarez et al., 2003	Puetz et al., 2018	451	4	85.0943		522	7.5	97.026
OS1	OS1-ap18b05	508	11	526	11	606	44	Fernandez-Suarez et al., 2003	Puetz et al., 2018	508	5.5	83.8284		534	3.5	97.4453
OS1	OS1-ap18b08	529	10	542	11	596	46	Fernandez-Suarez et al., 2003	Puetz et al., 2018	529	5	88.7584		574	7	97.9522
OS1	OS1-ap18b09	498	13	505	11	536	22	Fernandez-Suarez et al., 2003	Puetz et al., 2018	498	6.5	92.9104		547	4	98.0287
OS1	OS1-ap18b12	1761	47	1934	24	2124	8	Fernandez-Suarez et al., 2003	Puetz et al., 2018	2124	4	82.9096		512	8	101.992
OS1	OS1-ap18b14	492	17	513	16	610	36	Fernandez-Suarez et al., 2003	Puetz et al., 2018	492	8.5	80.6557		532	4	102.703
OS1	OS1-ap18b15	532	8	530	8	518	38	Fernandez-Suarez et al., 2003	Puetz et al., 2018	532	4	102.703		563	6	103.114
OS1	OS1-ap19b05	1824	34	1935	24	2054	20	Fernandez-Suarez et al., 2003	Puetz et al., 2018	2054	10	88.8023		499	2.5	103.958
OS1	OS1-ap19b07	545	8	552	6	582	26	Fernandez-Suarez et al., 2003	Puetz et al., 2018	545	4	93.6426		558	5	104.494
OS1	OS1-ap19b08	514	15	522	9	556	56	Fernandez-Suarez et al., 2003	Puetz et al., 2018	514	7.5	92.446		554	4	105.323
OS1	OS1-ap19b09	2240	54	2103	16	1970	36	Fernandez-Suarez et al., 2003	Puetz et al., 2018	1970	18	113.706		2070	8	106.522
OS1	OS1-ap19b10	484	11	494	9	536	32	Fernandez-Suarez et al., 2003	Puetz et al., 2018	484	5.5	90.2985		557	9	107.115
OS1	OS1-ap19b11	503	13	515	11	568	46	Fernandez-Suarez et al., 2003	Puetz et al., 2018	503	6.5	88.5563		569	5.5	109.846
OS1	OS1-ap19b12	447	15	460	14	524	20	Fernandez-Suarez et al., 2003	Puetz et al., 2018	447	7.5	85.3053		570	5	112.648
OS1	OS1-ap19b13	512	16	510	9	502	62	Fernandez-Suarez et al., 2003	Puetz et al., 2018	512	8	101.992		1970	18	113.706
OS1	OS1-ap19b14	1994	23	2035	12	2076	12	Fernandez-Suarez et al., 2003	Puetz et al., 2018	2076	6	96.0501		556	5.5	117.797
OS1	OS1-ap19b16	365	10	383	8	496	16	Fernandez-Suarez et al., 2003	Puetz et al., 2018	365	5	73.5887		587	6.5	121.281
														OS2
OS2	OS2-ap16a05	531	7	520	8	468	36	Fernandez-Suarez et al., 2003	Puetz et al., 2018	531	3.5	113.462		319	4	58.6397
OS2	OS2-ap16a06	2040	28	2046	18	2048	26	Fernandez-Suarez et al., 2003	Puetz et al., 2018	2048	13	99.6094		357	2	66.8539
OS2	OS2-ap16a07	481	21	495	17	560	28	Fernandez-Suarez et al., 2003	Puetz et al., 2018	481	10.5	85.8929		386	2.5	67.2474
OS2	OS2-ap16a08	2506	49	2486	13	2466	34	Fernandez-Suarez et al., 2003	Puetz et al., 2018	2466	17	101.622		354	1.5	69.1406
OS2	OS2-ap16a09	416	10	426	10	480	34	Fernandez-Suarez et al., 2003	Puetz et al., 2018	416	5	86.6667		426	6	73.1959
OS2	OS2-ap16a10	435	8	454	7	550	18	Fernandez-Suarez et al., 2003	Puetz et al., 2018	435	4	79.0909		435	4	79.0909
OS2	OS2-ap16a12	614	9	603	9	558	32	Fernandez-Suarez et al., 2003	Puetz et al., 2018	614	4.5	110.036		2046	13	79.6188
OS2	OS2-ap16a13	2434	36	2218	15	2022	26	Fernandez-Suarez et al., 2003	Puetz et al., 2018	2022	13	120.376		448	7	80.8664
OS2	OS2-ap17a05	1629	35	1821	21	2046	26	Fernandez-Suarez et al., 2003	Puetz et al., 2018	2046	13	79.6188		403	3.5	82.2449
OS2	OS2-ap17a06	524	5	524	6	522	28	Fernandez-Suarez et al., 2003	Puetz et al., 2018	524	2.5	100.383		458	6.5	83.8828
OS2	OS2-ap17a07	507	11	519	8	564	32	Fernandez-Suarez et al., 2003	Puetz et al., 2018	507	5.5	89.8936		2060	22	84.2233
OS2	OS2-ap17a08	1735	36	1889	41	2060	44	Fernandez-Suarez et al., 2003	Puetz et al., 2018	2060	22	84.2233		469	3.5	84.3525
OS2	OS2-ap17a09	541	10	541	7	534	34	Fernandez-Suarez et al., 2003	Puetz et al., 2018	541	5	101.311		2458	10	84.8657
OS2	OS2-ap17a11	481	16	493	10	546	48	Fernandez-Suarez et al., 2003	Puetz et al., 2018	481	8	88.0952		484	5.5	84.9123
OS2	OS2-ap17a12	476	12	490	12	554	28	Fernandez-Suarez et al., 2003	Puetz et al., 2018	476	6	85.9206		484	4	85.2113
OS2	OS2-ap17a13	549	8	558	7	588	28	Fernandez-Suarez et al., 2003	Puetz et al., 2018	549	4	93.3673		454	6.5	85.3383
OS2	OS2-ap17a14	547	12	545	11	530	64	Fernandez-Suarez et al., 2003	Puetz et al., 2018	547	6	103.208		481	10.5	85.8929
OS2	OS2-ap17a15	609	12	608	8	598	34	Fernandez-Suarez et al., 2003	Puetz et al., 2018	609	6	101.839		476	6	85.9206
OS2	OS2-ap17a16	527	13	531	13	548	42	Fernandez-Suarez et al., 2003	Puetz et al., 2018	527	6.5	96.1679		416	5	86.6667
OS2	OS2-ap18a05	484	8	499	6	568	20	Fernandez-Suarez et al., 2003	Puetz et al., 2018	484	4	85.2113		481	8	88.0952
OS2	OS2-ap18a06	506	8	517	8	560	28	Fernandez-Suarez et al., 2003	Puetz et al., 2018	506	4	90.3571		507	5.5	89.8936
OS2	OS2-ap18a07	469	7	484	8	556	38	Fernandez-Suarez et al., 2003	Puetz et al., 2018	469	3.5	84.3525		484	8	90.2985
OS2	OS2-ap18a09	386	5	414	5	574	42	Fernandez-Suarez et al., 2003	Puetz et al., 2018	386	2.5	67.2474		506	4	90.3571
OS2	OS2-ap18a10	454	13	468	16	532	54	Fernandez-Suarez et al., 2003	Puetz et al., 2018	454	6.5	85.3383		2154	12	91.4578
OS2	OS2-ap18a11	426	12	452	11	582	26	Fernandez-Suarez et al., 2003	Puetz et al., 2018	426	6	73.1959		459	3	91.8
OS2	OS2-ap18a12	484	11	500	11	570	42	Fernandez-Suarez et al., 2003	Puetz et al., 2018	484	5.5	84.9123		2110	9	91.9905
OS2	OS2-ap18a13	2086	27	2281	20	2458	20	Fernandez-Suarez et al., 2003	Puetz et al., 2018	2458	10	84.8657		2056	10	92.2179
OS2	OS2-ap18a16	491	9	489	8	476	34	Fernandez-Suarez et al., 2003	Puetz et al., 2018	491	4.5	103.151		492	3	93.1818
OS2	OS2-ap19a05	354	3	376	3	512	12	Fernandez-Suarez et al., 2003	Puetz et al., 2018	354	1.5	69.1406		549	4	93.3673
OS2	OS2-ap19a06	496	10	501	7	520	38	Fernandez-Suarez et al., 2003	Puetz et al., 2018	496	5	95.3846		496	5	95.3846
OS2	OS2-ap19a07	535	8	534	7	534	40	Fernandez-Suarez et al., 2003	Puetz et al., 2018	535	4	100.187		527	6.5	96.1679
OS2	OS2-ap19a08	1941	24	2025	9	2110	18	Fernandez-Suarez et al., 2003	Puetz et al., 2018	2110	9	91.9905		528	5	97.417
OS2	OS2-ap19a09	357	4	381	4	534	16	Fernandez-Suarez et al., 2003	Puetz et al., 2018	357	2	66.8539		561	3.5	98.0769
OS2	OS2-ap19a10	484	5	483	4	478	24	Fernandez-Suarez et al., 2003	Puetz et al., 2018	484	2.5	101.255		571	7.5	98.7889
OS2	OS2-ap19a11	1896	21	1974	11	2056	20	Fernandez-Suarez et al., 2003	Puetz et al., 2018	2056	10	92.2179		2048	13	99.6094
OS2	OS2-ap19a12	458	13	473	13	546	32	Fernandez-Suarez et al., 2003	Puetz et al., 2018	458	6.5	83.8828		520	9.5	100
OS2	OS2-ap19a13	448	14	466	12	554	26	Fernandez-Suarez et al., 2003	Puetz et al., 2018	448	7	80.8664		518	5.5	100
OS2	OS2-ap19a15	459	6	466	6	500	26	Fernandez-Suarez et al., 2003	Puetz et al., 2018	459	3	91.8		535	4	100.187
OS2	OS2-ap19a16	577	10	565	7	516	52	Fernandez-Suarez et al., 2003	Puetz et al., 2018	577	5	111.822		524	2.5	100.383
OS2	OS2-ap20a06	520	19	520	13	520	74	Fernandez-Suarez et al., 2003	Puetz et al., 2018	520	9.5	100		484	2.5	101.255
OS2	OS2-ap20a07	518	11	518	12	518	44	Fernandez-Suarez et al., 2003	Puetz et al., 2018	518	5.5	100		541	5	101.311
OS2	OS2-ap20a08	1970	40	2062	23	2154	24	Fernandez-Suarez et al., 2003	Puetz et al., 2018	2154	12	91.4578		2466	17	101.622
OS2	OS2-ap20a09	571	15	573	17	578	82	Fernandez-Suarez et al., 2003	Puetz et al., 2018	571	7.5	98.7889		609	6	101.839
OS2	OS2-ap20a10	528	10	531	8	542	34	Fernandez-Suarez et al., 2003	Puetz et al., 2018	528	5	97.417		491	4.5	103.151
OS2	OS2-ap20a11	319	8	348	5	544	26	Fernandez-Suarez et al., 2003	Puetz et al., 2018	319	4	58.6397		547	6	103.208
OS2	OS2-ap20a12	403	7	417	12	490	76	Fernandez-Suarez et al., 2003	Puetz et al., 2018	403	3.5	82.2449		614	4.5	110.036
OS2	OS2-ap20a13	492	6	499	7	528	24	Fernandez-Suarez et al., 2003	Puetz et al., 2018	492	3	93.1818		577	5	111.822
OS2	OS2-ap20a14	484	16	493	12	536	42	Fernandez-Suarez et al., 2003	Puetz et al., 2018	484	8	90.2985		531	3.5	113.462
OS2	OS2-ap20a15	561	7	563	5	572	30	Fernandez-Suarez et al., 2003	Puetz et al., 2018	561	3.5	98.0769		2022	13	120.376
														CER-G-3
CER-G-3	CER-G-3-01	1648	44	1704	27	1772	23	Díez Fernández et al., 2013	Puetz et al., 2018	1772	11.5	93.0023		408	15	26.037
CER-G-3	CER-G-3-02	567	16	587	13	665	20	Díez Fernández et al., 2013	Puetz et al., 2018	567	8	85.2632		627	21	35.7062
CER-G-3	CER-G-3-03	1236	71	1535	49	1974	11	Díez Fernández et al., 2013	Puetz et al., 2018	1974	5.5	62.614		442	15	38.0379
CER-G-3	CER-G-3-04	2052	47	2082	24	2112	8	Díez Fernández et al., 2013	Puetz et al., 2018	2112	4	97.1591		426	6.5	38.2063
CER-G-3	CER-G-3-05	541	17	556	15	619	29	Díez Fernández et al., 2013	Puetz et al., 2018	541	8.5	87.399		603	13.5	38.3588
CER-G-3	CER-G-3-06	1551	223	1902	137	2310	44	Díez Fernández et al., 2013	Puetz et al., 2018	2310	22	67.1429		629	21	39.6845
CER-G-3	CER-G-3-07	427	20	497	22	833	59	Díez Fernández et al., 2013	Puetz et al., 2018	427	10	51.2605		628	6	46.4841
CER-G-3	CER-G-3-08	2222	92	2279	45	2332	17	Díez Fernández et al., 2013	Puetz et al., 2018	2332	8.5	95.283		467	8	48.3437
CER-G-3	CER-G-3-09	1706	34	1840	19	1994	8	Díez Fernández et al., 2013	Puetz et al., 2018	1994	4	85.5567		525	13	48.7918
CER-G-3	CER-G-3-10	593	15	616	13	702	22	Díez Fernández et al., 2013	Puetz et al., 2018	593	7.5	84.4729		644	11.5	49.6914
CER-G-3	CER-G-3-100	644	51	695	43	861	52	Díez Fernández et al., 2013	Puetz et al., 2018	644	25.5	74.7967		468	4	49.7872
CER-G-3	CER-G-3-101	584	20	585	16	587	12	Díez Fernández et al., 2013	Puetz et al., 2018	584	10	99.4889		486	18	51.1041
CER-G-3	CER-G-3-102	561	25	560	20	559	13	Díez Fernández et al., 2013	Puetz et al., 2018	561	12.5	100.358		427	10	51.2605
CER-G-3	CER-G-3-103	2019	75	2033	38	2047	7	Díez Fernández et al., 2013	Puetz et al., 2018	2047	3.5	98.6321		960	20	53.7514
CER-G-3	CER-G-3-104	442	30	579	37	1162	94	Díez Fernández et al., 2013	Puetz et al., 2018	442	15	38.0379		732	14	55.5809
CER-G-3	CER-G-3-105	621	27	618	21	605	14	Díez Fernández et al., 2013	Puetz et al., 2018	621	13.5	102.645		500	9	57.2738
CER-G-3	CER-G-3-106	584	34	607	34	693	91	Díez Fernández et al., 2013	Puetz et al., 2018	584	17	84.2713		578	8	57.5124
CER-G-3	CER-G-3-107	2047	95	2052	48	2057	7	Díez Fernández et al., 2013	Puetz et al., 2018	2057	3.5	99.5139		479	8	58.0606
CER-G-3	CER-G-3-108	618	24	620	20	631	25	Díez Fernández et al., 2013	Puetz et al., 2018	618	12	97.9398		477	9	58.6716
CER-G-3	CER-G-3-109	1142	48	1144	31	1149	10	Díez Fernández et al., 2013	Puetz et al., 2018	1149	5	99.3908		3013	288	59.1437
CER-G-3	CER-G-3-11	532	20	579	22	767	62	Díez Fernández et al., 2013	Puetz et al., 2018	532	10	69.3611		1961	50.5	59.5105
CER-G-3	CER-G-3-110	597	32	599	26	609	9	Díez Fernández et al., 2013	Puetz et al., 2018	597	16	98.0296		1974	5.5	62.614
CER-G-3	CER-G-3-111	745	21	757	18	792	28	Díez Fernández et al., 2013	Puetz et al., 2018	745	10.5	94.0657		596	14	64.2934
CER-G-3	CER-G-3-112	644	23	809	54	1296	178	Díez Fernández et al., 2013	Puetz et al., 2018	644	11.5	49.6914		2310	22	67.1429
CER-G-3	CER-G-3-113	671	35	679	27	706	12	Díez Fernández et al., 2013	Puetz et al., 2018	671	17.5	95.0425		496	5.5	68.9847
CER-G-3	CER-G-3-114	587	14	603	12	660	21	Díez Fernández et al., 2013	Puetz et al., 2018	587	7	88.9394		532	10	69.3611
CER-G-3	CER-G-3-115	979	32	1019	34	1105	82	Díez Fernández et al., 2013	Puetz et al., 2018	979	16	88.5973		516	5	71.5673
CER-G-3	CER-G-3-116	500	18	572	18	873	34	Díez Fernández et al., 2013	Puetz et al., 2018	500	9	57.2738		565	10.5	72.9032
CER-G-3	CER-G-3-117	2142	54	2190	28	2235	17	Díez Fernández et al., 2013	Puetz et al., 2018	2235	8.5	95.8389		1945	6	73.4704
CER-G-3	CER-G-3-118	1907	64	1989	34	2075	10	Díez Fernández et al., 2013	Puetz et al., 2018	2075	5	91.9036		855	14	74.3478
CER-G-3	CER-G-3-119	574	24	578	19	595	8	Díez Fernández et al., 2013	Puetz et al., 2018	574	12	96.4706		644	25.5	74.7967
CER-G-3	CER-G-3-12	628	12	810	59	1351	203	Díez Fernández et al., 2013	Puetz et al., 2018	628	6	46.4841		596	10.5	76.4103
CER-G-3	CER-G-3-120	606	43	629	40	713	91	Díez Fernández et al., 2013	Puetz et al., 2018	606	21.5	84.993		644	20.5	76.6667
CER-G-3	CER-G-3-13	583	15	595	13	645	15	Díez Fernández et al., 2013	Puetz et al., 2018	583	7.5	90.3876		576	7	77.5236
CER-G-3	CER-G-3-14	2025	79	2093	40	2161	10	Díez Fernández et al., 2013	Puetz et al., 2018	2161	5	93.7066		643	14	79.1872
CER-G-3	CER-G-3-15	522	13	541	11	622	16	Díez Fernández et al., 2013	Puetz et al., 2018	522	6.5	83.9228		612	16.5	81.2749
CER-G-3	CER-G-3-16	525	26	642	33	1076	99	Díez Fernández et al., 2013	Puetz et al., 2018	525	13	48.7918		609	14	81.3084
CER-G-3	CER-G-3-17	599	19	615	16	673	18	Díez Fernández et al., 2013	Puetz et al., 2018	599	9.5	89.0045		619	11.5	82.6435
CER-G-3	CER-G-3-18	2102	64	2164	32	2223	7	Díez Fernández et al., 2013	Puetz et al., 2018	2223	3.5	94.5569		577	7	82.7834
CER-G-3	CER-G-3-19	596	16	611	14	665	25	Díez Fernández et al., 2013	Puetz et al., 2018	596	8	89.6241		681	9	83.7638
CER-G-3	CER-G-3-20	2748	90	2931	39	3059	8	Díez Fernández et al., 2013	Puetz et al., 2018	3059	4	89.8333		571	12	83.8473
CER-G-3	CER-G-3-21	2982	88	3022	36	3048	6	Díez Fernández et al., 2013	Puetz et al., 2018	3048	3	97.8346		522	6.5	83.9228
CER-G-3	CER-G-3-22	960	40	1248	36	1786	45	Díez Fernández et al., 2013	Puetz et al., 2018	960	20	53.7514		584	17	84.2713
CER-G-3	CER-G-3-23	1951	74	2018	39	2088	10	Díez Fernández et al., 2013	Puetz et al., 2018	2088	5	93.4387		593	7.5	84.4729
CER-G-3	CER-G-3-24	2070	103	2121	52	2172	7	Díez Fernández et al., 2013	Puetz et al., 2018	2172	3.5	95.3039		606	21.5	84.993
CER-G-3	CER-G-3-25	408	30	638	41	1567	80	Díez Fernández et al., 2013	Puetz et al., 2018	408	15	26.037		2875	4.5	85.0087
CER-G-3	CER-G-3-26	855	28	942	24	1150	36	Díez Fernández et al., 2013	Puetz et al., 2018	855	14	74.3478		567	8	85.2632
CER-G-3	CER-G-3-27	2571	53	2633	24	2682	8	Díez Fernández et al., 2013	Puetz et al., 2018	2682	4	95.8613		671	13.5	85.369
CER-G-3	CER-G-3-28	1782	333	2422	354	3013	576	Díez Fernández et al., 2013	Puetz et al., 2018	3013	288	59.1437		1994	4	85.5567
CER-G-3	CER-G-3-29	2629	59	2747	26	2835	7	Díez Fernández et al., 2013	Puetz et al., 2018	2835	3.5	92.7337		2174	33	85.7866
CER-G-3	CER-G-3-30	577	14	602	13	697	26	Díez Fernández et al., 2013	Puetz et al., 2018	577	7	82.7834		541	8.5	87.399
CER-G-3	CER-G-3-31	2473	58	2537	26	2589	6	Díez Fernández et al., 2013	Puetz et al., 2018	2589	3	95.5195		2067	3	88.1471
CER-G-3	CER-G-3-32	576	14	611	15	743	45	Díez Fernández et al., 2013	Puetz et al., 2018	576	7	77.5236		979	16	88.5973
CER-G-3	CER-G-3-33	1939	66	1983	34	2030	11	Díez Fernández et al., 2013	Puetz et al., 2018	2030	5.5	95.5172		583	4.5	88.6018
CER-G-3	CER-G-3-34	732	28	894	28	1317	47	Díez Fernández et al., 2013	Puetz et al., 2018	732	14	55.5809		609	8	88.7755
CER-G-3	CER-G-3-35	1938	62	1969	33	2002	13	Díez Fernández et al., 2013	Puetz et al., 2018	2002	6.5	96.8032		587	7	88.9394
CER-G-3	CER-G-3-36	2070	52	2117	27	2162	10	Díez Fernández et al., 2013	Puetz et al., 2018	2162	5	95.7447		599	9.5	89.0045
CER-G-3	CER-G-3-37	639	24	646	20	672	22	Díez Fernández et al., 2013	Puetz et al., 2018	639	12	95.0893		693	9	89.3041
CER-G-3	CER-G-3-38	426	13	553	18	1115	59	Díez Fernández et al., 2013	Puetz et al., 2018	426	6.5	38.2063		603	10.5	89.5988
CER-G-3	CER-G-3-39	999	28	1007	20	1023	11	Díez Fernández et al., 2013	Puetz et al., 2018	999	14	97.654		596	8	89.6241
CER-G-3	CER-G-3-40	644	41	690	35	840	48	Díez Fernández et al., 2013	Puetz et al., 2018	644	20.5	76.6667		1601	29.5	89.8189
CER-G-3	CER-G-3-41	693	18	713	14	776	11	Díez Fernández et al., 2013	Puetz et al., 2018	693	9	89.3041		3059	4	89.8333
CER-G-3	CER-G-3-42	1285	29	1304	18	1336	10	Díez Fernández et al., 2013	Puetz et al., 2018	1336	5	96.1826		2099	7	90.1382
CER-G-3	CER-G-3-43	592	19	599	16	626	20	Díez Fernández et al., 2013	Puetz et al., 2018	592	9.5	94.5687		612	10	90.2655
CER-G-3	CER-G-3-44	1438	54	1505	41	1601	59	Díez Fernández et al., 2013	Puetz et al., 2018	1601	29.5	89.8189		583	7.5	90.3876
CER-G-3	CER-G-3-45	609	16	625	14	686	21	Díez Fernández et al., 2013	Puetz et al., 2018	609	8	88.7755		2075	5	91.9036
CER-G-3	CER-G-3-46	2539	65	2591	36	2633	37	Díez Fernández et al., 2013	Puetz et al., 2018	2633	18.5	96.4299		2835	3.5	92.7337
CER-G-3	CER-G-3-47	1167	26	1480	48	1961	101	Díez Fernández et al., 2013	Puetz et al., 2018	1961	50.5	59.5105		2061	5	92.8675
CER-G-3	CER-G-3-48	1957	61	1983	32	2011	7	Díez Fernández et al., 2013	Puetz et al., 2018	2011	3.5	97.3148		1772	11.5	93.0023
CER-G-3	CER-G-3-49	596	28	670	28	927	58	Díez Fernández et al., 2013	Puetz et al., 2018	596	14	64.2934		2088	5	93.4387
CER-G-3	CER-G-3-50	579	15	585	12	606	14	Díez Fernández et al., 2013	Puetz et al., 2018	579	7.5	95.5446		2161	5	93.7066
CER-G-3	CER-G-3-51	603	27	852	72	1572	223	Díez Fernández et al., 2013	Puetz et al., 2018	603	13.5	38.3588		551	9.5	94.0273
CER-G-3	CER-G-3-52	671	27	698	22	786	23	Díez Fernández et al., 2013	Puetz et al., 2018	671	13.5	85.369		745	10.5	94.0657
CER-G-3	CER-G-3-53	612	33	643	27	753	20	Díez Fernández et al., 2013	Puetz et al., 2018	612	16.5	81.2749		2223	3.5	94.5569
CER-G-3	CER-G-3-54	609	28	639	25	749	37	Díez Fernández et al., 2013	Puetz et al., 2018	609	14	81.3084		592	9.5	94.5687
CER-G-3	CER-G-3-55	629	42	882	227	1585	749	Díez Fernández et al., 2013	Puetz et al., 2018	629	21	39.6845		592	10	94.5687
CER-G-3	CER-G-3-56	643	28	682	26	812	55	Díez Fernández et al., 2013	Puetz et al., 2018	643	14	79.1872		627	14	95
CER-G-3	CER-G-3-57	583	9	598	8	658	18	Díez Fernández et al., 2013	Puetz et al., 2018	583	4.5	88.6018		671	17.5	95.0425
CER-G-3	CER-G-3-58	571	24	594	20	681	24	Díez Fernández et al., 2013	Puetz et al., 2018	571	12	83.8473		639	12	95.0893
CER-G-3	CER-G-3-59	551	19	558	15	586	12	Díez Fernández et al., 2013	Puetz et al., 2018	551	9.5	94.0273		2332	8.5	95.283
CER-G-3	CER-G-3-60	1865	67	2015	49	2174	66	Díez Fernández et al., 2013	Puetz et al., 2018	2174	33	85.7866		2172	3.5	95.3039
CER-G-3	CER-G-3-61	565	21	609	33	775	127	Díez Fernández et al., 2013	Puetz et al., 2018	565	10.5	72.9032		2030	5.5	95.5172
CER-G-3	CER-G-3-62	603	21	618	19	673	34	Díez Fernández et al., 2013	Puetz et al., 2018	603	10.5	89.5988		2589	3	95.5195
CER-G-3	CER-G-3-63	2006	93	2020	47	2034	7	Díez Fernández et al., 2013	Puetz et al., 2018	2034	3.5	98.6234		619	12.5	95.5247
CER-G-3	CER-G-3-64	681	18	712	15	813	27	Díez Fernández et al., 2013	Puetz et al., 2018	681	9	83.7638		579	7.5	95.5446
CER-G-3	CER-G-3-65	1429	52	1650	33	1945	12	Díez Fernández et al., 2013	Puetz et al., 2018	1945	6	73.4704		2162	5	95.7447
CER-G-3	CER-G-3-66	612	20	626	17	678	24	Díez Fernández et al., 2013	Puetz et al., 2018	612	10	90.2655		2235	8.5	95.8389
CER-G-3	CER-G-3-67	1892	76	1993	41	2099	14	Díez Fernández et al., 2013	Puetz et al., 2018	2099	7	90.1382		2682	4	95.8613
CER-G-3	CER-G-3-68	516	10	555	10	721	26	Díez Fernández et al., 2013	Puetz et al., 2018	516	5	71.5673		1718	5.5	95.8673
CER-G-3	CER-G-3-69	1731	51	1751	28	1774	7	Díez Fernández et al., 2013	Puetz et al., 2018	1774	3.5	97.5761		1336	5	96.1826
CER-G-3	CER-G-3-70	731	66	723	49	696	23	Díez Fernández et al., 2013	Puetz et al., 2018	731	33	105.029		676	29	96.2963
CER-G-3	CER-G-3-71	2224	62	2258	30	2289	8	Díez Fernández et al., 2013	Puetz et al., 2018	2289	4	97.1603		942	20.5	96.4176
CER-G-3	CER-G-3-72	496	11	538	11	719	20	Díez Fernández et al., 2013	Puetz et al., 2018	496	5.5	68.9847		2633	18.5	96.4299
CER-G-3	CER-G-3-73	468	8	557	9	940	20	Díez Fernández et al., 2013	Puetz et al., 2018	468	4	49.7872		574	12	96.4706
CER-G-3	CER-G-3-74	2098	68	2134	34	2169	7	Díez Fernández et al., 2013	Puetz et al., 2018	2169	3.5	96.7266		2169	3.5	96.7266
CER-G-3	CER-G-3-75	592	20	599	16	626	17	Díez Fernández et al., 2013	Puetz et al., 2018	592	10	94.5687		2002	6.5	96.8032
CER-G-3	CER-G-3-76	2077	77	2078	38	2080	7	Díez Fernández et al., 2013	Puetz et al., 2018	2080	3.5	99.8558		2112	4	97.1591
CER-G-3	CER-G-3-77	627	42	935	143	1756	422	Díez Fernández et al., 2013	Puetz et al., 2018	627	21	35.7062		2289	4	97.1603
CER-G-3	CER-G-3-78	2978	88	3007	36	3027	6	Díez Fernández et al., 2013	Puetz et al., 2018	3027	3	98.3812		2011	3.5	97.3148
CER-G-3	CER-G-3-79	467	16	561	18	966	42	Díez Fernández et al., 2013	Puetz et al., 2018	467	8	48.3437		598	12.5	97.3941
CER-G-3	CER-G-3-80	942	41	952	29	977	9	Díez Fernández et al., 2013	Puetz et al., 2018	942	20.5	96.4176		1774	3.5	97.5761
CER-G-3	CER-G-3-81	1822	65	1939	35	2067	6	Díez Fernández et al., 2013	Puetz et al., 2018	2067	3	88.1471		999	14	97.654
CER-G-3	CER-G-3-82	1242	51	1252	33	1268	8	Díez Fernández et al., 2013	Puetz et al., 2018	1268	4	97.9495		3048	3	97.8346
CER-G-3	CER-G-3-83	659	20	658	16	651	9	Díez Fernández et al., 2013	Puetz et al., 2018	659	10	101.229		618	12	97.9398
CER-G-3	CER-G-3-84	619	23	648	19	749	29	Díez Fernández et al., 2013	Puetz et al., 2018	619	11.5	82.6435		1268	4	97.9495
CER-G-3	CER-G-3-85	619	25	626	20	648	13	Díez Fernández et al., 2013	Puetz et al., 2018	619	12.5	95.5247		597	16	98.0296
CER-G-3	CER-G-3-86	589	31	587	25	577	15	Díez Fernández et al., 2013	Puetz et al., 2018	589	15.5	102.08		592	13.5	98.1758
CER-G-3	CER-G-3-87	2444	77	2687	36	2875	9	Díez Fernández et al., 2013	Puetz et al., 2018	2875	4.5	85.0087		3027	3	98.3812
CER-G-3	CER-G-3-88	678	38	677	29	676	11	Díez Fernández et al., 2013	Puetz et al., 2018	678	19	100.296		2034	3.5	98.6234
CER-G-3	CER-G-3-89	578	16	673	17	1005	37	Díez Fernández et al., 2013	Puetz et al., 2018	578	8	57.5124		2047	3.5	98.6321
CER-G-3	CER-G-3-90	598	25	601	20	614	10	Díez Fernández et al., 2013	Puetz et al., 2018	598	12.5	97.3941		1149	5	99.3908
CER-G-3	CER-G-3-91	627	28	634	22	660	13	Díez Fernández et al., 2013	Puetz et al., 2018	627	14	95		584	10	99.4889
CER-G-3	CER-G-3-92	592	27	594	21	603	14	Díez Fernández et al., 2013	Puetz et al., 2018	592	13.5	98.1758		2057	3.5	99.5139
CER-G-3	CER-G-3-93	596	21	636	18	780	26	Díez Fernández et al., 2013	Puetz et al., 2018	596	10.5	76.4103		2080	3.5	99.8558
CER-G-3	CER-G-3-94	1647	50	1679	29	1718	11	Díez Fernández et al., 2013	Puetz et al., 2018	1718	5.5	95.8673		678	19	100.296
CER-G-3	CER-G-3-95	477	18	540	20	813	54	Díez Fernández et al., 2013	Puetz et al., 2018	477	9	58.6716		561	12.5	100.358
CER-G-3	CER-G-3-96	676	58	682	45	702	13	Díez Fernández et al., 2013	Puetz et al., 2018	676	29	96.2963		659	10	101.229
CER-G-3	CER-G-3-97	479	16	544	15	825	29	Díez Fernández et al., 2013	Puetz et al., 2018	479	8	58.0606		589	15.5	102.08
CER-G-3	CER-G-3-98	1914	135	1985	71	2061	10	Díez Fernández et al., 2013	Puetz et al., 2018	2061	5	92.8675		621	13.5	102.645
CER-G-3	CER-G-3-99	486	36	576	35	951	46	Díez Fernández et al., 2013	Puetz et al., 2018	486	18	51.1041		731	33	105.029
														CER-G-4
CER-G-4	CER-G-4-01	619	17	674	24	862	83	Díez Fernández et al., 2013	Puetz et al., 2018	619	8.5	71.8097		592	9	30.3746
CER-G-4	CER-G-4-02	701	23	683	17	625	19	Díez Fernández et al., 2013	Puetz et al., 2018	701	11.5	112.16		653	9	35.4891
CER-G-4	CER-G-4-03	611	28	653	28	801	66	Díez Fernández et al., 2013	Puetz et al., 2018	611	14	76.2797		498	9.5	38.8759
CER-G-4	CER-G-4-04	709	20	691	15	636	16	Díez Fernández et al., 2013	Puetz et al., 2018	709	10	111.478		597	11.5	39.6941
CER-G-4	CER-G-4-05	1099	43	1068	28	1005	8	Díez Fernández et al., 2013	Puetz et al., 2018	1005	4	109.353		449	11.5	45.8163
CER-G-4	CER-G-4-06	542	17	540	14	529	22	Díez Fernández et al., 2013	Puetz et al., 2018	542	8.5	102.457		649	4	46.5567
CER-G-4	CER-G-4-07	1102	67	1064	43	987	15	Díez Fernández et al., 2013	Puetz et al., 2018	987	7.5	111.651		522	9	47.8022
CER-G-4	CER-G-4-08	2294	66	2207	32	2128	17	Díez Fernández et al., 2013	Puetz et al., 2018	2128	8.5	107.801		538	34.5	51.1893
CER-G-4	CER-G-4-09	1023	43	1002	29	955	8	Díez Fernández et al., 2013	Puetz et al., 2018	955	4	107.12		1949	13	52.078
CER-G-4	CER-G-4-10	2212	108	2265	63	2313	68	Díez Fernández et al., 2013	Puetz et al., 2018	2313	34	95.6334		564	7	54.3877
CER-G-4	CER-G-4-100	1519	284	1963	177	2469	16	Díez Fernández et al., 2013	Puetz et al., 2018	2469	8	61.5229		528	10.5	55
CER-G-4	CER-G-4-101	705	25	718	23	759	53	Díez Fernández et al., 2013	Puetz et al., 2018	705	12.5	92.8854		593	10.5	55.0093
CER-G-4	CER-G-4-102	1994	169	2047	86	2100	6	Díez Fernández et al., 2013	Puetz et al., 2018	2100	3	94.9524		861	28	59.1346
CER-G-4	CER-G-4-103	741	30	723	22	667	7	Díez Fernández et al., 2013	Puetz et al., 2018	741	15	111.094		502	11	59.5492
CER-G-4	CER-G-4-104	848	28	829	20	778	6	Díez Fernández et al., 2013	Puetz et al., 2018	848	14	108.997		1786	4.5	60.1344
CER-G-4	CER-G-4-105	660	24	658	19	651	8	Díez Fernández et al., 2013	Puetz et al., 2018	660	12	101.382		710	27.5	60.1695
CER-G-4	CER-G-4-106	735	47	722	36	681	41	Díez Fernández et al., 2013	Puetz et al., 2018	735	23.5	107.93		511	7	60.8333
CER-G-4	CER-G-4-107	2112	66	2071	32	2030	4	Díez Fernández et al., 2013	Puetz et al., 2018	2030	2	104.039		2469	8	61.5229
CER-G-4	CER-G-4-108	646	31	693	26	848	24	Díez Fernández et al., 2013	Puetz et al., 2018	646	15.5	76.1792		535	8.5	63.5392
CER-G-4	CER-G-4-109	649	8	842	23	1394	72	Díez Fernández et al., 2013	Puetz et al., 2018	649	4	46.5567		537	7.5	64.1577
CER-G-4	CER-G-4-11	1424	141	1457	93	1507	100	Díez Fernández et al., 2013	Puetz et al., 2018	1507	50	94.4924		2558	13.5	67.6701
CER-G-4	CER-G-4-110	689	31	696	27	719	49	Díez Fernández et al., 2013	Puetz et al., 2018	689	15.5	95.8275		800	30.5	67.9117
CER-G-4	CER-G-4-111	978	36	943	24	863	10	Díez Fernández et al., 2013	Puetz et al., 2018	978	18	113.326		610	12	68.6937
CER-G-4	CER-G-4-112	908	33	882	23	815	9	Díez Fernández et al., 2013	Puetz et al., 2018	908	16.5	111.411		766	16	71.7228
CER-G-4	CER-G-4-113	449	23	547	23	980	24	Díez Fernández et al., 2013	Puetz et al., 2018	449	11.5	45.8163		619	8.5	71.8097
CER-G-4	CER-G-4-114	1107	47	1071	31	999	5	Díez Fernández et al., 2013	Puetz et al., 2018	999	2.5	110.811		617	7.5	72.7594
CER-G-4	CER-G-4-115	705	37	737	39	835	104	Díez Fernández et al., 2013	Puetz et al., 2018	705	18.5	84.4311		1864	23	72.8541
CER-G-4	CER-G-4-116	680	18	678	14	672	9	Díez Fernández et al., 2013	Puetz et al., 2018	680	9	101.19		654	18	73.5658
CER-G-4	CER-G-4-117	1015	75	1358	60	1949	26	Díez Fernández et al., 2013	Puetz et al., 2018	1949	13	52.078		484	10	74.8068
CER-G-4	CER-G-4-118	620	21	620	17	619	8	Díez Fernández et al., 2013	Puetz et al., 2018	620	10.5	100.162		647	16	74.971
CER-G-4	CER-G-4-119	655	18	648	14	622	9	Díez Fernández et al., 2013	Puetz et al., 2018	655	9	105.305		574	13.5	75.4271
CER-G-4	CER-G-4-12	3025	249	2788	100	2621	45	Díez Fernández et al., 2013	Puetz et al., 2018	2621	22.5	115.414		759	8	76.0521
CER-G-4	CER-G-4-120	692	33	673	25	610	9	Díez Fernández et al., 2013	Puetz et al., 2018	692	16.5	113.443		646	15.5	76.1792
CER-G-4	CER-G-4-13	1175	127	1185	93	1203	133	Díez Fernández et al., 2013	Puetz et al., 2018	1203	66.5	97.6725		611	14	76.2797
CER-G-4	CER-G-4-14	3470	97	3360	35	3295	3	Díez Fernández et al., 2013	Puetz et al., 2018	3295	1.5	105.311		560	7.5	77.0289
CER-G-4	CER-G-4-15	564	14	668	37	1037	142	Díez Fernández et al., 2013	Puetz et al., 2018	564	7	54.3877		622	7.5	78.1407
CER-G-4	CER-G-4-16	588	21	594	17	617	13	Díez Fernández et al., 2013	Puetz et al., 2018	588	10.5	95.2998		1919	5.5	80.9276
CER-G-4	CER-G-4-17	1547	104	1653	62	1791	30	Díez Fernández et al., 2013	Puetz et al., 2018	1791	15	86.3763		655	10	82.2864
CER-G-4	CER-G-4-18	679	38	672	29	650	7	Díez Fernández et al., 2013	Puetz et al., 2018	679	19	104.462		595	10.5	82.296
CER-G-4	CER-G-4-19	2605	105	2614	46	2621	8	Díez Fernández et al., 2013	Puetz et al., 2018	2621	4	99.3895		705	18.5	84.4311
CER-G-4	CER-G-4-20	813	83	767	58	638	11	Díez Fernández et al., 2013	Puetz et al., 2018	813	41.5	127.429		1796	34.5	85.078
CER-G-4	CER-G-4-21	609	30	620	24	661	23	Díez Fernández et al., 2013	Puetz et al., 2018	609	15	92.1331		698	22	85.2259
CER-G-4	CER-G-4-22	653	18	991	31	1840	70	Díez Fernández et al., 2013	Puetz et al., 2018	653	9	35.4891		560	10	85.3659
CER-G-4	CER-G-4-23	740	28	723	21	671	13	Díez Fernández et al., 2013	Puetz et al., 2018	740	14	110.283		1791	15	86.3763
CER-G-4	CER-G-4-24	906	49	905	35	901	19	Díez Fernández et al., 2013	Puetz et al., 2018	906	24.5	100.555		639	6.5	88.1379
CER-G-4	CER-G-4-25	516	23	516	19	520	19	Díez Fernández et al., 2013	Puetz et al., 2018	516	11.5	99.2308		788	33.5	88.44
CER-G-4	CER-G-4-26	828	54	824	42	813	56	Díez Fernández et al., 2013	Puetz et al., 2018	828	27	101.845		672	17	88.5375
CER-G-4	CER-G-4-27	706	34	710	27	722	33	Díez Fernández et al., 2013	Puetz et al., 2018	706	17	97.7839		682	13.5	90.2116
CER-G-4	CER-G-4-28	759	16	823	19	998	52	Díez Fernández et al., 2013	Puetz et al., 2018	759	8	76.0521		1843	5.5	90.5046
CER-G-4	CER-G-4-29	698	44	727	36	819	42	Díez Fernández et al., 2013	Puetz et al., 2018	698	22	85.2259		536	13	91.0017
CER-G-4	CER-G-4-30	795	57	801	43	819	34	Díez Fernández et al., 2013	Puetz et al., 2018	795	28.5	97.0696		639	10	91.4163
CER-G-4	CER-G-4-31	592	18	964	45	1949	118	Díez Fernández et al., 2013	Puetz et al., 2018	592	9	30.3746		617	11.5	91.9523
CER-G-4	CER-G-4-32	710	55	834	72	1180	197	Díez Fernández et al., 2013	Puetz et al., 2018	710	27.5	60.1695		609	15	92.1331
CER-G-4	CER-G-4-33	672	34	692	28	759	36	Díez Fernández et al., 2013	Puetz et al., 2018	672	17	88.5375		705	12.5	92.8854
CER-G-4	CER-G-4-34	647	32	697	42	863	134	Díez Fernández et al., 2013	Puetz et al., 2018	647	16	74.971		497	14.5	93.0712
CER-G-4	CER-G-4-35	788	67	815	51	891	38	Díez Fernández et al., 2013	Puetz et al., 2018	788	33.5	88.44		1507	50	94.4924
CER-G-4	CER-G-4-36	2056	64	1999	32	1940	4	Díez Fernández et al., 2013	Puetz et al., 2018	1940	2	105.979		2100	3	94.9524
CER-G-4	CER-G-4-37	595	21	622	20	723	45	Díez Fernández et al., 2013	Puetz et al., 2018	595	10.5	82.296		588	10.5	95.2998
CER-G-4	CER-G-4-38	597	23	826	52	1504	159	Díez Fernández et al., 2013	Puetz et al., 2018	597	11.5	39.6941		2313	34	95.6334
CER-G-4	CER-G-4-39	875	56	880	41	894	16	Díez Fernández et al., 2013	Puetz et al., 2018	875	28	97.8747		689	15.5	95.8275
CER-G-4	CER-G-4-40	700	25	683	19	627	5	Díez Fernández et al., 2013	Puetz et al., 2018	700	12.5	111.643		605	14.5	96.0317
CER-G-4	CER-G-4-41	721	31	707	23	663	15	Díez Fernández et al., 2013	Puetz et al., 2018	721	15.5	108.748		795	28.5	97.0696
CER-G-4	CER-G-4-43	655	20	688	17	796	31	Díez Fernández et al., 2013	Puetz et al., 2018	655	10	82.2864		1203	66.5	97.6725
CER-G-4	CER-G-4-44	1029	40	993	26	915	4	Díez Fernández et al., 2013	Puetz et al., 2018	915	2	112.459		706	17	97.7839
CER-G-4	CER-G-4-45	654	36	709	30	889	18	Díez Fernández et al., 2013	Puetz et al., 2018	654	18	73.5658		875	28	97.8747
CER-G-4	CER-G-4-46	497	29	503	24	534	17	Díez Fernández et al., 2013	Puetz et al., 2018	497	14.5	93.0712		1956	2.5	97.955
CER-G-4	CER-G-4-47	536	26	546	22	589	30	Díez Fernández et al., 2013	Puetz et al., 2018	536	13	91.0017		1178	12.5	98.3871
CER-G-4	CER-G-4-48	684	25	684	20	687	12	Díez Fernández et al., 2013	Puetz et al., 2018	684	12.5	99.5633		516	11.5	99.2308
CER-G-4	CER-G-4-49	593	21	705	24	1078	55	Díez Fernández et al., 2013	Puetz et al., 2018	593	10.5	55.0093		2621	4	99.3895
CER-G-4	CER-G-4-50	654	15	646	12	618	15	Díez Fernández et al., 2013	Puetz et al., 2018	654	7.5	105.825		684	12.5	99.5633
CER-G-4	CER-G-4-51	1528	44	1644	40	1796	69	Díez Fernández et al., 2013	Puetz et al., 2018	1796	34.5	85.078		620	10.5	100.162
CER-G-4	CER-G-4-52	502	22	568	23	843	59	Díez Fernández et al., 2013	Puetz et al., 2018	502	11	59.5492		906	24.5	100.555
CER-G-4	CER-G-4-53	1668	99	1747	56	1843	11	Díez Fernández et al., 2013	Puetz et al., 2018	1843	5.5	90.5046		663	15	100.913
CER-G-4	CER-G-4-55	484	20	513	21	647	67	Díez Fernández et al., 2013	Puetz et al., 2018	484	10	74.8068		988	36	101.022
CER-G-4	CER-G-4-56	663	30	661	23	657	17	Díez Fernández et al., 2013	Puetz et al., 2018	663	15	100.913		680	9	101.19
CER-G-4	CER-G-4-58	560	20	580	17	656	26	Díez Fernández et al., 2013	Puetz et al., 2018	560	10	85.3659		660	12	101.382
CER-G-4	CER-G-4-59	1115	34	1077	22	1000	4	Díez Fernández et al., 2013	Puetz et al., 2018	1000	2	111.5		828	27	101.845
CER-G-4	CER-G-4-60	622	15	661	18	796	57	Díez Fernández et al., 2013	Puetz et al., 2018	622	7.5	78.1407		532	10	101.916
CER-G-4	CER-G-4-61	498	19	665	39	1281	136	Díez Fernández et al., 2013	Puetz et al., 2018	498	9.5	38.8759		630	11.5	102.107
CER-G-4	CER-G-4-62	800	61	907	58	1178	109	Díez Fernández et al., 2013	Puetz et al., 2018	800	30.5	67.9117		1035	34	102.415
CER-G-4	CER-G-4-63	2255	89	2186	42	2122	4	Díez Fernández et al., 2013	Puetz et al., 2018	2122	2	106.268		763	25	102.416
CER-G-4	CER-G-4-64	1916	55	1935	29	1956	5	Díez Fernández et al., 2013	Puetz et al., 2018	1956	2.5	97.955		542	8.5	102.457
CER-G-4	CER-G-4-65	861	56	1046	53	1456	82	Díez Fernández et al., 2013	Puetz et al., 2018	861	28	59.1346		1981	1.5	103.937
CER-G-4	CER-G-4-66	2194	75	2111	35	2031	3	Díez Fernández et al., 2013	Puetz et al., 2018	2031	1.5	108.026		808	13.5	103.99
CER-G-4	CER-G-4-67	639	20	653	16	699	19	Díez Fernández et al., 2013	Puetz et al., 2018	639	10	91.4163		2030	2	104.039
CER-G-4	CER-G-4-68	1074	30	1337	23	1786	9	Díez Fernández et al., 2013	Puetz et al., 2018	1786	4.5	60.1344		667	12.5	104.219
CER-G-4	CER-G-4-69	2127	91	2065	44	2005	3	Díez Fernández et al., 2013	Puetz et al., 2018	2005	1.5	106.085		679	19	104.462
CER-G-4	CER-G-4-70	1731	88	2139	53	2558	27	Díez Fernández et al., 2013	Puetz et al., 2018	2558	13.5	67.6701		655	9	105.305
CER-G-4	CER-G-4-71	537	15	598	19	837	65	Díez Fernández et al., 2013	Puetz et al., 2018	537	7.5	64.1577		3295	1.5	105.311
CER-G-4	CER-G-4-72	617	15	669	14	848	27	Díez Fernández et al., 2013	Puetz et al., 2018	617	7.5	72.7594		654	7.5	105.825
CER-G-4	CER-G-4-73	808	27	800	19	777	7	Díez Fernández et al., 2013	Puetz et al., 2018	808	13.5	103.99		1940	2	105.979
CER-G-4	CER-G-4-74	682	27	700	22	756	28	Díez Fernández et al., 2013	Puetz et al., 2018	682	13.5	90.2116		2005	1.5	106.085
CER-G-4	CER-G-4-75	639	13	658	12	725	22	Díez Fernández et al., 2013	Puetz et al., 2018	639	6.5	88.1379		2122	2	106.268
CER-G-4	CER-G-4-76	1060	67	1052	50	1035	68	Díez Fernández et al., 2013	Puetz et al., 2018	1035	34	102.415		675	14	106.804
CER-G-4	CER-G-4-77	763	50	759	37	745	17	Díez Fernández et al., 2013	Puetz et al., 2018	763	25	102.416		955	4	107.12
CER-G-4	CER-G-4-78	532	20	530	16	522	13	Díez Fernández et al., 2013	Puetz et al., 2018	532	10	101.916		2128	8.5	107.801
CER-G-4	CER-G-4-79	610	24	673	32	888	106	Díez Fernández et al., 2013	Puetz et al., 2018	610	12	68.6937		735	23.5	107.93
CER-G-4	CER-G-4-80	630	23	627	18	617	9	Díez Fernández et al., 2013	Puetz et al., 2018	630	11.5	102.107		2031	1.5	108.026
CER-G-4	CER-G-4-81	2083	154	1972	75	1858	18	Díez Fernández et al., 2013	Puetz et al., 2018	1858	9	112.11		721	15.5	108.748
CER-G-4	CER-G-4-82	2059	67	2020	33	1981	3	Díez Fernández et al., 2013	Puetz et al., 2018	1981	1.5	103.937		848	14	108.997
CER-G-4	CER-G-4-83	511	14	576	14	840	34	Díez Fernández et al., 2013	Puetz et al., 2018	511	7	60.8333		1005	4	109.353
CER-G-4	CER-G-4-84	528	21	617	30	960	102	Díez Fernández et al., 2013	Puetz et al., 2018	528	10.5	55		740	14	110.283
CER-G-4	CER-G-4-85	1159	74	1165	49	1178	25	Díez Fernández et al., 2013	Puetz et al., 2018	1178	12.5	98.3871		999	2.5	110.811
CER-G-4	CER-G-4-86	522	18	642	23	1092	60	Díez Fernández et al., 2013	Puetz et al., 2018	522	9	47.8022		741	15	111.094
CER-G-4	CER-G-4-87	605	29	610	23	630	9	Díez Fernández et al., 2013	Puetz et al., 2018	605	14.5	96.0317		908	16.5	111.411
CER-G-4	CER-G-4-88	617	23	628	19	671	20	Díez Fernández et al., 2013	Puetz et al., 2018	617	11.5	91.9523		709	10	111.478
CER-G-4	CER-G-4-89	538	69	647	68	1051	107	Díez Fernández et al., 2013	Puetz et al., 2018	538	34.5	51.1893		1000	2	111.5
CER-G-4	CER-G-4-90	766	32	848	27	1068	33	Díez Fernández et al., 2013	Puetz et al., 2018	766	16	71.7228		700	12.5	111.643
CER-G-4	CER-G-4-91	535	17	598	21	842	71	Díez Fernández et al., 2013	Puetz et al., 2018	535	8.5	63.5392		987	7.5	111.651
CER-G-4	CER-G-4-92	560	15	594	14	727	30	Díez Fernández et al., 2013	Puetz et al., 2018	560	7.5	77.0289		797	19	111.938
CER-G-4	CER-G-4-93	574	27	613	33	761	109	Díez Fernández et al., 2013	Puetz et al., 2018	574	13.5	75.4271		1858	9	112.11
CER-G-4	CER-G-4-94	1553	39	1715	24	1919	11	Díez Fernández et al., 2013	Puetz et al., 2018	1919	5.5	80.9276		701	11.5	112.16
CER-G-4	CER-G-4-95	1358	87	1568	60	1864	46	Díez Fernández et al., 2013	Puetz et al., 2018	1864	23	72.8541		915	2	112.459
CER-G-4	CER-G-4-96	667	25	661	19	640	6	Díez Fernández et al., 2013	Puetz et al., 2018	667	12.5	104.219		978	18	113.326
CER-G-4	CER-G-4-97	675	28	666	22	632	14	Díez Fernández et al., 2013	Puetz et al., 2018	675	14	106.804		692	16.5	113.443
CER-G-4	CER-G-4-98	988	72	985	52	978	59	Díez Fernández et al., 2013	Puetz et al., 2018	988	36	101.022		2621	22.5	115.414
CER-G-4	CER-G-4-99	797	38	775	27	712	7	Díez Fernández et al., 2013	Puetz et al., 2018	797	19	111.938		813	41.5	127.429
														CN-G
CN-G	CN-G-1-02	653	35	654	27	659	13	Díez Fernández et al., 2013	Puetz et al., 2018	653	17.5	99.0895		486	7	26.1853
CN-G	CN-G-1-03	456	21	472	18	546	21	Díez Fernández et al., 2013	Puetz et al., 2018	456	10.5	83.5165		509	8.5	29.2865
CN-G	CN-G-1-04	1903	64	1911	34	1920	10	Díez Fernández et al., 2013	Puetz et al., 2018	1920	5	99.1146		488	6.5	35.0827
CN-G	CN-G-1-05	1507	84	1598	51	1720	24	Díez Fernández et al., 2013	Puetz et al., 2018	1720	12	87.6163		498	8	40.1289
[truncated: 4,125 more rows]

## Sheet: GTMZ_ISOPLOTR_CSV
OS1	OS2		CER-G-3	CER-G-4	CN-G		OW165		GCH-02	GCH-06	GCH-17	GCH-21	GCH-24		BA-1	BA-12	BA-4	BA-5	BA-6	BA-7	BA-8	BA-9		GCH-PA-1	GCH-PA-2	GCH-PA-3	GCH-PA-4	GCH-PA-5	GCH-PA-6		ACO-14-01	ACO-14-02		GCH-07	GCH-08	GCH-09	GCH-10	GCH-11	GCH-12		SALD01		Upper Parautochthon	Lower Allochthon	Middle Allochthon	Upper Allochthon LT	Upper Allochthon M-HT		UP(CAM)
[truncated: 829 more rows]
[truncated: 5 more columns]

[truncated: 2 more sheets: WALZ-CZ, WALZ+CZ_ISOPLOTR_CSV]
