# Supplementary material for: A tectonic carpet of Variscan flysch at the base of a rootless accretionary prism in northwestern Iberia: U–Pb zircon age constrains from sediments and volcanic olistoliths
Source: Copernicus journal article supplement (doi:10.5194/se-12-835-2021), 2021-04-15
Supplement: Supplementary file 5 [file se-12-835-2021-supplement.zip › SUPP TABLES/Supplementary Table 19_Synorogenic samples_Preparation to MDS.xlsx]

## Sheet: TO ISOPLOT R
New data/this paper																Dias da Silva et al., 2015					Martínez Catalán et al., 2004		Martínez Catalán et al., 2008					Martínez Catalán et al., 2016
CR-ZR-01	MEI-ZR-01	GIM-ZR-01	PICON-2	P-381	P-385	MIR-41	AD-PO-49	AD-PO-57	AD-PO-66	AD-PO-55	EC-PO-419	AD-PO-48B	EC-PO-293	EC-PO-337		VC21	VC45	VC57	SALD01		SO-1; SO-2		SO-4	SO-5	SO-6	SO-7		SO-8	SO-9	SO-10	SO-11	SO-12	SO-13	SO-14
439.063	442.99	326.629	349.7	455.688	468.317	368.7	467.767	368.355	431.339	443.586	433.256	355.334	426.497	435.133		323.14	527.545	532.767	485.354		324		380	355	378	552		553	362	458	551	340	350	333
451.904	467.276	350.643	354.762	456.763	473.568	478.7	518.779	369.333	465.274	463.345	440.956	375.284	446.446	441.898		385.024	528.498	549.472	485.793		340		448	360	386	553		557	364	469	579	353	353	338
461.975	473.326	351.015	356.086	461.926	474.134	492.9	548.518	373.179	472.127	476.906	445.259	545.858	476.573	447.153		388.628	543.379	562.815	501.885		363		484	476	386	571		566	382	474	596	357	473	340
466.353	484.995	358.75	358.518	463.075	474.212	495.9	555.067	375.88	479.319	478.752	446.197	550.867	482.082	461.71		395.697	557.105	566.306	521.244		417		489	482	387	574		571	394	481	601	367	485	341
467.025	485.278	369.418	359.614	463.74	475.446	500.1	562.698	467.074	481.15	479.045	446.348	566.469	489.983	466.738		400.975	557.498	569.951	540.26		476		490	489	393	574		572	432	483	603	371	522	342
468.807	486.251	375.299	369.538	466.633	475.773	512.6	572.304	492.263	494.051	489.55	450.185	572.984	494.204	470.339		406.163	569.2	571.493	544.104		484		495	533	393	581		573	477	485	604	372	525	399
469.019	487.563	384.066	372.914	467.056	477.774	551.6	573.815	495.714	494.136	493.066	455.243	601.998	495.716	470.93		426.009	572.364	578.835	552.21		485		500	537	394	581		574	484	485	770	489	533	460
473.897	489.91	385.862	376.01	471.532	478.988	554	575.556	498.564	494.289	495.685	460.872	613.029	500.483	472.125		432.895	576.953	581.064	553.02		494		516	545	395	582		576	503	487	865	518	535	467
476.044	490.904	463.063	376.048	477.058	479.913	554.2	579.481	517.506	495.144	526.869	461.812	615.112	501.779	473.002		437.23	581.843	583.068	553.75		499		530	545	403	585		591	515	499	870	518	537	493
477.879	491.774	503.455	379.055	480.591	483.089	555.1	580.699	536.511	495.657	564.621	462.186	618.209	520.732	473.232		447.727	581.983	585.07	554.824		499		530	557	404	588		612	535	569	997	527	543	496
478.932	491.889	507.829	381.329	482.565	485.393	566.3	592.202	539.111	496.551	566.523	462.843	627.299	531.57	474.865		450.713	583.888	595.572	556.788		501		531	563	430	601		613	535	573	1033	532	550	510
479.719	492.435	509.502	382.558	483.143	485.838	572.7	598.538	543.803	500.953	571.128	465.619	650.195	532.457	478.218		464.641	603.975	601.174	559.97		504		536	563	457	604		643	543	582	1121	539	554	514
480.269	493.25	520.666	388.452	485.056	485.841	573	614.575	553.277	501.123	580.269	467.079	655.781	537.029	479.356		478.593	608.762	602.108	570.515		512		538	569	463	608		643	546	585	1857	541	561	522
480.538	493.708	522.904	461.001	485.396	486.749	576	616.238	553.368	505.478	583.252	467.719	657.19	537.157	479.813		479.583	610.211	603.341	570.682		514		540	570	469	615		650	547	592	1997	541	570	523
480.69	493.945	528.926	466.384	485.445	487.114	577.1	616.782	559.325	506.26	583.566	467.98	657.583	538.928	480.6		481.448	613.826	606.71	570.986		514		540	570	469	621		650	557	594	2069	544	573	542
482.634	494.102	528.929	483.329	486.604	487.386	578.7	618.856	566.079	507.956	589.527	469.001	664.276	539.586	482.089		483.905	620.285	613.035	570.99		518		541	577	474	626		655	560	599		554	591	544
482.93	494.864	529.393	487.044	487.835	487.412	582.1	621.718	570.718	508.649	594.216	469.947	673.342	542.234	483.46		484.452	622.354	617.224	571.053		525		543	583	477	628		655	562	600		555	600	549
483.609	495.58	534.064	505.281	489.942	487.569	588	627.574	570.87	509.074	595.248	470.042	673.555	544.888	484.746		488.104	622.598	621.064	573.935		533		543	583	480	631		662	572	602		557	608	570
483.788	497.157	534.155	523.83	491.121	487.87	590	628.357	571.555	514.896	597.547	470.468	674.311	548.521	486.04		490.2	625.174	624.778	574.471		534		556	590	488	645		676	575	618		557	648	577
484.597	497.632	536.666	524.099	491.245	489.958	591.2	628.414	573.951	516.109	597.611	470.513	677.389	553.6	487.102		492.407	631.788	632.006	577.566		536		562	604	490	653		695	577	620		557	699	579
484.755	498.894	542.506	530.13	492.878	490.374	598.2	628.47	575.054	518.125	601.089	471.019	682.531	555.846	487.838		496.091	635.831	633.59	584.747		541		565	609	490	662		773	582	627		579	963	596
485.471	499.422	548.7	544.011	492.991	490.569	600.4	634.182	577.702	519.065	601.723	471.602	685.862	565.379	489.545		506.989	636.125	634.33	587.3		544		570	627	493	665		1808	598	629		580	1155	722
486.03	501.371	550.398	549.965	494.321	491.153	602.4	634.195	578.474	520.406	601.895	473.294	694.581	565.384	489.595		510.637	636.426	639.138	592.597		544		571	656	497	733		1897	598	634		585	1224	801
486.221	503.93	552.533	552.322	494.381	491.329	605	636.075	584.653	522.488	604.432	474.786	695.23	567.221	490.012		514.059	639.265	644.192	597.675		544		571	661	497	1630		1898	607	635		589	1967	1166
487.04	504.969	554.069	553.466	494.873	491.631	606.9	641.263	585.389	534.459	605.429	475.5	708.57	568.233	490.424		521.821	644.206	656.216	598.276		549		577	670	498	1748		1898	619	638		603	2016	1191
487.423	505.629	555.607	555.616	496.462	491.761	612	641.998	586.456	535.934	605.84	476.993	709.193	574.834	491.156		536.494	644.254	657.009	598.416		551		583	701	498	1834		1907	632	652		629	2035	2004
488.15	507.005	558.927	556.336	497.32	492.483	621.3	648.012	587.908	546.019	606.656	477.981	722.248	577.399	491.688		572.24	645.303	657.591	600.818		556		608	776	499	1858		1907	650	653		639	2041	2042
489.352	507.158	566.424	567.64	497.556	492.546	622.5	648.84	593.212	547.377	615.842	478.385	723.287	589.441	491.964		574.13	650.858	664.445	602.221		565		613	845	500	1889		1913	675	659		676	2058	2047
490.073	508.357	573.211	573.012	498.153	492.953	623.7	650.993	593.331	547.74	616.619	481.281	725.173	600.579	492.648		575.061	654.095	666.124	606.203		595		621	983	500	1891		1920	682	664		1162	2061	2051
491.012	508.643	573.318	579.08	500	493.284	625	657.438	599.199	549.421	617.497	482.38	732.017	608.809	494.625		578.348	654.279	671.13	607.114		637		625	1029	501	1904		1923	716	667		1381	2065	2065
492.585	508.724	580.248	584.195	500.361	493.578	626.3	658.015	601.923	551.332	618.51	486.312	741.099	615.81	495.997		580.154	656.515	676.869	609.52		659		628	1495	501	1909		1987	1244	669		1710	2079	2075
492.829	512.472	583.79	595.009	500.567	494.56	630.3	659.29	602.357	554.138	619.443	488.109	741.418	617.69	496.674		603.192	656.742	683.022	610.451		1819		630	1499	501	1915		1991	1873	685		1741	2095	2076
493.928	515.506	585.255	621.592	500.85	494.792	632	664.938	602.728	554.25	621.047	489.853	750.711	617.865	496.867		611.936	656.839	702.928	611.277		1892		636	1530	502	1917		2011	1887	743		1868	2109	2080
495.975	515.594	589.68	621.665	501.148	494.855	637	666.343	603.629	555.228	621.081	489.936	761.978	619.476	497.316		613.849	657.678	704.876	611.617		1913		646	1806	502	1918		2049	1925	809		1890	2116	2091
498.548	516.976	598.142	625.79	501.771	495.798	641.3	668.735	604.276	561.166	624.699	497.305	781.546	627.12	497.474		626.499	657.856	715.978	615.001		1935		649	1898	504	1934		2055	1977	842		1970	2145	2234
499.807	518.005	607.609	665.382	502.096	495.986	644.7	670.757	604.379	564.898	625.704	497.437	792.396	629.121	498.562		633.34	669.127	719.206	616.559		2004		662	1906	504	2002		2068	2008	863		2014	2146	2497
506.32	518.145	612.135	681.447	502.75	496.133	645.7	681.24	605.832	566.39	628.413	501.043	813.375	633.445	503.579		637.758	669.649	740.471	617.343		2043		728	1913	505	2019		2075	2021	987		2033	2158	2622
506.418	519.39	616.901	705.003	503.813	496.637	646.8	681.848	606.964	569.088	633.198	502.645	866.074	639.12	504.784		645.22	670.804	748.97	620.081		2045		749	2041	507	2023		2109	2040	1004		2059	2223	2638
506.81	521.593	631.557	717.32	504.872	496.673	649.1	690.012	611.609	569.229	636.727	508.568	879.644	641.029	507.11		649.335	681.559	787.74	622.721		2059		1212	2044	513	2029		2138	2062	1023		2065	2258	2642
507.509	524.502	634.813	737.813	505.003	497.02	650.5	702.561	612.735	574.311	637.796	510.306	887.526	650.397	508.54		667.272	689.59	831.914	624.168		2079		1226	2047	514	2030		2149	2101	1038		2081	2454	2660
507.583	524.685	693.56	843.009	505.255	497.263	654	702.619	615.083	576.787	643.101	517.84	982.76	661.272	509.04		736.673	694.3	840.028	624.884		2088		1249	2062	515	2039		2152	2105	1064		2083	2516
508.219	525.084	885.678	879.935	505.492	497.738	655.1	717.115	619.166	586.281	645.084	595.153	996.355	664.834	510.271		745.012	694.772	857.407	624.896		2090		2017	2067	518	2046		2163	2121	1133		2089	2556
509.158	525.538	1208.59	1100.38	505.723	498.051	666	734.54	620.13	587.941	647.27	614.16	1014.75	682.634	510.65		815.881	698.122	926.469	627.301		2095		2030	2080	524	2054		2178	2137	1757		2089	2598
510.444	525.839	1368.79	1144.95	505.827	500.105	670	736.065	623.306	594.189	655.041	638.948	1089.76	699.031	512.657		825.978	700.197	943.645	628.098		2103		2073	2082	547	2057		2202	2164	1840		2093	2601
511.948	527.169	1490.02	1177.08	507.439	500.41	755	740.351	625.764	594.271	656.871	694.79	1492.38	775.371	514.478		976.08	702.796	945.067	629.975		2106		2083	2084	547	2067		2207	2165	1852		2093	2632
514.484	532.698	1692.19	1470.3	507.783	501.119	841	749.434	626.066	596.512	663.346	45	1543.53	796.136	514.694		1186.59	715.003	954.94	630.424		2285		2088	2084	549	2085		2574	2173	1994		2096	2649
514.659	532.721	1754.01	1532.03	508.219	501.145	983	774.228	629.693	599.36	667.625		1716.04	805.857	514.823		2400.47	753.537	975.589	634.129		2492		2106	2095	556	2124		2686	2244	1995		2130	2655
514.85	537.593	1789.05	1542.5	509.031	501.237	997	792.191	631.839	601.66	669.645		1871.34	1098.79	515.529		2500.34	761.605	976.681	644.052		2563		2108	2120	565	2142		2768	2428	2031		2145	2655
515.568	540.659	1796.68	1574.81	509.527	504.899	1003	816.953	633.479	603.962	680.735		1931.28	1170.93	517.848			765.098	1031.85	646.986		2579		2127	2124	594	2158		2813	2433	2071		2216	2680
518.402	546.077	1804.26	1888.33	509.555	505.171	1049	820.012	638.669	618.251	689.258		1977.88	1174.2	518.866			825.772	1208.2	652.767		2584		2141	2155	620	2437		2854	2657	2340		2596	2708
521.383	548.94	1842.5	1954.43	509.985	505.918	1499	824.507	639.862	642.467	689.481		1982.71	1201.58	519.032			872.875	1784.21	652.897		2609		2598	2158	642	2621		3034	2661	2480		2610	2727
521.404	550.517	1902.8	2036.69	511.128	506.33	1721	829.911	643.218	643.428	719.689		2046.08	1223.3	519.515			928.259	1788.57	653.686		2614		2638	2263	1732	2683		3086	2672	2505		2679	2740
521.744	551.705	1915.59	2038.47	511.788	507.325	1737	830.582	647.081	653.821	720.706		2477.85	1228.17	521.486			1205	1800.78	657.123		2684		2639	2538	2029	2684		3164	2763	2705		2685	3105
530.873	555.401	1924.57	2050.02	512.38	507.977	1753	834.224	654.796	656.888	727.472		2496.79	1366.28	528.161			1513.2	1871.54	657.868		2746		2646	2649	2157	2743		3394	2777	3021		2690	3245
531.916	555.477	1924.61	2050.4	512.726	508.129	1763	840.425	657.485	679.868	752.458		2551.68	1388.37	530.32			1716.91	1874.38	666.027		2922		2671	2664	2175	2776			2805			2697
532.709	560.795	1925.44	2061.03	513.512	509.055	1772	888.843	659.931	687.891	754.873		2588.32	1438.06	531.588			1827.43	1878.27	668.005				2691	2703	2263	2779			2874
533.66	563.039	1971.28	2082.43	513.929	509.233	1841	932.112	660.475	719.903	767.384		2614.22	1507.41	537.832			1846.72	1883.05	669.493				2811	3329	2463	2791			2946
534.296	564.2	2007.13	2095.2	514.427	511.528	1868	954.12	662.072	743.763	811.677		2615.43	1519.51	542.34			1859.41	1887.92	669.652				2831	3365	2687	3366			3040
540.2	617.316	2034.73	2106.34	514.661	512.336	1870	983.384	665.366	764.099	814.735		2643.48	1780.06	542.44			1866.92	1895.08	671.618					3466		3486
549.672	619.972	2049.74	2117.24	515.687	512.48	1882	997.948	665.584	770.258	829.632		2675.94	1823.15	551.685			1876.7	1897.59	672.637
556.824	622.356	2056.45	2130.95	515.828	512.757	1894	1028.72	668.031	814.406	831.087		2694.21	1851.41	554.175			1889.58	1900.62	674.278
572.301	624.935	2076.26	2132.2	523.799	512.866	1941	1030.73	669.823	817.139	864.191		61	1887.1	560.537			1892.07	1902.2	675.241
574.592	625.648	2091.38	2133.27	526.536	514.959	1983	1073.75	670.535	984.336	891.948			1959.14	574.462			1893.36	1904.73	677.777
582.373	629.226	2104.35	2150.7	529.083	518.182	1992	1099.3	673.965	1169.08	894.683			1966.34	584.412			1907.2	1905.58	682.659
603.818	633.418	2116.27	2177.34	530.262	520.289	1996	1142.81	682.447	1263.58	928.763			1981.46	621.301			1908.12	1910.55	686.16
605.128	641.736	2321.73	2444.23	531.483	520.757	2002	1163.69	685.077	1344.71	989.505			1984.66	624.479			1916.47	1913.22	688.176
609.44	678.093	2536.78	2587.36	532.264	522.665	2021	1241.65	685.2	1406.03	991.638			1995.86	684.542			1916.97	1929.57	702.977
611.086	683.355	2688.94	2603.01	533.341	523.137	2032	1290.64	686.697	1492.9	1057.6			2001.09	710.282			1917.8	1930.11	714.091
612.173	685.655	2691.77	2644.22	535.277	523.537	2040	1380.64	688.561	1494.92	1100.93			2018.16	835.696			1919.26	1930.17	715.588
618.824	691.987	2709.26	2649.36	537.166	525.401	2043	1448.4	689.581	1536.4	1420.72			2023.02	1165.37			1921.55	1936.01	756.471
619.066	732.007	2720.78	2676.53	537.501	525.905	2050	1497.27	703.571	1559.72	1671.89			2024.71	1402.45			1937.58	1936.37	759.102
621.554	759.73	2746.67	2913.85	538.92	526.197	2058	1550.48	705.657	1619.06	1694.18			2034.34	1484			1940.58	1939.01	760.941
625.041	838.184	2795.15	2918.76	539.435	526.602	2077	1651.92	710.112	1791.86	1893.91			2035.74	72			1942.05	1956.21	762.767
628.769	960.583	2868.25		541.301	527.806	2106	1791.43	717.266	1878.04	1923.18			2043.71				1946.38	1967.05	765.168
631.736	1952.65	3011.84		543.519	527.876	2120	1844.31	757.884	1889.15	1948.31			2052.28				1949.92	1976.25	782.042
634.472	1980.74	3202.65		544.844	530.054	2179	1868.02	817.819	1959.6	2006.01			2062.49				1983.94	1995.38	790.888
638.077	2224.42	3306.17		548.599	530.44	2187	1894.27	836.247	1969.16	2016.8			2064.73				2009.95	1997.15	822.096
644.553				550.964	531.574	2194	1905.36	847.576	1988.86	2037.28			2076.74				2039.74	2000.67	825.526
669.308				552.155	533.811	2194	1905.87	874.722	2025.12	2041.09			2079.18				2041.81	2004.04	874.579
675.108				553.258	534.439	2545	1917.18	962.013	2036.03	2042.3			2081.28				2045.63	2011.62	889.466
689.811				555.636	535.895	2730	1926.17	982.083	2039.88	2054.02			2089.56				2078.87	2012.81	919.166
705.167				563.416	537.283	2751	1943.98	986.335	2064.52	2089.16			2089.83				2103.51	2036.3	957.502
774.471				626.441	539.467	2769	1944.22	987.786	2071.98	2099.5			2114.04				2118.77	2037.66	989.749
782.22				713.511	541.665		1946.68	991.154	2072.2	2129.99			2116.89				2151.07	2055.05	994.579
852.138				839.387	548.429		1962.61	993.351	2087.56	2217.15			2121.8				2174.57	2075.78	1097.1
940.227				1835.12	549.69		1979.66	1030.25	2096.83	2395.93			2136.19				2414.15	2077.67	1204.84
965.703				2047.64	556.769		1994.49	1172.98	2115.08	2620.9			2137.85				2626.45	2078.02	1667.55
975.365				2069.78	558.155		2007.48	1181.94	2117.2	2669.17			2158.53				2781.46	2082.86	1793.93
995.238					559.278		2023.61	1546.21	2121.4	2727.25			2212.1				2804.25	2083.93	1850.83
1049.66					560.409		2049.3	1576.18	2126.94	2741.93			2395.39				2826.02	2091.88	1853.26
1063.44					590.246		2071.78	1845.8	2137.51	2955.11			2480.23				2831.15	2105.81	1855.39
1102.88					591.334		2073.09	1850.15	2141.83	3290.26			2565.58				3248.49	2110.05	1863.99
2156.89					592.05		2074.8	1861.52	2142.56	92			2572.7					2119.23	1892.97
					604.488		2078.54	1870.73	2204.65				2589.78					2153.67	1894.61
					605.338		2082.54	1885.48	2215.19				2700.65					2171.75	1919.63
					622.103		2091.23	1920.05	2286.06				2714.03					2189.36	1928.6
					651.26		2093.44	1926.31	2556.08				2718.55					2259.83	1930.18
					1831.05		2101.35	1943.19	2563.03				97					2426.73	1941.98
					2120.3		2143.35	1970.52	2615.35									2539.41	1962.05
					2827.61		2152.86	2063.87	2678.66									2563.9	1978.17
							2176.05	2093.89	2692.72									2574.99	1978.51
							2188.17	2139.6	2753.18									2582.05	2007.64
							2221.2	2161.39	2761.63									2666.76	2018.56
							2340.66	2222.47	2846.47									2682.85	2022.4
							2424.64	2367.04	2883.57									2684.01	2026.42
							2437.46	2372.67	2885.76									2684.38	2055.96
							2589.9	2556.13	2957.66									2713.73	2058.85
							2591.34	2580.33	3068.53									2721.91	2069.16
							2629.83	2624.51	3618.82									2805.23	2079.84
							2725.68	2634.28										2805.62	2080.1
							2741.41	2646.18										3082.03	2101.7
							3373.01	2672.86											2144.88
								2700.24											2201.37
								2716.45											2422.66
								2772.9											2481.68
								3342.36											2508.64
																			2531.96
																			2591.54
																			2666.96
																			2774.27
																			2776.54
																			2807.34
																			2859.93
																			3014.82
																			3106.63

## Sheet: NEW DATA CUMUL PROB
CR-ZR-01		MEI-ZR-01		GIM-ZR-01		PICON-2		P-381		P-385		MIR-41		AD-PO-49		AD-PO-57		AD-PO-66		AD-PO-55		EC-PO-419		AD-PO-48B		EC-PO-293		EC-PO-337
age	cumul. prob.	age	cumul. prob.	age	cumul. prob.	age	cumul. prob.	age	cumul. prob.	age	cumul. prob.	age	cumul. prob.	age	cumul. prob.	age	cumul. prob.	age	cumul. prob.	age	cumul. prob.	age	cumul. prob.	age	cumul. prob.	age	cumul. prob.	age	cumul. prob.
439.063	0.0107527	442.99	0.012987	326.629	0.012987	349.7	0.0136986	455.688	0.0113636	468.317	0.01	368.7	0.0120482	467.767	0.00892857	368.355	0.00862069	431.339	0.00917431	443.586	0.0108696	433.256	0.0222222	355.334	0.0163934	426.497	0.0103093	435.133	0.0138889
451.904	0.0215054	467.276	0.025974	350.643	0.025974	354.762	0.0273973	456.763	0.0227273	473.568	0.02	478.7	0.0240964	518.779	0.0178571	369.333	0.0172414	465.274	0.0183486	463.345	0.0217391	440.956	0.0444444	375.284	0.0327869	446.446	0.0206186	441.898	0.0277778
461.975	0.0322581	473.326	0.038961	351.015	0.038961	356.086	0.0410959	461.926	0.0340909	474.134	0.03	492.9	0.0361446	548.518	0.0267857	373.179	0.0258621	472.127	0.0275229	476.906	0.0326087	445.259	0.0666667	545.858	0.0491803	476.573	0.0309278	447.153	0.0416667
466.353	0.0430108	484.995	0.0519481	358.75	0.0519481	358.518	0.0547945	463.075	0.0454545	474.212	0.04	495.9	0.0481928	555.067	0.0357143	375.88	0.0344828	479.319	0.0366972	478.752	0.0434783	446.197	0.0888889	550.867	0.0655738	482.082	0.0412371	461.71	0.0555556
467.025	0.0537634	485.278	0.0649351	369.418	0.0649351	359.614	0.0684932	463.74	0.0568182	475.446	0.05	500.1	0.060241	562.698	0.0446429	467.074	0.0431034	481.15	0.0458716	479.045	0.0543478	446.348	0.111111	566.469	0.0819672	489.983	0.0515464	466.738	0.0694444
468.807	0.0645161	486.251	0.0779221	375.299	0.0779221	369.538	0.0821918	466.633	0.0681818	475.773	0.06	512.6	0.0722892	572.304	0.0535714	492.263	0.0517241	494.051	0.0550459	489.55	0.0652174	450.185	0.133333	572.984	0.0983607	494.204	0.0618557	470.339	0.0833333
469.019	0.0752688	487.563	0.0909091	384.066	0.0909091	372.914	0.0958904	467.056	0.0795455	477.774	0.07	551.6	0.0843373	573.815	0.0625	495.714	0.0603448	494.136	0.0642202	493.066	0.076087	455.243	0.155556	601.998	0.114754	495.716	0.0721649	470.93	0.0972222
473.897	0.0860215	489.91	0.103896	385.862	0.103896	376.01	0.109589	471.532	0.0909091	478.988	0.08	554	0.0963855	575.556	0.0714286	498.564	0.0689655	494.289	0.0733945	495.685	0.0869565	460.872	0.177778	613.029	0.131148	500.483	0.0824742	472.125	0.111111
476.044	0.0967742	490.904	0.116883	463.063	0.116883	376.048	0.123288	477.058	0.102273	479.913	0.09	554.2	0.108434	579.481	0.0803571	517.506	0.0775862	495.144	0.0825688	526.869	0.0978261	461.812	0.2	615.112	0.147541	501.779	0.0927835	473.002	0.125
477.879	0.107527	491.774	0.12987	503.455	0.12987	379.055	0.136986	480.591	0.113636	483.089	0.1	555.1	0.120482	580.699	0.0892857	536.511	0.0862069	495.657	0.0917431	564.621	0.108696	462.186	0.222222	618.209	0.163934	520.732	0.103093	473.232	0.138889
478.932	0.11828	491.889	0.142857	507.829	0.142857	381.329	0.150685	482.565	0.125	485.393	0.11	566.3	0.13253	592.202	0.0982143	539.111	0.0948276	496.551	0.100917	566.523	0.119565	462.843	0.244444	627.299	0.180328	531.57	0.113402	474.865	0.152778
479.719	0.129032	492.435	0.155844	509.502	0.155844	382.558	0.164384	483.143	0.136364	485.838	0.12	572.7	0.144578	598.538	0.107143	543.803	0.103448	500.953	0.110092	571.128	0.130435	465.619	0.266667	650.195	0.196721	532.457	0.123711	478.218	0.166667
480.269	0.139785	493.25	0.168831	520.666	0.168831	388.452	0.178082	485.056	0.147727	485.841	0.13	573	0.156627	614.575	0.116071	553.277	0.112069	501.123	0.119266	580.269	0.141304	467.079	0.288889	655.781	0.213115	537.029	0.134021	479.356	0.180556
480.538	0.150538	493.708	0.181818	522.904	0.181818	461.001	0.191781	485.396	0.159091	486.749	0.14	576	0.168675	616.238	0.125	553.368	0.12069	505.478	0.12844	583.252	0.152174	467.719	0.311111	657.19	0.229508	537.157	0.14433	479.813	0.194444
480.69	0.16129	493.945	0.194805	528.926	0.194805	466.384	0.205479	485.445	0.170455	487.114	0.15	577.1	0.180723	616.782	0.133929	559.325	0.12931	506.26	0.137615	583.566	0.163043	467.98	0.333333	657.583	0.245902	538.928	0.154639	480.6	0.208333
482.634	0.172043	494.102	0.207792	528.929	0.207792	483.329	0.219178	486.604	0.181818	487.386	0.16	578.7	0.192771	618.856	0.142857	566.079	0.137931	507.956	0.146789	589.527	0.173913	469.001	0.355556	664.276	0.262295	539.586	0.164948	482.089	0.222222
482.93	0.182796	494.864	0.220779	529.393	0.220779	487.044	0.232877	487.835	0.193182	487.412	0.17	582.1	0.204819	621.718	0.151786	570.718	0.146552	508.649	0.155963	594.216	0.184783	469.947	0.377778	673.342	0.278689	542.234	0.175258	483.46	0.236111
483.609	0.193548	495.58	0.233766	534.064	0.233766	505.281	0.246575	489.942	0.204545	487.569	0.18	588	0.216867	627.574	0.160714	570.87	0.155172	509.074	0.165138	595.248	0.195652	470.042	0.4	673.555	0.295082	544.888	0.185567	484.746	0.25
483.788	0.204301	497.157	0.246753	534.155	0.246753	523.83	0.260274	491.121	0.215909	487.87	0.19	590	0.228916	628.357	0.169643	571.555	0.163793	514.896	0.174312	597.547	0.206522	470.468	0.422222	674.311	0.311475	548.521	0.195876	486.04	0.263889
484.597	0.215054	497.632	0.25974	536.666	0.25974	524.099	0.273973	491.245	0.227273	489.958	0.2	591.2	0.240964	628.414	0.178571	573.951	0.172414	516.109	0.183486	597.611	0.217391	470.513	0.444444	677.389	0.327869	553.6	0.206186	487.102	0.277778
484.755	0.225806	498.894	0.272727	542.506	0.272727	530.13	0.287671	492.878	0.238636	490.374	0.21	598.2	0.253012	628.47	0.1875	575.054	0.181034	518.125	0.192661	601.089	0.228261	471.019	0.466667	682.531	0.344262	555.846	0.216495	487.838	0.291667
485.471	0.236559	499.422	0.285714	548.7	0.285714	544.011	0.30137	492.991	0.25	490.569	0.22	600.4	0.26506	634.182	0.196429	577.702	0.189655	519.065	0.201835	601.723	0.23913	471.602	0.488889	685.862	0.360656	565.379	0.226804	489.545	0.305556
486.03	0.247312	501.371	0.298701	550.398	0.298701	549.965	0.315068	494.321	0.261364	491.153	0.23	602.4	0.277108	634.195	0.205357	578.474	0.198276	520.406	0.211009	601.895	0.25	473.294	0.511111	694.581	0.377049	565.384	0.237113	489.595	0.319444
486.221	0.258065	503.93	0.311688	552.533	0.311688	552.322	0.328767	494.381	0.272727	491.329	0.24	605	0.289157	636.075	0.214286	584.653	0.206897	522.488	0.220183	604.432	0.26087	474.786	0.533333	695.23	0.393443	567.221	0.247423	490.012	0.333333
487.04	0.268817	504.969	0.324675	554.069	0.324675	553.466	0.342466	494.873	0.284091	491.631	0.25	606.9	0.301205	641.263	0.223214	585.389	0.215517	534.459	0.229358	605.429	0.271739	475.5	0.555556	708.57	0.409836	568.233	0.257732	490.424	0.347222
487.423	0.27957	505.629	0.337662	555.607	0.337662	555.616	0.356164	496.462	0.295455	491.761	0.26	612	0.313253	641.998	0.232143	586.456	0.224138	535.934	0.238532	605.84	0.282609	476.993	0.577778	709.193	0.42623	574.834	0.268041	491.156	0.361111
488.15	0.290323	507.005	0.350649	558.927	0.350649	556.336	0.369863	497.32	0.306818	492.483	0.27	621.3	0.325301	648.012	0.241071	587.908	0.232759	546.019	0.247706	606.656	0.293478	477.981	0.6	722.248	0.442623	577.399	0.278351	491.688	0.375
489.352	0.301075	507.158	0.363636	566.424	0.363636	567.64	0.383562	497.556	0.318182	492.546	0.28	622.5	0.337349	648.84	0.25	593.212	0.241379	547.377	0.256881	615.842	0.304348	478.385	0.622222	723.287	0.459016	589.441	0.28866	491.964	0.388889
490.073	0.311828	508.357	0.376623	573.211	0.376623	573.012	0.39726	498.153	0.329545	492.953	0.29	623.7	0.349398	650.993	0.258929	593.331	0.25	547.74	0.266055	616.619	0.315217	481.281	0.644444	725.173	0.47541	600.579	0.298969	492.648	0.402778
491.012	0.322581	508.643	0.38961	573.318	0.38961	579.08	0.410959	500	0.340909	493.284	0.3	625	0.361446	657.438	0.267857	599.199	0.258621	549.421	0.275229	617.497	0.326087	482.38	0.666667	732.017	0.491803	608.809	0.309278	494.625	0.416667
492.585	0.333333	508.724	0.402597	580.248	0.402597	584.195	0.424658	500.361	0.352273	493.578	0.31	626.3	0.373494	658.015	0.276786	601.923	0.267241	551.332	0.284404	618.51	0.336957	486.312	0.688889	741.099	0.508197	615.81	0.319588	495.997	0.430556
492.829	0.344086	512.472	0.415584	583.79	0.415584	595.009	0.438356	500.567	0.363636	494.56	0.32	630.3	0.385542	659.29	0.285714	602.357	0.275862	554.138	0.293578	619.443	0.347826	488.109	0.711111	741.418	0.52459	617.69	0.329897	496.674	0.444444
493.928	0.354839	515.506	0.428571	585.255	0.428571	621.592	0.452055	500.85	0.375	494.792	0.33	632	0.39759	664.938	0.294643	602.728	0.284483	554.25	0.302752	621.047	0.358696	489.853	0.733333	750.711	0.540984	617.865	0.340206	496.867	0.458333
495.975	0.365591	515.594	0.441558	589.68	0.441558	621.665	0.465753	501.148	0.386364	494.855	0.34	637	0.409639	666.343	0.303571	603.629	0.293103	555.228	0.311927	621.081	0.369565	489.936	0.755556	761.978	0.557377	619.476	0.350515	497.316	0.472222
498.548	0.376344	516.976	0.454545	598.142	0.454545	625.79	0.479452	501.771	0.397727	495.798	0.35	641.3	0.421687	668.735	0.3125	604.276	0.301724	561.166	0.321101	624.699	0.380435	497.305	0.777778	781.546	0.57377	627.12	0.360825	497.474	0.486111
499.807	0.387097	518.005	0.467532	607.609	0.467532	665.382	0.493151	502.096	0.409091	495.986	0.36	644.7	0.433735	670.757	0.321429	604.379	0.310345	564.898	0.330275	625.704	0.391304	497.437	0.8	792.396	0.590164	629.121	0.371134	498.562	0.5
506.32	0.397849	518.145	0.480519	612.135	0.480519	681.447	0.506849	502.75	0.420455	496.133	0.37	645.7	0.445783	681.24	0.330357	605.832	0.318966	566.39	0.33945	628.413	0.402174	501.043	0.822222	813.375	0.606557	633.445	0.381443	503.579	0.513889
506.418	0.408602	519.39	0.493506	616.901	0.493506	705.003	0.520548	503.813	0.431818	496.637	0.38	646.8	0.457831	681.848	0.339286	606.964	0.327586	569.088	0.348624	633.198	0.413043	502.645	0.844444	866.074	0.622951	639.12	0.391753	504.784	0.527778
506.81	0.419355	521.593	0.506494	631.557	0.506494	717.32	0.534247	504.872	0.443182	496.673	0.39	649.1	0.46988	690.012	0.348214	611.609	0.336207	569.229	0.357798	636.727	0.423913	508.568	0.866667	879.644	0.639344	641.029	0.402062	507.11	0.541667
507.509	0.430108	524.502	0.519481	634.813	0.519481	737.813	0.547945	505.003	0.454545	497.02	0.4	650.5	0.481928	702.561	0.357143	612.735	0.344828	574.311	0.366972	637.796	0.434783	510.306	0.888889	887.526	0.655738	650.397	0.412371	508.54	0.555556
507.583	0.44086	524.685	0.532468	693.56	0.532468	843.009	0.561644	505.255	0.465909	497.263	0.41	654	0.493976	702.619	0.366071	615.083	0.353448	576.787	0.376147	643.101	0.445652	517.84	0.911111	982.76	0.672131	661.272	0.42268	509.04	0.569444
508.219	0.451613	525.084	0.545455	885.678	0.545455	879.935	0.575342	505.492	0.477273	497.738	0.42	655.1	0.506024	717.115	0.375	619.166	0.362069	586.281	0.385321	645.084	0.456522	595.153	0.933333	996.355	0.688525	664.834	0.43299	510.271	0.583333
509.158	0.462366	525.538	0.558442	1208.59	0.558442	1100.38	0.589041	505.723	0.488636	498.051	0.43	666	0.518072	734.54	0.383929	620.13	0.37069	587.941	0.394495	647.27	0.467391	614.16	0.955556	1014.75	0.704918	682.634	0.443299	510.65	0.597222
510.444	0.473118	525.839	0.571429	1368.79	0.571429	1144.95	0.60274	505.827	0.5	500.105	0.44	670	0.53012	736.065	0.392857	623.306	0.37931	594.189	0.40367	655.041	0.478261	638.948	0.977778	1089.76	0.721311	699.031	0.453608	512.657	0.611111
511.948	0.483871	527.169	0.584416	1490.02	0.584416	1177.08	0.616438	507.439	0.511364	500.41	0.45	755	0.542169	740.351	0.401786	625.764	0.387931	594.271	0.412844	656.871	0.48913	694.79	1	1492.38	0.737705	775.371	0.463918	514.478	0.625
514.484	0.494624	532.698	0.597403	1692.19	0.597403	1470.3	0.630137	507.783	0.522727	501.119	0.46	841	0.554217	749.434	0.410714	626.066	0.396552	596.512	0.422018	663.346	0.5	45		1543.53	0.754098	796.136	0.474227	514.694	0.638889
514.659	0.505376	532.721	0.61039	1754.01	0.61039	1532.03	0.643836	508.219	0.534091	501.145	0.47	983	0.566265	774.228	0.419643	629.693	0.405172	599.36	0.431193	667.625	0.51087			1716.04	0.770492	805.857	0.484536	514.823	0.652778
514.85	0.516129	537.593	0.623377	1789.05	0.623377	1542.5	0.657534	509.031	0.545455	501.237	0.48	997	0.578313	792.191	0.428571	631.839	0.413793	601.66	0.440367	669.645	0.521739			1871.34	0.786885	1098.79	0.494845	515.529	0.666667
515.568	0.526882	540.659	0.636364	1796.68	0.636364	1574.81	0.671233	509.527	0.556818	504.899	0.49	1003	0.590361	816.953	0.4375	633.479	0.422414	603.962	0.449541	680.735	0.532609			1931.28	0.803279	1170.93	0.505155	517.848	0.680556
518.402	0.537634	546.077	0.649351	1804.26	0.649351	1888.33	0.684932	509.555	0.568182	505.171	0.5	1049	0.60241	820.012	0.446429	638.669	0.431034	618.251	0.458716	689.258	0.543478			1977.88	0.819672	1174.2	0.515464	518.866	0.694444
521.383	0.548387	548.94	0.662338	1842.5	0.662338	1954.43	0.69863	509.985	0.579545	505.918	0.51	1499	0.614458	824.507	0.455357	639.862	0.439655	642.467	0.46789	689.481	0.554348			1982.71	0.836066	1201.58	0.525773	519.032	0.708333
521.404	0.55914	550.517	0.675325	1902.8	0.675325	2036.69	0.712329	511.128	0.590909	506.33	0.52	1721	0.626506	829.911	0.464286	643.218	0.448276	643.428	0.477064	719.689	0.565217			2046.08	0.852459	1223.3	0.536082	519.515	0.722222
521.744	0.569892	551.705	0.688312	1915.59	0.688312	2038.47	0.726027	511.788	0.602273	507.325	0.53	1737	0.638554	830.582	0.473214	647.081	0.456897	653.821	0.486239	720.706	0.576087			2477.85	0.868852	1228.17	0.546392	521.486	0.736111
530.873	0.580645	555.401	0.701299	1924.57	0.701299	2050.02	0.739726	512.38	0.613636	507.977	0.54	1753	0.650602	834.224	0.482143	654.796	0.465517	656.888	0.495413	727.472	0.586957			2496.79	0.885246	1366.28	0.556701	528.161	0.75
531.916	0.591398	555.477	0.714286	1924.61	0.714286	2050.4	0.753425	512.726	0.625	508.129	0.55	1763	0.662651	840.425	0.491071	657.485	0.474138	679.868	0.504587	752.458	0.597826			2551.68	0.901639	1388.37	0.56701	530.32	0.763889
532.709	0.602151	560.795	0.727273	1925.44	0.727273	2061.03	0.767123	513.512	0.636364	509.055	0.56	1772	0.674699	888.843	0.5	659.931	0.482759	687.891	0.513761	754.873	0.608696			2588.32	0.918033	1438.06	0.57732	531.588	0.777778
533.66	0.612903	563.039	0.74026	1971.28	0.74026	2082.43	0.780822	513.929	0.647727	509.233	0.57	1841	0.686747	932.112	0.508929	660.475	0.491379	719.903	0.522936	767.384	0.619565			2614.22	0.934426	1507.41	0.587629	537.832	0.791667
534.296	0.623656	564.2	0.753247	2007.13	0.753247	2095.2	0.794521	514.427	0.659091	511.528	0.58	1868	0.698795	954.12	0.517857	662.072	0.5	743.763	0.53211	811.677	0.630435			2615.43	0.95082	1519.51	0.597938	542.34	0.805556
540.2	0.634409	617.316	0.766234	2034.73	0.766234	2106.34	0.808219	514.661	0.670455	512.336	0.59	1870	0.710843	983.384	0.526786	665.366	0.508621	764.099	0.541284	814.735	0.641304			2643.48	0.967213	1780.06	0.608247	542.44	0.819444
549.672	0.645161	619.972	0.779221	2049.74	0.779221	2117.24	0.821918	515.687	0.681818	512.48	0.6	1882	0.722892	997.948	0.535714	665.584	0.517241	770.258	0.550459	829.632	0.652174			2675.94	0.983607	1823.15	0.618557	551.685	0.833333
556.824	0.655914	622.356	0.792208	2056.45	0.792208	2130.95	0.835616	515.828	0.693182	512.757	0.61	1894	0.73494	1028.72	0.544643	668.031	0.525862	814.406	0.559633	831.087	0.663043			2694.21	1	1851.41	0.628866	554.175	0.847222
572.301	0.666667	624.935	0.805195	2076.26	0.805195	2132.2	0.849315	523.799	0.704545	512.866	0.62	1941	0.746988	1030.73	0.553571	669.823	0.534483	817.139	0.568807	864.191	0.673913			61		1887.1	0.639175	560.537	0.861111
574.592	0.677419	625.648	0.818182	2091.38	0.818182	2133.27	0.863014	526.536	0.715909	514.959	0.63	1983	0.759036	1073.75	0.5625	670.535	0.543103	984.336	0.577982	891.948	0.684783					1959.14	0.649485	574.462	0.875
582.373	0.688172	629.226	0.831169	2104.35	0.831169	2150.7	0.876712	529.083	0.727273	518.182	0.64	1992	0.771084	1099.3	0.571429	673.965	0.551724	1169.08	0.587156	894.683	0.695652					1966.34	0.659794	584.412	0.888889
603.818	0.698925	633.418	0.844156	2116.27	0.844156	2177.34	0.890411	530.262	0.738636	520.289	0.65	1996	0.783133	1142.81	0.580357	682.447	0.560345	1263.58	0.59633	928.763	0.706522					1981.46	0.670103	621.301	0.902778
605.128	0.709677	641.736	0.857143	2321.73	0.857143	2444.23	0.90411	531.483	0.75	520.757	0.66	2002	0.795181	1163.69	0.589286	685.077	0.568966	1344.71	0.605505	989.505	0.717391					1984.66	0.680412	624.479	0.916667
609.44	0.72043	678.093	0.87013	2536.78	0.87013	2587.36	0.917808	532.264	0.761364	522.665	0.67	2021	0.807229	1241.65	0.598214	685.2	0.577586	1406.03	0.614679	991.638	0.728261					1995.86	0.690722	684.542	0.930556
611.086	0.731183	683.355	0.883117	2688.94	0.883117	2603.01	0.931507	533.341	0.772727	523.137	0.68	2032	0.819277	1290.64	0.607143	686.697	0.586207	1492.9	0.623853	1057.6	0.73913					2001.09	0.701031	710.282	0.944444
612.173	0.741935	685.655	0.896104	2691.77	0.896104	2644.22	0.945205	535.277	0.784091	523.537	0.69	2040	0.831325	1380.64	0.616071	688.561	0.594828	1494.92	0.633028	1100.93	0.75					2018.16	0.71134	835.696	0.958333
618.824	0.752688	691.987	0.909091	2709.26	0.909091	2649.36	0.958904	537.166	0.795455	525.401	0.7	2043	0.843373	1448.4	0.625	689.581	0.603448	1536.4	0.642202	1420.72	0.76087					2023.02	0.721649	1165.37	0.972222
619.066	0.763441	732.007	0.922078	2720.78	0.922078	2676.53	0.972603	537.501	0.806818	525.905	0.71	2050	0.855422	1497.27	0.633929	703.571	0.612069	1559.72	0.651376	1671.89	0.771739					2024.71	0.731959	1402.45	0.986111
621.554	0.774194	759.73	0.935065	2746.67	0.935065	2913.85	0.986301	538.92	0.818182	526.197	0.72	2058	0.86747	1550.48	0.642857	705.657	0.62069	1619.06	0.66055	1694.18	0.782609					2034.34	0.742268	1484	1
625.041	0.784946	838.184	0.948052	2795.15	0.948052	2918.76	1	539.435	0.829545	526.602	0.73	2077	0.879518	1651.92	0.651786	710.112	0.62931	1791.86	0.669725	1893.91	0.793478					2035.74	0.752577	72
628.769	0.795699	960.583	0.961039	2868.25	0.961039			541.301	0.840909	527.806	0.74	2106	0.891566	1791.43	0.660714	717.266	0.637931	1878.04	0.678899	1923.18	0.804348					2043.71	0.762887
631.736	0.806452	1952.65	0.974026	3011.84	0.974026			543.519	0.852273	527.876	0.75	2120	0.903614	1844.31	0.669643	757.884	0.646552	1889.15	0.688073	1948.31	0.815217					2052.28	0.773196
634.472	0.817204	1980.74	0.987013	3202.65	0.987013			544.844	0.863636	530.054	0.76	2179	0.915663	1868.02	0.678571	817.819	0.655172	1959.6	0.697248	2006.01	0.826087					2062.49	0.783505
638.077	0.827957	2224.42	1	3306.17	1			548.599	0.875	530.44	0.77	2187	0.927711	1894.27	0.6875	836.247	0.663793	1969.16	0.706422	2016.8	0.836957					2064.73	0.793814
644.553	0.83871							550.964	0.886364	531.574	0.78	2194	0.939759	1905.36	0.696429	847.576	0.672414	1988.86	0.715596	2037.28	0.847826					2076.74	0.804124
669.308	0.849462							552.155	0.897727	533.811	0.79	2194	0.951807	1905.87	0.705357	874.722	0.681034	2025.12	0.724771	2041.09	0.858696					2079.18	0.814433
675.108	0.860215							553.258	0.909091	534.439	0.8	2545	0.963855	1917.18	0.714286	962.013	0.689655	2036.03	0.733945	2042.3	0.869565					2081.28	0.824742
689.811	0.870968							555.636	0.920455	535.895	0.81	2730	0.975904	1926.17	0.723214	982.083	0.698276	2039.88	0.743119	2054.02	0.880435					2089.56	0.835052
705.167	0.88172							563.416	0.931818	537.283	0.82	2751	0.987952	1943.98	0.732143	986.335	0.706897	2064.52	0.752294	2089.16	0.891304					2089.83	0.845361
774.471	0.892473							626.441	0.943182	539.467	0.83	2769	1	1944.22	0.741071	987.786	0.715517	2071.98	0.761468	2099.5	0.902174					2114.04	0.85567
782.22	0.903226							713.511	0.954545	541.665	0.84			1946.68	0.75	991.154	0.724138	2072.2	0.770642	2129.99	0.913043					2116.89	0.865979
852.138	0.913978							839.387	0.965909	548.429	0.85			1962.61	0.758929	993.351	0.732759	2087.56	0.779817	2217.15	0.923913					2121.8	0.876289
940.227	0.924731							1835.12	0.977273	549.69	0.86			1979.66	0.767857	1030.25	0.741379	2096.83	0.788991	2395.93	0.934783					2136.19	0.886598
965.703	0.935484							2047.64	0.988636	556.769	0.87			1994.49	0.776786	1172.98	0.75	2115.08	0.798165	2620.9	0.945652					2137.85	0.896907
975.365	0.946237							2069.78	1	558.155	0.88			2007.48	0.785714	1181.94	0.758621	2117.2	0.807339	2669.17	0.956522					2158.53	0.907216
995.238	0.956989									559.278	0.89			2023.61	0.794643	1546.21	0.767241	2121.4	0.816514	2727.25	0.967391					2212.1	0.917526
1049.66	0.967742									560.409	0.9			2049.3	0.803571	1576.18	0.775862	2126.94	0.825688	2741.93	0.978261					2395.39	0.927835
1063.44	0.978495									590.246	0.91			2071.78	0.8125	1845.8	0.784483	2137.51	0.834862	2955.11	0.98913					2480.23	0.938144
1102.88	0.989247									591.334	0.92			2073.09	0.821429	1850.15	0.793103	2141.83	0.844037	3290.26	1					2565.58	0.948454
2156.89	1									592.05	0.93			2074.8	0.830357	1861.52	0.801724	2142.56	0.853211	92						2572.7	0.958763
										604.488	0.94			2078.54	0.839286	1870.73	0.810345	2204.65	0.862385							2589.78	0.969072
										605.338	0.95			2082.54	0.848214	1885.48	0.818966	2215.19	0.87156							2700.65	0.979381
										622.103	0.96			2091.23	0.857143	1920.05	0.827586	2286.06	0.880734							2714.03	0.989691
										651.26	0.97			2093.44	0.866071	1926.31	0.836207	2556.08	0.889908							2718.55	1
										1831.05	0.98			2101.35	0.875	1943.19	0.844828	2563.03	0.899083							97
										2120.3	0.99			2143.35	0.883929	1970.52	0.853448	2615.35	0.908257
										2827.61	1			2152.86	0.892857	2063.87	0.862069	2678.66	0.917431
														2176.05	0.901786	2093.89	0.87069	2692.72	0.926606
														2188.17	0.910714	2139.6	0.87931	2753.18	0.93578
														2221.2	0.919643	2161.39	0.887931	2761.63	0.944954
														2340.66	0.928571	2222.47	0.896552	2846.47	0.954128
														2424.64	0.9375	2367.04	0.905172	2883.57	0.963303
														2437.46	0.946429	2372.67	0.913793	2885.76	0.972477
														2589.9	0.955357	2556.13	0.922414	2957.66	0.981651
														2591.34	0.964286	2580.33	0.931034	3068.53	0.990826
														2629.83	0.973214	2624.51	0.939655	3618.82	1
														2725.68	0.982143	2634.28	0.948276
														2741.41	0.991071	2646.18	0.956897
														3373.01	1	2672.86	0.965517
																2700.24	0.974138
																2716.45	0.982759
																2772.9	0.991379
																3342.36	1

## Sheet: Published data NW Iberia
SYNOROGENICS NW IBERIA (Dias da Silva et al. 2015)																							SYNOROGENICS NW IBERIA (Martínez Catalán et al., 2004, 2008, 2016)
EASTERN RIM OF THE MORAIS COMPLEX																							SIL SYNCLINE					Alcañices SYNCLINE
VC21	48					VC45	92				VC57	111					SALD01	125					SO-1; SO-2	55				SO-4	58				SO-5	59				SO-6	58				SO-7	59				SO-8	54
Age	1s	conc.	CUM PROB			Age	1s	conc.	CUM PROB		Age	1s	conc.	CUM PROB			Age	1s	conc.	CUM PROB			Age	1s	conc.	CUM PROB		Age	1s	conc.	CUM PROB		Age	1s	conc.	CUM PROB		Age	1s	conc.	CUM PROB		Age	1s	conc.	CUM PROB		Age	1s
323.14	6.56882	99.3641	0.0208333			527.545	8.81456	94.068	0.0108696		532.767	6.46395	90.466	0.00900901			485.354	8.82746	89.9559	0.008			341	11	86.1111			380	4	99.2167	0.0172414		355	4	94.6667	0.0169492		378	3	99.2126	0.0172414		1946	24	89.1059			2662	20
385.024	5.54638	104.186	0.0416667			528.498	11.5614	94.8426	0.0217391		549.472	10.2401	91.6839	0.018018			485.793	11.8344	90.1488	0.016			544	13	88.3117			448	5	91.6155	0.0344828		360	3	96.2567	0.0338983		386	3	99.4845	0.0344828		552	5	97.1831	0.0169492		546	5
388.628	7.45421	106.864	0.0625			543.379	8.76943	93.8991	0.0326087		562.815	10.3523	99.6809	0.027027			501.885	29.7368	90.3923	0.024			2184	32	88.5073			484	4	99.384	0.0517241		476	4	99.1667	0.0508475		386	3	100	0.0517241		553	4	99.4604	0.0338983		561	6
395.697	6.35071	100.317	0.0833333			557.105	7.56875	95.7	0.0434783		566.306	7.07365	93.028	0.036036			521.244	22.3682	90.7206	0.032			2450	17	89.0612			489	4	99.7959	0.0689655		482	4	99.5868	0.0677966		387	3	100	0.0689655		571	5	99.8252	0.0508475		1592	51
400.975	6.82098	101.169	0.104167			557.498	9.10769	96.6215	0.0543478		569.951	7.62638	107.806	0.045045			540.26	17.2885	91.2462	0.04			477	10	89.4934			490	4	99.7963	0.0862069		489	4	100	0.0847458		393	4	99.7462	0.0862069		574	6	99.6528	0.0677966		624	7
406.163	9.2592	91.3678	0.125			569.2	9.06759	90.2854	0.0652174		571.493	10.244	98.2549	0.0540541			544.104	22.6465	91.2835	0.048			599	11	89.6707			495	4	100	0.103448		533	5	98.7037	0.101695		393	4	100	0.103448		574	6	100	0.0847458		2067	27
426.009	5.41952	109.514	0.145833			572.364	7.63521	97.8761	0.076087		578.835	7.28868	105.311	0.0630631			552.21	46.6886	91.3193	0.056			324	10	99.3865	0.0181818		500	5	92.4214	0.12069		537	5	95.0442	0.118644		394	3	96.5686	0.12069		581	5	96.995	0.101695		609	8
432.895	7.32031	101.635	0.166667			576.953	8.12932	97.9562	0.0869565		581.064	4.73013	97.8648	0.0720721			553.02	8.79321	91.4461	0.064			340	10	92.1409	0.0363636		516	5	100	0.137931		545	5	99.6344	0.135593		395	6	88.964	0.137931		581	5	99.8282	0.118644		572	8
437.23	5.22714	99.498	0.1875			581.843	9.84103	93.8481	0.0978261		583.068	9.46062	96.1941	0.0810811			553.75	8.02594	91.5288	0.072			363	12	104.31	0.0545455		530	5	99.2509	0.155172		545	5	99.6344	0.152542		403	4	100.249	0.155172		582	6	98.8115	0.135593		553	5
447.727	5.3531	96.8985	0.208333			581.983	8.02438	108.979	0.108696		585.07	8.85099	107.967	0.0900901			554.824	7.54546	91.6188	0.08			417	9	109.737	0.0727273		530	5	99.8117	0.172414		557	5	99.8208	0.169492		404	4	99.2629	0.172414		585	5	99.3209	0.152542		557	5
450.713	14.1743	94.4302	0.229167			583.888	10.0884	103.282	0.119565		595.572	7.71811	104.137	0.0990991			556.788	26.8916	91.9606	0.088			476	10	93.7008	0.0909091		531	5	99.4382	0.189655		563	5	99.646	0.186441		430	5	100	0.189655		588	6	99.3243	0.169492		566	8
464.641	6.46932	102.368	0.25			603.975	9.27859	95.0568	0.130435		601.174	4.62263	107.151	0.108108			559.97	9.21683	92.0338	0.096			484	11	93.0769	0.109091		536	5	99.6283	0.206897		563	5	95.4237	0.20339		457	5	99.5643	0.206897		601	6	99.5033	0.186441		571	5
478.593	8.5951	104.125	0.270833			608.762	9.93074	99.4918	0.141304		602.108	7.48976	108.682	0.117117			570.515	7.00734	92.2343	0.104			485	10	101.891	0.127273		538	5	100	0.224138		569	5	99.3019	0.220339		463	5	97.6793	0.224138		604	6	99.67	0.20339		572	5
479.583	10.2366	96.8084	0.291667			610.211	9.40087	96.109	0.152174		603.341	11.128	101.213	0.126126			570.682	14.9759	92.432	0.112			494	10	92.6829	0.145455		540	5	99.8152	0.241379		570	5	99.3031	0.237288		469	4	99.5754	0.241379		608	6	99.6721	0.220339		573	5
481.448	5.56588	90.2874	0.3125			613.826	8.82695	98.4887	0.163043		606.71	7.75016	93.9383	0.135135			570.986	9.9223	92.6019	0.12			499	16	90.0722	0.163636		540	6	95.7447	0.258621		570	5	99.8249	0.254237		469	4	94.9393	0.258621		615	6	99.6759	0.237288		574	5
483.905	8.29481	100.583	0.333333			620.285	9.13793	92.4065	0.173913		613.035	8.29935	101.121	0.144144			570.99	8.08086	92.6219	0.128			499	11	98.6166	0.181818		541	5	93.7608	0.275862		577	6	100	0.271186		474	5	99.7895	0.275862		621	6	99.8392	0.254237		576	5
484.452	10.0621	98.3624	0.354167			622.354	8.58057	100.656	0.184783		617.224	5.91947	94.9373	0.153153			571.053	22.8513	92.6274	0.136			501	11	101.008	0.2		543	7	99.4505	0.293103		583	5	100	0.288136		477	5	93.7132	0.293103		626	7	99.6815	0.271186		591	5
488.104	5.94421	97.175	0.375			622.598	8.73793	90.4912	0.195652		621.064	5.87707	96.4599	0.162162			573.935	7.29511	92.6491	0.144			504	10	104.564	0.218182		543	6	99.2687	0.310345		583	6	99.6581	0.305085		480	4	99.7921	0.310345		628	6	99.0536	0.288136		612	6
490.2	5.04023	92.6156	0.395833			625.174	11.6113	92.5683	0.206522		624.778	6.9609	94.2933	0.171171			574.471	9.58554	92.9359	0.152			512	16	99.8051	0.236364		556	5	99.4633	0.327586		590	7	98.0066	0.322034		488	4	98.9858	0.327586		631	6	99.2138	0.305085		613	6
492.407	6.17961	101.509	0.416667			631.788	9.3753	104.5	0.217391		632.006	9.8889	106.926	0.18018			577.566	17.9992	92.9656	0.16			514	11	93.7956	0.254545		562	5	102.555	0.344828		604	6	99.0164	0.338983		490	5	95.1456	0.344828		645	7	98.9264	0.322034		643	6
496.091	4.47334	103.476	0.4375			635.831	9.57902	99.7454	0.228261		633.59	6.98094	100.445	0.189189			584.747	11.1531	93.2417	0.168			514	9	109.595	0.272727		565	5	94.958	0.362069		609	6	99.6727	0.355932		490	5	98.5915	0.362069		653	6	100	0.338983		643	6
506.989	7.74716	99.1546	0.458333			636.125	14.2989	91.4068	0.23913		634.33	6.51507	99.6648	0.198198			587.3	11.6984	93.6871	0.176			518	10	100	0.290909		570	6	99.8249	0.37931		627	6	93.4426	0.372881		493	5	100	0.37931		662	6	98.3655	0.355932		650	6
510.637	14.3305	93.7308	0.479167			636.426	11.7713	92.072	0.25		639.138	6.47022	104.385	0.207207			592.597	39.1539	93.8436	0.184			525	10	92.5926	0.309091		571	5	100	0.396552		656	7	100	0.389831		497	5	99.5992	0.396552		665	6	99.2537	0.372881		650	6
514.059	8.20465	91.438	0.5			639.265	9.63033	96.0283	0.26087		644.192	10.166	104.569	0.216216			597.675	13.3479	93.9964	0.192			533	10	91.7384	0.327273		571	5	99.1319	0.413793		661	5	99.6983	0.40678		497	4	100	0.413793		733	7	99.4573	0.389831		655	7
521.821	6.29307	100.689	0.520833			644.206	8.64037	102.672	0.271739		656.216	9.15533	101.404	0.225225			598.276	7.37661	94.2897	0.2			534	13	101.328	0.345455		577	5	99.827	0.431034		670	6	99.851	0.423729		498	5	99.7996	0.431034		1630	46	95.6442	0.40678		655	7
536.494	5.82155	104.762	0.541667			644.254	8.68195	101.46	0.282609		657.009	7.05734	96.3359	0.234234			598.416	24.8585	94.4078	0.208			536	10	101.132	0.363636		583	5	100	0.448276		701	7	99.8575	0.440678		498	5	96.325	0.448276		1748	7	99.714	0.423729		662	7
572.24	8.29215	96.3692	0.5625			645.303	9.45935	101.653	0.293478		657.591	5.9002	105.2	0.243243			600.818	17.7381	94.4282	0.216		13	541	10	98.1851	0.381818		608	5	92.9664	0.465517		776	7	100	0.457627		499	5	99.8	0.465517		1834	38	95.3108	0.440678		676	7
574.13	9.28858	95.5793	0.583333			650.858	9.22893	106.554	0.304348		664.445	17.049	108.9	0.252252			602.221	10.945	94.4307	0.224			544	10	94.4444	0.4		613	5	98.7118	0.482759		845	7	98.3702	0.474576		500	5	99.0099	0.482759		1858	15	97.7933	0.457627		695	8
575.061	5.81801	99.1568	0.604167			654.095	8.31163	95.8833	0.315217		666.124	12.3859	103.914	0.261261			606.203	6.28445	94.6176	0.232			544	9	101.682	0.418182		621	5	99.5192	0.5		983	8	98.497	0.491525		500	5	99.2063	0.5		1889	23	95.5003	0.474576		773	7
578.348	8.24232	98.7165	0.625			654.279	10.3364	108.56	0.326087		671.13	10.422	91.3775	0.27027			607.114	10.7424	94.7936	0.24			544	10	105.222	0.436364		625	7	99.5223	0.517241		1029	10	99.8056	0.508475		501	6	98.0431	0.517241		1891	17	99.8414	0.491525		1808	55
580.154	7.82017	97.2296	0.645833			656.515	10.0457	96.3329	0.336957		676.869	9.2604	90.4324	0.279279			609.52	7.99556	94.914	0.248			549	10	102.617	0.454545		628	5	99.5246	0.534483		1495	16	94.7826	0.525424		501	5	99.6024	0.534483		1904	8	100.053	0.508475		1897	34
603.192	5.68785	97.9703	0.666667			656.742	10.2248	94.0162	0.347826		683.022	9.09243	107.533	0.288288			610.451	14.6482	95.0858	0.256			551	10	93.5484	0.472727		630	6	100	0.551724		1499	24	99.1995	0.542373		501	5	99.2079	0.551724		1909	10	96.5951	0.525424		1898	20
611.936	8.28842	104.071	0.6875			656.839	9.63177	97.2027	0.358696		702.928	11.5511	109.902	0.297297			611.277	54.1912	95.1162	0.264			556	9	106.513	0.490909		636	5	100	0.568966		1530	14	100	0.559322		502	5	99.2095	0.568966		1915	14	98.7467	0.542373		1898	21
613.849	5.77133	105.572	0.708333			657.678	13.3063	100.054	0.369565		704.876	7.73356	108.223	0.306306			611.617	8.52017	95.2337	0.272			565	11	103.291	0.509091		646	6	100	0.586207		1806	16	95.2381	0.576271		502	5	97.2868	0.586207		1917	9	97.7047	0.559322		1907	23
626.499	19.8575	102.664	0.729167			657.856	9.94059	96.422	0.380435		715.978	13.4686	102.534	0.315315			615.001	16.7786	95.4138	0.28			595	12	90.8397	0.527273		649	5	99.8462	0.603448		1898	9	98.2086	0.59322		504	5	97.4855	0.603448		1918	10	97.7581	0.576271		1907	15
633.34	9.72534	95.2509	0.75			669.127	7.70649	94.9347	0.391304		719.206	11.3287	107.576	0.324324			616.559	21.7341	95.4302	0.288			637	10	100.315	0.545455		662	6	99.5489	0.62069		1906	16	97.9538	0.610169		504	6	98.6301	0.62069		1934	32	99.2761	0.59322		1913	19
637.758	10.176	100.716	0.770833			669.649	9.69685	109.838	0.402174		740.471	9.45843	109.535	0.333333			617.343	17.274	95.5666	0.296			659	11	98.8006	0.563636		728	7	100.138	0.637931		1913	8	99.8955	0.627119		505	5	99.8024	0.637931		2002	24	95.3546	0.610169		1920	30
645.22	7.41567	100.029	0.791667			670.804	7.97874	107.8	0.413043		748.97	8.05939	92.8299	0.342342			620.081	18.4309	95.6459	0.304			1819	19	98.6256	0.581818		749	8	100	0.655172		2041	8	100.049	0.644068		507	7	95.3008	0.655172		2019	18	94.6508	0.627119		1923	21
649.335	12.8727	93.8528	0.8125			681.559	10.956	98.0168	0.423913		787.74	9.97723	108.594	0.351351			622.721	31.0863	95.6489	0.312			1892	19	95.9831	0.6		1212	11	99.505	0.672414		2044	7	99.8043	0.661017		513	6	100	0.672414		2023	49	97.1824	0.644068		1987	38
667.272	11.2235	103.001	0.833333			689.59	6.38306	108.912	0.434783		831.914	15.8883	97.4786	0.36036			624.168	27.0624	95.7223	0.32			1913	19	90.643	0.618182		1226	10	100	0.689655		2047	8	99.9511	0.677966		514	6	99.2278	0.689655		2029	10	99.9507	0.661017		1991	22
736.673	10.2591	95.9405	0.854167			694.3	10.1959	93.0729	0.445652		840.028	8.00051	108.041	0.369369			624.884	8.5376	95.9332	0.328			1935	23	90.1809	0.636364		1249	12	97.518	0.706897		2062	9	100.145	0.694915		515	5	98.659	0.706897		2030	13	100.246	0.677966		2011	18
745.012	7.72284	104.608	0.875			694.772	10.731	104.755	0.456522		857.407	14.0626	95.3668	0.378378			624.896	22.13	95.9432	0.336			2004	19	94.7106	0.654545		2017	9	99.9504	0.724138		2067	9	99.8549	0.711864		518	6	100	0.724138		2039	9	99.951	0.694915		2049	20
815.881	20.5066	101.645	0.895833			698.122	12.5587	108.861	0.467391		926.469	10.2709	98.8913	0.387387			627.301	10.6239	96.0359	0.344			2043	18	97.9931	0.672727		2030	8	99.8522	0.741379		2080	7	99.9519	0.728814		524	6	99.4307	0.741379		2046	11	99.7556	0.711864		2055	36
825.978	11.1528	99.3195	0.916667			700.197	11.0054	92.7328	0.478261		943.645	14.6207	92.2797	0.396396			628.098	9.1129	96.0674	0.352			2045	25	94.132	0.690909		2073	8	91.7993	0.758621		2082	8	98.8473	0.745763		547	5	100	0.758621		2054	7	99.9513	0.728814		2068	20
976.08	56.6286	102.678	0.9375			702.796	9.29645	103.446	0.48913		945.067	15.8397	94.1643	0.405405			629.975	9.6184	96.2265	0.36			2059	19	99.2229	0.709091		2083	8	98.0797	0.775862		2084	16	100	0.762712		547	5	100	0.775862		2057	9	99.9514	0.745763		2075	19
1186.59	75.4583	100.717	0.958333			715.003	10.6961	105.883	0.5		954.94	30.5221	107.277	0.414414			630.424	10.9925	96.2266	0.368			2079	18	92.6888	0.727273		2088	13	99.8084	0.793103		2084	9	100.048	0.779661		549	5	96.6549	0.793103		2067	11	99.4194	0.762712		2109	24
2400.47	7.36884	100.221	0.979167			753.537	12.4857	105.339	0.51087		975.589	7.53955	94.6637	0.423423			634.129	14.1792	96.3558	0.376			2088	18	97.4138	0.745455		2106	10	98.433	0.810345		2095	7	98.7589	0.79661		556	5	99.4633	0.810345		2085	21	95.8753	0.779661		2138	20
2500.34	13.4333	94.7106	1			761.605	10.9944	99.6303	0.521739		976.681	12.5501	109.559	0.432432			644.052	8.48436	96.4077	0.384			2090	20	93.8756	0.763636		2108	21	100.949	0.827586		2120	7	99.9528	0.813559		565	8	94.6399	0.827586		2124	8	99.9529	0.79661		2149	20
						765.098	8.5018	108.454	0.532609		1031.85	28.136	97.9186	0.441441			646.986	16.3576	96.8748	0.392			2095	18	94.9403	0.781818		2127	11	99.6709	0.844828		2124	18	100	0.830508		594	5	96.9005	0.844828		2142	18	100	0.813559		2152	34
						825.772	17.0161	105.747	0.543478		1208.2	19.5649	101.652	0.45045			652.767	11.5907	96.898	0.4			2103	20	100.238	0.8		2141	8	99.8132	0.862069		2155	8	99.8608	0.847458		620	6	97.3312	0.862069		2158	12	99.9073	0.830508		2163	17
						872.875	14.3282	90.9383	0.554348		1784.21	19.9231	102.592	0.459459			652.897	10.4875	97.3449	0.408			2106	19	103.704	0.818182		2598	9	99.923	0.87931		2158	9	99.9537	0.864407		642	6	99.8445	0.87931		2437	8	91.7932	0.847458		2178	21
						928.259	13.7174	97.9599	0.565217		1788.57	25.3332	91.3655	0.468468			653.686	15.9913	97.6874	0.416			2285	18	93.3042	0.836364		2638	8	99.0523	0.896552		2263	8	99.6023	0.881356		1732	17	99.8845	0.896552		2621	10	99.9618	0.864407		2202	19
						1205	39.8702	108.51	0.576087		1800.78	43.659	104.595	0.477477			657.123	8.68648	97.7488	0.424			2492	17	90.8507	0.854545		2639	9	99.0906	0.913793		2538	8	99.9606	0.898305		2029	15	100	0.913793		2683	10	98.77	0.881356		2207	25
						1513.2	19.6277	106.278	0.586957		1871.54	29.7967	109.916	0.486486			657.868	10.2284	97.792	0.432			2563	16	91.6894	0.872727		2646	27	98.6772	0.931034		2649	13	99.7735	0.915254		2157	9	99.9536	0.931034		2684	8	99.9627	0.898305		2574	38
						1716.91	29.4376	95.1154	0.597826		1874.38	26.804	102.621	0.495495			666.027	19.9769	97.8441	0.44			2579	17	94.6491	0.890909		2671	10	99.6256	0.948276		2664	7	99.9249	0.932203		2175	10	99.954	0.948276		2743	15	95.9898	0.915254		2686	17
						1827.43	31.3224	91.8977	0.608696		1878.27	23.9148	99.9339	0.504505			668.005	30.0488	98.2943	0.448			2584	17	94.5433	0.909091		2691	17	93.4968	0.965517		2703	7	96.1154	0.949153		2263	21	99.8232	0.965517		2776	16	99.6037	0.932203		2768	18
						1846.72	44.2527	103.781	0.619565		1883.05	27.3303	100.239	0.513514			669.493	44.3183	98.3161	0.456			2609	16	96.6654	0.927273		2811	7	99.9644	0.982759		3329	6	99.8798	0.966102		2463	19	92.7324	0.982759		2779	9	99.7481	0.949153		2813	22
						1859.41	21.2765	104.421	0.630435		1887.92	28.4978	95.5404	0.522523			669.652	10.9487	98.3707	0.464			2614	16	97.5899	0.945455		2831	23	100	1		3365	22	98.0981	0.983051		2687	8	99.9628	1		2791	8	99.9283	0.966102		2854	19
						1866.92	16.1134	95.7609	0.641304		1895.08	18.618	105.111	0.531532			671.618	9.07564	98.5038	0.472			2684	17	100.224	0.963636							3466	11	100.029	1							3366	10	99.8217	0.983051		3034	20
						1876.7	20.336	91.2885	0.652174		1897.59	26.1273	108.69	0.540541			672.637	22.462	98.5157	0.48			2746	16	94.6103	0.981818																	3486	8	95.4389	1		3086	18
						1889.58	17.1872	99.3349	0.663043		1900.62	11.4451	102.17	0.54955			674.278	10.7237	98.7554	0.488			2922	16	96.6461	1																						3164	17
						1892.07	29.4302	98.8433	0.673913		1902.2	10.5503	99.9538	0.558559			675.241	27.0754	98.8786	0.496			530	9	111.579																							3394	22
						1893.36	27.2898	101.558	0.684783		1904.73	21.9421	91.9654	0.567568			677.777	7.65802	98.9174	0.504			525	14	113.147
						1907.2	22.6107	98.509	0.695652		1905.58	37.4206	108.131	0.576577			682.659	14.2851	98.9646	0.512			330	10	114.583
						1908.12	16.3163	93.3552	0.706522		1910.55	38.7988	98.6156	0.585586			686.16	10.0136	99.0469	0.52			570	12	116.09
						1916.47	29.0745	91.0742	0.717391		1913.22	15.5956	94.1999	0.594595			688.176	6.74121	99.251	0.528			334	11	119.286
						1916.97	11.7365	92.9425	0.728261		1929.57	23.5042	95.8577	0.603604			702.977	5.97706	99.6481	0.536			354	12	123.776
						1917.8	23.9567	104.506	0.73913		1930.11	12.1253	100.914	0.612613			714.091	7.22658	99.6827	0.544			480	11	124.352
						1919.26	15.6929	98.9675	0.75		1930.17	30.7574	103.853	0.621622			715.588	11.4572	99.7653	0.552
						1921.55	24.1236	103.507	0.76087		1936.01	22.6529	101.438	0.630631			756.471	16.7845	99.8029	0.56
						1937.58	12.004	98.0202	0.771739		1936.37	15.902	95.0034	0.63964			759.102	4.94722	100.085	0.568
						1940.58	47.2247	104.153	0.782609		1939.01	9.83147	96.2808	0.648649			760.941	7.62572	100.285	0.576
						1942.05	24.6318	107.626	0.793478		1956.21	28.6412	103.847	0.657658			762.767	11.5823	100.334	0.584
						1946.38	61.2203	97.2907	0.804348		1967.05	15.4592	97.9737	0.666667			765.168	9.51988	100.474	0.592
						1949.92	84.1529	103.034	0.815217		1976.25	37.8556	109.894	0.675676			782.042	39.671	100.515	0.6
						1983.94	14.2033	101.82	0.826087		1995.38	49.918	105.686	0.684685			790.888	33.1388	100.584	0.608
						2009.95	13.5648	103.458	0.836957		1997.15	30.4021	97.4651	0.693694			822.096	16.4613	100.609	0.616
						2039.74	11.5988	98.2408	0.847826		2000.67	25.1274	102.178	0.702703			825.526	8.28772	100.778	0.624
						2041.81	7.52436	94.0915	0.858696		2004.04	27.922	97.2098	0.711712			874.579	12.0065	101.026	0.632
						2045.63	16.7115	99.113	0.869565		2011.62	36.1786	99.7303	0.720721			889.466	70.5332	101.062	0.64
						2078.87	13.2666	104.521	0.880435		2012.81	22.3933	98.6548	0.72973			919.166	7.51301	101.134	0.648
						2103.51	22.9842	105.199	0.891304		2036.3	16.0205	95.9692	0.738739			957.502	146.894	101.156	0.656
						2118.77	12.6376	102.532	0.902174		2037.66	42.6237	103.26	0.747748			989.749	13.6921	101.186	0.664
						2151.07	22.4109	102.248	0.913043		2055.05	21.9099	103.988	0.756757			994.579	15.8455	101.317	0.672
						2174.57	26.5446	91.7178	0.923913		2075.78	22.9601	104.83	0.765766			1097.1	15.9409	101.498	0.68
						2414.15	10.5965	99.8933	0.934783		2077.67	18.833	94.2126	0.774775			1204.84	16.441	101.618	0.688
						2626.45	18.0726	99.2925	0.945652		2078.02	33.8766	97.5705	0.783784			1667.55	42.157	101.712	0.696
						2781.46	9.42486	93.6959	0.956522		2082.86	20.8217	102.087	0.792793			1793.93	7.57284	101.849	0.704
						2804.25	5.45307	90.041	0.967391		2083.93	9.86722	100.91	0.801802			1850.83	57.2904	101.869	0.712
						2826.02	9.64789	107.116	0.978261		2091.88	17.942	107.378	0.810811			1853.26	6.94583	102.157	0.72
						2831.15	5.74935	101.591	0.98913		2105.81	29.0312	104.072	0.81982			1855.39	8.35182	102.311	0.728
						3248.49	9.04959	94.1337	1		2110.05	29.3909	97.2878	0.828829			1863.99	21.9076	102.447	0.736
											2119.23	51.4323	107.217	0.837838			1892.97	9.65386	102.492	0.744
											2153.67	10.0583	101.529	0.846847			1894.61	26.9444	102.517	0.752
											2171.75	19.501	107.882	0.855856			1919.63	9.15165	102.604	0.76
											2189.36	36.6241	106.385	0.864865			1928.6	25.1694	103.001	0.768
											2259.83	57.0214	99.0856	0.873874			1930.18	6.46672	103.117	0.776
											2426.73	17.8796	97.8563	0.882883			1941.98	5.07297	103.373	0.784
											2539.41	20.5948	103.121	0.891892			1962.05	8.49021	103.56	0.792
											2563.9	11.8778	109.878	0.900901			1978.17	6.43684	103.584	0.8
											2574.99	19.8297	103.7	0.90991			1978.51	14.0359	103.886	0.808
											2582.05	13.2116	94.0046	0.918919			2007.64	9.9014	103.913	0.816
											2666.76	33.5666	92.1339	0.927928			2018.56	9.77999	104.131	0.824
											2682.85	11.4669	101.742	0.936937			2022.4	34.5291	104.194	0.832
											2684.01	22.7884	90.2023	0.945946			2026.42	26.5291	104.991	0.84
											2684.38	15.2822	99.5925	0.954955			2055.96	13.358	105.059	0.848
											2713.73	13.7619	93.2925	0.963964			2058.85	7.93581	105.144	0.856
											2721.91	11.1883	98.4051	0.972973			2069.16	43.6177	105.283	0.864
											2805.23	46.4755	93.2982	0.981982			2079.84	32.8813	105.309	0.872
											2805.62	17.3333	92.1217	0.990991			2080.1	8.95265	105.552	0.88
											3082.03	6.20825	103.366	1			2101.7	9.19173	105.818	0.888
																	2144.88	17.4239	105.889	0.896
																	2201.37	15.248	105.945	0.904
																	2422.66	7.42184	106.056	0.912
																	2481.68	8.21946	106.398	0.92
																	2508.64	9.54365	106.425	0.928
																	2531.96	9.26582	106.536	0.936
																	2591.54	11.7381	106.606	0.944
																	2666.96	22.8279	106.625	0.952
																	2774.27	9.7222	107.512	0.96
																	2776.54	7.20385	107.803	0.968
																	2807.34	40.8249	107.99	0.976
																	2859.93	17.525	108.524	0.984
																	3014.82	54.0005	108.861	0.992
																	3106.63	10.1593	109.769	1
[truncated: 26 more columns]

## Sheet: Circular Plots
	Max	Min	CR-ZR-01	MEI-ZR-01	GIM-ZR-01	PICON-2	P-381 (ALL)	P-385 (all)	MIR-41	AD-PO-49	AD-PO-57	AD-PO-66	AD-PO-55	EC-PO-419	AD-PO-48B	EC-PO-293	EC-PO-337		SO-1; SO-2	SO-4	SO-5	SO-6	SO-7	SO-8	SO-9	SO-10	SO-11	SO-12	SO-13	SO-14		SALD1	VC45	VC57	VC21
Archean	4000	2500	0	0	11	7	0	1	4	6	10	13	6	0	7	6	0		8	8	7	1	9	9	9	3	0	6	14	4		10	6	12	1
Paleoproterozoic	2499	1600	1	3	21	17	3	2	28	34	16	25	16	0	8	33	0		16	9	19	6	27	24	18	9	3	19	17	11		29	32	48	1
Mesoproterozoic	1599	1000	3	0	3	7	0	0	3	12	5	8	3	0	4	11	3		0	3	4	0	0	0	1	5	2	2	2	2		2	2	2	1
Neoproterozoic	999	542	30	25	22	21	12	14	42	58	74	37	58	4	40	31	12		10	22	22	8	23	21	19	28	10	14	12	9		81	49	47	19
Paleozoic	541	251	59	49	20	21	73	83	6	2	11	26	9	41	2	16	57		21	16	7	43	0	0	11	9	0	14	9	14		3	2	1	26
		TOTAL	93	77	77	73	88	100	83	112	116	109	92	45	61	97	72		55	58	59	58	59	54	58	54	15	55	54	40		125	91	110	48
							3
							Martínez Catalán et al., 2004, 2008, 2016									Dias da Silva et al., 2015
