# Supplementary material for: A tectonic carpet of Variscan flysch at the base of a rootless accretionary prism in northwestern Iberia: U–Pb zircon age constrains from sediments and volcanic olistoliths
Source: Copernicus journal article supplement (doi:10.5194/se-12-835-2021), 2021-04-15
Supplement: Supplementary file 5 [file Supplementary Table 14_EC-PO-337.xls]

## Sheet: PlotDat3
Source sheet	all data	0.537998	0.0698302	0	0	0.217708	0.0315113	0.604688	0.077423	0.618365	0.0781956	0.664998	0.0778973	0.647136	0.0821122	0.65252	0.0833919	0.671724	0.0832256	0.658559	0.0835716	0.676506	0.0839744	0.669715	0.0842652	0.674523	0.0844512	0.672314	0.0840981	0.677682	0.0847799	0.679457	0.0851974	0.69249	0.0850604	0.674995	0.0851757	0.69525	0.0851793	0.688862	0.0862278	0.694015	0.0870985	0.705411	0.0858133	0.678683	0.0865478	0.689149	0.0869942
Plot name	Concordia0	0.549994	0.0709535	0.0605465	0.0093022	0.482812	0.0640155	0.601896	0.0779101	0.615496	0.0788483	0.662393	0.0792992	0.644067	0.0827859	0.649562	0.0837974	0.668613	0.0839674	0.655458	0.0843001	0.673382	0.0845977	0.666746	0.0846987	0.671132	0.0852783	0.669039	0.0849816	0.674389	0.0856481	0.676198	0.0859804	0.689128	0.0859359	0.67187	0.0859133	0.691705	0.0862522	0.685848	0.0866094	0.690726	0.0875743	0.701912	0.0868395	0.675612	0.0871726	0.685979	0.0875859
Plot Type	1	0.549446	0.071827	0.124759	0.0186909	0.805631	0.097544	0.593928	0.0777427	0.607319	0.0788615	0.654851	0.0803745	0.63532	0.0827681	0.6411	0.0834973	0.659747	0.0840386	0.646626	0.084339	0.664465	0.0845236	0.658256	0.0844383	0.661471	0.0853676	0.659712	0.0851733	0.665012	0.0858162	0.666914	0.0860517	0.679546	0.0861094	0.662968	0.0859615	0.681603	0.0866282	0.677217	0.0862839	0.681319	0.0872823	0.691936	0.0871749	0.666857	0.087094	0.676932	0.0874506
1st free col	153	0.573993	0.07425	0.192859	0.028167	1.19873	0.132129	0.581428	0.0769342	0.594499	0.078234	0.642702	0.0810762	0.621606	0.0820602	0.627821	0.082516	0.645843	0.0834333	0.632777	0.0836851	0.650479	0.0837578	0.644932	0.0835051	0.646324	0.084712	0.645091	0.084658	0.650311	0.0852703	0.652356	0.0854054	0.664522	0.0855669	0.649011	0.0853163	0.665763	0.086277	0.663667	0.0852776	0.666554	0.086246	0.676291	0.0867923	0.653128	0.0863184	0.66274	0.0865993
Sigma Level	2	0.581634	0.0750883	0.265083	0.0377312	1.67741	0.167804	0.56541	0.0755502	0.578073	0.0770166	0.626478	0.0813737	0.604034	0.0807195	0.610801	0.0809329	0.628028	0.0822006	0.615035	0.0823914	0.632556	0.0823625	0.627853	0.0819746	0.626918	0.0833644	0.626358	0.0834772	0.631476	0.0840548	0.633704	0.0840939	0.645271	0.0843522	0.631129	0.08403	0.645467	0.085227	0.646296	0.083672	0.647628	0.0845494	0.656246	0.0857227	0.635537	0.0849085	0.644554	0.085101
Absolute Errs	FALSE	0.597564	0.0756889	0.341679	0.0473844	2.2603	0.204603	0.547171	0.0737028	0.559372	0.0753081	0.606887	0.0812539	0.584028	0.0788548	0.591417	0.0788763	0.607745	0.0804404	0.594836	0.0805627	0.612148	0.0804506	0.608404	0.079971	0.604824	0.0814342	0.605032	0.0817267	0.610033	0.0822682	0.612469	0.0822234	0.623353	0.0825639	0.61077	0.0822068	0.622359	0.0835633	0.626512	0.0815973	0.626075	0.08233	0.633424	0.0840527	0.615509	0.0829786	0.623847	0.0830771
Symbol Type	1	0.584713	0.0757876	0.422913	0.0571274	2.97009	0.242562	0.528189	0.0715417	0.539911	0.0732468	0.584785	0.0807222	0.563209	0.0766169	0.571241	0.0765129	0.586637	0.0782953	0.573817	0.0783471	0.590908	0.0781772	0.588159	0.0776565	0.581832	0.0790776	0.582841	0.0795482	0.587721	0.0800551	0.590372	0.0799456	0.600544	0.0803468	0.589585	0.0799943	0.598313	0.0814206	0.605917	0.0792215	0.603641	0.0797675	0.609674	0.0819176	0.594666	0.080685	0.602296	0.0806915
Inverse Plot	FALSE	0.601884	0.075987	0.509066	0.066961	3.83441	0.281716	0.510002	0.0692419	0.521268	0.0709997	0.561139	0.0798017	0.543264	0.0741874	0.551907	0.074034	0.566414	0.0759389	0.553681	0.0759242	0.570558	0.0757263	0.568759	0.0752185	0.559806	0.0764856	0.561582	0.0771183	0.566345	0.0775948	0.569202	0.0774449	0.578692	0.0778805	0.569289	0.0775719	0.575276	0.0789725	0.58618	0.076737	0.582143	0.0770697	0.58692	0.0794905	0.574698	0.0782136	0.581648	0.0781376
Color Plot	TRUE	0.598588	0.0761335	0.600434	0.0768861	IsoLine	IsoLine	0.494083	0.0669898	0.504951	0.0687489	0.536982	0.0785327	0.525808	0.0717629	0.534981	0.0716405	0.548715	0.0735624	0.536059	0.0734902	0.552746	0.0732966	0.551775	0.0728547	0.54053	0.0738682	0.542978	0.0746338	0.547638	0.0750868	0.550674	0.0749239	0.559568	0.0753648	0.551527	0.0751357	0.555114	0.0764175	0.5689	0.0743452	0.563322	0.0744549	0.567005	0.0769679	0.557221	0.0757645	0.563574	0.0756221
3D plot	FALSE	0.593747	0.0761717	0.697335	0.0869035			0.481721	0.0649678	0.492284	0.0666767	0.51337	0.0769705	0.512256	0.0695399	0.521835	0.0695264	0.534973	0.0713581	0.522379	0.0712424	0.538914	0.0710848	0.538584	0.0707566	0.525564	0.0714374	0.528535	0.072296	0.533116	0.0727341	0.536291	0.0725869	0.54472	0.0730036	0.537737	0.0728832	0.539461	0.0739623	0.555477	0.0722398	0.548704	0.0721351	0.551543	0.0745541	0.543652	0.0735363	0.54954	0.073349
Linear	FALSE	0.594348	0.0764445	0.800103	0.0970141			0.473919	0.0633398	0.484292	0.0649509	0.491335	0.0751836	0.503706	0.0676985	0.513533	0.0678628	0.526302	0.0695046	0.513749	0.0693628	0.530184	0.0692701	0.530254	0.069094	0.516123	0.0693901	0.519424	0.0702942	0.523955	0.0707273	0.527216	0.0706231	0.535351	0.070988	0.529037	0.0709968	0.529584	0.0718061	0.546998	0.0705914	0.539473	0.0702982	0.541787	0.0724449	0.535089	0.0717093	0.540683	0.0715023
Data Range	AC3:AG74	0.599289	0.0770045	0.909093	0.107219			0.471308	0.0622375	0.481622	0.0637115	0.471839	0.07325	0.50085	0.0663878	0.510749	0.0667846	0.523405	0.0681522	0.510867	0.0680036	0.527263	0.0679996	0.52746	0.0680017	0.51297	0.0678923	0.516383	0.0687908	0.520897	0.0692291	0.524185	0.0691917	0.532221	0.0694815	0.526132	0.0696294	0.526285	0.0701234	0.54415	0.0695335	0.536376	0.069093	0.538527	0.0708109	0.532228	0.0704316	0.537719	0.0702316
Filled Symbols	FALSE	0.601821	0.0771946	1.02468	0.117518			0.4741	0.0617504	0.484492	0.0630588	0.455735	0.0712542	0.503919	0.0657141	0.513707	0.0663791	0.526515	0.0674104	0.513969	0.0672751	0.530387	0.0673762	0.530429	0.0675682	0.516361	0.0670652	0.519658	0.0679074	0.52419	0.0683608	0.527444	0.0684087	0.535583	0.068606	0.529257	0.0688917	0.52983	0.0690505	0.547164	0.0691519	0.539665	0.0686172	0.542026	0.0697847	0.535299	0.0698068	0.540889	0.06964
ConcAge	FALSE	0.612355	0.077271	1.14727	0.127914			0.482069	0.0619178	0.492668	0.0630456	0.443727	0.0692835	0.512666	0.0657319	0.522168	0.0666792	0.535382	0.0673392	0.522801	0.0672362	0.539303	0.0674504	0.538919	0.0678286	0.526022	0.0669758	0.528984	0.0677156	0.533567	0.0681928	0.536729	0.0683375	0.545164	0.0684325	0.538159	0.0688435	0.539932	0.0686745	0.555796	0.0694774	0.549073	0.0689092	0.552002	0.0694493	0.544053	0.0698854	0.549936	0.0697753
ConcSwap	FALSE	0.600564	0.0774025	1.27728	0.138406			0.494568	0.0627263	0.505489	0.0636731	0.436339	0.0674239	0.526381	0.0664399	0.535447	0.0676606	0.549286	0.0679445	0.53665	0.0678902	0.553289	0.0682162	0.552243	0.0687618	0.541169	0.0676315	0.543606	0.0682309	0.548268	0.0687386	0.551287	0.0689838	0.560189	0.0689751	0.552116	0.0694887	0.555773	0.0690257	0.569346	0.0704837	0.563837	0.0699455	0.567647	0.0698319	0.557782	0.0706611	0.564127	0.0706266
1st Symbol-row	1	0.610768	0.0776514	1.41516	0.148995			0.510586	0.0641103	0.521915	0.0648904	0.433895	0.0657567	0.543953	0.0677805	0.552468	0.0692436	0.567101	0.0691772	0.554392	0.0691839	0.571213	0.0696115	0.569322	0.0702923	0.560576	0.068979	0.562339	0.0694117	0.567103	0.0699541	0.569939	0.0702953	0.57944	0.0701897	0.569999	0.0707751	0.576069	0.0700757	0.586717	0.0720893	0.582763	0.0716421	0.587692	0.0709015	0.575374	0.0720709	0.582313	0.0721248
		0.616506	0.0778807	1.56139	0.159684			0.528825	0.0659576	0.540616	0.0665989	0.4365	0.0643548	0.563958	0.0696453	0.571851	0.0713002	0.587384	0.0709374	0.574591	0.0710126	0.591621	0.0715234	0.588772	0.0722959	0.58267	0.0709093	0.583664	0.0711623	0.588545	0.0717408	0.591173	0.0721657	0.601358	0.071978	0.590357	0.0725983	0.599176	0.0717394	0.606501	0.074164	0.604316	0.0738615	0.610514	0.0725715	0.595402	0.0740008	0.603021	0.0741487
		0.615196	0.0780958	1.71647	0.170471			0.547807	0.0681187	0.560076	0.0686602	0.444042	0.0632795	0.584777	0.0718831	0.592028	0.0736637	0.608492	0.0730826	0.595609	0.0732281	0.61286	0.0737968	0.609016	0.0746104	0.605661	0.0732658	0.605856	0.0733407	0.610858	0.0739539	0.613271	0.0744435	0.624166	0.0741951	0.611543	0.0748108	0.623222	0.0738821	0.627095	0.0765398	0.62675	0.076424	0.634264	0.0747065	0.616244	0.0762944	0.624571	0.0765343
		0.621969	0.0783121	1.88095	0.181359			0.565994	0.0704185	0.57872	0.0709073	0.456191	0.0625778	0.604722	0.0743127	0.611362	0.0761425	0.628715	0.0754389	0.615745	0.075651	0.63321	0.0762477	0.628417	0.0770484	0.627687	0.0758578	0.627115	0.0757706	0.632234	0.0764141	0.634441	0.0769443	0.646018	0.0766614	0.631838	0.0772332	0.646259	0.0763302	0.646832	0.0790243	0.648248	0.0791218	0.657018	0.0771337	0.636213	0.0787658	0.64522	0.0790883
		0.605455	0.0784897	2.05538	0.192348			0.581914	0.0726706	0.595037	0.0731582	0.472415	0.0622803	0.622178	0.0767372	0.628288	0.078536	0.646414	0.0778155	0.633367	0.078085	0.651023	0.0786774	0.6454	0.0794122	0.646964	0.0784753	0.645719	0.0782551	0.65094	0.0789222	0.652968	0.0794652	0.665143	0.0791771	0.649601	0.0796693	0.666421	0.0788852	0.664112	0.0814161	0.667069	0.0817366	0.676933	0.0796563	0.65369	0.0812149	0.663293	0.0816037
		0.613434	0.0786129	2.24037	0.20344			0.594275	0.0746926	0.607704	0.0752304	0.492006	0.0624001	0.63573	0.0789602	0.641434	0.0806502	0.660156	0.0800197	0.647048	0.0803329	0.664854	0.0808892	0.658591	0.0815104	0.661929	0.0809061	0.660162	0.0805929	0.665462	0.0812749	0.667352	0.0818023	0.679991	0.0815384	0.66339	0.0819219	0.682074	0.0813404	0.677535	0.0835215	0.681687	0.0840564	0.692395	0.08207	0.667259	0.0834431	0.677327	0.0838769
		0.62173	0.0788985	2.43656	0.214635			0.602077	0.0763207	0.615696	0.0769561	0.514108	0.0629318	0.64428	0.0808016	0.649735	0.0823137	0.668826	0.0818732	0.655678	0.0822125	0.673584	0.0827039	0.666921	0.0831729	0.67137	0.0829533	0.669273	0.0825947	0.674624	0.0832816	0.676427	0.083766	0.689359	0.0835539	0.67209	0.0838082	0.691951	0.0834966	0.686014	0.0851699	0.690918	0.0858933	0.702151	0.0841793	0.675821	0.0852701	0.686185	0.0857236
		0.629038	0.0789069	2.64464	0.225933			0.604688	0.077423	0.618365	0.0781956	0.537754	0.0638523	0.647136	0.0821122	0.65252	0.0833919	0.671724	0.0832256	0.658559	0.0835716	0.676506	0.0839744	0.669715	0.0842652	0.674523	0.0844512	0.672314	0.0840981	0.677682	0.0847799	0.679457	0.0851974	0.69249	0.0850604	0.674995	0.0851757	0.69525	0.0851793	0.688862	0.0862278	0.694015	0.0870985	0.705411	0.0858133	0.678683	0.0865478	0.689149	0.0869942
		0.62444	0.0789767	2.86531	0.237337							0.561911	0.0651214
		0.624335	0.0790456	3.09934	0.248847							0.585523	0.0666835
		0.627411	0.0791683	3.34754	0.260464							0.607558	0.0684704
		0.628128	0.0792573	3.61077	0.272189							0.627054	0.070404
		0.630927	0.0793034	3.88993	0.284024							0.643158	0.0723998
		0.619379	0.0794181	4.186	0.295968							0.655166	0.0743705
		0.6298	0.0797491	4.49999	0.308023							0.662554	0.0762301
		0.636613	0.0799789	4.5	0.308023							0.664998	0.0778973
		0.642869	0.0800923	IsoLine	IsoLine
		0.63092	0.0801246
		0.641899	0.0802
		0.638808	0.0802264
		0.633488	0.0804087
		0.646357	0.0812499
		0.657497	0.0814521
		0.642697	0.0818423
		0.642191	0.0820823
		0.66612	0.0821662
		0.642704	0.0823729
		0.662146	0.0824366
		0.655795	0.0827737
		0.674735	0.0830796
		0.674906	0.0831158
		0.669242	0.0831375
		0.677241	0.0832561
		0.681828	0.0836458
		0.666497	0.0838171
		0.671927	0.083845
		0.667226	0.0839261
		0.669722	0.0842577
		0.67	0.0853809
		0.703161	0.0857444
		0.673458	0.085958
		0.716047	0.0870103
		0.69104	0.0877709
		0.692177	0.0877876
		0.722311	0.0893488
		0.724423	0.0897697
		0.741031	0.0908457
		0.766053	0.0932046
		0.764464	0.0948934
		0.858176	0.101177
		0.873019	0.10172
		0.971993	0.112033
		0.997389	0.116482
		1.30918	0.138416
		1.92055	0.176922
		2.78395	0.227068
		3.25896	0.254675
		IsoLine	IsoLine
[truncated: 102 more columns]

## Sheet: PlotDat0
Source sheet	all data	0.537998	0.0698302	0	0	0.217708	0.0315113	0.604688	0.077423	0.618365	0.0781956	0.664998	0.0778973	0.647136	0.0821122	0.65252	0.0833919	0.671724	0.0832256	0.658559	0.0835716	0.676506	0.0839744	0.669715	0.0842652	0.674523	0.0844512	0.672314	0.0840981	0.677682	0.0847799	0.679457	0.0851974	0.69249	0.0850604	0.674995	0.0851757	0.69525	0.0851793	0.688862	0.0862278	0.694015	0.0870985	0.705411	0.0858133	0.678683	0.0865478	0.689149	0.0869942
Plot name	Concordia0	0.549994	0.0709535	0.0558399	0.00859534	0.482812	0.0640155	0.601896	0.0779101	0.615496	0.0788483	0.662393	0.0792992	0.644067	0.0827859	0.649562	0.0837974	0.668613	0.0839674	0.655458	0.0843001	0.673382	0.0845977	0.666746	0.0846987	0.671132	0.0852783	0.669039	0.0849816	0.674389	0.0856481	0.676198	0.0859804	0.689128	0.0859359	0.67187	0.0859133	0.691705	0.0862522	0.685848	0.0866094	0.690726	0.0875743	0.701912	0.0868395	0.675612	0.0871726	0.685979	0.0875859
Plot Type	1	0.549446	0.071827	0.114798	0.0172646	0.805631	0.097544	0.593928	0.0777427	0.607319	0.0788615	0.654851	0.0803745	0.63532	0.0827681	0.6411	0.0834973	0.659747	0.0840386	0.646626	0.084339	0.664465	0.0845236	0.658256	0.0844383	0.661471	0.0853676	0.659712	0.0851733	0.665012	0.0858162	0.666914	0.0860517	0.679546	0.0861094	0.662968	0.0859615	0.681603	0.0866282	0.677217	0.0862839	0.681319	0.0872823	0.691936	0.0871749	0.666857	0.087094	0.676932	0.0874506
1st free col	153	0.573993	0.07425	0.177048	0.0260083	1.19873	0.132129	0.581428	0.0769342	0.594499	0.078234	0.642702	0.0810762	0.621606	0.0820602	0.627821	0.082516	0.645843	0.0834333	0.632777	0.0836851	0.650479	0.0837578	0.644932	0.0835051	0.646324	0.084712	0.645091	0.084658	0.650311	0.0852703	0.652356	0.0854054	0.664522	0.0855669	0.649011	0.0853163	0.665763	0.086277	0.663667	0.0852776	0.666554	0.086246	0.676291	0.0867923	0.653128	0.0863184	0.66274	0.0865993
Sigma Level	2	0.581634	0.0750883	0.242774	0.0348272	1.67741	0.167804	0.56541	0.0755502	0.578073	0.0770166	0.626478	0.0813737	0.604034	0.0807195	0.610801	0.0809329	0.628028	0.0822006	0.615035	0.0823914	0.632556	0.0823625	0.627853	0.0819746	0.626918	0.0833644	0.626358	0.0834772	0.631476	0.0840548	0.633704	0.0840939	0.645271	0.0843522	0.631129	0.08403	0.645467	0.085227	0.646296	0.083672	0.647628	0.0845494	0.656246	0.0857227	0.635537	0.0849085	0.644554	0.085101
Absolute Errs	FALSE	0.597564	0.0756889	0.31217	0.0437219	2.2603	0.204603	0.547171	0.0737028	0.559372	0.0753081	0.606887	0.0812539	0.584028	0.0788548	0.591417	0.0788763	0.607745	0.0804404	0.594836	0.0805627	0.612148	0.0804506	0.608404	0.079971	0.604824	0.0814342	0.605032	0.0817267	0.610033	0.0822682	0.612469	0.0822234	0.623353	0.0825639	0.61077	0.0822068	0.622359	0.0835633	0.626512	0.0815973	0.626075	0.08233	0.633424	0.0840527	0.615509	0.0829786	0.623847	0.0830771
Symbol Type	1	0.584713	0.0757876	0.385442	0.0526931	2.97009	0.242562	0.528189	0.0715417	0.539911	0.0732468	0.584785	0.0807222	0.563209	0.0766169	0.571241	0.0765129	0.586637	0.0782953	0.573817	0.0783471	0.590908	0.0781772	0.588159	0.0776565	0.581832	0.0790776	0.582841	0.0795482	0.587721	0.0800551	0.590372	0.0799456	0.600544	0.0803468	0.589585	0.0799943	0.598313	0.0814206	0.605917	0.0792215	0.603641	0.0797675	0.609674	0.0819176	0.594666	0.080685	0.602296	0.0806915
Inverse Plot	FALSE	0.601884	0.075987	0.462805	0.0617413	3.83441	0.281716	0.510002	0.0692419	0.521268	0.0709997	0.561139	0.0798017	0.543264	0.0741874	0.551907	0.074034	0.566414	0.0759389	0.553681	0.0759242	0.570558	0.0757263	0.568759	0.0752185	0.559806	0.0764856	0.561582	0.0771183	0.566345	0.0775948	0.569202	0.0774449	0.578692	0.0778805	0.569289	0.0775719	0.575276	0.0789725	0.58618	0.076737	0.582143	0.0770697	0.58692	0.0794905	0.574698	0.0782136	0.581648	0.0781376
Color Plot	TRUE	0.598588	0.0761335	0.544488	0.0708673	IsoLine	IsoLine	0.494083	0.0669898	0.504951	0.0687489	0.536982	0.0785327	0.525808	0.0717629	0.534981	0.0716405	0.548715	0.0735624	0.536059	0.0734902	0.552746	0.0732966	0.551775	0.0728547	0.54053	0.0738682	0.542978	0.0746338	0.547638	0.0750868	0.550674	0.0749239	0.559568	0.0753648	0.551527	0.0751357	0.555114	0.0764175	0.5689	0.0743452	0.563322	0.0744549	0.567005	0.0769679	0.557221	0.0757645	0.563574	0.0756221
3D plot	FALSE	0.593747	0.0761717	0.630731	0.0800718			0.481721	0.0649678	0.492284	0.0666767	0.51337	0.0769705	0.512256	0.0695399	0.521835	0.0695264	0.534973	0.0713581	0.522379	0.0712424	0.538914	0.0710848	0.538584	0.0707566	0.525564	0.0714374	0.528535	0.072296	0.533116	0.0727341	0.536291	0.0725869	0.54472	0.0730036	0.537737	0.0728832	0.539461	0.0739623	0.555477	0.0722398	0.548704	0.0721351	0.551543	0.0745541	0.543652	0.0735363	0.54954	0.073349
Linear	FALSE	0.594348	0.0764445	0.721791	0.0893554			0.473919	0.0633398	0.484292	0.0649509	0.491335	0.0751836	0.503706	0.0676985	0.513533	0.0678628	0.526302	0.0695046	0.513749	0.0693628	0.530184	0.0692701	0.530254	0.069094	0.516123	0.0693901	0.519424	0.0702942	0.523955	0.0707273	0.527216	0.0706231	0.535351	0.070988	0.529037	0.0709968	0.529584	0.0718061	0.546998	0.0705914	0.539473	0.0702982	0.541787	0.0724449	0.535089	0.0717093	0.540683	0.0715023
Data Range	AC3:AG74	0.599289	0.0770045	0.817936	0.0987188			0.471308	0.0622375	0.481622	0.0637115	0.471839	0.07325	0.50085	0.0663878	0.510749	0.0667846	0.523405	0.0681522	0.510867	0.0680036	0.527263	0.0679996	0.52746	0.0680017	0.51297	0.0678923	0.516383	0.0687908	0.520897	0.0692291	0.524185	0.0691917	0.532221	0.0694815	0.526132	0.0696294	0.526285	0.0701234	0.54415	0.0695335	0.536376	0.069093	0.538527	0.0708109	0.532228	0.0704316	0.537719	0.0702316
Filled Symbols	FALSE	0.601821	0.0771946	0.919449	0.108163			0.4741	0.0617504	0.484492	0.0630588	0.455735	0.0712542	0.503919	0.0657141	0.513707	0.0663791	0.526515	0.0674104	0.513969	0.0672751	0.530387	0.0673762	0.530429	0.0675682	0.516361	0.0670652	0.519658	0.0679074	0.52419	0.0683608	0.527444	0.0684087	0.535583	0.068606	0.529257	0.0688917	0.52983	0.0690505	0.547164	0.0691519	0.539665	0.0686172	0.542026	0.0697847	0.535299	0.0698068	0.540889	0.06964
ConcAge	FALSE	0.612355	0.077271	1.02663	0.117688			0.482069	0.0619178	0.492668	0.0630456	0.443727	0.0692835	0.512666	0.0657319	0.522168	0.0666792	0.535382	0.0673392	0.522801	0.0672362	0.539303	0.0674504	0.538919	0.0678286	0.526022	0.0669758	0.528984	0.0677156	0.533567	0.0681928	0.536729	0.0683375	0.545164	0.0684325	0.538159	0.0688435	0.539932	0.0686745	0.555796	0.0694774	0.549073	0.0689092	0.552002	0.0694493	0.544053	0.0698854	0.549936	0.0697753
ConcSwap	FALSE	0.600564	0.0774025	1.1398	0.127295			0.494568	0.0627263	0.505489	0.0636731	0.436339	0.0674239	0.526381	0.0664399	0.535447	0.0676606	0.549286	0.0679445	0.53665	0.0678902	0.553289	0.0682162	0.552243	0.0687618	0.541169	0.0676315	0.543606	0.0682309	0.548268	0.0687386	0.551287	0.0689838	0.560189	0.0689751	0.552116	0.0694887	0.555773	0.0690257	0.569346	0.0704837	0.563837	0.0699455	0.567647	0.0698319	0.557782	0.0706611	0.564127	0.0706266
1st Symbol-row	1	0.610768	0.0776514	1.25928	0.136984			0.510586	0.0641103	0.521915	0.0648904	0.433895	0.0657567	0.543953	0.0677805	0.552468	0.0692436	0.567101	0.0691772	0.554392	0.0691839	0.571213	0.0696115	0.569322	0.0702923	0.560576	0.068979	0.562339	0.0694117	0.567103	0.0699541	0.569939	0.0702953	0.57944	0.0701897	0.569999	0.0707751	0.576069	0.0700757	0.586717	0.0720893	0.582763	0.0716421	0.587692	0.0709015	0.575374	0.0720709	0.582313	0.0721248
		0.616506	0.0778807	1.38544	0.146757			0.528825	0.0659576	0.540616	0.0665989	0.4365	0.0643548	0.563958	0.0696453	0.571851	0.0713002	0.587384	0.0709374	0.574591	0.0710126	0.591621	0.0715234	0.588772	0.0722959	0.58267	0.0709093	0.583664	0.0711623	0.588545	0.0717408	0.591173	0.0721657	0.601358	0.071978	0.590357	0.0725983	0.599176	0.0717394	0.606501	0.074164	0.604316	0.0738615	0.610514	0.0725715	0.595402	0.0740008	0.603021	0.0741487
		0.615196	0.0780958	1.51864	0.156614			0.547807	0.0681187	0.560076	0.0686602	0.444042	0.0632795	0.584777	0.0718831	0.592028	0.0736637	0.608492	0.0730826	0.595609	0.0732281	0.61286	0.0737968	0.609016	0.0746104	0.605661	0.0732658	0.605856	0.0733407	0.610858	0.0739539	0.613271	0.0744435	0.624166	0.0741951	0.611543	0.0748108	0.623222	0.0738821	0.627095	0.0765398	0.62675	0.076424	0.634264	0.0747065	0.616244	0.0762944	0.624571	0.0765343
		0.621969	0.0783121	1.65929	0.166555			0.565994	0.0704185	0.57872	0.0709073	0.456191	0.0625778	0.604722	0.0743127	0.611362	0.0761425	0.628715	0.0754389	0.615745	0.075651	0.63321	0.0762477	0.628417	0.0770484	0.627687	0.0758578	0.627115	0.0757706	0.632234	0.0764141	0.634441	0.0769443	0.646018	0.0766614	0.631838	0.0772332	0.646259	0.0763302	0.646832	0.0790243	0.648248	0.0791218	0.657018	0.0771337	0.636213	0.0787658	0.64522	0.0790883
		0.605455	0.0784897	1.80778	0.176582			0.581914	0.0726706	0.595037	0.0731582	0.472415	0.0622803	0.622178	0.0767372	0.628288	0.078536	0.646414	0.0778155	0.633367	0.078085	0.651023	0.0786774	0.6454	0.0794122	0.646964	0.0784753	0.645719	0.0782551	0.65094	0.0789222	0.652968	0.0794652	0.665143	0.0791771	0.649601	0.0796693	0.666421	0.0788852	0.664112	0.0814161	0.667069	0.0817366	0.676933	0.0796563	0.65369	0.0812149	0.663293	0.0816037
		0.613434	0.0786129	1.96457	0.186695			0.594275	0.0746926	0.607704	0.0752304	0.492006	0.0624001	0.63573	0.0789602	0.641434	0.0806502	0.660156	0.0800197	0.647048	0.0803329	0.664854	0.0808892	0.658591	0.0815104	0.661929	0.0809061	0.660162	0.0805929	0.665462	0.0812749	0.667352	0.0818023	0.679991	0.0815384	0.66339	0.0819219	0.682074	0.0813404	0.677535	0.0835215	0.681687	0.0840564	0.692395	0.08207	0.667259	0.0834431	0.677327	0.0838769
		0.62173	0.0788985	2.13011	0.196895			0.602077	0.0763207	0.615696	0.0769561	0.514108	0.0629318	0.64428	0.0808016	0.649735	0.0823137	0.668826	0.0818732	0.655678	0.0822125	0.673584	0.0827039	0.666921	0.0831729	0.67137	0.0829533	0.669273	0.0825947	0.674624	0.0832816	0.676427	0.083766	0.689359	0.0835539	0.67209	0.0838082	0.691951	0.0834966	0.686014	0.0851699	0.690918	0.0858933	0.702151	0.0841793	0.675821	0.0852701	0.686185	0.0857236
		0.629038	0.0789069	2.30489	0.207183			0.604688	0.077423	0.618365	0.0781956	0.537754	0.0638523	0.647136	0.0821122	0.65252	0.0833919	0.671724	0.0832256	0.658559	0.0835716	0.676506	0.0839744	0.669715	0.0842652	0.674523	0.0844512	0.672314	0.0840981	0.677682	0.0847799	0.679457	0.0851974	0.69249	0.0850604	0.674995	0.0851757	0.69525	0.0851793	0.688862	0.0862278	0.694015	0.0870985	0.705411	0.0858133	0.678683	0.0865478	0.689149	0.0869942
		0.62444	0.0789767	2.48944	0.217559							0.561911	0.0651214
		0.624335	0.0790456	2.68428	0.228024							0.585523	0.0666835
		0.627411	0.0791683	2.89001	0.23858							0.607558	0.0684704
		0.628128	0.0792573	3.10723	0.249226							0.627054	0.070404
		0.630927	0.0793034	3.33658	0.259963							0.643158	0.0723998
		0.619379	0.0794181	3.57873	0.270793							0.655166	0.0743705
		0.6298	0.0797491	3.83441	0.281716							0.662554	0.0762301
		0.636613	0.0799789	4	0.288474							0.664998	0.0778973
		0.642869	0.0800923	IsoLine	IsoLine
		0.63092	0.0801246
		0.641899	0.0802
		0.638808	0.0802264
		0.633488	0.0804087
		0.646357	0.0812499
		0.657497	0.0814521
		0.642697	0.0818423
		0.642191	0.0820823
		0.66612	0.0821662
		0.642704	0.0823729
		0.662146	0.0824366
		0.655795	0.0827737
		0.674735	0.0830796
		0.674906	0.0831158
		0.669242	0.0831375
		0.677241	0.0832561
		0.681828	0.0836458
		0.666497	0.0838171
		0.671927	0.083845
		0.667226	0.0839261
		0.669722	0.0842577
		0.67	0.0853809
		0.703161	0.0857444
		0.673458	0.085958
		0.716047	0.0870103
		0.69104	0.0877709
		0.692177	0.0877876
		0.722311	0.0893488
		0.724423	0.0897697
		0.741031	0.0908457
		0.766053	0.0932046
		0.764464	0.0948934
		0.858176	0.101177
		0.873019	0.10172
		0.971993	0.112033
		0.997389	0.116482
		1.30918	0.138416
		1.92055	0.176922
		2.78395	0.227068
		3.25896	0.254675
		IsoLine	IsoLine
[truncated: 102 more columns]

## Sheet: PlotDat1
Source sheet	all data	0.537998	0.0698302	0	0	0.103498	0.0156334	0.604688	0.077423	0.618365	0.0781956	0.664998	0.0778973	0.647136	0.0821122	0.65252	0.0833919	0.671724	0.0832256	0.658559	0.0835716	0.676506	0.0839744	0.669715	0.0842652	0.674523	0.0844512	0.672314	0.0840981	0.677682	0.0847799	0.679457	0.0851974	0.69249	0.0850604	0.674995	0.0851757	0.69525	0.0851793	0.688862	0.0862278	0.694015	0.0870985	0.705411	0.0858133	0.678683	0.0865478	0.689149	0.0869942
Plot name	Concordia0	0.549994	0.0709535	0.0345435	0.00536346	0.217708	0.0315113	0.601896	0.0779101	0.615496	0.0788483	0.662393	0.0792992	0.644067	0.0827859	0.649562	0.0837974	0.670025	0.0838337	0.656865	0.0841718	0.673382	0.0845977	0.666746	0.0846987	0.67267	0.0851281	0.670524	0.0848116	0.675882	0.0854832	0.677676	0.0858396	0.690653	0.0857691	0.673287	0.0857826	0.693313	0.0860316	0.685848	0.0866094	0.690726	0.0875743	0.7035	0.0866309	0.675612	0.0871726	0.685979	0.0875859
Plot Type	1	0.549446	0.071827	0.0702803	0.0107557	0.343738	0.0476374	0.593928	0.0777427	0.607319	0.0788615	0.654851	0.0803745	0.63532	0.0827681	0.6411	0.0834973	0.665159	0.0840858	0.652016	0.0844056	0.664465	0.0845236	0.658256	0.0844383	0.667368	0.0854136	0.665404	0.0851594	0.670735	0.0858159	0.67258	0.086104	0.685395	0.0861064	0.668401	0.0860232	0.687769	0.0865176	0.677217	0.0862839	0.681319	0.0872823	0.698025	0.087085	0.666857	0.087094	0.676932	0.0874506
1st free col	153	0.573993	0.07425	0.107252	0.0161768	0.482812	0.0640155	0.581428	0.0769342	0.594499	0.078234	0.642702	0.0810762	0.621606	0.0820602	0.627821	0.082516	0.657339	0.0839709	0.644227	0.0842627	0.650479	0.0837578	0.644932	0.0835051	0.658848	0.0852952	0.657179	0.0851263	0.662465	0.0857635	0.664392	0.085979	0.676944	0.0860576	0.660551	0.0858871	0.678859	0.0866161	0.663667	0.0852776	0.666554	0.086246	0.689226	0.0871557	0.653128	0.0863184	0.66274	0.0865993
Sigma Level	2	0.581634	0.0750883	0.1455	0.0216271	0.636279	0.0806498	0.56541	0.0755502	0.578073	0.0770166	0.626478	0.0813737	0.604034	0.0807195	0.610801	0.0809329	0.646906	0.083494	0.633836	0.0837495	0.632556	0.0823625	0.627853	0.0819746	0.647482	0.0847781	0.646208	0.0847138	0.651434	0.0853284	0.653469	0.08547	0.66567	0.0856247	0.650078	0.0853802	0.666974	0.0863228	0.646296	0.083672	0.647628	0.0845494	0.677488	0.0868398	0.635537	0.0849085	0.644554	0.085101
Absolute Errs	FALSE	0.597564	0.0756889	0.18507	0.0271065	0.805631	0.097544	0.547171	0.0737028	0.559372	0.0753081	0.606887	0.0812539	0.584028	0.0788548	0.591417	0.0788763	0.634317	0.0826761	0.621298	0.0828882	0.612148	0.0804506	0.608404	0.079971	0.633769	0.0838848	0.632971	0.0839399	0.638125	0.0845294	0.640288	0.0845994	0.652067	0.0848268	0.637441	0.0845246	0.652631	0.0856505	0.626512	0.0815973	0.626075	0.08233	0.663323	0.0861513	0.615509	0.0829786	0.623847	0.0830771
Symbol Type	1	0.584713	0.0757876	0.226006	0.0326154	0.99251	0.114702	0.528189	0.0715417	0.539911	0.0732468	0.584785	0.0807222	0.563209	0.0766169	0.571241	0.0765129	0.620122	0.0815527	0.607162	0.0817167	0.590908	0.0781772	0.588159	0.0776565	0.618306	0.0826544	0.618046	0.0828383	0.623118	0.0834015	0.625427	0.0834052	0.636727	0.0836986	0.623193	0.0833577	0.63646	0.0846286	0.605917	0.0792215	0.603641	0.0797675	0.647351	0.0851201	0.594666	0.080685	0.602296	0.0806915
Inverse Plot	FALSE	0.601884	0.075987	0.268357	0.0381538	1.19873	0.132129	0.510002	0.0692419	0.521268	0.0709997	0.561139	0.0798017	0.543264	0.0741874	0.551907	0.074034	0.604941	0.0801731	0.592044	0.080286	0.570558	0.0757263	0.568759	0.0752185	0.601769	0.0811407	0.602084	0.0814574	0.607069	0.0819941	0.609534	0.0819395	0.620323	0.0822895	0.607956	0.0819306	0.619165	0.0833018	0.58618	0.076737	0.582143	0.0770697	0.630269	0.0837915	0.574698	0.0782136	0.581648	0.0781376
Color Plot	TRUE	0.598588	0.0761335	0.31217	0.0437219	1.42629	0.149828	0.494083	0.0669898	0.504951	0.0687489	0.536982	0.0785327	0.525808	0.0717629	0.534981	0.0716405	0.589437	0.0785975	0.576606	0.0786587	0.552746	0.0732966	0.551775	0.0728547	0.584883	0.0794098	0.585785	0.0798573	0.590681	0.0803686	0.593303	0.0802665	0.60357	0.080661	0.592395	0.0803056	0.601503	0.081728	0.5689	0.0743452	0.563322	0.0744549	0.612825	0.0822233	0.557221	0.0757645	0.563574	0.0756221
3D plot	FALSE	0.593747	0.0761717	0.357497	0.0493199	1.67741	0.167804	0.481721	0.0649678	0.492284	0.0666767	0.51337	0.0769705	0.512256	0.0695399	0.521835	0.0695264	0.574289	0.0768948	0.561522	0.0769059	0.538914	0.0710848	0.538584	0.0707566	0.568383	0.0775374	0.56986	0.0781081	0.574669	0.0785961	0.577445	0.0784592	0.587202	0.0788844	0.577192	0.0785537	0.584247	0.0799761	0.555477	0.0722398	0.548704	0.0721351	0.59578	0.0804842	0.543652	0.0735363	0.54954	0.073349
Linear	FALSE	0.594348	0.0764445	0.40439	0.0549478	IsoLine	IsoLine	0.473919	0.0633398	0.484292	0.0649509	0.491335	0.0751836	0.503706	0.0676985	0.513533	0.0678628	0.560158	0.0751394	0.547452	0.0751042	0.530184	0.0692701	0.530254	0.069094	0.552992	0.0756054	0.555005	0.0762862	0.559732	0.076754	0.562652	0.0765966	0.571932	0.0770373	0.56301	0.0767515	0.568149	0.0781225	0.546998	0.0705914	0.539473	0.0702982	0.57988	0.0786501	0.535089	0.0717093	0.540683	0.0715023
Data Range	AC3:AG74	0.599289	0.0770045	0.452903	0.060606			0.471308	0.0622375	0.481622	0.0637115	0.471839	0.07325	0.50085	0.0663878	0.510749	0.0667846	0.547661	0.073408	0.53501	0.0733325	0.527263	0.0679996	0.52746	0.0680017	0.539382	0.073698	0.54187	0.0744712	0.546525	0.0749229	0.549572	0.0747602	0.558429	0.0752004	0.550469	0.0749777	0.553914	0.0762484	0.54415	0.0695335	0.536376	0.069093	0.56582	0.0768013	0.532228	0.0704316	0.537719	0.0702316
Filled Symbols	FALSE	0.601821	0.0771946	0.503091	0.0662945			0.4741	0.0617504	0.484492	0.0630588	0.455735	0.0712542	0.503919	0.0657141	0.513707	0.0663791	0.537346	0.0717763	0.524741	0.071668	0.530387	0.0673762	0.530429	0.0675682	0.528148	0.0718988	0.531029	0.0727424	0.535624	0.0731827	0.538774	0.0730301	0.547284	0.073454	0.540118	0.0733099	0.542164	0.0744356	0.547164	0.0691519	0.539665	0.0686172	0.554213	0.0750185	0.535299	0.0698068	0.540889	0.06964
ConcAge	FALSE	0.612355	0.077271	0.555013	0.0720136			0.482069	0.0619178	0.492668	0.0630456	0.443727	0.0692835	0.512666	0.0657319	0.522168	0.0666792	0.529663	0.0703155	0.517093	0.0701836	0.539303	0.0674504	0.538919	0.0678286	0.519782	0.0702863	0.522954	0.0711754	0.527505	0.0716096	0.530733	0.0714821	0.538982	0.0718744	0.532409	0.071821	0.533412	0.0727633	0.555796	0.0694774	0.549073	0.0689092	0.545568	0.0733797	0.544053	0.0698854	0.549936	0.0697753
ConcSwap	FALSE	0.600564	0.0774025	0.608729	0.0777633			0.494568	0.0627263	0.505489	0.0636731	0.436339	0.0674239	0.526381	0.0664399	0.535447	0.0676606	0.524947	0.0690897	0.5124	0.068944	0.553289	0.0682162	0.552243	0.0687618	0.514647	0.0689311	0.518	0.0698388	0.522523	0.0702722	0.525798	0.0701837	0.533887	0.0705307	0.527678	0.070576	0.528041	0.0713046	0.569346	0.0704837	0.563837	0.0699455	0.540262	0.0719564	0.557782	0.0706611	0.564127	0.0706266
1st Symbol-row	1	0.610768	0.0776514	0.6643	0.0835438			0.510586	0.0641103	0.521915	0.0648904	0.433895	0.0657567	0.543953	0.0677805	0.552468	0.0692436	0.523405	0.0681522	0.510867	0.0680036	0.571213	0.0696115	0.569322	0.0702923	0.51297	0.0678923	0.516383	0.0687908	0.520897	0.0692291	0.524185	0.0691917	0.532221	0.0694815	0.526132	0.0696294	0.526285	0.0701234	0.586717	0.0720893	0.582763	0.0716421	0.538527	0.0708109	0.575374	0.0720709	0.582313	0.0721248
		0.616506	0.0778807	0.721791	0.0893554			0.528825	0.0659576	0.540616	0.0665989	0.4365	0.0643548	0.563958	0.0696453	0.571851	0.0713002	0.525104	0.0675442	0.512562	0.0674034	0.591621	0.0715234	0.588772	0.0722959	0.514823	0.0672153	0.518173	0.0680773	0.522697	0.0685258	0.525966	0.0685495	0.534057	0.0687728	0.52784	0.0690225	0.528222	0.0692711	0.606501	0.074164	0.604316	0.0738615	0.540438	0.0699933	0.595402	0.0740008	0.603021	0.0741487
		0.615196	0.0780958	0.781268	0.0951981			0.547807	0.0681187	0.560076	0.0686602	0.444042	0.0632795	0.584777	0.0718831	0.592028	0.0736637	0.52997	0.0672921	0.51741	0.0671696	0.61286	0.0737968	0.609016	0.0746104	0.520126	0.0669298	0.523292	0.0677295	0.527844	0.0681931	0.531062	0.0682852	0.539316	0.0684355	0.532726	0.0687819	0.533766	0.0687851	0.627095	0.0765398	0.62675	0.076424	0.545913	0.0695392	0.616244	0.0762944	0.624571	0.0765343
		0.621969	0.0783121	0.842799	0.101072			0.565994	0.0704185	0.57872	0.0709073	0.456191	0.0625778	0.604722	0.0743127	0.611362	0.0761425	0.53779	0.067407	0.5252	0.0673125	0.63321	0.0762477	0.628417	0.0770484	0.528646	0.0670482	0.531517	0.0677626	0.536113	0.0682454	0.539251	0.0684102	0.547767	0.0684843	0.540577	0.068918	0.542676	0.0686866	0.646832	0.0790243	0.648248	0.0791218	0.554712	0.0694685	0.636213	0.0787658	0.64522	0.0790883
		0.605455	0.0784897	0.906456	0.106978			0.581914	0.0726706	0.595037	0.0731582	0.472415	0.0622803	0.622178	0.0767372	0.628288	0.078536	0.548223	0.0678838	0.535591	0.0678258	0.651023	0.0786774	0.6454	0.0794122	0.540011	0.0675653	0.542488	0.0681751	0.547144	0.0686806	0.550174	0.0689191	0.55904	0.0689172	0.551049	0.0694249	0.554562	0.0689799	0.664112	0.0814161	0.667069	0.0817366	0.566451	0.0697843	0.65369	0.0812149	0.663293	0.0816037
		0.613434	0.0786129	0.972312	0.112915			0.594275	0.0746926	0.607704	0.0752304	0.492006	0.0624001	0.63573	0.0789602	0.641434	0.0806502	0.560812	0.0687018	0.548129	0.068687	0.664854	0.0808892	0.658591	0.0815104	0.553725	0.0684586	0.555726	0.0689491	0.560454	0.0694796	0.563354	0.0697897	0.572644	0.0697152	0.563686	0.0702805	0.568904	0.0696522	0.677535	0.0835215	0.681687	0.0840564	0.580615	0.0704729	0.667259	0.0834431	0.677327	0.0838769
		0.62173	0.0788985	1.04044	0.118884			0.602077	0.0763207	0.615696	0.0769561	0.514108	0.0629318	0.64428	0.0808016	0.649735	0.0823137	0.575007	0.0698251	0.562265	0.0698586	0.673584	0.0827039	0.666921	0.0831729	0.569188	0.069689	0.570651	0.0700506	0.575461	0.0706074	0.578216	0.070984	0.587983	0.0708434	0.577934	0.0714473	0.585075	0.0706741	0.686014	0.0851699	0.690918	0.0858933	0.596588	0.071504	0.675821	0.0852701	0.686185	0.0857236
		0.629038	0.0789069	1.11093	0.124885			0.604688	0.077423	0.618365	0.0781956	0.537754	0.0638523	0.647136	0.0821122	0.65252	0.0833919	0.590188	0.0712047	0.577383	0.0712893	0.676506	0.0839744	0.669715	0.0842652	0.585724	0.0712027	0.586612	0.0714315	0.591509	0.0720148	0.594109	0.0724496	0.604388	0.0722525	0.593172	0.0728745	0.60237	0.0720009	0.688862	0.0862278	0.694015	0.0870985	0.613669	0.0728327	0.678683	0.0865478	0.689149	0.0869942
		0.62444	0.0789767	1.18385	0.130918							0.561911	0.0651214					0.605692	0.0727803	0.592821	0.0729166					0.602611	0.0729336	0.602912	0.0730316	0.607898	0.0736403	0.610339	0.0741227	0.62114	0.0738809	0.608732	0.0744995	0.620032	0.0735747					0.631113	0.0744009
		0.624335	0.0790456	1.25928	0.136984							0.585523	0.0666835					0.62084	0.074483	0.607904	0.0746693					0.61911	0.074806	0.618837	0.0747808	0.62391	0.0754129	0.626197	0.07593	0.637509	0.0756575	0.623935	0.0762514	0.637289	0.0753266					0.648158	0.07614
		0.627411	0.0791683	1.33733	0.143082							0.607558	0.0684704					0.634971	0.0762384	0.621975	0.076471					0.634501	0.0767381	0.633691	0.0766027	0.638846	0.0772549	0.64099	0.0777925	0.652778	0.0775046	0.638117	0.0780536	0.653386	0.0771802					0.664058	0.0779741
		0.628128	0.0792573	1.41807	0.149213							0.627054	0.070404					0.647467	0.0779698	0.634416	0.0782428					0.648111	0.0786454	0.646826	0.0784177	0.652054	0.0790861	0.654071	0.079629	0.666281	0.0793415	0.650658	0.0798274	0.667621	0.0790543					0.678118	0.0798229
		0.630927	0.0793034	1.50159	0.155377							0.643158	0.0723998					0.657783	0.0796016	0.644686	0.0799073					0.659345	0.0804446	0.657668	0.0801465	0.662955	0.0808262	0.664868	0.081359	0.677427	0.081088	0.661009	0.0814951	0.679372	0.0808671					0.689725	0.0816057
		0.619379	0.0794181	1.58801	0.161574							0.655166	0.0743705					0.665466	0.0810623	0.652334	0.0813917					0.667712	0.0820571	0.665743	0.0817135	0.671074	0.0823994	0.67291	0.0829071	0.685729	0.0826675	0.668719	0.0829841	0.688123	0.0825394					0.69837	0.0832445
		0.6298	0.0797491	1.67741	0.167804							0.662554	0.0762301					0.670182	0.0822881	0.657027	0.0826312					0.672846	0.0834124	0.670697	0.0830502	0.676055	0.0837367	0.677845	0.0842054	0.690824	0.0840113	0.67345	0.084229	0.693495	0.0839981					0.703676	0.0846678
		0.636613	0.0799789	1.76989	0.174067							0.664998	0.0778973					0.671724	0.0832256	0.658559	0.0835716					0.674523	0.0844512	0.672314	0.0840981	0.677682	0.0847799	0.679457	0.0851974	0.69249	0.0850604	0.674995	0.0851757	0.69525	0.0851793					0.705411	0.0858133
		0.642869	0.0800923	1.8	0.176049
		0.63092	0.0801246	IsoLine	IsoLine
		0.641899	0.0802
		0.638808	0.0802264
		0.633488	0.0804087
		0.646357	0.0812499
		0.657497	0.0814521
		0.642697	0.0818423
		0.642191	0.0820823
		0.66612	0.0821662
		0.642704	0.0823729
		0.662146	0.0824366
		0.655795	0.0827737
		0.674735	0.0830796
		0.674906	0.0831158
		0.669242	0.0831375
		0.677241	0.0832561
		0.681828	0.0836458
		0.666497	0.0838171
		0.671927	0.083845
		0.667226	0.0839261
		0.669722	0.0842577
		0.67	0.0853809
		0.703161	0.0857444
		0.673458	0.085958
		0.716047	0.0870103
		0.69104	0.0877709
		0.692177	0.0877876
		0.722311	0.0893488
		0.724423	0.0897697
		0.741031	0.0908457
		0.766053	0.0932046
		0.764464	0.0948934
		0.858176	0.101177
		0.873019	0.10172
		0.971993	0.112033
		0.997389	0.116482
		1.30918	0.138416
		1.92055	0.176922
		2.78395	0.227068
		3.25896	0.254675
		IsoLine	IsoLine
[truncated: 102 more columns]

## Sheet: PlotDat2
Source sheet	all data	0.537998	0.0698302	0.454796	0.0607196	0.483784	0.0640155	0.513349	0.0673218	0.543504	0.0706383	0.574259	0.0739651	0.605627	0.0773023	0.637621	0.0806498	0.430387	0.058	0.431276	0.058	0.429504	0.058	0.425533	0.0574338	0.604688	0.077423	0.618365	0.0781956	0.664998	0.0778973	0.598037	0.076246
Plot name	Concordia0	0.549994	0.0709535	0.454759	0.0607426	0.483744	0.0640399	0.513307	0.0673474	0.543459	0.0706652	0.574211	0.0739934	0.605576	0.0773318	0.637566	0.0806807	0.430387	0.058	0.438009	0.0587812	0.430387	0.0581032	0.45389	0.0607196	0.603995	0.0777416	0.617651	0.0785925	0.66447	0.0785524	0.597287	0.0765937
Plot Type	1	0.549446	0.071827	0.454652	0.0607638	0.48363	0.0640623	0.513184	0.067371	0.543327	0.07069	0.574071	0.0740194	0.605427	0.077359	0.637408	0.0807091	0.438009	0.0588861	0.445672	0.0596664	0.438009	0.0589909	0.482812	0.0640155	0.602016	0.0779063	0.615619	0.0788407	0.66296	0.0791501	0.595148	0.0767826
1st free col	35	IsoLine	IsoLine	0.454483	0.0607814	0.483448	0.0640809	0.51299	0.0673906	0.54312	0.0707106	0.57385	0.0740409	0.605192	0.0773816	0.637158	0.0807327	0.445672	0.0597729	0.453376	0.0605524	0.445672	0.0598794	0.512308	0.0673218	0.598792	0.0779138	0.61231	0.0789353	0.660481	0.0796854	0.591677	0.0768075
Sigma Level	2			0.454267	0.060794	0.483215	0.0640942	0.512741	0.0674046	0.542853	0.0707253	0.573566	0.0740564	0.604889	0.0773978	0.636837	0.0807496	0.453376	0.0606605	0.461122	0.0614391	0.453376	0.0607686	0.542391	0.0706383	0.594384	0.077764	0.607788	0.0788747	0.657055	0.0801536	0.58697	0.0766677
Absolute Errs	FALSE			0.454019	0.0608006	0.48295	0.0641011	0.512456	0.0674119	0.54255	0.070733	0.573242	0.0740644	0.604545	0.0774062	0.63647	0.0807584	0.461122	0.0615488	0.468908	0.0623265	0.461122	0.0616585	0.573073	0.0739651	0.588879	0.0774597	0.602141	0.0786598	0.652711	0.0805507	0.581154	0.0763669
Symbol Type	1			0.453762	0.0608006	0.482673	0.0641011	0.51216	0.0674119	0.542233	0.070733	0.572904	0.0740644	0.604185	0.0774062	0.636089	0.0807584	0.468908	0.0624378	0.476736	0.0632147	0.468908	0.0625492	0.604365	0.0773023	0.582384	0.077007	0.595479	0.078295	0.647487	0.0808735	0.574389	0.0759135
Inverse Plot	FALSE			0.453514	0.060794	0.482408	0.0640942	0.511876	0.0674046	0.541929	0.0707253	0.57258	0.0740564	0.603841	0.0773978	0.635722	0.0807496	0.476736	0.0633276	0.484605	0.0641036	0.476736	0.0634406	0.636279	0.0806498	0.575025	0.0764145	0.587932	0.0777872	0.641425	0.081119	0.566859	0.0753198
Color Plot	TRUE			0.453297	0.0607814	0.482175	0.0640809	0.511626	0.0673906	0.541663	0.0707106	0.572296	0.0740409	0.603538	0.0773816	0.635401	0.0807327	0.484605	0.0642182	0.492517	0.0649932	0.484605	0.0643328	IsoLine	IsoLine	0.566945	0.0756939	0.579646	0.0771465	0.634579	0.0812853	0.55877	0.0746019
3D plot	FALSE			0.453129	0.0607638	0.481994	0.0640623	0.511432	0.067371	0.541455	0.07069	0.572075	0.0740194	0.603303	0.077359	0.635151	0.0807091	0.492517	0.0651095	0.500471	0.0658836	0.492517	0.0652257			0.558301	0.0748592	0.570784	0.0763852	0.627007	0.0813709	0.550341	0.0737795
Linear	FALSE			0.453021	0.0607426	0.481879	0.0640399	0.511309	0.0673474	0.541324	0.0706652	0.571935	0.0739934	0.603154	0.0773318	0.634993	0.0806807	0.500471	0.0660015	0.508467	0.0667748	0.500471	0.0661194			0.549263	0.0739266	0.561516	0.0755182	0.618773	0.081375	0.541803	0.072875
Data Range	AC3:AG5			0.452985	0.0607196	0.481839	0.0640155	0.511267	0.0673218	0.541279	0.0706383	0.571887	0.0739651	0.603103	0.0773023	0.634938	0.0806498	0.508467	0.0668943	0.516505	0.0676666	0.508467	0.0670139			0.540005	0.0729142	0.552025	0.0745624	0.609947	0.0812977	0.53339	0.071913
Filled Symbols	FALSE			0.453021	0.0606965	0.481879	0.0639912	0.511309	0.0672961	0.541324	0.0706113	0.571935	0.0739368	0.603154	0.0772727	0.634993	0.0806188	0.516505	0.0677878	0.524587	0.0685593	0.516505	0.067909			0.530708	0.0718419	0.542493	0.0735363	0.600605	0.0811396	0.525329	0.0709199
ConcAge	TRUE			0.453129	0.0606753	0.481994	0.0639688	0.511432	0.0672725	0.541455	0.0705865	0.572075	0.0739108	0.603303	0.0772455	0.635151	0.0805904	0.524587	0.0686821	0.532712	0.0694527	0.524587	0.068805			0.521553	0.0707303	0.533108	0.0724599	0.590827	0.0809021	0.517842	0.0699226
ConcSwap	FALSE			0.453297	0.0606577	0.482175	0.0639502	0.511626	0.067253	0.541663	0.070566	0.572296	0.0738893	0.603538	0.0772229	0.635401	0.0805668	0.532712	0.0695771	0.54088	0.0703468	0.532712	0.0697016			0.512718	0.0696013	0.524052	0.0713542	0.580696	0.0805871	0.511132	0.0689485
1st Symbol-row	1			0.453514	0.0606451	0.482408	0.0639369	0.511876	0.0672389	0.541929	0.0705512	0.57258	0.0738738	0.603841	0.0772067	0.635722	0.0805499	0.54088	0.0704729	0.549091	0.0712416	0.54088	0.0705991			0.504375	0.0684767	0.5155	0.0702407	0.570298	0.0801973	0.505383	0.068024
				0.453762	0.0606385	0.482673	0.06393	0.51216	0.0672316	0.542233	0.0705436	0.572904	0.0738658	0.604185	0.0771983	0.636089	0.0805411	0.549091	0.0713695	0.557346	0.0721373	0.549091	0.0714973			0.496687	0.0673785	0.50762	0.0691411	0.559722	0.0797362	0.50075	0.0671744
				0.454019	0.0606385	0.48295	0.06393	0.512456	0.0672316	0.54255	0.0705436	0.573242	0.0738658	0.604545	0.0771983	0.63647	0.0805411	0.557346	0.0722667	0.565645	0.0730336	0.557346	0.0723962			0.489802	0.0663279	0.500564	0.0680768	0.549059	0.0792076	0.497362	0.0664229
				0.454267	0.0606451	0.483215	0.0639369	0.512741	0.0672389	0.542853	0.0705512	0.573566	0.0738738	0.604889	0.0772067	0.636837	0.0805499	0.565645	0.0731648	0.573989	0.0739308	0.565645	0.0732959			0.483856	0.0653456	0.494471	0.0670685	0.538399	0.078616	0.49531	0.0657899
				0.454483	0.0606577	0.483448	0.0639502	0.51299	0.067253	0.54312	0.070566	0.57385	0.0738893	0.605192	0.0772229	0.637158	0.0805668	0.573989	0.0740636	0.582377	0.0748286	0.573989	0.0741964			0.478964	0.0644505	0.489458	0.0661357	0.527833	0.0779665	0.494649	0.0652927
				0.454652	0.0606753	0.48363	0.0639688	0.513184	0.0672725	0.543327	0.0705865	0.574071	0.0739108	0.605427	0.0772455	0.637408	0.0805904	0.582377	0.0749631	0.590809	0.0757272	0.582377	0.0750976			0.47522	0.0636602	0.485624	0.0652968	0.517451	0.0772646	0.495399	0.0649449
				0.454759	0.0606965	0.483744	0.0639912	0.513307	0.0672961	0.543459	0.0706113	0.574211	0.0739368	0.605576	0.0772727	0.637566	0.0806188	0.590809	0.0758634	0.599287	0.0766266	0.590809	0.0759995			0.472699	0.0629899	0.483042	0.0645679	0.507343	0.0765164	0.497539	0.0647561
				0.454796	0.0607196	0.483784	0.0640155	0.513349	0.0673218	0.543504	0.0706383	0.574259	0.0739651	0.605627	0.0773023	0.637621	0.0806498	0.599287	0.0767644	0.607809	0.0775267	0.599287	0.0769022			0.471448	0.0624528	0.481764	0.0639634	0.497593	0.0757281	0.501009	0.0647312
				ConcTikEll	ConcTikEll	ConcTikEll	ConcTikEll	ConcTikEll	ConcTikEll	ConcTikEll	ConcTikEll	ConcTikEll	ConcTikEll	ConcTikEll	ConcTikEll	ConcTikEll	ConcTikEll	0.607809	0.0776662	0.616377	0.0784276	0.607809	0.0778057			0.471493	0.0620592	0.481814	0.0634949	0.488287	0.0749065	0.505717	0.064871
																		0.616377	0.0785688	0.624991	0.0793292	0.616377	0.0787099			0.472832	0.061817	0.48319	0.0631716	0.479501	0.0740587	0.511532	0.0651718
																		0.624991	0.0794721	0.633651	0.0802316	0.624991	0.0796149			0.47544	0.0617306	0.485867	0.0629997	0.471313	0.0731918	0.518297	0.0656252
																		0.633651	0.0803762	0.642357	0.0811348	0.633651	0.0805207			0.479265	0.061802	0.489792	0.0629826	0.463791	0.0723133	0.525827	0.0662189
																		0.642357	0.081281	0.651109	0.0820386	0.642357	0.0814272			0.484234	0.0620296	0.494889	0.0631207	0.457	0.0714306	0.533917	0.0669368
																		0.651109	0.0821866	0.659908	0.0829433	0.651109	0.0823345			0.490248	0.062409	0.501059	0.0634113	0.450998	0.0705513	0.542345	0.0677592
																		0.659908	0.0830929	0.668754	0.0838487	0.659908	0.0832425			0.497193	0.0629329	0.50818	0.0638487	0.445836	0.0696829	0.550883	0.0686637
																		0.668754	0.084	0.670238	0.084	0.667281	0.084			0.504931	0.063591	0.516116	0.0644243	0.441557	0.0688328	0.559297	0.0696256
																		0.668754	0.084	ConcBand	ConcBand	ConcBand	ConcBand			0.513313	0.0643706	0.524711	0.065127	0.4382	0.0680082	0.567357	0.0706188
																		IsoLine	IsoLine							0.522176	0.0652564	0.533798	0.0659432	0.435791	0.0672162	0.574845	0.071616
																										0.531347	0.0662313	0.543201	0.0668568	0.434352	0.0664636	0.581554	0.0725902
																										0.540647	0.0672762	0.552735	0.0678502	0.433895	0.0657567	0.587304	0.0735147
																										0.549895	0.0683708	0.562217	0.068904	0.434423	0.0651016	0.591936	0.0743643
																										0.558912	0.0694938	0.57146	0.0699977	0.435933	0.0645039	0.595324	0.0751158
																										0.567522	0.0706234	0.580286	0.07111	0.438412	0.0639686	0.597377	0.0757488
																										0.575557	0.0717375	0.588522	0.0722192	0.441838	0.0635004	0.598037	0.076246
																										0.582861	0.0728145	0.596008	0.0733038	0.446181	0.0631033	Cyan	Cyan
																										0.589292	0.0738335	0.602598	0.0743427	0.451406	0.0627805
																										0.594725	0.0747745	0.608165	0.0753156	0.457468	0.062535
																										0.599053	0.0756192	0.612599	0.0762036	0.464314	0.0623687
																										0.602193	0.0763513	0.615815	0.0769894	0.471886	0.0622831
																										0.604084	0.0769565	0.61775	0.0776577	0.48012	0.062279
																										0.604688	0.077423	0.618365	0.0781956	0.488946	0.0623563
																														0.498288	0.0625144
																														0.508066	0.062752
																														0.518197	0.0630669
																														0.528595	0.0634567
																														0.539171	0.0639178
																														0.549834	0.0644464
																														0.560494	0.065038
																														0.57106	0.0656875
																														0.581442	0.0663894
																														0.59155	0.0671376
																														0.601299	0.0679259
																														0.610606	0.0687475
																														0.619391	0.0695953
																														0.62758	0.0704622
																														0.635102	0.0713407
																														0.641893	0.0722234
																														0.647895	0.0731027
																														0.653057	0.0739711
																														0.657335	0.0748212
																														0.660693	0.0756458
																														0.663102	0.0764378
																														0.664541	0.0771904
																														0.664998	0.0778973

## Sheet: PlotDat6
Source sheet	all data	0.537998	0.0698302	0	0	0.217708	0.0315113	0.604688	0.077423	0.618365	0.0781956	0.664998	0.0778973	0.647136	0.0821122	0.65252	0.0833919	0.671724	0.0832256	0.658559	0.0835716	0.676506	0.0839744	0.669715	0.0842652	0.674523	0.0844512	0.672314	0.0840981	0.677682	0.0847799	0.679457	0.0851974	0.69249	0.0850604	0.674995	0.0851757	0.69525	0.0851793	0.688862	0.0862278	0.694015	0.0870985	0.705411	0.0858133	0.678683	0.0865478	0.689149	0.0869942
Plot name	Concordia0	0.549994	0.0709535	0.0605465	0.0093022	0.482812	0.0640155	0.601896	0.0779101	0.615496	0.0788483	0.662393	0.0792992	0.644067	0.0827859	0.649562	0.0837974	0.668613	0.0839674	0.655458	0.0843001	0.673382	0.0845977	0.666746	0.0846987	0.671132	0.0852783	0.669039	0.0849816	0.674389	0.0856481	0.676198	0.0859804	0.689128	0.0859359	0.67187	0.0859133	0.691705	0.0862522	0.685848	0.0866094	0.690726	0.0875743	0.701912	0.0868395	0.675612	0.0871726	0.685979	0.0875859
Plot Type	1	0.549446	0.071827	0.124759	0.0186909	0.805631	0.097544	0.593928	0.0777427	0.607319	0.0788615	0.654851	0.0803745	0.63532	0.0827681	0.6411	0.0834973	0.659747	0.0840386	0.646626	0.084339	0.664465	0.0845236	0.658256	0.0844383	0.661471	0.0853676	0.659712	0.0851733	0.665012	0.0858162	0.666914	0.0860517	0.679546	0.0861094	0.662968	0.0859615	0.681603	0.0866282	0.677217	0.0862839	0.681319	0.0872823	0.691936	0.0871749	0.666857	0.087094	0.676932	0.0874506
1st free col	153	0.573993	0.07425	0.192859	0.028167	1.19873	0.132129	0.581428	0.0769342	0.594499	0.078234	0.642702	0.0810762	0.621606	0.0820602	0.627821	0.082516	0.645843	0.0834333	0.632777	0.0836851	0.650479	0.0837578	0.644932	0.0835051	0.646324	0.084712	0.645091	0.084658	0.650311	0.0852703	0.652356	0.0854054	0.664522	0.0855669	0.649011	0.0853163	0.665763	0.086277	0.663667	0.0852776	0.666554	0.086246	0.676291	0.0867923	0.653128	0.0863184	0.66274	0.0865993
Sigma Level	2	0.581634	0.0750883	0.265083	0.0377312	1.67741	0.167804	0.56541	0.0755502	0.578073	0.0770166	0.626478	0.0813737	0.604034	0.0807195	0.610801	0.0809329	0.628028	0.0822006	0.615035	0.0823914	0.632556	0.0823625	0.627853	0.0819746	0.626918	0.0833644	0.626358	0.0834772	0.631476	0.0840548	0.633704	0.0840939	0.645271	0.0843522	0.631129	0.08403	0.645467	0.085227	0.646296	0.083672	0.647628	0.0845494	0.656246	0.0857227	0.635537	0.0849085	0.644554	0.085101
Absolute Errs	FALSE	0.597564	0.0756889	0.341679	0.0473844	2.2603	0.204603	0.547171	0.0737028	0.559372	0.0753081	0.606887	0.0812539	0.584028	0.0788548	0.591417	0.0788763	0.607745	0.0804404	0.594836	0.0805627	0.612148	0.0804506	0.608404	0.079971	0.604824	0.0814342	0.605032	0.0817267	0.610033	0.0822682	0.612469	0.0822234	0.623353	0.0825639	0.61077	0.0822068	0.622359	0.0835633	0.626512	0.0815973	0.626075	0.08233	0.633424	0.0840527	0.615509	0.0829786	0.623847	0.0830771
Symbol Type	1	0.584713	0.0757876	0.422913	0.0571274	2.97009	0.242562	0.528189	0.0715417	0.539911	0.0732468	0.584785	0.0807222	0.563209	0.0766169	0.571241	0.0765129	0.586637	0.0782953	0.573817	0.0783471	0.590908	0.0781772	0.588159	0.0776565	0.581832	0.0790776	0.582841	0.0795482	0.587721	0.0800551	0.590372	0.0799456	0.600544	0.0803468	0.589585	0.0799943	0.598313	0.0814206	0.605917	0.0792215	0.603641	0.0797675	0.609674	0.0819176	0.594666	0.080685	0.602296	0.0806915
Inverse Plot	FALSE	0.601884	0.075987	0.509066	0.066961	3.83441	0.281716	0.510002	0.0692419	0.521268	0.0709997	0.561139	0.0798017	0.543264	0.0741874	0.551907	0.074034	0.566414	0.0759389	0.553681	0.0759242	0.570558	0.0757263	0.568759	0.0752185	0.559806	0.0764856	0.561582	0.0771183	0.566345	0.0775948	0.569202	0.0774449	0.578692	0.0778805	0.569289	0.0775719	0.575276	0.0789725	0.58618	0.076737	0.582143	0.0770697	0.58692	0.0794905	0.574698	0.0782136	0.581648	0.0781376
Color Plot	FALSE	0.598588	0.0761335	0.600434	0.0768861	IsoLine	IsoLine	0.494083	0.0669898	0.504951	0.0687489	0.536982	0.0785327	0.525808	0.0717629	0.534981	0.0716405	0.548715	0.0735624	0.536059	0.0734902	0.552746	0.0732966	0.551775	0.0728547	0.54053	0.0738682	0.542978	0.0746338	0.547638	0.0750868	0.550674	0.0749239	0.559568	0.0753648	0.551527	0.0751357	0.555114	0.0764175	0.5689	0.0743452	0.563322	0.0744549	0.567005	0.0769679	0.557221	0.0757645	0.563574	0.0756221
3D plot	FALSE	0.593747	0.0761717	0.697335	0.0869035			0.481721	0.0649678	0.492284	0.0666767	0.51337	0.0769705	0.512256	0.0695399	0.521835	0.0695264	0.534973	0.0713581	0.522379	0.0712424	0.538914	0.0710848	0.538584	0.0707566	0.525564	0.0714374	0.528535	0.072296	0.533116	0.0727341	0.536291	0.0725869	0.54472	0.0730036	0.537737	0.0728832	0.539461	0.0739623	0.555477	0.0722398	0.548704	0.0721351	0.551543	0.0745541	0.543652	0.0735363	0.54954	0.073349
Linear	FALSE	0.594348	0.0764445	0.800103	0.0970141			0.473919	0.0633398	0.484292	0.0649509	0.491335	0.0751836	0.503706	0.0676985	0.513533	0.0678628	0.526302	0.0695046	0.513749	0.0693628	0.530184	0.0692701	0.530254	0.069094	0.516123	0.0693901	0.519424	0.0702942	0.523955	0.0707273	0.527216	0.0706231	0.535351	0.070988	0.529037	0.0709968	0.529584	0.0718061	0.546998	0.0705914	0.539473	0.0702982	0.541787	0.0724449	0.535089	0.0717093	0.540683	0.0715023
Data Range	AC3:AG74	0.599289	0.0770045	0.909093	0.107219			0.471308	0.0622375	0.481622	0.0637115	0.471839	0.07325	0.50085	0.0663878	0.510749	0.0667846	0.523405	0.0681522	0.510867	0.0680036	0.527263	0.0679996	0.52746	0.0680017	0.51297	0.0678923	0.516383	0.0687908	0.520897	0.0692291	0.524185	0.0691917	0.532221	0.0694815	0.526132	0.0696294	0.526285	0.0701234	0.54415	0.0695335	0.536376	0.069093	0.538527	0.0708109	0.532228	0.0704316	0.537719	0.0702316
Filled Symbols	FALSE	0.601821	0.0771946	1.02468	0.117518			0.4741	0.0617504	0.484492	0.0630588	0.455735	0.0712542	0.503919	0.0657141	0.513707	0.0663791	0.526515	0.0674104	0.513969	0.0672751	0.530387	0.0673762	0.530429	0.0675682	0.516361	0.0670652	0.519658	0.0679074	0.52419	0.0683608	0.527444	0.0684087	0.535583	0.068606	0.529257	0.0688917	0.52983	0.0690505	0.547164	0.0691519	0.539665	0.0686172	0.542026	0.0697847	0.535299	0.0698068	0.540889	0.06964
ConcAge	FALSE	0.612355	0.077271	1.14727	0.127914			0.482069	0.0619178	0.492668	0.0630456	0.443727	0.0692835	0.512666	0.0657319	0.522168	0.0666792	0.535382	0.0673392	0.522801	0.0672362	0.539303	0.0674504	0.538919	0.0678286	0.526022	0.0669758	0.528984	0.0677156	0.533567	0.0681928	0.536729	0.0683375	0.545164	0.0684325	0.538159	0.0688435	0.539932	0.0686745	0.555796	0.0694774	0.549073	0.0689092	0.552002	0.0694493	0.544053	0.0698854	0.549936	0.0697753
ConcSwap	FALSE	0.600564	0.0774025	1.27728	0.138406			0.494568	0.0627263	0.505489	0.0636731	0.436339	0.0674239	0.526381	0.0664399	0.535447	0.0676606	0.549286	0.0679445	0.53665	0.0678902	0.553289	0.0682162	0.552243	0.0687618	0.541169	0.0676315	0.543606	0.0682309	0.548268	0.0687386	0.551287	0.0689838	0.560189	0.0689751	0.552116	0.0694887	0.555773	0.0690257	0.569346	0.0704837	0.563837	0.0699455	0.567647	0.0698319	0.557782	0.0706611	0.564127	0.0706266
1st Symbol-row	1	0.610768	0.0776514	1.41516	0.148995			0.510586	0.0641103	0.521915	0.0648904	0.433895	0.0657567	0.543953	0.0677805	0.552468	0.0692436	0.567101	0.0691772	0.554392	0.0691839	0.571213	0.0696115	0.569322	0.0702923	0.560576	0.068979	0.562339	0.0694117	0.567103	0.0699541	0.569939	0.0702953	0.57944	0.0701897	0.569999	0.0707751	0.576069	0.0700757	0.586717	0.0720893	0.582763	0.0716421	0.587692	0.0709015	0.575374	0.0720709	0.582313	0.0721248
		0.616506	0.0778807	1.56139	0.159684			0.528825	0.0659576	0.540616	0.0665989	0.4365	0.0643548	0.563958	0.0696453	0.571851	0.0713002	0.587384	0.0709374	0.574591	0.0710126	0.591621	0.0715234	0.588772	0.0722959	0.58267	0.0709093	0.583664	0.0711623	0.588545	0.0717408	0.591173	0.0721657	0.601358	0.071978	0.590357	0.0725983	0.599176	0.0717394	0.606501	0.074164	0.604316	0.0738615	0.610514	0.0725715	0.595402	0.0740008	0.603021	0.0741487
		0.615196	0.0780958	1.71647	0.170471			0.547807	0.0681187	0.560076	0.0686602	0.444042	0.0632795	0.584777	0.0718831	0.592028	0.0736637	0.608492	0.0730826	0.595609	0.0732281	0.61286	0.0737968	0.609016	0.0746104	0.605661	0.0732658	0.605856	0.0733407	0.610858	0.0739539	0.613271	0.0744435	0.624166	0.0741951	0.611543	0.0748108	0.623222	0.0738821	0.627095	0.0765398	0.62675	0.076424	0.634264	0.0747065	0.616244	0.0762944	0.624571	0.0765343
		0.621969	0.0783121	1.88095	0.181359			0.565994	0.0704185	0.57872	0.0709073	0.456191	0.0625778	0.604722	0.0743127	0.611362	0.0761425	0.628715	0.0754389	0.615745	0.075651	0.63321	0.0762477	0.628417	0.0770484	0.627687	0.0758578	0.627115	0.0757706	0.632234	0.0764141	0.634441	0.0769443	0.646018	0.0766614	0.631838	0.0772332	0.646259	0.0763302	0.646832	0.0790243	0.648248	0.0791218	0.657018	0.0771337	0.636213	0.0787658	0.64522	0.0790883
		0.605455	0.0784897	2.05538	0.192348			0.581914	0.0726706	0.595037	0.0731582	0.472415	0.0622803	0.622178	0.0767372	0.628288	0.078536	0.646414	0.0778155	0.633367	0.078085	0.651023	0.0786774	0.6454	0.0794122	0.646964	0.0784753	0.645719	0.0782551	0.65094	0.0789222	0.652968	0.0794652	0.665143	0.0791771	0.649601	0.0796693	0.666421	0.0788852	0.664112	0.0814161	0.667069	0.0817366	0.676933	0.0796563	0.65369	0.0812149	0.663293	0.0816037
		0.613434	0.0786129	2.24037	0.20344			0.594275	0.0746926	0.607704	0.0752304	0.492006	0.0624001	0.63573	0.0789602	0.641434	0.0806502	0.660156	0.0800197	0.647048	0.0803329	0.664854	0.0808892	0.658591	0.0815104	0.661929	0.0809061	0.660162	0.0805929	0.665462	0.0812749	0.667352	0.0818023	0.679991	0.0815384	0.66339	0.0819219	0.682074	0.0813404	0.677535	0.0835215	0.681687	0.0840564	0.692395	0.08207	0.667259	0.0834431	0.677327	0.0838769
		0.62173	0.0788985	2.43656	0.214635			0.602077	0.0763207	0.615696	0.0769561	0.514108	0.0629318	0.64428	0.0808016	0.649735	0.0823137	0.668826	0.0818732	0.655678	0.0822125	0.673584	0.0827039	0.666921	0.0831729	0.67137	0.0829533	0.669273	0.0825947	0.674624	0.0832816	0.676427	0.083766	0.689359	0.0835539	0.67209	0.0838082	0.691951	0.0834966	0.686014	0.0851699	0.690918	0.0858933	0.702151	0.0841793	0.675821	0.0852701	0.686185	0.0857236
		0.629038	0.0789069	2.64464	0.225933			0.604688	0.077423	0.618365	0.0781956	0.537754	0.0638523	0.647136	0.0821122	0.65252	0.0833919	0.671724	0.0832256	0.658559	0.0835716	0.676506	0.0839744	0.669715	0.0842652	0.674523	0.0844512	0.672314	0.0840981	0.677682	0.0847799	0.679457	0.0851974	0.69249	0.0850604	0.674995	0.0851757	0.69525	0.0851793	0.688862	0.0862278	0.694015	0.0870985	0.705411	0.0858133	0.678683	0.0865478	0.689149	0.0869942
		0.62444	0.0789767	2.86531	0.237337			Black	Black	Black	Black	0.561911	0.0651214	Black	Black	Black	Black	Black	Black	Black	Black	Black	Black	Black	Black	Black	Black	Black	Black	Black	Black	Black	Black	Black	Black	Black	Black	Black	Black	Black	Black	Black	Black	Black	Black	Black	Black	Black	Black
		0.624335	0.0790456	3.09934	0.248847							0.585523	0.0666835
		0.627411	0.0791683	3.34754	0.260464							0.607558	0.0684704
		0.628128	0.0792573	3.61077	0.272189							0.627054	0.070404
		0.630927	0.0793034	3.88993	0.284024							0.643158	0.0723998
		0.619379	0.0794181	4.186	0.295968							0.655166	0.0743705
		0.6298	0.0797491	4.49999	0.308023							0.662554	0.0762301
		0.636613	0.0799789	4.5	0.308023							0.664998	0.0778973
		0.642869	0.0800923	IsoLine	IsoLine							Black	Black
		0.63092	0.0801246
		0.641899	0.0802
		0.638808	0.0802264
		0.633488	0.0804087
		0.646357	0.0812499
		0.657497	0.0814521
		0.642697	0.0818423
		0.642191	0.0820823
		0.66612	0.0821662
		0.642704	0.0823729
		0.662146	0.0824366
		0.655795	0.0827737
		0.674735	0.0830796
		0.674906	0.0831158
		0.669242	0.0831375
		0.677241	0.0832561
		0.681828	0.0836458
		0.666497	0.0838171
		0.671927	0.083845
		0.667226	0.0839261
		0.669722	0.0842577
		0.67	0.0853809
		0.703161	0.0857444
		0.673458	0.085958
		0.716047	0.0870103
		0.69104	0.0877709
		0.692177	0.0877876
		0.722311	0.0893488
		0.724423	0.0897697
		0.741031	0.0908457
		0.766053	0.0932046
		0.764464	0.0948934
		0.858176	0.101177
		0.873019	0.10172
		0.971993	0.112033
		0.997389	0.116482
		1.30918	0.138416
		1.92055	0.176922
		2.78395	0.227068
		3.25896	0.254675
		IsoLine	IsoLine
[truncated: 102 more columns]

## Sheet: PlotDat4
Source sheet	all data	0.537998	0.0698302	0.447683	0.06	0.482812	0.0640155	0.604688	0.077423	0.618365	0.0781956	0.664998	0.0778973	0.647136	0.0821122	0.65252	0.0833919	0.671724	0.0832256	0.658559	0.0835716	0.676506	0.0839744	0.669715	0.0842652	0.674523	0.0844512	0.672314	0.0840981	0.677682	0.0847799	0.679457	0.0851974	0.69249	0.0850604	0.674995	0.0851757	0.69525	0.0851793	0.688862	0.0862278	0.694015	0.0870985	0.705411	0.0858133	0.678683	0.0865478	0.689149	0.0869942
Plot name	Concordia1	0.549994	0.0709535	0.457846	0.0611736	0.557657	0.0723004	0.603164	0.0778435	0.616797	0.0787355	0.663359	0.0790293	0.645459	0.0826726	0.650907	0.0837579	0.670025	0.0838337	0.656865	0.0841718	0.6748	0.0844986	0.668096	0.0846505	0.67267	0.0851281	0.670524	0.0848116	0.675882	0.0854832	0.677676	0.0858396	0.690653	0.0857691	0.673287	0.0857826	0.694026	0.0858816	0.68722	0.0865765	0.692222	0.087522	0.704204	0.086488	0.677005	0.0870737	0.687418	0.0874982
Plot Type	1	0.549446	0.071827	0.482812	0.0640155	0.636279	0.0806498	0.598792	0.0779138	0.61231	0.0789353	0.658612	0.0799649	0.640659	0.0828649	0.646266	0.083745	0.665159	0.0840858	0.652016	0.0844056	0.669908	0.0846509	0.66344	0.0846636	0.667368	0.0854136	0.665404	0.0851594	0.670735	0.0858159	0.67258	0.086104	0.685395	0.0861064	0.668401	0.0860232	0.690531	0.0863594	0.682487	0.0865452	0.687062	0.0875336	0.700753	0.0869398	0.672201	0.0872244	0.682454	0.0876139
1st free col	253	0.573993	0.07425	0.508205	0.0668651	0.718871	0.0890642	0.591763	0.0776309	0.605099	0.0787863	0.650887	0.0806785	0.632945	0.0826807	0.638801	0.0833538	0.657339	0.0839709	0.644227	0.0842627	0.662043	0.0844245	0.655949	0.0843038	0.658848	0.0852952	0.657179	0.0851263	0.662465	0.0857635	0.664392	0.085979	0.676944	0.0860576	0.660551	0.0858871	0.68486	0.0865996	0.67487	0.0861353	0.678762	0.0871327	0.695152	0.0871562	0.664479	0.0869934	0.674474	0.0873362
Sigma Level	2	0.581634	0.0750883	0.534033	0.0697224	0.805631	0.097544	0.582384	0.077007	0.595479	0.078295	0.640395	0.0811506	0.622654	0.082128	0.628837	0.0826013	0.646906	0.083494	0.633836	0.0837495	0.651548	0.0838294	0.645951	0.083587	0.647482	0.0847781	0.646208	0.0847138	0.651434	0.0853284	0.653469	0.08547	0.66567	0.0856247	0.650078	0.0853802	0.677169	0.0865957	0.664703	0.0853645	0.667683	0.0863368	0.687556	0.0871314	0.654178	0.0863908	0.663825	0.0866772
Absolute Errs	FALSE	0.597564	0.0756889	0.560304	0.0725872	0.89677	0.10609	0.571065	0.0760694	0.583872	0.0774828	0.627422	0.0813684	0.610237	0.081231	0.61681	0.0815204	0.634317	0.0826761	0.621298	0.0828882	0.638883	0.0828915	0.633883	0.0825444	0.633769	0.0838848	0.632971	0.0839399	0.638125	0.0845294	0.640288	0.0845994	0.652067	0.0848268	0.637441	0.0845246	0.667665	0.0863479	0.652429	0.0842667	0.65431	0.0851808	0.678171	0.086866	0.641747	0.0854428	0.650975	0.0856658
Symbol Type	1	0.584713	0.0757876	0.587024	0.0754598	0.99251	0.114702	0.558301	0.0748592	0.570784	0.0763852	0.612323	0.0813259	0.596236	0.0800289	0.603246	0.0801585	0.620122	0.0815527	0.607162	0.0817167	0.624601	0.0816518	0.620273	0.0812216	0.618306	0.0826544	0.618046	0.0828383	0.623118	0.0834015	0.625427	0.0834052	0.636727	0.0836986	0.623193	0.0833577	0.65661	0.0858628	0.638585	0.0828897	0.639228	0.0837151	0.667252	0.0863672	0.62773	0.084191	0.636483	0.0843462
Inverse Plot	FALSE	0.601884	0.075987	0.614202	0.07834	1.09308	0.123382	0.54465	0.0734292	0.556787	0.0750503	0.595508	0.0810244	0.581262	0.0785742	0.588737	0.0785749	0.604941	0.0801731	0.592044	0.080286	0.609327	0.0801646	0.605715	0.0796765	0.601769	0.0811407	0.602084	0.0814574	0.607069	0.0819941	0.609534	0.0819395	0.620323	0.0822895	0.607956	0.0819306	0.644305	0.0851538	0.623776	0.0812939	0.623096	0.0820038	0.655099	0.0856488	0.61274	0.0826899	0.620984	0.0827759
Color Plot	FALSE	0.598588	0.0761335	0.641846	0.081228	1.19873	0.132129	0.530708	0.0718419	0.542493	0.0735363	0.577437	0.0804719	0.565971	0.0769306	0.573918	0.076839	0.589437	0.0785975	0.576606	0.0786587	0.593726	0.0784948	0.590845	0.0779765	0.584883	0.0794098	0.585785	0.0798573	0.590681	0.0803686	0.593303	0.0802665	0.60357	0.080661	0.592395	0.0803056	0.631084	0.0842401	0.60865	0.0795489	0.606618	0.0801217	0.642042	0.0847302	0.597431	0.0810053	0.605156	0.0810238
3D plot	FALSE	0.593747	0.0761717	0.669963	0.0841237	1.30971	0.140944	0.517084	0.0701666	0.528528	0.0719094	0.558602	0.0796837	0.551031	0.0751698	0.559436	0.0750266	0.574289	0.0768948	0.561522	0.0769059	0.578483	0.0767154	0.576314	0.0761959	0.568383	0.0775374	0.56986	0.0781081	0.574669	0.0785961	0.577445	0.0784592	0.587202	0.0788844	0.577192	0.0785537	0.61731	0.0831467	0.593867	0.0777309	0.590515	0.0781511	0.628437	0.0836365	0.582473	0.0792108	0.589689	0.0791663
Linear	FALSE	0.594348	0.0764445	0.698561	0.0870271	1.42629	0.149828	0.504375	0.0684767	0.5155	0.0702407	0.539518	0.0786811	0.537094	0.0733688	0.545924	0.0732168	0.560158	0.0751394	0.547452	0.0751042	0.564262	0.0749041	0.562756	0.0744126	0.552992	0.0756054	0.555005	0.0762862	0.559732	0.076754	0.562652	0.0765966	0.571932	0.0770373	0.56301	0.0767515	0.603357	0.0819034	0.580073	0.0759195	0.575491	0.0761781	0.614656	0.0823977	0.56852	0.0773848	0.575259	0.0772845
Data Range	AC3:AG74	0.599289	0.0770045	0.727649	0.0899383	IsoLine	IsoLine	0.493135	0.0668459	0.50398	0.0686032	0.520704	0.0774916	0.524769	0.0716063	0.533973	0.0714888	0.547661	0.073408	0.53501	0.0733325	0.551685	0.0731402	0.550764	0.0727046	0.539382	0.073698	0.54187	0.0744712	0.546525	0.0749229	0.549572	0.0747602	0.558429	0.0752004	0.550469	0.0749777	0.589606	0.0805441	0.567872	0.0741939	0.562202	0.0742888	0.601074	0.0810473	0.556181	0.075607	0.562499	0.0754609
Filled Symbols	FALSE	0.601821	0.0771946	0.757235	0.0928574			0.483856	0.0653456	0.494471	0.0670685	0.502675	0.0761475	0.514597	0.0699593	0.524105	0.0699182	0.537346	0.0717763	0.524741	0.071668	0.541303	0.0715007	0.540862	0.0711464	0.528148	0.0718988	0.531029	0.0727424	0.535624	0.0731827	0.538774	0.0730301	0.547284	0.073454	0.540118	0.0733099	0.576432	0.0791059	0.557796	0.0726293	0.551229	0.072566	0.588062	0.0796224	0.545995	0.0739552	0.551964	0.073775
ConcAge	FALSE	0.612355	0.077271	0.787328	0.0957842			0.476943	0.0640412	0.487389	0.0657035	0.485921	0.0746857	0.507019	0.0684999	0.516752	0.0685735	0.529663	0.0703155	0.517093	0.0701836	0.533568	0.0700573	0.533484	0.0698061	0.519782	0.0702863	0.522954	0.0711754	0.527505	0.0716096	0.530733	0.0714821	0.538982	0.0718744	0.532409	0.071821	0.564195	0.077628	0.550286	0.0712943	0.543052	0.0710848	0.575975	0.0781617	0.538408	0.0725016	0.544116	0.0723005
ConcSwap	FALSE	0.600564	0.0774025	0.817937	0.0987189			0.472699	0.0629899	0.483042	0.0645679	0.4709	0.0731458	0.50237	0.0672918	0.512233	0.0675135	0.524947	0.0690897	0.5124	0.068944	0.528819	0.068873	0.52895	0.0687424	0.514647	0.0689311	0.518	0.0698388	0.522523	0.0702722	0.525798	0.0701837	0.533887	0.0705307	0.527678	0.070576	0.553229	0.0761507	0.54567	0.0702471	0.538027	0.06991	0.565143	0.0767051	0.533751	0.0713097	0.539297	0.0711019
1st Symbol-row	1	0.610768	0.0776514	0.849069	0.101661			0.471308	0.0622375	0.481622	0.0637115	0.458022	0.0715699	0.50085	0.0663878	0.510749	0.0667846	0.523405	0.0681522	0.510867	0.0680036	0.527263	0.0679996	0.52746	0.0680017	0.51297	0.0678923	0.516383	0.0687908	0.520897	0.0692291	0.524185	0.0691917	0.532221	0.0694815	0.526132	0.0696294	0.543831	0.0747144	0.54415	0.0695335	0.536376	0.069093	0.555861	0.0752924	0.532228	0.0704316	0.537719	0.0702316
		0.616506	0.0778807	0.880735	0.104612			0.472832	0.061817	0.48319	0.0631716	0.447637	0.0700011	0.502527	0.0658274	0.512362	0.0664186	0.525104	0.0675442	0.512562	0.0674034	0.528968	0.0674754	0.529079	0.0676164	0.514823	0.0672153	0.518173	0.0680773	0.522697	0.0685258	0.525966	0.0685495	0.534057	0.0687728	0.52784	0.0690225	0.53626	0.0733582	0.545793	0.0691848	0.538169	0.0686695	0.548382	0.073962	0.533905	0.0699057	0.539449	0.0697276
		0.615196	0.0780958	0.912942	0.10757			0.477204	0.0617466	0.487678	0.0629717	0.44003	0.0684821	0.507327	0.0656351	0.517002	0.0664315	0.52997	0.0672921	0.51741	0.0671696	0.53386	0.0673231	0.533736	0.0676034	0.520126	0.0669298	0.523292	0.0677295	0.527844	0.0681931	0.531062	0.0682852	0.539316	0.0684355	0.532726	0.0687819	0.530721	0.0721191	0.550526	0.0692161	0.543329	0.0686579	0.54291	0.0727503	0.53871	0.069755	0.544413	0.069612
		0.621969	0.0783121	0.945702	0.110536			0.484234	0.0620296	0.494889	0.0631207	0.435407	0.0670543	0.515042	0.0658194	0.524468	0.0668228	0.53779	0.067407	0.5252	0.0673125	0.541726	0.0675495	0.541226	0.0679631	0.528646	0.0670482	0.531517	0.0677626	0.536113	0.0682454	0.539251	0.0684102	0.547767	0.0684843	0.540577	0.068918	0.527366	0.071031	0.558142	0.0696261	0.551629	0.0690588	0.539595	0.0716903	0.546431	0.069986	0.552394	0.0698897
		0.605455	0.0784897	0.979022	0.113511			0.493612	0.0626535	0.504509	0.0636121	0.433895	0.0657567	0.525332	0.0663721	0.534432	0.0675752	0.548223	0.0678838	0.535591	0.0678258	0.55222	0.0681446	0.551224	0.0686799	0.540011	0.0675653	0.542488	0.0681751	0.547144	0.0686806	0.550174	0.0689191	0.55904	0.0689172	0.551049	0.0694249	0.526285	0.0701234	0.56831	0.0703968	0.562708	0.0698547	0.538527	0.0708109	0.556733	0.0705886	0.563042	0.0705486
		0.613434	0.0786129	1.01291	0.116493			0.504931	0.063591	0.516116	0.0644243	0.435534	0.0646247	0.537749	0.0672691	0.546459	0.0686561	0.560812	0.0687018	0.548129	0.068687	0.564885	0.0690825	0.563292	0.0697225	0.553725	0.0684586	0.555726	0.0689491	0.560454	0.0694796	0.563354	0.0697897	0.572644	0.0697152	0.563686	0.0702805	0.527509	0.0694211	0.580584	0.0714946	0.576081	0.0710107	0.539735	0.0701362	0.569163	0.0715366	0.575893	0.07156
		0.62173	0.0788985	1.04738	0.119483			0.517695	0.0648013	0.529204	0.0655219	0.440281	0.0636891	0.551751	0.0684712	0.560023	0.070018	0.575007	0.0698251	0.562265	0.0698586	0.579167	0.0703221	0.576903	0.0710453	0.569188	0.069689	0.570651	0.0700506	0.575461	0.0706074	0.578216	0.070984	0.587983	0.0708434	0.577934	0.0714473	0.531004	0.0689433	0.594427	0.0728716	0.591163	0.0724764	0.543186	0.0696844	0.58318	0.0727884	0.590384	0.0728797
		0.629038	0.0789069	1.08245	0.122481			0.531347	0.0662313	0.543201	0.0668568	0.448006	0.0629756	0.566724	0.0699258	0.574531	0.0716016	0.590188	0.0712047	0.577383	0.0712893	0.594442	0.0718094	0.591461	0.0725904	0.585724	0.0712027	0.586612	0.0714315	0.591509	0.0720148	0.594109	0.0724496	0.604388	0.0722525	0.593172	0.0728745	0.536675	0.0687031	0.609236	0.0744674	0.607296	0.0741877	0.548786	0.069468	0.59817	0.0742895	0.605883	0.0744499
		0.62444	0.0789767	1.11811	0.125487			0.545289	0.0678186	0.557494	0.0683708	0.458498	0.0625034	0.582015	0.0715695	0.589351	0.0733375	0.605692	0.0727803	0.592821	0.0729166	0.610042	0.0734792	0.60633	0.0742904	0.602611	0.0729336	0.602912	0.0730316	0.607898	0.0736403	0.610339	0.0741227	0.62114	0.0738809	0.608732	0.0744995	0.544367	0.068707	0.624363	0.0762124	0.623773	0.0760698	0.556382	0.0694928	0.613479	0.0759741	0.621712	0.0762021
		0.624335	0.0790456	1.15438	0.128501			0.558912	0.0694938	0.57146	0.0699977	0.471471	0.0622856	0.596956	0.0733303	0.603832	0.07515	0.62084	0.074483	0.607904	0.0746693	0.625286	0.0752586	0.620862	0.076071	0.61911	0.074806	0.618837	0.0747808	0.62391	0.0754129	0.626197	0.07593	0.637509	0.0756575	0.623935	0.0762514	0.55387	0.0689548	0.639146	0.0780304	0.639876	0.0780404	0.565767	0.0697582	0.628437	0.0777686	0.637179	0.0780596
		0.627411	0.0791683	1.19128	0.131524			0.571621	0.0711838	0.584488	0.0716663	0.48657	0.0623281	0.610893	0.0751313	0.617344	0.0769597	0.634971	0.0762384	0.621975	0.076471	0.639507	0.0770699	0.634419	0.0778543	0.634501	0.0767381	0.633691	0.0766027	0.638846	0.0772549	0.64099	0.0777925	0.652778	0.0775046	0.638117	0.0780536	0.564925	0.0694399	0.65294	0.0798418	0.6549	0.0800134	0.576686	0.070257	0.642391	0.0795946	0.651608	0.0799413
		0.628128	0.0792573	1.2288	0.134554			0.582861	0.0728145	0.596008	0.0733038	0.503385	0.0626296	0.623217	0.0768938	0.629295	0.0786877	0.647467	0.0779698	0.634416	0.0782428	0.652083	0.0788338	0.646411	0.0795623	0.648111	0.0786454	0.646826	0.0784177	0.652054	0.0790861	0.654071	0.079629	0.666281	0.0793415	0.650658	0.0798274	0.57723	0.0701489	0.665141	0.0815674	0.668189	0.0819027	0.588839	0.0709754	0.65473	0.0813724	0.664369	0.081765
		0.630927	0.0793034	1.26697	0.137593			0.59214	0.0743149	0.605517	0.0748386	0.521456	0.0631821	0.63339	0.0785407	0.639163	0.0802583	0.657783	0.0796016	0.644686	0.0799073	0.662466	0.0804733	0.656313	0.0811206	0.659345	0.0804446	0.657668	0.0801465	0.662955	0.0808262	0.664868	0.081359	0.677427	0.081088	0.661009	0.0814951	0.590451	0.0710626	0.675217	0.083132	0.679162	0.0836255	0.601897	0.071894	0.664916	0.0830242	0.674904	0.0834509
		0.619379	0.0794181	1.30579	0.140639			0.599053	0.0756192	0.612599	0.0762036	0.540291	0.0639703	0.640967	0.0800001	0.646517	0.081603	0.665466	0.0810623	0.652334	0.0813917	0.670201	0.0819167	0.663691	0.0824608	0.667712	0.0820571	0.665743	0.0817135	0.671074	0.0823994	0.67291	0.0829071	0.685729	0.0826675	0.668719	0.0829841	0.604225	0.072156	0.682727	0.084467	0.687339	0.0851067	0.615501	0.0729876	0.672503	0.0844778	0.682752	0.0849253
		0.6298	0.0797491	1.34528	0.143694			0.603298	0.0766706	0.616945	0.0773391	0.559375	0.0649729	0.645617	0.0812082	0.651035	0.082663	0.670182	0.0822881	0.657027	0.0826312	0.67495	0.083101	0.668225	0.0835245	0.672846	0.0834124	0.670697	0.0830502	0.676055	0.0837367	0.677845	0.0842054	0.690824	0.0840113	0.67345	0.084229	0.618178	0.0733993	0.687342	0.0855142	0.692364	0.0862815	0.629283	0.0742265	0.67716	0.0856697	0.687571	0.0861239
		0.636613	0.0799789	1.38544	0.146757			0.604688	0.077423	0.618365	0.0781956	0.578189	0.0661624	0.647136	0.0821122	0.65252	0.0833919	0.671724	0.0832256	0.658559	0.0835716	0.676506	0.0839744	0.669715	0.0842652	0.674523	0.0844512	0.672314	0.0840981	0.677682	0.0847799	0.679457	0.0851974	0.69249	0.0850604	0.674995	0.0851757	0.631929	0.0747586	0.688862	0.0862278	0.694015	0.0870985	0.642864	0.0755769	0.678683	0.0865478	0.689149	0.0869942
		0.642869	0.0800923	1.42629	0.149828			Black	Black	Black	Black	0.596218	0.0675065	Black	Black	Black	Black	Black	Black	Black	Black	Black	Black	Black	Black	Black	Black	Black	Black	Black	Black	Black	Black	Black	Black	Black	Black	0.645103	0.0761968	Black	Black	Black	Black	0.655876	0.0770018	Black	Black	Black	Black
		0.63092	0.0801246	1.42861	0.15							0.612972	0.0689684																									0.65734	0.0776747					0.667963	0.0784625
		0.641899	0.0802	IsoLine	IsoLine							0.627993	0.0705082																									0.668307	0.079152					0.678795	0.079919
		0.638808	0.0802264									0.640871	0.0720841																									0.677704	0.0805883					0.688078	0.0813318
		0.633488	0.0804087									0.651256	0.0736529																									0.685275	0.0819445					0.695556	0.0826622
		0.646357	0.0812499									0.658863	0.0751719																									0.690814	0.0831836					0.701028	0.0838739
		0.657497	0.0814521									0.663486	0.0765997																									0.69417	0.0842717					0.704343	0.0849339
		0.642697	0.0818423									0.664998	0.0778973																									0.69525	0.0851793					0.705411	0.0858133
		0.642191	0.0820823									Black	Black																									Black	Black					Black	Black
		0.66612	0.0821662
		0.642704	0.0823729
		0.662146	0.0824366
		0.655795	0.0827737
		0.674735	0.0830796
		0.674906	0.0831158
		0.669242	0.0831375
		0.677241	0.0832561
		0.681828	0.0836458
		0.666497	0.0838171
		0.671927	0.083845
		0.667226	0.0839261
		0.669722	0.0842577
		0.67	0.0853809
		0.703161	0.0857444
		0.673458	0.085958
		0.716047	0.0870103
		0.69104	0.0877709
		0.692177	0.0877876
		0.722311	0.0893488
		0.724423	0.0897697
		0.741031	0.0908457
		0.766053	0.0932046
		0.764464	0.0948934
		0.858176	0.101177
		0.873019	0.10172
		0.971993	0.112033
		0.997389	0.116482
		1.30918	0.138416
		1.92055	0.176922
		2.78395	0.227068
		3.25896	0.254675
		IsoLine	IsoLine
[truncated: 202 more columns]

## Sheet: PlotDat7
Source sheet	all data	0.573993	0.07425	0.483784	0.0640155	0.513349	0.0673218	0.543504	0.0706383	0.574259	0.0739651	0.605627	0.0773023	0.637621	0.0806498	0.670251	0.0840077	0.48	0.0636975	0.48	0.0635838	0.48	0.0638112	0.45389	0.0607196	0.647136	0.0821122	0.65252	0.0833919	0.658559	0.0835716	0.669715	0.0842652	0.674523	0.0844512	0.672314	0.0840981	0.677682	0.0847799	0.679457	0.0851974	0.623594	0.0795048
Plot name	Concordia3	0.581634	0.0750883	0.483744	0.0640399	0.513307	0.0673474	0.543459	0.0706652	0.574211	0.0739934	0.605576	0.0773318	0.637566	0.0806807	0.670194	0.08404	0.48	0.0636975	0.48	0.0635838	0.48	0.0638112	0.482812	0.0640155	0.646372	0.0825258	0.651787	0.0836776	0.657786	0.0840115	0.66898	0.0845629	0.673678	0.0849448	0.671497	0.0846132	0.676861	0.0852887	0.678645	0.0856665	0.623123	0.0797055
Plot Type	1	0.584713	0.0757876	0.48363	0.0640623	0.513184	0.067371	0.543327	0.07069	0.574071	0.0740194	0.605427	0.077359	0.637408	0.0807091	0.670025	0.0840696	0.48709	0.0644985	0.48709	0.0643833	0.48709	0.0646136	0.512308	0.0673218	0.644199	0.0827784	0.649689	0.083796	0.655591	0.0842913	0.666874	0.0846966	0.671277	0.0852678	0.669179	0.0849693	0.67453	0.0856363	0.676338	0.0859706	0.621776	0.0798045
1st free col	45	0.598588	0.0761335	0.483448	0.0640809	0.51299	0.0673906	0.54312	0.0707106	0.57385	0.0740409	0.605192	0.0773816	0.637158	0.0807327	0.66976	0.0840942	0.494213	0.0653001	0.494213	0.0651834	0.494213	0.0654167	0.542391	0.0706383	0.640659	0.0828649	0.646266	0.083745	0.652016	0.0844056	0.66344	0.0846636	0.667368	0.0854136	0.665404	0.0851594	0.670735	0.0858159	0.67258	0.086104	0.61959	0.0797991
Sigma Level	2	0.593747	0.0761717	0.483215	0.0640942	0.512741	0.0674046	0.542853	0.0707253	0.573566	0.0740564	0.604889	0.0773978	0.636837	0.0807496	0.66942	0.0841119	0.501371	0.0661022	0.501371	0.0659841	0.501371	0.0662203	0.573073	0.0739651	0.635822	0.0827838	0.641585	0.0835255	0.647131	0.0843522	0.658743	0.0844645	0.662025	0.0853796	0.660246	0.0851799	0.665549	0.085824	0.667446	0.0860639	0.616625	0.0796893
Absolute Errs	FALSE	0.594348	0.0764445	0.48295	0.0641011	0.512456	0.0674119	0.54255	0.070733	0.573242	0.0740644	0.604545	0.0774062	0.63647	0.0807584	0.669031	0.084121	0.508563	0.066905	0.508563	0.0667854	0.508563	0.0670246	0.604365	0.0773023	0.629781	0.0825365	0.635737	0.0831418	0.641032	0.084132	0.652875	0.0841033	0.655353	0.0851664	0.653806	0.0850304	0.659074	0.0856604	0.661033	0.0858512	0.612962	0.0794781
Symbol Type	1	0.599289	0.0770045	0.482673	0.0641011	0.51216	0.0674119	0.542233	0.070733	0.572904	0.0740644	0.604185	0.0774062	0.636089	0.0807584	0.668626	0.084121	0.515789	0.0677084	0.515789	0.0675873	0.515789	0.0678294	0.636279	0.0806498	0.622654	0.082128	0.628837	0.0826013	0.633836	0.0837495	0.645951	0.083587	0.647482	0.0847781	0.646208	0.0847138	0.651434	0.0853284	0.653469	0.08547	0.6087	0.0791714
Inverse Plot	FALSE	0.601821	0.0771946	0.482408	0.0640942	0.511876	0.0674046	0.541929	0.0707253	0.57258	0.0740564	0.603841	0.0773978	0.635722	0.0807496	0.668238	0.0841119	0.52305	0.0685124	0.52305	0.0683898	0.52305	0.0686349	0.668829	0.0840077	0.61458	0.0815661	0.621017	0.0819146	0.625684	0.0832119	0.638105	0.0829256	0.638566	0.0842223	0.637601	0.0842362	0.64278	0.0848343	0.644899	0.0849278	0.603955	0.0787775
Color Plot	FALSE	IsoLine	IsoLine	0.482175	0.0640809	0.511626	0.0673906	0.541663	0.0707106	0.572296	0.0740409	0.603538	0.0773816	0.635401	0.0807327	0.667897	0.0840942	0.530346	0.069317	0.530346	0.069193	0.530346	0.069441	IsoLine	IsoLine	0.605717	0.0808618	0.612431	0.081095	0.616734	0.0825299	0.629489	0.082132	0.628777	0.0835098	0.628152	0.083607	0.63328	0.0841878	0.635491	0.084235	0.598858	0.0783072
3D plot	FALSE			0.481994	0.0640623	0.511432	0.067371	0.541455	0.07069	0.572075	0.0740194	0.603303	0.077359	0.635151	0.0807091	0.667632	0.0840696	0.537677	0.0701222	0.537677	0.0699967	0.537677	0.0702477			0.596236	0.0800289	0.603246	0.0801585	0.607162	0.0817167	0.620273	0.0812216	0.618306	0.0826544	0.618046	0.0828383	0.623118	0.0834015	0.625427	0.0834052	0.593547	0.0777732
Linear	FALSE			0.481879	0.0640399	0.511309	0.0673474	0.541324	0.0706652	0.571935	0.0739934	0.603154	0.0773318	0.634993	0.0806807	0.667464	0.08404	0.545043	0.070928	0.545043	0.070801	0.545043	0.071055			0.586322	0.0790835	0.59364	0.0791233	0.597152	0.080788	0.610634	0.0802122	0.607357	0.0816729	0.607477	0.0819452	0.612492	0.0824908	0.614904	0.0824545	0.588168	0.0771901
Data Range	AC6:AG15			0.481839	0.0640155	0.511267	0.0673218	0.541279	0.0706383	0.571887	0.0739651	0.603103	0.0773023	0.634938	0.0806498	0.667406	0.0840077	0.552444	0.0717344	0.552444	0.0716059	0.552444	0.0718629			0.576167	0.0780439	0.5838	0.0780096	0.5869	0.079762	0.600761	0.0791234	0.596143	0.0805843	0.596654	0.0809451	0.601609	0.0814732	0.604126	0.0814014	0.582866	0.0765739
Filled Symbols	FALSE			0.481879	0.0639912	0.511309	0.0672961	0.541324	0.0706113	0.571935	0.0739368	0.603154	0.0772727	0.634993	0.0806188	0.667464	0.0839754	0.559881	0.0725414	0.559881	0.0724114	0.559881	0.0726714			0.565971	0.0769306	0.573918	0.076839	0.576606	0.0786587	0.590845	0.0779765	0.584883	0.0794098	0.585785	0.0798573	0.590681	0.0803686	0.593303	0.0802665	0.577786	0.0759413
ConcAge	TRUE			0.481994	0.0639688	0.511432	0.0672725	0.541455	0.0705865	0.572075	0.0739108	0.603303	0.0772455	0.635151	0.0805904	0.667632	0.0839458	0.567353	0.073349	0.567353	0.0732176	0.567353	0.0734805			0.555931	0.075765	0.564186	0.0756344	0.566469	0.0774994	0.58108	0.0767936	0.573795	0.0781723	0.575083	0.0787031	0.57992	0.0791986	0.582646	0.0790717	0.573068	0.0753096
ConcSwap	FALSE			0.482175	0.0639502	0.511626	0.067253	0.541663	0.070566	0.572296	0.0738893	0.603538	0.0772229	0.635401	0.0805668	0.667897	0.0839212	0.574861	0.0741573	0.574861	0.0740243	0.574861	0.0742902			0.546242	0.07457	0.554794	0.0744191	0.556688	0.0763069	0.571656	0.0755979	0.563095	0.0768959	0.564756	0.077505	0.569537	0.0779859	0.572363	0.0778404	0.568839	0.0746961
1st Symbol-row	1			0.482408	0.0639369	0.511876	0.0672389	0.541929	0.0705512	0.57258	0.0738738	0.603841	0.0772067	0.635722	0.0805499	0.668238	0.0839035	0.582405	0.0749661	0.582405	0.0748316	0.582405	0.0751006			0.537094	0.0733688	0.545924	0.0732168	0.547452	0.0751042	0.562756	0.0744126	0.552992	0.0756054	0.555005	0.0762862	0.559732	0.076754	0.562652	0.0765966	0.565215	0.0741174
				0.482673	0.06393	0.51216	0.0672316	0.542233	0.0705436	0.572904	0.0738658	0.604185	0.0771983	0.636089	0.0805411	0.668626	0.0838944	0.589985	0.0757756	0.589985	0.0756396	0.589985	0.0759115			0.528663	0.0721847	0.53775	0.072051	0.538941	0.0739149	0.554553	0.0732609	0.543682	0.0743258	0.54602	0.0750705	0.550698	0.075527	0.553705	0.0753644	0.562296	0.0735894
				0.48295	0.06393	0.512456	0.0672316	0.54255	0.0705436	0.573242	0.0738658	0.604545	0.0771983	0.63647	0.0805411	0.669031	0.0838944	0.597601	0.0765856	0.597601	0.0764482	0.597601	0.0767231			0.521115	0.0710408	0.530429	0.0709443	0.531322	0.072762	0.547208	0.072165	0.535347	0.0730823	0.537976	0.0738815	0.542609	0.0743288	0.545693	0.0741678	0.560159	0.0731265
				0.483215	0.0639369	0.512741	0.0672389	0.542853	0.0705512	0.573566	0.0738738	0.604889	0.0772067	0.636837	0.0805499	0.66942	0.0839035	0.605254	0.0773963	0.605254	0.0772573	0.605254	0.0775353			0.514597	0.0699593	0.524105	0.0699182	0.524741	0.071668	0.540862	0.0711464	0.528148	0.0718988	0.531029	0.0727424	0.535624	0.0731827	0.538774	0.0730301	0.558865	0.0727412
				0.483448	0.0639502	0.51299	0.067253	0.54312	0.070566	0.57385	0.0738893	0.605192	0.0772229	0.637158	0.0805668	0.66976	0.0839212	0.612944	0.0782076	0.612944	0.0780671	0.612944	0.0783481			0.509234	0.0689614	0.518901	0.0689928	0.519328	0.0706542	0.535641	0.0702248	0.522227	0.0707985	0.525314	0.0716754	0.529877	0.072111	0.533083	0.0719735	0.558448	0.0724441
				0.48363	0.0639688	0.513184	0.0672725	0.543327	0.0705865	0.574071	0.0739108	0.605427	0.0772455	0.637408	0.0805904	0.670025	0.0839458	0.62067	0.0790195	0.62067	0.0788775	0.62067	0.0791615			0.505132	0.0680664	0.514918	0.068186	0.515187	0.0697403	0.531644	0.0694182	0.517697	0.0698028	0.520943	0.0707012	0.525482	0.0711345	0.528729	0.0710185	0.558919	0.0722434
				0.483744	0.0639912	0.513307	0.0672961	0.543459	0.0706113	0.574211	0.0739368	0.605576	0.0772727	0.637566	0.0806188	0.670194	0.0839754	0.628434	0.079832	0.628434	0.0796885	0.628434	0.0799755			0.50237	0.0672918	0.512233	0.0675135	0.5124	0.068944	0.52895	0.0687424	0.514647	0.0689311	0.518	0.0698388	0.522523	0.0702722	0.525798	0.0701837	0.560266	0.0721444
				0.483784	0.0640155	0.513349	0.0673218	0.543504	0.0706383	0.574259	0.0739651	0.605627	0.0773023	0.637621	0.0806498	0.670251	0.0840077	0.636235	0.0806451	0.636235	0.0805001	0.636235	0.0807901			0.501002	0.0666526	0.5109	0.0669885	0.51102	0.068281	0.527612	0.0682104	0.513137	0.0682003	0.516544	0.0691049	0.521059	0.069541	0.524346	0.0694854	0.562452	0.0721498
				ConcTikEll	ConcTikEll	ConcTikEll	ConcTikEll	ConcTikEll	ConcTikEll	ConcTikEll	ConcTikEll	ConcTikEll	ConcTikEll	ConcTikEll	ConcTikEll	ConcTikEll	ConcTikEll	0.644073	0.0814588	0.644073	0.0813123	0.644073	0.0816054			0.501054	0.0661613	0.510943	0.0666212	0.511074	0.0677642	0.527655	0.0678326	0.513196	0.0676246	0.516602	0.0685139	0.521117	0.0689551	0.524403	0.0689371	0.565417	0.0722596
																		0.651948	0.0822732	0.651948	0.0821251	0.651948	0.0824212			0.502527	0.0658274	0.512362	0.0664186	0.512562	0.0674034	0.529079	0.0676164	0.514823	0.0672153	0.518173	0.0680773	0.522697	0.0685258	0.525966	0.0685495	0.56908	0.0724707
																		0.659861	0.0830881	0.659861	0.0829385	0.659861	0.0832377			0.50539	0.0656575	0.515129	0.0663848	0.515454	0.0672059	0.531856	0.067566	0.517986	0.0669803	0.521227	0.0678035	0.525767	0.0682616	0.529006	0.0683302	0.573342	0.0727774
																		0.667813	0.0839037	0.667813	0.0837526	0.667813	0.0840548			0.509589	0.0656548	0.519191	0.0665204	0.519694	0.0671754	0.535931	0.0676823	0.522624	0.0669243	0.525704	0.0676979	0.530268	0.0681675	0.533463	0.0682835	0.578087	0.0731714
																		0.675802	0.0847199	0.675802	0.0845672	0.675802	0.0848725			0.515042	0.0658194	0.524468	0.0668228	0.5252	0.0673125	0.541226	0.0679631	0.528646	0.0670482	0.531517	0.0677626	0.536113	0.0682454	0.539251	0.0684102	0.583184	0.0736417
																		0.683829	0.0855367	0.683829	0.0853825	0.683829	0.0856909			0.521641	0.0661481	0.530858	0.067286	0.531864	0.0676146	0.547638	0.0684029	0.535935	0.0673497	0.538554	0.0679962	0.543188	0.0684938	0.546256	0.0687078	0.588494	0.0741757
																		0.691895	0.0863541	0.691895	0.0861984	0.691895	0.0865098			0.52926	0.0666344	0.538236	0.0679011	0.539557	0.0680758	0.555041	0.0689932	0.544349	0.0678229	0.546676	0.0683943	0.551354	0.0689079	0.554343	0.0691707	0.593874	0.0747588
																		0.7	0.0871721	0.7	0.0870149	0.7	0.0873294			0.537749	0.0672691	0.546459	0.0686561	0.548129	0.068687	0.563292	0.0697225	0.553725	0.0684586	0.555726	0.0689491	0.560454	0.0694796	0.563354	0.0697897	0.599176	0.075375
																		0.7	0.0871721	0.7	0.0870149	0.7	0.0873294			0.546944	0.0680395	0.555366	0.0695363	0.557412	0.0694365	0.57223	0.0705766	0.563879	0.0692445	0.565528	0.0696497	0.570309	0.0701977	0.573114	0.0705529	0.604256	0.0760076
																		IsoLine	IsoLine	ConcBand	ConcBand	ConcBand	ConcBand			0.556665	0.0689309	0.564785	0.0705245	0.567227	0.0703096	0.581681	0.0715388	0.574615	0.0701651	0.57589	0.0704826	0.580729	0.0710483	0.583432	0.0714453	0.608974	0.0766392
																										0.566724	0.0699258	0.574531	0.0716016	0.577383	0.0712893	0.591461	0.0725904	0.585724	0.0712027	0.586612	0.0714315	0.591509	0.0720148	0.594109	0.0724496	0.613203	0.0772528
																										0.576924	0.0710049	0.584416	0.0727465	0.587681	0.0723565	0.601379	0.0737111	0.596988	0.072337	0.597485	0.0724781	0.602441	0.0730785	0.604936	0.0735463	0.616827	0.0778314
																										0.587067	0.0721471	0.594247	0.0739371	0.597921	0.0734906	0.611244	0.0748788	0.60819	0.073546	0.608296	0.0736018	0.613312	0.0742186	0.615702	0.074714	0.619746	0.0783595
																										0.596956	0.0733303	0.603832	0.07515	0.607904	0.0746693	0.620862	0.076071	0.61911	0.074806	0.618837	0.0747808	0.62391	0.0754129	0.626197	0.07593	0.621883	0.0788224
																										0.606397	0.0745313	0.612986	0.0763617	0.617436	0.0758699	0.630046	0.0772644	0.629537	0.0760926	0.6289	0.0759922	0.634029	0.0766381	0.636219	0.0771706	0.623177	0.0792077
																										0.615208	0.0757269	0.621529	0.0775486	0.626331	0.0770688	0.638618	0.0784358	0.639267	0.0773808	0.638291	0.0772125	0.643471	0.0778705	0.645571	0.0784116	0.623594	0.0795048
																										0.623217	0.0768938	0.629295	0.0786877	0.634416	0.0782428	0.646411	0.0795623	0.648111	0.0786454	0.646826	0.0784177	0.652054	0.0790861	0.654071	0.079629
																										0.630267	0.0780091	0.636134	0.0797567	0.641534	0.079369	0.653273	0.0806222	0.655897	0.0798619	0.654341	0.0795846	0.659609	0.0802611	0.661554	0.080799
																										0.636223	0.0790514	0.641912	0.0807348	0.647545	0.0804255	0.659071	0.0815946	0.662473	0.0810066	0.660687	0.0806904	0.665991	0.0813728	0.667875	0.0818988
																										0.640967	0.0800001	0.646517	0.081603	0.652334	0.0813917	0.663691	0.0824608	0.667712	0.0820571	0.665743	0.0817135	0.671074	0.0823994	0.67291	0.0829071
																										0.644407	0.080837	0.649859	0.0823445	0.655806	0.0822488	0.667045	0.0832038	0.671511	0.0829931	0.669408	0.082634	0.67476	0.083321	0.676561	0.0838041
																										0.646477	0.0815456	0.651873	0.0829446	0.657895	0.0829802	0.669066	0.0838092	0.673796	0.0837963	0.671613	0.0834341	0.676977	0.0841197	0.678758	0.0845726
																										0.647136	0.0821122	0.65252	0.0833919	0.658559	0.0835716	0.669715	0.0842652	0.674523	0.0844512	0.672314	0.0840981	0.677682	0.0847799	0.679457	0.0851974
																										Black	Black	Black	Black	Black	Black	Black	Black	Black	Black	Black	Black	Black	Black	Black	Black

## Sheet: PlotDat8
Source sheet	all data	0.600564	0.0774025	0.513349	0.0673218	0.543504	0.0706383	0.574259	0.0739651	0.605627	0.0773023	0.637621	0.0806498	0.670251	0.0840077	0.703532	0.087376	0.500457	0.066	0.501515	0.066	0.5	0.0660666	0.482812	0.0640155	0.674995	0.0851757	0.69525	0.0851793	0.688862	0.0862278	0.694015	0.0870985	0.678683	0.0865478	0.689149	0.0869942	0.648899	0.0821586
Plot name	Concordia2	0.610768	0.0776514	0.513307	0.0673474	0.543459	0.0706652	0.574211	0.0739934	0.605576	0.0773318	0.637566	0.0806807	0.670194	0.08404	0.703471	0.0874097	0.500457	0.066	0.507539	0.0666716	0.500457	0.0661179	0.512308	0.0673218	0.674216	0.08562	0.69485	0.0855985	0.688117	0.0865021	0.693201	0.0874261	0.677918	0.0869392	0.688361	0.0873726	0.64835	0.0823742
Plot Type	1	0.616506	0.0778807	0.513184	0.067371	0.543327	0.07069	0.574071	0.0740194	0.605427	0.077359	0.637408	0.0807091	0.670025	0.0840696	0.703293	0.0874405	0.507539	0.0667909	0.514654	0.0674616	0.507539	0.0669103	0.542391	0.0706383	0.672004	0.0859043	0.693732	0.0859498	0.685978	0.0866086	0.690868	0.0875721	0.675744	0.0871663	0.686115	0.0875805	0.64678	0.0824697
1st free col	41	0.615196	0.0780958	0.51299	0.0673906	0.54312	0.0707106	0.57385	0.0740409	0.605192	0.0773816	0.637158	0.0807327	0.66976	0.0840942	0.703012	0.0874662	0.514654	0.0675824	0.521803	0.0682523	0.514654	0.0677033	0.573073	0.0739651	0.668401	0.0860232	0.691906	0.0862303	0.682487	0.0865452	0.687062	0.0875336	0.672201	0.0872244	0.682454	0.0876139	0.64423	0.0824424
Sigma Level	2	0.605455	0.0784897	0.512741	0.0674046	0.542853	0.0707253	0.573566	0.0740564	0.604889	0.0773978	0.636837	0.0807496	0.66942	0.0841119	0.702651	0.0874846	0.521803	0.0683746	0.528986	0.0690435	0.521803	0.0684968	0.604365	0.0773023	0.663478	0.0859743	0.689388	0.0864376	0.677711	0.0863132	0.681858	0.0873115	0.667359	0.0871126	0.67745	0.0874721	0.640771	0.0822932
Absolute Errs	FALSE	0.613434	0.0786129	0.512456	0.0674119	0.54255	0.070733	0.573242	0.0740644	0.604545	0.0774062	0.63647	0.0807584	0.669031	0.084121	0.70224	0.0874941	0.528986	0.0691672	0.536203	0.0698353	0.528986	0.069291	0.636279	0.0806498	0.657331	0.0857586	0.686199	0.08657	0.671745	0.0859171	0.675356	0.0869099	0.661312	0.0868329	0.6712	0.0871578	0.636496	0.0820261
Symbol Type	1	IsoLine	IsoLine	0.51216	0.0674119	0.542233	0.070733	0.572904	0.0740644	0.604185	0.0774062	0.636089	0.0807584	0.668626	0.084121	0.701811	0.0874941	0.536203	0.0699605	0.543454	0.0706277	0.536203	0.0700857	0.668829	0.0840077	0.650078	0.0853802	0.682367	0.0866262	0.664703	0.0853645	0.667683	0.0863368	0.654178	0.0863908	0.663825	0.0866772	0.631523	0.0816484
Inverse Plot	FALSE			0.511876	0.0674046	0.541929	0.0707253	0.57258	0.0740564	0.603841	0.0773978	0.635722	0.0807496	0.668238	0.0841119	0.7014	0.0874846	0.543454	0.0707544	0.550738	0.0714207	0.543454	0.0708811	0.702025	0.087376	0.641862	0.0848465	0.677924	0.0866059	0.656723	0.0846663	0.658988	0.0856034	0.646096	0.0857949	0.65547	0.0860397	0.625987	0.0811704
Color Plot	FALSE			0.511626	0.0673906	0.541663	0.0707106	0.572296	0.0740409	0.603538	0.0773816	0.635401	0.0807327	0.667897	0.0840942	0.701039	0.0874662	0.550738	0.0715488	0.558058	0.0722143	0.550738	0.071677	IsoLine	IsoLine	0.632842	0.084168	0.672907	0.0865092	0.64796	0.083836	0.649442	0.0847237	0.637222	0.0850568	0.646296	0.0852576	0.620039	0.0806051
3D plot	FALSE			0.511432	0.067371	0.541455	0.07069	0.572075	0.0740194	0.603303	0.077359	0.635151	0.0807091	0.667632	0.0840696	0.700758	0.0874405	0.558058	0.0723439	0.565412	0.0730084	0.558058	0.0724735			0.623193	0.0833577	0.667361	0.086337	0.638585	0.0828897	0.639228	0.0837151	0.62773	0.084191	0.636483	0.0843462	0.613841	0.079968
Linear	FALSE			0.511309	0.0673474	0.541324	0.0706652	0.571935	0.0739934	0.603154	0.0773318	0.634993	0.0806807	0.667464	0.08404	0.70058	0.0874097	0.565412	0.0731395	0.5728	0.0738032	0.565412	0.0732706			0.613104	0.0824316	0.661332	0.0860906	0.628781	0.081846	0.628547	0.0825971	0.617805	0.0832141	0.626221	0.0833232	0.607562	0.0792764
Data Range	AC16:AG23			0.511267	0.0673218	0.541279	0.0706383	0.571887	0.0739651	0.603103	0.0773023	0.634938	0.0806498	0.667406	0.0840077	0.700519	0.087376	0.5728	0.0739358	0.580224	0.0745985	0.5728	0.0740683			0.602771	0.0814076	0.654871	0.0857722	0.618737	0.0807251	0.617606	0.0813915	0.60764	0.0821453	0.615711	0.0822085	0.601374	0.0785492
Filled Symbols	FALSE			0.511309	0.0672961	0.541324	0.0706113	0.571935	0.0739368	0.603154	0.0772727	0.634993	0.0806188	0.667464	0.0839754	0.70058	0.0873424	0.580224	0.0747326	0.587682	0.0753945	0.580224	0.0748666			0.592395	0.0803056	0.648035	0.0853845	0.60865	0.0795489	0.606618	0.0801217	0.597431	0.0810053	0.605156	0.0810238	0.595445	0.0778062
ConcAge	TRUE			0.511432	0.0672725	0.541455	0.0705865	0.572075	0.0739108	0.603303	0.0772455	0.635151	0.0805904	0.667632	0.0839458	0.700758	0.0873116	0.587682	0.07553	0.595176	0.076191	0.587682	0.0756655			0.582179	0.0791471	0.64088	0.0849309	0.598716	0.0783401	0.595797	0.0788126	0.58738	0.0798164	0.594762	0.0797922	0.589938	0.0770677
ConcSwap	FALSE			0.511626	0.067253	0.541663	0.070566	0.572296	0.0738893	0.603538	0.0772229	0.635401	0.0805668	0.667897	0.0839212	0.701039	0.0872859	0.595176	0.076328	0.602705	0.0769881	0.595176	0.076465			0.572319	0.0779546	0.633468	0.0844152	0.589128	0.0771225	0.585353	0.0774894	0.577679	0.0786017	0.584731	0.0785376	0.585001	0.0763539
1st Symbol-row	1			0.511876	0.0672389	0.541929	0.0705512	0.57258	0.0738738	0.603841	0.0772067	0.635722	0.0805499	0.668238	0.0839035	0.7014	0.0872675	0.602705	0.0771266	0.610269	0.0777858	0.602705	0.0772651			0.56301	0.0767515	0.625863	0.0838417	0.580073	0.0759195	0.575491	0.0761781	0.56852	0.0773848	0.575259	0.0772845	0.580771	0.0756842
				0.51216	0.0672316	0.542233	0.0705436	0.572904	0.0738658	0.604185	0.0771983	0.636089	0.0805411	0.668626	0.0838944	0.701811	0.087258	0.610269	0.0779258	0.61787	0.0785841	0.610269	0.0780657			0.554432	0.0755609	0.618129	0.0832155	0.571727	0.0747548	0.566401	0.074904	0.560079	0.0761893	0.566531	0.0760573	0.577362	0.0750768
				0.512456	0.0672316	0.54255	0.0705436	0.573242	0.0738658	0.604545	0.0771983	0.63647	0.0805411	0.669031	0.0838944	0.70224	0.087258	0.61787	0.0787255	0.625506	0.079383	0.61787	0.078867			0.546751	0.0744063	0.610332	0.0825417	0.564253	0.0736509	0.558261	0.0736922	0.552522	0.0750387	0.558715	0.0748798	0.574868	0.0745484
				0.512741	0.0672389	0.542853	0.0705512	0.573566	0.0738738	0.604889	0.0772067	0.636837	0.0805499	0.66942	0.0839035	0.702651	0.0872675	0.625506	0.0795259	0.633178	0.0801824	0.625506	0.0796689			0.540118	0.0733099	0.602539	0.0818263	0.557796	0.0726293	0.551229	0.072566	0.545995	0.0739552	0.551964	0.073775	0.573356	0.0741134
				0.51299	0.067253	0.54312	0.070566	0.57385	0.0738893	0.605192	0.0772229	0.637158	0.0805668	0.66976	0.0839212	0.703012	0.0872859	0.633178	0.0803269	0.640886	0.0809825	0.633178	0.0804713			0.534662	0.0722932	0.594816	0.0810752	0.552481	0.0717099	0.545442	0.0715474	0.540625	0.07296	0.546409	0.0727643	0.572867	0.0737836
				0.513184	0.0672725	0.543327	0.0705865	0.574071	0.0739108	0.605427	0.0772455	0.637408	0.0805904	0.670025	0.0839458	0.703293	0.0873116	0.640886	0.0811284	0.648631	0.0817832	0.640886	0.0812744			0.530488	0.071376	0.587229	0.0802949	0.548413	0.0709107	0.541013	0.0706563	0.536517	0.0720724	0.54216	0.0718675	0.573416	0.073568
				0.513307	0.0672961	0.543459	0.0706113	0.574211	0.0739368	0.605576	0.0772727	0.637566	0.0806188	0.670194	0.0839754	0.703471	0.0873424	0.648631	0.0819306	0.656412	0.0825844	0.648631	0.082078			0.527678	0.070576	0.579843	0.0794921	0.54567	0.0702471	0.538027	0.06991	0.533751	0.0713097	0.539297	0.0711019	0.574986	0.0734725
				0.513349	0.0673218	0.543504	0.0706383	0.574259	0.0739651	0.605627	0.0773023	0.637621	0.0806498	0.670251	0.0840077	0.703532	0.087376	0.656412	0.0827333	0.664231	0.0833863	0.656412	0.0828823			0.526286	0.069909	0.57272	0.0786735	0.544306	0.0697321	0.536544	0.0693231	0.53238	0.0706868	0.537878	0.0704826	0.577536	0.0734998
				ConcTikEll	ConcTikEll	ConcTikEll	ConcTikEll	ConcTikEll	ConcTikEll	ConcTikEll	ConcTikEll	ConcTikEll	ConcTikEll	ConcTikEll	ConcTikEll	ConcTikEll	ConcTikEll	0.664231	0.0835367	0.672085	0.0841887	0.664231	0.0836871			0.526341	0.0693877	0.565923	0.0778463	0.544347	0.0693756	0.536592	0.0689068	0.532432	0.0702157	0.537929	0.0700215	0.580995	0.073649
																		0.672085	0.0843406	0.679978	0.0849917	0.672085	0.0844926			0.52784	0.0690225	0.559508	0.0770173	0.545793	0.0691848	0.538169	0.0686695	0.533905	0.0699057	0.539449	0.0697276	0.58527	0.073916
																		0.679978	0.0851452	0.687907	0.0857954	0.679978	0.0852986			0.530755	0.0688204	0.55353	0.0761938	0.548615	0.0691631	0.541246	0.0686156	0.536771	0.0697628	0.54241	0.0696067	0.590243	0.0742938
																		0.687907	0.0859503	0.695874	0.0865996	0.687907	0.0861053			0.535028	0.0687853	0.548041	0.0753827	0.552758	0.0693112	0.545762	0.0687462	0.540974	0.0697897	0.546753	0.0696611	0.595779	0.0747718
																		0.695874	0.086756	0.703878	0.0874044	0.695874	0.0869125			0.540577	0.068918	0.543086	0.074591	0.558142	0.0696261	0.551629	0.0690588	0.546431	0.069986	0.552394	0.0698897	0.601728	0.0753371
																		0.703878	0.0875624	0.71192	0.0882098	0.703878	0.0877203			0.547293	0.0692158	0.53871	0.0738254	0.564663	0.0701016	0.558734	0.0695473	0.553038	0.0703477	0.559223	0.070288	0.607926	0.0759742
																		0.71192	0.0883693	0.72	0.0890158	0.71192	0.0885288			0.555047	0.0696729	0.534948	0.0730924	0.572192	0.0707285	0.566938	0.0702022	0.560665	0.070868	0.567107	0.0708485	0.614204	0.0766658
																		0.72	0.0891768	0.72	0.0890158	0.72	0.0893378			0.563686	0.0702805	0.531833	0.0723983	0.580584	0.0714946	0.576081	0.0710107	0.569163	0.0715366	0.575893	0.07156	0.620392	0.077393
																		0.72	0.0891768	ConcBand	ConcBand	0.72	0.0893378			0.573043	0.0710267	0.529391	0.0717491	0.589675	0.0723851	0.585985	0.0719571	0.578368	0.0723405	0.58541	0.0724089	0.626321	0.078136
																		IsoLine	IsoLine			ConcBand	ConcBand			0.582936	0.071897	0.527643	0.0711501	0.599288	0.0733825	0.596458	0.073023	0.588101	0.0732641	0.595472	0.0733784	0.631829	0.0788745
																										0.593172	0.0728745	0.526605	0.0706067	0.609236	0.0744674	0.607296	0.0741877	0.59817	0.0742895	0.605883	0.0744499	0.636765	0.0795883
																										0.603551	0.0739401	0.526285	0.0701234	0.619326	0.0756188	0.618287	0.0754284	0.608382	0.0753965	0.616442	0.0756024	0.640995	0.080258
																										0.613873	0.0750731	0.526686	0.0697042	0.629361	0.0768142	0.629218	0.076721	0.618537	0.0765638	0.626942	0.0768135	0.644404	0.0808654
																										0.623935	0.0762514	0.527804	0.0693529	0.639146	0.0780304	0.639876	0.0780404	0.628437	0.0777686	0.637179	0.0780596	0.646898	0.0813938
																										0.633543	0.0774521	0.529629	0.0690724	0.64849	0.0792436	0.650054	0.0793608	0.63789	0.0789874	0.646954	0.0793165	0.648411	0.0818288
																										0.642509	0.0786519	0.532147	0.0688651	0.657212	0.0804303	0.659553	0.0806567	0.646712	0.0801965	0.656077	0.0805597	0.648899	0.0821586
																										0.650658	0.0798274	0.535336	0.0687327	0.665141	0.0815674	0.668189	0.0819027	0.65473	0.0813724	0.664369	0.081765
																										0.657832	0.0809556	0.539168	0.0686765	0.672124	0.0826328	0.675794	0.0830746	0.66179	0.0824922	0.67167	0.0829089
																										0.663892	0.0820147	0.543612	0.0686968	0.678024	0.0836056	0.682219	0.0841496	0.667753	0.0835341	0.677838	0.0839693
																										0.668719	0.0829841	0.548628	0.0687935	0.682727	0.084467	0.687339	0.0851067	0.672503	0.0844778	0.682752	0.0849253
																										0.672219	0.0838447	0.554174	0.0689658	0.686141	0.0852003	0.691056	0.0859274	0.675948	0.0853049	0.686317	0.0857585
																										0.674325	0.0845801	0.560203	0.0692121	0.688199	0.085791	0.693296	0.0865957	0.678022	0.0859994	0.688463	0.0864527
																										0.674995	0.0851757	0.566664	0.0695305	0.688862	0.0862278	0.694015	0.0870985	0.678683	0.0865478	0.689149	0.0869942
																										Black	Black	0.573501	0.0699182	Black	Black	Black	Black	Black	Black	Black	Black
																												0.580655	0.0703718
																												0.588067	0.0708875
																												0.595672	0.071461
																												0.603406	0.0720872
																												0.611203	0.072761
																												0.618997	0.0734764
																												0.62672	0.0742275
																												0.634306	0.0750078
																												0.641693	0.0758106
																												0.648815	0.0766292
																												0.655612	0.0774565
																												0.662027	0.0782854
																												0.668005	0.0791089
																												0.673495	0.07992
																												0.678449	0.0807117
																												0.682826	0.0814773
																												0.686588	0.0822103
																												0.689703	0.0829044
																												0.692144	0.0835537
																												0.693892	0.0841526
																												0.69493	0.084696
																												0.69525	0.0851793
																												Black	Black

## Sheet: PlotDat9
Source sheet	all data	0.62173	0.0788985	0.543504	0.0706383	0.574259	0.0739651	0.605627	0.0773023	0.637621	0.0806498	0.670251	0.0840077	0.703532	0.087376	0.737476	0.0907549	0.52	0.068175	0.52	0.0680531	0.52	0.0682969	0.512308	0.0673218	0.694973	0.0872789	0.704721	0.086963	0.69883	0.087278	0.706322	0.087513	0.705459	0.087234	0.697083	0.0879095	0.709327	0.0879706	0.709182	0.0885184	0.708442	0.089284	0.657713	0.0828941
Plot name	Concordia5	0.62444	0.0789767	0.543459	0.0706652	0.574211	0.0739934	0.605576	0.0773318	0.637566	0.0806807	0.670194	0.08404	0.703471	0.0874097	0.737412	0.0907898	0.52	0.068175	0.52	0.0680531	0.52	0.0682969	0.542391	0.0706383	0.694217	0.0875798	0.703883	0.0874607	0.698057	0.0876321	0.705501	0.0879389	0.704653	0.0876775	0.696274	0.0883155	0.708497	0.0884297	0.708367	0.0889346	0.707374	0.0895519	0.657259	0.0830685
Plot Type	1	0.624335	0.0790456	0.543327	0.07069	0.574071	0.0740194	0.605427	0.077359	0.637408	0.0807091	0.670025	0.0840696	0.703293	0.0874405	0.737223	0.090822	0.527102	0.0689596	0.527102	0.0688362	0.527102	0.0690829	0.573073	0.0739651	0.692049	0.0877118	0.701498	0.0877932	0.695849	0.0878191	0.703159	0.0881941	0.702357	0.0879572	0.693968	0.0885483	0.706136	0.0887198	0.706045	0.0891792	0.70429	0.0895704	0.655958	0.0831436
1st free col	47	0.627411	0.0791683	0.54312	0.0707106	0.57385	0.0740409	0.605192	0.0773816	0.637158	0.0807327	0.66976	0.0840942	0.703012	0.0874662	0.736926	0.0908486	0.534236	0.0697447	0.534236	0.0696199	0.534236	0.0698695	0.604365	0.0773023	0.688513	0.0876722	0.697613	0.0879542	0.692249	0.0878354	0.699343	0.0882737	0.698616	0.0880675	0.69021	0.0886034	0.702289	0.0888353	0.70226	0.0892477	0.699275	0.089339	0.653846	0.0831174
Sigma Level	2	0.628128	0.0792573	0.542853	0.0707253	0.573566	0.0740564	0.604889	0.0773978	0.636837	0.0807496	0.66942	0.0841119	0.702651	0.0874846	0.736545	0.0908677	0.541404	0.0705304	0.541404	0.0704041	0.541404	0.0706566	0.636279	0.0806498	0.683677	0.0874618	0.692304	0.0879404	0.687328	0.0876806	0.694127	0.088176	0.693504	0.0880064	0.685073	0.0884797	0.69703	0.0887739	0.697087	0.0891385	0.692465	0.088864	0.65098	0.0829905
Absolute Errs	FALSE	0.619379	0.0794181	0.54255	0.070733	0.573242	0.0740644	0.604545	0.0774062	0.63647	0.0807584	0.669031	0.084121	0.70224	0.0874941	0.736109	0.0908777	0.548606	0.0713166	0.548606	0.0711889	0.548606	0.0714443	0.668829	0.0840077	0.677635	0.0870848	0.685675	0.0877521	0.68118	0.0873577	0.687613	0.087903	0.687119	0.0877749	0.678658	0.0881796	0.690464	0.0885369	0.690626	0.0888539	0.684047	0.0881583	0.647438	0.0827666
Symbol Type	1	0.6298	0.0797491	0.542233	0.070733	0.572904	0.0740644	0.604185	0.0774062	0.636089	0.0807584	0.668626	0.084121	0.701811	0.0874941	0.735656	0.0908777	0.555841	0.0721035	0.555841	0.0719743	0.555841	0.0722326	0.702025	0.087376	0.670506	0.0865484	0.677853	0.0873931	0.673926	0.086873	0.679927	0.08746	0.679586	0.0873777	0.671088	0.087709	0.682716	0.0881289	0.683003	0.0883994	0.67425	0.0872413	0.643318	0.0824516
Inverse Plot	FALSE	0.63092	0.0801246	0.541929	0.0707253	0.57258	0.0740564	0.603841	0.0773978	0.635722	0.0807496	0.668238	0.0841119	0.7014	0.0874846	0.735221	0.0908677	0.56311	0.0728909	0.56311	0.0727602	0.56311	0.0730215	0.735883	0.0907549	0.662426	0.0858631	0.668992	0.0868702	0.665706	0.086236	0.671218	0.0868555	0.671051	0.0868224	0.662513	0.0870771	0.673939	0.0875577	0.674366	0.0877839	0.66334	0.0861379	0.638731	0.0820541
Color Plot	FALSE	0.633488	0.0804087	0.541663	0.0707106	0.572296	0.0740409	0.603538	0.0773816	0.635401	0.0807327	0.667897	0.0840942	0.701039	0.0874662	0.734839	0.0908486	0.570413	0.0736789	0.570413	0.0735468	0.570413	0.073811	IsoLine	IsoLine	0.653555	0.0850423	0.659263	0.0861937	0.656682	0.085459	0.661657	0.0861015	0.661681	0.0861198	0.653098	0.086296	0.664302	0.0868346	0.664883	0.0870192	0.651617	0.0848782	0.633802	0.0815851
3D plot	FALSE	IsoLine	IsoLine	0.541455	0.07069	0.572075	0.0740194	0.603303	0.077359	0.635151	0.0807091	0.667632	0.0840696	0.700758	0.0874405	0.734542	0.090822	0.57775	0.0744674	0.57775	0.0743339	0.57775	0.074601			0.644064	0.0841019	0.648857	0.0853767	0.647028	0.0845572	0.65143	0.0852125	0.651657	0.0852837	0.643026	0.0853811	0.653994	0.0859735	0.65474	0.0861204	0.639399	0.0834966	0.628667	0.0810573
Linear	FALSE			0.541324	0.0706652	0.571935	0.0739934	0.603154	0.0773318	0.634993	0.0806807	0.667464	0.08404	0.70058	0.0874097	0.734354	0.0907898	0.585122	0.0752566	0.585122	0.0751216	0.585122	0.0753916			0.634139	0.0830602	0.637976	0.0844351	0.636932	0.0835481	0.640735	0.0842059	0.641176	0.0843303	0.632495	0.0843501	0.643215	0.0849913	0.644133	0.0851049	0.627019	0.0820307	0.623465	0.080485
Data Range	AC24:AG38			0.541279	0.0706383	0.571887	0.0739651	0.603103	0.0773023	0.634938	0.0806498	0.667406	0.0840077	0.700519	0.087376	0.734289	0.0907549	0.592527	0.0760463	0.592527	0.0759099	0.592527	0.0761828			0.623972	0.0819375	0.626831	0.0833873	0.626591	0.0824514	0.62978	0.0831012	0.630441	0.0832782	0.621708	0.0832231	0.632175	0.0839071	0.633268	0.0839924	0.614817	0.0805207	0.618337	0.079884
Filled Symbols	FALSE			0.541324	0.0706113	0.571935	0.0739368	0.603154	0.0772727	0.634993	0.0806188	0.667464	0.0839754	0.70058	0.0873424	0.734354	0.0907199	0.599968	0.0768366	0.599968	0.0766987	0.599968	0.0769746			0.613761	0.0807557	0.615639	0.0822537	0.616206	0.0812884	0.61878	0.08192	0.619661	0.0821478	0.610876	0.0820221	0.621088	0.0827419	0.622358	0.0828047	0.603123	0.0790075	0.613425	0.0792705
ConcAge	TRUE			0.541455	0.0705865	0.572075	0.0739108	0.603303	0.0772455	0.635151	0.0805904	0.667632	0.0839458	0.700758	0.0873116	0.734542	0.0906878	0.607443	0.0776275	0.607443	0.0774881	0.607443	0.077767			0.603705	0.0795377	0.604619	0.0810563	0.605979	0.0800817	0.607947	0.0806852	0.609045	0.0809611	0.600209	0.0807704	0.610172	0.0815185	0.611615	0.0815648	0.592258	0.0775326	0.608861	0.0786614
ConcSwap	FALSE			0.541663	0.070566	0.572296	0.0738893	0.603538	0.0772229	0.635401	0.0805668	0.667897	0.0839212	0.701039	0.0872859	0.734839	0.0906611	0.614953	0.078419	0.614953	0.0782781	0.614953	0.0785599			0.594001	0.0783072	0.593985	0.0798184	0.596109	0.0788549	0.597494	0.0794209	0.598801	0.0797413	0.589915	0.0794923	0.599637	0.0802607	0.601247	0.0802968	0.582517	0.0761362	0.604771	0.0780732
1st Symbol-row	1			0.541929	0.0705512	0.57258	0.0738738	0.603841	0.0772067	0.635722	0.0805499	0.668238	0.0839035	0.7014	0.0872675	0.735221	0.090642	0.622498	0.0792111	0.622498	0.0790687	0.622498	0.0793534			0.584835	0.0770883	0.583943	0.0785641	0.586789	0.0776318	0.587622	0.0781517	0.589128	0.078512	0.580195	0.0782129	0.589689	0.0789929	0.591457	0.0790255	0.574167	0.0748562	0.601265	0.0775221
				0.542233	0.0705436	0.572904	0.0738658	0.604185	0.0771983	0.636089	0.0805411	0.668626	0.0838944	0.701811	0.087258	0.735656	0.0906321	0.630079	0.0800037	0.630079	0.0798599	0.630079	0.0801476			0.576389	0.0759046	0.57469	0.0773178	0.5782	0.0764362	0.578525	0.0769022	0.580214	0.0772973	0.571238	0.0769568	0.580522	0.0777398	0.582435	0.0777756	0.567435	0.0737278	0.59844	0.0770229
				0.54255	0.0705436	0.573242	0.0738658	0.604545	0.0771983	0.63647	0.0805411	0.669031	0.0838944	0.70224	0.087258	0.736109	0.0906321	0.637695	0.0807969	0.637695	0.0806516	0.637695	0.0809423			0.568824	0.0747792	0.566405	0.0761038	0.570509	0.0752914	0.57038	0.0756969	0.572233	0.0761207	0.563217	0.0757487	0.572314	0.0765258	0.574357	0.0765714	0.562504	0.0727816	0.596373	0.0765894
				0.542853	0.0705512	0.573566	0.0738738	0.604889	0.0772067	0.636837	0.0805499	0.66942	0.0839035	0.702651	0.0872675	0.736545	0.090642	0.645346	0.0815907	0.645346	0.0814439	0.645346	0.0817375			0.562289	0.0737339	0.559249	0.0749458	0.563865	0.0742197	0.563345	0.0745591	0.565339	0.0750051	0.55629	0.074612	0.565225	0.0753745	0.56738	0.0754364	0.55951	0.0720434	0.595119	0.0762333
				0.54312	0.070566	0.57385	0.0738893	0.605192	0.0772229	0.637158	0.0805668	0.66976	0.0839212	0.703012	0.0872859	0.736926	0.0906611	0.653033	0.0823851	0.653033	0.0822368	0.653033	0.0825334			0.556912	0.0727892	0.553363	0.0738662	0.558399	0.0732419	0.557556	0.073511	0.559668	0.0739723	0.550591	0.0735688	0.559393	0.0743084	0.561639	0.0743926	0.558534	0.0715334	0.594714	0.0759644
				0.543327	0.0705865	0.574071	0.0739108	0.605427	0.0772455	0.637408	0.0805904	0.670025	0.0839458	0.703293	0.0873116	0.737223	0.0906878	0.660756	0.0831801	0.660756	0.0830303	0.660756	0.0833299			0.552796	0.0719634	0.54886	0.0728861	0.554215	0.072377	0.553128	0.0725731	0.555329	0.0730424	0.54623	0.0726395	0.554931	0.0733482	0.557247	0.0734604	0.559602	0.0712655	0.595168	0.0757901
				0.543459	0.0706113	0.574211	0.0739368	0.605576	0.0772727	0.637566	0.0806188	0.670194	0.0839754	0.703471	0.0873424	0.737412	0.0907199	0.668516	0.0839756	0.668516	0.0838244	0.668516	0.0841269			0.550021	0.0712726	0.545828	0.0720245	0.551397	0.071642	0.550145	0.0717635	0.552407	0.0722335	0.543294	0.0718422	0.551927	0.0725126	0.554289	0.0726579	0.562686	0.071247	0.596469	0.075715
				0.543504	0.0706383	0.574259	0.0739651	0.605627	0.0773023	0.637621	0.0806498	0.670251	0.0840077	0.703532	0.087376	0.737476	0.0907549	0.676311	0.0847718	0.676311	0.084619	0.676311	0.0849245			0.548642	0.0707302	0.544326	0.0712982	0.549998	0.071051	0.548666	0.0710981	0.550959	0.0715612	0.541838	0.0711922	0.550438	0.0718179	0.552823	0.0720008	0.567701	0.0714784	0.598581	0.0757412
				ConcTikEll	ConcTikEll	ConcTikEll	ConcTikEll	ConcTikEll	ConcTikEll	ConcTikEll	ConcTikEll	ConcTikEll	ConcTikEll	ConcTikEll	ConcTikEll	ConcTikEll	ConcTikEll	0.684143	0.0855685	0.684143	0.0854143	0.684143	0.0857227			0.548686	0.0703468	0.544383	0.0707214	0.550046	0.0706157	0.54872	0.0705897	0.551012	0.0710388	0.541891	0.0707024	0.550494	0.0712775	0.552876	0.0715017	0.574511	0.0719534	0.601447	0.075868
																		0.692011	0.0863658	0.692011	0.0862101	0.692011	0.0865215			0.550152	0.0701298	0.545999	0.0703053	0.55154	0.0703445	0.550305	0.0702483	0.552567	0.0706763	0.543453	0.0703823	0.552093	0.070902	0.554449	0.0711705	0.582929	0.0726591	0.604989	0.076092
																		0.699916	0.0871637	0.699916	0.0870065	0.699916	0.0873209			0.553011	0.0700835	0.549141	0.0700579	0.554451	0.0702426	0.553391	0.0700805	0.555593	0.0704808	0.546493	0.070238	0.555205	0.0706987	0.55751	0.0710136	0.592726	0.0735761	0.609109	0.076407
																		0.707859	0.0879622	0.707859	0.0878035	0.707859	0.0881209			0.557207	0.0702088	0.553749	0.0699842	0.558722	0.070312	0.557918	0.0700896	0.56003	0.0704562	0.550951	0.0702723	0.559769	0.0706715	0.562	0.071034	0.603636	0.0746795	0.613696	0.0768044
																		0.715838	0.0887613	0.715838	0.088601	0.715838	0.0889215			0.562659	0.0705032	0.559733	0.0700854	0.564271	0.0705515	0.563798	0.0702754	0.565793	0.0706029	0.556741	0.0704847	0.565696	0.0708211	0.567831	0.0712313	0.615359	0.0759392	0.618624	0.0772734
																		0.723854	0.0895609	0.723854	0.0893992	0.723854	0.0897226			0.569261	0.070961	0.566976	0.0703598	0.570988	0.0709562	0.570915	0.0706343	0.572769	0.070918	0.56375	0.070871	0.57287	0.0711444	0.57489	0.0716018	0.627577	0.0773208	0.62376	0.0778013
																		0.731908	0.0903611	0.731908	0.0901979	0.731908	0.0905244			0.576884	0.0715734	0.575338	0.0708018	0.578744	0.0715184	0.579133	0.0711593	0.580823	0.0713954	0.571842	0.0714236	0.581153	0.0716352	0.58304	0.0721381	0.639956	0.0787867	0.628962	0.0783735
																		0.74	0.091162	0.74	0.0909972	0.74	0.0913267			0.58538	0.0723282	0.584656	0.071403	0.587387	0.0722272	0.58829	0.0718402	0.589797	0.0720259	0.58086	0.0721319	0.590383	0.0722839	0.592122	0.0728299	0.652159	0.0802967	0.63409	0.0789746
																		0.74	0.091162	0.74	0.0909972	0.74	0.0913267			0.594584	0.073211	0.594747	0.0721515	0.596749	0.0730686	0.598208	0.0726637	0.599518	0.0727971	0.590627	0.0729819	0.600379	0.073078	0.601959	0.0736637	0.663853	0.0818099	0.639002	0.079588
																		IsoLine	IsoLine	ConcBand	ConcBand	ConcBand	ConcBand			0.604315	0.0742045	0.605417	0.073033	0.606648	0.0740264	0.608695	0.0736138	0.609795	0.073694	0.600953	0.0739572	0.610949	0.0740018	0.612359	0.0746232	0.674718	0.0832848	0.643566	0.0801971
																										0.614386	0.0752893	0.616457	0.0740301	0.616892	0.0750819	0.619546	0.074672	0.620429	0.0746992	0.611639	0.0750389	0.621885	0.0750376	0.623121	0.0756898	0.684459	0.0846812	0.647656	0.0807853
																										0.6246	0.0764444	0.627653	0.0751235	0.62728	0.0762145	0.63055	0.0758178	0.631213	0.0757932	0.622475	0.0762057	0.632975	0.076165	0.634035	0.0768427	0.692809	0.0859612	0.651162	0.0813365
																										0.634758	0.0776473	0.638786	0.0762918	0.637611	0.0774022	0.641494	0.0770287	0.641937	0.0769545	0.63325	0.0774351	0.644004	0.0773622	0.644888	0.0780595	0.699541	0.0870896	0.653987	0.0818357
																										0.644662	0.0788745	0.649639	0.0775125	0.647683	0.0786219	0.652163	0.0782813	0.652392	0.0781607	0.643756	0.078703	0.654756	0.0786059	0.655469	0.0793165	0.704472	0.0880358	0.656054	0.0822692
																										0.65412	0.0801021	0.660003	0.0787616	0.657302	0.0798499	0.66235	0.0795512	0.662375	0.0793883	0.653787	0.0799849	0.665022	0.0798718	0.665573	0.0805892	0.707466	0.088774	0.657307	0.0826252
																										0.662948	0.0813064	0.669674	0.0800149	0.666278	0.0810622	0.671857	0.0808136	0.671691	0.0806132	0.663149	0.0812558	0.674603	0.0811353	0.675002	0.0818529	0.708442	0.089284	0.657713	0.0828941
																										0.670973	0.0824638	0.678464	0.0812481	0.674438	0.0822353	0.6805	0.082044	0.68016	0.0818118	0.671659	0.0824909	0.683311	0.0823719	0.683573	0.0830829	Black	Black
																										0.67804	0.0835517	0.686203	0.082437	0.681623	0.0833462	0.688108	0.0832184	0.687615	0.0829607	0.679151	0.0836661	0.690978	0.0835574	0.691119	0.0842554
																										0.68401	0.0845491	0.69274	0.0835585	0.687693	0.0843735	0.694536	0.084314	0.693913	0.0840375	0.68548	0.0847587	0.697455	0.0846688	0.697493	0.0853474
																										0.688769	0.0854366	0.697948	0.0845909	0.69253	0.0852971	0.699657	0.0853094	0.698931	0.0850212	0.690522	0.0857474	0.702614	0.0856844	0.702572	0.0863378
																										0.692223	0.0861967	0.701725	0.085514	0.696039	0.086099	0.703372	0.0861853	0.70257	0.0858928	0.694179	0.0866128	0.706357	0.0865845	0.706256	0.0872073
																										0.694304	0.0868149	0.703997	0.0863099	0.698153	0.0867636	0.705608	0.0869246	0.70476	0.0866352	0.696381	0.0873382	0.708609	0.0873515	0.708474	0.0879389
																										0.694973	0.0872789	0.704721	0.086963	0.69883	0.087278	0.706322	0.087513	0.705459	0.087234	0.697083	0.0879095	0.709327	0.0879706	0.709182	0.0885184
																										Black	Black	Black	Black	Black	Black	Black	Black	Black	Black	Black	Black	Black	Black	Black	Black

## Sheet: data table
EC-PO-337	207Pb	Ua	Pba	Thc	206Pb	206Pbe	2 s	207Pbe	2 s	207Pbe	2 s	rho	206Pb	2 s	207Pb	2 s	207Pb	2 s
Spot number	(cps)	(ppm)	(ppm)	U	204Pb	238U	%	235U	%	206Pb	%		238U	(Ma)	235U	(Ma)	206Pb	(Ma)	conc %
A-4	117120	921.907	239.996	0.0883787	0	0.2338	9.24626	6.541	9.89706	0.203	3.5	0.934243	1354.52	112.96	2051.5	87.1677	2849.66	57.4865	47.5327
A-5	8858.6	311.855	25.7995	0.385309	0	0.08382	9.06711	0.6665	10.3516	0.05769	5	0.875913	518.866	45.2026	518.58	42.037	517.321	109.655	100.299
A-6	6450.87	424.052	30.5076	0.335674	0	0.07265	9.52555	0.6156	10.1883	0.06148	3.6	0.934951	452.079	41.5877	487.117	39.4201	655.501	77.5382	68.967
A-7	15289.8	753.506	75.9566	1.1608	0	0.1017	9.43449	0.873	10.2661	0.06226	4	0.918996	624.479	56.1527	637.205	48.5866	682.601	86.4397	91.4852
A-8	3433.55	215.811	15.4161	0.526186	0	0.07166	9.57181	0.6811	11.2144	0.06896	5.8	0.853525	446.156	41.2609	527.468	46.1364	896.876	120.572	49.7455
A-9	3603.64	142.433	6.27218	0.503173	0	0.04191	11.6911	0.756	12.7391	0.1309	5.1	0.917735	264.682	30.3176	571.723	55.6901	2109.07	88.7715	12.5497
A-10	6795.22	479.82	35.1146	0.20025	0	0.07425	9.4802	0.574	10.4121	0.05608	4.3	0.910501	461.71	42.2403	460.594	38.5541	455.03	95.5479	101.468
A-11	10877.7	695.656	47.5639	0.307186	0.208473	0.06904	9.08497	0.5856	10.2027	0.06154	4.6	0.890448	430.355	37.8211	468.056	38.2608	657.465	99.5693	65.4567
A-12	9055.38	460.174	38.3149	0.402127	0.155807	0.08339	9.4397	0.8147	9.99149	0.07088	3.3	0.944774	516.31	46.8374	605.102	45.5471	953.421	66.9749	54.1534
A-13	4681.58	283.367	22.44	0.200092	0.237481	0.08023	9.17079	0.6388	9.50712	0.05777	2.5	0.964624	497.474	43.9063	501.568	37.6289	520.291	55.0015	95.6145
A-14	6834.37	413.378	31.8275	0.416509	0.0917742	0.07757	9.1527	0.6857	10.0921	0.06413	4.3	0.906913	481.579	42.4713	530.186	41.6821	745.288	89.8802	64.6165
A-15	7409.82	367.737	33.4395	0.550293	0.0186593	0.09156	9.20975	0.8166	9.74847	0.0647	3.2	0.944738	564.776	49.801	606.165	44.4964	764.098	67.3489	73.914
A-16	7606.58	502.123	40.5359	0.146534	0.101065	0.08184	9.18279	0.6427	9.64317	0.05697	2.9	0.952259	507.11	44.7824	503.975	38.3088	489.766	64.9434	103.541
A-17	54300.6	664.249	49.8275	0.919626	16.0109	0.07279	9.38826	1.081	11.618	0.1077	6.8	0.808078	452.943	41.0639	744.152	61.2812	1761.12	125.112	25.7189
A-18	10198.4	489.069	44.5285	0.936405	0.0273872	0.09174	9.33091	0.8078	9.88045	0.06388	3.2	0.944381	565.847	50.5477	601.223	44.8293	736.981	68.7757	76.779
A-19	12282.8	678.465	40.6544	1.42062	0.0482516	0.0582	9.69771	0.8548	12.9424	0.1065	8.6	0.749298	364.697	34.3854	627.255	60.5619	1740.5	157.086	20.9536
A-20	15132.3	952.38	79.2021	0.766755	0.041667	0.08426	9.24013	0.6697	9.70625	0.05766	3	0.951978	521.486	46.2885	520.543	39.5304	516.408	65.2573	100.983
A-21	4644.25	299.027	24.5531	0.165979	0.0788465	0.08314	9.2143	0.6692	9.86822	0.0584	3.5	0.933735	514.823	45.5925	520.252	40.1729	544.16	77.2051	94.6088
A-22	5166.64	341.785	27.0643	0.262404	0.0522397	0.0802	9.32123	0.6419	9.98707	0.05807	3.6	0.933329	497.316	44.613	503.481	39.645	531.592	78.5331	93.5524
A-23	6720.53	432.245	33.6454	0.0744563	0.111621	0.0789	9.13357	0.6217	9.62578	0.05717	3	0.948865	489.545	43.0573	490.931	37.4705	497.404	66.9449	98.4198
A-24	10024.9	485.824	48.6805	0.537809	0.115415	0.1012	9.1987	0.8582	9.83328	0.06153	3.5	0.935466	621.301	54.4838	629.126	46.1124	657.358	74.5266	94.5148
A-25	4835.05	0.0865695	0.0641618	3.61521	30.894	0.7453	9.50877	6.804	46.574	0.06623	46	0.204164	3590.16	261.759	2086.29	412.31	813.196	953.293	441.487
A-26	7076.87	508.725	39.4192	0.280299	0.0274049	0.07839	9.17632	0.6409	10.037	0.05931	4.1	0.914253	486.524	43.0018	502.873	39.8058	577.967	88.3678	84.1785
A-27	5882.93	427.077	33.0358	0.167619	0.111365	0.07849	9.09507	0.6055	9.88236	0.05596	3.9	0.920334	487.102	42.6698	480.69	37.842	450.222	85.852	108.192
A-28	6778.91	327.264	17.2773	0.409926	3.18377	0.05227	10.2771	0.6062	11.9877	0.08413	6.2	0.857309	328.441	32.9089	481.134	45.9369	1295.04	120.015	25.3615
A-29	3732.19	238.854	19.3903	0.237534	0	0.08217	9.46678	0.6661	10.5704	0.05881	4.7	0.895593	509.04	46.3361	518.35	42.9109	559.601	102.508	90.9647
A-30	4371.05	248.684	23.3077	0.241656	0	0.09489	9.4885	0.7645	12.3001	0.05844	7.8	0.771413	584.412	53.0127	576.582	54.1108	545.841	171.016	107.066
A-31	5631.12	367.1	28.1203	0.271756	0	0.07765	9.44594	0.6108	11.3021	0.05706	6.2	0.835766	482.089	43.8767	484.044	43.5144	493.314	136.816	97.7244
A-32	6052.01	395.48	33.0275	0.25743	0.128009	0.08418	9.28024	0.7362	10.395	0.06345	4.7	0.892757	521.047	46.4518	560.203	44.7571	722.628	99.3639	72.1045
A-33	7896.9	524.789	40.3312	0.0929715	0.092728	0.07788	9.1583	0.6165	9.58968	0.05743	2.8	0.955017	483.46	42.6572	487.655	37.1359	507.415	62.5449	95.2791
A-34	25645.4	309.146	52.9023	0.358598	1.41412	0.1622	9.41622	3.034	9.81747	0.1357	2.8	0.959128	969.144	84.7282	1416.26	74.9749	2172.37	48.3969	44.6123
A-35	4843.82	316.917	24.818	0.319687	0.0355137	0.07942	9.45352	0.6194	10.2507	0.05658	4	0.922228	492.648	44.8375	489.458	39.8101	474.555	87.6613	103.813
A-36	4267.47	280.242	21.0483	0.22815	0	0.07617	9.92298	0.5937	11.1161	0.05655	5	0.892665	473.232	45.2765	473.257	42.0499	473.383	110.837	99.968
A-37	2996.16	195.935	14.941	0.52896	0.411664	0.07727	9.37156	0.6124	10.6926	0.05749	5.1	0.876449	479.813	43.3333	485.044	41.2342	509.841	113.183	94.1103
A-38	5124.97	338.5	27.4951	0.879679	0.253955	0.08237	9.18555	0.6427	10.1644	0.0566	4.4	0.903695	510.271	45.0641	503.979	40.3799	475.519	96.2436	107.308
A-39	6675.82	388.251	24.8466	0.397461	0.0439097	0.06423	9.47715	0.6061	10.3039	0.06847	4	0.919759	401.287	36.8711	481.125	39.4843	882.098	83.6407	45.4924
A-40	19851.5	801.162	58.3794	1.31469	0	0.071	9.5385	1.007	10.1139	0.1029	3.4	0.943109	442.178	40.7631	707.286	51.5229	1676.2	62.1335	26.3798
A-41	8012.91	458.46	28.8355	0.751649	0.0203053	0.06295	9.65627	0.6213	10.7233	0.0716	4.7	0.900495	393.553	36.8658	490.67	41.7255	974.058	95.0784	40.4035
A-42	1725.12	112.357	9.1778	0.648079	0	0.08277	9.4045	0.6558	11.9126	0.05748	7.3	0.78946	512.657	46.3456	512.038	47.9068	509.277	160.761	100.664
A-43	5393.79	336.342	29.1232	0.0808949	0	0.08777	9.47629	0.691	11.0208	0.05712	5.6	0.859856	542.34	49.2912	533.425	45.729	495.475	123.998	109.459
A-44	3745.26	235.751	19.9867	0.207796	0.256276	0.08596	9.21111	0.6735	10.248	0.05684	4.5	0.898818	531.588	47.0006	522.813	41.8761	484.665	99.1781	109.682
A-45	11578.4	764.752	58.2105	0.142066	0	0.07719	9.43697	0.6018	10.5406	0.05656	4.7	0.895298	479.356	43.5956	478.389	40.2113	473.757	103.867	101.182
A-46	8749.46	0.686769	0.100124	0.464965	0.172059	0.1458	9.07594	1.452	9.74967	0.07222	3.6	0.930897	877.606	74.4671	910.612	58.6192	991.514	72.4193	88.5116
A-47	5919.52	368.879	29.8599	0.0868328	0	0.08189	9.53488	0.6706	10.223	0.05941	3.7	0.932686	507.382	46.5234	521.069	41.6673	581.52	80.0821	87.2511
A-48	6748.05	394.976	27.8993	0.474507	0.0191989	0.07058	9.67724	0.7153	10.5112	0.07352	4.1	0.92066	439.649	41.1275	547.871	44.5061	1027.77	82.9785	42.7769
A-49	15848.5	780.24	65.3628	1.16003	0.0325426	0.08361	9.70746	0.8631	10.204	0.07489	3.1	0.951342	517.619	48.2833	631.791	47.9968	1064.95	63.2297	48.605
A-50	4530.83	227.808	23.8378	0.625217	0	0.1059	10.0812	0.8557	11.5712	0.05861	5.7	0.871238	649.067	62.2477	627.795	54.1791	551.889	123.974	117.608
A-51	7633.6	331.043	26.0772	0.371267	0.230439	0.07808	9.13462	0.8907	11.6745	0.08276	7.3	0.782439	484.679	42.6502	646.757	55.845	1262.91	142.029	38.378
A-52	4653.29	288.553	23.4907	0.257936	0.0694408	0.08244	9.32631	0.6621	9.93334	0.05827	3.4	0.938889	510.65	45.7874	515.926	40.18	539.362	74.7911	94.6768
A-53	5832.37	367.567	22.7614	0.78862	0.0101308	0.06226	10.7496	0.5695	11.329	0.06635	3.6	0.948855	389.375	40.6173	457.675	41.7392	816.959	74.7395	47.6615
A-54	2450.69	166.263	13.8302	0.355795	0	0.08459	9.62286	0.6241	11.5343	0.05352	6.4	0.834283	523.442	48.3793	492.388	45.0033	350.417	143.736	149.377
A-55	7188.91	439.154	32.8816	0.19129	0.14582	0.07575	9.30414	0.6189	10.2812	0.05927	4.4	0.904965	470.728	42.2364	489.147	39.9087	576.364	95.0887	81.6721
A-56	8706.2	607.973	39.8157	0.13783	0.104234	0.06627	9.55315	0.5399	9.92303	0.05911	2.7	0.962725	413.63	38.2737	438.355	35.3258	570.37	58.4016	72.5197
A-57	7844.54	519.249	41.2224	0.613937	0.0888792	0.08032	9.09896	0.6562	9.73146	0.05927	3.5	0.935005	498.034	43.6096	512.311	39.1514	576.534	75.0147	86.3842
A-58	3214.23	202.926	16.427	0.414214	0	0.08208	9.22451	0.6422	10.0356	0.05676	4	0.919176	508.54	45.1077	503.662	39.8488	481.563	87.3142	105.602
A-59	6281.09	405.437	30.0089	0.228157	0	0.07509	9.47908	0.5816	9.95809	0.0562	3.1	0.951897	466.738	42.6788	465.511	37.1835	459.463	67.6641	101.583
A-60	7111.62	445.781	33.4274	0.0960329	0.528962	0.07599	9.31816	0.6019	10.1302	0.05746	4	0.919836	472.125	42.421	478.429	38.6484	508.76	87.3831	92.7991
A-61	18581.1	666.635	50.518	0.498023	3.82214	0.07415	9.31379	1.001	10.8282	0.09793	5.5	0.860145	461.1	41.4459	704.288	54.9996	1584.61	103.26	29.0987
A-62	5059.54	263.335	22.8885	1.06683	0.166896	0.0878	9.16525	0.7395	10.2255	0.0611	4.5	0.896312	542.491	47.6861	562.103	44.139	642.302	97.4795	84.4605
A-63	4907.34	212.067	24.4765	0.946268	0.312958	0.1165	9.18549	0.9974	9.94263	0.06212	3.8	0.923849	710.282	61.777	702.483	50.4119	677.621	81.3385	104.82
A-64	4241.18	251.721	19.6663	0.581711	0.255505	0.07917	9.39773	0.6274	10.2767	0.05749	4.2	0.914469	491.156	44.443	494.482	40.2289	509.912	91.4197	96.3217
A-65	12788.6	828.104	63.9922	0.0805892	0.0439085	0.0782	9.25123	0.6356	9.7164	0.05896	3	0.952125	485.395	43.256	499.551	38.3375	564.944	64.6919	85.9191
A-66	2405.49	152.155	12.814	0.433754	0	0.08538	9.27117	0.67	11.4938	0.05693	6.8	0.806621	528.161	47.0145	520.712	46.8223	488.17	149.907	108.192
A-67	83180.2	1.87397	0.240408	0.0636555	11.0304	0.1285	9.45902	1.259	11.0261	0.07112	5.7	0.857879	779.042	69.4112	827.592	62.4029	960.328	115.763	81.1225
A-68	11466.5	534.519	42.8698	2.16354	0	0.07878	9.12958	1.014	10.2625	0.09334	4.7	0.889605	488.856	42.9802	710.696	52.454	1494.22	88.6891	32.7165
A-69	7901.83	515.067	38.6828	0.091983	0.0481031	0.07613	9.19829	0.5986	9.70903	0.05704	3.1	0.947395	473.002	41.9503	476.337	36.9145	492.427	68.52	96.0553
A-70	7925.9	299.067	33.2235	0.423287	0.0809878	0.112	9.16793	0.972	10.0084	0.06294	4	0.91602	684.542	59.5411	689.49	50.0903	705.666	85.4137	97.0066
A-71	5858.08	370.829	30.5086	0.195671	0.0750926	0.08326	9.35597	0.6772	10.0072	0.05901	3.6	0.934926	515.529	46.3545	525.106	41.0289	566.967	77.3102	90.9275
A-72	74826.8	686.572	162.571	0.282984	0.271908	0.2228	8.95695	4.443	9.06486	0.1447	1.4	0.988096	1296.8	105.216	1720.47	75.1339	2283.32	24.0044	56.7945
A-73	4936.83	147.682	20.3705	0.423561	0.0867604	0.1384	9.18105	1.309	10.1334	0.06862	4.3	0.906016	835.696	71.9605	849.769	58.3349	886.692	88.6394	94.2488
A-74	8696.22	487.857	34.2169	0.134774	0.799162	0.07072	9.17661	0.6158	9.87571	0.06317	3.6	0.92921	440.479	39.071	487.186	38.2149	713.325	77.5483	61.7501
A-75	14835.3	646.936	47.5822	0.395188	1.02381	0.07356	9.42929	0.7351	10.9367	0.0725	5.5	0.862168	457.553	41.6484	559.547	47.048	999.474	112.533	45.7794
A-76	7147.18	463.967	32.9204	0.426355	0.166942	0.07187	9.2463	0.5742	10.2292	0.05796	4.4	0.903917	447.411	39.966	460.744	37.8865	527.776	95.8879	84.7729
A-77	5365.33	322.679	25.5209	0.228431	0.0687624	0.08009	9.14687	0.6429	9.7985	0.05823	3.5	0.933497	496.674	43.7241	504.081	38.9322	537.842	76.8748	92.3457
A-78	18017	1172.52	57.7903	0.634265	4.16738	0.04904	10.9273	0.5295	12.0843	0.07832	5.2	0.904256	308.65	32.9324	431.466	42.4774	1154.5	102.396	26.7345
A-79	16385.7	814.52	58.2727	0.73245	0.0278047	0.07136	9.27972	0.7439	10.0945	0.07564	4	0.919288	444.314	39.8423	564.688	43.7231	1084.85	79.6599	40.9563
A-80	4421.46	266.673	19.918	0.0866734	0.111277	0.07579	9.29416	0.5847	10.3194	0.05597	4.5	0.90065	470.93	42.2085	467.486	38.6613	450.607	99.5919	104.51
A-81	12392	154.13	39.9432	1.31174	0.0142057	0.2547	9.09959	3.259	9.54493	0.09284	2.9	0.953342	1462.54	119.068	1471.32	74.1615	1484	54.5981	98.5541
A-82	2125.12	105.963	9.78897	0.640371	0.27592	0.09318	8.99124	0.8064	10.057	0.06279	4.5	0.894029	574.3	49.4034	600.425	45.5859	700.351	95.9416	82.0018
A-83	9023.23	522.624	26.6619	0.150864	1.49913	0.05134	9.62934	0.4625	10.733	0.06536	4.7	0.897169	322.738	30.3124	386.024	34.4663	785.412	99.5625	41.0915
A-84	11691.5	610.847	53.9157	1.51673	0.06399	0.08935	9.21761	0.7223	9.52527	0.05865	2.4	0.967701	551.685	48.7369	552.03	40.562	553.455	52.4004	99.6803
A-85	7042.92	426.69	33.8484	0.0762721	0.125535	0.08041	9.33289	0.6335	9.6677	0.05716	2.5	0.965368	498.562	44.7764	498.266	38.0693	496.909	55.5711	100.333
A-86	6388.75	371.65	26.8854	0.155506	0.485264	0.0732	9.46313	0.597	10.1437	0.05917	3.7	0.932907	455.383	41.6066	475.329	38.5032	572.776	79.452	79.5046
A-87	6985.02	430.04	29.2244	0.186718	0.0198742	0.06877	9.32818	0.5589	10.1227	0.05895	3.9	0.921507	428.768	38.6951	450.794	36.8495	564.759	85.622	75.9206
A-88	31191.6	0.567239	0.100892	0.518724	0.0430361	0.1769	9.078	1.921	9.35746	0.07875	2.3	0.970135	1050.14	87.9714	1088.26	62.4812	1165.37	44.972	90.1115
A-89	7059.77	493.445	37.9499	0.495488	0.175606	0.07786	9.31319	0.6283	10.0733	0.05854	3.8	0.924546	483.341	43.3683	495.035	39.4668	549.496	83.82	87.9606
A-90	4369.62	193.358	15.1409	0.58536	3.85379	0.07919	9.25754	0.6516	14.2696	0.05969	11	0.648758	491.314	43.7936	509.486	57.1655	591.892	235.429	83.0075
A-91	3445.3	224.052	16.0416	0.341022	0	0.07276	10.0771	0.5447	12.3756	0.05432	7.2	0.814269	452.733	44.0571	441.55	44.3133	383.666	161.425	118.002
A-92	4078.66	245.77	19.7739	0.428622	0.233525	0.08145	9.22253	0.6575	10.2378	0.05856	4.4	0.900831	504.784	44.7778	513.082	41.2361	550.222	97.0476	91.742
A-93	4299.37	253.086	20.9215	0.586648	0.0987497	0.08365	9.27271	0.6818	9.80252	0.05914	3.2	0.945952	517.848	46.1405	527.878	40.3516	571.491	69.1594	90.6134
A-94	4230.4	262.448	19.5995	0.12008	0.225699	0.07569	9.07157	0.5976	10.1403	0.05728	4.5	0.894605	470.339	41.1478	475.687	38.513	501.56	99.7568	93.7751
A-95	4667.61	297.058	22.5535	0.148667	0	0.077	9.37693	0.5993	10.6883	0.05646	5.1	0.877311	478.218	43.2193	476.783	40.6674	469.883	113.544	101.774
A-96	5718.77	338.153	25.6665	0.407849	0.13898	0.07679	9.37633	0.6274	10.1628	0.05927	3.9	0.922617	476.952	43.1062	494.482	39.7829	576.5	85.2063	82.7323
A-97	3933.6	241.566	18.8405	0.506615	0.0577566	0.07905	9.10035	0.6243	9.74935	0.0573	3.5	0.933431	490.424	42.9749	492.561	38.0494	502.511	76.9885	97.5946
A-98	7044.39	449.174	31.9913	0.41558	0.099536	0.07206	9.16537	0.5892	10.1172	0.05932	4.3	0.905923	448.528	39.7117	470.333	38.0851	578.185	93.0938	77.5751
A-99	3822.13	234.538	18.3445	0.0942749	0.132828	0.07926	9.08445	0.6281	10.0595	0.0575	4.3	0.903076	491.688	43.0062	494.929	39.4061	509.952	94.9762	96.4185
A-100	5224.22	312.198	23.0733	0.26647	0.232166	0.07484	9.54452	0.6009	10.5556	0.05825	4.5	0.904213	465.253	42.8416	477.823	40.2314	538.617	98.6211	86.3793
A-101	4389.55	261.547	20.3821	0.268744	0.135837	0.07898	9.30406	0.6244	10.5049	0.05736	4.9	0.885687	490.012	43.9013	492.626	41.0024	504.8	107.314	97.0704
A-102	3155.76	183.774	14.2041	0.338534	0.362533	0.07831	9.24754	0.622	10.9619	0.05762	5.9	0.843605	486.04	43.2941	491.081	42.6818	514.662	129.294	94.4386
A-103	4588.84	256.877	23.0635	0.199727	0	0.09085	9.46387	0.741	11.7113	0.05918	6.9	0.808098	560.537	50.8075	563.007	50.6133	573.001	150.038	97.8248
A-104	5134.24	324.757	25.6706	0.0708562	0.0340416	0.08012	9.30451	0.6309	10.1355	0.05713	4	0.918016	496.867	44.4943	496.669	39.8121	495.759	88.57	100.223
A-105	27327.4	939.951	55.841	0.472277	6.27113	0.05803	9.21871	0.7995	10.5327	0.09996	5.1	0.875244	363.627	32.5938	596.567	47.5169	1622.77	94.7789	22.4078
A-106	6717.44	394.402	30.3021	0.239429	0.0205917	0.07774	9.06691	0.6344	9.55687	0.05921	3	0.948732	482.599	42.159	498.859	37.6676	574.172	65.6866	84.0512
A-107	5493.16	325.102	25.0142	0.123417	0	0.07813	9.97085	0.5941	11.003	0.05516	4.7	0.906194	484.941	46.5788	473.458	41.6359	418.188	103.919	115.962
A-108	12305.3	593.361	59.256	1.51523	0.052799	0.1007	9.08484	0.8772	9.60717	0.0632	3.1	0.945631	618.447	53.574	639.453	45.5833	714.394	66.3827	86.5694
A-109	969.618	0.0651451	0.00281642	0.938517	1.37272	0.04413	9.25066	0.3	13.2023	0.04932	9.4	0.700685	278.363	25.2024	266.379	30.9334	162.282	220.262	171.531
A-110	7682.87	502.879	26.7206	0.555767	0.0573373	0.05329	9.26854	0.5093	10.0017	0.06934	3.8	0.926695	334.67	30.2276	417.988	34.2697	908.303	77.4216	36.8457
A-111	23359.8	1084.05	95.7135	0.859145	0.0504085	0.08834	9.16604	0.8762	10.0322	0.07196	4.1	0.913665	545.729	47.9629	638.934	47.572	984.079	83.0143	55.4559
A-112	4093.69	230.104	19.2747	0.324288	0.232427	0.08468	9.28704	0.7028	10.4136	0.06021	4.7	0.891819	523.987	46.7377	540.45	43.6407	610.519	101.818	85.8264
A-113	34175	994.363	72.8744	1.70171	0.00885652	0.06898	9.25376	1.374	12.1155	0.1445	7.8	0.763794	429.985	38.4918	877.835	71.1975	2281.39	134.634	18.8475
A-114	5010.59	293.68	23.2096	0.191163	0.182165	0.07998	9.15172	0.6496	10.0508	0.05893	4.2	0.910547	496.016	43.6915	508.254	40.1894	563.701	90.512	87.9927
A-115	17509.1	889.568	81.9755	0.515676	0.021861	0.0932	9.23111	0.7661	9.5735	0.05963	2.5	0.964236	574.462	50.735	577.496	42.1653	589.454	55.0344	97.4565
A-116	6400.14	396.64	31.2103	0.0957581	0	0.07975	9.31145	0.6298	10.3177	0.05729	4.4	0.902472	494.625	44.3342	495.971	40.4838	502.188	97.8322	98.494
A-117	8613.95	507.49	40.0638	0.190804	0	0.07998	9.28783	0.6366	9.96832	0.05775	3.6	0.931735	495.997	44.3397	500.207	39.3714	519.516	79.448	95.4729
A-118	5811.14	357.746	25.0218	0.328401	0.223452	0.07095	9.19266	0.55	10.1575	0.05624	4.3	0.905011	441.898	39.2611	444.993	36.597	461.025	95.7908	95.8512
A-119	7723.28	427.595	31.872	0.434344	0.512393	0.07425	9.3899	0.7892	10.4467	0.07712	4.6	0.898835	461.694	41.8365	590.736	46.7895	1123.63	91.2762	41.0896
A-120	21966.7	0.14089	0.0324459	0.322229	0.00293314	0.2271	9.03529	2.784	9.22711	0.08895	1.9	0.979212	1319.12	107.783	1351.24	68.9305	1402.45	35.8573	94.0579
A-121	3894.35	223.878	17.9543	0.245037	0	0.08125	9.39364	0.6464	10.7277	0.05771	5.2	0.875642	503.579	45.5039	506.234	42.7647	518.25	113.737	97.1692
A-122	9362.81	408.784	38.9146	0.762534	0.0217942	0.09559	9.33283	0.8948	9.63713	0.06791	2.4	0.968424	588.494	52.4908	648.935	46.21	865.254	49.8228	68.014
A-123	3025.38	191.804	13.431	0.349435	0	0.07072	9.307	0.5972	10.6798	0.06126	5.2	0.871459	440.507	39.6286	475.472	40.5476	647.895	112.507	67.9905
A-124	4387.33	229.094	18.1345	0.271248	0.920324	0.07989	9.201	0.6828	11.2561	0.062	6.5	0.817425	495.494	43.8823	528.479	46.3753	673.605	138.674	73.5584
A-125	5748.02	284.977	25.061	0.668318	0.104298	0.08875	9.27024	0.7603	9.92899	0.06216	3.6	0.933654	548.126	48.7123	574.208	43.5459	678.834	75.9957	80.7452
A-126	6622.28	381.129	31.287	0.102285	0.306242	0.08308	9.29675	0.6747	9.95198	0.05892	3.6	0.93416	514.478	45.9709	523.587	40.7124	563.513	77.3646	91.2984
A-127	7097.88	414.166	32.4194	0.366932	0.152839	0.0793	9.25266	0.6309	10.1352	0.05772	4.1	0.912926	491.964	43.8262	496.673	39.8112	518.44	90.8014	94.8931
A-128	3730.01	202.655	14.5182	0.172373	0.286853	0.07195	9.61326	0.671	11.1385	0.06766	5.6	0.863062	447.896	41.5957	521.324	45.4158	857.484	116.81	52.2338
A-129	2889.8	164.813	14.1794	0.352978	0	0.08701	9.31654	0.716	10.9332	0.0597	5.7	0.852134	537.832	48.074	548.33	46.3222	592.194	124.04	90.8202
A-130	4792.53	252.702	21.1505	0.335235	0.00997222	0.0842	9.34022	0.763	10.5405	0.06574	4.9	0.88613	521.147	46.7607	575.744	46.3196	797.544	102.392	65.344
A-131	18926.3	943.489	78.3683	0.61088	0.455298	0.0837	9.51962	0.7374	9.96951	0.06392	3	0.954873	518.141	47.3949	560.876	42.9636	738.27	62.6635	70.1832
A-132	8958.12	565.312	38.9019	0.35615	0	0.06983	9.47747	0.538	10.1286	0.05589	3.6	0.935714	435.133	39.8785	437.104	35.9753	447.5	79.3961	97.2364
A-133	4334.72	281.157	21.5013	0.0843602	0	0.0777	9.30369	0.5835	10.6143	0.05448	5.1	0.876523	482.376	43.2408	466.699	39.7135	390.29	114.675	123.594
A-134	8902	555.859	42.8264	0.132138	0	0.0781	9.92285	0.6152	10.4686	0.05715	3.3	0.947868	484.746	46.3366	486.832	40.4862	496.658	73.5037	97.6017
A-135	6124.53	369.03	28.7448	0.0964485	0.0303065	0.07891	9.18021	0.629	9.44281	0.05783	2.2	0.97219	489.595	43.2814	495.496	37.0235	522.86	48.5084	93.6378
A-136	1971.59	114.16	9.88755	0.225617	0	0.08779	9.71563	0.6922	12.3561	0.0572	7.6	0.786303	542.44	50.545	534.108	51.3194	498.677	168.149	108.776
A-137	10778.7	591.961	44.7275	0.452739	0.113894	0.07618	9.2887	0.6637	9.73402	0.0632	2.9	0.954252	473.292	42.3876	516.847	39.4276	714.341	61.8342	66.2557
A-138	4100.68	245.884	18.7619	0.437788	0	0.0774	9.10404	0.6006	10.1267	0.05629	4.4	0.899017	480.6	42.1628	477.591	38.5818	463.169	98.2756	103.763
A-139	7353.38	425.169	33.4456	0.454213	0	0.07894	9.52402	0.746	9.90154	0.06856	2.7	0.961873	489.808	44.9212	565.925	42.9577	884.958	55.9823	55.3481
A-140	5137.67	310.032	23.3662	0.146457	0	0.07644	9.35006	0.5943	10.7184	0.05641	5.2	0.872335	474.865	42.8043	473.641	40.5713	467.715	116.04	101.529
A-141	11102.7	564.825	36.3897	0.291118	0.25922	0.06442	9.31826	0.6452	10.2328	0.07266	4.2	0.910624	402.474	36.3569	505.541	40.7488	1003.89	85.8244	40.0915
A-142	11440.3	649.123	22.6402	0.320132	2.21571	0.03498	9.59185	0.3347	10.7185	0.06942	4.8	0.894883	221.612	20.8954	293.14	27.2915	910.752	98.4943	24.3328
A-143	3914.05	250.304	20.3442	0.089755	0	0.08262	9.25468	0.6143	10.9248	0.05394	5.8	0.847124	511.741	45.5289	486.248	42.2111	367.827	130.814	139.125
A-144	10428	649.164	49.1434	0.126028	0.20343	0.07651	9.10751	0.6376	9.4683	0.06046	2.6	0.961895	475.265	41.7278	500.824	37.4322	619.373	55.8685	76.7333
A-145	7138.81	400.468	33.1546	0.446336	0	0.08384	9.16449	0.6719	9.73322	0.05814	3.3	0.941567	519.032	45.7021	521.884	39.7184	534.381	71.7708	97.1277
A-146	4803.19	283.124	21.9475	0.629152	0.151866	0.07861	9.36409	0.6134	10.0852	0.05661	3.7	0.928499	487.838	43.9959	485.723	38.9341	475.758	82.8128	102.539
A-147	4786.97	277.326	24.5909	0.101898	0	0.08977	9.67943	0.7244	10.8194	0.05854	4.8	0.894636	554.175	51.4	553.275	46.1511	549.569	105.555	100.838
A-148	3896.65	264.202	18.6944	0.627688	0	0.07183	10.8708	0.5494	17.1837	0.0555	13	0.632623	447.153	46.9617	444.634	61.8723	431.618	296.541	103.599
A-149	7180.78	455.643	33.57	0.180437	0.0793993	0.07444	9.22712	0.6233	9.89217	0.06074	3.6	0.93277	462.877	41.2129	491.911	38.5672	629.47	76.8245	73.5345
A-150	8998.11	469.568	39.8035	0.73742	0.0376342	0.08574	9.29651	0.7032	9.79674	0.05949	3.1	0.948939	530.32	47.3278	540.677	41.0687	584.594	67.085	90.7159
A-151	5698.89	340.89	28.2379	0.173812	0.213297	0.08393	9.20569	0.6672	10.7436	0.05768	5.5	0.856853	519.515	45.9486	519.024	43.6574	516.866	121.622	100.512
A-152	5243.97	294.405	24.1781	0.371773	0.112939	0.08312	9.49296	0.6749	10.4152	0.05891	4.3	0.911454	514.694	46.9601	523.691	42.6138	563.116	93.3479	91.401
A-153	5819.17	378.756	30.3361	0.0704538	0	0.08137	9.19067	0.6118	10.749	0.05454	5.6	0.855026	504.311	44.583	484.673	41.4268	392.846	125.054	128.374
a within-run background-corrected mean 207Pb signal in counts per second
b U and Pb content and Th/U ratio were calculated relative to GJ-1 and are accurate to approximately 10%.
c corrected for background, mass bias, laser induced U-Pb fractionation and common Pb (if detectable, see analytical method) using
Stacey & Kramers (1975) model Pb composition. 207Pb/235U calculated using 207Pb/206Pb/(238U/206Pb × 1/137.88). Errors are
propagated by quadratic addition of within-run errors (2SE) and the reproducibility of GJ-1 (2SD).
d Rho is the error correlation defined as err206Pb/238U/err207Pb/235U.
