# Supplementary figures and images for: A tectonic carpet of Variscan flysch at the base of a rootless accretionary prism in northwestern Iberia: U–Pb zircon age constrains from sediments and volcanic olistoliths
Source: Copernicus journal article supplement (doi:10.5194/se-12-835-2021), 2021-04-15

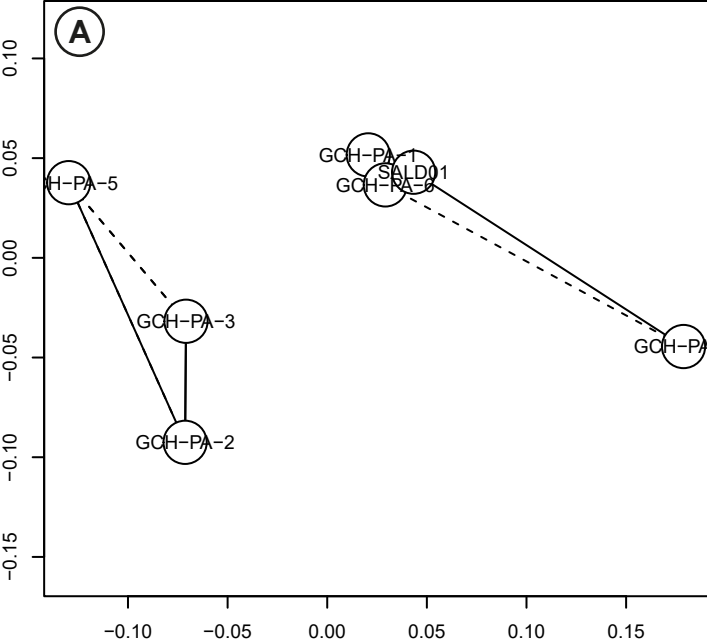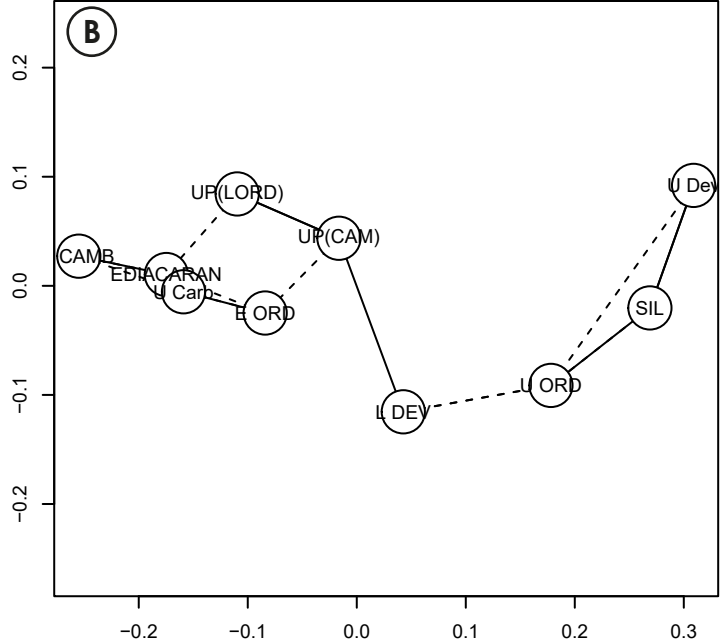

Supplement: Supplementary file 5 [file se-12-835-2021-supplement.zip › SUPP FILE FIGURES/FIG_SF1_3_MDS UPa_CIZ.pdf]

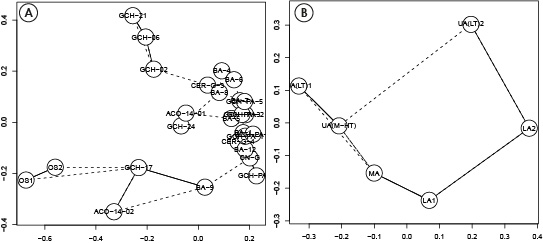

Supplement: Supplementary file 5 [file se-12-835-2021-supplement.zip › SUPP FILE FIGURES/FIG_SF1_6_MDS GTMZ.jpg]

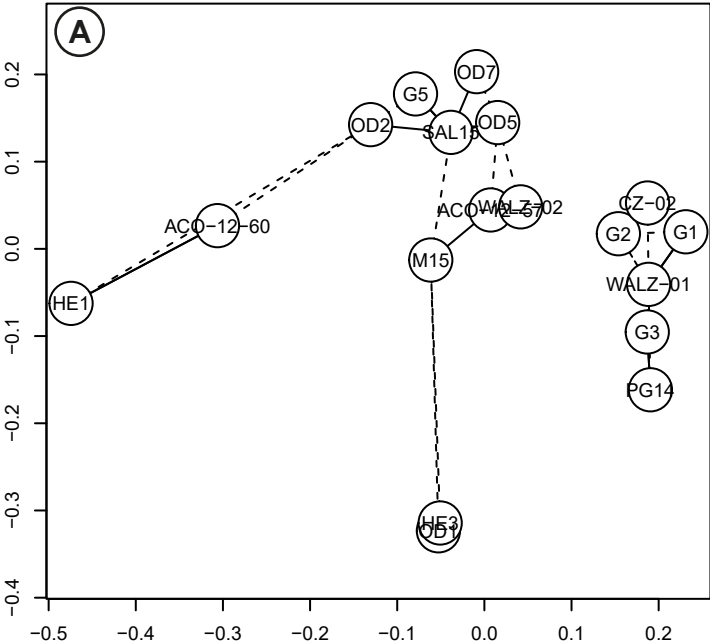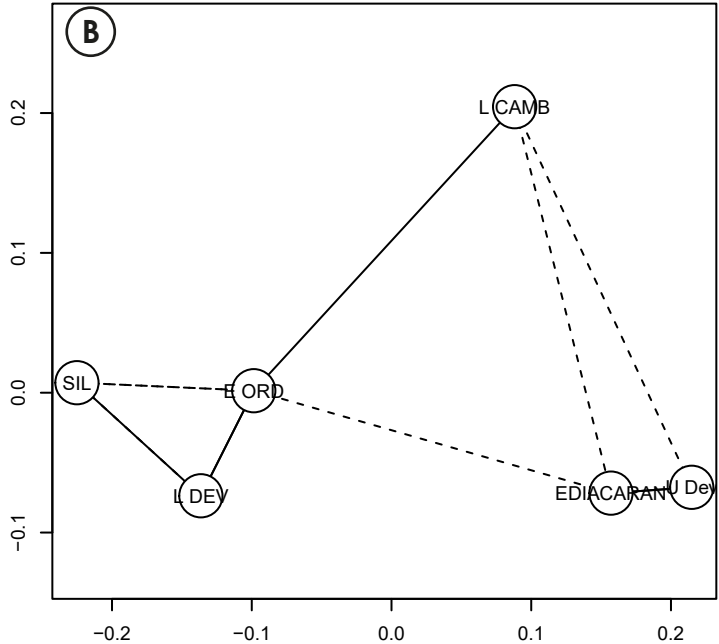

Supplement: Supplementary file 5 [file se-12-835-2021-supplement.zip › SUPP FILE FIGURES/FIG_SF1_4_MDS WALZ.pdf]

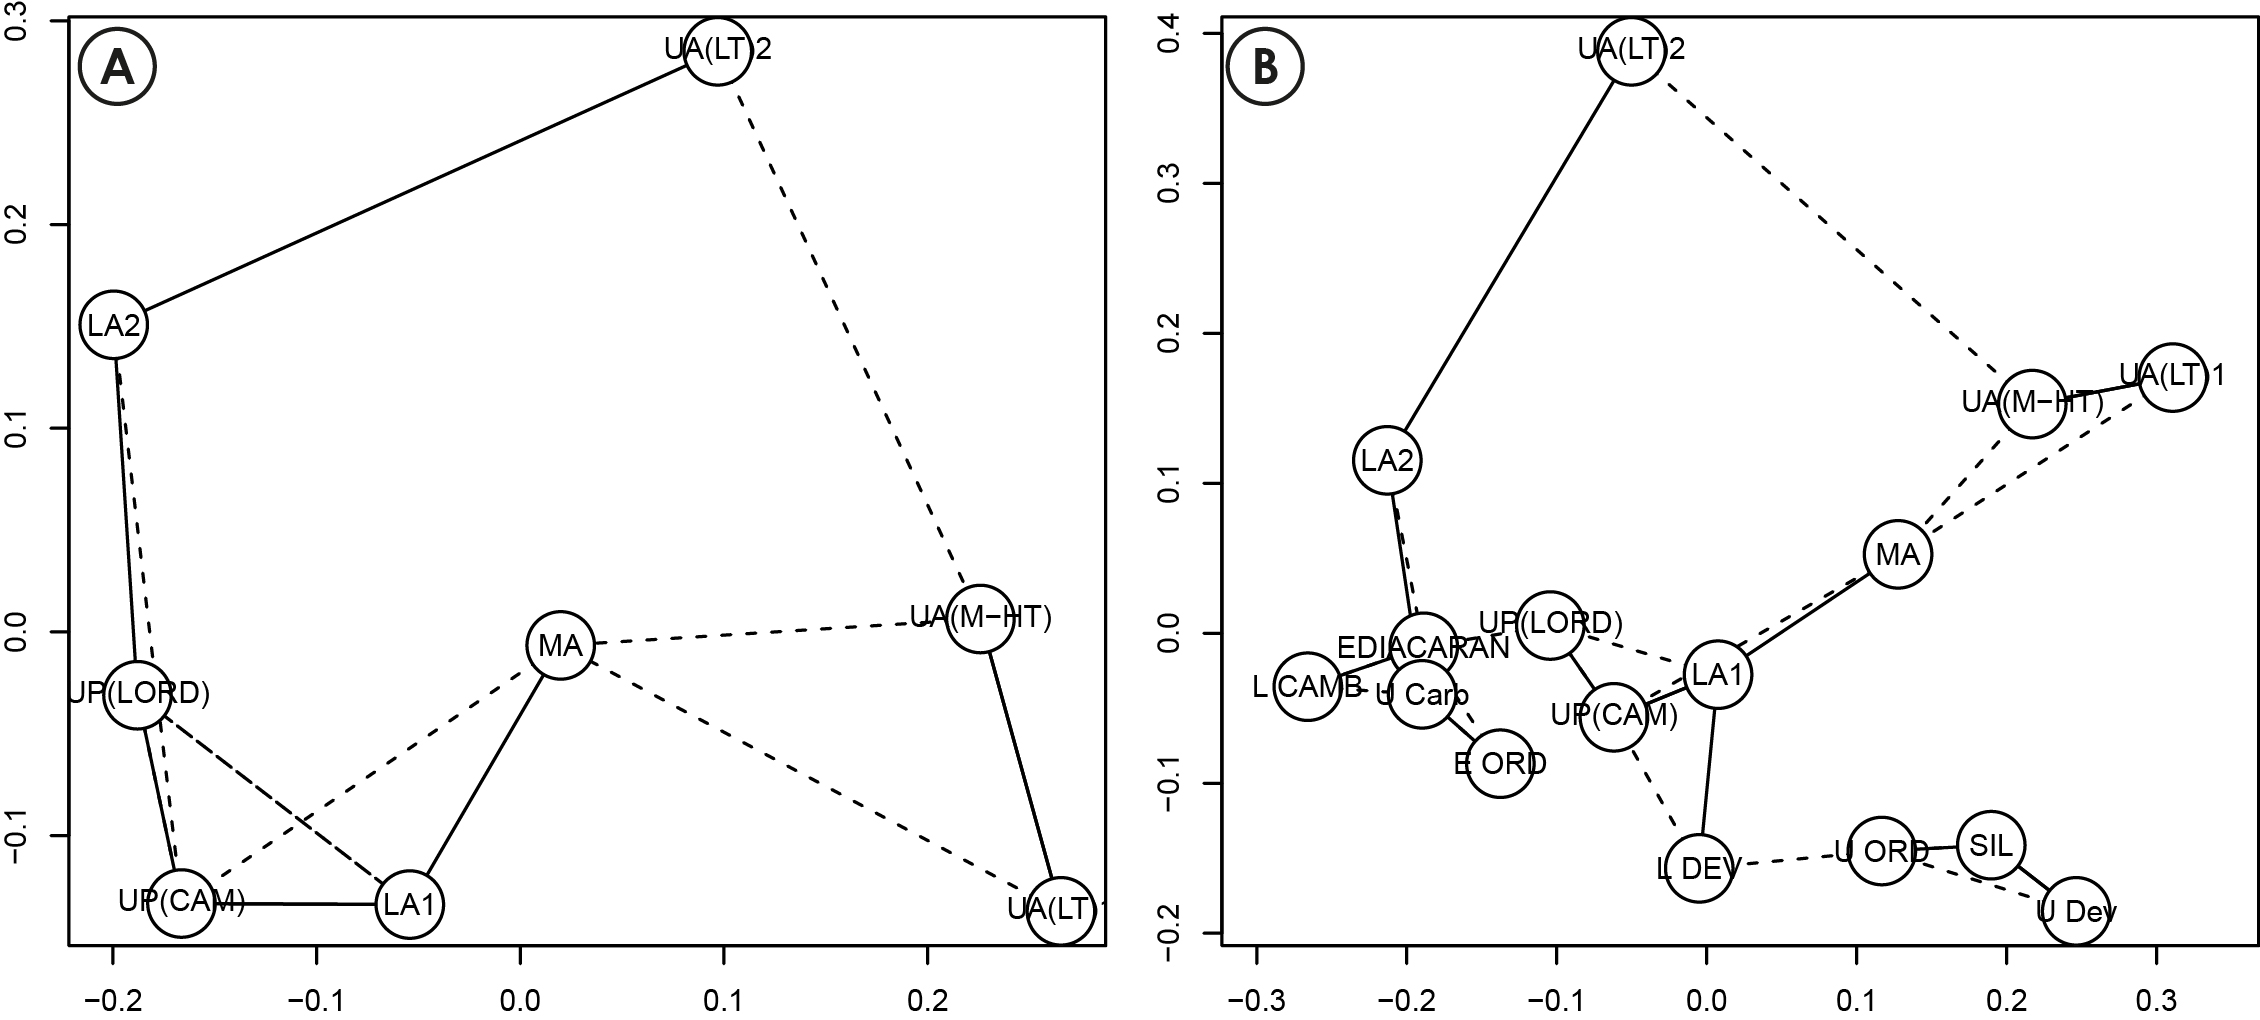

Supplement: Supplementary file 5 [file se-12-835-2021-supplement.zip › SUPP FILE FIGURES/FIG_SF1_7_MDS GTMZ_UP_CIZ.jpg]

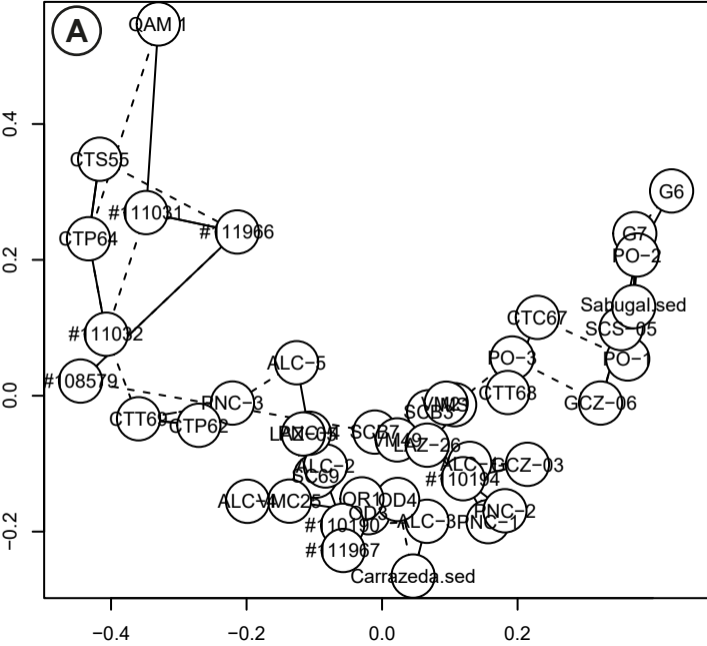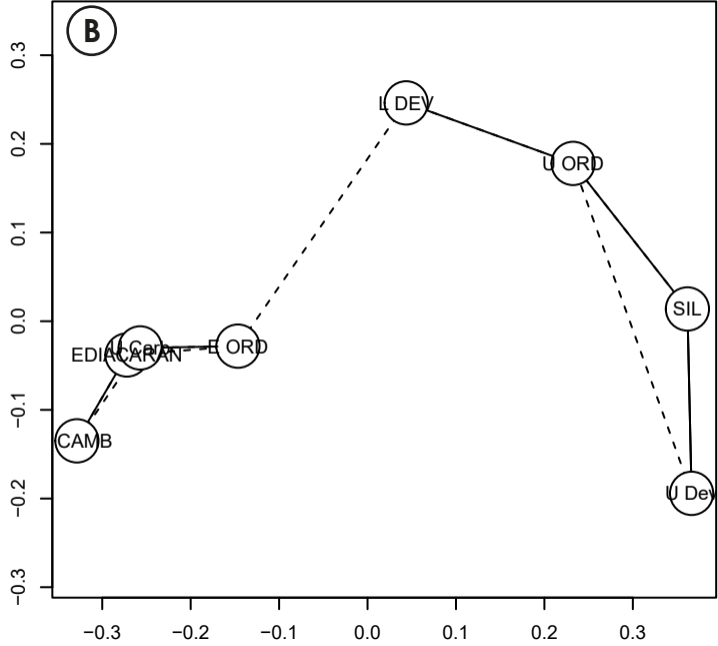

Supplement: Supplementary file 5 [file se-12-835-2021-supplement.zip › SUPP FILE FIGURES/FIG_SF1_2_MDS CIZ.pdf]

Group 7 - "Upper allochthon LT2 + Mix with Gondwana type"

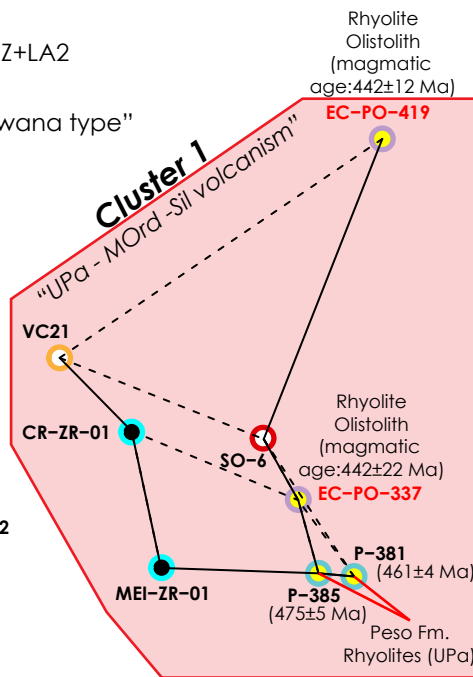

Olistoliths are labeled in **red**



Supplement: Supplementary file 5 [file se-12-835-2021-supplement.zip › SUPP FILE FIGURES/FIG_SF1_8_MDS_Synorogenics NWIberia.pdf]

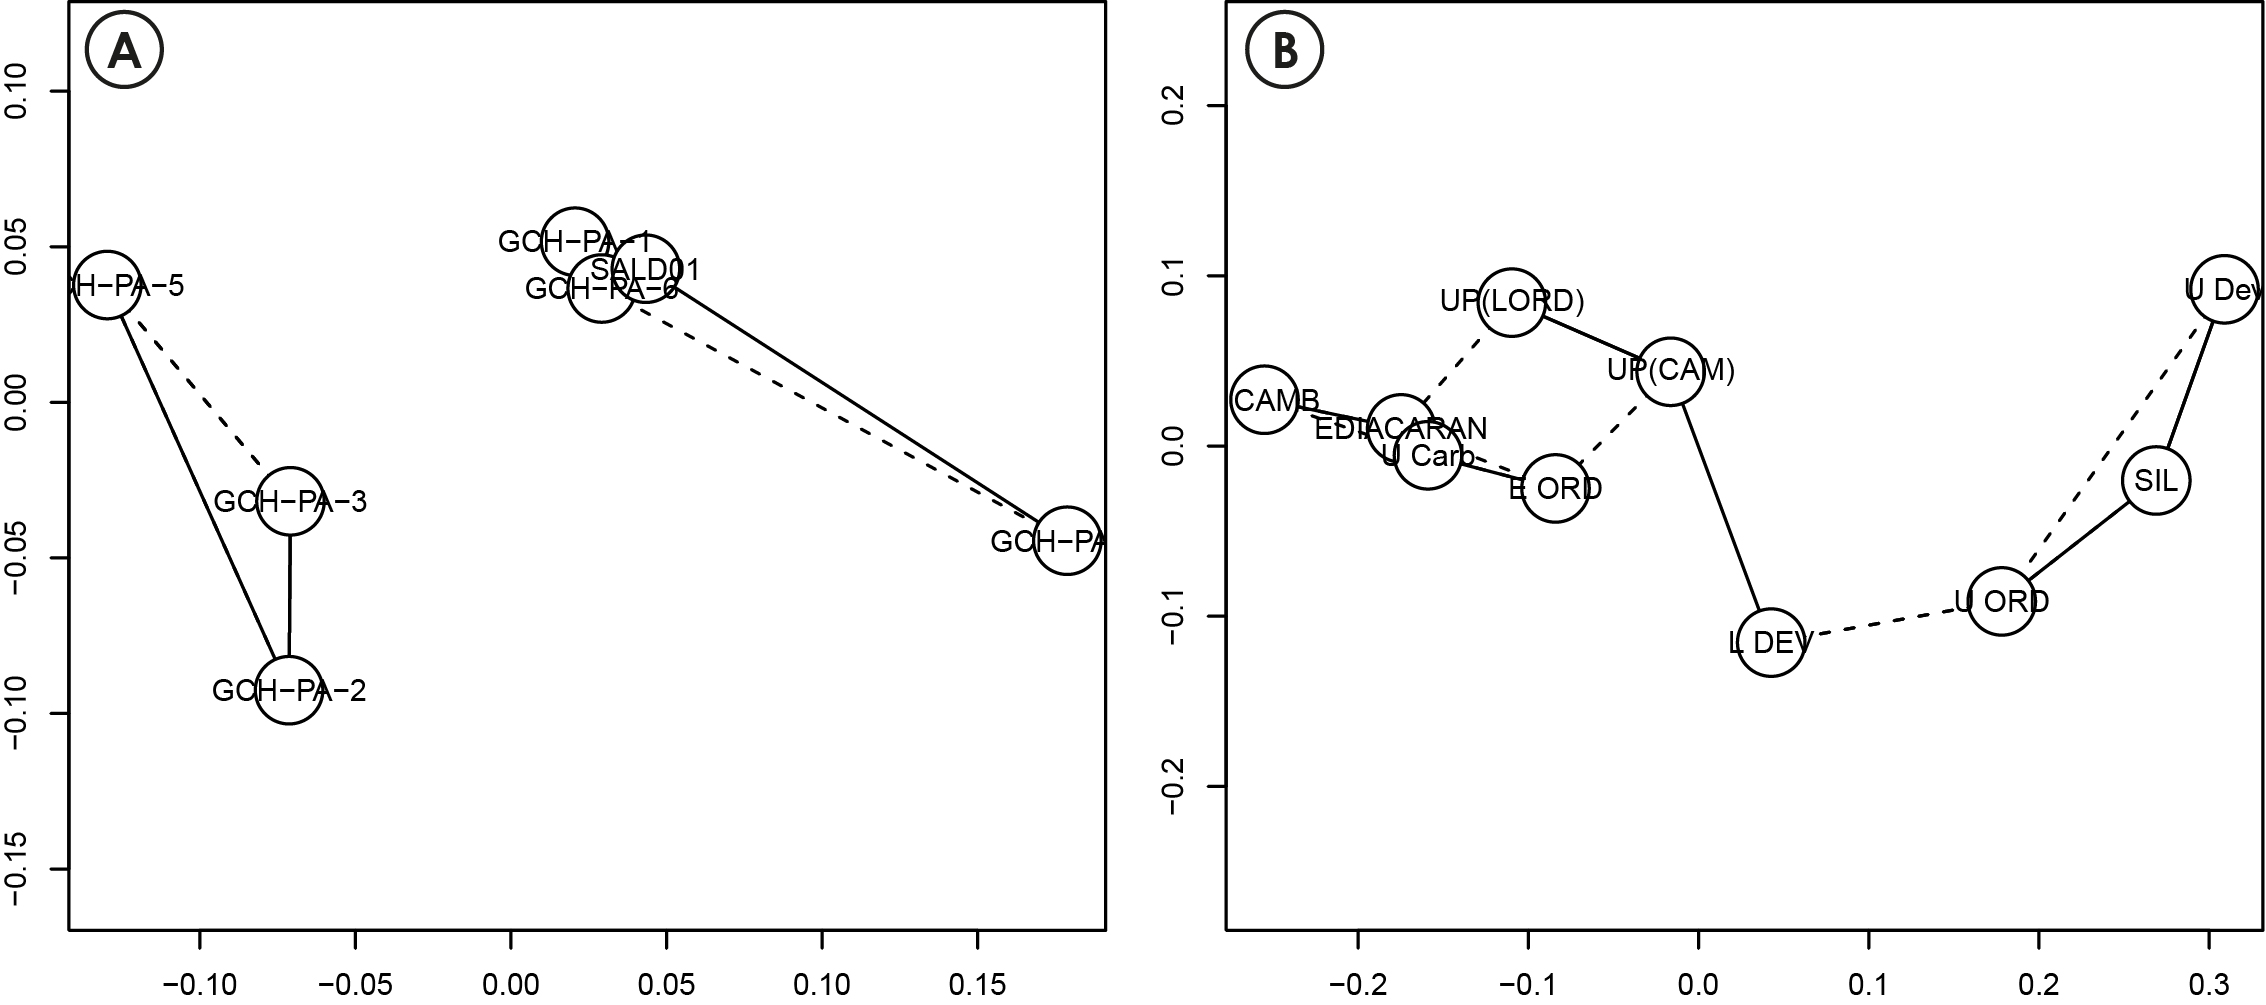

Supplement: Supplementary file 5 [file se-12-835-2021-supplement.zip › SUPP FILE FIGURES/FIG_SF1_3_MDS UPa_CIZ.jpg]

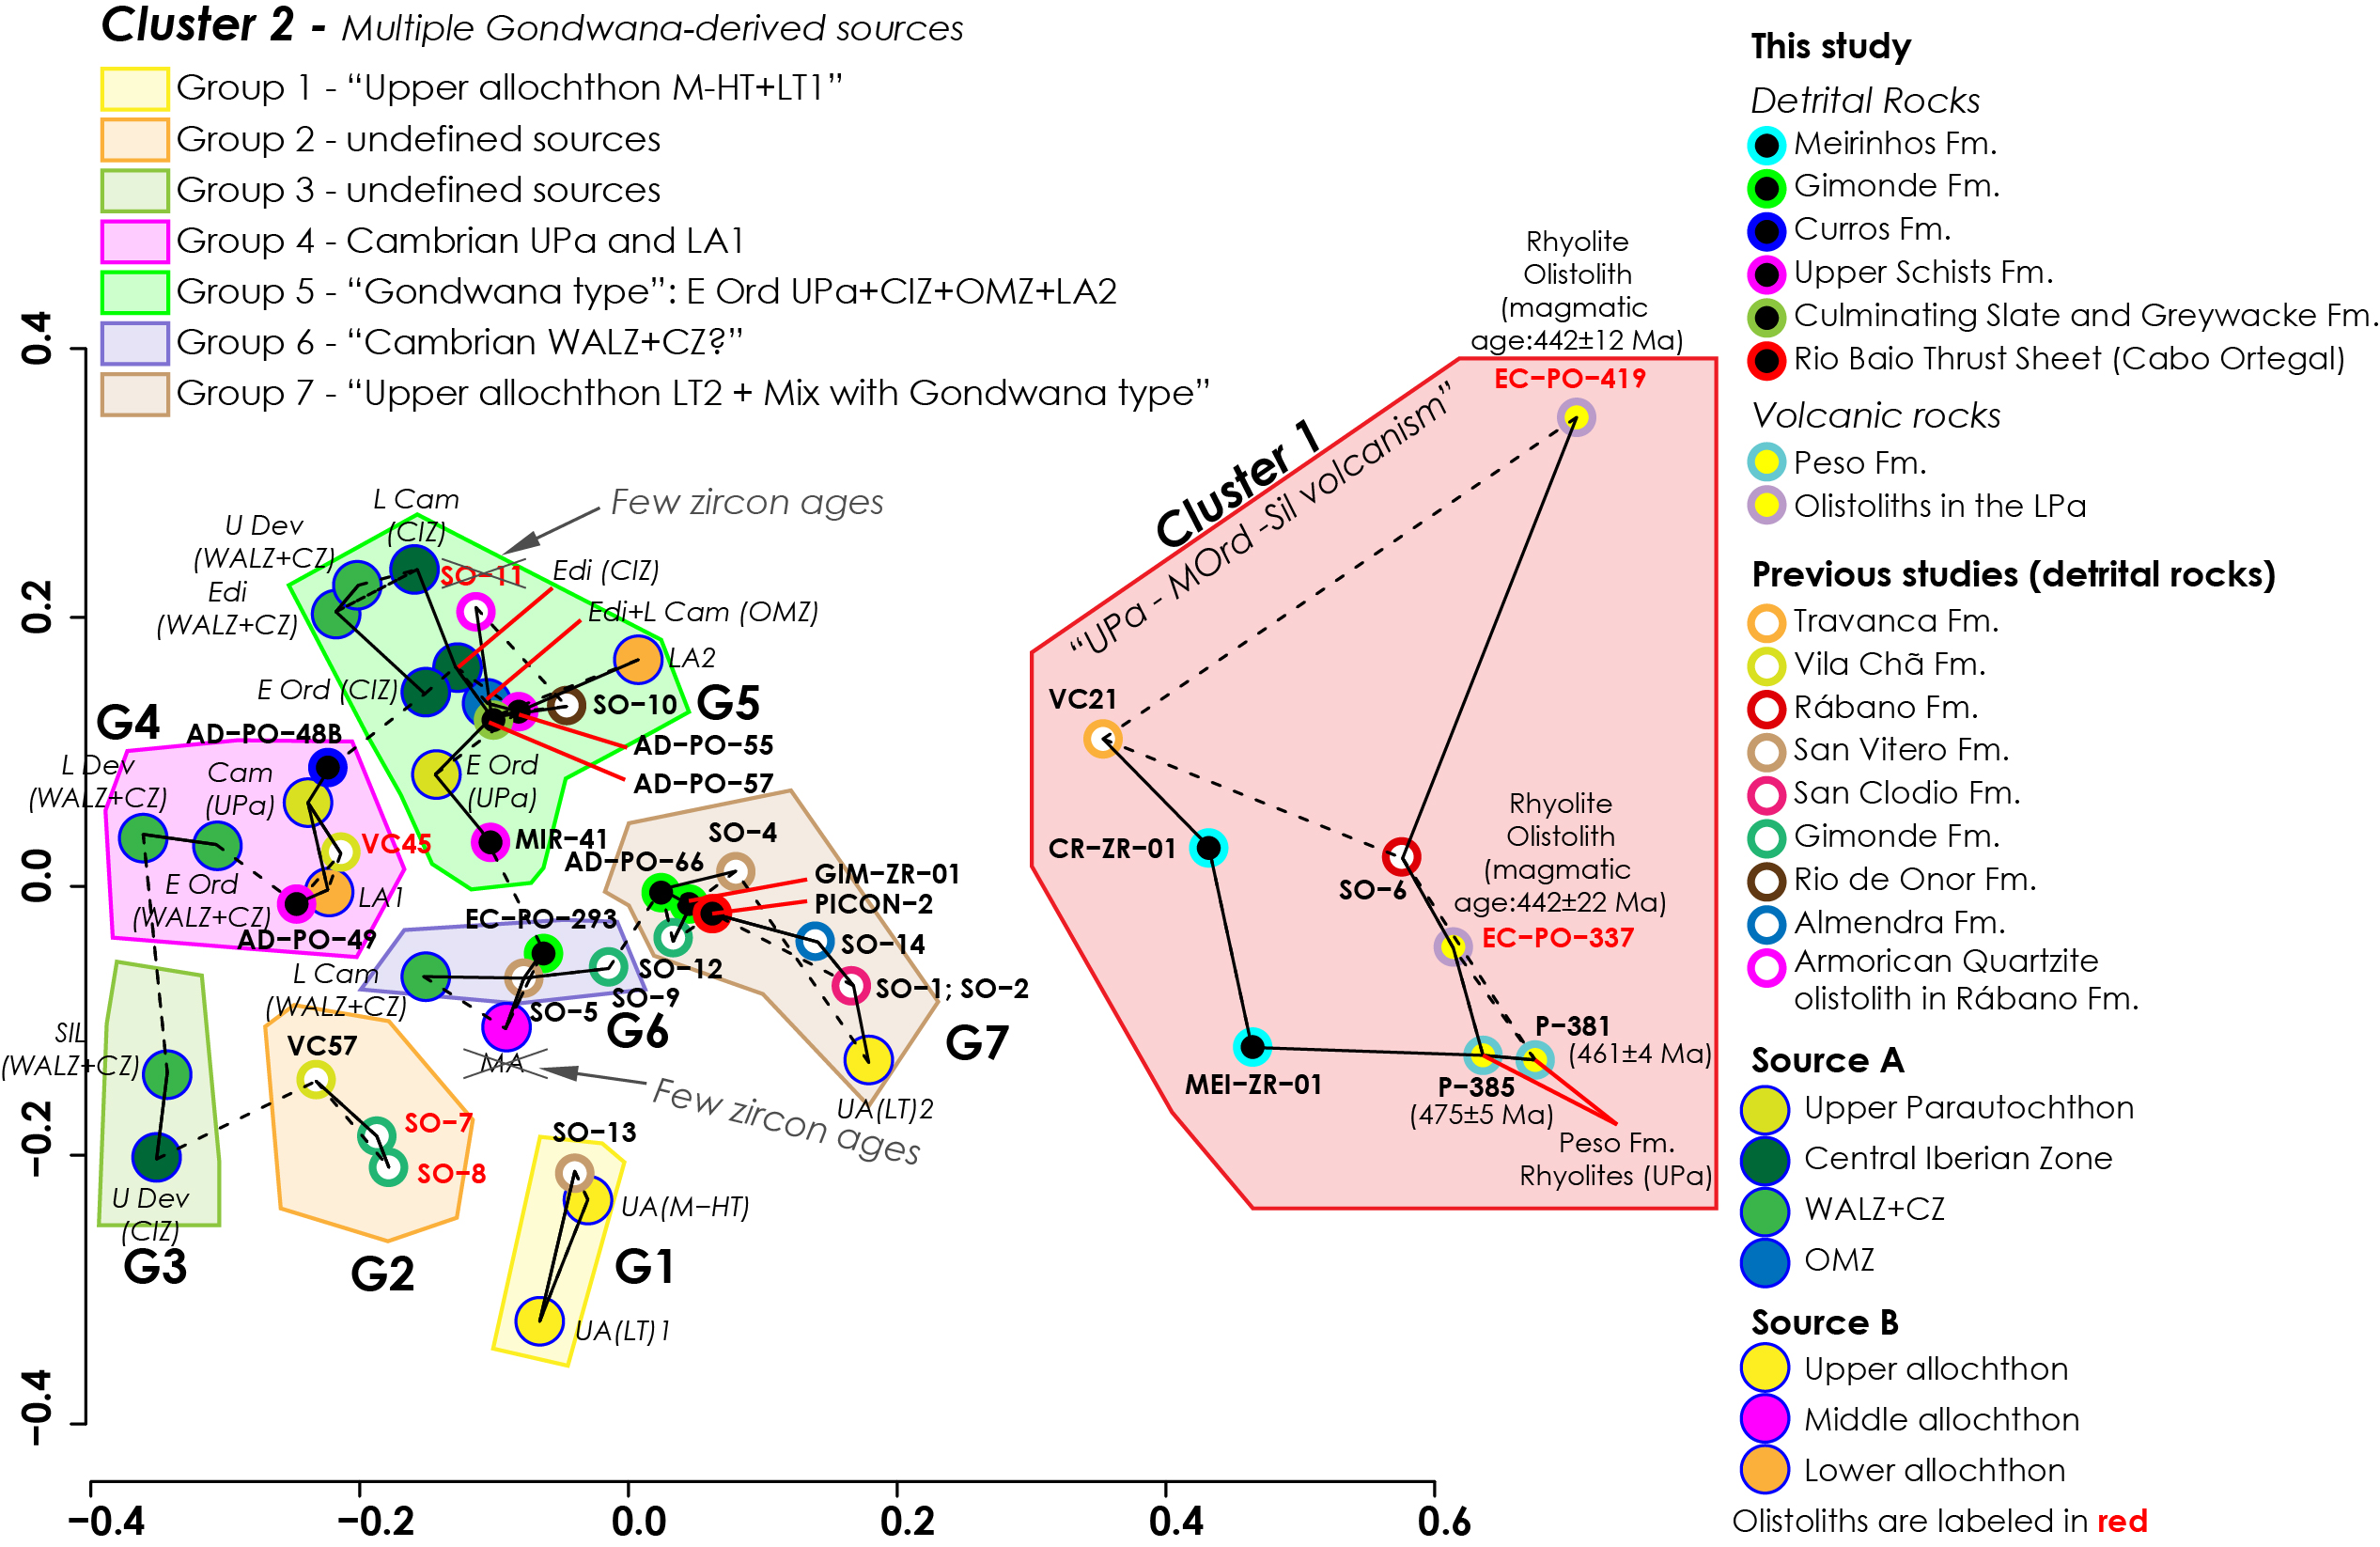

Supplement: Supplementary file 5 [file se-12-835-2021-supplement.zip › SUPP FILE FIGURES/FIG_SF1_8_MDS_Synorogenics NWIberia_REV.jpg]

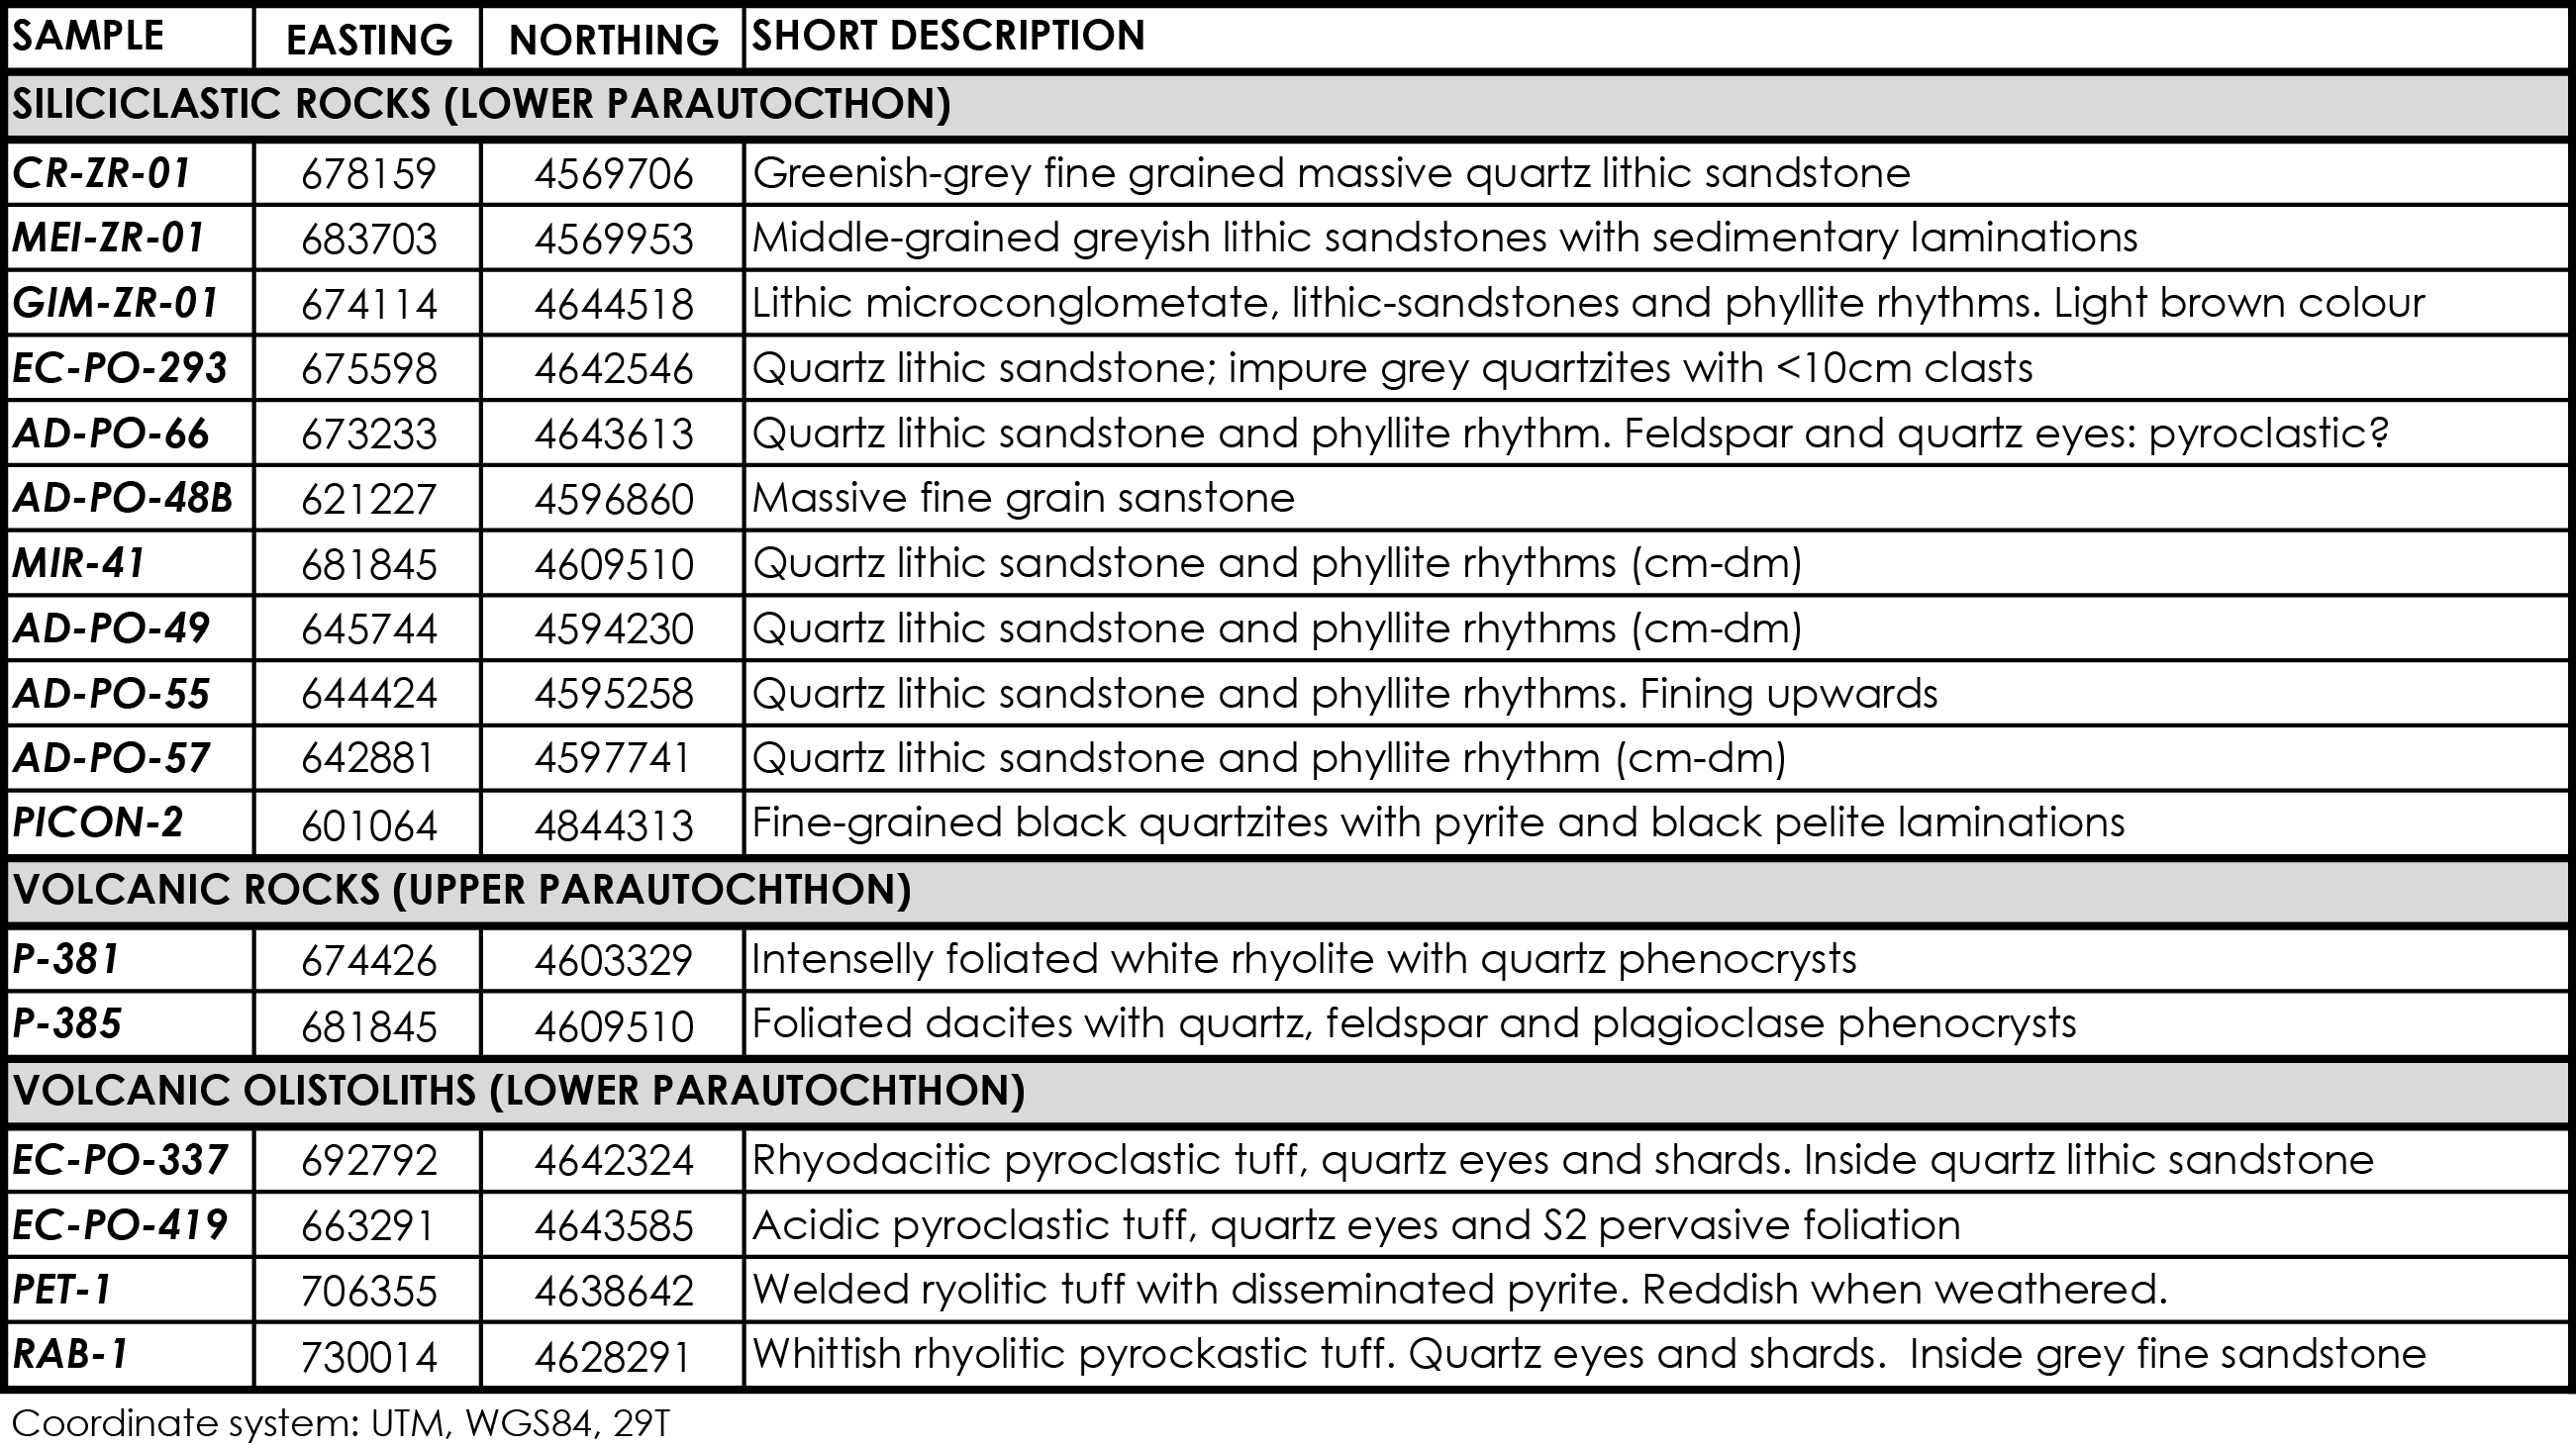

Supplement: Supplementary file 5 [file se-12-835-2021-supplement.zip › SUPP FILE FIGURES/TABLE SF1.jpg]

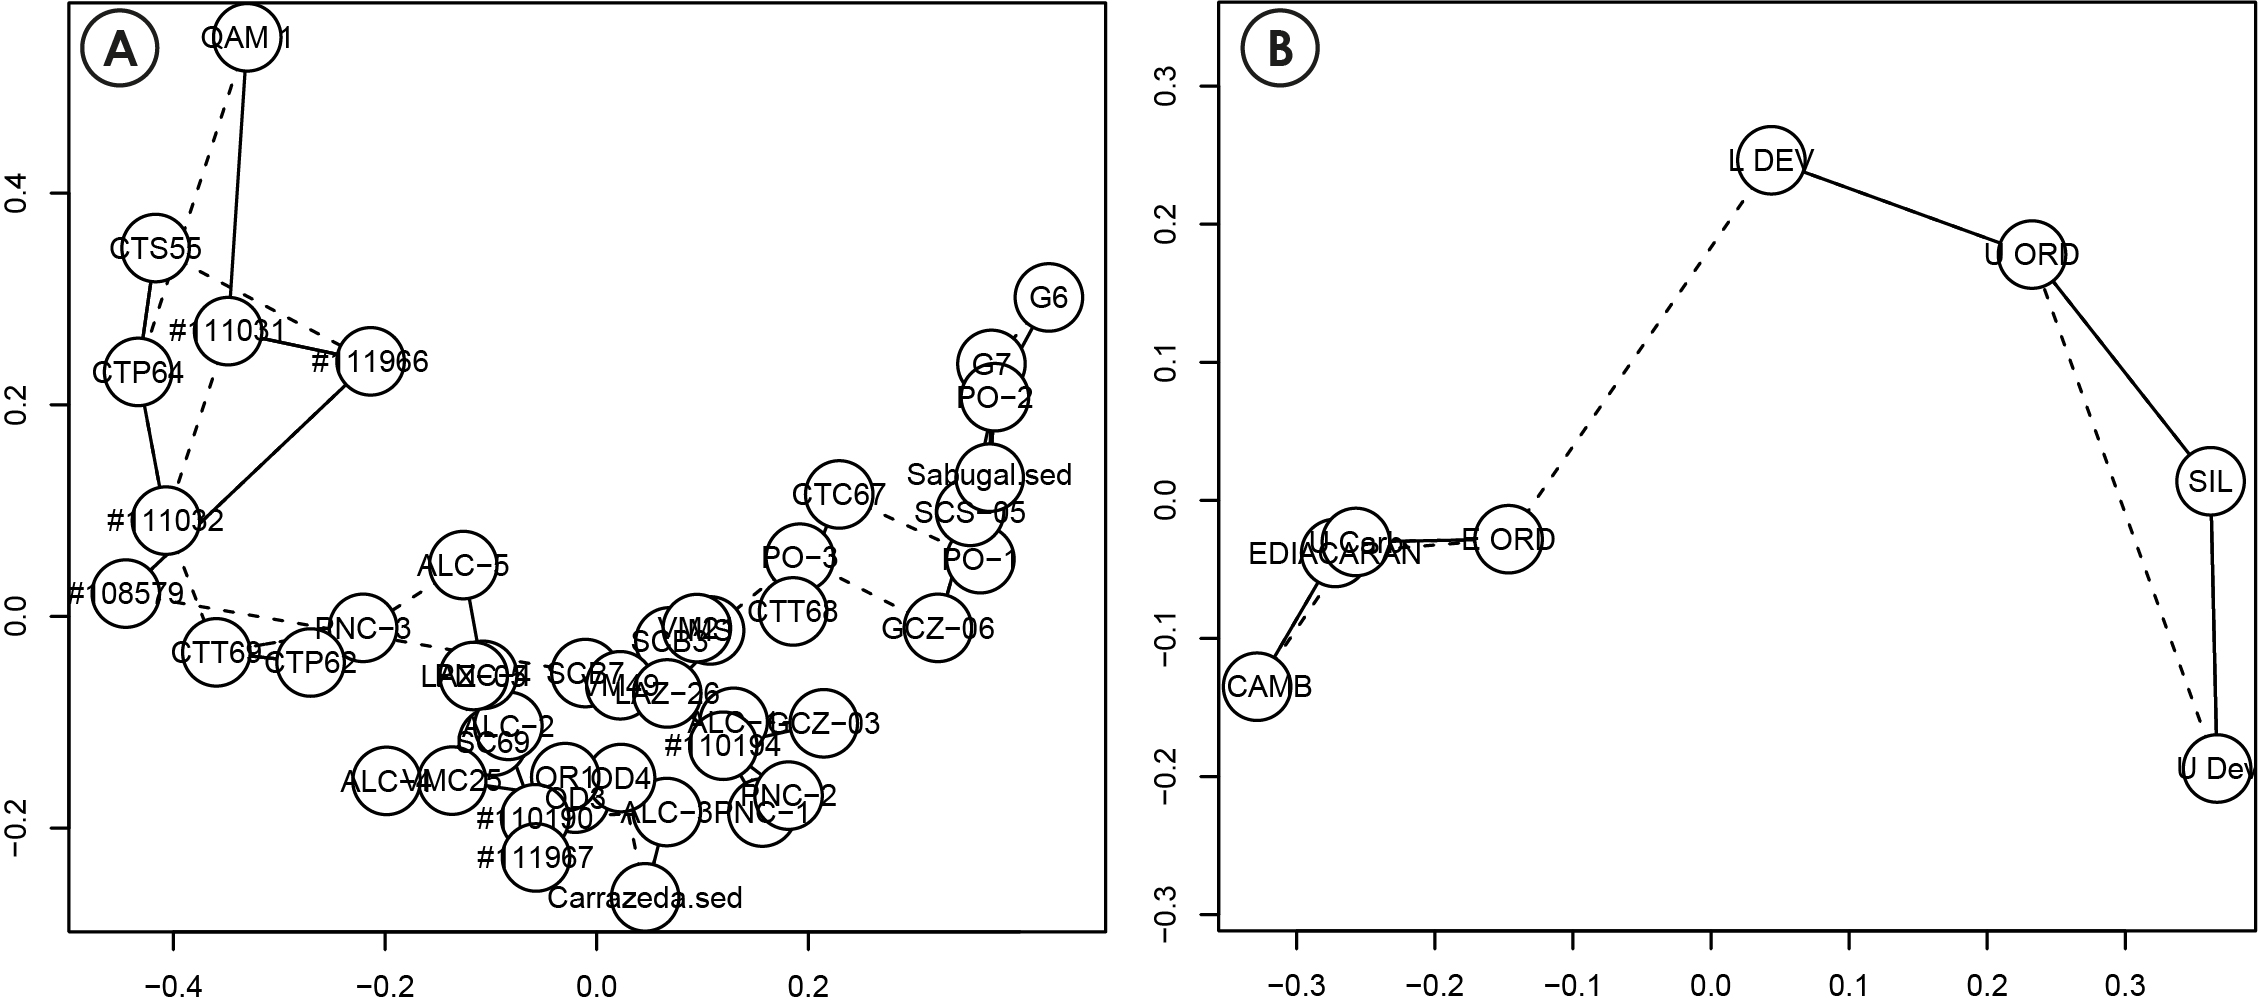

Supplement: Supplementary file 5 [file se-12-835-2021-supplement.zip › SUPP FILE FIGURES/FIG_SF1_2_MDS CIZ.jpg]

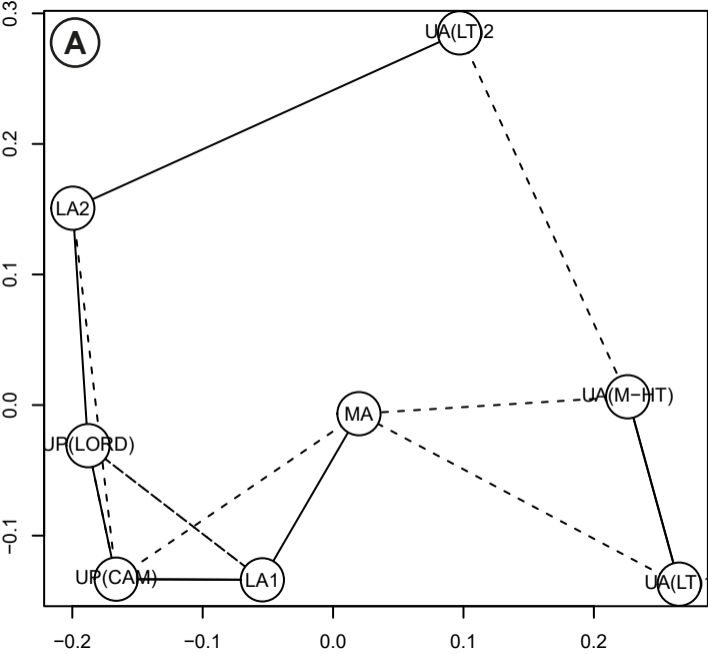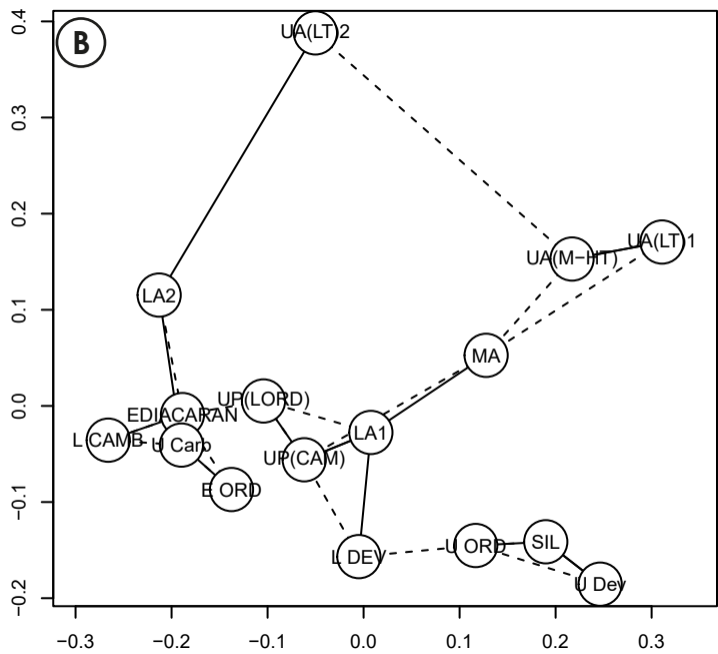

Supplement: Supplementary file 5 [file se-12-835-2021-supplement.zip › SUPP FILE FIGURES/FIG_SF1_7_MDS GTMZ_UP_CIZ.pdf]

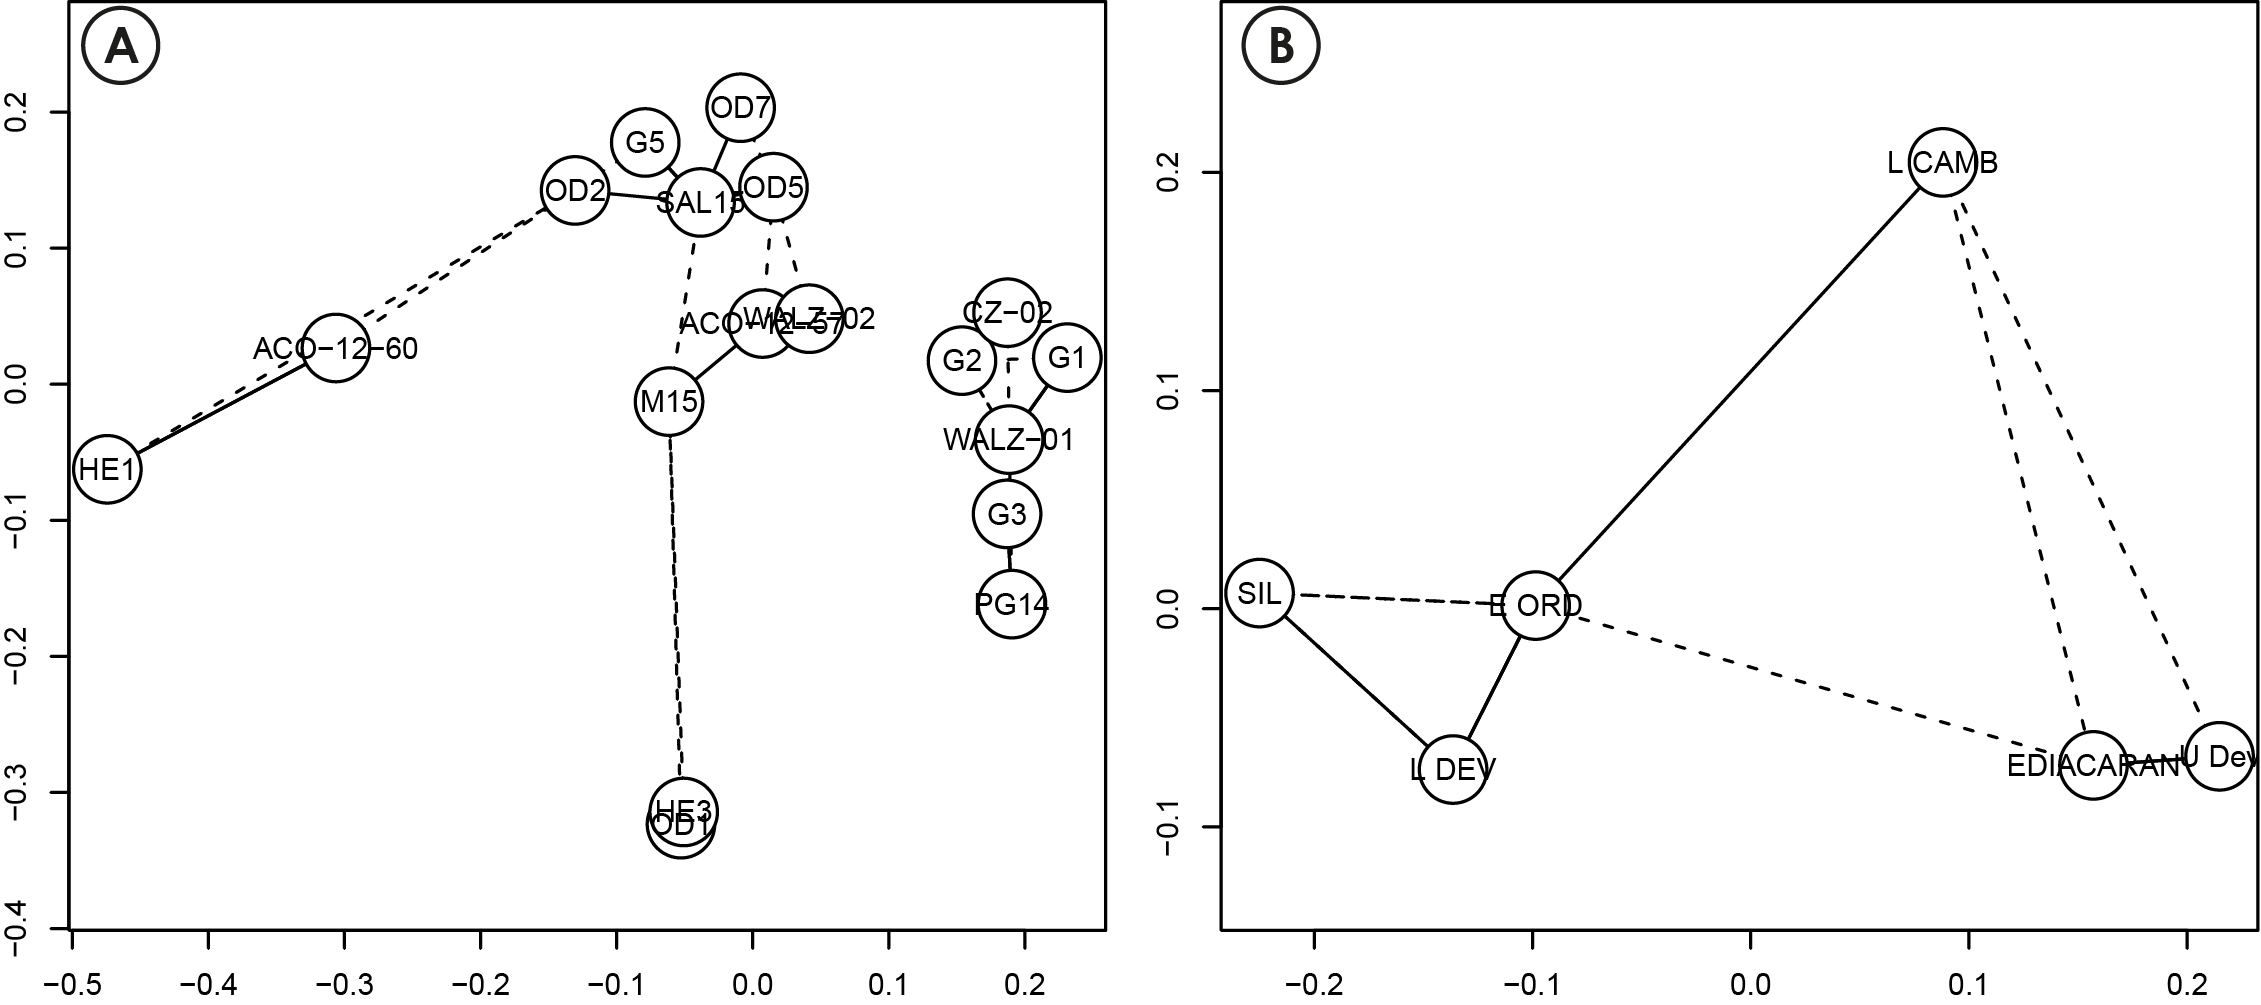

Supplement: Supplementary file 5 [file se-12-835-2021-supplement.zip › SUPP FILE FIGURES/FIG_SF1_4_MDS WALZ.jpg]

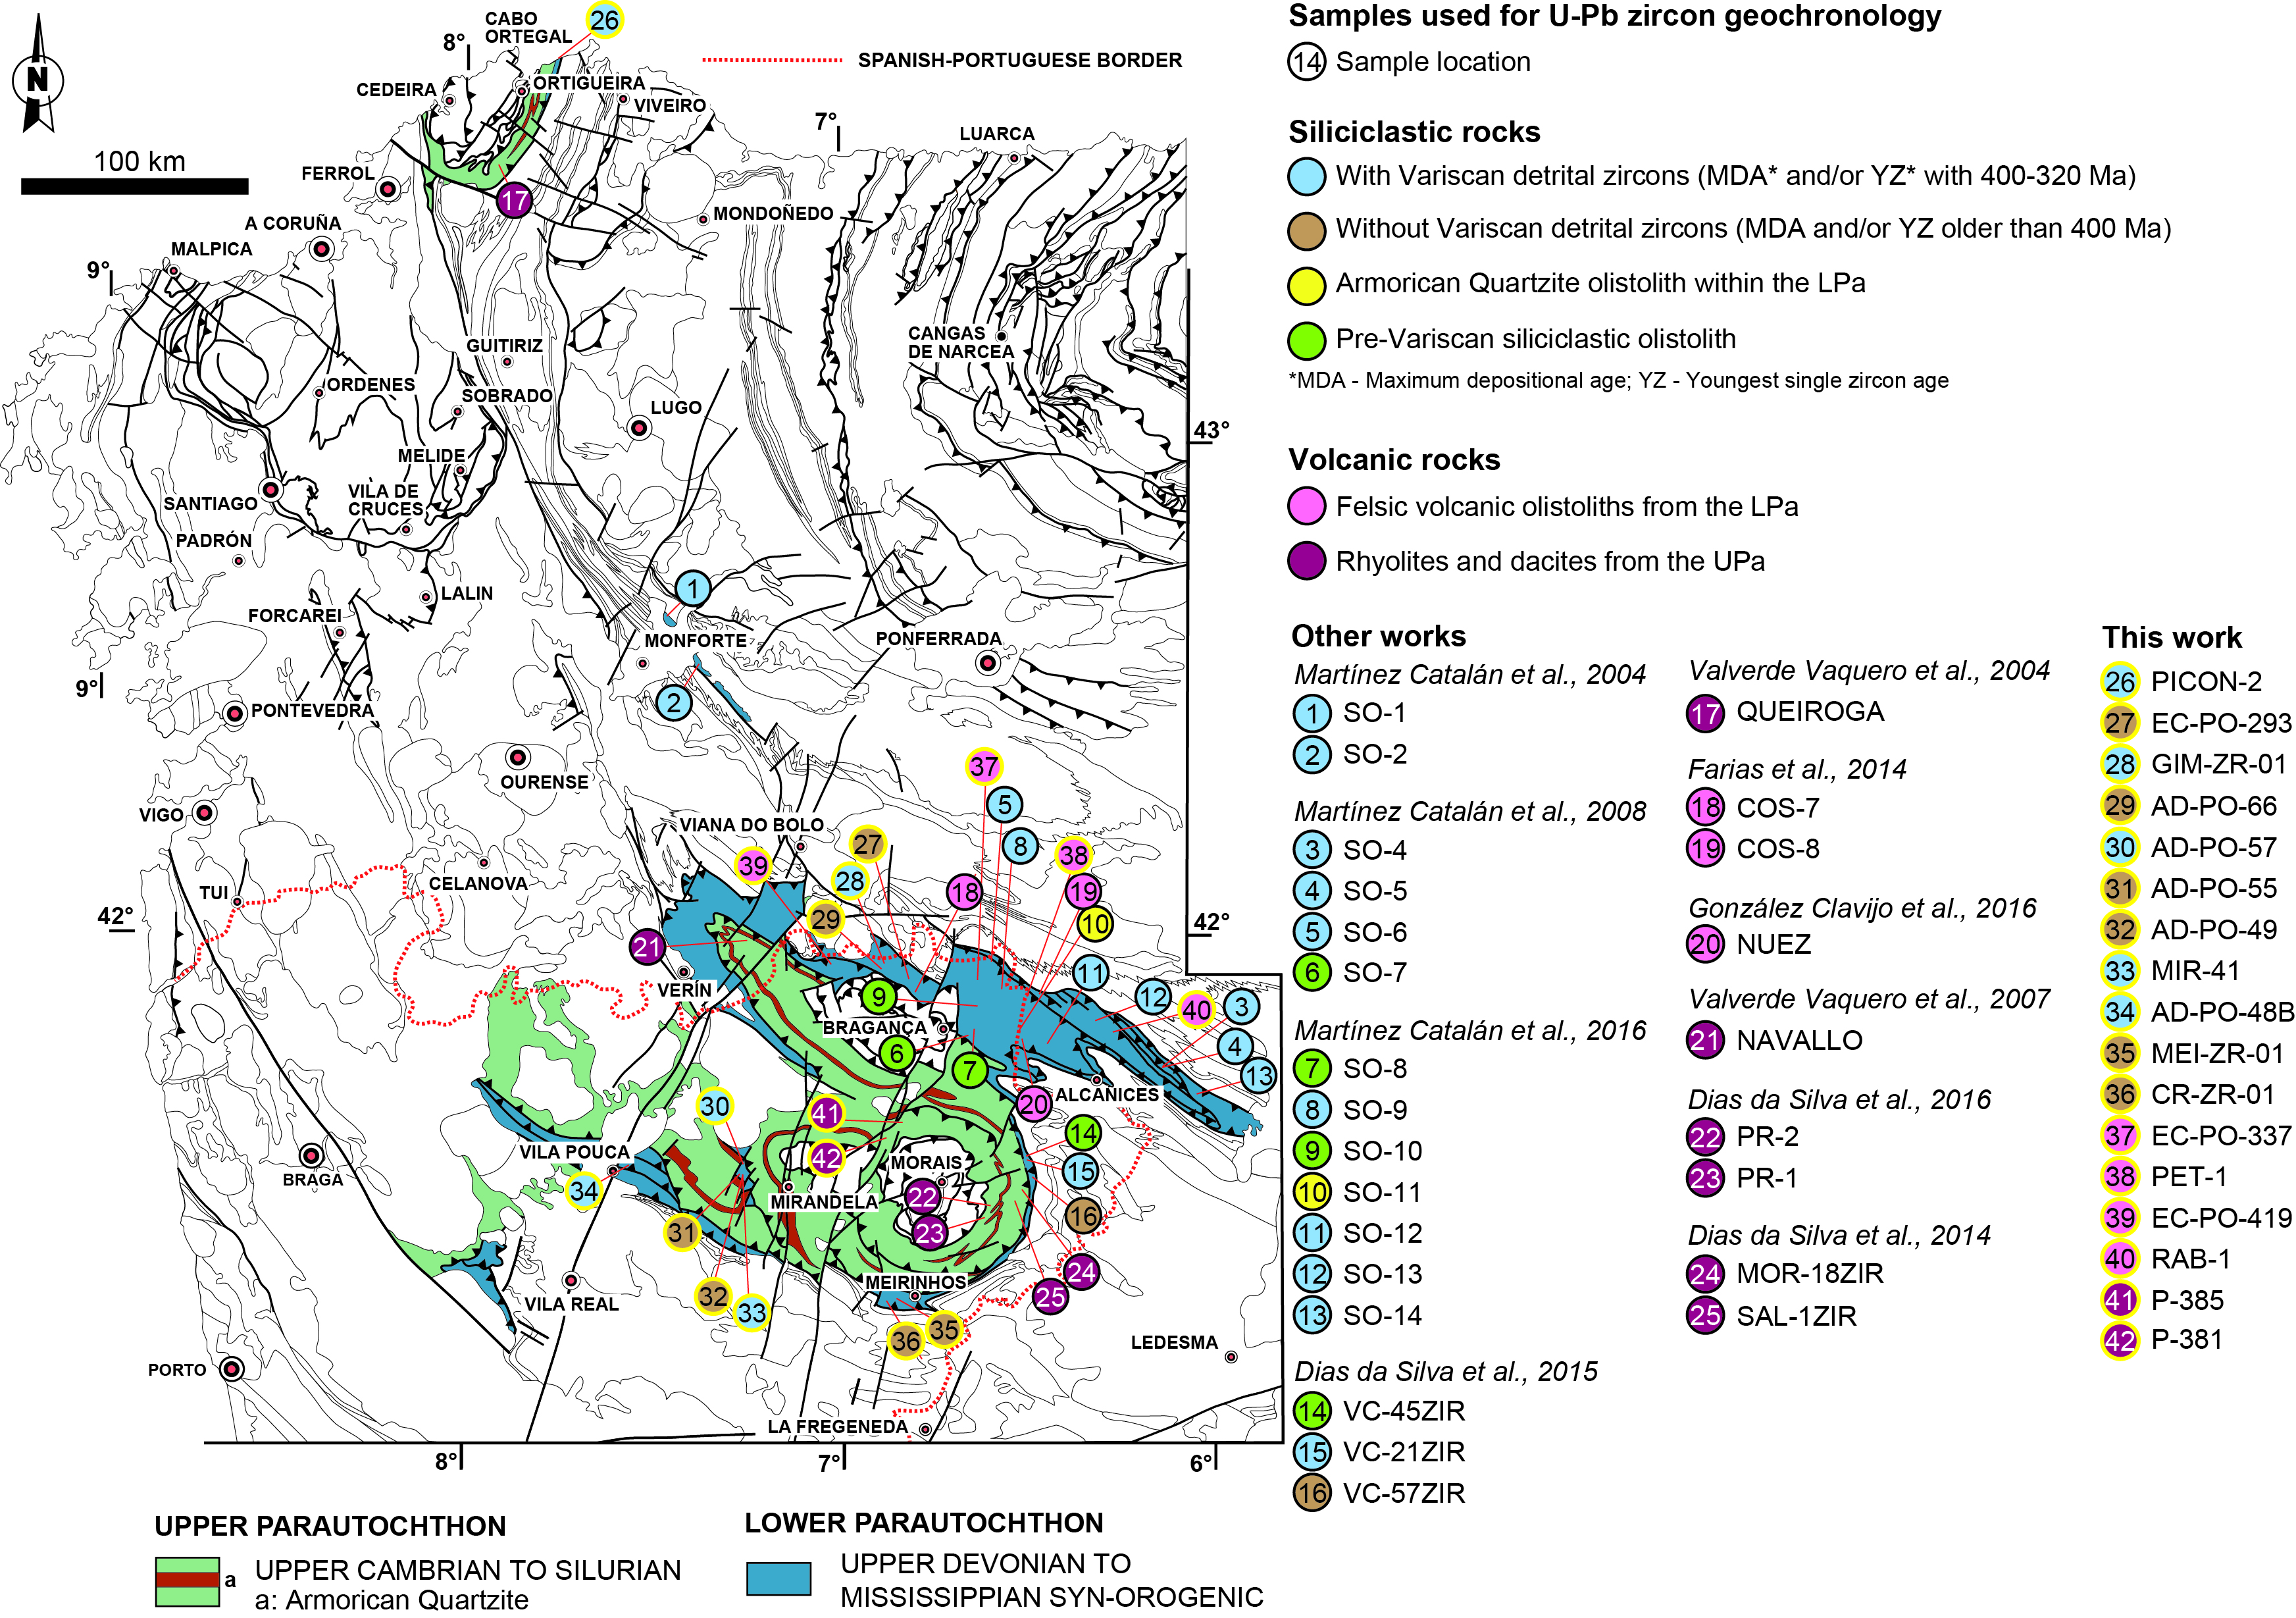

Supplement: Supplementary file 5 [file se-12-835-2021-supplement.zip › SUPP FILE FIGURES/FIG_SF1_1_Sample map.jpg]

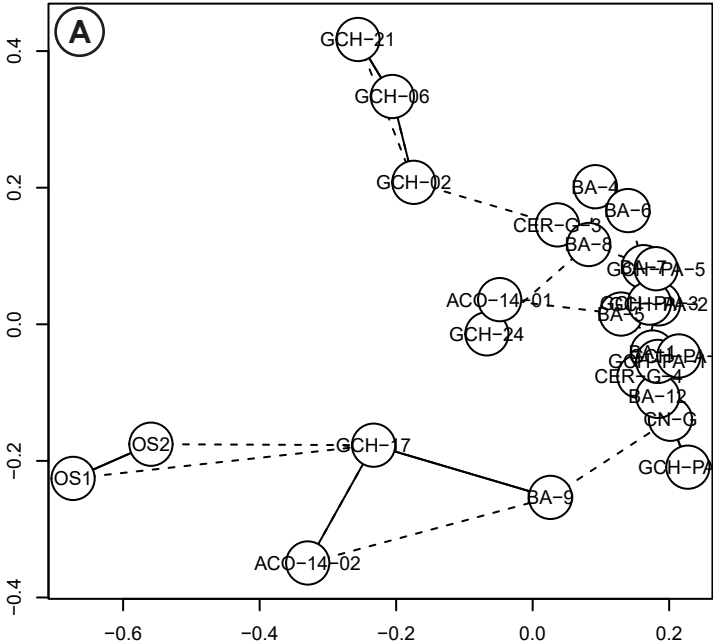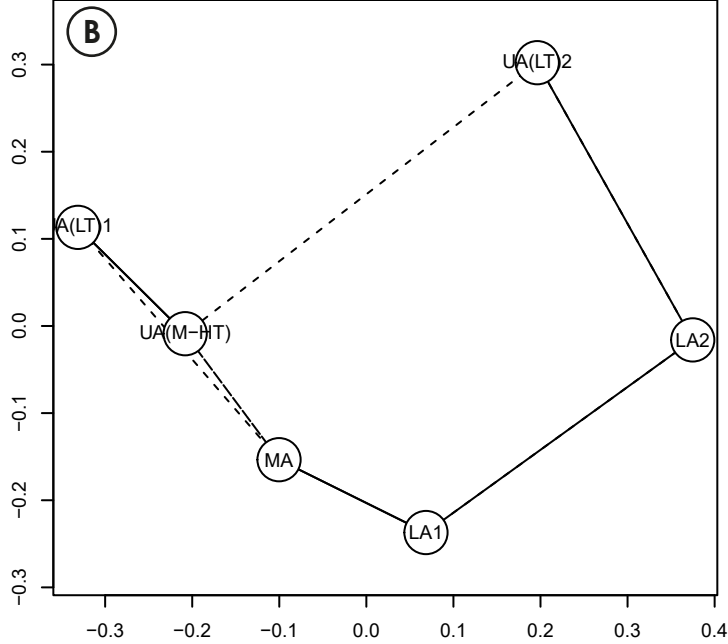

Supplement: Supplementary file 5 [file se-12-835-2021-supplement.zip › SUPP FILE FIGURES/FIG_SF1_6_MDS GTMZ.pdf]

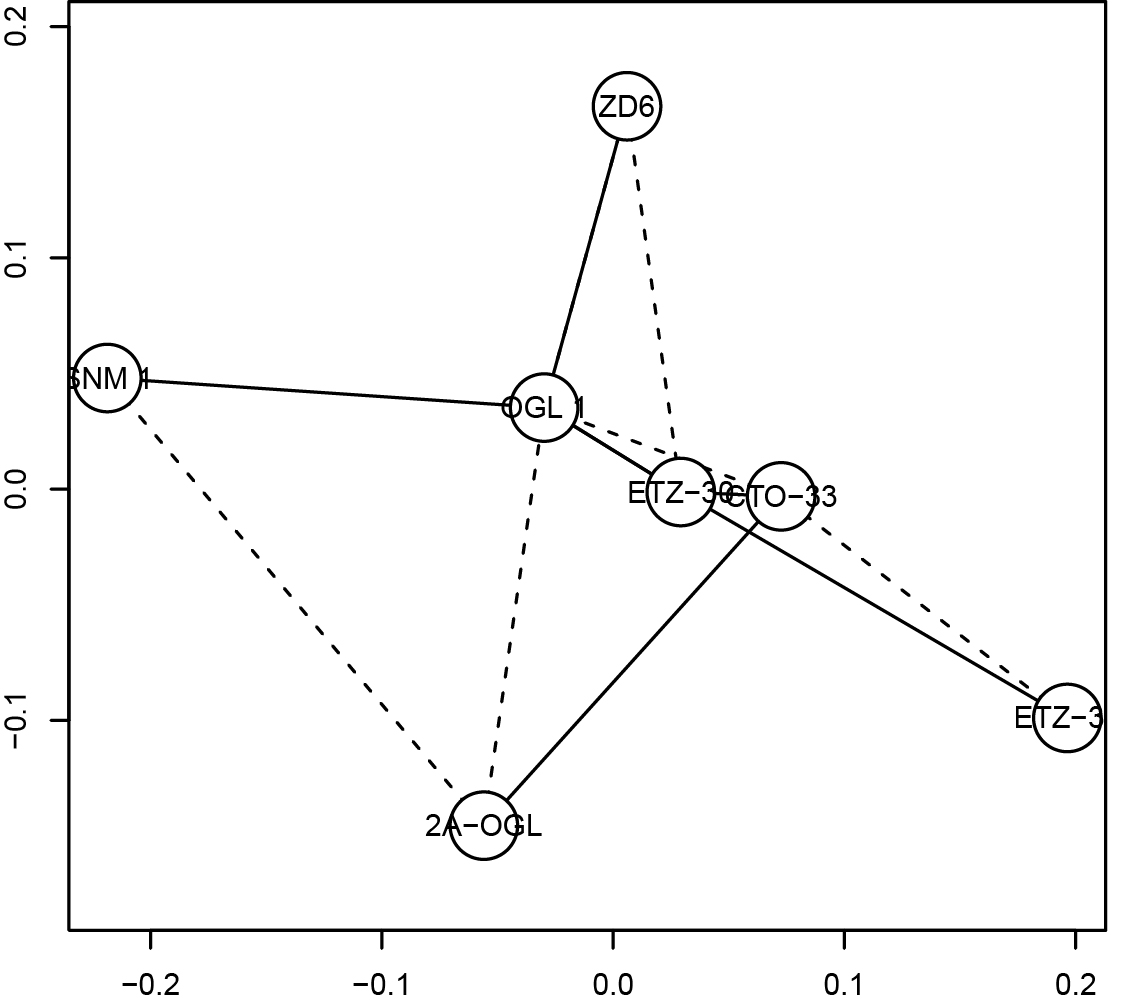

Supplement: Supplementary file 5 [file se-12-835-2021-supplement.zip › SUPP FILE FIGURES/FIG_SF1_5_MDS OMZ.jpg]

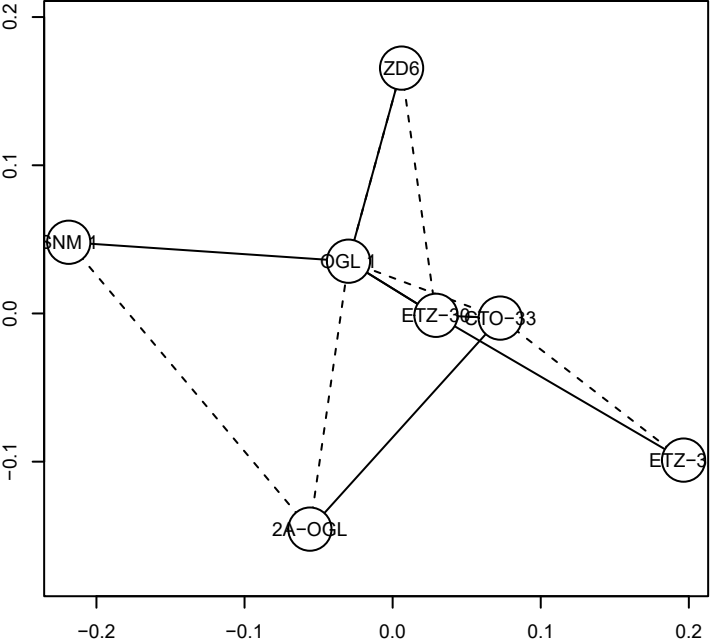

Supplement: Supplementary file 5 [file se-12-835-2021-supplement.zip › SUPP FILE FIGURES/FIG_SF1_5_MDS OMZ.pdf]

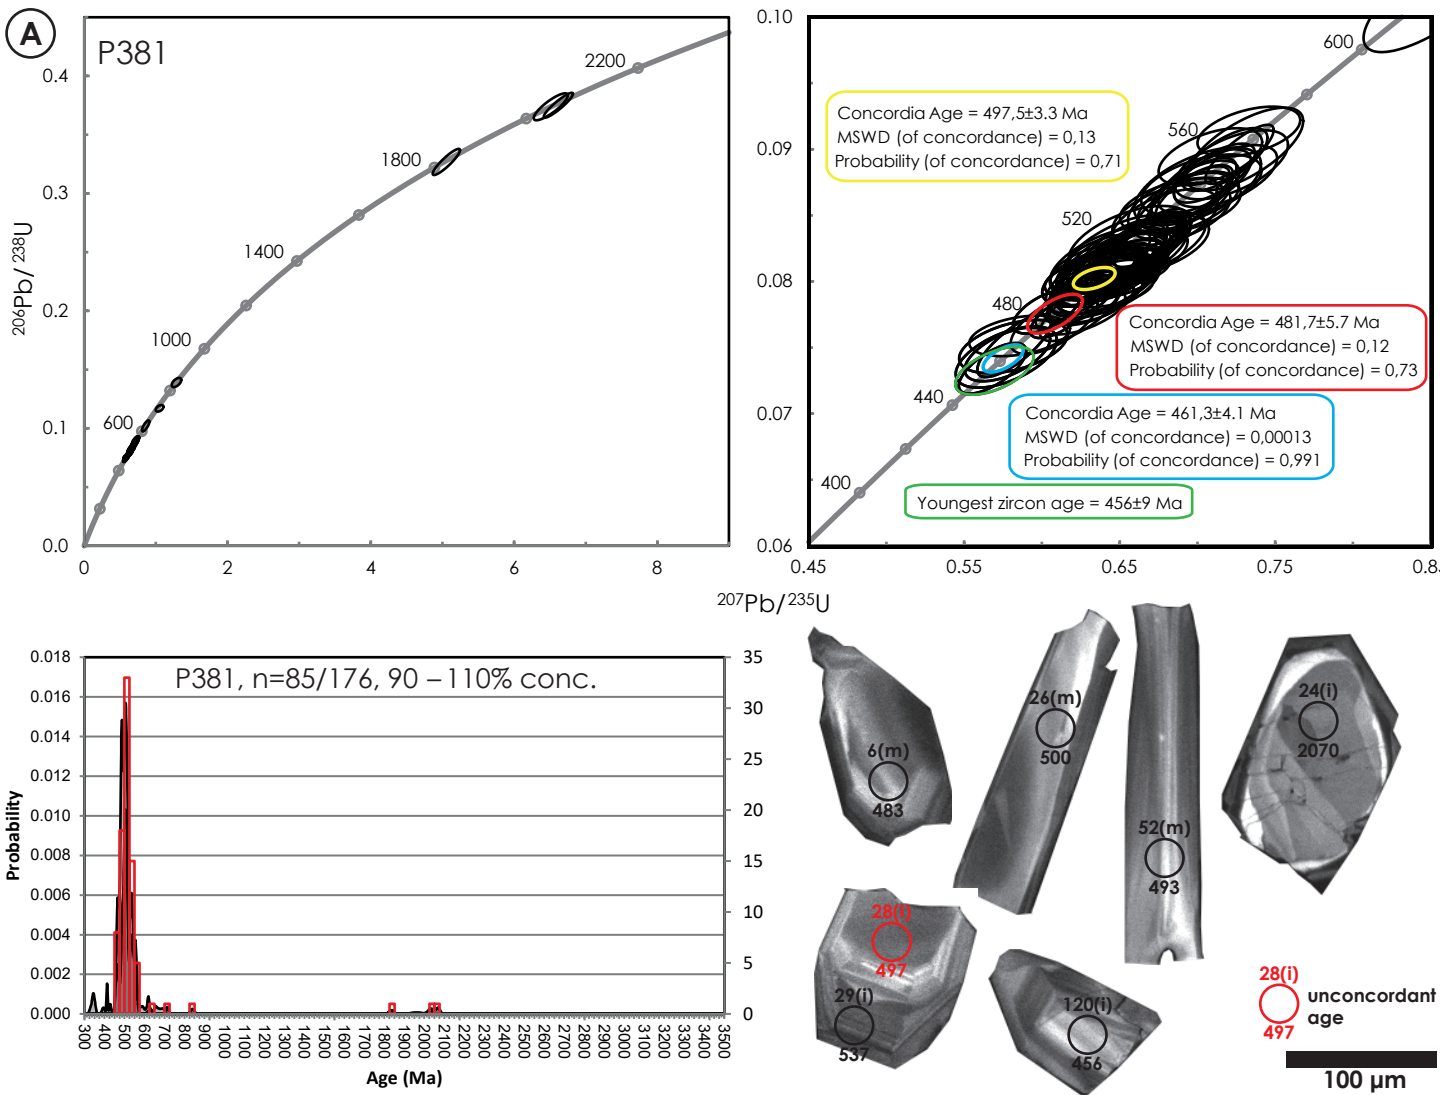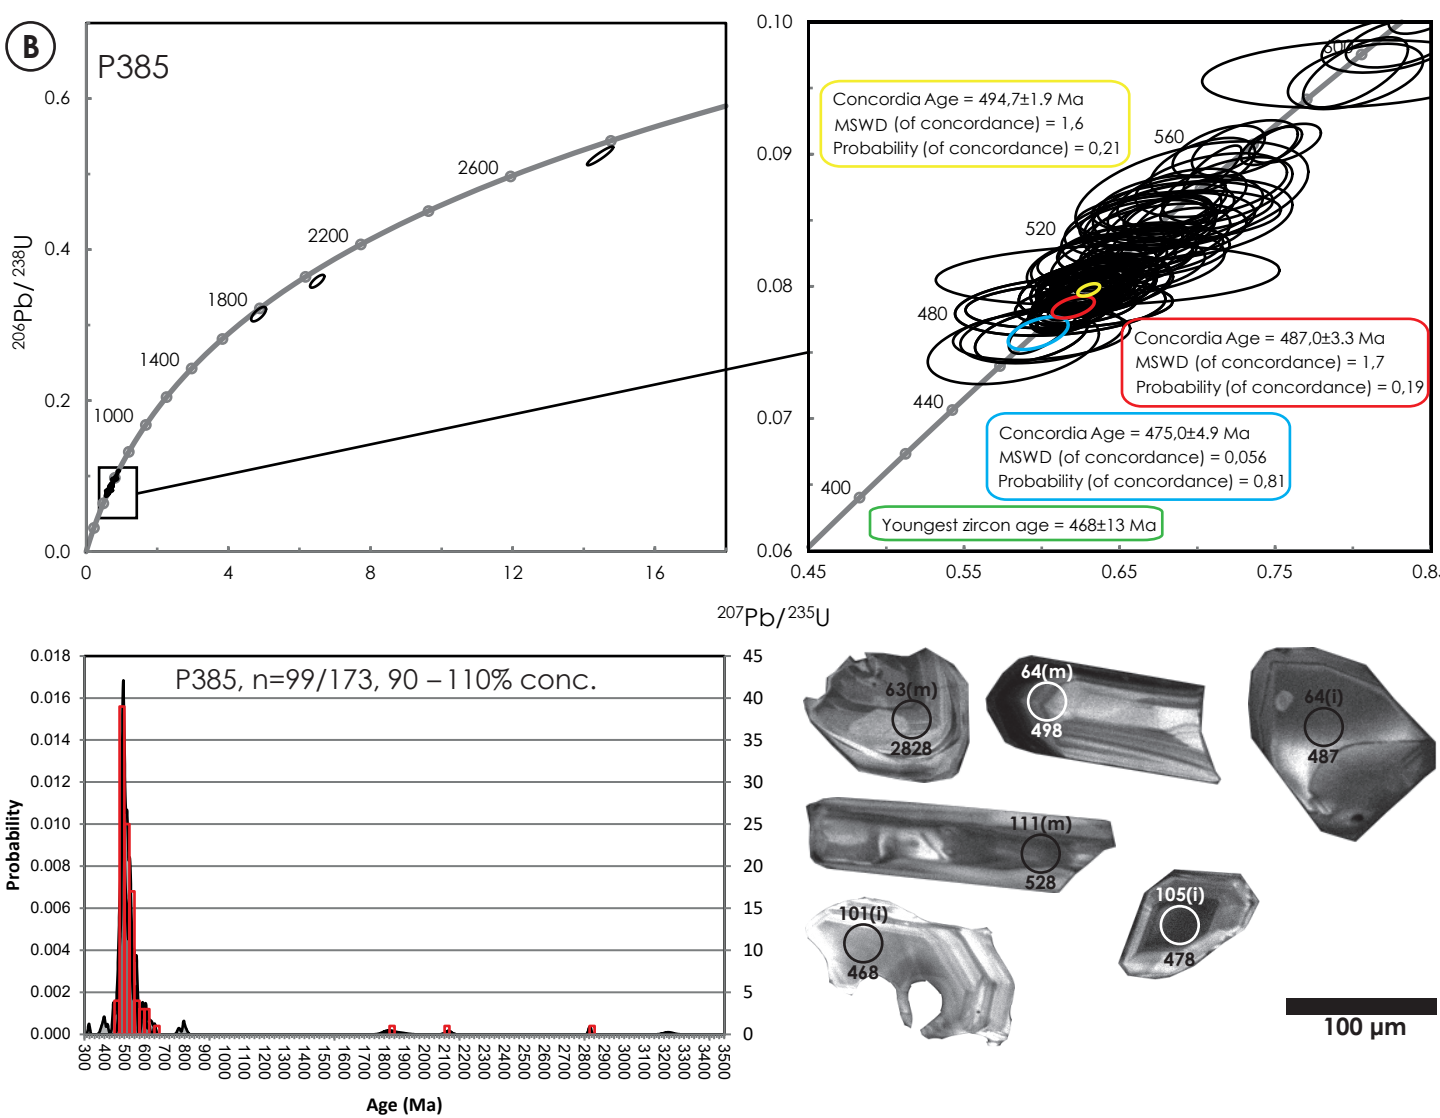

Supplement: Supplementary file 5 [file se-12-835-2021-supplement.zip › Supplementary Images/SI-7_Fichas Idades e zircões_P381_P385.pdf]

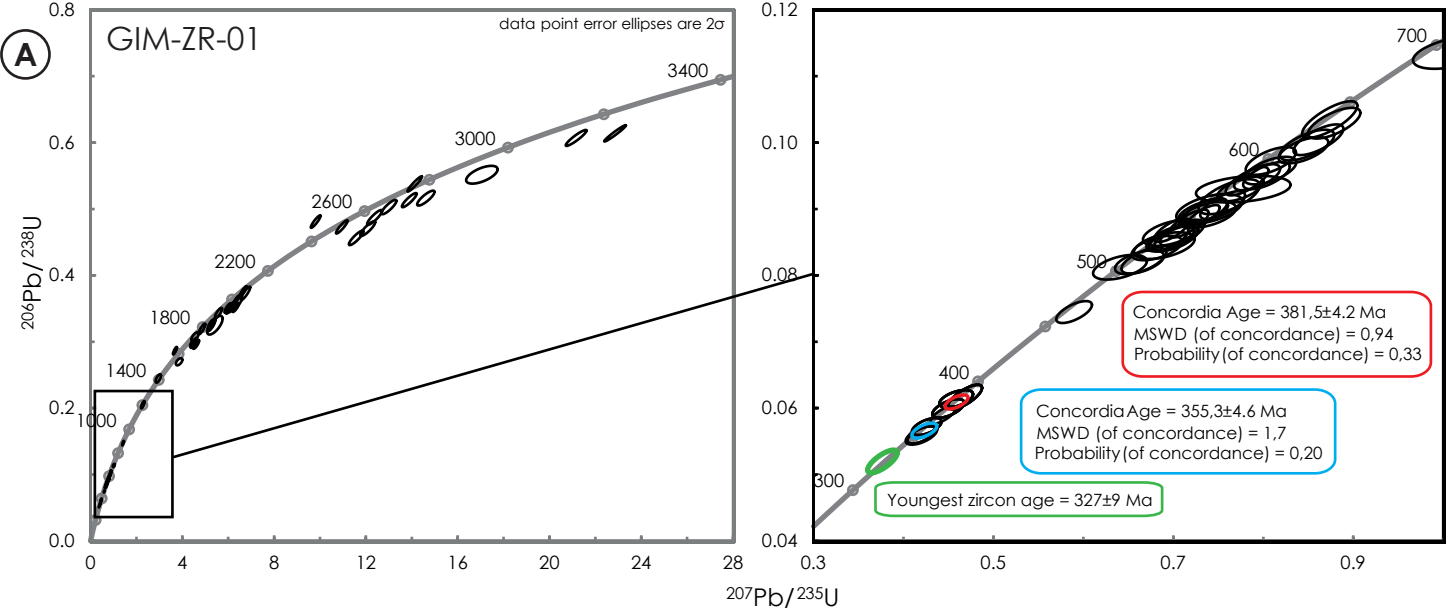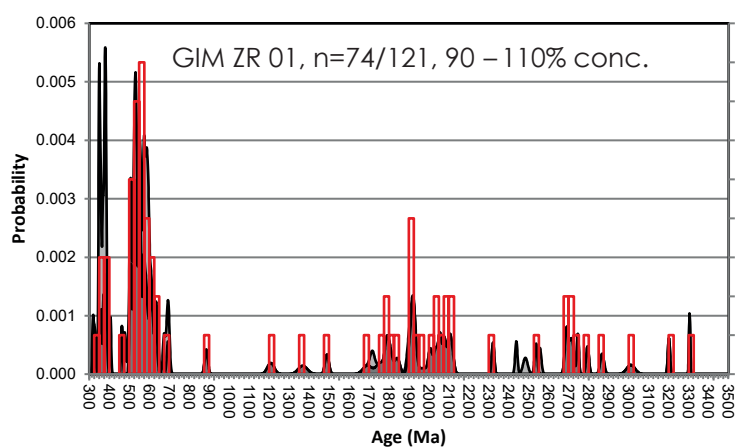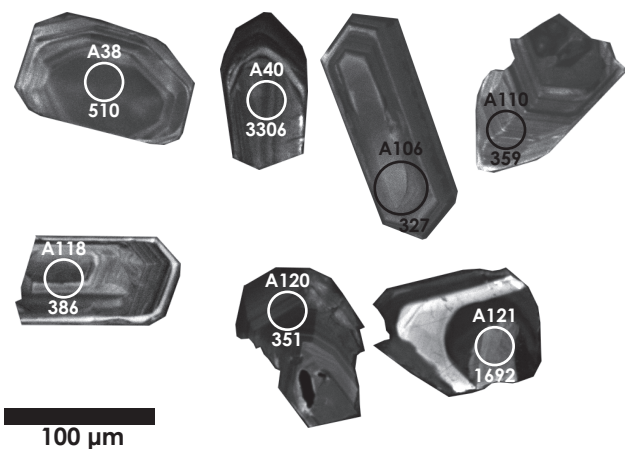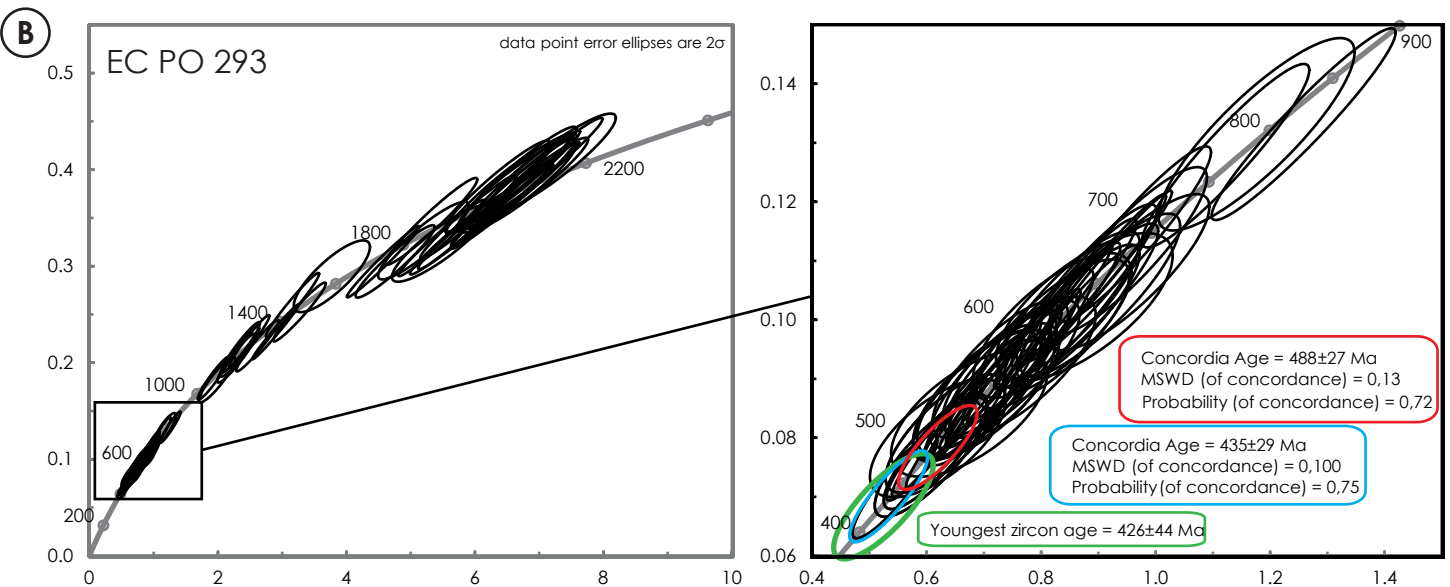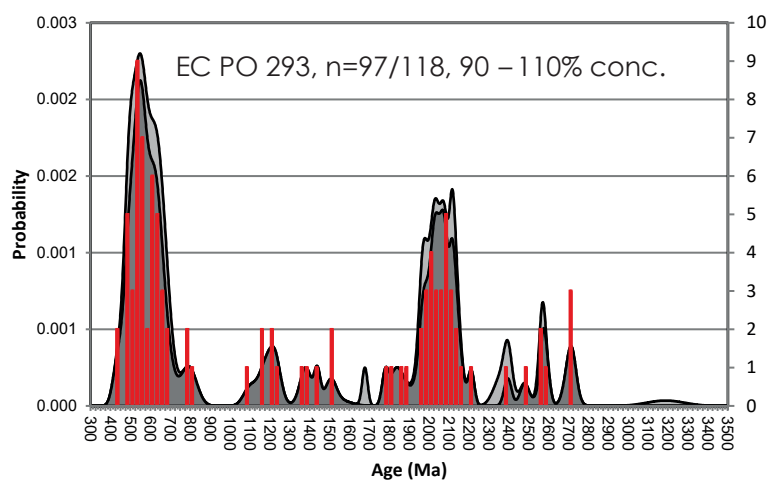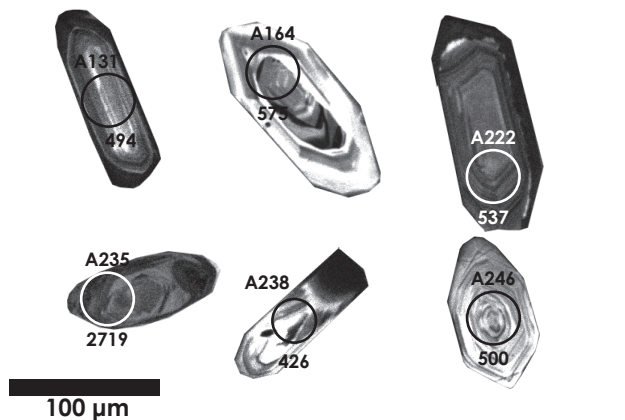

Supplement: Supplementary file 5 [file se-12-835-2021-supplement.zip › Supplementary Images/SI-2_Fichas Idades e zircões_GIM_EC293.pdf]

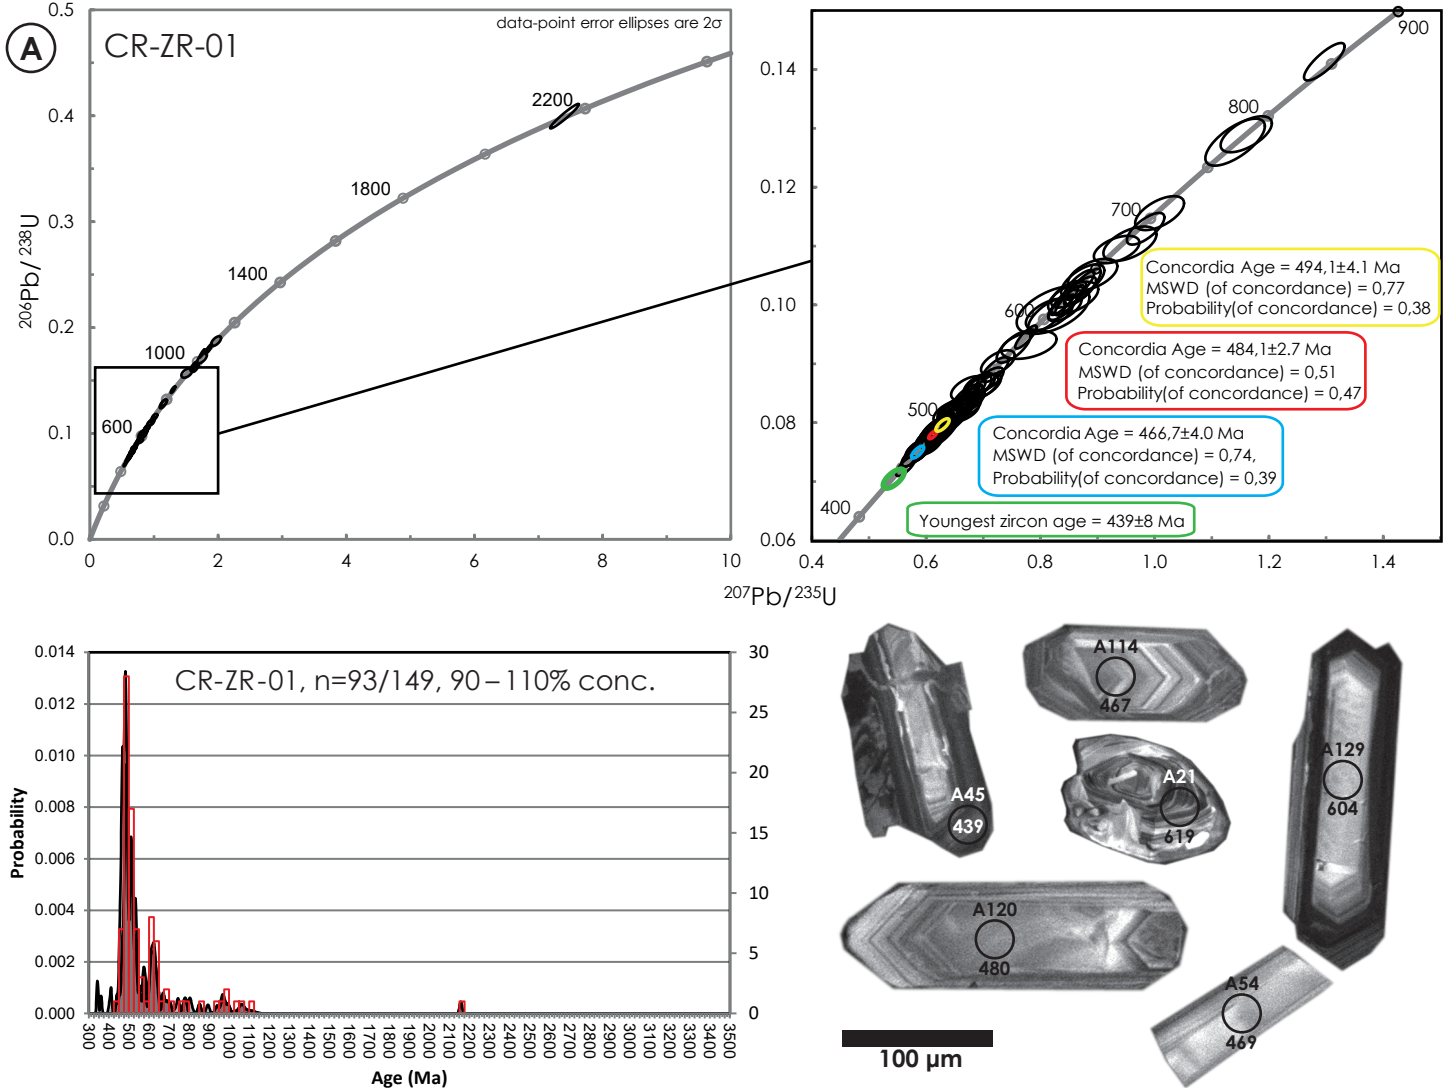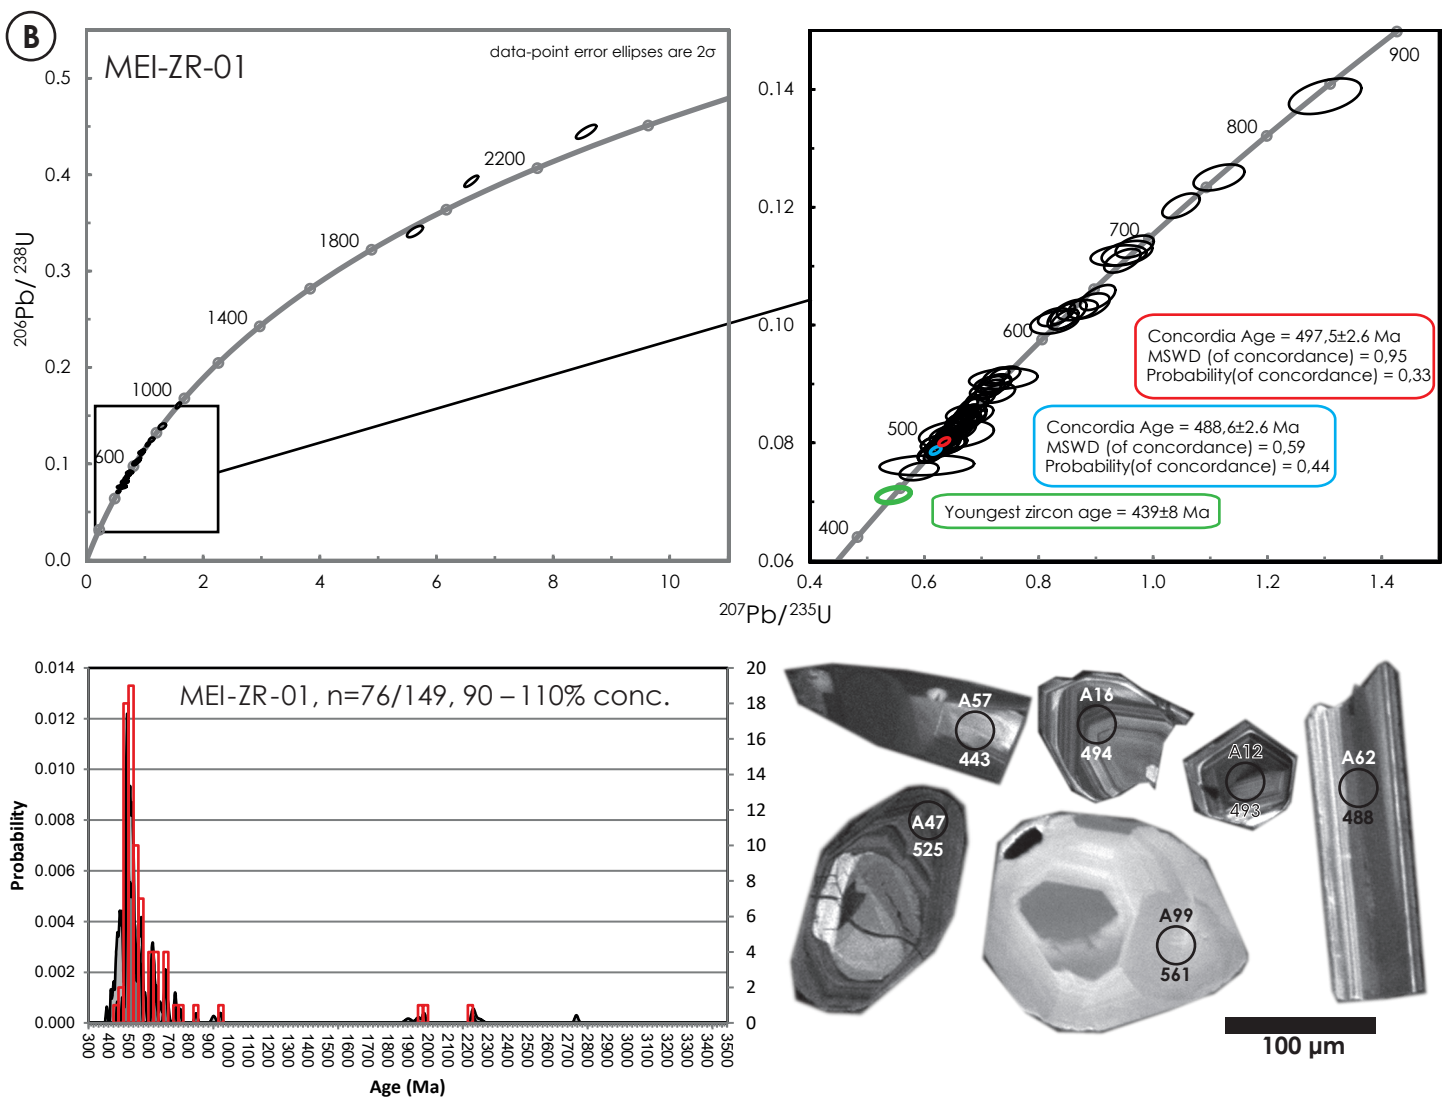

Supplement: Supplementary file 5 [file se-12-835-2021-supplement.zip › Supplementary Images/SI-1_Fichas Idades e zircões_CR_MEI.pdf]

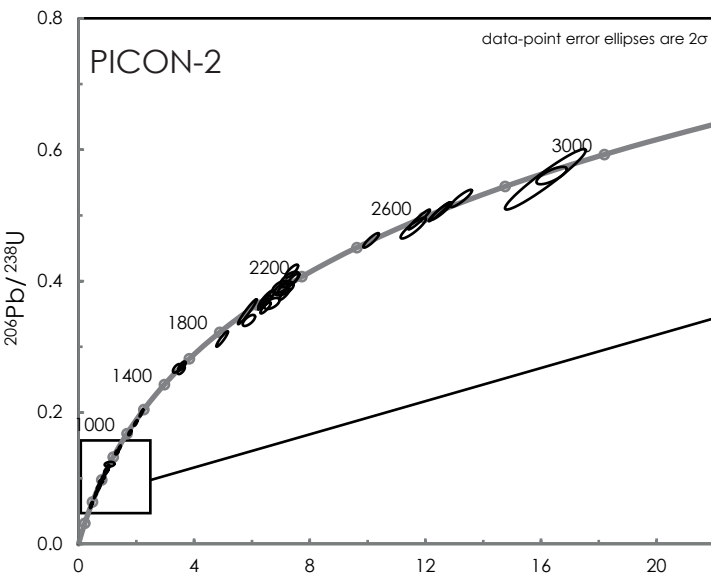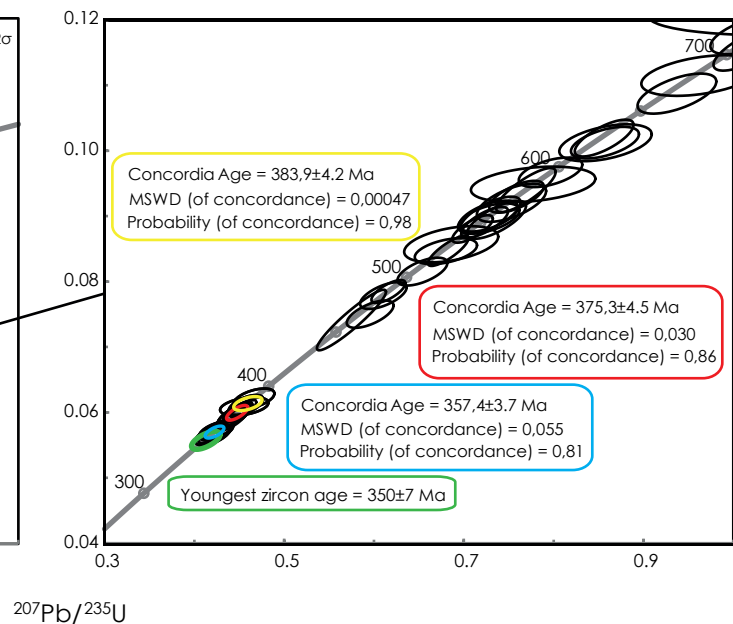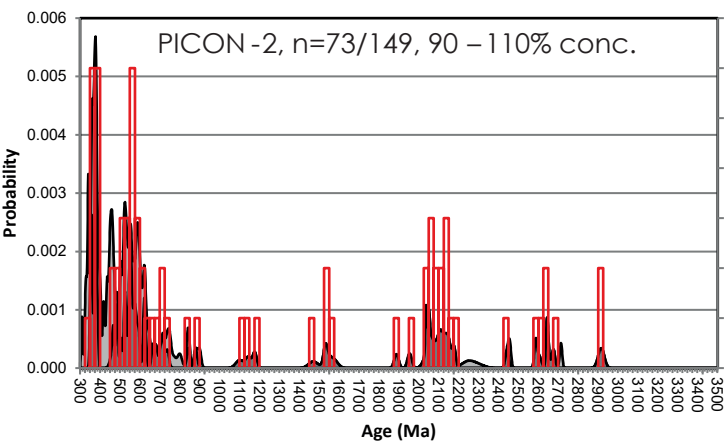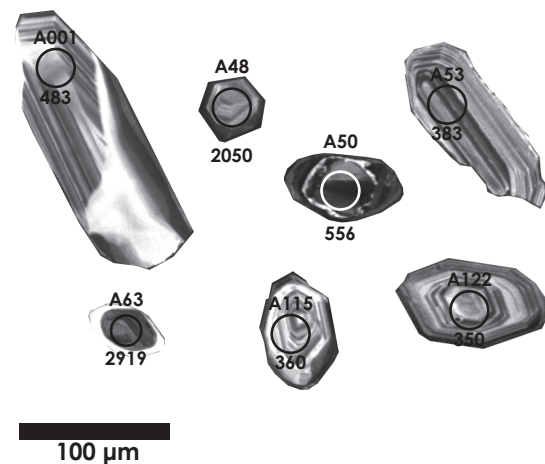

Supplement: Supplementary file 5 [file se-12-835-2021-supplement.zip › Supplementary Images/SI-6_Fichas Idades e zircões_PICON.pdf]

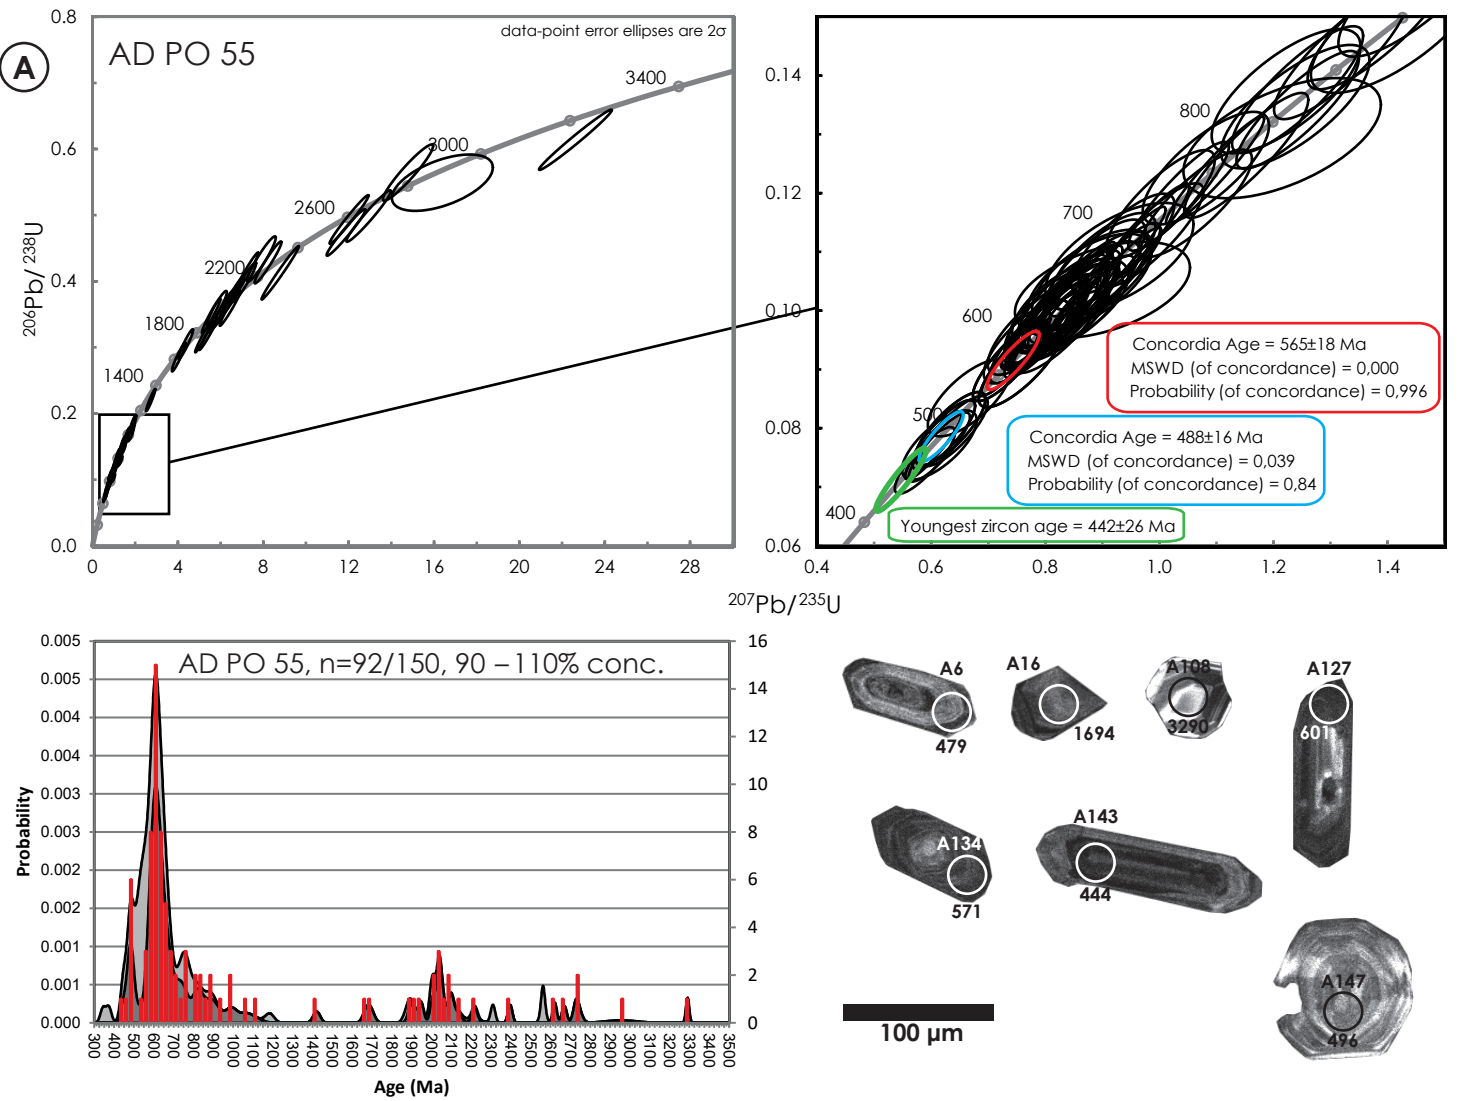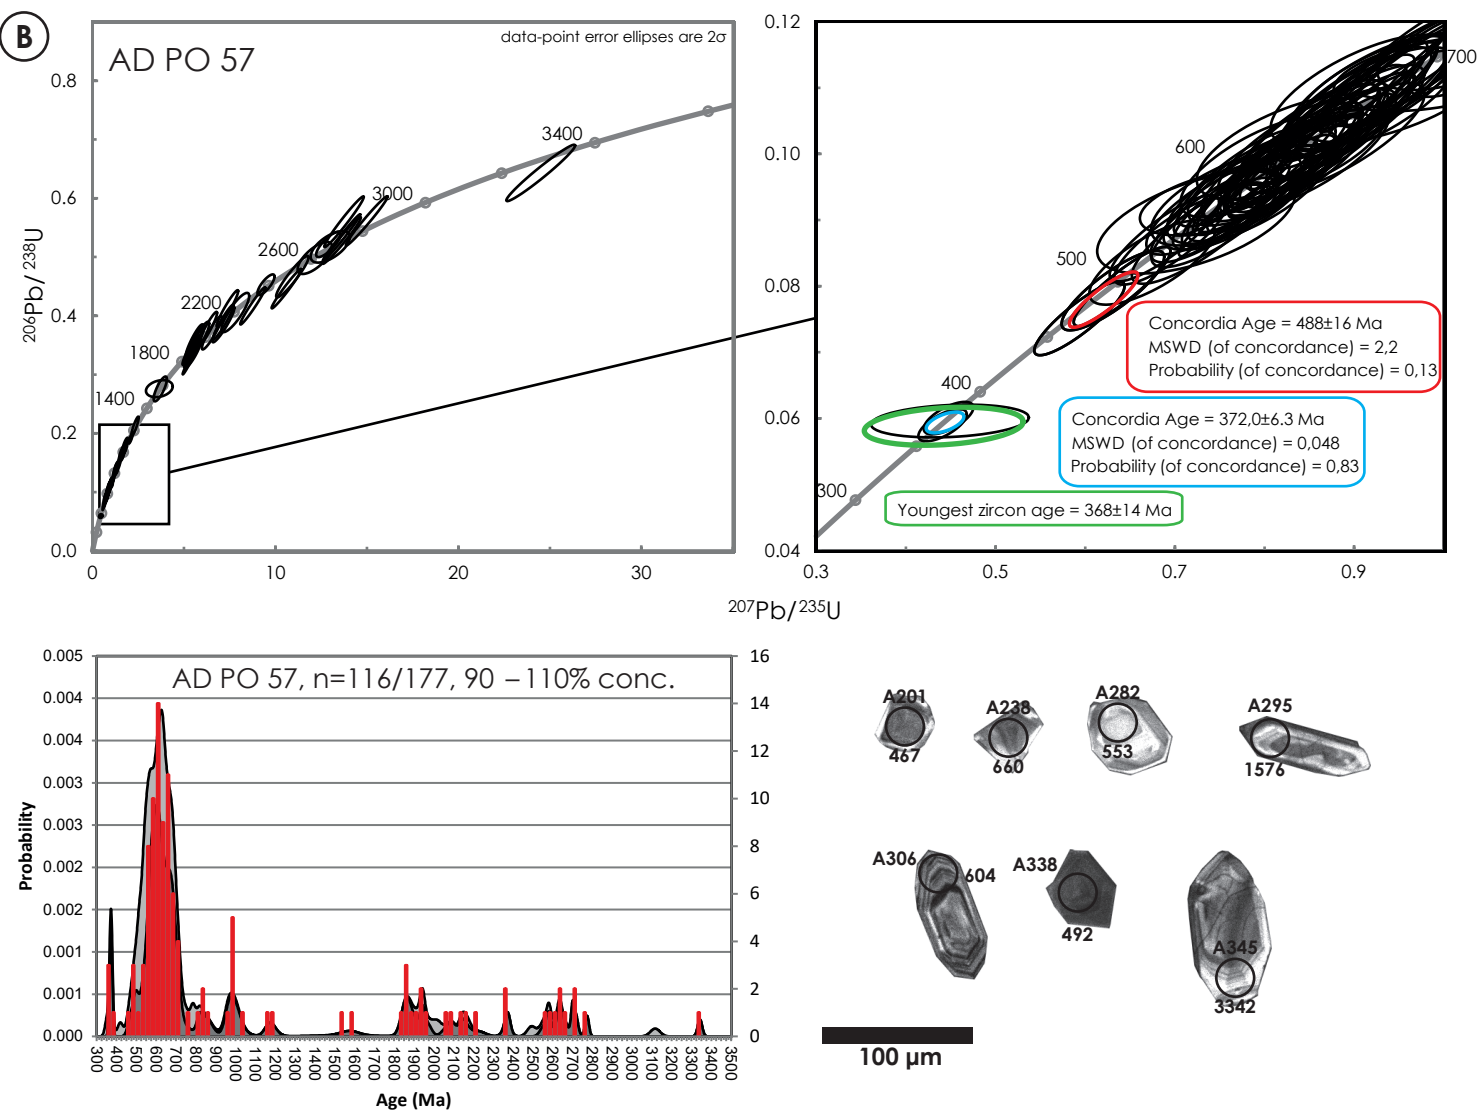

Supplement: Supplementary file 5 [file se-12-835-2021-supplement.zip › Supplementary Images/SI-5_Fichas Idades e zircões_AD55_AD57.pdf]

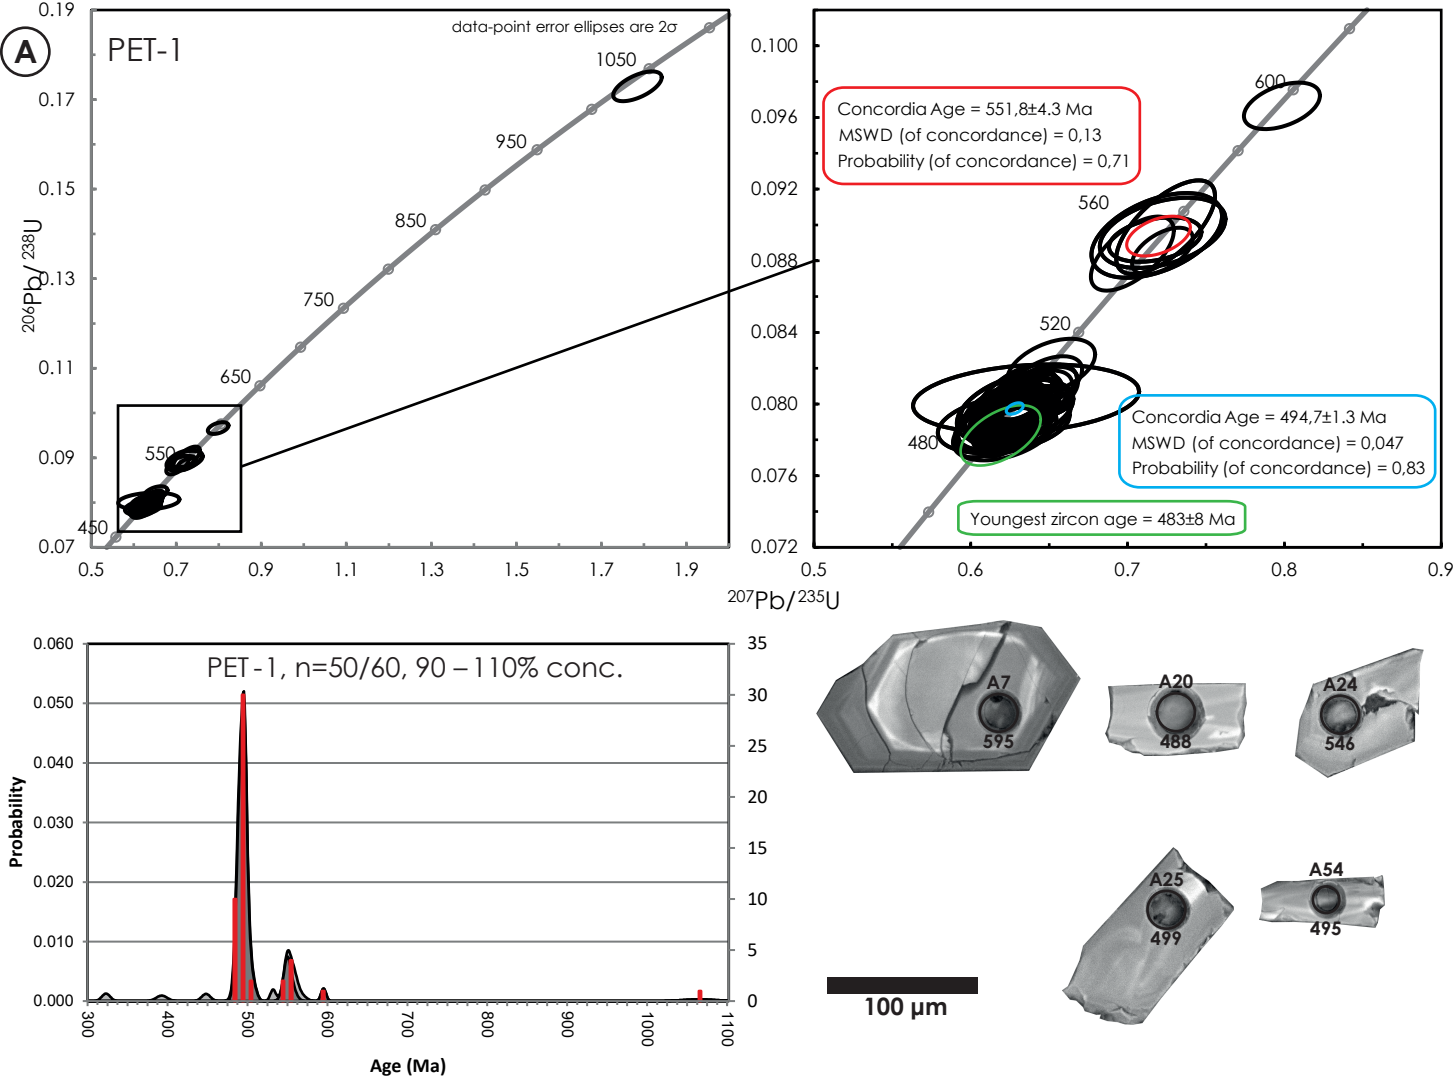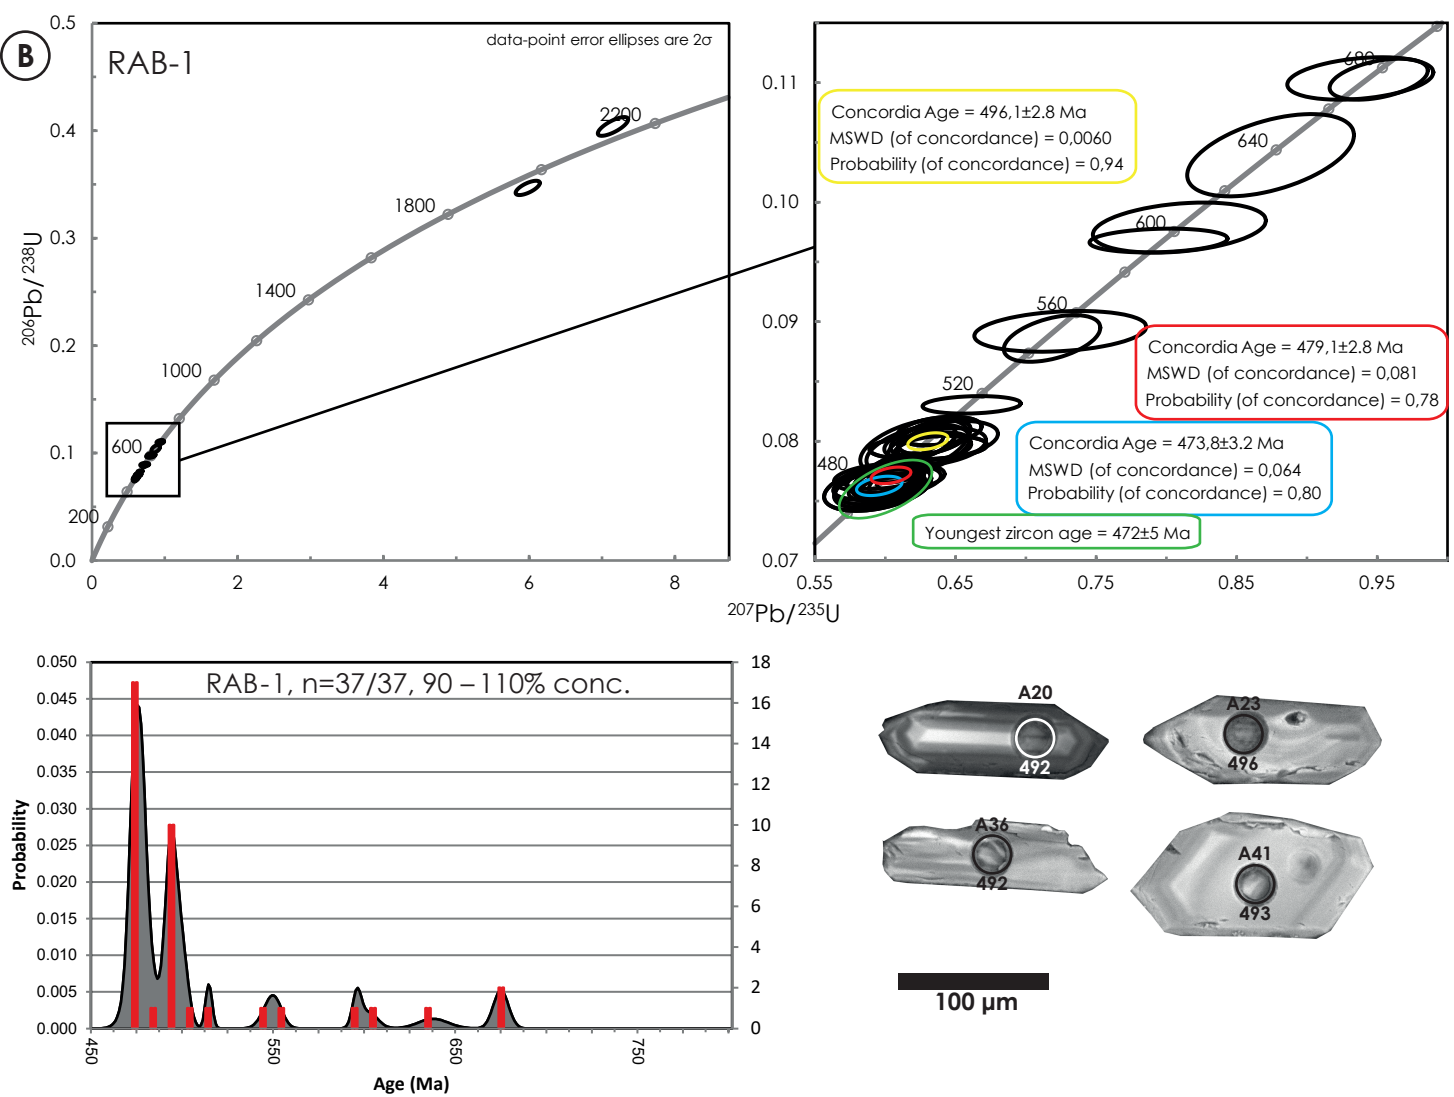

Supplement: Supplementary file 5 [file se-12-835-2021-supplement.zip › Supplementary Images/SI-9_Fichas Idades e zircões_PET1_RAB1.pdf]

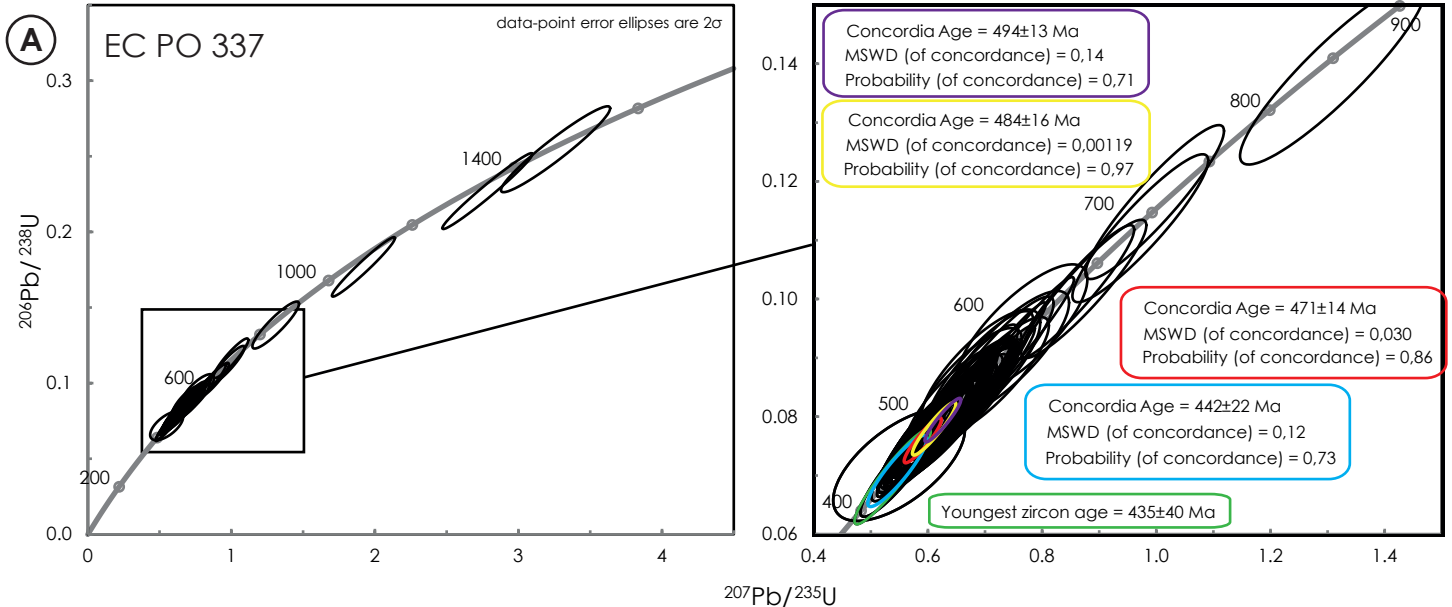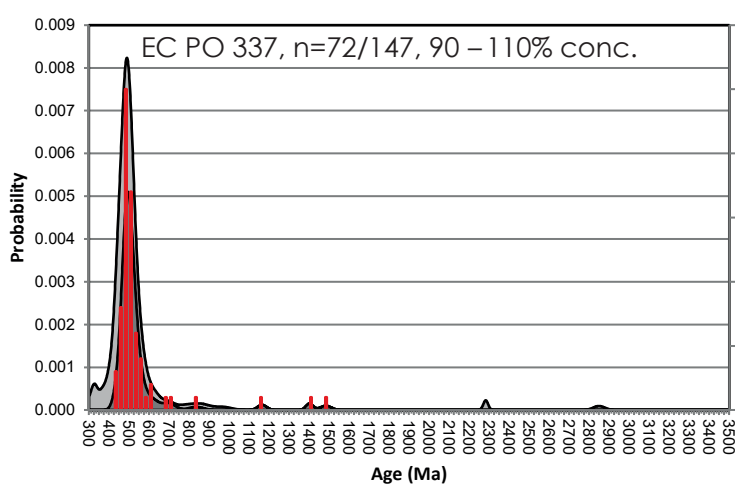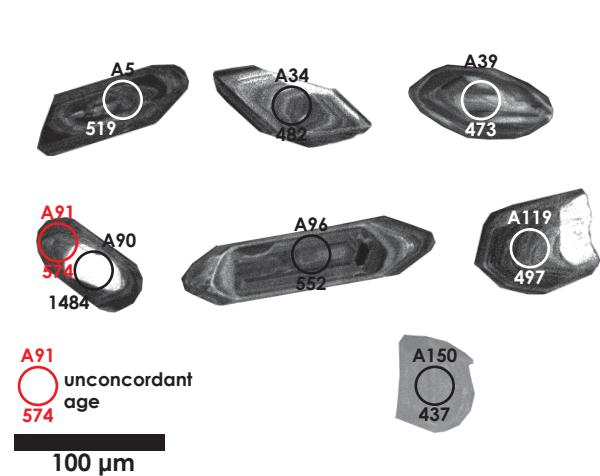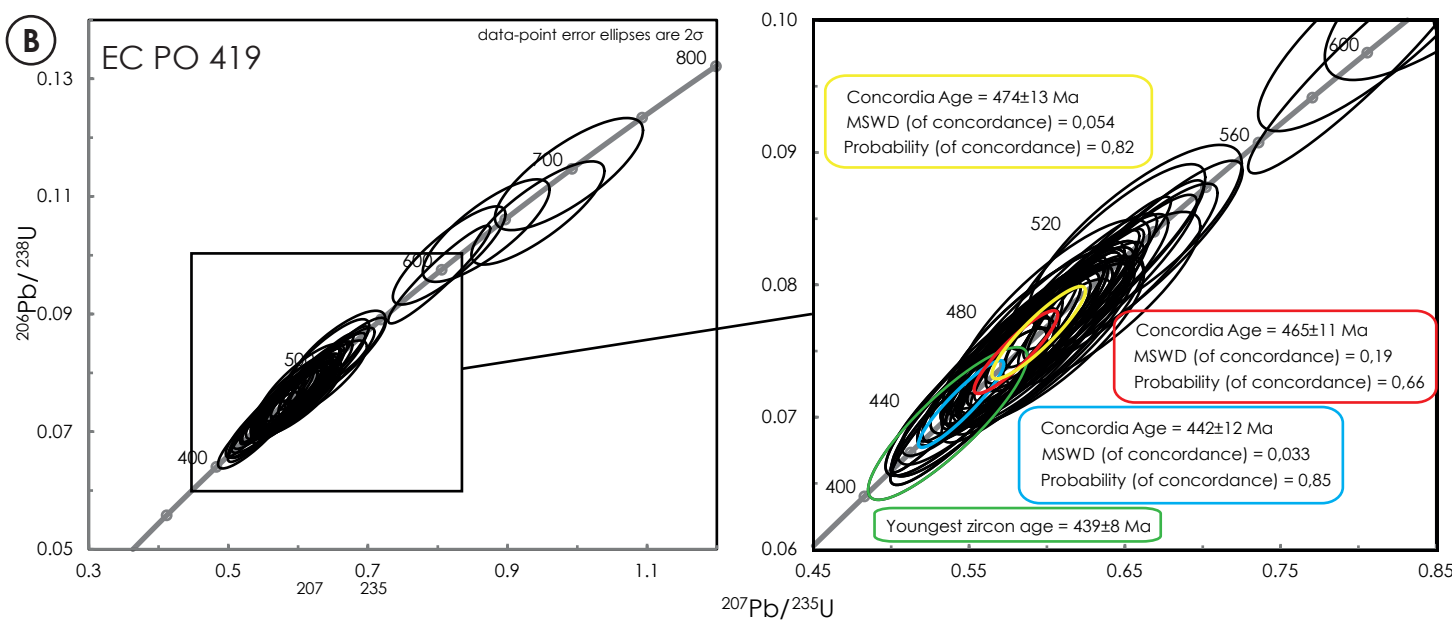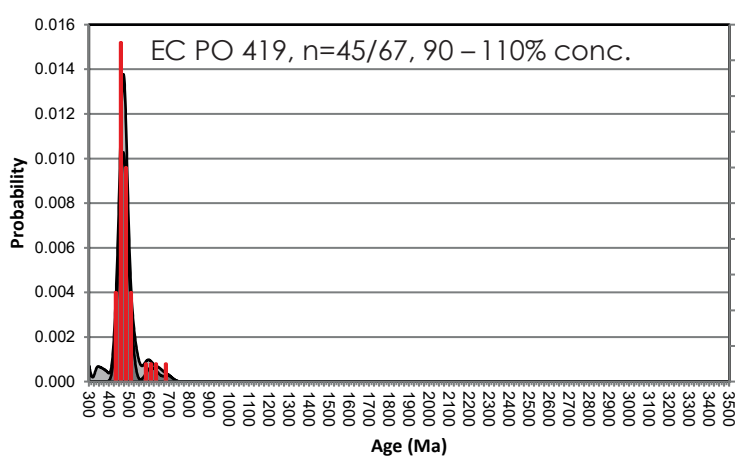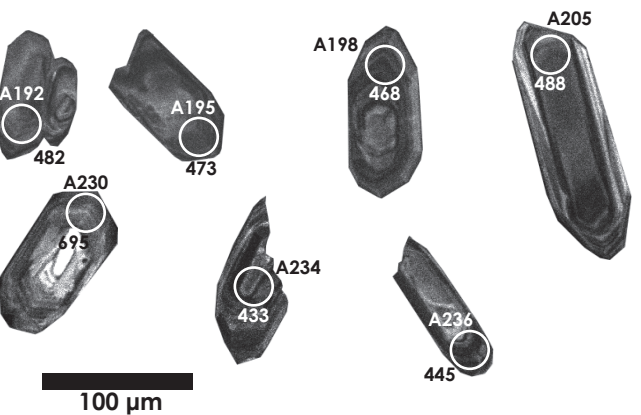

Supplement: Supplementary file 5 [file se-12-835-2021-supplement.zip › Supplementary Images/SI-8_Fichas Idades e zircões_EC337_EC419.pdf]

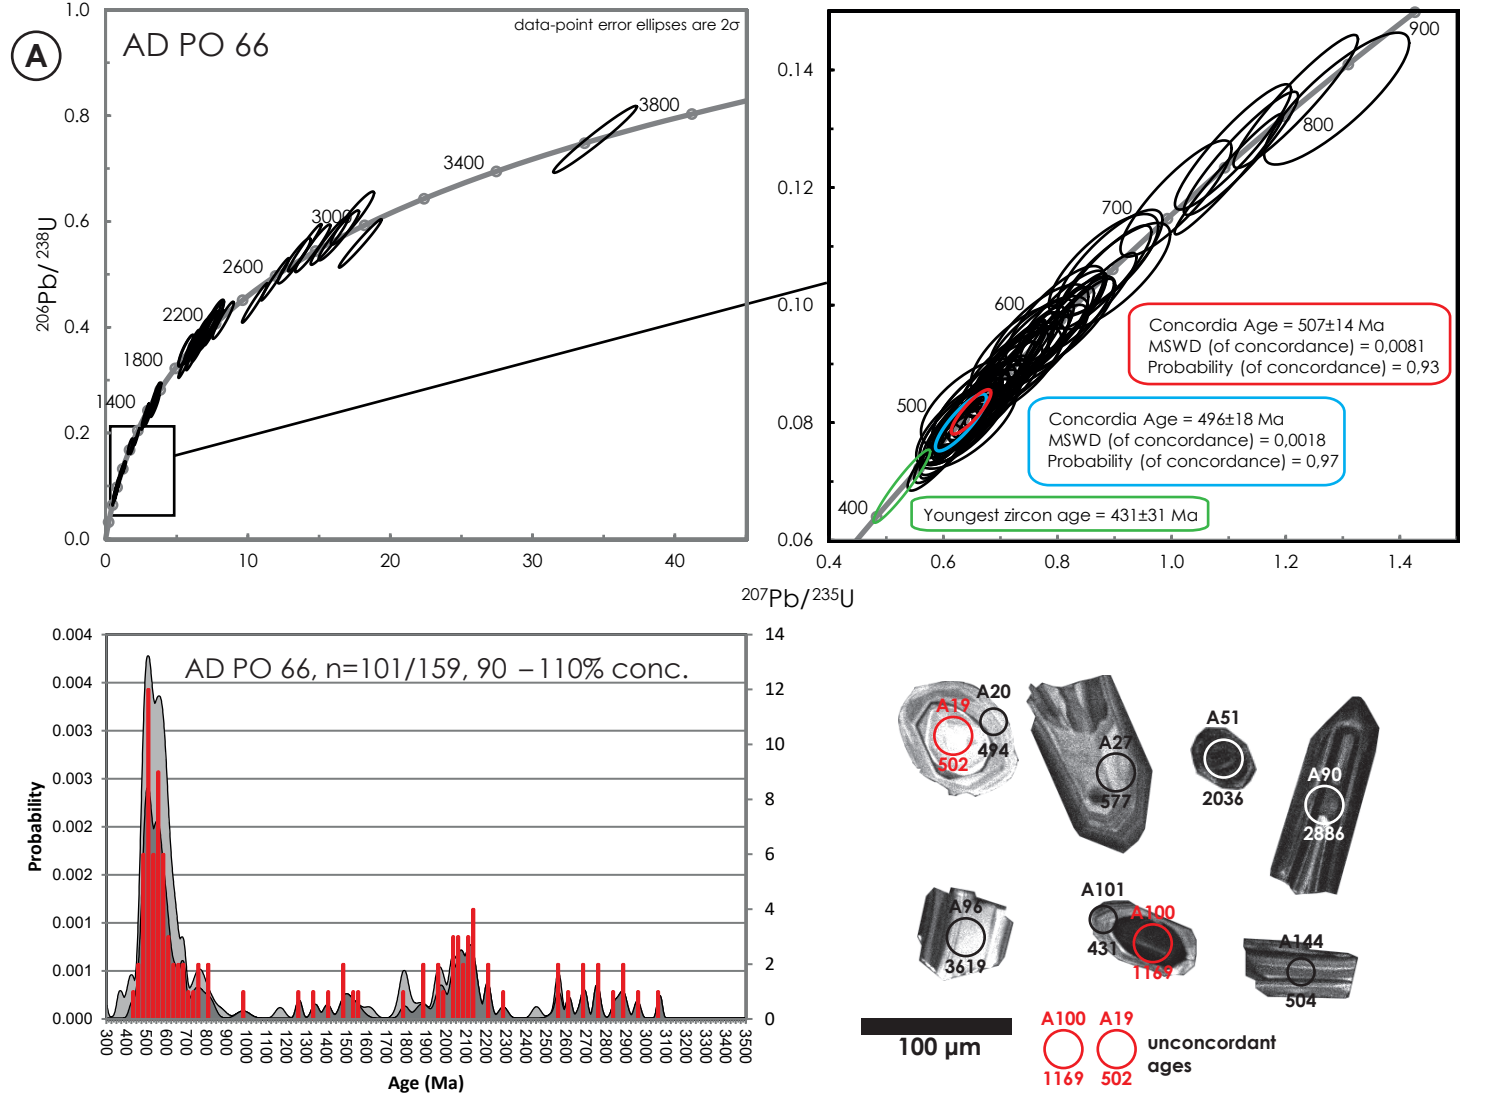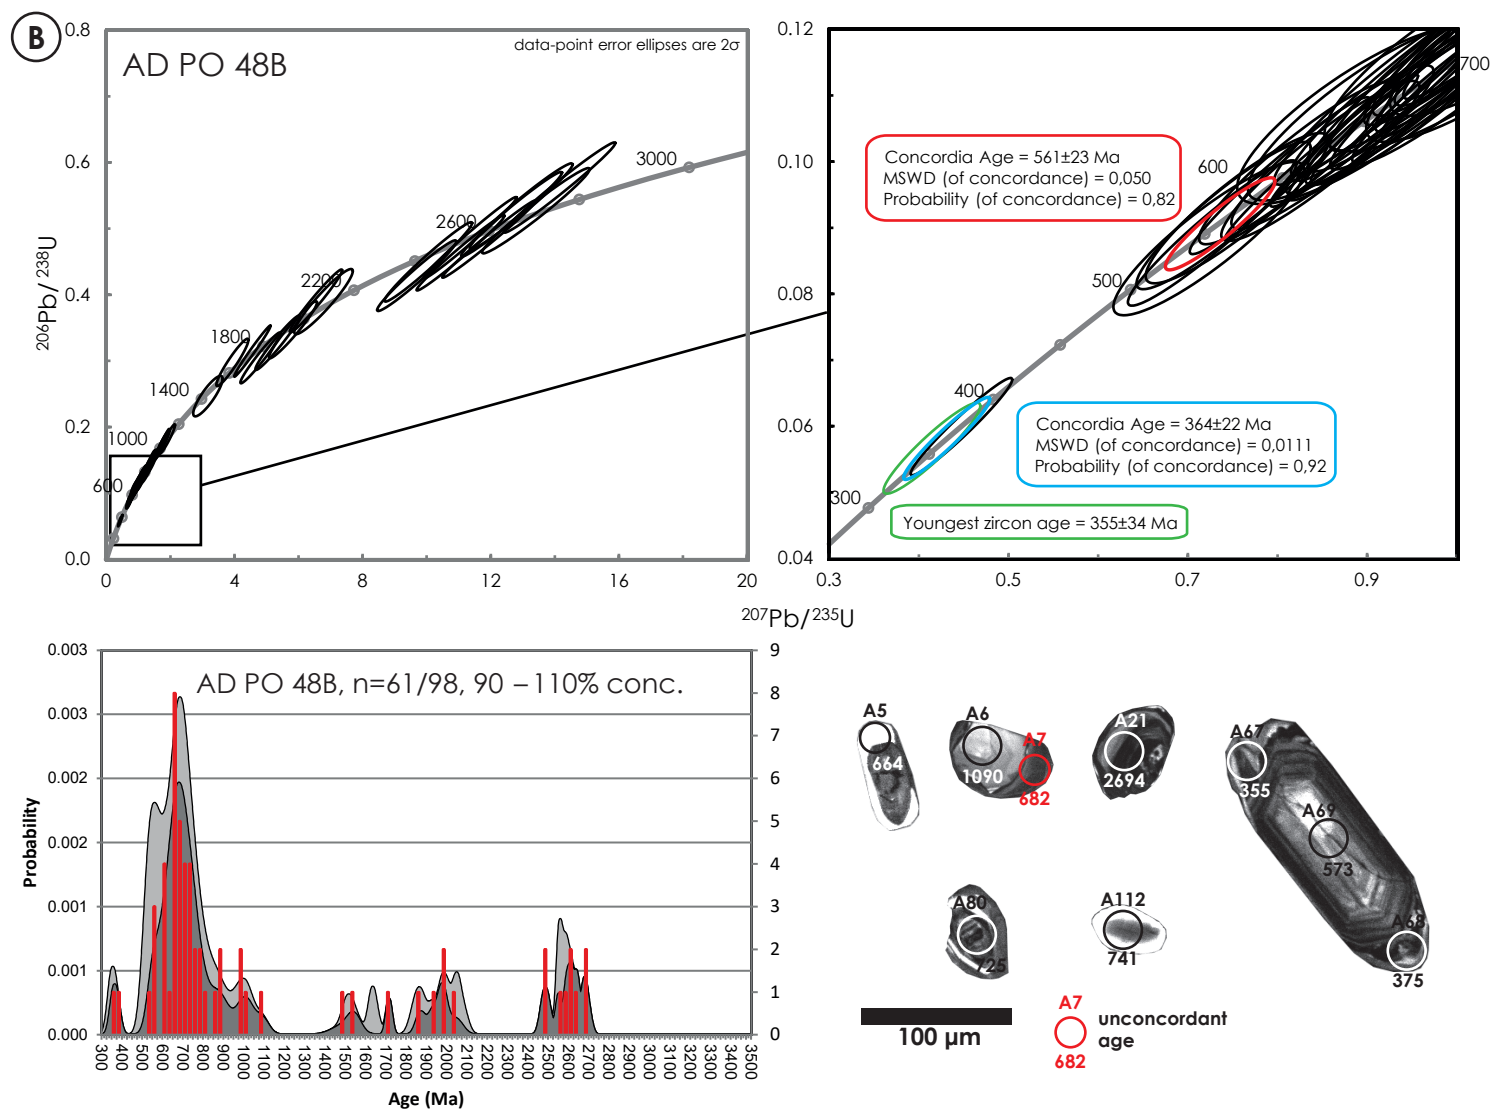

Supplement: Supplementary file 5 [file se-12-835-2021-supplement.zip › Supplementary Images/SI-3_Fichas Idades e zircões_AD66_AD48B.pdf]

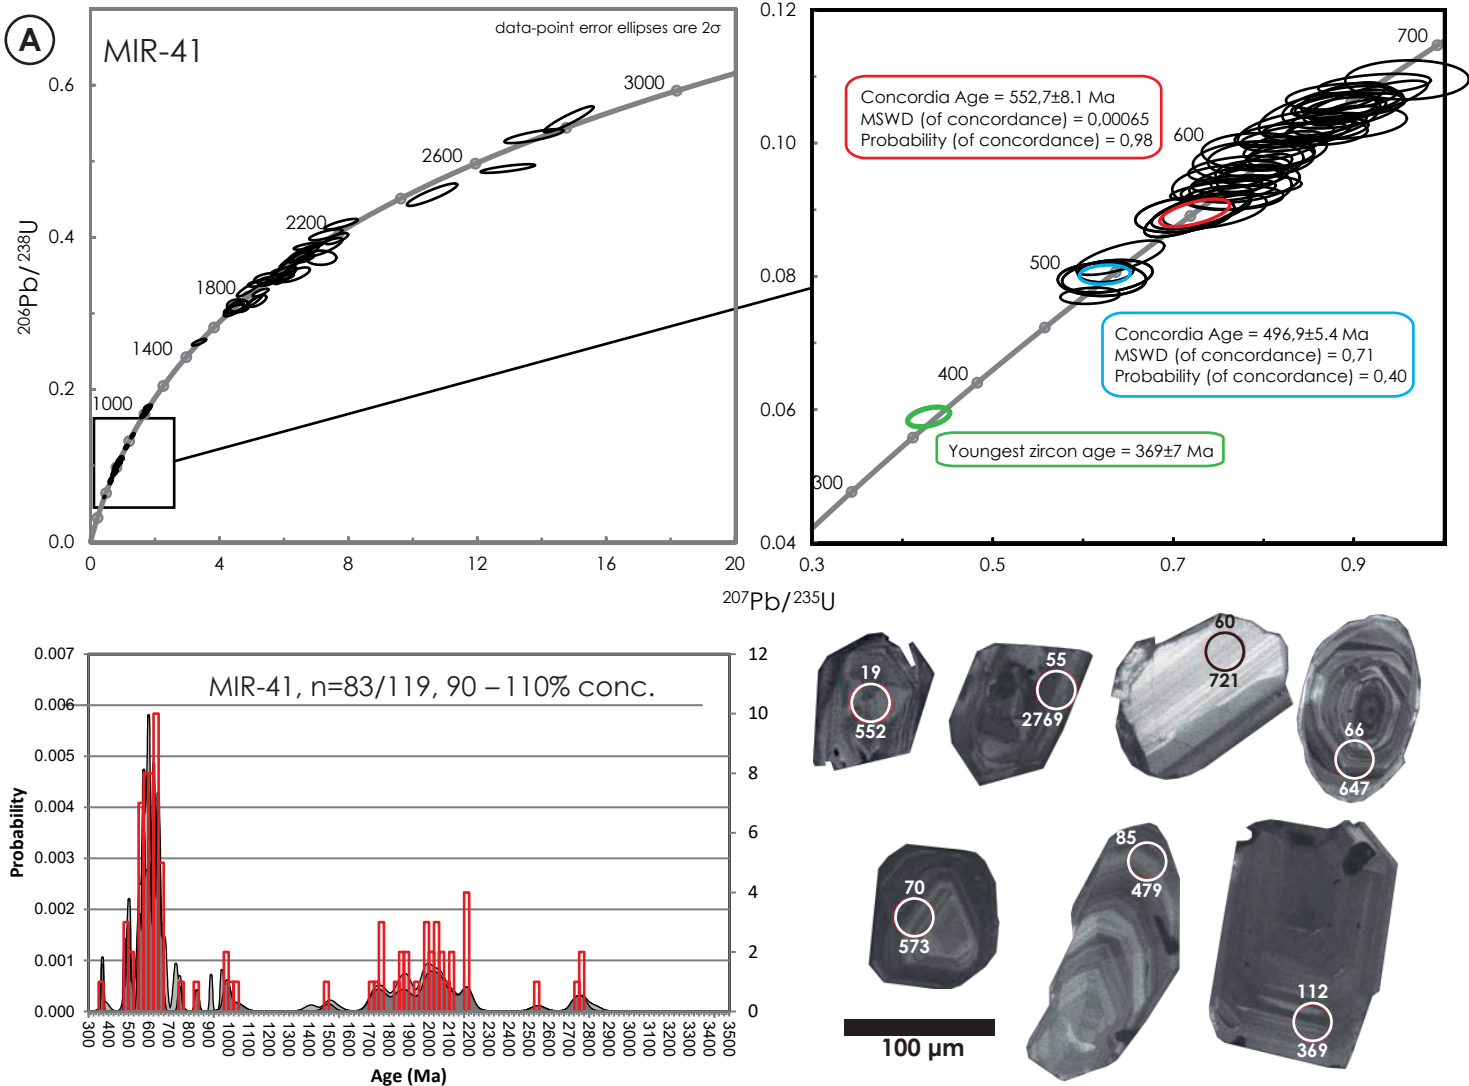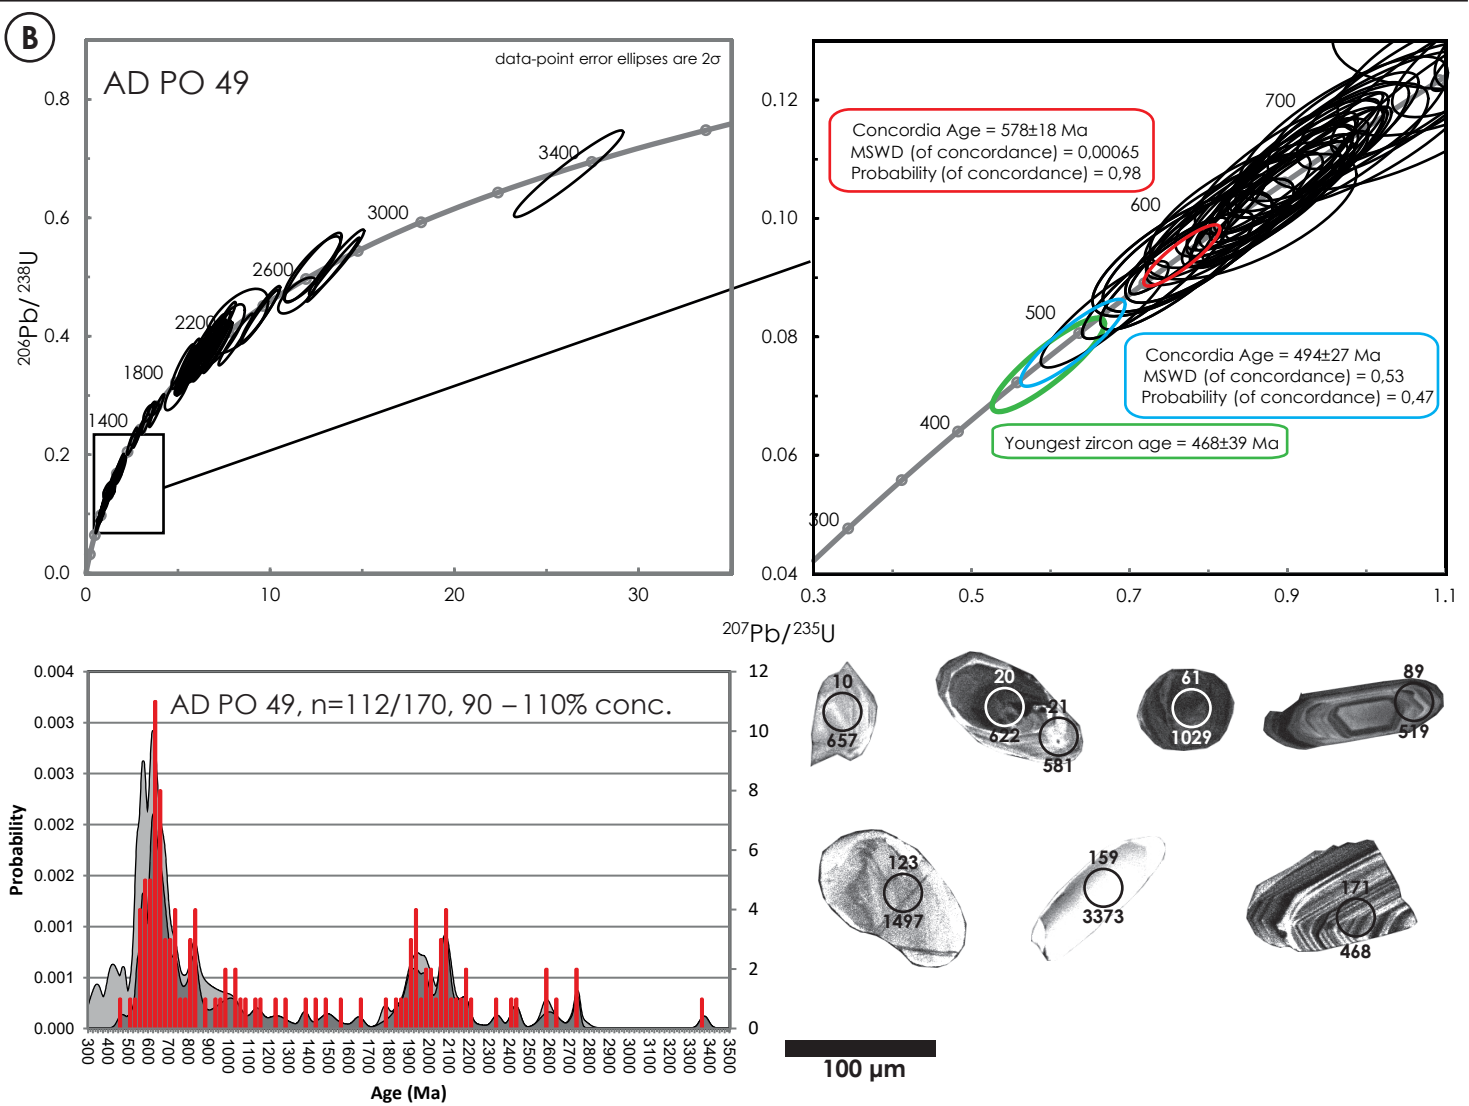

Supplement: Supplementary file 5 [file se-12-835-2021-supplement.zip › Supplementary Images/SI-4_Fichas Idades e zircões_MIR_AD49.pdf]
